# Supplementary material for: Intermittent fasting attenuates CNS inflammaging - rebalancing the transposonome
Source: Research Square preprint supplement (doi:10.21203/rs.3.rs-6165725/v1), 2025-03-12
Supplement: Supplementary file 1 [file 04c1aefc1529a3a2a12dcded.xlsx]

## Sheet: Table S1
Young v Middle				Young v Old
CTX	HIP	CB	SC	CTX	HIP	CB	SC
1700063D05Rik	AY036118	3222401L13Rik	1700063D05Rik	1700016K19Rik	3222401L13Rik	0610043K17Rik	1110015O18Rik
2310002F09Rik	4930452G13Rik	4930522L14Rik	1700120C14Rik	1700063D05Rik	4930452G13Rik	1700028P14Rik	1500012K07Rik
2310022B05Rik	7630403G23Rik	9330154J02Rik	2900052N01Rik	2310002F09Rik	7630403G23Rik	1810010H24Rik	1700008O03Rik
2410006H16Rik	7SK	9630013A20Rik	3222401L13Rik	2410018L13Rik	9330199G10Rik	3110080E11Rik	1700017B05Rik
2600014E21Rik	9330199G10Rik	9930111J21Rik1	4930452G13Rik	2410137M14Rik	9630013A20Rik	3222401L13Rik	1700028E10Rik
2610011E03Rik	9630013A20Rik	A330023F24Rik	4932435O22Rik	2810407A14Rik	A2m	4732463B04Rik	1700030C10Rik
2700081O15Rik	A530053G22Rik	A530053G22Rik	5033421B08Rik	3222401L13Rik	A330015K06Rik	4833422M21Rik	1700063D05Rik
3222401L13Rik	Abca8a	Abca8a	9330199G10Rik	5033421B08Rik	A530053G22Rik	4930522L14Rik	1700066M21Rik
4933432I09Rik	Adamts15	Abi3	9630013A20Rik	5330434G04Rik	A830036E02Rik	4932438H23Rik	1810037I17Rik
5031425E22Rik	Adamts18	Adam19	A130071D04Rik	6530403H02Rik	AA414992	5033421B08Rik	2310058D17Rik
5330434G04Rik	Aspm	Ankdd1b	A330015K06Rik	9130017K11Rik	Abca8a	5330434G04Rik	2410004P03Rik
6330403K07Rik	C3	Aox3	A330076C08Rik	9330117O12Rik	Acer2	5430403G16Rik	2410006H16Rik
6330403L08Rik	C4b	AY036118	A530053G22Rik	9330121K16Rik	Adamts18	5430420F09Rik	2610002M06Rik
6330409D20Rik	Cacna2d4	B2m	A830008E24Rik	9330199G10Rik	Adamtsl3	5430421F17Rik	2610021A01Rik
6530403H02Rik	Cbx8	Bst2	A930006I01Rik	9630013A20Rik	Adarb1	5930438M14Rik	2610203C22Rik
A230001M10Rik	Ccnb1	C1qa	Aacs	A230001M10Rik	Adgre1	7SK	2610316D01Rik
A2m	Cd209a	C1qb	Aass	A330015K06Rik	Adgrv1	9330154J02Rik	2700046A07Rik
A330015K06Rik	Cenpf	C1qc	Abca1	A330049N07Rik	Agmo	9530026P05Rik	2810410L24Rik
A430027H14Rik	Col1a1	C4b	Abca6	A530041M06Rik	Aif1	9530082P21Rik	2810459M11Rik
A930017K11Rik	Col1a2	Cacna1e	Abca8a	AA414992	Akr1b8	9630013A20Rik	2900052N01Rik
Abca8a	Draxin	Casp1	Abhd5	Abca8a	Akr1c13	9930014A18Rik	2900089D17Rik
Abhd17a	ENSMUSG00000095041	Casp12	Acer2	Abi3bp	Aldh1l2	9930111J21Rik1	3110045C21Rik
AC149090.1	Eomes	Cbr2	Acsf2	Ace	Ankdd1b	A2ml1	3110082I17Rik
AC154636.1	Fmn1	Cbx4	Acss2	Ackr1	Anxa4	A330015K06Rik	3110082J24Rik
AC156026.1	Fst	Ccnd1	Acta1	Acox3	Aplnr	A330023F24Rik	3222401L13Rik
AC157931.1	Gadd45g	Cd109	Actn3	Acp7	Apod	A330076C08Rik	3425401B19Rik
AC165278.1	Gm18529	Cd274	Adamts12	Acta2	Arl11	A530053G22Rik	4930432E11Rik
Ace	Gm25117	Cd37	Adamts2	Actn1	Aspg	A930033H14Rik	4930447K03Rik
Acp7	Gm25788	Cd52	Adamts9	Actn2	Aspm	AA467197	4930452G13Rik
Actn1	Gm31698	Cd84	Adamtsl5	Acvr2a	Atf3	Abca1	4930506C21Rik
Adam19	Gm34567	Cda	Adgre1	Adam19	AU020206	Abca8a	4930525G20Rik
Adgra2	Gm42756	Cldn11	Adgrg2	Adam33	AY036118	Abca8b	4930556M19Rik
Adgra3	Gm49375	Clec7a	Adipor2	Adamts16	B2m	Abcc12	4930581F22Rik
Adgrb2	Gnasas1	Cmtm7	Aif1	Adamts18	Bst2	Abi3	4930594M22Rik
Adnp	Gpr17	Col1a1	Alas2	Adamts3	Btaf1	Adam19	4932435O22Rik
Adra2a	H3c2	Col1a2	Ankdd1b	Adamts5	C1qa	Adamts18	4932438H23Rik
Adra2c	Hgf	Col23a1	Ankef1	Adamtsl5	C1qb	Adamts5	4933405O20Rik
Agap2	Igfbpl1	Col3a1	Aplnr	Adcy2	C1qc	Adamts6	5033421B08Rik
Akain1	Lars2	Col4a1	Apobec2	AI854703	C1ra	Adamtsl3	5430403G16Rik
Akr1c18	Lcn2	Comp	Aqp4	Akain1	C3	Adcy1	5830408C22Rik
Alcam	Luzp2	Cracdl	Arhgap15	Akap5	C3ar1	Adgrb2	5830432E09Rik
Alox8	Mir6236	Ctss	Arhgap30	Akr1c18	C4b	Adgre1	6330410L21Rik
Angptl4	Mki67	Cx3cr1	Arhgap45	Alcam	Cacna1g	Adgrl1	7SK
Anln	Mpeg1	Ddx58	Arhgdib	Aldh1a3	Cacna2d4	Adgrv1	7SK
Apol8	Pbk	Ddx60	Arl11	Aldh3b2	Capg	Aebp1	9130017K11Rik
Arhgap29	Pcdhb1	Dock2	Ass1	Alox8	Casp1	Aff2	9230116N13Rik
Armcx1	Pcdhb19	Dsc2	Atp10b	Ank1	Cbx2	Aff3	9330111N05Rik
Asah2	Pcdhb2	Dtx3l	Atp2a1	Ankdd1b	Cbx8	Aif1	9330159F19Rik
Asb16	Pcdhb4	Efemp1	AU020206	Ankrd6	Ccl12	Akr1b8	9330175E14Rik
Ass1	Pcdhb8	Egr4	B430306N03Rik	Ankrd63	Ccl3	Aldh1a2	9330188P03Rik
Atp10d	Pcdhb9	Eif2ak2	Barx2	Ankub1	Ccl6	Aldh2	9330199G10Rik
Atp6v1g1	Pcdhga2	Etnppl	BC039966	Anln	Cd22	Alpk1	9530026P05Rik
B230206L02Rik	Pirt	Ets2	Bche	Antxr1	Cd300c2	Ang	9630013A20Rik
B230209E15Rik	Prc1	Eva1c	Bcl6	Anxa4	Cd44	Ankdd1b	9630028B13Rik
B230312C02Rik	Prkcd	Eya4	Bdh1	Apcdd1	Cd48	Ankef1	9630028I04Rik
B3galt5	Ptpro	Ezr	Bdkrb2	Apol8	Cd52	Ankrd34a	9930014A18Rik
Batf3	Rad21l	Fcer1g	Bhlhe41	Appl2	Cd68	Ano5	9930111J21Rik1
Bbc3	Ramp3	Fmn1	Blnk	Aqp4	Cd84	Antkmt	9930111J21Rik2
Bcas1	Rassf10	Fmo2	Btbd16	Arhgap20	Cdh23	Anxa3	A130071D04Rik
Begain	Rgs16	Fzd1	Btk	Arhgap33	Cdhr2	Anxa4	A2m
Bhlhe22	Rn18s-rs5	Gabra2	C1qa	Arhgap6	Cela1	Aox3	A330015K06Rik
Bhlhe41	Rpph1	Gbp10	C1qb	Arhgef10	Cenpf	Apcdd1	A330049N07Rik
Bmp2	Scn7a	Gbp3	C1qc	Arhgef15	Chil1	Apobec1	A330076C08Rik
Brinp2	Sncaip	Gbp6	C1ra	Arsg	Chst3	Apoc1	A330087D11Rik
Btaf1	Sox11	Gbp7	C3	Asah2	Ckap2	Apod	A530013C23Rik
C130026L21Rik	Spag6	Gm11837	C330018A13Rik	Asb11	Clec7a	Apoe	A530053G22Rik
C1ql3	Tead2	Gm15564	C3ar1	Asb16	Clmn	Apol9a	A630001G21Rik
C1qtnf4	Tnc	Gm16299	C4b	Asb2	Col1a1	Arhgap20	A830008E24Rik
C1ra	Top2a	Gm24119	Cables1	Ass1	Col3a1	Arhgap25	A830082K12Rik
C230034O21Rik	Tpbg	Gm26448	Cacna2d4	Atp11a	Cort	Arhgap30	A930006I01Rik
Cabp7	Uhrf1	Gm33489	Calca	Atp2b4	Crhbp	Arhgap45	AA467197
Cacna1c	Unc5d	Gm40466	Car14	Atxn7l3b	Csf3r	Arl11	Aacs
Cacna1i	Zc3hav1	Gm43864	Car3	B230206H07Rik	Cst7	Arl4c	Aass
Cacng8	Zfp57	Gm45838	Car4	B230206L02Rik	Ctss	Arpc1b	AB124611
Calb1		Gm49375	Casq1	B230209E15Rik	Ctsz	Asl	Abca1
Casp1		Gm4951	Cbx7	B230312C02Rik	Cxcl10	Aspg	Abca6
Cast		Gm49980	Ccdc80	B230334C09Rik	Cxcl16	Ass1	Abca8a
Cbln2		Golga7b	Ccl3	B3galt5	Cyba	Asxl3	Abcb1b
Cbx7		Gpr17	Ccl6	B3gat1	Cybb	Atf3	Abcb7
Ccdc3		Gvin3	Ccnd2	B4galt2	Cyp11a1	Atic	Abcc3
Ccnd1		H2-D1	Cd109	Bag3	Cyp2e1	Atp1b2	Abcc4
Cd209a		H2-DMb1	Cd22	Baiap2	Dach2	Atp2b4	Abcd3
Cd248		H2-K1	Cd300c2	Batf3	Ddx60	Atp6v1g2	Abce1
Cd38		H2-M3	Cd33	BC035947	Depp1	Atxn7l3b	Abhd3
Cd93		H2-Q4	Cd37	Bcas1	Dmp1	AU020206	Abhd5
Cdh22		Hexb	Cd38	Bdkrb2	Dock2	Axl	Abi3
Cdh4		Hspa2	Cd48	Bglap3	Dpysl3	AY036118	Acad10
Cdhr3		Hvcn1	Cd52	Bhlhe22	Dpysl5	B2m	Acads
Cdk5r2		Hydin	Cd68	Bhlhe41	Draxin	Bbs9	Acap2
Cdk6		Ide	Cd84	Bmp2	Drd2	Bdh2	Acat2
Cdkl1		Ifi203	Cdca8	Bnc2	Dsc3	Bdkrb2	Acat3
Cebpd		Ifi204	Cdkn1c	Brinp2	Dtx3l	Bex1	Accs
Cend1		Ifi27	Cemip	Btaf1	Eif2ak2	Blnk	Ace2
Chmp4c		Ifi27l2a	Cers2	C030017B01Rik	ENSMUSG00000095041	Bpifb9a	Acer2
Chrm4		Ifih1	Chst3	C030029H02Rik	Eomes	Bpifb9b	Acox3
Chst1		Ifit1	Cilp	C130026L21Rik	Eya4	Bst2	Acsf2
Chst11		Ifit2	Ckm	C1galt1	Fam163a	Btaf1	Acsl1
Ciart		Ifit3	Cldn11	C1ra	Fcer1g	Btk	Acsl3
Cirbp		Ifit3b	Cldn19	C230034O21Rik	Fcgr1	Bub1b	Acsm5
Cmya5		Igtp	Clec3b	C2cd4c	Fcgr2b	C130089K02Rik	Acss2
Col1a1		Irf7	Clec7a	C330018A13Rik	Fcgr3	C1qa	Acta1
Col1a2		Irgm1	Clgn	C4b	Fermt1	C1qb	Actn1
Col2a1		Itga4	Cmtm5	Cabp7	Fgfbp3	C1qc	Actn3
Col3a1		Itgb2	Cnmd	Cacna2d1	Flnc	C1ra	Acvr1c
Col4a6		Itih3	Cnp	Cacng3	Fmo2	C1s1	Adam11
Col5a2		Itpr3	Coch	Cacng4	Ftl1	C230086J09Rik	Adam19
Colq		Kcnb1	Col14a1	Cadm2	Gadl1	C3	Adam8
Cplx1		Kcnb2	Col15a1	Calb1	Gbp3	C3ar1	Adamts1
Csmd2		Ky	Col1a1	Camk2n1	Gbp6	C4b	Adamts12
Cspg4		Lars2	Col1a2	Camk4	Gbx2	Cacna1e	Adamts2
CT009510.2		Lcn2	Col3a1	Camkk2	Gfap	Cacna1g	Adamts9
Cybrd1		Lgals1	Col4a1	Camkv	Ggta1	Cacng7	Adamtsl1
Cygb		Lgals3bp	Col4a3	Camta1	Gimap4	Calb2	Adamtsl4
Cyp11a1		Lsp1	Cpxm2	Car8	Gm11681	Calhm5	Adamtsl5
Cyyr1		Ly9	Crybg2	Casp1	Gm11749	Camkk2	Adap2
D430019H16Rik		Lyz2	Csf3r	Cast	Gm14569	Capg	Adcy2
D7Ertd443e		Mcm6	Cst7	Catspere2	Gm16299	Car9	Adcy7
Dach1		Mir6236	Ctse	Cbln2	Gm16505	Casp1	Adgb
Dact3		Mir670hg	Ctss	Cbx7	Gm16551	Casp12	Adgre1
Dbn1		Mkrn3	Ctsz	Ccdc148	Gm18529	Cbx4	Adgrg2
Dclk3		Mpeg1	Cyb5r2	Ccdc3	Gm34567	Cbx6	Adgrg6
Ddn		Mslnl	Cyba	Ccdc82	Gm3654	Cbx8	Adipor2
Deptor		Mx1	Cybb	Ccdc9b	Gm36757	Cc2d2a	Aebp1
Dio2		Mybl1	Cyp1b1	Ccnb1	Gm37161	Ccdc122	Aff1
Dlec1		Naalad2	Cyp2e1	Ccnd1	Gm37452	Ccdc3	Aff2
Dlgap3		Naip2	Cyp51	Cd200	Gm38340	Ccdc82	Ager
Dok3		Nbl1	Dcdc2a	Cd209a	Gm40466	Ccdc88b	Ago3
Dusp18		Ncan	Dennd1c	Cd22	Gm42047	Ccl3	Agpat2
Egr4		Necab3	Depdc1b	Cd24a	Gm42756	Ccl6	Agpat4
Eid2b		Nectin3	Depp1	Cd274	Gm45104	Ccn3	Agpat5
Eln		Neu2	Dhcr7	Cd36	Gm47860	Ccnd1	Agtr1a
Emid1		Nid1	Dmp1	Cd38	Gm48530	Cd109	Agtrap
Emilin1		Nlrc5	Dmrta1	Cd44	Gm49375	Cd180	Ahnak
Eng		Nr1h3	Dnah8	Cd55	Gm4951	Cd22	Ahsa1
Enox1		Nr3c2	Dock2	Cd84	Gnasas1	Cd274	Ahsa2
Entpd3		Nr6a1	Dpyd	Cdh11	Gpnmb	Cd300c2	AI197445
Epha3		Nrep	Dsp	Cdhr3	Gpr17	Cd33	AI506816
Epha6		Ntf3	Dtl	Cdk5r2	Gpr34	Cd37	Aif1
Epop		Nxph3	E230025N22Rik	Cdo1	Gpr84	Cd44	Aif1l
Erbin		Oas1a	Ecrg4	Cdr1os	Gvin3	Cd48	Aim2
Erich5		Oas1b	Eda2r	Cdr2l	Gvin-ps7	Cd52	Akap13
Esr1		Oasl2	Elf4	Cenpf	H19	Cd53	Akip1
Evpl		Olfr1372-ps1	Eln	Cerk	H2-D1	Cd68	Akna
Exd2		Ostn	Elovl1	Cfap206	H2-K1	Cd72	Akr1b8
Exoc3l4		Pamr1	Elovl7	Cfap46	H2-Ob	Cd74	Akr1c13
Ezh1		Parp12	Emilin2	Cfap61	H2-Q4	Cd84	Akr1c14
Fam171a2		Parp14	Emp2	Chd7	H2-Q6	Cd86	Alcam
Fam19a1		Parp4	Enpp1	Chl1	H3c2	Cda	Aldh1a1
Fat2		Parp9	Enpp2	Chmp4c	H3c3	Cdc14b	Aldh1a2
Fat3		Pcdha8	Enpp6	Chst11	Havcr2	Cdcp3	Aldh1a3
Fat4		Pcdhb11	ENSMUSG00000117733	Chst2	Hba-a1	Cdk16	Aldh1l2
Fbn2		Pcdhb14	Erich5	Chst8	Hba-a2	Cdkl1	Alms1-ps1
Fgfbp3		Pcdhb9	Etnppl	CK137956	Hbb-bs	Cdr1os	Alms1-ps2
Fhad1		Pcdhga3	Exoc3l2	Cmya5	Hbb-bt	Ceacam5	Alox5
Fjx1		Pcdhga4	Eya4	Cnksr3	Hck	Cenpw	Alox5ap
Flt1		Pcdhgb1	Fa2h	Cntn2	Hexb	Cep135	Amdhd2
Flt4		Pcdhgb6	Fabp7	Col1a1	Hgf	Cep70	Amer1
Flywch2		Pdlim3	Fam178b	Col1a2	Hmcn1	Cfh	Amot
Fmn1		Ppl	Fam83b	Col25a1	Hpse	Chchd7	Amotl1
Fn1		Prr16	Fbn2	Col2a1	Hvcn1	Chil1	Ampd3
Foxc1		Prr32	Fbxw23	Col3a1	Ide	Chrnb2	Amz1
Frzb		Psmb8	Fcer1g	Col4a3	Ifi204	Chst15	Ang
Fscn1		Ptk2b	Fcgr1	Col4a5	Ifi209	Chst3	Angptl1
Fstl4		Qprt	Fcgr2b	Col5a2	Ifi27	Cldn11	Ankdd1b
Fzd10		Rab20	Fcgr3	Colq	Ifi27l2a	Clec2l	Ankef1
Gad1		Rem2	Fcna	Coro6	Ifih1	Clec5a	Ankrd29
Galnt3		Rn18s-rs5	Fcrls	Cort	Ifit1	Clec7a	Ankrd33
Galnt6		Rnf213	Fdft1	Csf1r	Ifit3	Cmpk2	Ankrd34c
Gas2l1		Rorc	Fdps	Ctsz	Ifit3b	Cmtm7	Anks1b
Gatm		Rsad2	Fmo2	Ctxn1	Igfbpl1	Cmya5	Ano4
Gja5		Rtp4	Frem2	Cx3cl1	Ighm	Cntln	Ano6
Glp2r		Samd9l	Frk	Cx3cr1	Igtp	Cntnap1	Anxa11
Gm10095		Serpinb1b	Frmd7	Cyp11a1	Il33	Col1a1	Anxa2
Gm10754		Serpinb8	Fut2	Cyp26b1	Irf7	Col1a2	Anxa3
Gm10800		Serping1	Gal3st1	Cyp27a1	Irgm1	Col23a1	Anxa4
Gm11175		Six4	Galnt15	Cyp2e1	Itgax	Col3a1	Aoah
Gm13212		Slc38a5	Gamt	Cyp39a1	Itgb2	Col4a1	Aox1
Gm16083		Slc44a5	Gipr	Cyp46a1	Itgb5	Colq	Ap1g2
Gm16233		Slc6a20a	Gjc3	Cyp4f16	Kcnj5	Comp	Ap3m1
Gm16299		Slfn8	Glis3	Cyria	Kif11	Cracdl	Apbb1ip
Gm16505		Slfn9	Gm10635	Cyth1	Kif20a	Cracr2b	Apcdd1
Gm1673		Slitrk3	Gm11639	D430019H16Rik	Klk6	Creb3l1	Apln
Gm17092		Snca	Gm16233	D7Ertd443e	Lag3	Crebrf	Aplnr
Gm17322		Sqor	Gm18529	D930019O06Rik	Lars2	Csf1r	Apobec1
Gm18529		Sv2c	Gm20162	Dab2	Lat2	Csf2rb	Apobec2
Gm18783		Syde1	Gm2115	Dach1	Lef1	Csf3r	Apobec3
Gm19500		Synpr	Gm21188	Dach2	Lgals3	Csmd1	Apobr
Gm21887		Tap2	Gm28320	Dact1	Lgals3bp	Csmd3	Apoc1
Gm22422		Tcap	Gm28756	Dbpht2	Lilrb4a	Cst6	Apod
Gm26782		Them4	Gm2991	Dcc	Liph	Cst7	Apoe
Gm26901		Tnc	Gm31135	Dclk3	Lsp1	Ctsc	Apol9a
Gm35161		Tnfrsf12a	Gm32122	Ddn	Luzp2	Ctsd	Apol9b
Gm40331		Tor3a	Gm36356	Depdc7	Ly6g6f	Ctsh	Appl2
Gm40466		Trank1	Gm3654	Dgka	Ly86	Ctss	Aqp4
Gm42517		Trem2	Gm36823	Dgkb	Ly9	Ctsz	Aqp6
Gm42756		Trim12a	Gm37111	Dhcr24	Lyz2	Ctxn2	Arap1
Gm43210		Trim25	Gm37452	Dio2	Mfsd7a	Cx3cr1	Arap3
Gm43398		Trim30a	Gm37460	Dleu7	Mgst1	Cxcl10	Arhgap11a
Gm43566		Trim30d	Gm38340	Dlg2	Mir6236	Cxcl16	Arhgap15
Gm44441		Trim34a	Gm39473	Dlg4	Mki67	Cyb5r3	Arhgap20
Gm44644		Ttyh3	Gm40466	Dlx1	Mlph	Cyba	Arhgap22
Gm48488		Tunar	Gm4221	Dmkn	Mmp12	Cybb	Arhgap25
Gm48530		Tyrobp	Gm42528	Dmp1	Mmp15	Cyp1b1	Arhgap28
Gm4900		Ube2cbp	Gm42756	Doc2b	Mmp19	Cyp2d22	Arhgap29
Gm5546		Ugt8a	Gm42928	Dock5	Mpeg1	Cyp2f2	Arhgap30
Gm765		Unc93b1	Gm43089	Dok6	mt-Co3	Cyth4	Arhgap35
Gm9954		Usp18	Gm44421	Dpysl3	Mx1	D430041D05Rik	Arhgap36
Gm996		Utrn	Gm48678	Dsel	Myo1f	Dagla	Arhgap4
Golga7b		Vgf	Gm48697	Dusp18	Naaa	Dapp1	Arhgap45
Gpc6		Zc3hav1	Gm48898	Dyrk2	Naalad2	Dcbld1	Arhgap9
Gpr17		Zfp57	Gm49375	E230020A03Rik	Naip2	Dcn	Arhgdib
Gpr25			Gm4951	E2f3	Naip5	Ddr2	Arhgef37
Gpr26			Gm49767	E530001F21Rik	Nckap1l	Ddx25	Arid5a
Gpr37			Gm5086	Ebf2	Nid1	Ddx58	Arl11
Gprasp2			Gm5697	Echdc2	Nlrc5	Ddx60	Arl15
Grasp			Gm597	Eda	Nlrp5-ps	Depp1	Arl5c
Grb10			Gm7696	Efcab5	Oas1a	Dhx58	Arl6
Grb14			Gnb4	Efnb3	Oas2	Doc2b	Armc3
Grid2ip			Golga7	Ehbp1l1	Oasl2	Dock2	Arnt2
Grin2b			Gpnmb	Emid1	Ogn	Dock8	Arpc1b
Grin2c			Gpr17	Emilin2	Olfr1372-ps1	Dpyd	Arrdc1
Grrp1			Gpr84	Emp2	Osmr	Dpysl4	Arrdc3
Gstt1			Gsn	ENSMUSG00000095041	Parp14	Dsc2	Arsb
H2afx			Gstm1	Entpd3	Pbk	Dsp	Art4
H2-K2			Gvin3	Epb41	Pcdhb1	Dtx3l	Arxes1
H2-T22			H2-D1	Epha3	Pcdhb11	E230020A03Rik	Arxes2
Hapln2			H2-DMb1	Epha6	Pcdhb12	E230025N22Rik	Asb2
Hcn4			H2-Ob	Erbin	Pcdhb13	E2f3	Asgr1
Hist1h2ab			H2-Q5	Erich5	Pcdhb14	Eaf2	Aspg
Hist1h3a			H2-Q6	Ermn	Pcdhb2	Eef1a1-ps1	Aspn
Hist1h3d			Havcr2	Espn	Pcdhb3	Efemp1	Ass1
Hist1h3e			Hbb-bs	Esr1	Pcdhb4	Egr1	Asxl3
Hist1h3f			Hcar2	Esyt1	Pcdhb5	Egr4	Atf3
Hist1h3h			Hck	Etnppl	Pcdhb6	Eif2ak2	Atf5
Hist1h4d			Hhip	Evpl	Pcdhb8	Elf2	Atoh8
Hpcal4			Hk2	Exd2	Pcdhb9	Emid1	Atp10b
Hr			Hmcn1	Exoc3l4	Pcdhga2	Eml1	Atp11a
Hrh3			Hmgcr	Exoc6	Phf11b	ENSMUSG00000095041	Atp13a5
Hrk			Hmgcs1	F2r	Phf11d	Epb41l1	Atp1a2
Hspg2			Hmgcs2	F630028O10Rik	Pirb	Epn3	Atp2a1
Htr2a			Hsd17b7	F630042J09Rik	Pla1a	Epsti1	Atp6v0a4
Icam5			Hspa1b	Fads6	Pld4	Erap1	Atp6v0d2
Ide			Hvcn1	Fam102b	Plek	Erbb4	Atp8b4
Ifi27			Icosl	Fam107b	Plscr1	Erc1	Atp8b5
Igf2			Id2	Fam184b	Plscr2	Ercc6l2	Atxn7l3b
Igfbp7			Idh1	Fat2	Prc1	Ergic1	AU020206
Ighg2c			Idi1	Fat3	Pros1	Etnppl	AU022793
Igsf3			Ifi204	Fat4	Prss50	Ets2	AW112010
Il1r1			Ifi30	Fbln2	Psmb8	Etv4	Axl
Il33			Igf1	Fbn2	Psmb9	Eva1c	B230206H07Rik
Impact			Igf1r	Fbxl16	Ptgs1	Exoc3l4	B230209E15Rik
Impg2			Igf2bp2	Fbxw23	Ptpn6	Eya4	B230334C09Rik
Inhba			Igfbp4	Fcrls	Ptprc	Ezr	B2m
Itga1			Igfbp7	Fermt1	Ptpro	F830016B08Rik	B3galt1
Itih3			Igkc	Fgf10	Pycard	Fa2h	B430306N03Rik
Jak3			Igkv4-55	Fgf13	Rad21l	Fabp7	B4galt1
Jph4			Igsf1	Fgfbp3	Rassf10	Fads2	Baalc
Jund			Igsf6	Fhl5	Rgs16	Fam111a	Bace1
Kazald1			Ikzf1	Fibcd1	Rn18s-rs5	Fam131a	Barx2
Kcnab1			Il31ra	Flt3	Rnf213	Fam163b	Batf2
Kcnj12			Ildr1	Fmn1	Rrm2	Fam169a	Bbln
Kcnk12			Insig1	Fnbp1	Rtp4	Fam184b	Bbox1
Kcnq4			Irf5	Fnbp1l	S100a6	Fam221a	BC024139
Kif11			Irf8	Frzb	S100b	Fam78b	BC039966
Klhl1			Itgax	Fscn1	Samd9l	Fbln5	BC051142
Klhl33			Itgb2	Fstl5	Scn7a	Fbxo41	Bcap31
Ky			Itgb5	Fzd10	Serpina3n	Fcer1g	Bche
L3mbtl3			Itih3	Fzd10os	Serpine1	Fcgr2b	Bcl2
Lama4			Itm2a	Fzd8	Serpinf2	Fcgr3	Bcl2a1a
Lcn2			Jade2	Gabrb3	Sh3d19	Fermt3	Bcl2a1b
Lhfpl5			Jchain	Gal3st3	Shc3	Fes	Bcl2a1d
Lin28b			Jpt2	Galnt16	Shisal1	Fgd2	Bcl3
Lingo2			Kcne1l	Galnt3	Skap2	Fgf11	Bcl6
Lingo3			Kcnk6	Galnt6	Slamf9	Fgf2	Bdkrb2
Lrp4			Kcnq1	Gap43	Slc11a1	Fgfbp3	Bgn
Lrrc3			Kctd5	Gatm	Slc14a1	Flnc	Bhlhe41
Lsm11			Kdelr3	Gbp11	Slc27a3	Fmn1	Bicd1
Map3k10			Kif19a	Gda	Slfn8	Fmo2	Bid
Map7d2			Kirrel3	Gipc3	Sncaip	Ftl1	Bik
Marcks			Kit	Gja5	Sox11	Fut10	Bin2
Marcksl1			Klf15	Gjb1	Spag6	Fyb	Birc3
Mdga1			Klk6	Glp2r	Spp1	Gabbr1	Blnk
Megf11			Ky	Glra3	Tap1	Gabbr2	Bmp2
Met			Lag3	Gm10800	Tbc1d16	Gabra2	Bmp2k
Mgat4b			Lamb1	Gm12371	Tcf7l2	Galnt9	Bmp4
Mmp14			Laptm5	Gm12576	Tead2	Garem2	Bri3
Mmp15			Lcat	Gm13629	Tex11	Gask1b	Brinp1
Mocs3			Lck	Gm14824	Tfcp2l1	Gbp10	Brinp3
Mrc1			Ldlr	Gm15663	Tgm1	Gbp11	Brwd3
Myh11			Lgals3	Gm15991	Timp1	Gbp2	Bst2
Myh14			Lgals3bp	Gm16070	Tlr1	Gbp3	Btaf1
Mylk			Lilrb4b	Gm16083	Tlr13	Gbp6	Btbd16
Nap1l2			Lims2	Gm16233	Tlr2	Gbp7	Btbd17
Nap1l5			Lmo7	Gm16299	Tlr4	Gbp9	Btbd19
Nbl1			Lox	Gm16505	Tmc3	Gdf11	Btk
Ncan			Lpar4	Gm17322	Tmem163	Gfap	Btn2a2
Nectin3			Lpar5	Gm18529	Tmem176a	Glipr1	C030029H02Rik
Nectin4			Lpl	Gm18783	Tmem267	Gm10530	C030034L19Rik
Nefh			Lpo	Gm18786	Tnc	Gm11681	C1galt1c1
Nid1			Lrrc3	Gm19035	Top2a	Gm12122	C1qa
Nlrc3			Lrrc55	Gm19500	Trdn	Gm12250	C1qb
Nlrp5-ps			Lsp1	Gm20063	Trem2	Gm14636	C1qc
Nog			Lss	Gm20162	Treml2	Gm14964	C1ql1
Nol4			Ly9	Gm21984	Trf	Gm15564	C1qtnf2
Notch3			Lyz2	Gm26244	Trim21	Gm16299	C1ra
Notch4			Maff	Gm26673	Trim30a	Gm16425	C1rl
Nova1			Mag	Gm26703	Trim30d	Gm16701	C1s1
Nptxr			Mal	Gm30085	Trp73	Gm18150	C3
Nr1d1			Man2b1	Gm30371	Txlnb	Gm19035	C330018A13Rik
Nr2f6			Marcksl1	Gm32444	Tyrobp	Gm20162	C3ar1
Nr3c2			Masp1	Gm33869	Uhrf1	Gm20276	C430049B03Rik
Nrsn2			Matn3	Gm34776	Unc5d	Gm20559	C4b
Nrxn2			Mc5r	Gm35161	Upk1b	Gm20778	C530044C16Rik
Nwd2			Met	Gm36855	Usp18	Gm24119	C5ar1
Obox3-ps7			Mettl7a1	Gm3693	Vangl1	Gm24401	C5ar2
Olfml3			Mfap4	Gm37056	Vim	Gm25776	C630043F03Rik
Olfr316			Mfap5	Gm37452	Vipr2	Gm2629	C77080
Olfr878			Mfsd7a	Gm37827	Vmn1r90	Gm26397	C920009B18Rik
Palld			Mlph	Gm38340	Vwa5a	Gm26448	Cabp7
Pcdh15			Mmp2	Gm38642	Wdfy4	Gm26797	Cacna2d4
Pcdh8			Mog	Gm40331	Wfdc17	Gm32618	Cacybp
Pcdhb11			Mpeg1	Gm40466	Xaf1	Gm3294	Calca
Pcdhb12			Mpz	Gm41804	Zc3hav1	Gm3325	Calhm2
Pcdhb13			Msmo1	Gm42503	Zfp57	Gm35040	Calml4
Pcdhb14			Mug1	Gm42692	Zim2	Gm35101	Caln1
Pcdhb2			Mug2	Gm42756		Gm3604	Calr
Pcdhb3			Mvd	Gm42864		Gm36858	Calr4
Pcdhb4			Myh4	Gm43210		Gm37735	Camk1
Pcdhb5			Myl1	Gm43242		Gm37753	Camk4
Pcdhb6			Mylpf	Gm43305		Gm37769	Capg
Pcdhb8			Myo1f	Gm43398		Gm38101	Capn3
Pcdhb9			Myo3a	Gm44171		Gm3912	Capn6
Pcdhga2			Myoc	Gm44644		Gm39465	Car3
Pcdhga6			Naalad2	Gm45104		Gm40466	Car4
Pcdhga8			Naip2	Gm45426		Gm42722	Car5b
Pcdhgc5			Naip5	Gm45441		Gm42769	Car8
Pcp4l1			Ncan	Gm46400		Gm43140	Card11
Pcsk1n			Ncf1	Gm46620		Gm43197	Card6
Pcsk6			Nckap1l	Gm47461		Gm43230	Card9
Pde3a			Ncmap	Gm4777		Gm43305	Casp1
Pex6			Neb	Gm48519		Gm43864	Casp12
Pgls			Nfam1	Gm48530		Gm44763	Casp4
Pglyrp1			Ngp	Gm4900		Gm45838	Casp8
Pink1			Nid1	Gm49375		Gm46404	Casq1
Pla2g16			Nlrp5-ps	Gm49512		Gm48678	Catip
Plekhb1			Nras	Gm49593		Gm4951	Cav2
Plekhg4			Nrep	Gm49745		Gm49555	Cbx7
Plppr2			Nsdhl	Gm49949		Gm5086	Ccdc160
Plppr4			Obox3-ps7	Gm5546		Gm5141	Ccdc190
Pls1			Olfm4	Gm6089		Gm536	Ccdc80
Plxdc1			Olfr111	Gm7745		Gm5431	Ccdc88b
Pnck			Olfr1372-ps1	Gm7967		Gm6277	Ccdc9
Pnkd			Olfr558	Gm9946		Gm6548	Cchcr1
Postn			Opalin	Gm9954		Gm7240	Ccl11
Ppfibp1			Pacs2	Gnaz		Gm973	Ccl12
Ppl			Pcdh12	Gnb4		Gna15	Ccl2
Ppp1r7			Pcdhb1	Gpc6		Gnb4	Ccl3
Prex1			Pcdhb10	Gpd2		Gng12	Ccl4
Prkg2			Pcdhb11	Gpld1		Gngt2	Ccl5
Prmt8			Pcdhb12	Gpnmb		Golga7b	Ccl6
Proca1			Pcdhb13	Gpr17		Gpnmb	Ccl8
Prox1			Pcdhb14	Gpr26		Gpr17	Ccn1
Prr7			Pcdhb2	Gpr27		Gpr183	Ccn3
Prrg1			Pcdhb3	Gpr37		Gpr34	Ccn5
Prune2			Pcdhb4	Gpr88		Gpr84	Ccnd1
Ptgfrn			Pcdhb5	Gprin1		Gprc5b	Ccnd2
Ptprf			Pcdhb6	Gprin3		Gpx3	Ccnd3
Ptprj			Pcdhb8	Grem2		Grb10	Ccne1
Ptprk			Pcdhb9	Grid2ip		Grm4	Ccnjl
Ptpro			Pcdhga1	Grin2b		Gsdmd	Ccp110
Rab37			Pcdhga2	Grm5		Gusb	Ccr2
Rab7b			Pcdhga6	Gucy1a2		Gvin3	Cd101
Rasgrf1			Pcdhga7	H1f3		Gvin-ps7	Cd109
Rbm3			Pcdhgb2	H2bc3		H1f5	Cd14
Resp18			Pcdhgc4	H2-D1		H2-Aa	Cd180
Rfx3			Pcolce	H2-K1		H2-Ab1	Cd200r1
Rgs5			Pdcd1	H2-K2		H2-D1	Cd200r4
Rimklb			Per2	H2-Q4		H2-DMb1	Cd209f
Rin1			Pgam2	H2-T22		H2-K1	Cd22
Rit2			Pi15	Hapln1		H2-M3	Cd244a
Rnf122			Pigz	Hapln2		H2-Ob	Cd248
Rnpep			Pik3r5	Hcn4		H2-Q4	Cd274
Robo3			Pirb	Hdac9		H2-Q6	Cd300a
Robo4			Pla2g4a	Hes5		H2-Q7	Cd300c2
Rpe65			Plat	Hjurp		H2-T10	Cd300lb
Rps6ka5			Plcb2	Hkdc1		H2-T22	Cd300ld
Rtn4rl2			Plcg2	Homer2		H2-T23	Cd300lf
Rxra			Plek	Hpcal1		H2-T24	Cd33
Sall2			Plekha1	Hpcal4		H4c11	Cd34
Scand1			Plekhh2	Hpgd		Haus4	Cd37
Scn4b			Plin4	Hrh1		Havcr2	Cd38
Scn9a			Pllp	Hrk		Hba-a1	Cd3e
Scube1			Plp1	Hs3st3a1		Hba-a2	Cd44
Sema6b			Pmaip1	Hsf4		Hbb-bs	Cd48
Sept4			Pmp22	Htr1d		Hbb-bt	Cd52
Sertm1			Pnpla7	Htr2a		Hbegf	Cd53
Sfmbt2			Postn	Hydin		Hck	Cd55
Sh2d4b			Ppl	Icam5		Hcls1	Cd63
Shank2			Pqlc3	Ide		Hdgfl3	Cd68
Skap2			Prkag3	Ifi27		Hectd2	Cd72
Slc29a4			Prkcq	Ifit3		Helb	Cd80
Slc38a5			Prom2	Igfbp2		Herc6	Cd84
Slc4a7			Prr18	Igsf3		Hes6	Cd86
Slc5a5			Prx	Igtp		Hexa	Cd8a
Slc8a3			Ptn	Il17rd		Hexb	Cd9
Slco1b2			Ptpn13	Il33		Hjurp	Cd93
Slit2			Ptpn6	Inpp5k		Hk3	Cd99l2
Smyd1			Ptprc	Insyn2b		Hmgb2	Cdadc1
Smyd3			Ptpro	Ints6l		Hpgds	Cdc42bpg
Sowaha			Pycr1	Itgb4		Hpse	Cdh1
Sox11			Rab7b	Itih3		Hs3st5	Cdh10
Sox4			Rap1a	Itpka		Hs6st3	Cdh11
Spaar			Rasal3	Jph4		Hsd17b11	Cdh18
Spef2			Rassf10	Kazald1		Hspa2	Cdh20
Spi1			Rbm3	Kcnab2		Htr1b	Cdh5
Spink10			Rhoh	Kcnab3		Hvcn1	Cdh6
St18			Ripk4	Kcnf1		Icosl	Cdh7
St8sia5			Rnf122	Kcng1		Id2	Cdhr2
Stab1			Rorc	Kcnj12		Ide	Cdk5rap2
Stac2			Rras2	Kcnj16		Ifi203	Cdk5rap3
Stard4			Runx1	Kcnmb4		Ifi204	Cdk6
Susd2			S100a8	Kcnn3		Ifi206	Cdk9
Syt13			S100a9	Kcnq4		Ifi207	Cdkl5
Syt2			Sall4	Kif11		Ifi208	Cdkn1c
Sytl1			Sbspon	Kif19a		Ifi209	Cdkn2a
Tceal6			Sc5d	Kifc2		Ifi211	Cdkn2b
Thbs1			Scnn1a	Kirrel2		Ifi213	Cdon
Tie1			Secisbp2l	Kirrel3		Ifi27	Cdr2
Tle3			Sema5a	Klf16		Ifi27l2a	Cdsn
Tmem132a			Serinc5	Klhdc7b		Ifi35	Cebpa
Tmem158			Serpina3n	Klhl1		Ifi44	Cebpb
Tmem198			Serpinh1	Klhl2		Ifi47	Cebpd
Tmem200c			Sgk2	Klhl33		Ifih1	Cela1
Tmem259			Sh3gl3	Klhl5		Ifit1	Cemip
Tnc			Shisa4	Kndc1		Ifit1bl2	Cenpo
Tnnt2			Slamf6	Ksr1		Ifit2	Cep170
Top2a			Slamf9	Lamb1		Ifit3	Cep83
Trim59			Slc11a1	Large1		Ifit3b	Cept1
Tshz2			Slc16a4	Lars2		Ifitm3	Cercam
Ube2d2a			Slc22a18	Lct		Igsf10	Cerox1
Unc13b			Slc25a48	Lgals3bp		Igsf21	Cers2
unnamed_miRNA			Slc30a10	Lgals8		Igsf6	Cfap126
Usp29			Slc34a3	Lin28b		Igsf9b	Cflar
Vamp1			Slc35b2	Lingo2		Igtp	Cftr
Vgf			Slc37a2	Lix1		Iigp1	Cgas
Vmn1r90			Slc38a3	Lpin1		Ikzf1	Ch25h
Vmn2r84			Slc38a5	Lpl		Il1a	Chat
Vmn2r85			Slc4a1	Lrfn5		Il20rb	Chchd3
Vstm2l			Slc7a10	Lrmda		Il21r	Chil1
Vwa5b1			Slc9b2	Lrp4		Il22b	Chn1
Wbp2			Smyd1	Lrrc10b		Inka2	Chn2
Wfs1			Spag6	Lrrc3		Inpp5d	Chodl
Wscd2			Spink10	Lrrc7		Iqgap2	Chordc1
Wwox			Sqle	Lrrtm1		Irag2	Chrm2
Zbbx			Srd5a1	Lrrtm4		Irf1	Chrm3
Zc3hav1			Sros1	Lsm11		Irf5	Chst3
Zdhhc14			Stard4	Lsp1		Irf6	Chsy3
Zfp428			Stat6	Ly9		Irf7	Cidea
Zfp575			Stra6	Lypd1		Irf8	Cilk1
Zfp579			Synpo2	Macroh2a2		Irf9	Cilp
Zfp580			Sypl	Man1a		Irgm1	Cilp2
Zfp771			Sytl2	Man1a2		Irgm2	Cirbp
Zfp804b			Tdgf1	Map7		Isg15	Cklf
			Tek	Marchf1		Itgam	Ckm
			Tent5c	Marchf4		Itgav	Clasp2
			Tex11	Marcks		Itgax	Clcf1
			Tfcp2l1	Marcksl1		Itgb2	Clcn5
			Tfrc	Mboat1		Itgb5	Cldn10
			Ticam2	Mdfic2		Itgb7	Cldn11
			Tll2	Mdga1		Itih3	Cldn19
			Tmc3	Megf10		Itm2a	Clec12a
			Tmeff2	Meis1		Itm2c	Clec3b
			Tmem117	Meis2		Itpka	Clec4a3
			Tmem119	Met		Itpr3	Clec5a
			Tmem254	Mir384		Itsn2	Clec7a
			Tmem97	Mmd		Jade1	Clgn
			Tnc	Mme		Jarid2	Clic1
			Tnfaip2	Mobp		Kazn	Clic5
			Tnfrsf13c	Mr1		Kcna1	Cln3
			Tnfrsf22	Mrc1		Kcna2	Cln6
			Tnfsf8	Mroh1		Kcnb1	Clvs1
			Tnnt3	mt-Tp		Kcnb2	Cmklr1
			Tnr	Mybpc1		Kcnc3	Cmpk1
			Traf3ip3	Myh14		Kcnh1	Cmtm3
			Trem2	Myh2		Kcnj10	Cmtm5
			Treml2	Myh7		Kcnj11	Cmtm6
			Trim30d	Myo5c		Kcnj6	Cmtm7
			Tspan15	Myod1		Kcnk3	Cndp2
			Tspan2	Myrf		Kcnk6	Cnmd
			Ttn	Nbl1		Kcnq2	Cnn3
			Tyrobp	Ncam1		Kctd12	Cnp
			Ugt8a	Ncan		Kctd8	Cnr2
			Uts2b	Neat1		Kif16b	Cntn6
			Vamp3	Necab2		Kiz	Cntnap5a
			Vdac3-ps1	Nectin3		Klf13	Cntnap5b
			Vim	Nectin4		Klf6	Cntnap5c
			Vmn1r90	Nefh		Kndc1	Coch
			Vstm4	Negr1		Ky	Col14a1
			Vwa3b	Nek10		Lag3	Col15a1
			Was	Nell2		Lair1	Col16a1
			Wfdc17	Neurl1b		Lamp2	Col19a1
			Wnt10b	Neurod4		Laptm5	Col1a1
			Xdh	Nid1		Lars2	Col1a2
			Zbtb42	Nipal2		Layn	Col25a1
			Zc3hav1	Nkain3		Lcp1	Col27a1
			Zdhhc15	Nkx6-2		Lcp2	Col2a1
			Zdhhc2	Nlrc5		Ldlrap1	Col3a1
			Zdhhc9	Nlrp5-ps		Lgals1	Col4a1
			Zfp488	Nol4		Lgals3	Col4a3
			Zfp831	Nova1		Lgals3bp	Col5a3
				Nptx2		Lgals9	Col6a1
				Nptxr		Lgr5	Col6a2
				Nr1d1		Lhfpl4	Col8a1
				Nrep		Lilrb4a	Col8a2
				Nrm		Lilrb4b	Colgalt1
				Nrn1		Lingo1	Coq8b
				Nrsn2		Lingo3	Coro1a
				Ntn5		Lpcat2	Cotl1
				Nwd2		Lpl	Cox20
				Oas1b		Lrguk	Cox6b2
				Obox3-ps7		Lrrc3b	Cped1
				Olfm1		Lsp1	Cpne2
				Olfm2		Ltbp1	Cpne3
				Olfml3		Ly86	Cpxm2
				Olfr111		Ly9	Crabp2
				Olfr1372-ps1		Lyl1	Cracr2b
				Olfr316		Lyz2	Crb2
				Osbpl7		Lzts1	Creg1
				Otof		Mal	Crip1
				Otogl		Maml3	Crispld2
				Oxtr		Man2b1	Crlf1
				P2rx6		Maneal	Crlf2
				Pak6		Maob	Cryab
				Pappa2		Maz	Crybg1
				Parp12		Mcm6	Crybg2
				Parp4		Mdfi	Crym
				Pcdh11x		Mdfic	Cryzl2
				Pcdh19		Mdga1	Csf1
				Pcdh8		Met	Csf1r
				Pcdhb10		Mfsd2a	Csf2ra
				Pcdhb11		Mfsd4a	Csf2rb
				Pcdhb12		Mgp	Csf2rb2
				Pcdhb13		Milr1	Csf3r
				Pcdhb14		Mir6236	Cspg4b
				Pcdhb2		Mir670hg	Csrnp3
				Pcdhb3		Mkrn3	Cst7
				Pcdhb4		Mmp12	Ctdsp2
				Pcdhb5		Mmp15	Ctf1
				Pcdhb6		Mmp16	Cthrc1
				Pcdhb7		Mmp19	Ctnnbip1
				Pcdhb8		Mndal	Ctsa
				Pcdhb9		Mocos	Ctsb
				Pcdhga10		Mog	Ctsc
				Pcdhga2		Mpeg1	Ctsd
				Pcdhga4		Mpzl2	Ctse
				Pcdhga6		Ms4a6b	Ctsh
				Pcdhga7		Ms4a6c	Ctsk
				Pcdhga8		Ms4a6d	Ctsl
				Pcdhga9		Ms4a7	Ctss
				Pcdhgb4		Mslnl	Ctsz
				Pcdhgb5		Msrb3	Cttnbp2nl
				Pcdhgb6		mt-Cytb	Cul2
				Pcdhgb7		Mthfd1l	Cx3cr1
				Pcdhgb8		mt-Nd1	Cxadr
				Pcdhgc5		mt-Nd2	Cxcl10
				Pcolce2		mt-Nd4	Cxcl13
				Pcp4l1		mt-Tm	Cxcl16
				Pcsk6		mt-Tt	Cxcr4
				Pde3a		Mx1	Cxxc4
				Pde8a		Mx2	Cyb5r2
				Pdgfc		Mxra7	Cyb5r3
				Pdgfra		Mxra8	Cyba
				Pdzrn4		Mybl1	Cybb
				Peg3		Myo1f	Cyp1b1
				Per3		Myo1g	Cyp21a2-ps
				Pgm2l1		Myof	Cyp26b1
				Plaat3		Naalad2	Cyp2c52-ps
				Plekha2		Nab2	Cyp2d22
				Plekha4		Naip2	Cyp2e1
				Plekhh1		Naip5	Cyp2j12
				Plekhh2		Naip6	Cyp4f14
				Plk4		Nav3	Cyp4f18
				Plk5		Nbl1	Cyp4v3
				Plppr1		Ncf1	Cyp51
				Plppr2		Ncf2	Cyp7b1
				Plppr4		Nckap1l	Cyth4
				Plppr5		Ncor2	Cytip
				Pls1		Necab1	D430019H16Rik
				Plxdc1		Necab3	D430041D05Rik
				Plxdc2		Nectin3	D930020B18Rik
				Plxnb3		Nectin4	Daglb
				Pnkd		Neu2	Dao
				Postn		Nfe2l2	Dap
				Ppl		Nfic	Dapl1
				Ppp1r3g		Nid1	Dbpht2
				Ppp2r2c		Nlgn2	Dcc
				Prkar2b		Nlrc5	Dcdc2a
				Proca1		Nlrp1c-ps	Dctn3
				Prox1		Nlrp5-ps	Ddr2
				Prrg1		Nmi	Ddx21
				Prss22		Nod2	Ddx58
				Psg16		Nol3	Ddx60
				Ptgfrn		Nova2	Defb1
				Ptgs2os2		Npc2	Dennd11
				Ptn		Nptxr	Dennd1c
				Ptprf		Nr1h3	Dennd2c
				Ptprh		Nr3c2	Dennd2d
				Ptpro		Nr6a1	Depdc1b
				Pxk		Nrep	Depp1
				Rab37		Nt5dc3	Des
				Radx		Ntf3	Desi1
				Ramp3		Nupr1	Dgkk
				Rap1b		Nxph3	Dgkz
				Rap2a		Oas1a	Dhcr24
				Rap2b		Oas1b	Dhcr7
				Rasa4		Oas1c	Dhdh
				Rasal1		Oas1g	Dhrs1
				Rasgef1a		Oas2	Dhrs13os
				Rasgrf1		Oasl1	Dhrs3
				Rasl10a		Oasl2	Dhx34
				Rbm3		Olfr1372-ps1	Dhx58
				Rbp4		Ostn	Diaph1
				Rcn1		Otulinl	Dio2
				Rem2		P2ry13	Disc1
				Ret		P2ry6	Dkk2
				Rffl		Pamr1	Dmp1
				Rflnb		Papss2	Dmrta1
				Rfx3		Parp10	Dna2
				Rgs14		Parp12	Dnaaf3
				Rgs20		Parp14	Dnah3
				Rgs4		Parp3	Dnah6
				Rimklb		Parp4	Dnaja1
				Riox2		Parp9	Dnajb11
				Ripor2		Parvg	Dnajc6
				Rn18s-rs5		Pcdh12	Dnase1l1
				Rn7s1		Pcdha10	Dnase2a
				Rnf180		Pcdha11	Dnm2
				Rnf207		Pcdha5	Dock1
				Rnf213		Pcdha6	Dock10
				Robo1		Pcdha7	Dock2
				Rps6ka5		Pcdha8	Dock5
				Rreb1		Pcdha9	Dock7
				Rsph4a		Pcdhb11	Dock8
				Rxra		Pcdhb12	Dok1
				Rxrg		Pcdhb13	Dpp10
				S1pr5		Pcdhb14	Dpp4
				Scml4		Pcdhb2	Dpt
				Scn10a		Pcdhb6	Dpyd
				Scn1b		Pcdhb8	Dpysl3
				Scn3a		Pcdhb9	Dsp
				Scn3b		Pcdhga3	Dtx3l
				Scn4b		Pcdhga4	Dynll1
				Scn9a		Pcdhga6	Dynlrb1
				Scube2		Pcdhga8	E030042O20Rik
				Sec1		Pcdhga9	E130102H24Rik
				Sec14l5		Pcdhgb1	E130308A19Rik
				Sema3f		Pcdhgb6	E230020A03Rik
				Septin4		Pdk1	E230025N22Rik
				Serpina3n		Pdlim3	E230029C05Rik
				Serpinf1		Peg10	Ebi3
				Sertm1		Penk	Ebp
				Sfmbt2		Phf11b	Echdc1
				Sgpp2		Phf11d	Echdc3
				Sh2d4b		Phldb2	Ecm1
				Sh3bp4		Pik3ap1	Ecm2
				Shisa9		Pik3cg	Ecrg4
				Shroom2		Pirb	Eda2r
				Six4		Plag1	Edem1
				Skap2		Platr25	Edem2
				Slc16a2		Plau	Edn1
				Slc16a7		Plcb2	Eef2k
				Slc1a3		Plcg2	Efemp2
				Slc25a13		Pld4	Efhd2
				Slc27a2		Plek	Efnb2
				Slc29a4		Plp1	Efr3b
				Slc30a10		Plppr4	Egfem1
				Slc38a4		Plscr2	Egr2
				Slc4a7		Plxnc1	Ehbp1l1
				Slc8a3		Plxnd1	Ehd2
				Slco1b2		Postn	Ehd4
				Slit2		Ppl	Ehmt2
				Smad9		Ppm1e	Eif2ak2
				Smarca1		Ppp1r14c	Eif4b
				Smarca5-ps		Ppp2r2c	Eif4ebp1
				Smyd1		Pqlc3	Elavl2
				Smyd3		Prdm6	Elf4
				Snca		Prg4	Elk3
				Snx22		Prokr2	Elmod1
				Socs2		Pros1	Elovl1
				Sorbs3		Prr14l	Elovl2
				Sowaha		Prr16	Elovl4
				Sox10		Prr18	Elovl5
				Sox11		Prrg3	Elovl6
				Sox2ot		Psg29	Elovl7
				Sox4		Psmb10	Emb
				Sparc		Psmb8	Emc2
				Spata2l		Psmb9	Emilin2
				Spef2		Psme1	Eml1
				Spink10		Ptafr	Eml2
				Sprn		Ptchd4	Eml3
				Sptbn2		Ptk2b	Emp1
				St14		Ptpn6	Emp2
				St18		Ptprc	Emp3
				St8sia2		Pycard	Eno4
				St8sia5		Pygl	Enoph1
				Stac2		Qprt	Enpp1
				Stat4		Rab20	Enpp2
				Stat6		Rab32	Enpp3
				Steap3		Rac2	Enpp6
				Stox1		Rad51ap2	ENSMUSG00000085423
				Stum		Ramp3	ENSMUSG00000095041
				Stx1a		Ranbp3l	ENSMUSG00000117733
				Stxbp2		Rap2a	Entpd1
				Sun2		Rara	Epha1
				Susd5		Rasal1	Epha3
				Sv2c		Rasal3	Epha5
				Syde1		Rassf9	Epha7
				Syde2		Reep2	Ephx1
				Syt16		Rem2	Epop
				Syt17		Rgs16	Epsti1
				Syt2		Rhoh	Erbb2
				Syt9		Rims3	Erbb3
				Sytl1		Rims4	Erbin
				Tafa1		Rin2	Erg28
				Tamalin		Rn18s-rs5	Erich5
				Tanc1		Rnase4	Erich6
				Tap1		Rnf213	Erlin2
				Tap2		Robo1	Ermard
				Tbkbp1		Rorc	Ermn
				Tbx22		Rpl14	Errfi1
				Tex9		Rpl21	Espl1
				Tgfbr1		Rpl32	Espn
				Tiam2		Rprml	Etnppl
				Tll1		Rps24	Eva1c
				Tmbim1		Rsad2	Exd1
				Tmem114		Rspo3	Exd2
				Tmem132a		Rtp4	Exoc3
				Tmem150c		Runx1	Exoc3l2
				Tmem178b		S1pr3	Exoc3l4
				Tmem198		Samd9l	Exoc6b
				Tmem25		Samsn1	Extl3
				Tmem267		Sash3	Eya1
				Tmem63a		Satb1	Eya4
				Tmem64		Scarna13	Ezr
				Tnc		Sema5a	F11r
				Tnfaip8l1		Serhl	F5
				Tnnc1		Serinc2	F830016B08Rik
				Tnnt2		Serpina3n	Fa2h
				Tnrc6a		Serpinb1b	Fads1
				Top2a		Serpinb6a	Fam102b
				Tpbg		Serpinb9	Fam107a
				Trabd2b		Serping1	Fam124a
				Trf		Shisa5	Fam135b
				Trim36		Siah3	Fam167a
				Trp53i11		Siglec1	Fam167b
				Trpc5		Six4	Fam178b
				Tshz2		Sla	Fam180a
				Tsnax		Slamf7	Fam189a2
				Ttc22		Slamf9	Fam20a
				Ttc39a		Slc11a1	Fam227b
				Ttll5		Slc13a4	Fam234a
				Ttyh2		Slc15a3	Fam83b
				Tunar		Slc16a14	Fan1
				Ubb-ps		Slc17a7	Far1
				Ube2nl		Slc26a7	Fas
				Ubtd2		Slc35f1	Fat1
				Unc13c		Slc38a5	Fat3
				Usp43		Slc44a5	Fblim1
				Usp54		Slc6a20a	Fbln1
				Ust		Slc6a9	Fbln7
				Vamp1		Slc7a10	Fbn2
				Vat1l		Slc7a11	Fbxl5
				Vgll3		Slc8a1	Fbxo17
				Vldlr		Slc8a2	Fbxw23
				Vmn1r90		Slc9b2	Fcer1g
				Vsig2		Slco2a1	Fcgr1
				Vstm2a		Slfn2	Fcgr2b
				Vstm5		Slfn8	Fcgr3
				Vwa5b1		Slfn9	Fcgr4
				Wfs1		Slit3	Fcna
				Wwc1		Slitrk3	Fcrl1
				Wwc2		Smoc1	Fcrls
				Wwox		Smpdl3b	Fdft1
				Xaf1		Smyd3	Fermt3
				Ypel1		Snca	Fes
				Zbbx		Snhg11	Fev
				Zc3hav1		Snora23	Fgd2
				Zdhhc2		Snora73b	Fgd3
				Zfp268		Sord	Fgf1
				Zfp365		Sp100	Fgf2
				Zfp503		Sp110	Fgf9
				Zfp516		Sp140	Fgfbp1
				Zfp518a		Spata2l	Fgfbp3
				Zfp57		Spdya	Fgfr4
				Zfp677		Spi1	Fgfrl1
				Zfp811		Spon1	Fgl2
				Zfp831		Spp2	Fgr
				Zfp947		Sqor	Fhod1
				Znf41-ps		Sstr3	Fibin
						St8sia6	Fignl2
						Stard5	Fkbp10
						Stat1	Fkbp1a
						Stat6	Fli1
						Stk17b	Flna
						Stx11	Flnb
						Stx1b	Flnc
						Sulf1	Flot1
						Sv2c	Flvcr2
						Syde1	Fmn1
						Syn1	Fmnl1
						Synpr	Fmnl3
						Tagap	Fmo2
						Tap1	Fmod
						Tap2	Fnbp1l
						Tapbp	Fndc5
						Tasl	Fnip2
						Tcap	Fnta
						Tcea3	Fos
						Tent5c	Fosl1
						Tex11	Fosl2
						Tfcp2l1	Foxc1
						Tgfbr1	Foxc2
						Tgtp1	Foxd1
						Tgtp2	Foxk1
						Th	Foxl1
						Thbs1	Foxn2
						Them4	Foxp2
						Tifa	Fpgt
						Timp1	Frk
						Timp3	Frmd7
						Tirap	Frmpd4
						Tle3	Frrs1
						Tlr1	Frrs1l
						Tlr13	Fsd2
						Tlr2	Fstl5
						Tlr3	Fth1
						Tlr4	Ftl1
						Tlr6	Ftl1-ps1
						Tlr7	Fuca1
						Tmc7	Fut2
						Tmco4	Fut8
						Tmem119	Fxyd1
						Tmem132a	Fxyd6
						Tmem176a	Fyb
						Tmem229b	Fzd10
						Tmem255a	Fzd2
						Tnc	Fzd7
						Tnfrsf12a	G530011O06Rik
						Tnfrsf1a	Gab1
						Tnfrsf1b	Gab2
						Tnr	Gabra1
						Tnxb	Gabra2
						Tor3a	Gabra4
						Tpbg	Gabrb3
						Traf3	Gabrg2
						Trank1	Gabrg3
						Trem2	Gadd45a
						Treml2	Gadl1
						Trib2	Gal3st1
						Trim12a	Galc
						Trim12c	Galm
						Trim14	Galns
						Trim21	Galnt12
						Trim25	Galnt13
						Trim30a	Galnt15
						Trim30d	Galnt3
						Trim34a	Galnt6
						Trim5	Galnt7
						Trim56	Galr3
						Trip10	Gamt
						Trp53inp2	Gbp10
						Tshz3	Gbp11
						Tspan2	Gbp2
						Tspo	Gbp3
						Ttbk1	Gbp5
						Ttc9	Gbp6
						Ttyh3	Gbp9
						Tunar	Gch1
						Txlnb	Gcnt1
						Txnip	Gde1
						Tyrobp	Gdf10
						Uap1l1	Gdpd3
						Uba7	Gfap
						Ube2cbp	Ggt5
						Ube2l6	Ggta1
						Ugt8a	Gimap3
						Unc93b1	Gimap4
						Ush1g	Gipr
						Usp18	Gja1
						Utrn	Gjb2
						Vash1	Gjb6
						Vat1	Gjc3
						Vat1l	Glb1l2
						Vav1	Glipr1
						Vegfc	Glipr2
						Vil1	Glis3
						Vim	Glra2
						Vipr2	Glrb
						Vps13a	Gm10033
						Vsir	Gm10521
						Vwa5a	Gm10568
						Wasf3	Gm10635
						Wdfy4	Gm10640
						Wfdc17	Gm10654
						Xaf1	Gm10684
						Xlr	Gm10790
						Ybx2	Gm10925
						Zbp1	Gm11639
						Zc3hav1	Gm12092
						Zfp185	Gm12250
						Zfp442	Gm13322
						Zfp462	Gm13391
						Zfp57	Gm13967
						Zfp703	Gm14204
						Zfp808	Gm14305
						Zfp827	Gm15169
						Zfp92	Gm15462
						Zfp934	Gm15663
						Zfp951	Gm15964
						Zfp97	Gm16083
						Zkscan16	Gm16233
						Zmat3	Gm16287
							Gm16316
							Gm16332
							Gm16485
							Gm16675
							Gm18529
							Gm19026
							Gm19721
							Gm20162
							Gm20300
							Gm20559
							Gm20634
							Gm20707
							Gm2106
							Gm2115
							Gm21188
							Gm2164
							Gm2629
							Gm26498
							Gm26532
							Gm26588
							Gm26714
							Gm26737
							Gm26740
							Gm26834
							Gm28320
							Gm28438
							Gm28661
							Gm2897
							Gm29326
							Gm29455
							Gm29695
							Gm31135
							Gm31166
							Gm31282
							Gm32005
							Gm32122
							Gm3226
							Gm32926
							Gm3325
							Gm33727
							Gm33989
							Gm34237
							Gm3435
							Gm34589
							Gm34776
							Gm35850
							Gm36356
							Gm36529
							Gm3654
							Gm36757
							Gm36823
							Gm36855
							Gm37010
							Gm37056
							Gm37111
							Gm37277
							Gm37352
							Gm37452
							Gm37460
							Gm37534
							Gm37725
							Gm37760
							Gm37885
							Gm38340
							Gm38393
							Gm38642
							Gm39244
							Gm40466
							Gm40578
							Gm41804
							Gm4221
							Gm42503
							Gm42528
							Gm42603
							Gm42635
							Gm42684
							Gm42756
							Gm42868
							Gm42928
							Gm42929
							Gm43089
							Gm43145
							Gm43196
							Gm43197
							Gm43323
							Gm43594
							Gm43668
							Gm43775
							Gm43921
							Gm44220
							Gm44620
							Gm44710
							Gm44860
							Gm44861
							Gm44951
							Gm45073
							Gm45104
							Gm45426
							Gm45495
							Gm46224
							Gm47033
							Gm47059
							Gm47283
							Gm48074
							Gm4813
							Gm48508
							Gm48678
							Gm48697
							Gm4876
							Gm48898
							Gm49375
							Gm49417
							Gm49492
							Gm4951
							Gm49891
							Gm5067
							Gm5086
							Gm53008
							Gm53028
							Gm5424
							Gm5431
							Gm5697
							Gm5844
							Gm597
							Gm6548
							Gm7298
							Gm7696
							Gm7932
							Gm7967
							Gm816
							Gm8184
							Gm8399
							Gm8437
							Gm867
							Gm9320
							Gm9946
							Gmfg
							Gmip
							Gna15
							Gnai2
							Gng11
							Gng12
							Gng3
							Gng4
							Gng8
							Gngt2
							Gns
							Golga7
							Golm1
							Golm2
							Gphn
							Gpm6a
							Gpm6b
							Gpnmb
							Gpr137b
							Gpr139
							Gpr155
							Gpr157
							Gpr160
							Gpr165
							Gpr17
							Gpr176
							Gpr183
							Gpr26
							Gpr31c
							Gpr34
							Gpr35
							Gpr4
							Gpr65
							Gpr84
							Gpr85
							Gpsm3
							Gpt
							Gpx1
							Gpx3
							Gpx8
							Gramd1c
							Gramd3
							Grap2
							Greb1
							Gria1
							Gria4
							Grid2ip
							Grifin
							Grik1
							Grik2
							Grin2a
							Grin2b
							Grin3a
							Grm3
							Grn
							Gsap
							Gsdmd
							Gsn
							Gsr
							Gstm1
							Gstm5
							Gstm6
							Gtse1
							Gucy1a2
							Gucy2f
							Gusb
							Gvin1
							Gvin3
							Gvin-ps6
							Gvin-ps7
							Gxylt2
							Gypc
							H19
							H2ac7
							H2aw
							H2bc8
							H2-D1
							H2-DMa
							H2-DMb1
							H2-K1
							H2-K2
							H2-M3
							H2-Oa
							H2-Ob
							H2-Q1
							H2-Q4
							H2-Q5
							H2-Q6
							H2-Q7
							H2-T10
							H2-T23
							H2-T24
							H3c11
							H3c4
							H6pd
							Haao
							Hacd4
							Hapln1
							Has3
							Havcr2
							Hbegf
							Hcar1
							Hcar2
							Hccs
							Hck
							Hcls1
							Hcn1
							Hdac9
							Hdc
							Hdhd2
							Heatr5b
							Hecw1
							Heg1
							Heph
							Herc6
							Hes3
							Hexa
							Hexb
							Hfe
							Hgf
							Hhex
							Hhip
							Hk2
							Hk3
							Hlx
							Hmcn1
							Hmgcr
							Hmgcs1
							Hmgcs2
							Hmgn5
							Hmox1
							Hoga1
							Homer2
							Homer3
							Hook2
							Hoxa9
							Hoxb9
							Hoxc8
							Hoxd9
							Hpgd
							Hpgds
							Hpn
							Hps1
							Hpse
							Hrk
							Hs3st2
							Hs3st4
							Hsbp1
							Hscb
							Hsd11b1
							Hsd17b10
							Hsd17b12
							Hsd17b7
							Hsp90aa1
							Hsp90b1
							Hspa1a
							Hspa1b
							Hspa4
							Hspa4l
							Hspa5
							Hspa8
							Hspb1
							Hspe1
							Hsph1
							Htr1b
							Htr2a
							Htr7
							Htra4
							Hvcn1
							Hyi
							I830077J02Rik
							Icam1
							Icosl
							Ide
							Idh1
							Idh2
							Idi1
							Idi1-ps1
							Iffo2
							Ifi204
							Ifi206
							Ifi207
							Ifi208
							Ifi209
							Ifi211
							Ifi213
							Ifi27
							Ifi27l2a
							Ifi30
							Ifi35
							Ifih1
							Ifit1
							Ifit2
							Ifit3
							Ifit3b
							Ifitm1
							Ifitm3
							Ifitm7
							Ifngr1
							Igf1
							Igf1r
							Igf2
							Igf2bp2
							Igfbp2
							Igfbp3
							Igfbp4
							Igfbpl1
							Igkc
							Igkv4-55
							Igsf1
							Igsf6
							Igtp
							Ikbke
							Ikzf1
							Ikzf3
							Il10ra
							Il10rb
							Il12rb2
							Il17ra
							Il1a
							Il1b
							Il1r1
							Il1rap
							Il1rl1
							Il1rl2
							Il1rn
							Il21r
							Il27ra
							Il2ra
							Il2rb
							Il2rg
							Il31ra
							Il33
							Il3ra
							Il4i1
							Il4ra
							Il6ra
							Ildr1
							Ildr2
							Impg2
							Inca1
							Inpp5d
							Insig1
							Ip6k3
							Iqgap1
							Iqgap3
							Irag2
							Irak2
							Irak3
							Irak4
							Irf1
							Irf5
							Irf7
							Irf8
							Irf9
							Irgm1
							Irgm2
							Irs2
							Islr
							Isoc1
							Isyna1
							Itfg1
							Itga5
							Itga7
							Itgal
							Itgam
							Itgav
							Itgax
							Itgb2
							Itgb5
							Itgbl1
							Itih2
							Itih3
							Itk
							Itm2a
							Itpkb
							Itprid2
							Itpripl1
							Itpripl2
							Jade2
							Jak3
							Jam3
							Jcad
							Jchain
							Josd2
							Jpt2
							Junb
							Kcna4
							Kcnb2
							Kcne1l
							Kcnh4
							Kcnj10
							Kcnj13
							Kcnj2
							Kcnk6
							Kcnn2
							Kcns1
							Kctd10
							Kctd12
							Kctd21
							Kctd3
							Kctd4
							Kdelr3
							Kif19a
							Kif1c
							Kifc2
							Kirrel3
							Kit
							Kl
							Klc3
							Klf6
							Klhdc7a
							Klhdc7b
							Klhdc8a
							Klhl28
							Klhl31
							Klhl4
							Klhl5
							Klhl6
							Klk6
							Klk8
							Klk9
							Klrb1b
							Kmt5a
							Kremen1
							Krt19
							Krt222
							Ky
							Kynu
							Lacc1
							Lag3
							Lair1
							Lama1
							Lama2
							Lama4
							Lamb1
							Lamc1
							Lamc3
							Lamp5
							Laptm5
							Lat2
							Lbh
							Lcat
							Lclat1
							Lcp1
							Lcp2
							Ldlr
							Ldlrad3
							Ldlrad4
							Lefty1
							Lgals3
							Lgals3bp
							Lgals9
							Lgi1
							Lgi4
							Lhcgr
							Lhfpl2
							Lif
							Lig1
							Lilra5
							Lilrb4a
							Lilrb4b
							Lims2
							Lin7b
							Lingo2
							Liph
							Lix1
							Lix1l
							Lmna
							Lmntd1
							Lmo2
							Lmo7
							Lnpk
							Loxl1
							Loxl2
							Loxl3
							Lpar1
							Lpar4
							Lpar5
							Lpcat1
							Lpcat2
							Lpin3
							Lpl
							Lpxn
							Lratd2
							Lrfn5
							Lrguk
							Lrig1
							Lrmda
							Lrp2
							Lrp4
							Lrrc25
							Lrrc3
							Lrrc55
							Lrrc8c
							Lrrc9
							Lrrk1
							Lrrn1
							Lrrtm2
							Lrrtm4
							Lsp1
							Ltbp1
							Ltbr
							Lum
							Luzp1
							Ly86
							Ly9
							Lyl1
							Lyn
							Lynx1
							Lypd1
							Lypd2
							Lyz1
							Lyz2
							Mafb
							Maff
							Mafk
							Magt1
							Mal
							Mal2
							Mamdc2
							Man1c1
							Man2b1
							Man2b2
							Manba
							Map3k14
							Map3k15
							Map3k21
							Map3k6
							Map4k4
							Map6d1
							Map9
							Mapk10
							Mapk8
							Mapkapk3
							Marchf8
							Marcksl1
							Marf1
							Matn3
							Mbd6
							Mboat1
							Mc5r
							Mcc
							Mcl1
							Mcm3
							Mcm6
							Mcoln3
							Mdfic
							Med14
							Med21
							Mertk
							Mest
							Met
							Mettl27
							Mfap4
							Mfap5
							Mfng
							Mfsd11
							Mfsd2a
							Mfsd7a
							Mgat4c
							Mgl2
							Mgp
							Mical1
							Mid1
							Mideas
							Milr1
							Mir142hg
							Mkks
							Mlip
							Mllt11
							Mllt6
							Mlph
							Mlxipl
							Mmaa
							Mmp11
							Mmp12
							Mmp19
							Mmp23
							Mms22l
							Mob1a
							Mob3b
							Mobp
							Mocos
							Mocs1
							Mog
							Morn2
							Mospd2
							Mov10
							Moxd1
							Mpeg1
							Mpz
							Mpzl2
							Mr1
							Mrgprf
							Mrgprh
							Mroh7
							Mrpl35
							Mrps36
							Ms4a14
							Ms4a4b
							Ms4a4c
							Ms4a6b
							Ms4a6c
							Ms4a6d
							Ms4a7
							Msmo1
							Msn
							Msr1
							Mt2
							mt-Atp6
							mt-Co2
							mt-Co3
							Mtmr11
							mt-Nd1
							mt-Nd2
							Mtr
							mt-Ti
							mt-Tm
							mt-Tq
							mt-Tt
							Mug1
							Mug2
							Mug-ps1
							Musk
							Mvd
							Mvp
							Mx1
							Mybl1
							Myc
							Mycbp
							Mycl
							Myct1
							Myh1
							Myh4
							Myh9
							Myl1
							Mylip
							Mylk
							Mylk4
							Mylpf
							Myo1b
							Myo1c
							Myo1f
							Myo1g
							Myo7a
							Myoc
							Myof
							Myorg
							Mypopos
							Myzap
							Naaa
							Naalad2
							Nab2
							Naga
							Nagk
							Naglu
							Naip2
							Naip5
							Naip6
							Nalcn
							Nalf1
							Naprt
							Nat8
							Nat8f3
							Nat8f5
							Ncam2
							Ncan
							Ncf1
							Ncf2
							Ncf4
							Nckap1l
							Ncmap
							Ncoa7
							Ndfip2
							Ndnf
							Ndst1
							Ndst4
							Ndufa3
							Ndufaf4
							Ndufb2
							Ndufs8
							Neat1
							Neb
							Necap2
							Nefh
							Nefl
							Negr1
							Neil2
							Nek6
							Nek9
							Nell2
							Nes
							Neu4
							Neurl3
							Nfam1
							Nfatc1
							Nfkb1
							Nfkb2
							Nfkbid
							Nfkbie
							Nfkbiz
							Nfya
							Ngfr
							Nhlrc3
							Niban1
							Niban2
							Nid1
							Nipal4
							Nkain2
							Nkain4
							Nkg7
							Nlrc5
							Nlrp1a
							Nlrp1b
							Nlrp1c-ps
							Nlrp3
							Nlrp5-ps
							Nmnat3
							Nnat
							Nod2
							Nog
							Nol3
							Nopchap1
							Notch3
							Nox4
							Npb
							Npr2
							Npy5r
							Nradd
							Nrarp
							Nrep
							Nrg1
							Nrk
							Nrros
							Nrxn1
							Nsa2-ps1
							Nsdhl
							Ntpcr
							Nts
							Nuak2
							Nwd2
							Nxph1
							Nxph2
							Oaf
							Oas1a
							Oas1b
							Oas1g
							Oas2
							Oas3
							Oasl1
							Oasl2
							Obox3-ps7
							Obox4-ps2
							Ogdhl
							Ogg1
							Ogn
							Olfm3
							Olfml3
							Olfr111
							Olfr1372-ps1
							Olfr287
							Olfr558
							Olfr920
							Olr1
							Omd
							Omg
							Onecut2
							Opalin
							Oplah
							Opn3
							Optn
							Osbpl3
							Osgin1
							Osm
							Osmr
							Osr1
							Otud1
							Otulinl
							Ovgp1
							P2rx4
							P2rx7
							P2ry1
							P2ry13
							P2ry2
							P2ry6
							P3h2
							P4ha3
							Pabpc1
							Pacs2
							Pag1
							Paip2
							Pak3
							Pak5
							Pald1
							Palld
							Palmd
							Pamr1
							Pank1
							Pank3
							Papln
							Pappa
							Pappa2
							Paqr8
							Pard6g
							Parm1
							Parp12
							Parp14
							Parp16
							Parp3
							Parp4
							Parp9
							Parvg
							Pbxip1
							Pcdh11x
							Pcdh12
							Pcdh17
							Pcdh18
							Pcdh19
							Pcdh20
							Pcdh9
							Pcdha1
							Pcdhb1
							Pcdhb10
							Pcdhb11
							Pcdhb12
							Pcdhb13
							Pcdhb14
							Pcdhb18
							Pcdhb19
							Pcdhb2
							Pcdhb20
							Pcdhb21
							Pcdhb22
							Pcdhb3
							Pcdhb4
							Pcdhb5
							Pcdhb6
							Pcdhb7
							Pcdhb8
							Pcdhb9
							Pcdhga1
							Pcdhga2
							Pcdhga3
							Pcdhga4
							Pcdhga5
							Pcdhga6
							Pcdhga7
							Pcdhga8
							Pcdhgb2
							Pcdhgb4
							Pcdhgb5
							Pcdhgb6
							Pcdhgb7
							Pcdhgc3
							Pcdhgc4
							Pcdhgc5
							Pcnt
							Pcolce
							Pcyt1b
							Pdcd1
							Pde1a
							Pde5a
							Pde6d
							Pdgfb
							Pdgfd
							Pdgfrb
							Pdhb
							Pdhx
							Pdia3
							Pdia4
							Pdia6
							Pdlim4
							Pdpn
							Pds5b
							Pdzrn3
							Pecr
							Peg10
							Peg12
							Perm1
							Perp
							Pex5l
							Pfkfb4
							Pfkl
							Pgd
							Pgm2l1
							Pgm5
							Phf1
							Phf11b
							Phf11d
							Phyhd1
							Phyhipl
							Pi15
							Pi16
							Piezo1
							Piezo2
							Piga
							Pigc
							Pigq
							Pik3ap1
							Pik3c2a
							Pik3cd
							Pik3cg
							Pik3r5
							Pik3r6
							Pilra
							Pink1
							Pir
							Pirb
							Pirt
							Pisd-ps1
							Pkn1
							Pkp4
							Pla2g15
							Pla2g3
							Pla2g4a
							Plac9
							Plat
							Plau
							Plaur
							Plcb1
							Plcb2
							Plcb3
							Plcd1
							Plce1
							Plcg2
							Pld2
							Pld4
							Plek
							Plekha2
							Plekha7
							Plekhg1
							Plekho1
							Plekho2
							Plet1os
							Plin2
							Plin4
							Plod1
							Plp1
							Plp2
							Plppr5
							Plscr1
							Plscr2
							Plscr4
							Plxna4os1
							Plxnb2
							Plxnd1
							Pmaip1
							Pml
							Pmp22
							Pmvk
							Pnpla7
							Podn
							Pole
							Pon3
							Postn
							Pou2f2
							Pou3f1
							Ppard
							Pparg
							Ppfia2
							Ppid
							Ppl
							Ppm1e
							Ppp1r11
							Ppp1r14b
							Ppp1r18
							Ppp1r1a
							Ppp1r1c
							Ppp1r3b
							Pqlc3
							Praf2
							Prdm1
							Prdm6
							Prdx6
							Prelid2
							Prelp
							Prg4
							Prickle1
							Prickle3
							Prkag3
							Prkar2b
							Prkcd
							Prkcq
							Prom2
							Pros1
							Prr14l
							Prr18
							Prrg1
							Prrg3
							Prrg4
							Prss23
							Prss30
							Prss35
							Prx
							Psd3
							Psd4
							Psmb8
							Psmb9
							Psme1
							Psrc1
							Ptafr
							Ptbp1
							Ptcd2
							Ptchd4
							Ptgds
							Ptger4
							Ptgs1
							Ptk2b
							Ptn
							Ptpn1
							Ptpn13
							Ptpn18
							Ptpn21
							Ptpn23
							Ptpn4
							Ptpn6
							Ptprc
							Ptprd
							Ptprk
							Ptpro
							Ptprv
							Ptx3
							Pvr
							Pvt1
							Pwwp3b
							Pxdc1
							Pxn
							Pycard
							Pycr1
							Pygl
							Pygm
							Pyroxd2
							Rab20
							Rab30
							Rab32
							Rab33a
							Rab37
							Rab39b
							Rab3c
[truncated: 620 more rows]

## Sheet: Table S2
Positive Regulation of Inflammatory Response	Negative Regulation of Inflammatory Response	Interferon-mediated Signalling	Interleukin-mediated Signalling	Disease Associated Microglia	Microglial Phagocytic Exhaustion	Inflammasomes	Tfam-/-	LINE1 Derepression	cGAS-STING	TE Regulation	H3K9me3 proteome
Abcc1	Abr	Adar	Akt1	4632427E13Rik	Ager	Aim2	Abi3bp	Bst2	Akt1	Actb	BCLAF1
Adam8	Acod1	Arg1	C1qtnf4	9130401M01Rik	Anxa1	Casp1	Agrn	Cxcl10	Aurkb	Actl6a	CHTOP
Adora2b	Acp5	Cactin	Casp4	Acaca	Bcl6	Casp4	Apol9b	Ifi204	Banf1	Actl6b	Crebrf
Adora3	Ada	Cdc37	Cd300lf	Ache	Ccl2	Ddx3x	Bst2	Ifi27	Cdk1	Ago2	CBX1
Aim2	Adcyap1	Cnot7	Cd4	Adarb1	Ccr2	Dhx33	Ccl2	Ifi30	Cgas	Alkbh5	CBX3
Alox5ap	Adipoq	Dcst1	Cebpa	Adck5	Ccr5	Gsdmd	Cmpk2	Ifih1	Ifi204	Arid1a	CBX5
Aoc3	Adora1	Dnaja3	Csf2rb	Ank	Cd244a	Il18	Cxcl10	Ifit1	Irf3	Arid1b	CCDC137
App	Adora2a	Eif4e2	Csf2rb2	Ankrd16	Cd274	Il1b	Dhx58	Ifit2	Irf9	Arid2	CCDC59
Btk	Ahr	Fadd	Ctr9	Apbb2	Cd38	Naip1	Dtx3l	Ifit3	Lyplal1	Atf7ip	CCDC86
C2cd4a	Alox5	Gigyf2	Cxcr2	Aplp2	Cd72	Naip2	Enpep	Ifitm1	Map3k7	Atrx	CEBPZ
C2cd4b	Aoah	Hdac4	Cyld	Apoe	Cd74	Naip5	Enpp2	Ifitm3	Nfkb1	Bap1	CHAF1A
C3	Apoa1	Hpx	Egr1	Aprt	Cd86	Naip6	Gbp2	Ifna1	Parp1	Bcl7a	YBX3
Camk2n1	Apoe	Ifih1	Fcer1g	Arap2	Clec7a	Nlrc4	Gbp3	Ifna2	Ppp6c	Bcl7b	CUX1
Casp1	Arnt	Ifitm1	Fer	Arrdc4	Csf1	Nlrp1a	Gbp7	Ifne	Prkdc	Bcl7c	DDX17
Casp4	Ash1l	Ifitm2	Gab1	Asb10	Cxcl10	Nlrp1b	H2-Q4	Irf5	Sting1	Bicra	DDX5
Ccl1	Bcr	Ifitm3	Gfi1	Atf3	Entpd1	Nlrp3	Helz2	Isg15	Tab1	Bicral	EBNA1BP2
Ccl3	C1qtnf3	Ifitm6	Ikbkb	Atp11c	Havcr2	Nlrp6	Ifi35	Jak1	Tbk1	Brd4	ERH
Ccl5	C1qtnf12	Ifitm7	Ikbke	Atp6v0c	Icos	Pycard	Ifi44	Mal	Zbp1	Brd7	EXOSC10
Ccl24	Ccn3	Ifna1	Il11	Atp6v0c-ps2	Il2rb		Ifih1	Mx1	Zdhhc18	Brd9	FUS
Ccn4	Cd24a	Ifnar1	Il11ra1	Axl	Il33		Ifit1	Mx2	Zdhhc9	Cbx1	FYTTD1
Ccr2	Cd44	Ifnar2	Il11ra2	Baiap2l2	Il7r		Ifit3	Oas2		Cbx3	GATAD2A
Ccr5	Cd200	Ifnb1	Il12a	Bcl2a1b	Kit		Ifit3b	Rigi		Cbx5	GATAD2B
Ccr7	Cd200l1	Ifng	Il12b	Birc5	Klf4		Igtp	Stat1		Cdk2ap1	Nop53
Cd24a	Cd200l2	Ifngr1	Il12rb1	Bola2	Lag3		Iigp1	Stat3		Cdk2ap2	HDLBP
Cd28	Cd200r1	Ifngr2	Il12rb2	Cadm1	Ly96		Irf7	Tnfsf10		Chaf1a	HMGA1
Cd47	Cd276	Igtp	Il15	Capg	Myd88		Irf9			Chaf1b	HNRNPA2B1
Cd81	Cdh5	Ikbke	Il15ra	Ccdc88a	Nfkb1		Irgm1			Chd3	HNRNPK
Cebpa	Chrna7	Irak1	Il17a	Ccl3	P2rx7		Irgm2			Chd4	HNRNPL
Cebpb	Cst7	Irf1	Il17f	Ccl4	Pdcd1		Isg15			Chd5	HP1BP3
Clock	Ctla2a	Irf3	Il17ra	Ccl6	Prickle1		Lgals3bp			Ctcf	KHDRBS1
Cnr1	Cx3cr1	Irf7	Il17rc	Cd22	S100a8		Mx2			Daxx	KHDRBS3
Csf1r	Cxcl17	Irgm1	Il18	Cd34	Satb1		Oas1a			Ddx4	LLPH
Ctsc	Cyld	Irgm2	Il18r1	Cd52	Sirpa		Oasl2			Dgcr8	LOXL1
Ctss	Cyp19a1	Isg15	Il18rap	Cd63	Socs3		Parp10			Dhx9	LOXL2
Ddt	Dusp10	Jak1	Il1a	Cd74	Spp1		Parp14			Dicer1	LTBP2
Dhx9	Elf4	Jak2	Il1b	Cd83	Stat1		Parp9			Dnmt1	MATR3
Ets1	Enpp3	Lsm14a	Il1r1	Cd9	Tcf7		Psmb8			Dnmt3a	MBD3
Fabp4	Ets1	Mavs	Il1r2	Cdc42ep3	Ticam1		Rigi			Dnmt3b	MBNL1
Fcer1a	Extl3	Med1	Il1rap	Cdca8	Ticam2		Rnf213			Dnmt3c	MPHOSPH10
Fcer1g	Fcgr2b	Mettl3	Il1rl1	Ch25h	Tirap		Rtp4			Dnmt3l	MRTO4
Fcgr1	Fem1a	Mmp12	Il1rn	Chst1			Sim2			Dpf1	MYBBP1A
Fcgr3	Fem1al	Mul1	Il2	Clec7a			Slfn2			Dpf2	MYEF2
Fem1a	Ffar4	Myd88	Il2ra	Cops9			Stat1			Dpf3	NCOA5
Ffar2	Fndc4	Nlrc5	Il2rb	Cox6a2			Stat2			Drosha	NCOA7
Ffar3	Foxf1	Oas1a	Il2rg	Cox6c			Tgtp1			Ehmt1	NONO
Gpr4	Foxp3	Oas1b	Il3	Cpd			Trim30a			Ehmt2	PES1
Gprc5b	Fpr2	Oas1c	Il33	Crip1			Trim30d			Elp3	PHB
Gpsm3	Fpr3	Oas1d	Il34	Crlf2			Usp18			Fto	PIAS2
Grn	Fpr-rs3	Oas1e	Il3ra	Csf1			Xaf1			Gatad2a	POLDIP3
Gsdmd	Fpr-rs4	Oas1f	Il4	Csf2ra			Zbp1			Gatad2b	PPAN
H2-D1	Fpr-rs6	Oas1g	Il4ra	Cst7						Gtsf1	PPHLN1
H2-K1	Fpr-rs7	Oas1h	Il5	Ctsb						H3f3a	PRDM15
H2-M1	Fxr1	Oas2	Il5ra	Ctsz						H3f3b	PRMT1
H2-M2	Gata3	Oas3	Il6	Cxcl16						H3f3c	PRRX2
H2-M5	Ghrl	Otop1	Il6ra	Cybb						Hdac1	PTBP1
H2-M9	Ghsr	Parp14	Il6st	Dhcr7						Hdac2	QKI
H2-M10.1	Git1	Parp9	Il9r	Dhx32						Hinfp	RBM12B1
H2-M10.2	Gper1	Pparg	Irak1	Dnajc15						Kmt5b	RBM15
H2-M10.3	Gpr17	Ptpn2	Irak2	Dpcd						Kmt5c	RBM26
H2-M10.4	Gpr31b	Rbm47	Irak3	Dpp7						Lig1	RBM6
H2-M10.5	Gps2	Rfpl4b	Irak4	Dusp3						Mbd2	RBMX
H2-M10.6	Gpx1	Rnf185	Jak1	Echs1						Mbd3	RBMXL1
H2-M11	Gpx2	Samhd1	Jak2	Egr2						Mbd5	RELA
H2-Q1	Grn	Sin3a	Jak3	Ell2						Mbd6	RIF1
H2-Q2	Gstp1	Smim30	Lyn	Enpp1						Mettl14	RPF1
H2-Q4	Hamp	Stat1	Map3k7	Enpp2						Mettl16	RPF2
H2-Q6	Hgf	Stat2	Mapk3	Ero1b						Mettl3	RPS19BP1
H2-Q7	Ier3	Sting1	Mir301	Etl4						Morc1	SAFB
H2-Q10	Igf1	Tbk1	Myd88	Fam20c						Morc2a	SAFB2
H2-T3	Igtp	Trex1	Nfkbia	Fcgr4						Morc2b	SETDB1
H2-T9	Il2	Trim41	Nlrp6	Fgl2						Morc3	SFPQ
H2-T10	Il2ra	Trim56	Notch1	Frrs1						Mov10l1	TRA2B
H2-T22	Il4	Trim6	Oas2	Fth1						Mphosph8	SLTM
H2-T23	Il10	Trim65	Oasl1	Ftl1						Mta1	SUMO2
Hyal2	Il10ra	Trp53	Oasl2	Fxyd5						Mta2	SUV39H1
Ido1	Il12b	Ttll12	Otud4	Fxyd6						Mta3	SUV39H2
Ifi35	Il13	Txk	Parp14	Gfus						Mtr4	SUZ12
Ifng	Il17a	Tyk2	Pdgfb	Glipr1						Nsun2	TAF15
Ighg1	Il20rb	Ube2k	Pik3r1	Gm15772						Ogt	TARDBP
Ighg2b	Il22	Usp27x	Plcb1	Gnas						Pabpn1	TCF25
Il1b	Il22ra1	Usp29	Ptpn2	Gng12						Pbrm1	THRAP3
Il1rl1	Il22ra2	Wnt5a	Rela	Got1						Phf10	TRA2A
Il6	Il33	Ythdf2	Ripk1	Gpnmb						Piwil1	TRIM28
Il16	Ins1	Ythdf3	Rps6ka4	Gpr65						Piwil2	UBE2I
Il17ra	Ins2	Zbp1	Rps6ka5	Gusb						Piwil4	UTP3
Il17rb	Irgm1		Smad4	H2-D1						Pld6	WDR46
Il18	Irgm2		Spi1	H2-K1						Pphln1	XRN2
Il33	Isl1		Src	H2-Q7						Pspc1	YBX1
Kars1	Krt1		Srsf1	Hif1a						Rbbp4	YLPM1
Kcnn4	Ldlr		St18	Ifi204						Rbbp7	YTHDC1
Lbp	Lgals9		Stat1	Ifi27l2a						Rbm26	YY2
Ldlr	Lpcat3		Stat3	Ifi27l2b						Rbm27	ZC3H13
Lgals1	Lrfn5		Stat4	Ifit1						Rbm7	Zfp207
Lgals2	Macir		Stat5a	Ifit2						Safb	Zfp326
Lilra5	Mdk		Stat6	Igf1						Safb2	Zfp438
Lpl	Mefv		Syk	Il1b						Setdb1	Zfp512
Lrrk2	Metrnl		Ticam2	Ildr2						Setdb2	Zfp598
Lta	Mfhas1		Tirap	Itgax						Sin3a	Zfp622
Mdk	Mir147		Tnip2	Kcnj2						Sinhcaf	Zfp638
Mefv	Mir7578		Tollip	Lgals3bp						Sirt1
Mmp8	Mkrn2		Traf2	Lgi2						Sirt6
Napepld	Muc19		Traf3ip2	Lmbrd2						Sltm
Nfkbia	Mvk		Traf5	Lpl						Smarca2
Nfkbiz	Ndfip1		Traf6	Lyz2						Smarca4
Ninj1	Nfkb1		Trim32	Lyzl4						Smarcb1
Nkg7	Nlrc3		Tut4	Mamdc2						Smarcc1
Nlrp1a	Nlrp3		Tyk2	Mblac2						Smarcc2
Nlrp1b	Nlrp6		Usp25	Mif						Smarcd1
Nlrp3	Nlrp12		Vrk2	Mir682						Smarcd2
Nlrp6	Nlrx1		Yap1	Mrpl27						Smarcd3
Nlrp10	Nod2		Zbp1	Mt1						Smarce1
Nmi	Npy			Myo1e						Spen
Nppa	Npy5r			Naglu						Spocd1
Npy5r	Nr1d1			Nat8l						Ss18
Nupr1	Nr1d2			Ncbp2as2						Ss18l1
Osm	Nr1h3			Nceh1						Ss18l2
Park7	Nr1h4			Ndufv3						Sumo2
Pdcd4	Nr1h5			Nlrc5						Suv39h1
Pde2a	Nt5e			Npc2						Suv39h2
Pde5a	Otulin			Pkib						Tarbp2
Pik3cg	Pbk			Pld3						Tasor
Pla2g3	Pdcd10			Pogk						Tasor2
Plcg2	Pf4			Psat1						Tet1
Prkca	Pglyrp1			Pycrl						Tet2
Ptger3	Pla2g5			Ramp1						Tex15
Ptger4	Pla2g10			Rap2b						Tnrc18
Ptgs2	Ppara			Rpl23						Trim28
Pycard	Ppard			Rps18						Uhrf1
Ripk1	Pparg			Rras						Uhrf2
Rps19	Proc			S1pr1						Wiz
S100a8	Psma1			Scd2						Wtap
S100a9	Psmb4			Scpep1						Ytdc1
Serpine1	Ptger4			Sdc3						Ytdc2
Setd4	Ptgis			Serpine2						Ytdfh2
Snca	Ptpn2			Slamf9						Ytdhf3
Snx4	Ptpn6			Slc1a2						Ythdf1
Stap1	Rabgef1			Slc23a2						Yy1
Stat5a	Rb1			Slc44a1						Zc3h13
Stat5b	Reg3g			Speg						Zc3h3
Sucnr1	Rora			Spp1						Zcchc8
Tac1	Rps19			Srebf2						Zfc3h1
Tafa3	Selenos			Ssh1
Tgfb1	Sharpin			Ssr4
Tlr2	Siglece			St14
Tlr4	Siglecg			St8sia6
Tlr6	Sirpa			Stim2
Tnf	Slamf8			Sulf2
Tnfrsf1a	Slc39a8			Syngr1
Tnfrsf11a	Smad3			Tbcd
Tnfsf4	Smpdl3b			Thbs1
Tnfsf11	Socs3			Tmem154
Tnfsf18	Socs5			Tpd52
Tnip1	Sod1			Trim32
Tradd	Spn			Tspo
Trem2	Stat3			Ttf1
Trpv4	Syt11			Ttr
Tslp	Tafa3			Tuba1c
Ttbk1	Tff2			Tyrobp
Vamp8	Tnfaip3			Upp2
Wnt5a	Tnfaip6			Zdhhc21
Zbp1	Tnfaip8l2			Zfas1
Zp3	Tnfrsf1a			Zfp692
	Tnfrsf1b
	Trem2
	Trim45
	Trim65
	Tyro3
	Uaca
	Vps35
	Wfdc1
	Zfp36

## Sheet: Table S3
Young v Middle				Young v Old
CTX	HIP	CB	SC	CTX	HIP	CB	SC
L1MD2_dup516	B4_dup51554	RLTR4_MM-int_dup3749	L1Lx_I_dup960	RMER13A2_dup1447	L2d2_dup3971	RLTR4_MM-int_dup3749	PB1D7_dup22150
L1MdA_IV_dup2464	L1MdA_VI_dup9763	RLTR4_MM-int_dup3457	Lx_dup5095	B3_dup145648	B3_dup145648	B3_dup145648	L1Lx_I_dup960
IAPEY3-int_dup1779	L1MdA_VI_dup184	B2_Mm1a_dup1554	ERVB4_2-I_MM_dup256	B3_dup145649	B3_dup145649	L2d2_dup3971	Lx7_dup2140
L1MdA_IV_dup2466	IAPEz-int_dup3025	MTA_Mm_dup2638	IAPEy-int_dup198	L1MdA_IV_dup2464	B4_dup51554	RLTR4_Mm_dup119	ORR1A0_dup339
L1MdA_II_dup2479	L1MdF_III_dup9938	MER5B_dup2115	MMERVK10D3_I_dup842	Lx8_dup56642	L1MdA_VI_dup9763	B3_dup145649	Lx5c_dup9027
ETnERV3-int_dup505	L1_Mur3_dup12008	L1MdMus_II_dup1409	RLTR21_dup638	L1MdA_IV_dup2465	MMERVK10D3_I_dup954	ORR1B1-int_dup64320	RLTR4_MM-int_dup9059
IAPEz-int_dup844	MMERVK10D3_I_dup954	ERVB7_4-LTR_MM_dup20	MTEa_dup18054	ORR1B1-int_dup64320	L1MdA_VI_dup184	MER5A_dup2602	L1MdF_V_dup10756
IAP1-MM_I_dup32	L1MdF_III_dup9939	MurSatRep1_dup587	B2_Mm1a_dup11593	IAPEY3-int_dup1781	ORR1B1-int_dup64320	RLTR4_MM-int_dup3457	PB1D7_dup22151
ETnERV3-int_dup504	ETnERV3-int_dup505	MTD_dup54116	L1MdF_V_dup10756	Lx3B_dup2308	L1MdF_III_dup9938	ERVB2_1-I_MM_dup2	L2d2_dup3971
MTA_Mm_dup14857	IAPEY3-int_dup1779	Lx7_dup12493	MurSatRep1_dup204	L1MdA_IV_dup2466	L1MdF_III_dup9941	RLTR18-int_dup80	RLTR4_MM-int_dup3241
IAPEY3-int_dup1781	L1MdF_III_dup9941	RLTR4_MM-int_dup2310	MTA_Mm_dup6965	IAPEY3-int_dup1779	IAPEY3-int_dup1781	B3A_dup25936	ID_B1_dup100114
L1MdTf_II_dup562	RLTR6_Mm	MERVL-int_dup1668	IAPEz-int_dup779	MMERVK10D3_I_dup954	L1MdF_III_dup9939	B1_Mus1_dup95364	RLTR45-int_dup38
L1MdA_II_dup312	IAPEY3-int_dup1781	IAPEz-int_dup4234	L1Lx_IV_dup186	ETnERV3-int_dup505	IAPEY3-int_dup1779	MERVL-int_dup867	MTD_dup35125
MMERVK10D3_I_dup954	L1MdA_II_dup3968	L1MdA_IV_dup2740	L1MdGf_II_dup3543	L1MdMus_I_dup946	ETnERV3-int_dup505	MurSatRep1_dup150	MIR1_Amn_dup3929
Lx2A1_dup2067	PB1D10_dup46041	RLTR4_MM-int_dup1845	L1MdA_VI_dup3129	L1MdFanc_II_dup5220	B1_Mus1_dup95364	IAPEy-int_dup61	IAPEz-int_dup2933
L1MdF_III_dup9939	B2_Mm1t_dup24272	IAPLTR1_Mm_dup1418	L1_Mur2_dup1165	L1MdF_III_dup9939	L1MdGf_II_dup6255	IAPEz-int_dup4392	MTC-int_dup617
L3b_dup1658	ORR1A4_dup6575	L1MdTf_III_dup1823	Lx3B_dup400	IAPEz-int_dup1612	Lx7_dup25445	L1MdA_IV_dup2740	B1_Mus2_dup36911
B1_Mur4_dup8937	RLTR4_MM-int_dup3495	MT2_Mm_dup1143	RMER16-int_dup1261	L1MdF_III_dup9941	MMERVK10D3_I_dup953	MER20B_dup281	L1MB5_dup1097
L1MdGf_II_dup3059	MTA_Mm_dup3707	L1MdA_V_dup442	IAPEz-int_dup4803	IAP1-MM_I_dup32	L1MdA_IV_dup2465	MTE2b_dup5027	ORR1A2_dup13641
L1MdF_III_dup9941	RLTR6_Mm_dup1	MTE2b_dup5027	L1Lx_IV_dup187	L1MdF_III_dup9944	Lx2B2_dup8474	L1MdA_VI_dup3129	B1_Mur3_dup10996
L1MdF_III_dup9944	IAPLTR1_Mm_dup191	L1MdTf_III_dup3119	IAPLTR2_Mm_dup161	L1MdMus_I_dup945	L1MD2_dup526	L3_dup9858	B1_Mm_dup16251
Lx2_dup7094	L1MdF_V_dup6791	IAPEz-int_dup80	ID4_v_dup21205	Lx3B_dup2310	IAPLTR1a_Mm_dup1853	RMER19B2_dup2124	RLTR19-int_dup984
PB1D9_dup13430	L1MdGf_II_dup6255	L1Lx_IV_dup5288	ERVB4_2-I_MM_dup255	ETnERV3-int_dup504	RLTR13E_dup434	IAPEz-int_dup4669	RLTR45-int_dup39
IAPLTR3-int_dup1660	IAPEz-int_dup2307	L1MdA_II_dup1177	L1MA4_dup3983	IAPLTR3-int_dup1660	MERV1_I_dup193	L1MdF_III_dup12644	MMERVK10D3_I_dup842
L1MdA_IV_dup2465	RLTR4_MM-int_dup1833	ID_B1_dup11422	L1MdF_III_dup5149	L1MdF_III_dup9945	L1MdF_III_dup9944	MER20B_dup282	UCON29_dup100
L1MdA_I_dup552	Lx7_dup25445	L1_Mur2_dup9140	Lx3_Mus_dup152	RMER13B_dup770	L3_dup9858	ORR1G_dup3190	IAPLTR1_Mm_dup1098
IAPEz-int_dup5539	MTA_Mm_dup13097	MLT1A0_dup4845	Tigger13a_dup541	RLTR45-int_dup742	L1MdA_IV_dup2464	L1Lx_IV_dup12010	L1MdV_III_dup11373
MMETn-int_dup686	ORR1B1_dup8411	RLTR4_MM-int_dup3456	RMER17C_dup6082	L1MdF_V_dup5672	ORR1D1_dup3019	L1MdF_IV_dup19357	RLTR4_MM-int_dup11582
RLTR45-int_dup743	L1MdA_III_dup7296	L1MdTf_II_dup2889	IAPLTR1_Mm_dup269	ORR1A1_dup1001	RLTR4_MM-int_dup11582	RMER6A_dup4010	ORR1B1-int_dup11894
L1MdFanc_II_dup5537	MT2_Mm_dup188	ORR1A4_dup6575	L1M2_dup5153	Lx2A1_dup2067	RLTR4_MM-int_dup11441	MIRc_dup9238	ERVB4_2-I_MM_dup255
ID4_v_dup23049	IAPLTR2_Mm_dup633	PB1D10_dup23661	L1MdA_IV_dup4827	RLTR45-int_dup743	L1_Mur3_dup12008	RLTR19-int_dup984	B4A_dup91859
L1MdF_V_dup5672	IAPEY4_I_dup386	ORR1B1_dup6419	MLTR25C_dup49	RLTR13D3_dup19	MTB_dup6044	B1_Mus1_dup78709	B3_dup59369
LTRIS_Mus_dup667	MMERVK9E_I_dup1222	IAPEz-int_dup1806	L1MdF_IV_dup7497	L1MdFanc_I_dup4425	MMERVK10D3_I_dup842	L1MdV_III_dup11082	PB1D11_dup4450
L1MdA_II_dup214	IAPEz-int_dup5913	MIR_dup34005	ORR1A4_dup6575	MMETn-int_dup685	MTA_Mm_dup2692	RLTR45-int_dup38	B4A_dup91860
L1MdTf_II_dup3486	L1MdTf_II_dup130	RLTR18-int_dup80	MTEa_dup18053	RMER6C_dup1965	Lx_dup5095	ID_B1_dup107307	Lx3B_dup400
L1MdMus_I_dup945	MERVL_2A-int_dup136	IAPEz-int_dup1706	ORR1A3-int_dup917	RLTR33_dup963	IAPLTR1_Mm_dup92	MTD_dup54116	RLTR45_dup478
L1MdMus_I_dup946	MTE-int_dup841	L1MdTf_I_dup482	L1ME2_dup298	UCON14_dup29	RMER6A_dup4010	MMERVK10D3_I_dup842	RLTR4_MM-int_dup10070
MMERVK10C-int_dup2094	RLTR13E_dup434	IAPEz-int_dup5446	Lx5b_dup5888	Lx7_dup25445	ORR1A4_dup6575	RLTR18-int_dup79	RLTR19-int_dup982
MMETn-int_dup685	Lx6_dup8838	L1MdA_I_dup4473	B4A_dup96176	RMER1C_dup2022	B3_dup113338	Lx5c_dup9027	B1_Mm_dup16252
Lx3B_dup2308	MLTR11A_dup924	L1MdFanc_I_dup9302	L1MdV_III_dup9182	L1MdTf_II_dup3222	L1MdA_VI_dup3129	MurSatRep1_dup565	BGLII_Mur_dup99
MMVL30-int_dup504	IAPEz-int_dup2602	ORR1A4_dup5379	IAPEz-int_dup2933	L3_dup9858	ID_B1_dup107307	MMETn-int_dup258	L1MdA_IV_dup4827
L1MdA_II_dup683	MMERVK10D3_I_dup953	L1MD2_dup517	B3_dup123196	MT-int_dup185	L1_Mur3_dup17189	L1MdTf_III_dup3257	L1_Mur2_dup1165
L1MdV_I_dup1634	Lx2B2_dup8474	MurSatRep1_dup565	Lx8_dup42699	Lx8_dup4366	MERVL_2A-int_dup136	L1MdGf_II_dup6255	ERVB4_2-I_MM_dup256
RMER6C_dup1965	RMER16-int_dup1261	IAPEz-int_dup722	L1MB4_dup2798	B1_Mus1_dup95364	RMER19B2_dup2128	RLTR44-int_dup105	RLTR13B1_dup51
B1_Mur3_dup14138	RLTR17D_Mm_dup984	B2_Mm1a_dup3789	L1Lx_IV_dup4801	L1MdV_I_dup9080	MIRb_dup37266	B2_Mm1t_dup16691	L1_Mur3_dup1550
ETnERV3-int_dup508	L1MdA_I_dup3819	ORR1C2_dup5331	L1MdGf_I_dup2907	Lx2_dup7094	IAPEY3-int_dup1780	Lx7_dup32853	MER5A_dup5167
RLTR33_dup963	L1MdTf_I_dup656	L1MdTf_III_dup1904	L1MdA_I_dup384	MTEa_dup1671	L1MdF_V_dup6791	L1MdA_V_dup442	L2a_dup17377
MERVL-int_dup1399	IAPLTR3-int_dup1660	IAPEz-int_dup4454	L1Lx_II_dup108	L1ME3F_dup56	PB1D7_dup22150	IAPLTR2a2_Mm_dup1593	RLTR4_MM-int_dup3239
MTEa_dup1671	IAPLTR1a_Mm_dup702	L1MdTf_I_dup1484	Lx9_dup44828	L1MdFanc_II_dup5537	RCHARR1_dup903	ORR1D1_dup19257	Lx8_dup42699
RLTR10_dup2149	MMETn-int_dup171	L1MdA_II_dup1076	Charlie1_dup647	MERVL-int_dup867	IAPEz-int_dup2183	L1Lx_IV_dup12011	L1MdFanc_I_dup246
L1MdA_I_dup811	L1MdA_III_dup3161	L1MdF_IV_dup3030	L1MdGf_II_dup1110	PB1D7_dup9643	IAPEz-int_dup1247	RLTR41_dup178	L1_Mur2_dup6485
L1MdTf_II_dup1831	MTA_Mm_dup13095	MERVL-int_dup1538	ID_B1_dup59453	ETnERV3-int_dup508	L1MdF_III_dup8606	L1M3d_dup252	RLTR19-int_dup821
L1MdF_III_dup9938	IAPEz-int_dup2404	ORR1B1-int_dup11894	L1MdGf_II_dup3461	L1MdTf_II_dup2558	RLTR45-int_dup742	L1MdA_II_dup952	ORR1A4_dup3505
Lx7_dup25445	L1MdF_III_dup9944	MT2_Mm_dup1787	L1MdA_I_dup3479	L1MdMus_I_dup944	ORR1B1_dup8411	Lx3_Mus_dup723	L1Lx_IV_dup186
L1_Mur3_dup17189	RLTR6_Mm_dup93	L1Lx_IV_dup12010	Lx_dup965	L1MdFanc_II_dup5222	MTA_Mm_dup1456	L1MdF_V_dup4665	URR1A_dup18322
RLTR13E_dup434	MTA_Mm_dup16274	MT2_Mm_dup1276	L1MA9_dup3357	Lx2B2_dup763	L1MdTf_II_dup323	RMER19B_dup4729	ORR1A4_dup7621
IAPEz-int_dup1627	L1MdTf_II_dup2824	L1MdF_IV_dup19357	Lx5b_dup375	L1MdFanc_I_dup4426	MMETn-int_dup99	L1MdA_VII_dup411	B4A_dup82671
IAPLTR2b_dup981	L1MdF_V_dup10756	L1MDa_dup1284	L1MC4_dup5061	MTEb_dup9102	RMER6C_dup3478	ORR1A4_dup5380	L1MdA_II_dup307
L1MdA_I_dup3652	IAPLTR1_Mm_dup1661	L1MdTf_II_dup2748	L1MdTf_II_dup3718	L1MdF_III_dup9938	L2a_dup10437	RLTR4_MM-int_dup1847	B1F_dup19167
L1MdMus_II_dup9251	L1_Mur3_dup17189	L1MdTf_I_dup470	MLT1A0_dup6305	L2a_dup17466	MTC_dup27180	L1MdFanc_II_dup14421	RMER16-int_dup1261
MERVL-int_dup1043	MTA_Mm_dup6678	IAPEz-int_dup5444	IAPEz-int_dup1146	RLTR4_MM-int_dup2026	L1MdA_VII_dup7379	L1Lx_IV_dup8700	RMER12_dup148
MERVL_2A-int_dup668	ORR1A0_dup333	RSINE1_dup99662	RMER12_dup148	L1MC_dup4427	PB1D7_dup18437	L1_Mur2_dup9140	MLTR25C_dup49
ORR1D2_dup1290	RCHARR1_dup3334	IAPLTR1_Mm_dup1140	IAPLTR1_Mm_dup922	RLTR10_dup2124	RMER19B2_dup2127	L1MA4_dup3983	PB1D9_dup12564
L1MdF_IV_dup10802	IAPEz-int_dup1603	IAPEz-int_dup5420	L1MdFanc_I_dup246	L1MdF_III_dup1068	IAPLTR1_Mm_dup93	RLTR4_MM-int_dup3241	L1MdF_IV_dup8182
MMVL30-int_dup82	L1MdTf_III_dup4366	L1MdA_I_dup2679	L1MdTf_II_dup1887	L1MdTf_II_dup887	RLTR13C1_dup369	MamRTE1_dup1961	B1_Mus1_dup41091
MMERVK10D3_I_dup955	MERVL-int_dup648	IAPEz-int_dup2205	L1MC1_dup4820	L1MdFanc_II_dup5221	RLTR4_MM-int_dup8891	L1ME3Cz_dup51	RLTR4_MM-int_dup3240
IMPB_01_dup9201	L1MdA_II_dup4204	B1_Mus2_dup9384	RLTR4_MM-int_dup10340	L1MdV_III_dup2312	L1MdA_I_dup3677	RLTR10-int_dup1606	Lx3_Mus_dup8564
L1MdV_I_dup9080	L1MdTf_I_dup1908	IAPEz-int_dup2071	RSINE1_dup20536	RLTR45_dup1125	L1MdTf_I_dup1898	MTA_Mm_dup15493	IAPEy-int_dup198
L1MdTf_II_dup3673	L1MdA_III_dup7824	ORR1A2_dup5089	MTA_Mm_dup14370	IAP1-MM_I_dup30	B3A_dup41460	IAPEz-int_dup4095	RLTR19-int_dup985
MIR_dup17221	IAPEz-int_dup5165	B2_Mm2_dup53901	URR1A_dup1180	ERVB7_3-LTR_MM_dup289	L1MA4_dup3983	B4_dup51554	L1MdTf_II_dup1453
B1F2_dup7264	L1MdA_III_dup6821	MLTR11A_dup878	L4_A_Mam_dup561	LTRIS_Mus_dup667	L1MdA_II_dup1572	B1_Mus1_dup26857	MMERVK10D3_I_dup17
ETnERV-int_dup748	MurERV4-int_dup993	MTA_Mm_dup7995	B1F1_dup9665	RLTR10C_dup1291	ORR1A3-int_dup8921	L1MdA_VII_dup8158	MTEa_dup18054
L1MdFanc_II_dup5920	L1MdA_II_dup5	L1M4b_dup709	ERVB5_1-I_MM_dup100	B1F1_dup7083	MTC_dup20677	RLTR45-int_dup39	RLTR24_dup567
RLTR4_MM-int_dup3973	IAPEY3-int_dup1780	RLTR4_Mm_dup179	IAPEz-int_dup446	MMERVK10D3_I_dup955	L1MC4_dup5210	ORR1D2_dup2141	PB1D7_dup19707
L1MdN_I_dup1700	PB1D10_dup23662	MMVL30-int_dup70	IAPEz-int_dup7	IAPLTR2b_dup981	L1MdV_I_dup1620	L1MdTf_III_dup1911	MT2A_dup2344
MTB_dup6044	L1MdA_VII_dup4957	L1MdTf_III_dup1911	L1Lx_IV_dup12010	ORR1D2_dup1290	L1MdF_III_dup9940	L1MdN_I_dup1446	ERVB2_1-I_MM_dup2
IAP1-MM_I_dup30	L1MdMus_II_dup1410	ORR1A4_dup5380	L1MdTf_III_dup3107	L1M4_dup10113	RLTR19-int_dup984	RMER6A_dup1899	L1MdF_V_dup5056
B3_dup191	MIR_dup17227	L1MA4_dup3983	L1MdA_IV_dup2466	L1MdA_II_dup2766	B1F2_dup18036	L1MdF_I_dup7230	Lx_dup5095
L1_Mur2_dup7272	IAPEz-int_dup4009	L1MdTf_II_dup1790	RLTR13E_dup262	RLTR13C1_dup369	MERVL-int_dup1093	ORR1A4_dup8273	L1MdF_IV_dup7497
L1MdA_II_dup5267	L1MdGf_I_dup95	L1MdTf_I_dup829	ORR1B1_dup5741	Lx2B2_dup4330	MTE2b_dup15854	B2_Mm1t_dup25561	PB1D9_dup23325
L1MdTf_I_dup2095	L1MEf_dup774	L1MdA_I_dup130	MERVL-int_dup1987	ERVB4_2-I_MM_dup256	B2_Mm1t_dup23770	L1_Mur3_dup12008	L1MdF_IV_dup338
LTRIS_Mus_dup668	L1MdTf_III_dup1165	MIRb_dup41373	L1MdGf_I_dup2378	RLTR13E_dup434	L1MdF_III_dup6394	IMPB_01_dup3541	MIRb_dup27358
RLTR45-int_dup742	RLTR13A_dup194	B3A_dup25936	L1Lx_IV_dup9504	MTC_dup20677	RLTR6B_Mm_dup248	RLTR4_MM-int_dup9059	B2_Mm2_dup30649
MMERVK10D3_I_dup953	L1MdA_I_dup4252	MERVL_2A-int_dup2787	MTA_Mm_dup17300	Lx6_dup13943	RLTR4_Mm_dup172	B2_Mm1a_dup16876	L1MdGf_I_dup2928
ERVB7_1-LTR_MM_dup191	L1MdA_I_dup2083	ID_B1_dup11427	MMERVK9C_I_dup377	MTD_dup41575	RLTR10C_dup1291	ID_B1_dup107308	Charlie1_dup647
L1MdTf_III_dup2784	IAPEz-int_dup1610	MurSatRep1_dup559	Chap1_Mam_dup41	ORR1B1-int_dup50287	L1MdA_I_dup3485	L1Lx_I_dup455	MTD_dup12705
L1MdGf_I_dup1885	IAPEz-int_dup7159	IAPEz-int_dup2898	L1MdA_II_dup4030	L1MdA_III_dup2148	URR1A_dup15790	RLTR18B_dup111	Lx2A_dup1290
MTD_dup41575	L1MdGf_I_dup285	MLTR25A_dup344	RLTR33_dup838	Lx7_dup504	L1MdF_III_dup9945	L1Lx_II_dup1115	L1MB4_dup2798
ERVB4_2-I_MM_dup256	B2_Mm2_dup78933	IAPEz-int_dup8	IAPEz-int_dup1632	RMER6A_dup4010	MTA_Mm_dup6514	MTE2b_dup1959	B1_Mur4_dup1413
L1MdF_IV_dup19357	L1MdTf_II_dup2004	L1MdTf_II_dup2769	MTA_Mm_dup14825	Lx4A_dup831	ERVB5_2-LTR_MM_dup112	MTE2b_dup2801	B4A_dup7182
L1MdA_III_dup5798	IAPLTR1_Mm_dup1454	L1MdTf_I_dup210	L3b_dup125	L1MA9_dup3325	L1MdA_II_dup1568	ID4_dup15617	ID4_v_dup21205
Lx2B2_dup4330	PB1D10_dup60406	L1MdGf_I_dup1663	B4A_dup83174	RMER17C-int_dup793	IAPEz-int_dup5607	L1MdA_V_dup4078	ORR1B1_dup16537
RLTR13D3_dup19	RLTR4_MM-int_dup11959	L1MdN_I_dup557	L1MdGf_I_dup1980	Lx4B_dup1853	RLTR4_MM-int_dup4169	L1M2_dup14105	Lx5b_dup375
IAPLTR1_Mm_dup264	MERVL-int_dup1124	L1MdMus_I_dup10042	L1MC1_dup4867	MMERVK10C-int_dup2440	L1MdTf_I_dup187	ETnERV-int_dup753	Lx3B_dup2308
Lx7_dup504	L1MdTf_II_dup664	RLTR10_dup638	ORR1B1_dup14618	B1_Mus1_dup73551	B2_Mm1a_dup9594	MTE2b_dup15855	MLT1D_dup5473
MMERVK10C-int_dup195	Lx_dup5095	L1MdTf_III_dup3415	ORR1B1-int_dup6474	Lx3C_dup1451	IAPLTR2b_dup981	IAPEz-int_dup473	ID_B1_dup39242
L1MdA_I_dup3308	RMER15_dup2549	RLTR4_MM-int_dup11949	L1MdTf_II_dup3624	MMETn-int_dup686	MMERVK9E_I_dup1222	Lx5c_dup8124	RMER15_dup1282
RLTR20B5_MM_dup304	L2d2_dup3971	L1MdF_IV_dup1485	L1MdA_VII_dup3286	MMERVK10D3_I_dup953	B2_Mm2_dup61117	L1MdF_II_dup3580	PB1D10_dup14081
ERVB4_1B-LTR_MM_dup486	L1MdTf_II_dup2978	ORR1B1-int_dup30944	L1Lx_I_dup6522	MER113_dup230	IAPEz-int_dup2	MIRb_dup41373	MTEa_dup18053
MMERVK10C-int_dup2440	L1_Mur2_dup8713	L1MdA_III_dup6162	Lx7_dup2140	PB1D10_dup40558	B2_Mm1a_dup11435	L1MdA_I_dup2046	L1MC1_dup4820
RMER13A2_dup1329	L1MdTf_II_dup3170	L1MdA_III_dup6576	ERVB5_2-LTR_MM_dup112	MIR_dup28456	MMERVK10C-int_dup2440	L1M4b_dup709	L1MdFanc_I_dup9022
L1MdTf_II_dup3000	IAPEz-int_dup3863		L1MdA_IV_dup2465	B4A_dup39376	L1MdGf_II_dup2783	Lx6_dup3637	RLTR17B_Mm_dup55421
IAPEz-int_dup5455	L1MdTf_I_dup1629		MT2_Mm_dup722	Lx5b_dup2858	RLTR13D3_dup19	RLTR19-int_dup982	MRLTR33_dup240
MTA_Mm_dup10455	B2_Mm2_dup6325		RLTR4_MM-int_dup10070	MMSAT4_dup80	ORR1A1_dup395	ORR1A4_dup6575	B1_Mus1_dup32918
IAPEz-int_dup474	Lx7_dup31635		IAPEz-int_dup4975	B3A_dup35753	L1MdGf_II_dup1496	MurSatRep1_dup124	B2_Mm2_dup1834
RLTR10_dup1993	MERVL-int_dup1462		MMERVK10D3_I_dup843	RMER21A_dup322	IAPLTR3-int_dup1660	L1MdF_IV_dup1485	ORR1A4_dup6575
L1MdA_II_dup4411	MT2_Mm_dup335		ETnERV3-int_dup597	L1MdV_III_dup3941	IAPEz-int_dup7111	MTE2b_dup16010	Lx5b_dup5888
L1MdF_III_dup9945	IAPEz-int_dup1049		L1MdMus_II_dup192	B3_dup113342	L1MdA_I_dup1216	MIR3_dup1891	L1Lx_IV_dup9504
L1M4_dup10113	IAPEz-int_dup6887		L1_Mur2_dup5061	L1_Mur1_dup2431	RLTR13A_dup189	B2_Mm2_dup86270	L1MdTf_I_dup211
L1_Mur2_dup14584	L1MdA_II_dup2831		Lx2B2_dup102	L1MC2_dup180	B2_Mm1t_dup16691	RLTR4_MM-int_dup3240	ORR1E_dup16844
Lx2B2_dup763	RLTR19-int_dup249		Lx_dup966	L1MdTf_II_dup100	IAPEz-int_dup6327	B2_Mm2_dup10693	B3_dup2974
Lx3_Mus_dup8565	L1MdA_I_dup719		L1MdA_III_dup282	L1MdA_I_dup1867	L1MA5_dup2525	PB1D10_dup61331	MMERVK10D3_I_dup1110
B3_dup20864	RLTR4_MM-int_dup9988		RMER16-int_dup1263	MTB_dup6044	MERVL-int_dup1090	UCON44_dup20	ERVB5_1-I_MM_dup99
IAPLTR2b_dup980	RLTR4_MM-int_dup11961		MTEa_dup18530	B4A_dup75996	RMER12C_dup8507	MTE-int_dup4754	B1F2_dup14776
B1_Mm_dup31716	MERVL_2A-int_dup687		PB1D7_dup22150	L2_dup3897	ORR1C2_dup10473	RMER19C_dup2991	Lx6_dup1289
Lx3C_dup772	L1MdTf_I_dup496		L1_Rod_dup10655	RLTR10C_dup1293	L1MC1_dup4820	B3A_dup68587	LTR108a_Mam_dup1
B1_Mus1_dup73551	MERVL-int_dup161		ID_B1_dup59452	LTRIS_Mus_dup668	MER20B_dup283	L1MC4_dup5210	RLTR45-int_dup42
L1MdA_III_dup2582	ERVB4_1C-LTR_Mm_dup177		B3A_dup87769	RCHARR1_dup4976	MT-int_dup223	ORR1A2_dup16532	L1Lx_IV_dup12008
L1MdF_III_dup9942	PB1D9_dup19888		MurSatRep1_dup229	L1_Mur3_dup17189	ORR1D1_dup22708	IAPEz-int_dup7372	L1MdV_III_dup9182
MTA_Mm_dup4492	MER21B_dup1260		IAPEz-int_dup5379	ID4_v_dup9737	IAPEz-int_dup6666	B4A_dup95646	L1MdA_I_dup1279
MERVL_2A-int_dup2731	L1MdTf_I_dup1627		RLTR13G_dup786	MMERVK10C-int_dup2441	L1MdTf_II_dup624	RLTR13B1_dup22	L1MdFanc_II_dup5220
PB1D10_dup27642	L1MdA_V_dup2185		L1ME2z_dup1046	MTC_dup1966	IAPEz-int_dup4168	L1_Rod_dup11241	L1Lx_IV_dup187
B4_dup47795	MTA_Mm_dup4643		IAPLTR1_Mm_dup270	RLTR45-int_dup741	L1MdV_II_dup9028	L1MdTf_III_dup4490	L1MdA_IV_dup5838
MERVL-int_dup658	B1_Mur1_dup30456		RLTR4_MM-int_dup9529	MERVL-int_dup593	UCON14_dup29	RLTR10_dup2385	MIR_dup17215
MIR_dup28455	L1MdA_II_dup4394		L1MdGf_I_dup354	MT2B1_dup6041	RLTR45-int_dup38	B2_Mm1t_dup16834	B4A_dup96176
B1_Mur4_dup10693	L1MdTf_II_dup2413		MurERV4_19-int_dup318	MurERV4-int_dup172	PB1D10_dup40558	L1Lx_IV_dup8695	MMERVK10D3_I_dup843
L1MdA_II_dup764	L1MdA_I_dup3168		LTRIS2_dup1200	RMER16-int_dup1261	RLTR19-int_dup249	Lx5_dup7343	MIRb_dup29544
IAPEY3-int_dup1780	L1MdA_II_dup3928		ORR1D1_dup3129	IAPEz-int_dup5539	L1MdA_III_dup5007	RSINE1_dup6681	L1M4_dup10117
L1MdA_I_dup4269	IAPEz-int_dup1269		B2_Mm1a_dup1284	IAPEY3-int_dup1780	ERVB5_1-I_MM_dup99	L1MA7_dup167	MIRb_dup10982
PB1D10_dup47455			IAPEz-int_dup3087	MTA_Mm_dup9010	Lx6_dup8838	MTD_dup3234	ID_B1_dup72948
MTA_Mm_dup14241			MMERVK10D3_I_dup17	L1_Mur2_dup14583	RLTR6B_Mm_dup527	MurSatRep1_dup2115	B3_dup48186
L1MdTf_III_dup1444			L1MdV_III_dup3297	MYSERV-int_dup142	ERVB4_2-I_MM_dup256	L1MdV_III_dup9182	URR1B_dup1216
RLTR10C_dup1293			L1MdA_I_dup1282	L3b_dup1856	MMVL30-int_dup990	L1Lx_I_dup1177	Lx_dup965
L1MdA_III_dup1110			L1MdA_III_dup2718	MER34B-int_dup25	L1MdTf_II_dup1071	L1MdTf_III_dup1988	B3_dup40937
RLTR31M_dup82			RLTR17D_Mm_dup984	L1MdA_I_dup552	MMERVK10C-int_dup2186	L1_Mur3_dup1464	Lx6_dup1290
L1MdA_II_dup3182			L1MdA_I_dup1088	L1MdF_IV_dup19357	PB1D10_dup61331	ORR1C2_dup13571	L1Lx_IV_dup12010
L1MdA_I_dup2006			B3A_dup9047	L1M3b_dup131	L1MdF_III_dup9942	L1MdF_IV_dup19358	MMVL30-int_dup518
MERVL-int_dup1012			L1MdMus_II_dup1386	L1MdA_I_dup3055	IAPEz-int_dup6594	RLTR4_MM-int_dup3456	B3A_dup40822
L1MdFanc_II_dup5914			L1MdA_I_dup3410	L1MdA_I_dup1065	MurSatRep1_dup166	B1F_dup19167	MIRc_dup1960
IAPEz-int_dup7380			L1MdTf_I_dup788	MMERVK10C-int_dup1309	L2_dup17415	B1F_dup19349	L1MdF_IV_dup19358
RSINE1_dup60119			RLTR4_MM-int_dup6233	IAPEz-int_dup2188	IAPEz-int_dup4717	L2d2_dup3393	Lx_dup966
B2_Mm2_dup58222			Lx8_dup17830	L1Lx_III_dup237	L1MdTf_II_dup255	MTD_dup15479	RMER19B_dup4729
RLTR4_MM-int_dup4788			L1MdGf_II_dup5805	RMER15_dup13313	L1MdA_II_dup3911	MTD_dup15466	ORR1A2_dup13642
ID_B1_dup38117			IAPEz-int_dup4410	L1MdTf_I_dup1289	IAPEz-int_dup5758	PB1D9_dup28489	RLTR4_MM-int_dup3238
RLTR4_MM-int_dup978			L1MdA_II_dup307	B3A_dup35752	RLTR4_MM-int_dup9503	MTD_dup54162	L1_Rod_dup10655
L1MdA_I_dup2462			Lx6_dup258	PB1D7_dup18437	Lx3C_dup493	IAPEz-int_dup4210	L1Lx_IV_dup9679
L1MdA_III_dup4055			PB1D10_dup52261	ERVB4_1B-I_MM_dup1150	Charlie30a_dup135	L1MdTf_II_dup399	ORR1B1_dup14618
B2_Mm1a_dup8656			Lx_dup11488	MTD_dup4140	IAPEz-int_dup7080	L1MdF_V_dup5213	ERVB5_1-I_MM_dup100
L1MdA_I_dup752			L1MdGf_I_dup1628	IMPB_01_dup9201	RLTR13G_dup690	ORR1D1_dup17524	L1M4_dup10116
IAPEz-int_dup2946			L2d2_dup3971	RLTR4_MM-int_dup10201	MER20B_dup281	IAPEz-int_dup3330	L1MdV_III_dup10651
L1Lx_IV_dup12010			Charlie1_dup646	MTEa_dup13998	RLTR4_MM-int_dup9917	PB1D10_dup59312	LTRIS3_dup120
L2a_dup17466			IAPLTR1_Mm_dup825	L1MC1_dup4820	ERVB5_2-LTR_MM_dup113	MurSatRep1_dup243	L1MdF_I_dup366
L1MdA_III_dup7474			L1MdTf_II_dup3468	Lx5_dup6648	B3A_dup41462	RMER6A_dup1663	B1_Mur3_dup5958
IAPEz-int_dup4824			MER70A_dup61	PB1D10_dup61331	MMVL30-int_dup982	L1Lx_IV_dup9504	Lx_dup15558
Lx2B2_dup4329			L1_Mur2_dup7929	MER33_dup1498	URR1B_dup1216	ORR1A2_dup16529	L1MdTf_II_dup671
L1MdFanc_II_dup11459			B3_dup130484	MIR3_dup11615	L1MdGf_I_dup1882	RMER13A_dup19	PB1D10_dup41470
L1MdF_III_dup1068			IAPLTR2_Mm_dup162	L1MdMus_I_dup4780	L1MdF_IV_dup19357	Lx7_dup13648	ORR1A2_dup8200
L1MdA_III_dup3774			ORR1D1_dup22883	L1_Mur2_dup14584	L1MdF_III_dup12535	IAPLTR1_Mm_dup1661	L1MdF_III_dup5149
Lx2_dup7089			L1MdTf_III_dup1772	B1F2_dup18036	L1MC1_dup4821	MERVL-int_dup1248	PB1D7_dup22152
RMER12C_dup968			L1MdTf_II_dup2639	L1MdMus_I_dup943	MMERGLN-int_dup187	L1MC_dup4427	B4_dup58058
IAPEz-int_dup1244			Lx9_dup607	L1MdF_V_dup5673	L1MdA_VI_dup9714	L1_Rod_dup6394	L3_dup8123
IAPEz-int_dup4628			B3A_dup31904	L1MdFanc_I_dup4423	L1MdA_I_dup2089	ID4_v_dup8173	L1Lx_IV_dup880
RLTR4_MM-int_dup1610			B1_Mus1_dup8608	B1_Mm_dup31716	MTA_Mm_dup16461	L1MdFanc_II_dup561	L1Lx_IV_dup12011
L1Lx_IV_dup12011			B1_Mus1_dup92953	L1MdFanc_II_dup5219	MTA_Mm_dup3697	MTA_Mm_dup8726	RLTR45-int_dup21
B1_Mur3_dup23265			BGLII_dup1145	RLTR10_dup2149	MTA_Mm_dup2782	L1MdTf_II_dup2636	L1MdN_I_dup1700
RMER6C_dup1257			IAPEz-int_dup3568	L1MdFanc_II_dup5538	B2_Mm1a_dup5787	RLTR4_Mm_dup179	Lx7_dup25962
MTC_dup20677			L1MdA_I_dup42	L1MdA_II_dup79	MurSatRep1_dup1838	L1Lx_IV_dup1510	L3b_dup125
L1MdF_I_dup1701			L1MA6_dup4838	L1Lx_IV_dup12011	RLTR6_Mm_dup93	L1MdA_VI_dup9763	IAPLTR1_Mm_dup1099
L1MdA_I_dup657			L1MdTf_I_dup1010	RMER6C_dup3478	L1MdTf_II_dup935	L1MdTf_III_dup139	RLTR4_MM-int_dup11590
Lx2_dup4660			Lx3_Mus_dup8564	L1MdF_III_dup9942	B2_Mm1a_dup14068	B1_Mus2_dup36911	B4A_dup22040
L1ME4a_dup622			L1_Mur3_dup7524	L1MdF_IV_dup19358	IAPEz-int_dup2358	L1MdA_I_dup3466	Lx_dup15557
Lx2B2_dup8474			L1MdFanc_I_dup8142	MTC_dup26296	L1MdTf_III_dup4549	B1_Mus1_dup11683	Tigger13a_dup541
IAPEz-int_dup4652			ID_B1_dup11420	L1MdGf_II_dup3059	MTC_dup26296	L1Lx_IV_dup5288	L1MdF_IV_dup14179
ID_B1_dup84099			L1MdF_III_dup4375	RLTR10C_dup1290	Lx5_dup1132	MurSatRep1_dup559	L1MdFanc_I_dup8142
MT2B1_dup6041			MMERVK9C_I_dup375	L1MdA_VI_dup7708	L1MdFanc_II_dup5537	L1MdGf_II_dup4038	L1MdA_VII_dup3227
MIR_dup28456			L3_dup7564	IAPLTR4_I_dup180	B2_Mm1a_dup15799	MERVL-int_dup1721	L1MA7_dup3087
Lx6_dup13943			Lx8_dup42697	B1_Mus1_dup95386	L1MdGf_I_dup2146	IAPEY4_I_dup122	LTR81C_dup50
RLTR6B_Mm_dup222			L1MdGf_II_dup32	L1MdA_II_dup1728	L1MdTf_II_dup498	MYSERV6-int_dup2364	B2_Mm2_dup18939
L1MdTf_II_dup1268			MIRb_dup39777	L1MdF_III_dup1069	MamRTE1_dup3918	L1M3d_dup253	L1MdA_II_dup4030
B3_dup20856			Lx10_dup9637	B1_Mus1_dup73545	L1MdF_V_dup10756	Lx8_dup52305	L1MdF_V_dup10852
L1MdF_III_dup1798			L1MdGf_I_dup2474	L1MdV_III_dup9182	ETnERV-int_dup224	X13_LINE_dup24	ORR1D1_dup2997
RLTR10-int_dup789			RLTR19-int_dup167	MTB_dup7947	MTB_dup7946	MamRep38_dup152	MMERVK9E_I_dup797
L1MdGf_I_dup1378			L1MdF_V_dup194	L1MdV_I_dup4542	RCHARR1_dup3334	L1MdA_VI_dup184	MLTR18D_MM_dup542
L1MdF_V_dup5671			MIRb_dup1982	RLTR4_MM-int_dup10165	RLTR4_MM-int_dup578	MMERVK9E_I_dup1222	MTD_dup35124
L1MdTf_III_dup2918			L1MdA_V_dup1304	ERVB4_1B-LTR_MM_dup486	MTEa_dup17069	IAPEz-int_dup1706	L1MdF_IV_dup4739
L1MdA_I_dup3325			L1MdTf_I_dup1628	L1MdFanc_II_dup11459	RLTR45-int_dup63	IAPEz-int_dup1507	MTA_Mm_dup17300
L1Lx_IV_dup9504			ETnERV2-int_dup574	L1MdA_I_dup2152	L1MdTf_II_dup3409	L1MdFanc_I_dup8034	MamRTE1_dup3617
Lx_dup5921			MTA_Mm_dup13412	RLTR4_MM-int_dup4788	MT2_Mm_dup312	B4_dup29082	Lx8b_dup22421
IAPEz-int_dup6200			L1MdA_II_dup5094	PB1D9_dup28466	L1M4_dup10113	B2_Mm2_dup61117	ORR1D2_dup12721
MERVL_2A-int_dup2712			B1_Mur1_dup28493	L1MdF_II_dup3345	IAPEz-int_dup3863	PB1D7_dup1511	MMERVK10C-int_dup1309
RLTR4_MM-int_dup9553			MTD_dup507	MTA_Mm_dup4054	L1MdTf_III_dup1345	B1_Mus2_dup23927	RMER19C_dup1278
L1Lx_IV_dup12012			MTE2b_dup12790	B2_Mm2_dup66027	MTA_Mm_dup17720	L1MdV_III_dup740	MMERVK10D3_I_dup16
RMER1A_dup1603			Lx5_dup12108	ORR1C2_dup10473	Lx5c_dup7923	IAPLTR2b_dup391	ORR1A1_dup77
L1MdF_III_dup2973			IAPEz-int_dup1706	L1Lx_IV_dup12012	Lx9_dup32017	L1Lx_IV_dup12009	RMER6C_dup2344
IAPLTR1_Mm_dup760			L1MdF_III_dup5148	MERVL_2A-int_dup2206	RLTR10-int_dup1927	IAPEz-int_dup2465	Lx2B_dup91
L1MdTf_I_dup197			L1M2_dup10417	MTB_dup7944	Lx5c_dup16363	RLTR4_MM-int_dup1946	Lx5_dup12809
RLTR10_dup1112			MERVL-int_dup390	RLTR10-int_dup1927	IAPLTR2_Mm_dup1442	L1MdF_I_dup3143	RLTR42-int_dup661
L1Lx_III_dup237			L1MdA_V_dup1263	PB1D9_dup28461	IAPEz-int_dup2022	L1MdV_I_dup2251	L1MdA_VI_dup3129
ORR1A2_dup4099			IAPEz-int_dup780	L1MdTf_III_dup3469	IAPEz-int_dup7296	L1Lx_I_dup7589	IAPEz-int_dup779
Lx6_dup7425			L1MdN_I_dup138	IAPLTR4_dup558	L1MdGf_I_dup1294	L1MdA_II_dup546	MTEa_dup2800
L1MdA_III_dup3854			PB1D11_dup3781	L1MdF_V_dup10756	L1MdGf_II_dup2427	L1MdF_V_dup4667	L1MdV_III_dup8974
L1_Mur2_dup7275			IAPEz-int_dup809	MMERVK10C-int_dup195	Lx8_dup37782	L1MdN_I_dup772	RLTR21_dup638
L1MdTf_I_dup615			L1MdTf_I_dup1581	L2_dup3879	RLTR4_MM-int_dup9059	MTB_dup7531	PB1D11_dup3781
L1MdA_VII_dup2292			MurSatRep1_dup207	L1MdTf_I_dup648	RLTR30D_MM_dup165	IAPEY4_I_dup121	L1MdA_VII_dup8158
			L1MB4_dup2014	RLTR13B1_dup886	B2_Mm1t_dup6081	L2a_dup2524	B3A_dup87277
			L1_Mur1_dup5459	MTA_Mm_dup13347	Lx3A_dup8931	L1MdMus_I_dup107	OldhAT1_dup1509
			IAPEz-int_dup5417	L1M4_dup10114	L1MEg_dup1629	MIR_dup37097	RLTR14_dup771
			L1Lx_I_dup3	Lx2B2_dup8474	MTD_dup54116	MER34B-int_dup25	MER21B_dup1232
			PB1D7_dup22151	MTC_dup27180	L1MdA_III_dup661	MERVL-int_dup2006	RLTR17D_Mm_dup984
			L1MdTf_I_dup1728	PB1D7_dup9644	RLTR4_MM-int_dup10165	IAPEz-int_dup479	B3_dup77530
			MER34A_dup573	L1MdF_III_dup9940	IAPEz-int_dup4466	B2_Mm1a_dup1990	IAPEz-int_dup1709
			L1Lx_IV_dup880	L1MdGf_I_dup1216	B2_Mm1a_dup6214	L1MdA_I_dup3288	ERVB5_2-LTR_MM_dup112
			L1MdA_II_dup3750	ORR1B1-int_dup25418	RMER19B_dup3072	MTB_dup874	Lx3_Mus_dup8623
			L1MdF_I_dup7779	ORR1C2_dup13571	RMER19B2_dup2129	RLTR10_dup2386	ID_B1_dup96923
			B4A_dup41855	IAPEz-int_dup7513	L1MdF_I_dup4179	ERVB4_1-I_MM_dup419	L1MdA_IV_dup2466
			B2_Mm2_dup37055	MIR_dup28455	L1MdFanc_II_dup1988	L1MdN_I_dup1700	L1MdF_I_dup3812
			IAPEz-int_dup3813	L1Lx_IV_dup9504	B2_Mm1a_dup12733	B2_Mm1t_dup23990	ID_B1_dup100113
			B4_dup21150	L1MdV_III_dup7814	MTB_dup7945	RLTR20B1_dup141	MER5A_dup3171
			B2_Mm1a_dup17824	PB1D10_dup24395	MT2_Mm_dup2399	ETnERV2-int_dup1529	IAPEz-int_dup5049
			L2a_dup909	L1MdFanc_II_dup5914	RLTR45-int_dup39	MTB_Mm_dup5442	L1Lx_III_dup13220
			ORR1F_dup3131	Lx2_dup7092	L1MdA_II_dup529	MurSatRep1_dup2114	L1MdMus_II_dup4551
			L1MdTf_III_dup1039	RLTR10A_dup567	MMERVK10C-int_dup1580	B3A_dup63759	L1MdA_II_dup1676
			MTA_Mm_dup11711	B4_dup47795	IAPEz-int_dup5935	B3_dup142200	MER2_dup8985
			MIR_dup23929	Lx2B2_dup4329	L1MdTf_III_dup2874	RLTR10-int_dup1003	MTE2b_dup15852
			Lx8_dup598	B1_Mur3_dup23267	ETnERV3-int_dup597	LTRIS2_dup148	ORR1A1_dup395
			L1MdF_III_dup6394	IAPLTR2b_dup980	L1MdA_I_dup1867	MER20B_dup283	RMER15_dup10189
			L1_Mur2_dup221	L1MdTf_III_dup3979	B1_Mm_dup37346	L1MdV_II_dup341	L3_dup7564
			L1MdTf_I_dup376	L1MdA_I_dup1453	RLTR4_MM-int_dup10201	MIR3_dup6971	L1MA4_dup3983
			RMER6-int_dup245	B3_dup113340	L1MdTf_II_dup2310	ID_B1_dup107310	B4_dup44912
			ORR1F_dup20840	L1MdA_II_dup759	IAPEz-int_dup7538	PB1D9_dup28488	RLTR19-int_dup820
			B1F_dup2151	B4A_dup98579	MERVL-int_dup108	B1_Mus2_dup846	L1MdV_II_dup3212
			L1MdA_I_dup3350	RLTR20A2B_MM_dup461	MTEa_dup853	L2a_dup1132	IAPEy-int_dup61
			MERVL-int_dup1570	MurSatRep1_dup207	ETnERV2-int_dup1529	Charlie24_dup129	RLTR17B_Mm_dup3311
			L1MdV_II_dup199	L1MdA_III_dup8413	L1MdGf_I_dup588	L1M4_dup5338	RLTR13C1_dup369
			RMER15_dup13437	L1MdTf_I_dup674	MER20B_dup282	IAPEz-int_dup1733	L1MdF_III_dup12535
			IAPEz-int_dup1317	B4A_dup76000	RLTR10-int_dup1057	L1ME3A_dup111	RMER13B_dup1867
			RLTR4_MM-int_dup510	L1MdTf_III_dup3168	L1MdA_I_dup235	Lx_dup14113	Zaphod2_dup11
			IAPEz-int_dup2138	L1MdA_II_dup2537	B4A_dup98541	L1MdF_IV_dup596	L1M5_dup12800
			ORR1C2_dup9904	Lx5_dup6647	L1MdA_II_dup4924	MERVL-int_dup1668	L1MB8_dup3704
			L1MdA_II_dup3913	MTB_Mm_dup3977	L1MdGf_I_dup987	L1MdA_VI_dup609	B1_Mur1_dup22066
			B3A_dup73793	RLTRETN_Mm_dup909	L1MdA_I_dup3530	L1M2_dup6635	L1_Mur3_dup1464
			Lx2_dup1429	L1MdTf_II_dup1298	MIRc_dup20079	RLTR45-int_dup394	L1MB8_dup4999
			B1_Mur1_dup1996	RLTR4_MM-int_dup9917	Lx2A_dup1290	MERVL-int_dup1393	L1Lx_I_dup3903
			ID_B1_dup103686	L1Lx_II_dup1848	L1ME3A_dup1541	B1F2_dup17420	ORR1A0_dup319
				L1MdGf_II_dup5628	ORR1A4_dup8173	MurSatRep1_dup554	Lx7_dup13642
				RMER19B2_dup2129	IAPEz-int_dup89	B1_Mur1_dup7930	RSINE1_dup6681
				B2_Mm2_dup86268	IAPEz-int_dup5379	B4A_dup19857	L1_Mur2_dup221
				L1MdTf_II_dup2447	L1MdTf_II_dup2196	Lx3_Mus_dup3164	L1Lx_II_dup418
				L1Lx_II_dup1849	B2_Mm1a_dup9447	ORR1F_dup5450	ZP3AR_dup2221
				IAPEY3_LTR_dup500		RLTR15_dup2259	L1MdMus_II_dup192
				HAL1_dup2109		MER21C_dup1901	PB1D7_dup9644
				IAP1-MM_LTR_dup41		B4_dup61834	Lx6_dup1288
				MTB_dup8284		RLTR16B_MM_dup76	L1MdA_II_dup1659
				Lx3_Mus_dup8565		MTE2b_dup423	B3_dup78616
				IAPEz-int_dup4030		MERVL-int_dup390	B3_dup57934
				ORR1A3-int_dup10201		MIR3_dup2666	L1MdA_IV_dup2465
				OldhAT1_dup2992		L1MdV_III_dup369	RSINE1_dup41078
				L1MdA_III_dup7258		L1MdGf_II_dup5782	L1Lx_IV_dup12012
				URR1A_dup7034		B2_Mm2_dup84653	MT2B2_dup1297
				ERVB7_1-LTR_MM_dup159		B3A_dup90086	L1MC2_dup629
				L1MdTf_III_dup2780		L1MdF_IV_dup5540	L1Lx_IV_dup4801
				B4A_dup98540		Lx_dup438	ORR1A2_dup6768
				L1MdF_V_dup5671		MurSatRep1_dup202	L1MA9_dup3357
				ORR1E_dup16710		OldhAT1_dup2774	B2_Mm1a_dup6557
				L1MdA_I_dup2422		Lx3_Mus_dup4543	L1MEg_dup1627
				L1MdA_II_dup1049		L1MdTf_III_dup881	IAPEz-int_dup4410
				L4_A_Mam_dup39		ORR1B1_dup6404	Lx3_Mus_dup152
				B2_Mm2_dup58222		IAPEz-int_dup6223	Lx3A_dup6694
				MTA_Mm_dup17719		L1_Rod_dup10497	ORR1D1_dup21692
				Lx5_dup6646		MTE2b_dup5023	L1M4_dup10113
				ORR1A0_dup333		L1MA9_dup1467	L1MdA_I_dup2273
				B3A_dup90068		RLTR4_MM-int_dup12096	IMPB_01_dup7738
				LTR16D_dup133		L1MdFanc_II_dup2786	B1_Mus1_dup78006
				B3_dup113337		RLTR4_MM-int_dup11949	L1Lx_II_dup108
				RLTR19-int_dup593		MMERVK10C-int_dup3057	RLTR10D2_dup127
				URR1B_dup10571		IAPLTR1a_Mm_dup947	IAPLTR2_Mm_dup162
				ID_B1_dup34145			B3_dup105568
				B1F_dup27433			B2_Mm2_dup61117
				L1MdA_II_dup2185			Lx8_dup42698
				B1F_dup16480			MERVL-int_dup231
				Lx5_dup6650			L1MdF_IV_dup8268
				L1MDa_dup189			Lx6_dup14106
				B3_dup113338			MTE2b_dup15293
				L1MdTf_I_dup1141			L1MdF_III_dup991
				L1MdF_II_dup3682			Charlie1_dup646
				Lx_dup15558			MT2_Mm_dup1409
				B1_Mm_dup31715			Lx5_dup12810
				RMER19B2_dup2128			L1MdA_VI_dup1396
				ERVB4_2-I_MM_dup255			L1MdF_IV_dup1263
				B2_Mm1a_dup13829			L1MdV_II_dup199
				PB1D9_dup28489			Lx6_dup258
				MTA_Mm_dup14241			MTA_Mm_dup9092
				MT-int_dup366			Lx8_dup33115
				MERVL-int_dup1669			B1_Mm_dup14720
				IAPEz-int_dup2109			BGLII_dup1145
				Lx7_dup1576			ID4_v_dup4461
				IAPLTR4_dup557			RLTR40_dup1134
				L1MdGf_I_dup2927			PB1D9_dup21768
				L1MdFanc_I_dup256			RLTR4_MM-int_dup1847
				Lx_dup3439			L1Lx_IV_dup9681
				B1_Mur4_dup8937			RLTR15_dup1202
				Lx2_dup15986			L1MdF_IV_dup7892
				L1MdTf_III_dup771			Lx6_dup1196
				L1Lx_IV_dup12007			ORR1B1-int_dup60094
				L1MdFanc_II_dup323			MIR_dup1370
				L1MdTf_II_dup2381			Lx9_dup44828
				Lx9_dup17922			B2_Mm2_dup18937
				L1_Mur1_dup2616			L1MC1_dup4867
				RLTR4_MM-int_dup2644			ORR1E_dup1015
				L1MdGf_I_dup2978			RLTR13E_dup262
				L1Lx_III_dup1100			L1MdMus_I_dup775
				MER90a_dup323			Lx10_dup10230
				L1MA6_dup4534			B1_Mus1_dup18160
				RMER13A2_dup1329			MER21B_dup1265
				RMER15-int_dup1209			L1MdF_I_dup4216
				MTD_dup41574			MTB_dup303
				L1MdA_II_dup5004			L1MdF_IV_dup19359
				L1MdGf_I_dup751			L1MdF_I_dup3192
				MTE2b_dup15855			MER34A_dup573
				IAPEY3_LTR_dup501			B1_Mur1_dup39013
				RLTR6B_Mm_dup527			RMER4A_dup962
				Lx9_dup17921			RLTR1B_dup301
				L2_dup17415			ORR1A0_dup1386
				Lx3C_dup2530			RLTR14_dup30
				PB1D7_dup9171			Lx2B_dup4854
				URR1A_dup18159			L1Lx_IV_dup6128
				ID_B1_dup84099			Lx2_dup1429
				L1MC4_dup5210			Lx8_dup37782
				B1_Mur1_dup40344			MTE2b_dup15850
				L1MdTf_I_dup1234			Lx7_dup13638
				RMER20B_dup731			Lx9_dup16579
				L1MdGf_II_dup6811			L1MdA_I_dup3765
				PB1D10_dup27810			L1MdF_IV_dup19357
				B3A_dup58381			B2_Mm2_dup18938
				L1MdA_VI_dup2873			Lx7_dup23543
				ORR1A4_dup6297			ID_B1_dup39195
				B3A_dup69561			L1MdGf_II_dup4429
				Lx5_dup1132			MTA_Mm_dup3488
				L1MdV_III_dup11373			L1MdTf_III_dup1251
				IAPEz-int_dup1295			ID_B1_dup39197
				L1MdA_I_dup2462			B3A_dup74036
				RLTR10_dup2472			Lx8b_dup24437
				B2_Mm2_dup37049			B2_Mm2_dup1067
				RMER15_dup13312			ETnERV-int_dup143
				L1MdF_III_dup9946			RMER16-int_dup1263
				MERVL-int_dup57			L3_dup2204
				L1_Mur1_dup2433			B3A_dup30763
				ETnERV-int_dup353			Lx8_dup39500
				L1MdF_II_dup1411			L2_dup17303
				B2_Mm2_dup86270			RMER19B2_dup2128
				L1_Mur2_dup8710			L1Lx_II_dup5595
				L1Lx_IV_dup1037			MIRb_dup1974
				L1MdTf_I_dup623			MTE2b_dup10882
				L1MdA_VI_dup3754			MMERVK10D3_I_dup307
				L1MdV_I_dup4945			URR1A_dup8146
				L1Lx_IV_dup3395			MTD_dup11321
				B1_Mur4_dup10735			Lx_dup14816
				Lx9_dup17925			RLTR17D_Mm_dup422
				B4_dup47797			RSINE1_dup31555
				L1MdF_II_dup1365			L1MdA_I_dup4579
				RLTR13B1_dup238			RMER15_dup7324
				L1MdTf_I_dup2085			L1MA8_dup2434
				B3_dup113335			MIR_dup23929
				LTRIS_Mus_dup666			ORR1F_dup19004
				L1MdF_II_dup1382			L1MdGf_I_dup1611
				RMER12C_dup8507			B1F1_dup7083
				ID_B1_dup73555			L1MdF_IV_dup9367
				L1ME4a_dup622			L1Lx_I_dup12352
				Lx9_dup8206			RCHARR1_dup2463
				PB1_dup11620			MIR_dup16234
				L1MdA_IV_dup1174			L4_A_Mam_dup561
				ID_B1_dup107308			ORR1B1_dup14621
				B1_Mur3_dup23268			L3_dup6037
				ORR1D1_dup22708			PB1D10_dup52261
				L1MdTf_III_dup3142			Lx_dup181
				PB1D10_dup59306			RMER17C-int_dup979
				L1MdMus_I_dup2890			MTB_dup7946
				L1MdTf_I_dup2193			B3_dup130484
				MYSERV6-int_dup1100			PB1D11_dup4614
				MERVL_2A-int_dup3047			RLTR10D2_dup126
				L1_Mur2_dup8713			MMERVK9E_I_dup1222
				Lx3C_dup2436			B4A_dup99658
				RLTR1C_dup208			L1MdF_V_dup194
				L1MdA_III_dup5939			MTD_dup19154
				Lx6_dup7429			Kanga11a_dup64
				ORR1B1_dup5914			RMER19B_dup4734
				MTB_Mm_dup76			L1Lx_I_dup3
				RLTR6B_Mm_dup223			IAPEz-int_dup3552
				L1MdGf_I_dup827			ORR1D1_dup22883
				B1_Mus1_dup73550			B4_dup9416
				RLTR4_MM-int_dup3679			RMER19C_dup2312
				Lx8b_dup6057			B3A_dup70255
				MTD_dup52706			URR1A_dup1180
				B3_dup145690			B1_Mus1_dup92953
				L1MdF_IV_dup5538			B1_Mus1_dup65299
				L1MdA_I_dup1901			L2_dup1413
				L1MdA_I_dup1895			IMPB_01_dup12576
				PB1D11_dup15310			L1Lx_III_dup13862
				L1MdFanc_II_dup14421			B4A_dup83174
				PB1D7_dup23763			L2b_dup13062
				RMER12C_dup4222			L1MdTf_III_dup431
				IAP1-MM_I_dup31			L1MdF_III_dup6394
				L1MdF_IV_dup4971			OldhAT1_dup936
				L1MdTf_III_dup2939			B3_dup1840
				IAP1-MM_I_dup13			B4_dup59502
				L1MdMus_II_dup3095			ORR1E_dup6219
				L1MdTf_I_dup1195			L1MdGf_I_dup169
				MMERVK10D3_I_dup842			Chap1_Mam_dup41
				LTRIS4A_dup20			MTA_Mm_dup17203
				MT2_Mm_dup2571			MMVL30-int_dup230
				ETnERV-int_dup880			MIR3_dup7536
				L1MdGf_II_dup7780			Lx5_dup12811
				L1MdTf_I_dup276			MMERVK10C-int_dup395
				L1M4_dup10116			MMERVK10C-int_dup1454
				PB1D11_dup8198			L1MdGf_II_dup3461
				L1MdA_III_dup1110			B2_Mm2_dup68678
				RLTR20C1_MM_dup5551			L1MA6_dup4838
				ORR1A3-int_dup8921			L1MdF_III_dup12644
				L1MdFanc_II_dup5920			L1Lx_I_dup8
				ORR1B1_dup5917			MIR1_Amn_dup3928
				IAPEz-int_dup5174			L1ME2z_dup1046
				ORR1B1-int_dup59004			RSINE1_dup27574
				L1MdA_II_dup3859			B3_dup123196
				B2_Mm2_dup86229			L1MdF_I_dup9559
				MERVL-int_dup1084			L1MdV_III_dup11560
				Lx7_dup8778			B3A_dup25936
				RMER12B_dup472			RMER20A_dup113
				URR1A_dup9932			ORR1B2_dup3585
				ERVB4_2-I_MM_dup28			ORR1B1-int_dup25418
				L1MA5_dup2525			UCON14_dup29
				IAPEz-int_dup6921			Lx2_dup6574
				ORR1B1-int_dup11905			L1MD_dup4070
				MTEa_dup2837			L1_Mur2_dup17686
				B3_dup145689			Lx3A_dup2057
				IAPEz-int_dup411			Lx7_dup13639
				RMER5_dup7365			B1_Mus2_dup36181
				B1_Mur3_dup14740			L1MdF_IV_dup602
				Lx_dup5921			L1MdTf_II_dup956
				MT2_Mm_dup1315			Lx5c_dup1017
				L1Lx_III_dup13862			B3_dup52839
				Lx5b_dup6229			L1MdTf_III_dup1172
				PB1D7_dup23762			L1MdFanc_I_dup2561
				RLTR10-int_dup1069			MMERVK9C_I_dup377
				MurERV4-int_dup1244			L1MdA_III_dup5239
				MMERVK10C-int_dup2439			ORR1C2_dup3914
				Lx8b_dup350			IAPLTR2_Mm_dup161
				IAPEz-int_dup3340			ID_B1_dup52981
				L1Lx_IV_dup12010			L1MdGf_II_dup6376
				LTRIS_Mm_dup486			B2_Mm1a_dup9773
				RMER17C-int_dup786			L1MDa_dup1986
				ORR1A2_dup4099			RMER19B2_dup2127
				IAPLTR1a_Mm_dup426			MIRc_dup19483
				L1MdA_II_dup4514			B3_dup52837
				MTEa_dup3089			L3_dup9210
				IAPLTR4_I_dup179			L1M5_dup13236
				L3b_dup480			RMER1B_dup5998
				L1Lx_I_dup8335			ORR1F_dup3618
				MERVL-int_dup781			L1MdF_V_dup11212
				ERVB5_2-LTR_MM_dup113			LTRIS2_dup623
				RLTR4_MM-int_dup1594			RMER6A_dup1663
				Lx2_dup7091			L1_Mur3_dup16191
				L1MdA_I_dup1132			B3A_dup82724
				IAPEz-int_dup935			B3A_dup30762
				URR1B_dup935			MERVK26-int_dup859
				L2_dup1337			MLT1A_dup361
				Lx9_dup17923			MTD_dup44194
				L1MdF_III_dup3996			MTE2b_dup15854
				RMER17A_dup782			RLTR30D_MM_dup165
				B1_Mur2_dup28125			L1MdA_IV_dup4460
				ID_B1_dup40811			B2_Mm1a_dup14630
				B3_dup96480			L1Lx_III_dup11283
				L1MdA_VII_dup3317			L1MdA_III_dup7129
				ORR1A1_dup5046			B1F1_dup6434
				B1_Mus1_dup73548			L1MdV_II_dup3213
				B2_Mm2_dup37155			MLT1J_dup338
				L1MdA_I_dup1789			B4_dup49829
				B4A_dup75997			PB1_dup4151
				L1MdTf_I_dup1107			PB1D10_dup59306
				IAPEz-int_dup6947			B3_dup77529
				B1_Mur4_dup14703			ID_B1_dup103686
				RMER5_dup7162			B1_Mus1_dup26857
				RSINE1_dup83792			L1MdA_III_dup4825
				Arthur2_dup93			MRLTR33_dup451
				L1MEg_dup1629			Lx4A_dup8031
				B3_dup9342			IAPEz-int_dup6227
				RLTR24_dup1080			RMER17C_dup3313
				L1MdF_III_dup11271			Lx8_dup598
				L1MdA_I_dup3132			B3_dup23910
				RLTR4_Mm_dup109			B1F_dup36376
				MTA_Mm_dup6149			B3_dup18221
				ID_B1_dup30569			RLTR4_MM-int_dup570
				L1MdGf_II_dup3747			B3_dup141942
				B2_Mm2_dup86278			B1F_dup14940
				L1MdA_II_dup1725			ERVB4_1-I_MM_dup419
				Lx3C_dup2536			ORR1D1_dup4917
				L1MdV_III_dup5965			L1MdA_I_dup1944
				ORR1D2_dup1289			RSINE1_dup27849
				L1MdA_III_dup6893			MTB_dup7945
				B1_Mus2_dup69204			L1MdA_I_dup1442
				IAPEz-int_dup2934			ORR1E_dup19824
				RLTR10A_dup564			B2_Mm1a_dup641
				Lx9_dup17918			L1MdTf_II_dup530
				Lx8_dup35290			Lx8_dup42697
				Lx8_dup8055			Lx2B2_dup1670
				MLT1F2_dup2120			L1MdGf_II_dup5450
				RMER15-int_dup1210			L1MdF_III_dup12534
				B1F_dup41541			L1MdF_IV_dup13294
				IAPEz-int_dup3484			RLTR4_Mm_dup166
				Lx6_dup7427			Lx5_dup15012
				L1MdA_III_dup2219			L1MdGf_II_dup5751
				L1MC4_dup5211			L1M4b_dup1605
				RSINE1_dup35612			L1MdA_V_dup1304
				L1Lx_IV_dup12006			MTD_dup23860
				Lx7_dup29959			B1F_dup40598
				L1MdTf_III_dup4482			L1M3_dup537
				RLTR11A_dup745			B4A_dup81281
				MMETn-int_dup171			L1MC5_dup1422
				L1MdA_I_dup157			L1MdFanc_II_dup10808
				L1MdMus_I_dup4779			Lx6_dup551
				Lx4B_dup1994			L1MdF_III_dup6316
				L1Lx_IV_dup10246			MTD_dup38644
				IAPEz-int_dup1623			B3_dup52838
				L1Lx_IV_dup12009			Lx7_dup31246
				L1MdTf_II_dup910			L1MdA_III_dup1361
				PB1D9_dup28467			B3_dup55797
				RLTR6_Mm_dup225			L1MdF_III_dup10152
				Lx3_Mus_dup9546			MTD_dup38040
				MTA_Mm_dup17720			L1MdA_I_dup1282
				ORR1B1_dup15882			IAPLTR1_Mm_dup80
				L1_Mur3_dup6420			RLTR4_MM-int_dup9061
				Zaphod2_dup151			Lx3B_dup4873
				RSINE1_dup86526			MTE2b_dup291
				ORR1E_dup7231			Lx8_dup50647
				PB1D11_dup3233			L1Lx_IV_dup12009
				MIRb_dup41233			MT2B_dup731
				B3_dup113336			L1ME1_dup2602
				L1MdA_I_dup3215			ORR1F_dup1066
				MTD_dup54162			L1_Mur1_dup5459
				B2_Mm1a_dup7468			Lx5c_dup8212
				MTE2a_dup4100			B1_Mus2_dup66926
				ORR1D1_dup17674			B4_dup52846
				L1MdV_I_dup50			URR1A_dup16653
				B1_Mm_dup31713			Lx8_dup56290
				RSINE1_dup60119			L1ME3G_dup1043
				L1MdGf_II_dup6911			Tigger6_dup81
				B3A_dup85632			L1MdA_II_dup1249
				B1_Mur2_dup15047			B3A_dup35753
				L1_Mur1_dup6918			Lx2_dup5511
				L1MdGf_II_dup1204			Lx8b_dup26573
				L1MdA_II_dup5012			RMER15_dup516
				RLTR44-int_dup646			MER68B_dup71
				B2_Mm1a_dup5356			RLTR17B_Mm_dup23610
				Lx6_dup15448			B3A_dup80639
				MERVL-int_dup1474			L1Lx_IV_dup967
				B2_Mm1a_dup7070			B1_Mur1_dup32615
				L1MdF_I_dup530			ORR1D2_dup16896
				L1MdA_II_dup1058			MMERVK10C-int_dup3057
				MT2_Mm_dup1076			MT-int_dup361
				IAPEz-int_dup3854			MLT1A_dup4930
				L1MB8_dup1114			RCHARR1_dup1431
				B1F_dup13327			ID_B1_dup46992
				L1MC1_dup4816			B1_Mus1_dup32919
				RMER13A2_dup1337			B1F_dup2151
				Lx2A_dup20			B1F1_dup3294
				IAPEz-int_dup7040			B2_Mm1a_dup15738
							B1_Mus1_dup76246
							B3_dup29312
							MMERVK10C-int_dup2125
							RLTR20B3_dup840
							B4A_dup54635
							RLTR9A3B_dup213
							MIRb_dup39777
							L1MEg_dup1629
							MTA_Mm_dup8871
							L2a_dup3280
							MMERVK10D3_I_dup1109
							Lx7_dup12237
							PB1D10_dup27654
							MTA_Mm_dup1076
							BGLII_B_dup747
							L1MdV_III_dup3941
							IAPLTR2_Mm_dup211
							MIR_dup26842
							RMER17C-int_dup981
							Lx3A_dup8055
							MT2B1_dup6090
							L1MdF_I_dup117
							B1_Mus1_dup48046
							MLTR14_dup562
							Lx4A_dup1707
							ETnERV-int_dup631
							URR1B_dup109
							L1MdA_I_dup2653
							RLTR17B_Mm_dup31740
							B1_Mur4_dup10952
							L2_dup1415
							B1F_dup35651
							ORR1A2_dup15425
							RMER19C_dup2994
							Lx5_dup11385
							L1MdTf_III_dup4261
							L1MdV_I_dup982
							ORR1B1_dup6902
							L1Lx_I_dup6520
							Lx2_dup4006
							L1MdMus_I_dup265
							IAPEz-int_dup6006
							L1Lx_III_dup12136
							B4A_dup15669
							L1MdGf_I_dup82
							Lx7_dup3303
							ORR1C2_dup637
							Cheshire_dup21
							L1MdF_III_dup5148
							ID_B1_dup58174
							IAPEz-int_dup3144
							L1MdA_I_dup1306
							RLTR4_MM-int_dup10600
							L1Lx_I_dup6522
							B3_dup117892
							L1MdV_III_dup4224
							MER58B_dup1423
							Charlie30a_dup135
							IAPEz-int_dup1317
							L1MdF_IV_dup17933
							MIRb_dup1934
							L1MdF_I_dup4217
							HAL1_dup1732
							MLTR14_dup3276
							ORR1A4_dup6576
							MTD_dup46245
							RMER10A_dup3047
							B4_dup50187
							L1MdF_III_dup5734
							L1Lx_IV_dup4784
							B3_dup74362
							L1M3e_dup190
							OldhAT1_dup1422
							B1_Mur4_dup19745
							L1MdN_I_dup1690
							ID4_v_dup15206
							Lx8_dup1126
							Lx2_dup6660
							IAPLTR2a_dup658
							L1_Mur2_dup7916
							MER33_dup1771
							MTD_dup507
							ERVB4_1B-I_MM_dup1004
							MMERVK10D3_I_dup841
							RLTR4_Mm_dup73
							IAPEz-int_dup5807
							MTC_dup7075
							IAPEz-int_dup7577
							ORR1D2_dup1328
							IAPLTR1_Mm_dup317
							L1MC4_dup5019
							L1MdFanc_II_dup3693
							L1M2_dup10417
							L1MdMus_I_dup5591
							L1MdA_II_dup1238
							B1F1_dup17327
							L1MA8_dup3449
							RLTR19_dup5
							RLTR1B-int_dup633
							URR1B_dup4177
							RLTR20A4_dup9421
							PB1D10_dup53737
							RMER4B_dup2744
							L1MdTf_I_dup133
							L1MC1_dup3043
							IAPEz-int_dup4051
							L1M7_dup206
							MTD_dup27789
							MTD_dup42024
							RLTR4_MM-int_dup9062
							Lx4A_dup8415
							B3A_dup45320
							B1F_dup39446
							MER5A_dup2602
							L1MdFanc_II_dup6209
							L1Lx_IV_dup7924
							RLTR30B_MM_dup157
							Lx2B_dup5217
							L1MdTf_II_dup852
							B3A_dup33959
							MLTR11B_dup2266
							B1_Mur2_dup27165
							ETnERV2-int_dup574
							L2_dup17304
							B1F_dup13327
							B3_dup144101
							B3A_dup65012
							B1_Mm_dup9521
							ID_B1_dup69036
							L1MdA_IV_dup4085
							MLT1B_dup6114
							MER21B_dup1260
							L1Lx_IV_dup8700
							L1MdTf_II_dup2443
							B2_Mm1t_dup11147
							ORR1C2_dup1494
							RLTR17D_Mm_dup485
							B1_Mur1_dup27046
							L1MdA_III_dup1303
							RLTR20C1_MM_dup3333
							IAPEz-int_dup4095
							L1MdF_IV_dup9156
							RMER12_dup2569
							B4A_dup71684
							Lx7_dup28150
							Lx8_dup23750
							Lx2B_dup2771
							MTB_Mm_dup5442
							Lx_dup11488
							MER2_dup10135
							URR1A_dup15049
							URR1B_dup11030
							L1MdTf_II_dup667
							L1MdFanc_II_dup564
							L1_Rod_dup1183
							IAPEz-int_dup1546
							RLTR1B_dup295
							Lx2B_dup2773
							RSINE1_dup60117
							B3A_dup90067
							L1MdA_II_dup17
							PB1D10_dup41471
							RMER1C_dup109
							Lx4A_dup4454
							Lx4B_dup1853
							RLTR10_dup783
							MamRTE1_dup3918
							MMERVK10C-int_dup3116
							Tigger18a_dup37
							Lx10_dup4175
							B1_Mus1_dup91818
							L1MdGf_II_dup5431
							RMER10A_dup2591
							MamRTE1_dup1961
							ID_B1_dup84513
							IAPEz-int_dup1181
							L2_dup275
							RLTR10-int_dup2405
							RMER19C_dup2076
							MIR_dup7185
							L1MdF_V_dup11213
							L1Lx_I_dup18819
							B1_Mus2_dup12334
							B4A_dup10343
							B2_Mm1a_dup10959
							PB1D9_dup9286
							B3_dup77250
							L1MdF_IV_dup9155
							L1M4_dup10111
							MIRb_dup30497
							L1MdA_IV_dup5739
							MTC_dup26297
							RSINE1_dup99681
							L2a_dup1778
							L1MdA_II_dup1928
							MLTR14_dup6134
							ORR1G_dup6430
							Lx7_dup33918
							RLTR44E_dup78
							B2_Mm1t_dup24711
							L1MdF_I_dup4218
							ORR1F_dup17210
							RLTR17B_Mm_dup19030
							MER2_dup8597
							RLTR4_Mm_dup90
							Lx2B_dup1633
							L1ME3F_dup56
							Lx2B_dup2772
							RLTR10A_dup484
							Lx5_dup12812
							L1MdGf_II_dup6347
							ID_B1_dup87358
							MTE2a_dup190
							MTD_dup50803
							LTR84a_dup74
							L1MdA_II_dup1660
							Lx3B_dup4874
							MT2_Mm_dup311
							PB1_dup11528
							MT2_Mm_dup171
							B3A_dup52717
							Lx8b_dup26570
							MLT1D_dup7330
							Lx5b_dup3704
							IAPEz-int_dup3259
							ORR1B1_dup6169
							RLTR11A2_dup213
							B3_dup44037
							L1MdF_I_dup6664
							L1MdGf_I_dup1672
							RMER13A1_dup30
							L1Lx_IV_dup1077
							L1_Mur2_dup8713
							B4_dup4225
							RMER1B_dup6964
							IAPEY2_LTR_dup1030
							L1MdV_I_dup4542
							B3A_dup86538
							B2_Mm2_dup69222
							BGLII_dup2247
							L1MdFanc_I_dup4425
							B1_Mur3_dup10677
							L1MB7_dup4957
							RMER1C_dup2022
							RSINE1_dup100846
							L1MdGf_II_dup1110
							MIRb_dup8778
							MTC_dup26296
							MTEa_dup853
							L1M4_dup10114
							B3A_dup87278
							Lx5_dup14643
							MTC_dup8111
							Lx7_dup21420
							L1MdV_I_dup4541
							Lx3B_dup2310
							ID4_dup18900
							Lx10_dup8191
							MTE2b_dup15357
							B2_Mm2_dup83837
							Lx8_dup33043
							ID_B1_dup99962
							L1MC4_dup2963
							RMER15_dup3629
							B1F_dup35684
							ID4_dup4552
							L1_Mur3_dup1559
							B4_dup50066
							ORR1D1_dup22622
							L3b_dup809
							MLT1A0_dup6305
							L1MdGf_I_dup862
							B1_Mus1_dup87687
							RMER20B_dup1237
							L1Lx_IV_dup9352
							RMER20B_dup1079
							B3_dup23755
							ORR1A3_dup4701
							MTD_dup44292
							ORR1C2_dup1005
							B1_Mur1_dup36235
							L1ME4c_dup214
							Lx3_Mus_dup9137
							MURVY-LTR_dup2095
							ORR1B1-int_dup20235
							L1MdV_I_dup8475
							hAT-1_Mam_dup306
							MTEa_dup15058
							PB1D7_dup19078
							B2_Mm2_dup52430
							RLTR17_dup1032
							RLTR20A_dup6
							MTD_dup37310
							RLTR4_MM-int_dup11763
							Lx6_dup1293
							MT2_Mm_dup344
							L1MdV_III_dup4429
							Lx7_dup21692
							B1_Mm_dup25169
							L1MdV_III_dup4424
							RSINE1_dup41076
							IAPEz-int_dup810
							B1_Mur2_dup27164
							Lx9_dup605
							L1MEg_dup1628
							MER21C_dup2246
							ORR1A4_dup4103
							ORR1D2_dup14303
							MLT1B_dup6215
							L1MdA_II_dup2223
							B1_Mus1_dup47613
							MMERVK10C-int_dup1005
							RLTR4_Mm_dup236
							Cheshire_dup612
							ERVB4_1-I_MM_dup421
							IAP1-MM_I_dup13
							RLTR4_MM-int_dup2409
							ID_B1_dup19057
							MIRb_dup5265
							L1MdTf_III_dup1041
							L1MdGf_II_dup4109
							MTEb_dup11735
							L1MB2_dup2560
							RLTR4_MM-int_dup5422
							MLT1D_dup6613
							MIRb_dup8775
							Lx3B_dup4877
							L1MdFanc_II_dup7501
							L2a_dup21774
							URR1B_dup4452
							RLTR20A1_dup99
							Lx10_dup9331
							MTEa_dup15057
							B1_Mus1_dup71009
							IAPEz-int_dup234
							ORR1A2_dup16530
							MTB_Mm_dup5192
							Lx8_dup24580
							MLT1A1_dup1452
							RLTR6_Mm_dup94
							IAPEz-int_dup1042
							ORR1B1_dup5741
							MLT1O_dup418
							Lx8b_dup26571
							IAPEz-int_dup2369
							ID_B1_dup39196
							B2_Mm1a_dup6896
							L1MdFanc_I_dup9316
							ORR1D1_dup22882
							IMPB_01_dup22411
							Lx9_dup16632
							X6B_LINE_dup473
							ID4_dup18606
							RMER4B_dup4120
							RMER6C_dup1965
							L1MdMus_I_dup5170
							RMER17B2_dup1141
							Plat_L3_dup440
							URR1B_dup725
							Tigger5b_Glire_dup155
							B1_Mur2_dup18138
							RLTR27_dup1262
							RLTR17B_Mm_dup40317
							L1MdGf_I_dup638
							B1F_dup34309
							RLTR4_MM-int_dup11166
							Lx3_Mus_dup239
							B3_dup9968
							RMER15-int_dup101
							ORR1A1_dup323
							UCON28a_dup64
							L1MdTf_I_dup898
							PB1D10_dup39443
							Tigger5b_Glire_dup2181
							Lx2B2_dup102
							L1MdF_I_dup8298
							L1MdV_III_dup2281
							MTE-int_dup2163
							B1_Mur4_dup6175
							IAPEz-int_dup5734
							MER58B_dup1588
							B2_Mm2_dup16103
							L1MD_dup4128
							MTB_Mm_dup5443
							L1MdF_III_dup9046
							L1MdF_I_dup3697
							RMER1B_dup6733
							B2_Mm1a_dup3789
							MTE-int_dup2162
							L2a_dup6133
							ORR1C2_dup3979
							Lx9_dup607
							ID4_v_dup24121
							L1MdF_IV_dup337
							RLTR17B_Mm_dup23609
							ERVB5_1-I_MM_dup161
							L1MdTf_I_dup860
							MER74B_dup285
							Lx3C_dup109
							RSINE1_dup75468
							MTA_Mm_dup4517
							Lx8_dup55169
							L1MdA_III_dup2617
							B1_Mus2_dup54554
							L1MdF_IV_dup10874
							Lx4A_dup4806
							B3_dup102045
							L1MdA_IV_dup2464
							ID_B1_dup104158
							ORR1F_dup8335
							RSINE1_dup88824
							B1F1_dup6381
							L1MdN_I_dup1991
							MTA_Mm_dup16524
							ORR1E_dup18739
							IAPEz-int_dup3077
							ORR1D2_dup10464
							L1Lx_I_dup8409
							IAPEz-int_dup4747
							B4_dup25250
							B1_Mur2_dup6232
							L1MdGf_II_dup3450
							B2_Mm1t_dup13647
							RSINE1_dup43298
							L1M2_dup2456
							IMPB_01_dup15482
							RLTR10-int_dup1003
							B1F1_dup1143
							Lx8_dup10240
							URR1A_dup15844
							MIRb_dup17205
							MIR_dup31338
							L1Lx_IV_dup8701
							L1MdF_I_dup3814
							B4_dup25754
							MER5A_dup8003
							MTEa_dup7872
							L2_dup17415
							RMER13B_dup188
							ETnERV-int_dup414
							B2_Mm2_dup34703
							RLTR11A_dup1933
							B2_Mm2_dup15042
							LTRIS_Mm_dup77
							Lx8_dup9200
							ORR1B1_dup6404
							MTE2a_dup14539
							B3_dup13459
							Lx8_dup3413
							MTB_dup5700
							B3_dup84756
							L1_Mur2_dup8714
							B1_Mus1_dup35544
							L1MC4_dup1483
							URR1A_dup3525
							RLTR4_MM-int_dup1897
							ID_B1_dup84556
							L1MdGf_I_dup1448
							RMER6A_dup3991
							Lx2_dup17498
							MTEa_dup14732
							L1MdMus_I_dup4567
							B1F1_dup9665
							L1M4_dup8089
							RLTR30D2_MM_dup32
							B1_Mur4_dup27958
							B1_Mur2_dup13096
							ORR1D2_dup16900
							MER34A1_dup304
							L1MdA_I_dup3962
							Lx10_dup11128
							L1MdA_II_dup406
							MTA_Mm_dup14055
							MLT1C2_dup6462
							RLTR10-int_dup679
							B1F1_dup4102
							B2_Mm2_dup45051
							MTC_dup26891
							L1MA6_dup395
							MIR_dup24763
							L1Lx_I_dup4757
							L1MdA_II_dup524
							RSINE1_dup46478
							L1ME3A_dup1541
							B2_Mm2_dup68698
							MERVK26-int_dup33
							L2_dup17192
							B4_dup44125
							ORR1A3-int_dup8948
							MTC_dup13571
							Lx3_Mus_dup151
							L1MdF_I_dup6739
							MLT1N2_dup218
							MIRb_dup13606
							ORR1B1_dup1305
							Lx5_dup8501
							L1Lx_IV_dup10451
							MTD_dup9641
							ORR1B2_dup3329
							Charlie1a_dup1307
							L1MdTf_I_dup455
							L1MdTf_III_dup272
							B2_Mm2_dup30650
							B4A_dup24856
							MER113_dup230
							L1MdTf_III_dup4452
							RLTR4_MM-int_dup800
							MamRTE1_dup82
							MMERVK9E_I_dup798
							B4_dup58059
							B3_dup146487
							IAPEz-int_dup3299
							L1MdF_I_dup3433
							PB1_dup4152
							L1MdF_V_dup403
							ID_B1_dup104151
							MTA_Mm_dup17653
							PB1D9_dup15679
							L1MdA_III_dup8519
							B4_dup42664
							ID_B1_dup32394
							ORR1D1_dup1225
							L1_Mur3_dup15932
							L1MdGf_II_dup2765
							ORR1F_dup13968
							L1MdTf_III_dup2331
							B3A_dup33052
							L1ME2_dup650
							RLTR4_Mm
							B1_Mus1_dup85427
							IAPLTR1_Mm_dup351
							Lx7_dup23931
							Lx_dup7782
							B3A_dup1850
							RLTR20A4_dup5517
							ORR1B1-int_dup59526
							URR1A_dup9754
							RMER19B2_dup2129
							IAPEz-int_dup1122
							B1_Mur1_dup29187
							RMER6B_dup939
							ID4_dup21179
							X9_LINE_dup440
							MTD_dup506
							L1MdV_III_dup1118
							B4A_dup29303
							L1MC4_dup4118
							B3_dup48899
							L1MdTf_III_dup2673
							L1MB2_dup2549
							B2_Mm1a_dup8672
							Lx6_dup12332
							MER76_dup118
							PB1D7_dup7895
							IAPEY4_I_dup436
							MIRc_dup4228
							Zaphod_dup364
							L1MdGf_II_dup4187
							RMER4A_dup191
							L2a_dup21775
							MTA_Mm_dup6310
							PB1_dup9316
							L1MdF_IV_dup3338
							ID_dup959
							MIR_dup23226
							MamRTE1_dup3188
							RLTR41_dup35
							L1MB2_dup1237
							Lx8_dup1130
							RLTR1C_dup16
							L1MdA_III_dup4662
							L1MA6_dup4248
							L1MdA_II_dup1960
							ID4_dup3794
							RMER16_Mm_dup383
							RMER19B_dup2733
							B1_Mur1_dup12924
							B3A_dup65013
							RSINE1_dup75989
							L1MdTf_II_dup2437
							L1MdTf_III_dup3272
							MYSERV-int_dup1108
							L1MdGf_II_dup3431
							L1MdF_III_dup10461
							L1MdA_I_dup4240
							B1_Mus1_dup78709
							RMER1B_dup4892
							MTE2b_dup12790
							MERVL_2A-int_dup1045
							Charlie5_dup1402
							MMVL30-int_dup508
							L1MdF_IV_dup13293
							MTA_Mm_dup7058
							L2a_dup1777
							PB1D9_dup11589
							MER2_dup8508
							L1Lx_III_dup1714
							B2_Mm1a_dup16715
							B2_Mm1a_dup15180
							L1MdA_II_dup1929
							MER2_dup8428
							MTD_dup8
							L2c_dup1773
							B4A_dup80726
							IAPEz-int_dup2905
							B3_dup127145
							IAPEz-int_dup2516
							L1MdFanc_II_dup5222
							IMPB_01_dup23368
							B3_dup95599
							RMER15_dup6982
							B4_dup17545
							RMER19C_dup254
							B1_Mm_dup33786
							L1MdV_I_dup981
							B2_Mm2_dup45582
							PB1D10_dup55184
							MTB_dup1779
							L1MdTf_I_dup1496
							ERVL-B4-int_dup21
							L1MdA_I_dup1099
							IAPEz-int_dup1850
							RLTR4_Mm_dup185
							ORR1A1-int_dup228
							L1M5_dup4773
							L1MdFanc_I_dup8032
							ETnERV2-int_dup1533
							B1_Mus1_dup34697
							L1M3_dup6236
							IAPEz-int_dup3156
							MER31A_dup234
							RLTR45-int_dup391
							MTA_Mm_dup8292
							IAPEz-int_dup3568
							ORR1C2_dup66
							L1_Mur3_dup8762
							RMER15_dup1123
							RSINE1_dup60120
							L1MdA_II_dup1785
							MTD_dup54116
							B1_Mm_dup2439
							RLTR17B_Mm_dup48790
							L1MC4_dup5211
							L1MdF_IV_dup17934
							Tigger20a_dup137
							L1MdTf_I_dup664
							L1MdF_III_dup4375
							IAPEz-int_dup1360
							MTEb_dup3613
							RLTR14_dup60
							ORR1B1-int_dup7985
							RCHARR1_dup6688
							MER31A_dup86
							B2_Mm2_dup40510
							MTE2b_dup11405
							ETnERV3-int_dup597
							RLTR17B_Mm_dup369
							RLTR20A4_dup13573
							Lx5b_dup2858
							RLTR13B3_dup32
							ORR1A0_dup1385
							Lx_dup6884
							L1MdTf_I_dup1569
							LTRIS6_dup16
							Lx3_Mus_dup11463
							PB1D10_dup31652
							B3A_dup87769
							RMER20A_dup115
							MTB_dup7222
							B4A_dup45098
							L1_Mur2_dup5061
							Lx7_dup33674
							L1ME3A_dup1300
							B4A_dup35390
							MIRb_dup21956
							B3_dup78618
							Lx8_dup17736
							L1M2_dup10074
							MLT1B_dup4180
							L1MdV_III_dup3297
							RSINE1_dup93745
							L2b_dup8916
							MTD_dup4756
							Charlie1_dup190
							L1_Mur2_dup19097
							RLTR4_MM-int_dup2630
							L1MdA_II_dup4343
							IAPEz-int_dup1567
							L1MdFanc_I_dup243
							MIRb_dup22883
							MER124_dup209
							L1MdF_IV_dup17939
							MTE2a_dup189
							MLT1A0_dup4629
							ERVB4_1C-LTR_Mm_dup288
							L1MdFanc_I_dup8030
							B3_dup123397
							LTR40b_dup593
							MER2_dup9618
							MLT1A_dup585
							ORR1D1_dup22987
							L3_dup4833
							ORR1B1-int_dup14407
							L1MC4_dup5210
							MIR_dup20160
							RMER13B_dup1320
							L1MdA_II_dup5055
							RLTR13D5_dup534
							MER5A_dup2862
							RLTR35B_MM_dup473
							B4_dup50887
							L1Lx_I_dup8299
							B4_dup59026
							RLTR10B_dup38
							L1MdA_VII_dup8353
							RLTR33_dup101
							L1MdFanc_I_dup4423
							B1F_dup16412
							RLTR4_MM-int_dup1848
							L1MdF_III_dup4812
							Lx9_dup33897
							MTA_Mm_dup3938
							L1MdA_I_dup1188
							L1MdA_VI_dup1071
							L1MD_dup231
							B1_Mur4_dup9669
							L2b_dup13970
							B1_Mm_dup27950
							RLTR13G_dup311
							B2_Mm2_dup76026
							L1MdGf_II_dup844
							L1MdA_II_dup5061
							ID4_v_dup3566
							PB1D10_dup24395
							Lx2_dup500
							Lx5_dup7365
							B3A_dup41466
							MMETn-int_dup60
							B1_Mur1_dup26698
							Charlie1b_dup922
							RLTR13G_dup786
							L2_dup1414
							Lx8_dup21299
							B1_Mus1_dup82668
							ORR1G_dup6695
							ORR1B1_dup13799
							B2_Mm2_dup33686
							RLTR40_dup686
							Lx5c_dup384
							B3A_dup80748
							RLTR11A2_dup2075
							ID_B1_dup53121
							Lx3_Mus_dup9103
							B1_Mus2_dup15197
							L1MdV_II_dup6426
							L1MdA_VII_dup3287
							RMER5_dup7163
							Tigger17a_dup246
							B3_dup5279
							RSINE1_dup43392
							MIR_dup20181
							RLTR25B_dup3168
							L2c_dup6004
							L1MdF_V_dup4665
							L1MA6_dup6666
							Lx6_dup7368
							L1MdTf_III_dup4278
							L1M5_dup4574
							L1MdA_IV_dup308
							RSINE1_dup9560
							Lx5_dup9383
							Charlie8_dup129
							MER45R_dup379
							L1M3_dup5907
							ID_B1_dup5948
							ID_B1_dup1016
							ORR1F_dup21117
							MMERVK10C-int_dup2066

## Sheet: Table S4
Middle v Middle-IF	Old v Old-IF
1700047M11Rik	0610009L18Rik
4930506C21Rik	1110019D14Rik
9230112E08Rik	1600020E01Rik
9330117O12Rik	1700109H08Rik
9330199G10Rik	1700110I01Rik
9630009A06Rik	1700124L16Rik
9630028B13Rik	1810014B01Rik
A330072L02Rik	2410004P03Rik
A3galt2	2610203C22Rik
A730020M07Rik	2610306O10Rik
A930006I01Rik	2700052C19Rik
Abca1	2810025M15Rik
Abca8a	2810403D21Rik
Acer2	2810414N06Rik
Adamtsl1	2810433D01Rik
Adamtsl4	2810459M11Rik
Adcy4	2900002M20Rik
Adcy8	2900022M07Rik
Adgrd1	3000002C10Rik
Adipor2	4732440D04Rik
Agbl2	4732471J01Rik
Ankrd10	4930405O22Rik
Asgr1	4930452G13Rik
Atp10b	4930506C21Rik
BC016579	4930590J08Rik
Bche	4933427D14Rik
Bcl2l1	4933439C10Rik
Brca2	5031425E22Rik
Brd3	5031439G07Rik
Brpf3	5330406M23Rik
Ccnl2	5330434G04Rik
Ccr9	5730408A14Rik
Cd44	6330419E04Rik
Cd55	8030445P17Rik
Cdh1	8430422M14Rik
Chdh	9130023H24Rik
Clic5	9230112E08Rik
Cmtm5	9230112J17Rik
Cpne7	9330104G04Rik
Cyp27a1	9330117O12Rik
Cyp2c55	9330159F19Rik
Dao	9330162G02Rik
Dapk1	9330188P03Rik
Dapk2	9330199G10Rik
Dapl1	9430015G10Rik
Defb42	9430041J12Rik
Dio2	9430064I24Rik
Dmrta1	9530059O14Rik
Dnah3	A130050O07Rik
Dpp4	A230001M10Rik
Dzip1l	A230087F16Rik
Ecm2	A230103L15Rik
Enpp3	A330015K06Rik
Etv5	A330023F24Rik
Fa2h	A330076H08Rik
Fads2b	A630081D01Rik
Fam83b	A730020M07Rik
Fat2	A730060N03Rik
Fbxw23	A930006I01Rik
Fcrl2	A930009A15Rik
Gabrr2	A930040O22Rik
Gbp2	Aak1
Gjb1	Abca8a
Gkn3	Abcb7
Gm10654	Abcc10
Gm10925	Abcc12
Gm11944	Abcc3
Gm12689	Abcc5
Gm13546	Abce1
Gm19439	Abl1
Gm20162	Acap3
Gm30122	Acat3
Gm34256	Ache
Gm36356	Acin1
Gm37345	Ackr1
Gm37885	Ackr3
Gm38642	Acot2
Gm42495	Acot6
Gm43089	Acp6
Gm43333	Acsl4
Gm43597	Acta2
Gm43598	Actg1
Gm43667	Adamts1
Gm43860	Adamts12
Gm44645	Adamts17
Gm47059	Adamts2
Gm48508	Adamts5
Gm597	Adamtsl1
Gm7240	Adamtsl3
Gm8173	Adamtsl4
Gpd1	Adcy4
Gpr26	Adcy6
Gpx8	Add3
Gstm7	Adgb
Gsto2	Adgra2
H1f0	Adgrb1
Hacd4	Adgrb2
Hmcn1	Adgrd1
Hoxc8	Adgre1
Hydin	Adgre5
Ifit3	Adgrg6
Ifit3b	Adgrl1
Igfbp5	Adh1
Ighm	Adipor2
Igkc	Ado
Il33	Adra1a
Ildr1	Adra2a
Impg2	Aebp1
Invs	Agap2
Itga2	Agap3
Itga4	Agbl3
Jag1	Agk
Kcnip2	Ago4
Krt19	Agpat4
Ldlrad4	Agps
Lmntd1	Agt
Lpo	Agtr1a
Ly6g6e	Agtrap
Lypd2	Ahctf1
Lyz2	Ahdc1
Mall	Ahsa2
Map3k19	AI197445
Marf1	AI429214
Mfhas1	AI504432
Mfsd2b	AI987944
Mill2	Aif1
Mmp14	Aire
Mns1	Akap17b
Mob3b	Akap8
Mog	Akip1
Myl1	Akr1b8
Myo1d	Akr1c14
Naaladl2	Alas2
Nat8f3	Aldh1a1
Ncbp3	Aldh1b1
Neat1	Aldh1l2
Nlrp1b	Aldh3b1
Nlrp5-ps	Alkbh5
Nos3	Alpl
Nr1d1	Amer2
Nt5e	Amot
Olfml1	Amotl1
Opalin	Amotl2
Ovgp1	Amy1
Padi2	Amz1
Pcdhgc4	Angptl2
Pdk1	Ankrd10
Pdk4	Ankrd11
Piezo2	Ankrd13a
Pik3r3	Ankrd13b
Pipox	Ankrd49
Pkn3	Ankrd52
Pla2g4a	Ankrd54
Pmp22	Anks1
Podxl	Anks3
Ppp1r3c	Anks6
Prelp	Anpep
Prss35	Antxr2
Ptpn13	Anxa2
Rab7b	Anxa3
Rbm3	Anxa4
Rgs8	Anxa5
Ripor2	Aoah
Rsad2	Aoc2
S1pr5	Ap1g2
Sat1	Ap3s2
Scara3	Apba3
Serpinb1a	Apbb1ip
Serpind1	Apcdd1
Sgk2	Apln
Slc15a4	Apobec1
Slc16a9	Apoe
Slc25a48	Aqp4
Slc26a7	Arap2
Slc2a5	Arhgap25
Slc38a2	Arhgap39
Slc47a1	Arhgef11
Slc5a3	Arhgef16
Slc6a13	Arid2
Slc6a6	Arid5b
Slc8b1	Arl11
Slc9a9	Arl4d
Slc9b2	Arl5c
Sp7	Arpc1b
Spata31f1a	Arpp21
Spink10	Arsb
Spry2	Arsg
Stmn4	As3mt
Stum	Asap2
Suv39h1	Asb4
Tdgf1	Asgr1
Tmem125	Aspg
Tmem200b	Atad2
Tmem254	Atad2b
Tnfaip6	Atg13
Tpk1	Atg16l2
Trib2	Atg4d
Trim9	Atp10a
Trp63	Atp10b
Trpv4	Atp11a
Tspan8	Atp1a3
Tub	Atp6v0d2
Txnip	Atp8b2
Upp2	Atp8b5
Vegfa	AU020206
Vmn1r206	AU021092
Wnt16	AU041133
Xrcc3	AW112010
Yy1	Axin1
Zbtb40	Axin2
Zeb2os	Axl
Zfp740	B130021K23Rik
	B230112I24Rik
	B2m
	B3galt6
	B3gnt7
	B3gnt9
	B830012L14Rik
	B830042I05Rik
	B930086L07Rik
	Bace2
	Bahd1
	Baiap2l1
	Banp
	Baz1b
	Baz2a
	Bbs10
	BC004004
	BC025920
	BC034090
	Bcat2
	Bche
	Bcl2l1
	Bcl3
	Bcl6
	Bcl9l
	Bco2
	Bcorl1
	Bcs1l
	Bdkrb2
	Bend3
	Bicdl1
	Birc3
	Blm
	Bltp3a
	Bmal2
	Bmp2k
	Boc
	Bptf
	Brca2
	Brd1
	Brd3
	Brd4
	Brpf3
	Bsg
	Bst2
	Btaf1
	Btbd17
	Btbd7
	C030015A19Rik
	C130013H08Rik
	C130073E24Rik
	C1galt1c1
	C1qa
	C1qb
	C1qc
	C1qtnf12
	C1qtnf3
	C1s1
	C230012O17Rik
	C230086J09Rik
	C2cd5
	C3
	C330018D20Rik
	C3ar1
	C4b
	C530005A16Rik
	C78859
	C920006O11Rik
	C920009B18Rik
	Cables1
	Cabp1
	Cacna1h
	Calcoco1
	Cald1
	Calu
	Camta2
	Cand2
	Cap2
	Capg
	Capn10
	Capn15
	Car13
	Car2
	Car3
	Cars
	Casc3
	Caskin2
	Casp12
	Casp4
	Casp7
	Casq2
	Castor2
	Cav1
	Cav2
	Cavin3
	Cblb
	Cbr4
	Cbx2
	Cbx4
	Cbx7
	Ccar1
	Ccdc117
	Ccdc13
	Ccdc134
	Ccdc136
	Ccdc141
	Ccdc168
	Ccdc169
	Ccdc181
	Ccdc190
	Ccdc6
	Ccdc71l
	Ccdc90b
	Ccdc93
	Ccl2
	Ccn1
	Ccn4
	Ccn5
	Ccnd1
	Ccnd2
	Ccnjl
	Ccnl2
	Ccnq
	Ccnt2
	Cd109
	Cd14
	Cd151
	Cd180
	Cd200r4
	Cd22
	Cd274
	Cd300c2
	Cd300lb
	Cd300lf
	Cd33
	Cd34
	Cd37
	Cd44
	Cd52
	Cd53
	Cd63
	Cd68
	Cd72
	Cd74
	Cd82
	Cd84
	Cd86
	Cd9
	Cdan1
	Cdc25b
	Cdc42
	Cdc7
	Cdk6
	Cdkn1a
	Cdkn2a
	Cdkn2b
	Cdkn2c
	Cdsn
	Cebpd
	Cecr2
	Cela1
	Cenpe
	Cenpq
	Cep15
	Cep152
	Cep350
	Cep63
	Cep72
	Cept1
	Cerk
	Cers2
	Cfap92
	Cfp
	Ch25h
	Chd2
	Chd5
	Chd9
	Chdh
	Chek2
	Chfr
	Chka
	Chl1
	Chm
	Chrac1
	Chst3
	Chst8
	Chuk
	Cited4
	Ciz1
	Clasrp
	Cldn14
	Cldnd1
	Clec12a
	Clec1a
	Clec2d
	Clec7a
	Clic1
	Clic4
	Clic5
	Clip1
	Clk1
	Clk3
	Clmn
	Clu
	Cmah
	Cmtm5
	Cmtm6
	Cnn2
	Cnn3
	Cnnm1
	Cnot3
	Cnppd1
	Cnpy2
	Cog5
	Col15a1
	Col2a1
	Col3a1
	Col6a6
	Commd10
	Comt
	Copz2
	Cpd
	Cpeb1
	Cpeb3
	Cplane1
	Cpne3
	Cpne6
	Cpxm2
	Cramp1
	Creb3l1
	Creb5
	Crebbp
	Creld2
	Crip3
	Crispld2
	Crlf3
	Crtc2
	Cry1
	Cry2
	Crybg3
	Csf1r
	Csf2rb
	Csf2rb2
	Csf3r
	Cspp1
	Cst7
	Cstb
	Ctbs
	Ctdsp2
	Ctnna1
	Ctsa
	Ctsb
	Ctsc
	Ctsd
	Ctsh
	Ctss
	Ctsz
	Cttnbp2
	Cx3cr1
	Cxcl10
	Cxcl13
	Cxcl16
	Cxcr4
	Cyb5b
	Cyba
	Cybb
	Cyp27a1
	Cyp2c52-ps
	Cyp2c55
	Cyp4f18
	Cyp51
	Cys1
	Cyth4
	Cytl1
	D3Ertd751e
	D430020J02Rik
	D430040D24Rik
	D630023F18Rik
	D630030B08Rik
	D630045J12Rik
	D7Ertd443e
	D930020B18Rik
	Daam2
	Dab2
	Dap
	Dars
	Dbi
	Dcaf10
	Dclre1a
	Dcn
	Dctpp1
	Ddah2
	Ddc
	Ddr1
	Ddx60
	Deaf1
	Decr1
	Dedd2
	Defb42
	Dennd2b
	Dennd2d
	Dennd6a
	Dennd6b
	Derl1
	Derl3
	Desi2
	Dgcr8
	Dgkb
	Dglucy
	Dhcr7
	Dhh
	Dhrs1
	Dhrs11
	Dhrs3
	Dhx58
	Dio2
	Dkk2
	Dlg5
	Dlgap2
	Dlgap4
	Dll1
	Dmpk
	Dnah8
	Dnajb1
	Dnajb3
	Dnajb4
	Dnajc19
	Dnase1l1
	Dnase1l2
	Dnm2
	Dnmt3a
	Doc2g
	Dock2
	Dok3
	Dpf2
	Dpy19l1
	Dpy19l4
	Dpysl4
	Dtl
	Dtx2
	Dusp15
	Dusp16
	Dusp19
	Duxbl1
	Dvl3
	Dynlt1a
	Dyrk1b
	Dzip1l
	E130114P18Rik
	E130308A19Rik
	E130311K13Rik
	E230029C05Rik
	E2f4
	E330020D12Rik
	E4f1
	E530001F21Rik
	Ebp
	Echdc3
	Ecm2
	Ect2
	Edem1
	Ednra
	Ednrb
	Edrf1
	Eef1a1
	Eef1akmt1
	Eeig2
	Efhb
	Egr2
	Ehmt1
	Ehmt2
	Eif4e2
	Elk1
	Ell2
	Elovl5
	Elovl7
	Emcn
	Emilin1
	Eml1
	Eml2
	Emp1
	Emp2
	Emp3
	Emsy
	Eno3
	Enox2
	Enpp1
	Enpp2
	Enpp3
	Enpp4
	Enpp6
	Entpd1
	Entpd7
	Entrep3
	Ep300
	Epb41
	Epha1
	Ephb1
	Ephb4
	Eps15l1
	Epx
	Eqtn
	Erap1
	Erbb3
	Erbin
	Ercc6l2
	Erich5
	Erlin1
	Esm1
	Etnppl
	Exo1
	Exo5
	Exoc2
	Exoc4
	Exoc6
	Exosc5
	Extl1
	Eya4
	F3
	Fabp5
	Fabp7
	Fadd
	Fam107a
	Fam107b
	Fam114a1
	Fam133b
	Fam135a
	Fam136a
	Fam13c
	Fam167a
	Fam174a
	Fam184b
	Fam53c
	Fam83b
	Fam83d
	Farp1
	Fastkd2
	Fblim1
	Fbn1
	Fbxl18
	Fbxl19
	Fbxl20
	Fbxl21
	Fbxo31
	Fbxo41
	Fbxo47
	Fbxw23
	Fcer1g
	Fcgr2b
	Fcgr4
	Fcho2
	Fcrl2
	Fcsk
	Fdft1
	Fdxacb1
	Fez1
	Fgd1
	Fgd3
	Fgd5
	Fgd6
	Fgfbp3
	Fgfr2
	Fgfr3
	Fgfr4
	Fgfrl1
	Fgl2
	Fgr
	Fhip1b
	Fignl1
	Firre
	Fkbp5
	Flcn
	Flnc
	Flrt1
	Flt3
	Flvcr2
	Fmo2
	Fn3k
	Foxj2
	Foxk1
	Foxs1
	Fsbp
	Fscn1
	Ftl1
	Ftx
	Fut11
	Fut4
	Fxyd1
	Fyb
	Fzd10
	Fzd6
	Fzd7
	G3bp2
	Gabrr2
	Gadd45a
	Gadl1
	Gal3st1
	Galnt6
	Garin2
	Gas2l3
	Gas7
	Gask1b
	Gatb
	Gatm
	Gbp11
	Gbp2
	Gbp3
	Gbp6
	Gbp7
	Gbp9
	Gch1
	Gcnt1
	Gdpd3
	Gfap
	Gga2
	Ggh
	Ggt7
	Ggta1
	Gigyf1
	Gja5
	Gjb1
	Gjb6
	Gjc2
	Gk5
	Glb1
	Glce
	Gli1
	Gli2
	Glipr1
	Glipr2
	Glis2
	Glod4
	Gm10069
	Gm10305
	Gm10635
	Gm10654
	Gm10790
	Gm10863
	Gm1141
	Gm11525
	Gm11611
	Gm11944
	Gm12089
	Gm12250
	Gm12689
	Gm12932
	Gm12940
	Gm12941
	Gm13199
	Gm13293
	Gm13689
	Gm14021
	Gm14379
	Gm14413
	Gm14443
	Gm14532
	Gm14824
	Gm15344
	Gm15513
	Gm15675
	Gm15690
	Gm15708
	Gm15834
	Gm15902
	Gm15918
	Gm16233
	Gm16310
	Gm16675
	Gm17102
	Gm17276
	Gm17382
	Gm17875
	Gm19236
	Gm19325
	Gm19409
	Gm19439
	Gm20276
	Gm20444
	Gm20491
	Gm20559
	Gm20939
	Gm2136
	Gm21781
	Gm21811
	Gm21992
	Gm22442
	Gm22784
	Gm24564
	Gm26365
	Gm26519
	Gm26703
	Gm26871
	Gm27032
	Gm28064
	Gm28119
	Gm2822
	Gm28322
	Gm28693
	Gm28792
	Gm28876
	Gm29214
	Gm29326
	Gm29508
	Gm30122
	Gm31332
	Gm31333
	Gm31508
	Gm32618
	Gm32842
	Gm33594
	Gm33727
	Gm34256
	Gm36266
	Gm36298
	Gm36356
	Gm36855
	Gm36936
	Gm36939
	Gm36952
	Gm36955
	Gm36989
	Gm37011
	Gm37051
	Gm37061
	Gm37077
	Gm37124
	Gm37139
	Gm37186
	Gm37195
	Gm37204
	Gm37206
	Gm37249
	Gm37320
	Gm37326
	Gm37334
	Gm37345
	Gm37382
	Gm37437
	Gm37509
	Gm37519
	Gm37534
	Gm37548
	Gm37551
	Gm37559
	Gm37589
	Gm37602
	Gm37621
	Gm37628
	Gm37629
	Gm37661
	Gm37720
	Gm37728
	Gm37731
	Gm37792
	Gm37795
	Gm37877
	Gm37884
	Gm37885
	Gm37893
	Gm37895
	Gm37899
	Gm37941
	Gm37953
	Gm37962
	Gm37963
	Gm37964
	Gm37965
	Gm38020
	Gm38187
	Gm38190
	Gm38198
	Gm38235
	Gm38245
	Gm38260
	Gm38297
	Gm38393
	Gm38642
	Gm39326
	Gm4117
	Gm4221
	Gm42455
	Gm42478
	Gm42479
	Gm42482
	Gm42486
	Gm42490
	Gm42495
	Gm42500
	Gm42510
	Gm42537
	Gm42547
	Gm42548
	Gm42551
	Gm42583
	Gm42615
	Gm42617
	Gm42639
	Gm42656
	Gm42692
	Gm42727
	Gm42735
	Gm42756
	Gm42840
	Gm42843
	Gm42851
	Gm42878
	Gm42890
	Gm42896
	Gm42908
	Gm42928
	Gm42943
	Gm42946
	Gm43089
	Gm43162
	Gm43197
	Gm43279
	Gm43305
	Gm43359
	Gm43387
	Gm43589
	Gm43594
	Gm43597
	Gm43665
	Gm43667
	Gm43750
	Gm43751
	Gm43765
	Gm43843
	Gm43844
	Gm43858
	Gm43860
	Gm43864
	Gm43872
	Gm43879
	Gm43880
	Gm43882
	Gm43884
	Gm43885
	Gm43889
	Gm44043
	Gm44090
	Gm44091
	Gm44093
	Gm44164
	Gm44178
	Gm44249
	Gm44250
	Gm44257
	Gm44288
	Gm44421
	Gm44437
	Gm44552
	Gm44559
	Gm44562
	Gm44678
	Gm44742
	Gm44750
	Gm44763
	Gm44775
	Gm44831
	Gm44861
	Gm44895
	Gm45206
	Gm45264
	Gm45424
	Gm45461
	Gm45501
	Gm45516
	Gm45591
	Gm45605
	Gm45652
	Gm45772
	Gm45854
	Gm45869
	Gm46447
	Gm47059
	Gm47324
	Gm47494
	Gm47573
	Gm47657
	Gm47676
	Gm47694
	Gm47701
	Gm47863
	Gm47976
	Gm47987
	Gm48062
	Gm48138
	Gm48181
	Gm48207
	Gm48225
	Gm48230
	Gm48328
	Gm48511
	Gm48543
	Gm48565
	Gm48602
	Gm48646
	Gm48726
	Gm48796
	Gm4890
	Gm49130
	Gm49182
	Gm49322
	Gm49405
	Gm49435
	Gm49463
	Gm49555
	Gm49654
	Gm49759
	Gm49891
	Gm50048
	Gm50070
	Gm50230
	Gm5089
	Gm52974
	Gm53007
	Gm5353
	Gm536
	Gm5431
	Gm5466
	Gm54856
	Gm55073
	Gm55328
	Gm5535
	Gm55636
	Gm5697
	Gm597
	Gm6030
	Gm6142
	Gm7061
	Gm7072
	Gm7240
	Gm7967
	Gm816
	Gm8173
	Gm9392
	Gm9625
	Gm9801
	Gm9946
	Gm9989
	Gnb4
	Gng11
	Gnpnat1
	Gnrh1
	Gpatch2l
	Gpatch8
	Gpd1
	Gpnmb
	Gpr152
	Gpr183
	Gpr31c
	Gpr37
	Gpr4
	Gpr62
	Gpr65
	Gpr84
	Gpx1
	Gpx8
	Gramd1a
	Gramd1c
	Grin2c
	Grk3
	Grk5
	Grn
	Gsdmd
	Gsto2
	Gtpbp10
	Gtpbp2
	Gusb
	Gyg
	H1f0
	H1f2
	H1f3
	H1f4
	H2-Aa
	H2-Ab1
	H2bc6
	H2-Eb1
	H2-K1
	H2-T23
	H3c6
	H3c7
	H3f3b
	H4c1
	H4c11
	H4c12
	H4c16
	H4c3
	H4c4
	H4c6
	Haao
	Hacd4
	Has3
	Haus2
	Hbb-bs
	Hbegf
	Hbp1
	Hcls1
	Hcn2
	Hcn4
	Hdac4
	Hddc3
	Hdgfl2
	Hdhd2
	Hdhd5
	Hebp1
	Herpud1
	Hexa
	Hexb
	Hexim1
	Hgf
	Hhipl1
	Hhipl2
	Hif1a
	Hinfp
	Hk3
	Hlf
	Hmgcr
	Hmgcs1
	Hnrnpc
	Hoxb4
	Hoxd4
	Hoxd9
	Hpgd
	Hpgds
	Hps4
	Hpse
	Hrh3
	Hs3st1
	Hsd17b12
	Hsd17b7
	Hspa1a
	Hspa1b
	Hsph1
	Htra1
	Hvcn1
	Icosl
	Id1
	Id2
	Idh1
	Idi1
	Ifi204
	Ifi206
	Ifi207
	Ifi208
	Ifi209
	Ifi211
	Ifi213
	Ifi27l2a
	Ifih1
	Ifit2
	Ifit3
	Ifit3b
	Ifitm3
	Ifitm6
	Ifngr1
	Ift70b
	Igf1
	Igf1r
	Igfbp4
	Igfbp5
	Igfbpl1
	Ighm
	Igsf10
	Igsf3
	Igsf6
	Igsf9b
	Iigp1
	Iigp1c
	Ikbkb
	Il13ra1
	Il1r1
	Il1rn
	Il27ra
	Il2rg
	Il31ra
	Il33
	Il4ra
	Il6st
	Impg2
	Inha
	Ino80c
	Ino80d
	Inpp5d
	Insig1
	Insyn2a
	Ints1
	Ints15
	Ints8
	Ip6k3
	Iqsec2
	Irag2
	Irak3
	Irf7
	Irs1
	Itga1
	Itga10
	Itga2
	Itga4
	Itgad
	Itgam
	Itgax
	Itgb1
	Itgb2
	Itgb3
	Itgb3bp
	Itgb5
	Itgbl1
	Itm2a
	Itpk1
	Jade2
	Jag1
	Jam2
	Jdp2
	Jmjd6
	Jrk
	Jun
	Jund
	Kalrn
	Kansl2
	Kansl3
	Kat2b
	Kbtbd3
	Kcnc3
	Kcnip3
	Kcnk13
	Kcnk9
	Kcnmb1
	Kcnn2
	Kcnq1ot1
	Kcnq2
	Kcns1
	Kcp
	Kctd13
	Kdm2a
	Kdm4b
	Kdr
	Khdc4
	Kif21b
	Kifc2
	Kirrel2
	Klf11
	Klf15
	Klf2
	Klf4
	Klhl13
	Klhl21
	Klhl29
	Klhl9
	Klk6
	Kmt2a
	Kmt2d
	Kmt2e
	Kmt5a
	Kmt5c
	Krcc1
	Krit1
	Ksr1
	L3mbtl3
	Lacc1
	Laptm4a
	Laptm5
	Larp1b
	Lat
	Lbh
	Lbp
	Lcat
	Lclat1
	Lcp1
	Ldah
	Ldha
	Leprot
	Lgals1
	Lgals3
	Lgals3bp
	Lgals9
	Lgi4
	Lgr5
	Lhfpl2
	Lhfpl4
	Lhpp
	Lif
	Lilrb4a
	Lilrb4b
	Lipo3
	Litaf
	Lix1
	Lmcd1
	Lmnb2
	Lncpint
	Lonp2
	Lox
	Loxl1
	Loxl2
	Lpar1
	Lpar3
	Lpar6
	Lpcat2
	Lpcat3
	Lpin3
	Lpl
	Lpo
	Lrat
	Lrrc1
	Lrrc45
	Lrrc55
	Lrrc61
	Lrrc8a
	Lrrc8b
	Lrrc8d
	Lrrc9
	Lrrfip2
	Lrrtm1
	Lsr
	Ltv1
	Ly6e
	Ly6g6e
	Ly86
	Ly9
	Lyn
	Lyrm2
	Lyz2
	Mafb
	Mafg
	Mag
	Magee2
	Mamdc2
	Manbal
	Manea
	Map10
	Map2k3
	Map3k13
	Map3k3
	Map3k9
	Map4k2
	Map4k5
	Map6d1
	Map7
	Mapk1ip1
	Mapk4
	Marchf1
	Marchf11
	Marcks
	Marcksl1
	Marf1
	Mark2
	Masp1
	Mast1
	Mast4
	Matcap2
	Matk
	Matn2
	Mau2
	Max
	Mboat1
	Mcam
	Mcf2l
	Mcm2
	Mcm3
	Mcm6
	Mcoln1
	Mcoln3
	Mcrs1
	Mdfic
	Me2
	Med12
	Med13l
	Med25
	Mef2c
	Mef2d
	Meox1
	Met
	Mettl25b
	Mex3a
	Mfap4
	Mfap5
	Mfhas1
	Mfn1
	Mfsd2a
	Mfsd2b
	Mfsd9
	Mgat5b
	Miat
	Mical2
	Mical3
	Micall2
	Micu2
	Mien1
	Milr1
	Mink1
	Mir124-2hg
	Mir124a-1hg
	Mir181a-1hg
	Mir1955
	Mir344
	Mir384
	Mir544
	Mir6402
	Mir654
	Mir876
	Mirg
	Misp
	Mknk2
	Mlh3
	Mlkl
	Mlxip
	Mm2pr
	Mmd2
	Mme
	Mmgt1
	Mmgt2
	Mmp11
	Mmp12
	Mmp19
	Mmp2
	Mms22l
	Mmut
	Mob3b
	Mocos
	Mok
	Mpeg1
	Mpp2
	Mpst
	Mpzl1
	Mrc1
	Mrgprf
	Mroh1
	Mroh8
	Mrpl54
	Mrpl57
	Mrps6
	Mrrf
	Ms4a6b
	Ms4a6c
	Ms4a6d
	Ms4a7
	Msantd1
	Msantd2
	Msl3l2
	Mslnl
	Msmo1
	Msn
	Msr1
	Mss51
	Mtcl1
	Mtf1
	Mtmr4
	mt-Tw
	Mvp
	Mxd1
	Mxd4
	Mxra8
	Mybpc1
	Myef2
	Myl9
	Mylk
	Myo1e
	Myo1f
	Myof
	Myrip
	Mysm1
	Myzap
	N4bp1
	N4bp2
	N4bp2l1
	Naa16
	Naalad2
	Naglu
	Naip2
	Naip5
	Narf
	Nasp
	Nat1
	Nat8f4
	Nbeal2
	Ncam2
	Ncan
	Ncapd2
	Ncapg2
	Ncbp3
	Ncf1
	Nckap1l
	Nckap5
	Ncoa3
	Ncoa6
	Ndst3
	Neat1
	Nectin1
	Nedd9
	Nek11
	Nek6
	Nepro
	Nes
	Neto2
	Neu3
	Neurl3
	Nfxl1
	Niban1
	Nifk
	Nim1k
	Ninj1
	Ninj2
	Nipsnap2
	Nipsnap3b
	Nktr
	Nlrp1a
	Nlrp1b
	Nlrp1c-ps
	Nlrp5-ps
	Nlrx1
	Nmnat3
	Nol11
	None
	None
	None
	Nopchap1
	Nos3
	Notch4
	Notum
	Nova2
	Nox4
	Noxred1
	Npc1l1
	Npc2
	Nphs1
	Npnt
	Nptxr
	Nqo2
	Nrap
	Nrde2
	Nrep
	Nrk
	Nrp1
	Nsd3
	Nsdhl
	Nsmce1
	Nt5dc1
	Ntrk1
	Nudt1
	Nudt2
	Nuf2
	Nufip2
	Nup93
	Nxpe4
	Nynrin
	Oacyl
	Oas1a
	Oas1g
	Oasl2
	Odc1
	Ogdhl
	Olfml3
	Olig1
	Omg
	Opalin
	Or51e1
	Or8b53
	Osmr
	Ostf1
	Otud7a
	Otud7b
	Ovgp1
	Oxct1
	P2ry1
	P2ry13
	P2ry2
	P2ry6
	P3h4
	P4ha1
	P4ha2
	P4ha3
	Pabpc5
	Pabpn1
	Padi2
	Pakap
	Palld
	Palm
	Pals1
	Pamr1
	Pan3
	Pantr2
	Papola
	Parp12
	Parp3
	Parp9
	Pars2
	Parvg
	Pask
	Patl1
	Pbrm1
	Pbx4
	Pcdhb11
	Pcdhb19
	Pcdhb20
	Pcdhb21
	Pcdhb22
	Pcdhb3
	Pcdhb5
	Pcdhb6
	Pcdhb8
	Pcdhb9
	Pcdhgc4
	Pcgf6
	Pcmtd1
	Pcnx2
	Pcolce
	Pcsk7
	Pdcd1
	Pdcd7
	Pde7a
	Pdgfra
	Pdk1
	Pdlim4
	Pdpn
	Peli3
	Pepd
	Per2
	Per3
	Pex13
	Pex26
	Pex3
	Pfkl
	Pgghg
	Pglyrp1
	Pgm5
	Phactr4
	Phf1
	Phf11b
	Phf11c
	Phf11d
	Phf2
	Phf20l1
	Phf21a
	Phf8
	Phip
	Phka1
	Phkb
	Phlpp2
	Phrf1
	Piezo2
	Pigp
	Pigz
	Pik3ap1
	Pik3cg
	Pilra
	Pirb
	Pitpnm1
	Pitpnm2
	Pitpnm3
	Pkd1
	Pkdrej
	Pla2g2d
	Pla2g4a
	Pla2g4c
	Plat
	Plau
	Plbd2
	Plce1
	Pld4
	Plec
	Plek
	Plekha2
	Plekha8
	Plekhg1
	Plekhg4
	Plekhh3
	Plekhm1
	Plin2
	Plin4
	Pllp
	Plpp2
	Pls1
	Pltp
	Pmp22
	Pnisr
	Pnn
	Pno1
	Pnpla2
	Pnpla6
	Pnpla7
	Polg
	Polr1f
	Polrmt
	Pom121
	Pon3
	Pou3f3
	Pou6f1
	Ppara
	Ppard
	Ppargc1b
	Ppdpf
	Ppef2
	Ppp1r12c
	Ppp1r15b
	Ppp1r1b
	Ppp1r1c
	Ppp3r2
	Ppp6c
	Pprc1
	Prag1
	Pramel12
	Prcp
	Prdm15
	Prdx1
	Prdx6
	Prelid3a
	Prelp
	Primpol
	Prkcq
	Prkd2
	Pros1
	Prox2os
	Prpf3
	Prpsap1
	Prpsap2
	Prr12
	Prr14
	Prrg4
	Prrx1
	Prss23
	Prss30
	Prss35
	Prss53
	Psd
	Psmb8
	Psmb9
	Psme4
	Pstpip2
	Ptch1
	Pter
	Ptgfr
	Ptgr1
	Ptgr2
	Pth1r
	Ptk2b
	Ptma
	Ptpn11
	Ptpn12
	Ptpn13
	Ptprc
	Ptprn
	Ptx3
	Pwwp2b
	Pxdc1
	Pxk
	Pxmp4
	Pygl
	Qdpr
	Qng1
	Rab32
	Rab40c
	Rab7b
	Rabl3
	Rac2
	Rack1
	Rala
	Ralgds
	Ranbp10
	Rap1a
	Rapgef3
	Rapgefl1
	Raph1
	Rarg
	Rarres2
	Rasl11a
	Rassf4
	Rbm12b1
	Rbm14
	Rbm3
	Rbm38
	Rbm4
	Rbm45
	Rbm5
	Rbm6
	Rc3h1
	Rcan1
	Rcan2
	Rcbtb2
	Rcn1
	Rell1
	Rere
	Retreg3
	Rfc1
	Rfesd
	Rftn1
	Rfx1
	Rfx7
	Rgs1
	Rgs10
	Rhbdd1
	Rhbdl3
	Rhebl1
	Rho
	Rhob
	Rhobtb2
	Rhoc
	Rhoj
	Rhpn2
	Rian
	Ribc1
	Ric1
	Rigi
	Riiad1
	Rims4
	Riox2
	Ripor1
	Rlbp1
	Rnase4
	Rnf122
	Rnf216
	Rnf223
	Rnf31
	Robo4
	Rp2
	Rpain
	Rpl10-ps6
	Rpl13
	Rplp0
	Rprd2
	Rps6ka2
	Rraga
	Rrbp1
	Rsad2
	Rtp4
	Runx1t1
	Rxrg
	S100a1
	S100a10
	S100a11
	S100a16
	S100a6
	S1pr3
	Safb
	Sag
	Samd12
	Samd9l
	Sar1b
	Sat1
	Sbk1
	Sc5d
	Scaf4
	Scarna2
	Sclt1
	Scrt2
	Sdc1
	Sdc4
	Sdcbp
	Sdr42e1
	Sec14l5
	Seh1l
	Sema3b
	Sema3c
	Sema3d
	Sema4c
	Sema6d
	Septin10
	Serac1
	Serinc5
	Serpina3n
	Serpinb1a
	Serpinb6a
	Serpinc1
	Serpind1
	Serpine1
	Sesn3
	Setd1b
	Setdb1
	Sez6l
	Sez6l2
	Sf3a1
	Sfi1
	Sfpq
	Sfswap
	Sft2d2
	Sfxn2
	Sgk2
	Sgsh
	Sh2d5
	Sh3kbp1
	Sh3pxd2a
	Sh3rf3
	Shc1
	Shc4
	She
	Shisa5
	Shisa7
	Shtn1
	Siah2
	Siglec1
	Sil1
	Sinhcaf
	Sirt1
	Six1
	Six4
	Skil
	Sla
	Slamf7
	Slamf9
	Slc11a1
	Slc12a3
	Slc14a1
	Slc15a2
	Slc15a3
	Slc15a4
	Slc16a1
	Slc16a3
	Slc16a7
	Slc16a9
	Slc22a13b
	Slc24a4
	Slc25a1
	Slc25a22
	Slc25a27
	Slc25a28
	Slc25a29
	Slc25a35
	Slc25a42
	Slc25a44
	Slc25a47
	Slc26a1
	Slc29a1
	Slc2a1
	Slc2a4
	Slc2a4rg-ps
	Slc30a1
	Slc34a3
	Slc35b2
	Slc35c1
	Slc35d1
	Slc35d2
	Slc35e2
	Slc38a2
	Slc38a5
	Slc39a1
	Slc39a2
	Slc45a1
	Slc46a1
	Slc49a3
	Slc4a11
	Slc4a9
	Slc5a3
	Slc5a8
	Slc66a1
	Slc66a3
	Slc6a1
	Slc6a17
	Slc6a8
	Slc7a1
	Slc7a4
	Slc7a5
	Slc7a6
	Slc9a1
	Slc9a9
	Slc9b2
	Slf2
	Slfn8
	Slfn9
	Slit3
	Slitrk3
	Sltm
	Slx4
	Smco3
	Smg1
	Smim20
	Smim5
	Smox
	Smpdl3a
	Smtnl2
	Snap23
	Snhg11
	Snhg14
	Snhg18
	Snhg4
	Snph
	Snrnp48
	Snta1
	Sntb2
	Snx1
	Snx22
	Snx4
	Socs3
	Socs7
	Sostdc1
	Sox12
	Sox13
	Sox18
	Sox21
[truncated: 352 more rows]

## Sheet: Table S5
Young v Middle-IF	Middle v Middle-IF	Young v Old-IF	Old v Old-IF
ORR1A2_dup6768	B2_Mm1a_dup4189	IAPEz-int_dup2933	L1MdTf_II_dup1991
L1Lx_I_dup960	ID_B1_dup106107	L1Lx_I_dup960	B1_Mur4_dup5320
IAPEy-int_dup198	B1F2_dup17802	PB1D7_dup22150	B1_Mur3_dup18108
B1F1_dup9665	L1MB5_dup2892	MMERVK10D3_I_dup842	IAPLTR1_Mm_dup355
IAPEz-int_dup2933	RLTR20A4_dup14056	L1MdF_III_dup5149	MTA_Mm_dup2706
MYSERV6-int_dup531	L1MdA_III_dup7593	Lx7_dup2140	IAPEz-int_dup2933
ID_B1_dup59452	RLTR4_MM-int_dup1590	ERVB4_2-I_MM_dup256	IAPLTR1_Mm_dup905
PB1D7_dup23448	B1_Mm_dup41474	Lx3B_dup400	L1MD2_dup516
Lx_dup5095	PB1D9_dup28154	MTEa_dup18054	RMER10A_dup568
MIR_dup17215	B1_Mur2_dup20948	IMPB_01_dup12576	MTC_dup1793
ERVB4_2-I_MM_dup256	MTA_Mm_dup6965	RLTR13E_dup262	B1_Mus1_dup87688
ID_B1_dup106107	MTA_Mm_dup17851	L1MdF_III_dup5148	Lx7_dup1106
MTEa_dup18054	MTA_Mm_dup2646	IAPEy-int_dup198	L1MdTf_I_dup211
ORR1A2_dup6771	RSINE1_dup107224	L1MdV_II_dup3212	L1Lx_II_dup5595
Lx3B_dup400	LTRIS2_dup319	ID_dup959	PB1D9_dup28154
L1MdF_III_dup5149	ORR1B1-int_dup63596	MERVL_2A-int_dup657	ERVB2_1-I_MM_dup2
MTA_Mm_dup7583	B1_Mus2_dup68292	L1Lx_IV_dup4801	L1MdF_I_dup3998
ID4_v_dup21205	B3_dup143960	L2d2_dup3971	RLTR24_dup84
ORR1B1_dup16415	L1MdA_II_dup5061	ID_B1_dup100114	ORR1D2_dup1580
ORR1F_dup3131	MamRep564_dup108	L1Lx_I_dup6522	RLTR40_dup802
B1F2_dup17802	PB1D10_dup60528	L1MdF_V_dup10756	RLTR4_MM-int_dup11763
L1MB5_dup2892	L1MdTf_I_dup1527	L1MdV_III_dup10651	RLTR4_MM-int_dup3131
L1MdA_II_dup5182	MT2_Mm_dup2047	Tigger13a_dup541	ORR1D1_dup1995
L1M3_dup7205	L1M3_dup7204	ERVB4_2-I_MM_dup255	L1MdF_I_dup992
PB1D9_dup28154	PB1D7_dup23448	MIRc_dup1960	IAPEz-int_dup6151
L1M3_dup7204	MT2_Mm_dup2193	L1MdTf_I_dup898	PB1_dup11467
B1_Mm_dup41474	RLTR17B_Mm_dup59068	L1MdTf_I_dup384	RSINE1_dup107227
L2a_dup909	RLTR4_MM-int_dup2563	RLTR11A2_dup2643	Lx9_dup4582
RLTR11A2_dup2643	PB1D10_dup60529	B1F1_dup9665	MTB_dup573
RLTR4_MM-int_dup10600	L1MdGf_II_dup5423	MLTR25C_dup49	B1_Mur2_dup25814
IAPEz-int_dup3568	L1MdA_I_dup2425	L3_dup7564	RMER1C_dup6058
L1MD2_dup532	L1MdA_III_dup282	B4A_dup83174	Lx7_dup13638
PB1D10_dup46048	IAPEz-int_dup2120	MTEa_dup18530	MIR3_dup5178
L1Lx_IV_dup4801	Charlie7_dup406	L1_Mur2_dup7929	RMER19B_dup5031
LTRIS2_dup319	MMERVK10C-int_dup1002	L1MdV_III_dup4224	RMER13B_dup1867
RLTR21_dup638	MT2B_dup2036	L1_Mur2_dup1165	MERVL-int_dup1593
ORR1E_dup5333	MTD_dup3718	MMERVK10C-int_dup851	IAPLTR1_Mm_dup135
MTEa_dup18530	RLTR4_Mm_dup43	MMERVK10D3_I_dup843	MYSERV-int_dup627
B4A_dup96176	IAPEz-int_dup3378	RMER5_dup7163	L1MdV_I_dup4835
L1MB4_dup2798	IAPEY3-int_dup558	ORR1A2_dup8200	L1MdF_IV_dup10000
Lx7_dup2140	L1MdTf_I_dup1628	URR1A_dup18322	L1MdA_II_dup429
L1ME2_dup298	ID_B1_dup4661	LTRIS3_dup120	L1MdV_I_dup4833
RLTR13E_dup262	IAPEz-int_dup5935	MTA_Mm_dup2706	L1Lx_I_dup6522
PB1D9_dup28153	ID_B1_dup59452	B2_Mm1t_dup18708	L1MdA_II_dup307
Tigger13a_dup541	B3_dup31490	Lx8_dup26737	L1MdTf_II_dup1748
ORR1B1-int_dup63596	L1MdTf_I_dup189	ERVB5_2-LTR_MM_dup112	RLTR25B_dup1367
Lx_dup965	MTC_dup1793	B2_Mm1a_dup9773	L1MdF_IV_dup14506
L1MdTf_II_dup2772	Lx6_dup14820	L1Lx_IV_dup4784	PB1D7_dup23448
MTEa_dup18053	IAPLTR2_Mm_dup1431	PB1D7_dup22151	L1MdFanc_I_dup416
ERVB4_2-I_MM_dup255	IAPEY4_I_dup76	B1F2_dup2639	RMER13A1_dup591
Lx_dup966	Tigger10_dup95	RLTR17B_Mm_dup35696	Lx5_dup15572
MTA_Mm_dup17300	ID4_dup4448	RLTR4_Mm_dup76	RSINE1_dup107225
L1MdF_III_dup5148	L1MdV_III_dup7935	Lx5b_dup375	MIR1_Amn_dup2323
PB1D10_dup60528	MERVL-int_dup1640	IAPLTR1_Mm_dup905	URR1B_dup4094
B2_Mm2_dup51661	RLTR20A4_dup3048	ID_B1_dup59452	L1Lx_IV_dup4801
RLTR17B_Mm_dup59068	L1MdA_I_dup4248	L1Lx_IV_dup4787	MT2_Mm_dup1181
L1MdGf_II_dup3543	MT2_Mm_dup2192	RMER4B_dup2744	B1_Mus2_dup36911
Lx5b_dup375	LTR53_dup182	PB1D9_dup28154	Lx5_dup7140
Tigger5b_Glire_dup314	PB1_dup11467	ORR1B1_dup16415	MMERVK10C-int_dup3116
MMERVK10D3_I_dup842	L1MdA_III_dup6745	IAPEz-int	L1MdA_II_dup1928
B1F_dup6576	L1MdF_II_dup1382	L1MB4_dup2798	MTD_dup3717
Tigger10_dup95	L1MdTf_III_dup1800	RLTR17_dup1032	IAPEz-int_dup5907
MMVL30-int_dup230	L1MdTf_II_dup1503	L1ME4a_dup191	PB1D11_dup5022
RLTR45_dup603	IAPEz-int_dup4929	B3_dup123397	IAP1-MM_I_dup351
L1MdF_V_dup10756	MTB_dup573	ID4_v_dup21205	hAT-N1_Mam_dup22
L1Lx_IV_dup4787	PB1D9_dup28153	B1_Mur1_dup876	LTR78_dup58
MERVL_2A-int_dup657	IAPLTR1_Mm_dup1341	Lx_dup5095	MTB_dup2880
MamRep564_dup108	L1MdA_III_dup4951	RLTR4_MM-int_dup3241	MLT1A0_dup934
PB1D7_dup7919	B2_Mm1t_dup17499	RMER12_dup148	L1MdTf_II_dup1262
ERVB5_2-LTR_MM_dup112	ORR1B1-int_dup24287	L1Lx_I_dup6520	L1MdF_IV_dup17030
RSINE1_dup107225	MTA_Mm_dup2686	RLTR10-int_dup2331	L1MdA_II_dup2473
L1MdA_III_dup7352	L1MdA_III_dup8002	Lx5c_dup8212	Tigger10_dup95
L1MdV_II_dup3212	B4A_dup62239	L1MdF_I_dup3814	L1MdGf_II_dup6040
RSINE1_dup107226	IAPEY_LTR_dup301	L1MdV_III_dup4230	L1MdF_IV_dup7898
B1F1_dup6381	RLTR10-int_dup351	RLTR21_dup2824	MT2B1_dup749
L1MC1_dup4867	B2_Mm1a_dup3726	Lx7_dup27995	L1MdV_III_dup4230
MTC_dup1793	B1_Mus2_dup68291	ORR1D1_dup22986	ID_B1_dup106107
L1_Mur2_dup1165	L1MdTf_III_dup879	PB1D7_dup23448	B3_dup47597
L1MdA_I_dup1088	IAPLTR2a2_Mm_dup1630	MMVL30-int_dup230	B1_Mus1_dup7855
Lx9_dup25174	MMVL30-int_dup1190	Lx_dup966	Lx9_dup4581
ID2_dup4687	L1MA5_dup532	L1MdV_II_dup3213	L1MdTf_II_dup2731
L1MdA_VI_dup3129	L1MdF_III_dup6196	L1MA8_dup3449	B3A_dup8572
ERVB5_1-I_MM_dup99	IAPLTR1_Mm_dup651	B1_Mur1_dup13954	L1MdGf_I_dup1693
RMER12_dup148	MER5A_dup1740	ORR1B1_dup16914	RLTR19-int_dup982
ORR1B1-int_dup3419	RSINE1_dup22642	IAP1-MM_I_dup13	L1MdGf_I_dup862
L1_Mur2_dup7929	L1MdA_III_dup7378	MamRTE1_dup727	MMVL30-int_dup326
ID_dup959	RLTR33_dup837	L1Lx_IV_dup6128	L1MdA_III_dup3638
B4A_dup83174	IAPEz-int_dup1042	L1MdTf_II_dup652	L1MB5_dup2892
L1MdTf_III_dup1503	L1MdTf_III_dup693	Lx9_dup44828	MTD_dup4062
RMER16-int_dup1261	L1MdA_III_dup2718	RLTR16_dup968	LTRIS4B_dup21
RLTR20A4_dup14056	RSINE1_dup60116	L2d_dup3018	B2_Mm2_dup9550
ORR1A0_dup335	IAPEz-int_dup508	PB1D10_dup35289	RLTR17B_Mm_dup37740
IAPEz-int_dup6229	L1MdTf_II_dup3128	MIR_dup23929	ORR1B1-int_dup63596
B1_Mus2_dup68293	RSINE1_dup39309	L1MdF_V_dup6384	B3_dup140971
MLTR25C_dup49	RLTR51B_Mm_dup461	RLTR4_MM-int_dup3131	MLT2B2_dup181
B4A_dup41855	ID_B1_dup11420	Tigger18a_dup37	L1MB8_dup828
B3_dup143960	ORR1E_dup23848	RLTR45-int_dup39	MTE-int_dup2061
PB1D9_dup9286	IAPLTR1a_Mm_dup268	B1F_dup19167	L1M3_dup7204
L1Lx_I_dup6520	B3A_dup42043	RSINE1_dup107225	L1MdF_II_dup3286
MTB_dup303	RLTR4_Mm_dup166	RLTR4_MM-int_dup9059	L1MdTf_I_dup1816
B3A_dup44510	RLTR10C_dup636	L1MdV_I_dup4834	MERVL-int_dup1637
B4A_dup91049	L1MB2_dup2553	B4A_dup96176	RSINE1_dup30588
RLTR22_Mus_dup115	ID2_dup4566	L1MdF_IV_dup7892	PB1D11_dup5020
MIRb_dup39777	B3_dup50321	RMER12C_dup10322	MLTR25A_dup864
L1MdGf_II_dup5423	L1MdTf_II_dup1480	L1MdA_III_dup3360	RLTR4_MM-int_dup9059
L1Lx_I_dup6522	Arthur2_dup113	IAPEz-int_dup2388	B2_Mm1a_dup972
B1_Mus2_dup68292	B4A_dup95650	MIRb_dup14521	MTC_dup12797
B1_Mus1_dup47613	L1MdTf_I_dup791	B4A_dup91859	L1MdFanc_II_dup13523
Lx3C_dup108	RLTR20A3_MM_dup172	Tigger5b_Glire_dup314	URR1B_dup9115
L4_A_Mam_dup561	IAPEz-int_dup4777	L1MC1_dup4867	RMER15_dup3302
B4A_dup21840	L1MdGf_I_dup1514	Lx_dup965	RSINE1_dup107224
Tigger18a_dup37	L1MdA_I_dup2806	L2_dup17303	Charlie30a_dup18
ID4_dup4448	IAPEz-int_dup4700	RLTR4_MM-int_dup10600	L1Lx_IV_dup4787
B3_dup123196	ETnERV-int_dup297	L1MdTf_III_dup4205	L1MA9_dup391
L1MdFanc_I_dup9297	L1MdA_II_dup4979	Lx6_dup16074	MIR3_dup9440
MurSatRep1_dup174	B3_dup64504	MusHAL1_dup623	Lx4A_dup4663
ORR1D1_dup22883	MurSatRep1_dup111	MTE-int_dup2062	RLTRETN_Mm_dup432
RSINE1_dup68727	B1F1_dup15774	B2_Mm2_dup52430	Lx5_dup7143
B4A_dup54297	PB1D10_dup5977	B2_Mm2_dup20458	B1_Mur2_dup1924
IAP1-MM_I_dup13	L1MdTf_III_dup1323	UCON14_dup29	PB1D9_dup15174
L3b_dup125	L1MdTf_III_dup981	L1Lx_IV_dup880	B1_Mus2_dup68293
PB1D7_dup8593	L1MdF_III_dup10314	MT2A_dup2273	L1_Mur2_dup7929
B1_Mus2_dup68291	L1MdTf_III_dup3886	Arthur1A_dup15	Tigger10_dup97
RMER5_dup7163	L1MdTf_II_dup3372	RLTR19-int_dup984	L1MdV_I_dup4834
Lx7_dup24264	IAPEz-int_dup7202	Lx8_dup42552	L1MC2_dup629
RSINE1_dup18891	RLTR4_MM-int_dup9788	L1_Rod_dup11644	L1MdA_II_dup987
L1MD2_dup242	L1MdTf_I_dup1401	ID_B1_dup50178	ORR1E_dup13084
Lx9_dup8330	MTEa_dup8621	L1MdA_IV_dup4827	L2a_dup17377
L2a_dup21774	RLTR45_dup603	B1_Mur1_dup464	L1Lx_II_dup5593
L1Lx_IV_dup4784	L1MdTf_III_dup642	Lx10_dup4175	L1MdTf_III_dup1172
B1_Mur1_dup876	L1MdTf_II_dup2782	L1MdN_I_dup1700	L1MdTf_III_dup2258
RLTR24_dup83	ERVB4_2-I_MM_dup30	MTE2b_dup16355	L1MdA_II_dup2766
RMER12C_dup10322	B2_Mm2_dup5097	L1MdGf_II_dup3543	ORR1E_dup23848
B2_Mm1t_dup4822	L1MdTf_III_dup3407	MER20_dup4623	B2_Mm1t_dup8465
L1MdA_I_dup2635	B1_Mur4_dup15920	Lx9_dup44823	IAPEz-int_dup2105
L1MEg_dup183	Tigger22N1_dup54	L1MdA_VII_dup3229	ORR1D1_dup10580
B2_Mm2_dup45592	IAPEz-int_dup7341	RLTR4_MM-int_dup11582	MTE2a_dup1782
PB1D10_dup52261	Lx5c_dup13415	Lx5c_dup9027	IAPEz-int_dup930
Charlie7_dup406	ID_B1_dup42658	L1MdV_III_dup9182	MIR3_dup7536
RLTR4_MM-int_dup3131	IAPEz-int_dup6911	Lx8_dup42699	IAPEz-int_dup4607
PB1D10_dup60529	L1MdF_III_dup890	MTEa_dup18053	RLTR20B3_dup840
B3A_dup90215	Lx7_dup72	PB1D10_dup15391	L1MdA_III_dup3571
L1MdA_IV_dup4827	IAPEz-int_dup1520	Lx3_Mus_dup8564	RMER17C_dup2075
RSINE1_dup14344	L1MdA_II_dup3708	B1F2_dup5019	L1MdTf_II_dup1487
ORR1A2_dup8200	L1MdF_III_dup12617	B3_dup77527	L1MdA_III_dup363
L1MdF_IV_dup7892	IAPLTR1a_Mm_dup137	L1ME1_dup1868	L1MdV_III_dup4226
RLTR24_dup84	L1MdTf_III_dup1948	B3_dup1840	B3_dup104681
PB1D7_dup22150	PB1D7_dup6364	B3_dup123196	MIRb_dup3576
RLTR4_Mm_dup43	RSINE1_dup47894	MTD_dup27789	B3A_dup25936
B2_Mm2_dup52430	L1Lx_IV_dup12010	B4A_dup50486	L1MdTf_III_dup1641
RLTR4_Mm_dup39	IAPLTR1a_Mm_dup835	B3_dup59369	RLTR42-int_dup661
B3_dup18221	MTA_Mm_dup1626	PB1D11_dup2276	MLT2B2_dup179
Chap1_Mam_dup41	L1MdTf_II_dup1991	Lx_dup3948	L1MdTf_I_dup1496
B3A_dup50126	ID_B1_dup75057	L1MdA_III_dup5241	IAPEz-int_dup805
IAPLTR2a2_Mm_dup1174	ORR1C2_dup9764	PB1D9_dup9286	L1MdTf_III_dup2811
L1MdA_II_dup4030	MT2_Mm_dup1256	MurSatRep1_dup2804	L1MdFanc_II_dup10808
MTC_dup1794	RSINE1_dup40871	RLTR17B_Mm_dup3949	L1MdTf_I_dup1045
B1_Mur4_dup3189	B3_dup5751	ORR1F_dup3131	L1MdF_III_dup12644
L1MdA_I_dup3479	PB1D7_dup22163	L2b_dup7345	L1MdA_III_dup6508
MTD_dup3717	B1_Mus2_dup68293	MIRb_dup1934	L1_Mur2_dup16262
B2_Mm1a_dup17609	RLTR40_dup655	L1MdA_I_dup3372	B1_Mus2_dup68292
B4_dup21515	L1MdTf_II_dup427	RMER5_dup7162	ORR1F_dup625
IAPEz-int_dup779	MIR3_dup13393	L1ME3A_dup307	ORR1B1-int_dup32678
ORR1A0_dup339	L1MdTf_I_dup1581	B3A_dup39422	L1MdTf_I_dup133
B2_Mm1a_dup1284	B4A_dup23116	Lx8_dup56698	MLTR14_dup1247
B3_dup77527	MLTR25A_dup2047	ID_B1_dup84556	IAPEz-int_dup513
B3_dup1840	B4A_dup42123	B3_dup123396	L1Lx_III_dup11364
Lx7_dup826	B4_dup61577	PB1D9_dup4861	L1MdA_III_dup1327
Lx2_dup1429	L1MdA_I_dup42	B1_Mur2_dup18581	IAPEz-int_dup5664
ORR1D1_dup22986	B3A_dup46790	L1MdGf_II_dup3431	RMER6A_dup1104
MTB_dup573	L1MdTf_II_dup679	L1Lx_III_dup5503	MTD_dup47871
Tigger10_dup97	RLTR10-int_dup304	ORR1F_dup21117	MMETn-int_dup174
IMPB_01_dup14522	MMERVK10C-int_dup3022	L1_Mur2_dup19222	B1_Mur1_dup10330
B1F_dup936	L1MdA_I_dup2730	B4A_dup91860	Lx3A_dup2057
IAPEz-int_dup4700	MamRTE1_dup1105	L1Lx_IV_dup4799	ID_B1_dup35700
Lx8_dup56698	RSINE1_dup48660	RLTR45-int_dup38	B3_dup136811
RSINE1_dup107224	RMER15_dup2008	IAPEz-int_dup779	L1MdA_III_dup5565
Lx3A_dup6247	IAPEz-int_dup663	ORR1A0_dup339	MTC_dup12381
L1MdF_III_dup6196	B1_Mur1_dup21189	MER2_dup8907	MTD_dup35125
MER2_dup10135	RLTR11A2_dup651	Lx8b_dup21938	B1F1_dup9665
Lx_dup10588	L1MdA_II_dup1825	L1MdTf_I_dup1447	RSINE1_dup107226
L2_dup11449	MMERVK10C-int_dup2557	B1_Mus2_dup68293	PB1D10_dup25768
ORR1C1_dup1835	L1MdF_IV_dup3030	L1M1_dup671	B2_Mm1t_dup6505
PB1D9_dup12567	Lx7_dup13638	Lx8_dup52649	B3_dup77527
PB1D10_dup46041	L1MdTf_II_dup3129	MT2A_dup9131	B1_Mur2_dup24615
MLT1B_dup4180	MurSatRep1_dup1987	RLTR11A2_dup2081	RMER19A_dup61
L1MdTf_II_dup3390	PB1D9_dup24584	B1_Mus1_dup79888	B2_Mm2_dup85116
L1MdV_II_dup3213	MT2_Mm_dup2339	MTD_dup45698	MTE-int_dup2062
URR1A_dup15576	B1F_dup20712	ORR1A2_dup13641	B1_Mus1_dup8294
Lx_dup13335	MTA_Mm_dup12363	MTA_Mm_dup17300	B1F_dup36264
RMER20B_dup57	L1MdTf_II_dup2106	MIRb_dup39777	PB1D10_dup19726
Lx9_dup44828		B4_dup55479	PB1D9_dup26118
B4_dup1240		UCON29_dup100	Lx5c_dup9027
MT2A_dup3389		L1MdA_III_dup8511	Lx7_dup1107
L1MdTf_II_dup719		B1_Mur1_dup13496	MMERGLN_LTR_dup207
LTRIS3_dup120		Lx7_dup12237	ID4_v_dup20291
L3_dup7564		RLTR20A2B_MM_dup15	L1MdFanc_I_dup415
IMPB_01_dup12576		L1MdA_I_dup3391	MYSERV6-int_dup734
ORR1D1_dup5462		MIR_dup30979	RLTR11A2_dup2643
MTD_dup19091		L1M4b_dup1603	MTA_Mm_dup14055
ETnERV3-int_dup597		Lx5b_dup3704	L1MdTf_II_dup653
B3A_dup33787		ORR1D1_dup6212	RMER16-int_dup2462
L1MdA_I_dup1333		MurSatRep1_dup2712	RLTRETN_Mm_dup889
Lx3C_dup4387		RMER19C_dup1278	B1_Mur1_dup13637
RSINE1_dup11861		ID4_v_dup35	L1MdMus_II_dup8534
B2_Mm2_dup33686		RLTR4_Mm_dup39	RLTR4_MM-int_dup3126
MTD_dup2170		Lx5_dup13502	B4_dup17005
L1Lx_I_dup1384		L1MdA_I_dup3479	L1MdTf_II_dup2599
L1MdTf_III_dup2796		Lx_dup13335	ID_B1_dup19756
L1MdA_I_dup4150		ORR1B1-int_dup60094	L1MdA_II_dup4465
IAPEz-int_dup4436		B1_Mm_dup16251	MLT1A_dup2228
MLTR25A_dup1583		B1_Mus1_dup88107	L1MdMus_II_dup7950
ID_B1_dup35700		UCON47_dup46	ID_B1_dup59452
IAPLTR2_Mm_dup161		B3_dup123398	RLTR45-int_dup38
L1MdV_III_dup4224		Lx3B_dup2308	B2_Mm2_dup6271
RLTR20A2B_MM_dup15		L1ME3B_dup116	L1MdGf_I_dup820
B1_Mus2_dup22956		L2a_dup1778	B2_Mm2_dup45591
L1MdGf_I_dup2088		Lx8b_dup17403	MamRTE1_dup2818
IAPEY4_I_dup383		RMER20B_dup57	B2_Mm1a_dup12185
L1M4a1_dup499		MER5A_dup7505	B1_Mur4_dup6870
MTE2b_dup15963		RLTR20A4_dup912	L1MdA_II_dup3849
MMERVK10C-int_dup3059		Chap1_Mam_dup41	Lx4A_dup1540
Lx3_Mus_dup8564		L1_Rod_dup10655	B3_dup8151
ORR1D1_dup22882		RMER15_dup3462	MER20_dup1577
L1MdGf_I_dup1980		Lx8b_dup630	Lx8_dup41923
L1MdF_V_dup10292		L2a_dup16329	L1MdFanc_I_dup9278
L1MdTf_III_dup4276		L1MdF_IV_dup17934	Lx9_dup43478
L1MD_dup4070		RMER17C-int_dup977	Lx_dup11206
RLTR14_dup1601		L1MdF_V_dup6618	MIR_dup12429
L2d_dup3018		L1Lx_III_dup11818	B3_dup66892
PB1_dup11467		L1MdA_VI_dup3129	MMETn-int_dup57
L1MdF_I_dup3814		URR1A_dup1180	IAPEz-int_dup3144
L1MdA_I_dup2273		L1M3_dup7204	IAPEz-int_dup27
Lx3A_dup6245		RLTR17B_Mm_dup55421	L1MdMus_II_dup1370
RMER5_dup552		MER5A_dup4517	B3A_dup41463
MERVL-int_dup1912		MTD_dup35125	L1MdA_IV_dup4791
B1F1_dup439		B3A_dup24954	MER3_dup2104
B2_Mm1a_dup9426		MER33_dup808	B4A_dup76728
RMER17C2_dup57		B2_Mm2_dup40510	RMER1A_dup2223
MLT1J1_dup1073		ORR1A3-int_dup8948	L1MB5_dup1097
L1Lx_IV_dup1077		Lx8b_dup26573	ID_B1_dup15424
Lx10_dup7678		L1MdF_V_dup6619	L1MdTf_II_dup1601
L1MdF_I_dup839		L1MDa_dup2521	RLTR13D3_dup96
MIRb_dup1934		ORR1A4_dup7621	Lx8_dup56698
ID_B1_dup42867		L1MdF_IV_dup4739	MamRep564_dup108
L1MdV_III_dup4230		B3A_dup50126	L1MdF_IV_dup15805
Lx8_dup4548		B1_Mus2_dup31057	MTA_Mm_dup145
RMER19C_dup254		BGLII_Mur_dup420	L1MdTf_III_dup648
ORR1B1-int_dup16335		Lx5b_dup5982	MurSatRep1_dup2627
PB1D10_dup20318		B1_Mur2_dup18529	IAPEz-int_dup1291
L1MdF_V_dup6384		B1_Mus1_dup80000	RLTR4_MM-int_dup10688
B1_Mur4_dup9669		L3_dup7521	IAPEz-int_dup7367
Lx5_dup7143		Lx3C_dup108	L1MdGf_II_dup844
Lx5_dup7140		URR1A_dup19767	ORR1A2_dup1185
L1MdA_III_dup336		RSINE1_dup35089	L1MdV_III_dup4224
RLTR4_MM-int_dup11166		Lx6_dup1288	L1Lx_I_dup2266
MTE-int_dup2062		B3A_dup89562	L1MdTf_II_dup141
RLTR22_Mur_dup815		PB1D10_dup52261	L1MdA_VII_dup3229
L1Lx_I_dup3		Lx5_dup15012	MTA_Mm_dup2777
L1Lx_II_dup418		RSINE1_dup38262	L2a_dup3280
L1MdA_VII_dup6991		RLTR4_MM-int_dup10070	L1MdTf_I_dup41
B1_Mus2_dup21607		B1F_dup20675	L1MdTf_III_dup496
B2_Mm1t_dup22902		RLTR10_dup2611	L1MdTf_II_dup2196
MTEa_dup3681		RSINE1_dup64380	B1_Mus1_dup9693
L1MdV_III_dup2281		Lx8_dup17166	RSINE1_dup70089
L1MdGf_II_dup6238		RSINE1_dup104765	L1MdTf_III_dup4512
B2_Mm1t_dup8466		Charlie15a_dup99	L1MdA_VI_dup3525
L1Lx_I_dup16882		L1_Mur2_dup17686	B1F2_dup3418
L2_dup1413		ORR1E_dup19923	PB1_dup2579
RMER13B_dup861		RMER1B_dup5756	B1F1_dup7723
IAPEz-int_dup4302		MT2A_dup1605	PB1D7_dup1252
MER34A_dup573		L1M2_dup7630	ID_B1_dup11434
ID_B1_dup88631		RMER17B_dup360	X5a_DNA_dup38
RLTR21_dup2824		AmnSINE1_dup230	Lx7_dup16280
B2_Mm1t_dup15616		ORR1B1_dup5001	L1MdTf_III_dup3892
B2_Mm2_dup5097		B1_Mus1_dup23179	ETnERV-int_dup769
RLTR15_dup43		B3_dup9968	MamRTE1_dup1961
RLTR25B_dup3169		B3_dup145923	IAPEz-int_dup3653
Lx10_dup4176		B4A_dup41855	L1MC1_dup2534
MTE2b_dup10941		PB1D10_dup19976	L1MdTf_I_dup2280
L1Lx_I_dup5938		Lx8b_dup26570	RLTR6_Mm_dup230
MTB_dup3087		RLTR21_dup638	L1MC2_dup630
RMER17C-int_dup977		L1MdTf_I_dup1081	MLT1K_dup410
B1F1_dup7051		PB1D10_dup13187	PB1D11_dup7111
B3_dup123398		MIRb_dup1982	B1_Mus2_dup17654
B3_dup75236		RMER19B_dup2198	B1_Mur4_dup9025
B4A_dup1292		MLTR14_dup5630	RLTR21_dup290
URR1A_dup12979		Lx4A_dup8031	RMER12B_dup374
L1MA8_dup3449		L1ME2_dup298	IAPEz-int_dup2943
L1Lx_I_dup8		ORR1A4_dup6575	MurSatRep1_dup2101
L1MdTf_III_dup3934		RLTR4_MM-int_dup2409	IAPEz-int_dup6569
RSINE1_dup39309		L1MdTf_II_dup2640	MT2A_dup3551
IAPEz-int_dup6006		L1MdF_V_dup5056	ID_dup7208
L1MdA_I_dup1724		MERVL-int_dup1593	MERVL-int_dup941
L1MdF_IV_dup13215		L3b_dup125	Lx4A_dup4658
MMVL30-int_dup518		MMSAT4_dup615	MTD_dup29361
Lx2_dup500		L1MdTf_III_dup3821	BGLII_B_dup525
ID4_v_dup15515		Lx8b_dup11952	RLTR24_dup83
B1_Mus2_dup31057		B1_Mus1_dup45043	B1_Mus1_dup60984
Lx5c_dup1017		L1MdA_VI_dup768	B1_Mus2_dup29904
L1MdGf_I_dup169		B1_Mus1_dup41091	PB1D10_dup20321
L1MdTf_I_dup844		L1Lx_II_dup5005	RLTR19-int_dup821
Charlie1_dup647		MMVL30-int_dup518	IAPEz-int_dup6229
MER76_dup118		MamRTE1_dup3711	L1MdF_III_dup5148
IMPB_01_dup5885		PB1D7_dup7895	B1F_dup12269
L1MdV_I_dup4834		L1Lx_II_dup418	PB1D10_dup60529
MMERVK9C_I_dup377		RLTR13D3A_dup100	L2c_dup5624
L2_dup275		RSINE1_dup1282	B1F2_dup2639
L1MdA_VI_dup768		MTD_dup50114	RLTR4_MM-int_dup2386
ORR1A4_dup6575		URR1B_dup12938	B1F_dup6914
B1_Mus1_dup32655		ID4_dup19999	B4_dup44912
L1Lx_I_dup12261		B1_Mus2_dup26811	RLTR42-int_dup133
Tigger5b_Glire_dup1257		B3A_dup35529	Lx8_dup50363
L1MdF_III_dup5783		URR1A_dup15576	B3A_dup35955
RSINE1_dup105722		MurSatRep1_dup2798	B4_dup17545
ORR1A1_dup687		UCON26_dup97	MTA_Mm_dup3496
MMAR1_dup135		B4A_dup55568	L1Lx_III_dup7856
ORR1C1_dup1367		B1F_dup935	L1MdF_I_dup991
MIR_dup5458		ORR1D1_dup22882	L1MdV_III_dup4225
MERVL-int_dup390		L1MdF_III_dup5151	RLTR4_MM-int_dup3241
ORR1D1_dup429		RSINE1_dup107226	L1_Mur2_dup9862
Lx8b_dup924		ID_B1_dup50752	RLTR4_MM-int_dup3906
L1MB7_dup4957		MTC_dup6642	B1F_dup935
ORR1G_dup3177		B4A_dup76728	L1MdTf_II_dup700
B2_Mm1t_dup4917		MYSERV-int_dup142	MER5A_dup1740
MTEb_dup8807		MER135_dup139	L1MdTf_I_dup2316
MusHAL1_dup623		Tigger10_dup95	Lx2A1_dup2764
MTC_dup11747		PB1D11_dup4450	L1MA5_dup437
RLTR17B_Mm_dup27096		ORR1D1_dup11666	B2_Mm2_dup2166
B3_dup93451		ID_B1_dup54973	L1MdA_I_dup2393
MIRc_dup1960		B1F_dup2000	RMER1A_dup587
Lx7_dup22099		B3_dup5279	ID2_dup4687
L1MdTf_III_dup3662		RLTR17B_Mm_dup52548	B3_dup78616
L1MdA_II_dup1060		ORR1D2_dup16896	RMER17C-int_dup977
PB1D10_dup35289		L2_dup11449	B3A_dup88557
MIR_dup23929		ID4_v_dup20291	L1MdA_II_dup3198
IAPEY2_LTR_dup28		PB1D9_dup12567	RLTR4_MM-int_dup11583
IAPEz-int_dup6001		L2_dup1414	L1M2_dup5692
L1Lx_I_dup8159		Lx3B_dup5051	L1MdA_VII_dup3258
L1MdGf_II_dup1361		IAPEz-int_dup877	B3A_dup23903
L1MdF_V_dup9186		B4_dup25754	B2_Mm2_dup53902
IAPEz-int_dup1042		MER58A_dup2673	L1MdF_III_dup206
L1Lx_IV_dup880		IAPLTR3-int_dup15	L1MdA_III_dup7233
IAPLTR4_I_dup18		PB1D7_dup9643	RLTR17B_Mm_dup24531
L2_dup276		MLTR18_MM_dup54	ORR1B1-int_dup11894
B1_Mur3_dup16127		Lx9_dup45919	RLTR13D3_dup80
MTE2b_dup16355		L1MdGf_II_dup5594	Tigger6_dup81
Lx3C_dup746		RLTR13D3A1_dup535	IMPB_01_dup17348
B4A_dup37833		L1_Mur3_dup1550	ORR1B1_dup3036
IAPEz-int_dup7		L1MB5_dup2892	L1MdA_VII_dup8970
ORR1B1_dup8456		L1MdGf_II_dup785	ID_B1_dup25054
L1_Mur1_dup4848		IAPEz-int_dup5663	RLTR4_MM-int_dup1471
ID4_v_dup35		RLTR20A4_dup13	IAPEz-int_dup1402
L1MdTf_II_dup956		B1F1_dup9686	MTA_Mm_dup5432
B1_Mur2_dup3921		ID_B1_dup103686	IAPEz-int_dup5692
L1_Mur1_dup163		Lx3A_dup7583	B4_dup5848
Lx2B2_dup1538		HAL1b_dup91	MIR_dup14532
MIR3_dup13393		ID_B1_dup90150	MTA_Mm_dup12554
B4A_dup21872		Lx5b_dup5888	B1F_dup20778
Lx8b_dup16726		Lx7_dup5465	RSINE1_dup5366
PB1D7_dup906		L1MdA_VII_dup8877	Lx5c_dup2093
L1MdGf_II_dup5641		MIR1_Amn_dup3929	MER33_dup176
RLTR17B_Mm_dup1076		Lx3A_dup6694	B1_Mur1_dup18441
L1MdTf_II_dup1784		MERVL_2A-int_dup658	RLTR10_dup255
RLTR20C1_MM_dup3333		MLTR18_MM_dup368	L1MdGf_II_dup3005
L1MdV_III_dup9182		B1F2_dup12304	RLTR4_MM-int_dup3679
Lx4A_dup8415		L4_A_Mam_dup561	IAPEz-int_dup3145
L1MdGf_II_dup7653		L2_dup1415	MTC_dup10115
MER58A_dup1207		B4_dup4785	RMER1B_dup1167
Lx7_dup12237		MLT1B_dup6645	MurSatRep1_dup1189
L1MdF_IV_dup10001		MurSatRep1_dup2539	MTEb_dup11914
Charlie16a_dup10		RMER1B_dup2295	ORR1E_dup24212
L1MdA_III_dup1463		L1MdFanc_I_dup10512	MTEa_dup18530
L1MdA_I_dup4294		Lx8b_dup22421	MYSERV6-int_dup1320
L2b_dup128		B2_Mm1a_dup972	ORR1A1_dup687
ID_dup1272		B2_Mm2_dup62580	MMERVK10C-int_dup1241
RMER16A2_dup86		ID_B1_dup72948	L1MdF_I_dup10047
PB1D10_dup50023		Kanga11a_dup64	B4A_dup7636
RLTR1C_dup87		RSINE1_dup11861	B1_Mur3_dup10996
L1MdFanc_II_dup6209		L2_dup14630	MTC-int_dup617
ID4_v_dup8955		L1MdGf_I_dup2378	PB1_dup6140
MTA_Mm_dup15635		B2_Mm1t_dup11830	IAPEY4_I_dup122
ID_B1_dup10987		ORR1B1-int_dup16335	B1F_dup18687
Lx9_dup27875		MLTR11B_dup1824	Lx5_dup15571
L1MdA_V_dup1304		B1F_dup936	RMER16C_dup96
Charlie5_dup1640		L1MdA_I_dup2635	IAPEz-int_dup1736
Tigger20a_dup137		ORR1D1_dup22985	Lx3A_dup2900
IAPEz-int_dup1706		L1ME1_dup1205	RLTR4_MM-int_dup3239
B2_Mm1a_dup6502		MIR_dup30987	L1MdV_II_dup3212
MYSERV16_I_dup337		X12_DNA_dup152	PB1_dup6110
IAPEz-int_dup6283		B4A_dup40681	IAPEz-int_dup4059
L1MdA_II_dup110		ID4_v_dup13009	L1MdMus_I_dup5465
L1MdGf_I_dup307		PB1D10_dup60217	L1M4_dup10120
MurSatRep1_dup1773		MTE2b_dup291	MTE2b_dup6278
B4_dup53974		L1MdV_III_dup2281	B1F_dup28277
B1_Mus2_dup26811		B1F2_dup17802	L1MdTf_II_dup3115
L1M2_dup13566		MLT1B_dup4180	B3A_dup31708
L1MdA_II_dup356		RSINE1_dup107904	L1MdGf_II_dup4038
MTA_Mm_dup1625		L1MC1_dup4925	RMER6A_dup1951
B4A_dup55562		L1MdA_I_dup2436	RMER12B_dup547
Lx8b_dup1190		L1MC4_dup5061	RLTR40_dup2299
L2d2_dup3971		RLTR22_Mur_dup2412	MER57C2_dup321
RLTR26_dup233		B1_Mur1_dup10522	L1MdTf_II_dup1847
MER33_dup176		Lx8_dup14219	ID_B1_dup99043
L1MdF_I_dup4000		L2a_dup909	L1Lx_IV_dup10357
L1MdA_I_dup1097		MIRc_dup19942	RLTR19-int_dup984
L1MdFanc_II_dup5220		RLTR10D2_dup127	RLTR45_dup478
MMERVK10C-int_dup1557		B1F1_dup7083	IAPLTR1_Mm_dup1169
L1MdV_III_dup10651		MER5B_dup4723	RMER13A1_dup121
L1MdA_I_dup759		MER3_dup1541	L2c_dup4505
RMER5_dup1289		L1MdA_III_dup561	L1MdF_I_dup4000
Lx2_dup11865		L1M3_dup2282	L1MdV_I_dup1618
ORR1A2_dup1189		MurSatRep1_dup1217	L1MdTf_III_dup939
Lx8_dup52649		MurSatRep1_dup274	MTEa_dup9840
L2_dup1414		MurSatRep1_dup1122	L1Lx_IV_dup4788
L1MdGf_I_dup49		B2_Mm1a_dup1990	ORR1A4_dup3505
IAPEY4_I_dup436		ID4_dup14716	L1MdA_I_dup1178
MLT1A_dup361		L1M3_dup7205	B3_dup127196
ORR1D1_dup428		L1MB5_dup1097	L3_dup7233
B4A_dup21622		L1Lx_I_dup18819	RMER15-int_dup556
RSINE1_dup38262		B4A_dup1284	RLTR13A3_dup234
MTA_Mm_dup7996		RLTR45_dup478	L1MdA_I_dup808
IAPEz-int_dup508		L1ME4a_dup727	LTR16E1_dup111
B1_Mus1_dup46734		MERVL_2A-int_dup1045	RSINE1_dup31556
ORR1B1_dup6170		B1_Mus2_dup56260	L1MdV_III_dup4228
B2_Mm2_dup20458		L1MdV_II_dup558	Lx7_dup7278
L3_dup8773		Tigger19a_dup589	MYSERV-int_dup743
MT2B_dup1031		L1MdF_V_dup10292	B2_Mm2_dup84716
PB1D10_dup60921		RLTR11A2_dup887	L1MdA_I_dup3775
B1_Mus1_dup44506		MLTR14_dup5629	ERVB7_1-LTR_MM_dup540
Lx8_dup56457		L1MdGf_II_dup4109	MRLTR33_dup77
MTD_dup27789		ID4_v_dup148	L1MdA_III_dup3354
L1MdTf_III_dup3800		Lx6_dup18434	B1_Mus2_dup54594
ETnERV-int_dup617		MT2B_dup7843	B4A_dup96030
RLTR1B-int_dup896		L1M2_dup12162	ID_B1_dup100149
L1MdTf_II_dup2754		B1_Mm_dup34394	L1MdF_IV_dup338
B2_Mm1t_dup8465		L1MDa_dup1626	RSINE1_dup46299
L1MdGf_II_dup3461		RMER17C-int_dup793	IAPLTR2_Mm_dup1397
Lx8_dup35275		L1MdF_III_dup2534	L1Lx_III_dup7625
L1MdA_II_dup4357		ID_B1_dup19176	L1MdV_I_dup10560
MurSatRep1_dup1605		PB1D7_dup8809	L1MdTf_I_dup1894
L1MdA_III_dup4825		Lx9_dup36960	B2_Mm2_dup56638
L1MdF_IV_dup10000		ORR1B1_dup16537	ORR1B1-int_dup4444
L1MdA_II_dup2285		MurSatRep1_dup2383	Lx5_dup7142
L1Lx_IV_dup4799		MLTR13_dup45	MTB_dup4887
RLTR35B_MM_dup473		MurSatRep1_dup311	B2_Mm1t_dup7958
L1MdA_III_dup5042		L1MdA_IV_dup5838	L1MdA_II_dup4329
L1MdA_I_dup436		B3_dup75499	B1F_dup13644
MTD_dup3718		B1_Mus2_dup38927	L1MdF_IV_dup3043
PB1D11_dup5020		MIR_dup36432	L1MdV_III_dup9891
IAPEz-int_dup2597		AmnSINE1_dup883	B3_dup135736
L1MdTf_II_dup2188		URR1A_dup9939	L1MdGf_II_dup6586
PB1D7_dup15381		Charlie16a_dup10	Lx5_dup8493
B1_Mus2_dup3386		L1MdV_III_dup2362	IAPEz-int_dup2463
B2_Mm1a_dup9734		B1F2_dup14776	L1MdF_V_dup5561
L1M4a1_dup742		B1F_dup2151	MLT2B1_dup52
Charlie15a_dup45		MMERVK9C_I_dup377	L1MdFanc_I_dup246
L1MdGf_II_dup3733		Lx2_dup15034	B3_dup113923
IAPEz-int_dup1709		L1MdF_I_dup3998	RLTR4_MM-int_dup9904
LTR78_dup130		RSINE1_dup34889	ID4_dup21404
ORR1A3-int_dup8948		MurSatRep1_dup2752	L1Lx_II_dup2532
MTD_dup47871		L1MdA_IV_dup5739	L1_Mur3_dup21364
RMER17B2_dup267		MTD_dup11321	ID4_v_dup17794
B3A_dup39422		MTEb_dup10097	B2_Mm2_dup20458
RLTR10_dup865		L2_dup1847	IAPEz-int_dup3715
L1MdV_I_dup982		RMER10A_dup1916	B2_Mm2_dup85959
L1M4_dup6204		Tigger19b_dup317	B1_Mur3_dup10677
L1MdA_I_dup3827		Lx3C_dup6531	Lx6_dup258
B1_Mus1_dup45043		ORR1A2_dup13642	IAPEz-int_dup5315
L1MdGf_II_dup7413		ID_B1_dup96923	B1_Mur1_dup37467
L1M4_dup7726		L1MdF_V_dup6620	L1MdV_III_dup5421
RLTR11A_dup2185		L2a_dup19488	B3A_dup57949
B3_dup23056		MTA_Mm_dup5026	MER68B_dup71
MLTR11B_dup2266		L1MdA_VII_dup8158	ORR1A1_dup1013
ID_B1_dup84556		B3_dup128965	L1MdGf_I_dup1538
L1MdA_I_dup1282		Tigger17a_dup768	L1M3e_dup190
RLTR48A_dup473		MLT1F-int_dup171	L1MCa_dup2443
MMERVK10C-int_dup2540		RSINE1_dup65540	B1_Mus1_dup89021
L1MdGf_II_dup5594		URR1B_dup10606	MIRb_dup26371
L1MdA_II_dup3255		Tigger5b_Glire_dup1257	B4A_dup10814
Lx7_dup3303		MTD_dup46245	B3A_dup80748
B4_dup56726		RMER1B_dup6160	B1F_dup33607
UCON26_dup97		URR1B_dup2643	L1MdTf_I_dup941
RLTR17B_Mm_dup54800		PB1D7_dup20068	MT2_Mm_dup2033
L1MdA_II_dup2681		PB1D7_dup22152	B2_Mm1a_dup6530
L1MdA_I_dup4348		X12_LINE_dup144	MLT1F1_dup839
L1Lx_III_dup13283		Lx9_dup3768	L1MdF_IV_dup11186
B3A_dup4632		B3A_dup70255	RSINE1_dup60116
LTRIS_Mus_dup243		MRLTR33_dup240	B3A_dup60725
L1MdA_III_dup2220		B4_dup40657	RLTR13E_dup262
L1MdGf_II_dup258		B1_Mm_dup16252	RMER15-int_dup343
MER31B_dup366		B4A_dup98040	ORR1B2_dup7495
Tigger2b_dup149		MLTR25A_dup1583	RLTR4_MM-int_dup817
MERVL-int_dup1640		ID_B1_dup607	L1MdF_I_dup4640
RLTR24_dup421		B3_dup66046	L1MdA_II_dup2847
L1MdGf_II_dup6347		L1M4b_dup1601	RLTR17B_Mm_dup33404
RMER17A2_dup426		MurSatRep1_dup2698	Lx10_dup1553
B4A_dup14798		L1MdTf_III_dup209	MurSatRep1_dup1571
L1MdF_I_dup3998		ORR1D1_dup22883	B4A_dup90867
MurSatRep1_dup2798		MTB_dup7222	ERVB4_1B-I_MM_dup1408
Lx10_dup10368		MERVL_2A-int_dup1683	RLTR11A2_dup2187
B1F2_dup18090		Lx2_dup17853	B1_Mus1_dup7856
EUTREP15_dup7		MER2_dup10135	B4_dup28864
B2_Mm1a_dup926		ORR1C1_dup8454	L1MdA_I_dup4089
MERVL-int_dup235		Lx8_dup42551	L1MdTf_I_dup1792
Lx_dup10589		LTR41B_dup115	Lx8_dup6900
B2_Mm2_dup51692		MurSatRep1_dup2392	Lx7_dup15722
L1MdGf_I_dup2018		MTD_dup20311	B3_dup26942
L1MdA_I_dup3556		L1MdFanc_II_dup6916	MTD_dup25327
ORR1A1-int_dup1085		RLTR4_MM-int_dup3238	B2_Mm2_dup59864
RLTR4_Mm_dup166		B2_Mm2_dup4660	MurSatRep1_dup2832
B3_dup130484		RMER6A_dup760	L1ME2_dup1544
RLTR20B1_dup170		MurSatRep1_dup601	B1F1_dup7051
ERVB4_2-I_MM_dup30		L1MdF_I_dup3812	MTE2a_dup7805
MTD_dup19088		Lx5c_dup13863	B3_dup63398
MTD_dup11321		MER92B_dup160	L1Lx_IV_dup2001
RLTR4_Mm_dup126		Lx2A1_dup1273	RSINE1_dup49754
B1F2_dup10655		L1MdGf_II_dup2880	L1MdA_I_dup472
B1_Mus2_dup36181		B4_dup52520	L1MdA_I_dup2249
IAPEz-int_dup3769		ETnERV-int_dup190	Tigger14a_dup38
RSINE1_dup74244		Lx5b_dup6744	B4_dup43421
L1MdA_III_dup4951		Lx8b_dup5655	L1MdA_VI_dup3487
L1MC1_dup3381		RMER12C_dup4222	ID_B1_dup100148
MIRb_dup7079		ORR1B1_dup8241	RLTR4_MM-int_dup9690
L1MdA_III_dup3360		L1MdF_I_dup3997	L1M4c_dup172
LTR72_RN_dup556		PB1D11_dup5020	L1MB3_dup1530
L1MdF_III_dup4184		B3_dup93451	RMER15_dup1282
IAPEz-int_dup6075		ORR1B2_dup3572	MERV1_I_dup918
B1_Mus1_dup58821		MTD_dup12705	MTA_Mm_dup2305
B1_Mur2_dup14436		L1Lx_I_dup3	PB1D10_dup3179
L3_dup136		L2_dup14629	GSAT_MM_dup42
L1MdA_II_dup3132		L1Lx_IV_dup9504	L1_Rod_dup503
MMERVK10C-int_dup2939		MER5B_dup4232	URR1B_dup6202
MLTR25A_dup475		L1_Mur3_dup11335	MIRc_dup19483
RLTR10_dup548		L1_Mur2_dup6610	L1MdMus_I_dup1796
L1MdMus_I_dup775		B4A_dup81281	L1MdA_II_dup2136
L1MdA_II_dup1822		ID_B1_dup69391	L1Lx_III_dup172
RMER1A_dup2701		L1MA5_dup533	MurSatRep1_dup2040
Tigger19a_dup589		L1M2_dup3393	B1F_dup19896
L1MdGf_II_dup2174		Lx3C_dup5514	L1MdA_VII_dup872
RLTR45-int_dup439		MIRb_dup13039	IAPEz-int_dup7402
RLTR18_dup68		URR1A_dup8146	MMTV-int_dup44
LTR16A1_dup479		B2_Mm1a_dup11593	MLT1A_dup2227
RSINE1_dup40811		B4_dup56119	L1MdF_V_dup11673
L1MdA_I_dup2174		MTE2b_dup16114	B3_dup118304
B1_Mm_dup20331		PB1D9_dup21206	ID4_dup2561
L1MdTf_II_dup652		RMER3D-int_dup2370	L1Lx_IV_dup4797
Lx6_dup12089		B1_Mus1_dup22995	URR1B_dup10033
L1Lx_III_dup11818		MLT1-int_dup170	RLTR4_MM-int_dup285
L1MdTf_II_dup2123		MurSatRep1_dup1773	B1_Mus2_dup22927
IAPEz-int_dup5935		L1MA5_dup531	Lx9_dup44823
Lx2B2_dup3282		MLT1F_dup1508	L1MdA_II_dup360
B3_dup5279		B1F_dup36056	L1MdA_V_dup630
PB1D7_dup7895		L2_dup275	MIR3_dup13393
MTE2b_dup291		Lx2B2_dup9212	RMER19A_dup1923
L1MdA_II_dup1960		Lx9_dup36957	ORR1B1-int_dup55648
L1_Mur1_dup1287		Lx5_dup13499	IMPB_01_dup2923
MTA_Mm_dup2260		ORR1A1_dup687	ID_B1_dup92891
Lx8_dup54998		URR1A_dup12979	B1_Mur3_dup3274
B4_dup32306		MIRc_dup19455	MIR3_dup14935
B2_Mm1t_dup9832		B3_dup118304	B2_Mm2_dup45582
hAT-N1_Mam_dup22		B4_dup13570	L1MdFanc_II_dup6563
B3A_dup1303		MER5A_dup6906	Lx5_dup15575
RMER5_dup7162		MLT1A_dup361	L1MdTf_III_dup988
MurSatRep1_dup235		ORR1A3_dup2447	B1_Mus1_dup36867
Tigger17b_dup114		L1MC4_dup4396	RLTR4_MM-int_dup510
PB1D9_dup17033		RLTR11D_dup53	B3_dup10527
L1MdA_II_dup633		L1MdA_VII_dup8127	L1Lx_IV_dup4794
ERVB4_2-I_MM_dup28		MTA_Mm_dup17603	Lx5c_dup16363
PB1D9_dup21768		MurSatRep1_dup2374	RLTR17B_Mm_dup41022
L1MCc_dup247		B4A_dup7182	ORR1B1_dup18493
RLTR17D_Mm_dup984		L1MD2_dup675	B1_Mus1_dup18160
B1_Mus1_dup8608		MLT1O_dup341	L1Lx_IV_dup186
MamRTE1_dup727		ORR1A4_dup2118	RLTR9A_dup41
B1_Mur1_dup13637		RLTR17D_Mm_dup984	L1MdV_I_dup2356
L1MdFanc_I_dup246		MTC_dup13613	MT2A_dup4640
B1F1_dup9686		MIR3_dup2362	Lx9_dup605
B1_Mur2_dup17061		L1MB8_dup3704	L1Lx_III_dup5503
PB1D10_dup6636		Charlie5_dup1640	L1MdTf_I_dup1443
IAPLTR1a_Mm_dup1655		RMER12_dup2569	RLTR4_MM-int_dup10513
Lx5c_dup12355		RMER15_dup1574	B4A_dup24166
Lx3_Mus_dup826		ORR1D2_dup3503	L1MdF_III_dup5149
MIR_dup25941		B1F2_dup18090	L1Lx_II_dup5594
B2_Mm1a_dup12003		MERVK26-int_dup859	Lx8_dup53701
URR1A_dup15844		MTEa_dup8984	RLTR20A4_dup14056
L2a_dup10929		B1_Mur3_dup10996	L1MC4_dup3000
L3b_dup182		B1_Mur4_dup25504	MTA_Mm_dup16502
ID_B1_dup103686		ID4_v_dup14636	L1MdTf_III_dup4177
MERVL-int_dup263		ORR1D1_dup2997	PB1D9_dup2421
Lx9_dup44823		L1MCc_dup174	L1MdGf_I_dup773
B3_dup35952		MamRep564_dup108	B2_Mm1a_dup9937
ORR1F_dup9007		Charlie22a_dup25	B1F_dup17576
L1MdGf_II_dup6255		MTE2b_dup292	RMER16-int_dup1815
L1MdA_VII_dup6502		MIR3_dup9716	RSINE1_dup39331
MTA_Mm_dup6310		PB1D7_dup9644	L1MdA_IV_dup5550
L1MdMus_II_dup5537		B3_dup70111	IAPEy-int_dup61
IAPEz-int_dup646		ORR1B1-int_dup25418	RLTR30D_MM_dup165
ID_B1_dup89728		Lx8_dup30531	B1_Mur4_dup3189
B4A_dup29197		L2b_dup14208	PB1D10_dup51526
B4_dup10605		Lx8b_dup631	L1M2a_dup107
RLTR4_MM-int_dup9262		PB1D7_dup19707	L1MB4_dup2835
L1MdTf_I_dup902		B1_Mm_dup7936	B1_Mur1_dup21577
B3A_dup35529		MurSatRep1_dup580	L1MdF_IV_dup9021
RMER3D-int_dup2370		ORR1G_dup6120	L1MCa_dup2437
ORR1D1_dup22840		Lx3B_dup4874	L1Lx_IV_dup4786
ORR1B1_dup17732		L1M4b_dup1600	B1_Mus2_dup14899
MTEa_dup17124		ORR1B1_dup14618	Lx5_dup16606
UCON14_dup29		RLTR17B_Mm_dup39739	ORR1B1-int_dup329
Lx2B2_dup7178		ERVB7_1-LTR_MM_dup21	B4_dup4838
L1MdTf_III_dup491		IAPLTR2_Mm_dup162	ORR1F_dup7999
L1Lx_II_dup3781		ID4_v_dup2950	RLTR17B_Mm_dup19030
RLTR17B_Mm_dup9310		B3_dup29312	MT2_Mm_dup1140
RLTR17B_Mm_dup35696		L1MEc_dup243	L1MdTf_I_dup1111
L1MdA_VI_dup6768		Lx9_dup40732	L1MdGf_I_dup2935
RLTR40_dup687		B3_dup55797	B1_Mus1_dup94122
B2_Mm1t_dup17148		MER33_dup1526	MERVL_2A-int_dup758
RMER19C_dup2723		ORR1D1_dup19691	L1MdV_III_dup9047
B2_Mm1a_dup641		MIR3_dup689	L1MdTf_I_dup1100
RLTR4_MM-int_dup9988		B1_Mur3_dup5958	L1MdF_IV_dup7492
ID4_dup19999		RMER4B_dup4120	B1_Mus2_dup26811
PB1D11_dup2276		MurSatRep1_dup1915	RSINE1_dup53096
L1MdTf_II_dup2703		Lx8_dup56290	LTRIS4_dup32
Kanga1_dup258		MIRb_dup22598	L1MdF_I_dup2028
Lx8b_dup630		ID_B1_dup63873	B3_dup145923
IAPEz-int_dup5416		MTE2b_dup12790	RLTR8_dup15
Lx6_dup14106		L1MdTf_II_dup3718	L1MdA_I_dup87
Lx3A_dup6248		B3_dup129741	RLTR13D3A_dup100
L1Lx_III_dup1149		ORR1C1_dup8617	B1_Mur3_dup10905
RMER19C_dup1278		L1MdF_IV_dup17939	IAPLTR2b_dup390
MLT1-int_dup170		X8_LINE_dup18	PB1D10_dup20320
B3_dup141942		L3_dup135	MIR3_dup11270
B1_Mus1_dup32656		B1F1_dup7051	B3_dup1523
B1_Mur2_dup18581		L1MdF_I_dup366	IAPEz-int_dup4686
Lx2_dup2655		B3_dup75236	L1M2_dup13855
L1MdF_V_dup9187		L1M5_dup12069	MIR1_Amn_dup3929
L1MdA_III_dup7593		B1F1_dup3476	B3_dup25654
L1MdTf_II_dup1817		MurSatRep1_dup919	MERVL-int_dup199
PB1_dup3771		ORR1E_dup1015	B1F_dup42524
B3A_dup90453		B1_Mus2_dup55382	MLT1D_dup2541
ID4_dup7193		MurSatRep1_dup2376	B1_Mm_dup20816
L1MdA_III_dup2617		MER58A_dup2931	MTD_dup5045
B2_Mm2_dup44375		B1_Mus2_dup58031	L3_dup8544
L1MdGf_II_dup7200		B1F2_dup8825	RCHARR1_dup606
ID4_dup15668		L1MdA_I_dup3949	Tigger10_dup248
IAPLTR2_Mm_dup162		Charlie1_dup647	L1MdA_II_dup4290
B1F_dup26668		MER5A_dup8131	MIR3_dup4006
RMER13A2_dup227		MurSatRep1_dup2754	L1MdA_II_dup1249
RSINE1_dup44037		MTC_dup27043	L1MA6_dup906
L1MdA_VI_dup2511		Lx5c_dup1017	ORR1B1_dup16415
L1MdA_III_dup6250		RLTR20A4_dup5569	MTB_dup7032
L1M5_dup12919		B3_dup113375	L1MdF_III_dup5152
IAPLTR4_dup23		RLTR40_dup802	L1MdTf_III_dup2024
MLT1A0_dup3304		B1F_dup488	L1MdF_III_dup1753
L1MdA_III_dup6377		B1_Mus1_dup92953	MTD_dup50491
Lx8b_dup16724		X6B_LINE_dup473	B2_Mm1a_dup10725
L1MdV_I_dup7868		L1MdGf_II_dup1811	ORR1D1_dup3009
ERVB7_1-LTR_MM_dup21		B2_Mm1t_dup23761	L1MdFanc_I_dup247
ORR1B1_dup5741		ORR1B1-int_dup63596	L1Lx_I_dup8299
B4_dup40484		RSINE1_dup105722	L1MC4_dup666
PB1D7_dup14931		RMER17C2_dup57	IAPEY4_I_dup173
B4A_dup26825		MTC_dup12627	RMER5_dup2281
IAPEz-int_dup2149		RLTR44-int_dup289	B4_dup4878
Lx8b_dup631		Lx8b_dup26571	ID_B1_dup69391
ORR1D2_dup15984		L1MdV_III_dup5421	RSINE1_dup100956
IMPB_01_dup22411		RSINE1_dup43298	MIR_dup4786
RLTR16_dup139		RLTR23_dup1373	IAPEz-int_dup3344
L1_Mur2_dup3515		PB1D10_dup60915	Lx10_dup10875
L1MdMus_II_dup3332		MIRb_dup10982	L1MdGf_I_dup298
B3_dup90902		B4A_dup98038	MurSatRep1_dup472
Lx9_dup33897		MTD_dup53840	MERV1_LTR_dup575
MTEa_dup3683		Lx2B_dup2772	IAP-d-int_dup1038
MT2A_dup2273		L1MdFanc_I_dup9299	AmnSINE1_dup228
MTD_dup26160		L1MdF_IV_dup14179	L1MdTf_III_dup2193
L1MA9_dup631		MIRb_dup1485	Lx5_dup12595
IAPLTR1_Mm_dup1145		MTE2b_dup10882	RLTR47_dup190
PB1D10_dup10042		MIR3_dup673	Lx2B2_dup874
PB1D10_dup23343		PB1D9_dup28769	Lx7_dup2773
MTD_dup42024		RSINE1_dup53074	RSINE1_dup17652
ORR1F_dup10896		L1MA7_dup1692	L1MdA_I_dup3354
L1MdGf_I_dup2473		L1Lx_I_dup8	ID_B1_dup22127
B3_dup118304		RLTR19-int_dup982	ID_B1_dup90150
B2_Mm1t_dup9082		L1MdA_II_dup4408	B1_Mus2_dup36183
PB1D10_dup55184		RLTR11A2_dup2173	RLTR14_dup1601
RLTR35B_MM_dup359		ORR1D2_dup5008	LTRIS2_dup1293
Lx5b_dup5888		MurSatRep1_dup527	IAPLTR2a2_Mm_dup1369
L1MB3_dup4931		B1_Mur1_dup31229	MamRTE1_dup3918
MER5A_dup7505		RLTR24_dup567	MERVL-int_dup1989
L1MdA_III_dup825		RLTR4_MM-int_dup3239	L1MdGf_II_dup4187
RLTR20A_dup278		L2_dup9203	RMER13A1_dup590
Lx8_dup49744		L1MD_dup4070	L1MdA_IV_dup4460
L1MdFanc_II_dup9980		B3_dup26942	Lx8_dup49190
MT2A_dup1605		L1MA9_dup3357	PB1D10_dup20319
IAPEz-int_dup4592		ID_B1_dup35700	PB1D10_dup41060
B2_Mm2_dup11454		L1MdF_IV_dup17117	L1MdGf_I_dup2002
RLTR6_Mm_dup131		RLTR20A4_dup8260	MT2_Mm_dup2353
L1M5_dup542		Mam_R4_dup76	ORR1F_dup3131
L1MdA_VII_dup1179		ERVL-B4-int_dup21	L1MA9_dup390
MT2B2_dup280		MMSAT4_dup588	L1MdF_I_dup6526
RLTR20A4_dup2041		PB1D10_dup27811	MTD_dup20525
B1_Mur1_dup22384		B3A_dup89564	RLTR20A4_dup5264
IAPEz-int_dup6679		ID4_v_dup9737	L1MdTf_II_dup3338
L1Lx_IV_dup11427		L1ME1_dup428	MurSatRep1_dup111
MT2A_dup1838		ID_B1_dup73150	ORR1A4_dup2740
L1MdA_III_dup5130		B3A_dup88557	ID_B1_dup50178
URR1B_dup4454		B2_Mm2_dup1067	Lx7_dup30526
RLTR13B3_dup32		Charlie2a_dup566	B2_Mm1t_dup8466
IAPEz-int_dup3931		MIRb_dup40572	ORR1F_dup19004
Lx2B2_dup1541		Lx8b_dup23545	B1_Mur2_dup6088
L1MdF_IV_dup1263		ORR1D1_dup11665	Lx8b_dup26718
ORR1B1_dup5001		MurSatRep1_dup721	RLTR10-int_dup1743
L3_dup4833		MMSAT4_dup411	B3_dup102916
MTA_Mm_dup13445		X9b_DNA_dup94	L1MdTf_II_dup2448
MurSatRep1_dup2687		Lx6_dup18435	L1MdTf_III_dup665
L1MdGf_I_dup665		MTD_dup53845	L1MdF_V_dup5562
MLT1E1_dup342		L1MdMus_I_dup10969	ID4_v_dup9819
Lx8b_dup24437		MIRb_dup14607	MIR_dup16234
B1_Mus1_dup69257		B2_Mm2_dup18937	MLT1B_dup4388
B2_Mm2_dup10704		Lx_dup3381	L1Lx_I_dup14760
B4A_dup95650		ORR1A1-int_dup228	L1MB1_dup168
IAPEz-int_dup5238		PB1D9_dup17371	MIRb_dup14607
B3A_dup59600		L1MdA_I_dup4348	ORR1C1_dup440
ORR1D1_dup6212		B3_dup144872	L1MdA_II_dup5259
PB1D7_dup10309		MLT1J1_dup7	RLTR14-int_dup821
L1MdTf_I_dup2331		Lx7_dup23543	ORR1E_dup4990
MT2A_dup9131		MT2_Mm_dup73	IAPEz-int_dup5782
L1MdGf_II_dup126		B4A_dup63888	RSINE1_dup106642
IAPEz-int_dup2557		ID_B1_dup41635	L1MdF_IV_dup15978
L1MdV_II_dup558		ORR1D2_dup12721	L1MdA_III_dup5619
L1MdTf_II_dup2968		MYSERV6-int_dup1319	B1_Mus2_dup16702
ORR1A3-int_dup8416		MIR_dup17356	B3A_dup78351
L1_Mur1_dup4850		RLTR17B_Mm_dup59350	L1MdMus_I_dup4703
Lx8_dup42699		URR1B_dup4094	RLTR1A2_MM_dup187
MT2A_dup2199		ID_B1_dup43830	L1Lx_III_dup11945
Tigger14a_dup221		B4A_dup37833	L1MdF_IV_dup5538
Lx5b_dup3045		EUTREP2_dup143	ID_B1_dup5723
MTC_dup26920		ID_B1_dup81984	PB1D7_dup23823
B2_Mm1a_dup17942		MTEa_dup9694	Lx4B_dup1134
B2_Mm1t_dup15822		ORR1B1-int_dup64044	MYSERV6-int_dup1747
L1MdTf_III_dup417		RLTR31B2_dup589	PB1D10_dup15391
RSINE1_dup87696		B1_Mur2_dup14436	IAPEz-int_dup6269
RMER4B_dup2774		L1Lx_III_dup13285	RLTR10-int_dup1239
PB1D10_dup10616		MMERVK9E_I_dup466	L1M2_dup5407
B1_Mm_dup38629		MurSatRep1_dup932	RLTR20A4_dup3060
B1_Mur1_dup22064		B3_dup123399	L1Lx_II_dup5592
PB1D9_dup28396		B2_Mm2_dup45593	MTA_Mm_dup7438
L1MdGf_I_dup1484		B1_Mus1_dup87797	PB1D9_dup18298
Lx8_dup20144		B4A_dup91049	Lx7_dup376
IAPLTR1_Mm_dup809		ID_B1_dup89349	L1MdTf_I_dup1627
RLTR40_dup802		MurSatRep1_dup922	B1_Mur1_dup22066
L1MdF_III_dup5151		PB1D9_dup16300	ORR1B1-int_dup9831
B4A_dup1286		B3A_dup89573	RLTR16_dup139
B2_Mm1a_dup17962		B3A_dup90215	IAPEz-int_dup7071
L1MdTf_III_dup3561		RSINE1_dup18891	L1MdA_II_dup2971
L1MdA_II_dup146		RMER3D-int_dup1756	B1F2_dup17802
L1MdTf_I_dup2310		L1M4_dup3711	L1M3d_dup229
MERVL-int_dup1702		RLTR11A2_dup1443	L2c_dup964
RLTR18-int_dup80		L1MdF_IV_dup8182	PB1D11_dup14269
RCHARR1_dup3535		LTR16C_dup1095	L1M2_dup5705
L1MdTf_I_dup1803		Lx8b_dup23544	L1MdA_I_dup140
URR1A_dup7834		ID_B1_dup9676	ORR1E_dup2941
B3_dup70111		IAPEz-int_dup6601	MIR3_dup7773
Lx9_dup27871		MER5A_dup8520	ORR1B1-int_dup3419
MIR_dup30987		MIRb_dup17876	Lx7_dup1576
B3_dup128617		L1MdA_VI_dup2511	B2_Mm2_dup10451
B1_Mus1_dup85427		RLTR17B_Mm_dup48790	L1MdV_III_dup3787
B4_dup61512		ORR1D1_dup4917	L1Lx_IV_dup4790
L1_Mur3_dup16558		L1MdGf_I_dup605	ORR1B1-int_dup58762
L1MdA_I_dup2689		Lx4A_dup8687	L1MdTf_III_dup259
B3_dup35298		Lx5_dup12809	MamTip2_dup163
Lx6_dup8280		B3A_dup60725	RLTR17B_Mm_dup22245
B4A_dup94147		L1MdF_I_dup4001	B1_Mm_dup33283
L1MdA_II_dup3786		IAPEY4_I_dup113	MIRb_dup22883
B1F2_dup1885		B1F_dup36055	L1MdTf_III_dup3538
RLTR12E_dup105		MurSatRep1_dup1092	MER34_dup460
URR1B_dup4094		B3_dup75045	ORR1A2_dup4988
RLTR11A2_dup2173		RLTR11A2_dup173	PB1D7_dup8491
RMER5_dup4507		Charlie1_dup646	PB1D10_dup36130
L1MdTf_III_dup1954		L1MdMus_I_dup775	PB1D9_dup28236
MTA_Mm_dup17483		L2a_dup2675	L1MdA_II_dup334
B2_Mm2_dup21448		PB1_dup9198	L2d_dup1164
RLTR20A4_dup912		RLTR17B_Mm_dup48791	Lx8_dup54985
L1MdTf_II_dup1848		MTE2b_dup11405	L1MB3_dup224
RLTR14_RN_dup638		RLTR15_dup1202	IAPEz-int_dup1326
L1MdGf_I_dup3023		RMER1C_dup1804	LTR16C_dup1095
RLTR44-int_dup490		L1MdTf_III_dup1497	ORR1B1_dup19995
MLTR31F_MM_dup232		L1_Mur3_dup15932	MIR_dup14533
Lx9_dup40732		B1_Mus1_dup30085	ID4_v_dup4461
L1M5_dup13236		L2_dup1413	B3_dup54596
IAPEz-int_dup2046		RLTR4_MM-int_dup3240	IAPEY2_LTR_dup472
IAPLTR1_Mm_dup1341		ORR1B1-int_dup20235	Lx4A_dup1539
Lx8_dup12885		ORR1A4_dup4440	L2a_dup6388
B1_Mus2_dup37601		RLTR16_dup1218	OldhAT1_dup2775
L1MdF_II_dup1382		L1MdGf_II_dup2578	B3_dup123115
ORR1E_dup24212		Lx7_dup12486	L1MdA_III_dup7030
L1MEc_dup1236		ORR1C2_dup11535	L1MdTf_III_dup4182
MTD_dup22244		X8_LINE_dup45	Lx8b_dup22109
ORR1C2_dup637		B1F_dup19423	B2_Mm1a_dup14961
B3_dup4526		L1MC5_dup531	B2_Mm1a_dup4584
B3A_dup6722		B3A_dup75112	ORR1D1_dup22624
L1MdA_III_dup2247		IMPB_01_dup20409	RLTR20C2_MM_dup3946
MTE2b_dup292		Tigger15a_dup284	RMER1C_dup6059
MTD_dup7660		HAL1ME_dup295	L1MdV_III_dup11373
MMERGLN_LTR_dup104		IAPEz-int_dup2955	L1MdGf_II_dup6326
L1MdFanc_II_dup9983		Lx8_dup8943	B4A_dup40231
IAPEz-int_dup6227		L1MdTf_II_dup3390	RLTR4_MM-int_dup6266
L1MdA_I_dup3813		ORR1A4_dup3505	IAPLTR2_Mm_dup1549
B1_Mus1_dup47614		RLTR11A2_dup2165	B4A_dup43397
MMERVK9C_I_dup375		L1MdN_I_dup1767	B3A_dup63724
Tigger19b_dup268		Tigger19b_dup336	L3_dup7486
IAPLTR1_Mm_dup1098		MER2_dup4043	RMER19A_dup1876
L1MdFanc_I_dup8162		MLT1E3_dup354	MTD_dup28629
PB1D7_dup6059		B1_Mus1_dup74752	RLTR10-int_dup1876
B2_Mm2_dup14728		Tigger19a_dup5	MTEb_dup9997
IMPB_01_dup2112		RSINE1_dup67842
IAPEz-int_dup6058		IAPEz-int_dup2360
X8_LINE_dup45		Lx7_dup15408
ID_B1_dup38893		Lx2B_dup2592
RMER1A_dup1183		PB1D9_dup1314
L1MC1_dup1223		IAPEz-int_dup5682
B1F2_dup15915		Lx8_dup32040
RLTR10-int_dup443		L1MB8_dup4524
MIRb_dup26606		L1MdFanc_II_dup5220
L1MdTf_II_dup1223		MER57C2_dup398
L1MdA_III_dup2131		Lx7_dup32646
RMER12C_dup9813		LTRIS_Mus_dup243
MYSERV-int_dup743		ORR1D1_dup1225
L2d_dup1631		Lx2_dup4006
L1MdF_IV_dup17495		B2_Mm2_dup51662
PB1D9_dup4861		L1ME2z_dup22
B2_Mm2_dup69222		B3_dup92865
B1F2_dup9331		MER135_dup254
Lx8_dup8226		L1MdA_II_dup4030
RLTR16_dup634		B1F_dup16547
Tigger19a_dup5		L1MdA_I_dup1830
L1MdA_III_dup3751		L1MdA_II_dup429
L2a_dup14831		MIRb_dup30518
L1Lx_I_dup6519		RSINE1_dup39175
L1MdA_VII_dup3229		L1_Mur1_dup164
L1MdA_III_dup4406		B1_Mur1_dup13498
RSINE1_dup85688		MIRc_dup15506
RLTR4_Mm_dup90		B1F1_dup6381
RSINE1_dup1281		RSINE1_dup49526
B3_dup78637		B3_dup21126
B3_dup99514		Lx8_dup1133
L1M2_dup2096		URR1A_dup19766
MERVL_2A-int_dup2181		Lx6_dup14106
L1MdTf_II_dup3135		ORR1D1_dup15380
RMER3D-int_dup177		ORR1B2_dup2216
Lx3_Mus_dup239		RLTR13D3_dup80
L1MA6_dup4995		B1F_dup42037
Lx2B2_dup202		RLTR17B_Mm_dup59068
L1MdA_II_dup1911		IAPLTR1_Mm_dup809
L1Lx_III_dup5503		B3_dup66401
IAPEz-int_dup7198		B4_dup32055
L1MA4_dup3983		RLTR11A_dup2185
MMVL30-int_dup757		RLTR24_dup84
L1M4_dup5057		ORR1C1_dup7153
MIRb_dup35344		B1_Mur1_dup22064
MTB_dup4886		B3A_dup1599
IAPEz-int_dup3895		B3_dup84756
MIR_dup13839		RLTR17B_Mm_dup3311
RSINE1_dup1282		ORR1F_dup1066
B4A_dup1284		L1MdF_IV_dup17933
B4A_dup18667		B3A_dup83661
L1_Mur1_dup164		Lx8_dup54985
Lx6_dup820		Lx7_dup24732
L1M2_dup3393		L1MdTf_III_dup3449
PB1_dup608		Lx2B_dup4817
L1MA9_dup3357		ETnERV2-int_dup845
IAPLTR2_Mm_dup782		B2_Mm1a_dup15738
Lx8_dup22517		IAPLTR2_Mm_dup161
ID_B1_dup19176		B4A_dup38143
RMER19B_dup601		L1MdA_I_dup1900
B4_dup727		B1F_dup20208
B2_Mm2_dup76026		Penelope1_Vert_dup24
L1M2_dup5153		B3A_dup46791
Lx8_dup24845		L1MdTf_II_dup2604
ORR1A3-int_dup6036		ID_B1_dup68702
L1MA5_dup531		MER34A_dup573
Charlie1_dup646		L1MdF_V_dup10221
Lx5c_dup384		Lx2B2_dup5398
B3_dup8851		RLTR14_dup1601
ID_B1_dup50178		B1F2_dup12375
RLTR13D3_dup80		RSINE1_dup19204
MER2_dup835		B1_Mur3_dup25311
L1MdA_III_dup8365		RLTR4_MM-int_dup510
L1MdV_I_dup7867		RMER6C_dup3767
ID_B1_dup58052		PB1D7_dup906
ID_B1_dup29223		MTA_Mm_dup4517
L1MdF_IV_dup13213		B1_Mus2_dup48385
RLTR10_dup1693		L2a_dup21774
B3A_dup87769		RLTR13A3_dup87
L1MdA_I_dup4126		RMER15_dup15942
MERVL_2A-int_dup3000		MIR_dup30978
L1MdTf_II_dup1380		B3_dup137383
ORR1D2_dup329		MYSERV-int_dup743
RLTR13A_dup69		L1MdA_III_dup4986
MTA_Mm_dup14229		Lx8_dup49336
B1F_dup39446		PB1_dup11467
RLTR17B_Mm_dup35809		L1MC1_dup4820
B2_Mm2_dup42040		B2_Mm2_dup18939
Lx2B_dup1192		L1MdF_IV_dup13882
MTC_dup17117		Charlie1a_dup2499
B4A_dup14797		B1_Mur2_dup11349
L1MdF_IV_dup5548		PB1D11_dup10303
ORR1A2_dup11256		Lx8b_dup26578
MTD_dup19090		ORR1G_dup8286
L1MdA_III_dup6807		B3_dup71707
Lx5c_dup2543		RLTR13B3_dup32
B1F2_dup124		B1F_dup16362
B1_Mur4_dup19836		ID4_v_dup12504
Lx5c_dup9019		ID_B1_dup106107
L1ME2z_dup692		B1_Mm_dup41474
B2_Mm2_dup63415		B3_dup144867
Lx9_dup16618		B1F2_dup11582
B1_Mm_dup25575		L1Lx_I_dup6519
RMER19B_dup3951		B4A_dup28557
L1MdF_III_dup12617		RMER2_dup2286
MIRb_dup37079		L1Lx_III_dup129
Lx9_dup27866		ID_B1_dup19756
RLTR18-int_dup78		IAPEz-int_dup5600
B4_dup6459		L1MdF_V_dup5561
Penelope1_Vert_dup1092		MTC_dup1793
IAPLTR2_Mm_dup1533		B3_dup128007
Lx8_dup19499		B1_Mur1_dup40133
MTEb_dup10097		L1MdTf_III_dup4217
MIRb_dup1982		IAPEz-int_dup1706
B2_Mm2_dup6905		ORR1E_dup8680
RLTR4_Mm_dup34		L1Lx_III_dup13283
B4A_dup91047		Lx6_dup1289
L3_dup137		B1_Mur1_dup10330
B1_Mus2_dup38927		B1F1_dup6664
L1MA6_dup4998		ID4_v_dup4541
B1_Mm_dup5637		Lx4A_dup1540
B2_Mm2_dup55783		Zaphod2_dup11
B4A_dup98726		PB1D7_dup7919
ETnERV2-int_dup574		RMER12B_dup210
L1MdA_II_dup2673		Kanga1_dup258
L1MB7_dup2599		L2a_dup9693
L1MC1_dup4820		ID4_v_dup16450
B1_Mur4_dup24565		ORR1D1_dup22622
Lx7_dup22098		ID_dup1272
URR1A_dup1807		MTB_Mm_dup5658
L2_dup14838		PB1D10_dup10042
L1MdA_I_dup2127		L1MdV_III_dup4958
Lx9_dup3768		L2a_dup21775
B2_Mm2_dup22206		ORR1D2_dup11268
Tigger19a_dup239		RLTR17B_Mm_dup10983
Lx7_dup22095		L1MdF_III_dup4812
L1MdGf_II_dup953		MLTR11B_dup2266
IAPEz-int_dup3910		IAPLTR3-int_dup1733
ORR1B1_dup8241		MLT2B3_dup683
ORR1A0_dup526		RMER15_dup5915
B2_Mm2_dup18939		MurSatRep1_dup1230
Lx_dup719		Lx2B2_dup1670
MTA_Mm_dup7819		L2c_dup9245
B3_dup21974		MTC-int_dup617
L1MdTf_I_dup175		L3b_dup2313
B2_Mm2_dup21438		B4_dup11525
RLTR17B_Mm_dup24465		ORR1B1-int_dup1776
L1MdA_I_dup4087		RLTR17B_Mm_dup58392
RLTR4_MM-int_dup10070		Lx8_dup45194
B3_dup52707		MT2B1_dup2257
Lx8_dup16831		ID_B1_dup15550
L1MdTf_III_dup4509		PB1D9_dup14077
B3_dup72653		MurSatRep1_dup1226
IAPEz-int_dup6746		ORR1D2_dup1328
B2_Mm2_dup10190		Lx_dup10588
ID_B1_dup7513		Lx7_dup3303
ORR1B1-int_dup60991		ORR1A2_dup17029
MERVL-int_dup1810		MTC_dup19236
L1MdA_II_dup3474		PB1D10_dup58113
LTRIS3_dup24		B2_Mm2_dup51692
L1MdTf_III_dup1936		Charlie26a_dup81
PB1D11_dup3781		L1MdF_IV_dup19812
B3A_dup73740		Lx2B2_dup202
L1_Mur3_dup10446		B3_dup86085
OldhAT1_dup258		MamRTE1_dup3293
MTD_dup25470		RSINE1_dup1281
L1MB8_dup577		ID4_v_dup6385
B3A_dup17471		B1_Mus1_dup65500
ORR1B1-int_dup25104		RLTR34D_MM_dup30
B4A_dup40681		B1F1_dup7723
L1MdV_III_dup284		RLTRETN_Mm_dup889
L1_Mur2_dup19222		MIRc_dup3586
L1MdTf_III_dup4322		B4A_dup44188
MERVL-int_dup380		L1MCa_dup2605
PB1_dup5798		Tigger19b_dup573
IAPEz-int_dup1001		MurSatRep1_dup2422
L1MdF_V_dup10222		MIRb_dup20213
MLT1E3_dup354		MTE2b_dup13177
PB1D10_dup42236		L1Lx_I_dup12261
B1_Mus2_dup38230		ORR1A2_dup13935
L1MdA_III_dup4696		B3A_dup70195
B2_Mm2_dup3326		UCON4_dup94
RLTR4_MM-int_dup2308		Lx8_dup8539
MurSatRep1_dup1217		L1MdA_VII_dup8876
L1Lx_III_dup13285		L2a_dup14831
ERVB4_1B-I_MM_dup649		RSINE1_dup107914
RLTR10-int_dup1716		Eutr2B_dup73
B3A_dup46791		L1ME3E_dup157
Lx7_dup30099		ID_B1_dup48112
B4_dup1406		L1_Mur2_dup19487
B1_Mus1_dup9272		X8_LINE_dup112
L1MdA_I_dup3641		B1F_dup42041
RLTR40_dup202		L1MdGf_II_dup6713
L1MdTf_II_dup1993		B1_Mur3_dup30151
B1_Mur1_dup21575		B3_dup7535
RMER17B_dup191		Lx3B_dup4877
IAPEz-int_dup5306		B3A_dup59600
MTA_Mm_dup12363		L1MdA_III_dup4696
B1F1_dup4646		L2b_dup13062
L1MdTf_III_dup1323		Lx7_dup25962
L1MC5_dup517		L1MD_dup4128
MTD_dup27779		B1_Mur2_dup16445
Lx8b_dup14404		MurSatRep1_dup2692
L1MdA_I_dup2815		ORR1B1-int_dup2932
MTE2a_dup13942		B2_Mm2_dup83837
Lx4A_dup6963		PB1D10_dup21381
B3_dup18154		MIRb_dup25464
MTA_Mm_dup5437		RLTR10D2_dup126
PB1D10_dup10458		L1MEg_dup1627
IAPEz-int_dup877		MIR1_Amn_dup2927
MLT2F_dup2		L2c_dup10207
MIRb_dup30497		L1MdMus_II_dup5537
MIR_dup23614		MMERGLN_LTR_dup207
RLTR19-int_dup982		L2_dup278
L1MdTf_I_dup2226		B4A_dup50783
Lx8_dup35274		Lx_dup11488
L1Lx_IV_dup9504		L2a_dup19862
AmnSINE1_dup230		L1MdV_II_dup559
RLTR4_MM-int_dup11073		PB1D10_dup10458
ORR1A2_dup1185		L1MD2_dup490
MIRb_dup21705		L1MdTf_III_dup860
MIRb_dup3066		L1Lx_III_dup12137
B1_Mus1_dup22737		RLTR4_MM-int_dup4188
MT2B2_dup610		L1MA5_dup3368
MT2_Mm_dup972		RCHARR1_dup6689
RLTR22_Mus_dup1126		B3_dup8851
LTR82A_dup121		MTD_dup42024
LTR41B_dup115		Lx2_dup1429
ID4_dup2482		MTA_Mm_dup12320
B1F1_dup3965		IAPEz-int_dup4592
L1MdF_IV_dup3918		MER20_dup4864
RLTR30B_MM_dup157		L1Lx_IV_dup1773
B1_Mur3_dup12697		Lx8_dup56292
RSINE1_dup61082		ID4_dup4004
MTC_dup2732		B4A_dup17329
ID4_dup15166		ORR1D2_dup2667
RMER6C_dup1253		L1MB4_dup2835
L1MdA_VII_dup176		B1_Mus1_dup34854
ID_B1_dup67822		B1_Mur1_dup4619
MurSatRep1_dup2539		MER74B_dup285
B1_Mur3_dup25803		RLTR41A2_dup310
L1MdA_III_dup3416		RLTR16B_MM_dup1075
MurSatRep1_dup2428		RSINE1_dup30877
IAPEz-int_dup513		L3_dup8123
Lx8_dup1128		Lx_dup13326
MTD_dup34755		MTB_Mm_dup3327
L1MdTf_I_dup664		B3A_dup90453
PB1D10_dup10100		RSINE1_dup23218
B1_Mm_dup10348		L1MdF_IV_dup7895
B3_dup5233		RSINE1_dup89386
IAPEz-int_dup3374		MIR3_dup13655
IAPEz-int_dup385		B4A_dup20962
MMERVK10D3_I_dup843		MLTR31A_MM_dup43
RSINE1_dup22642		L2a_dup20031
B3A_dup70255		Lx9_dup32673
B2_Mm2_dup37055		L1MdTf_II_dup1487
B3A_dup60107		L1MdA_I_dup2273
L1MdGf_II_dup2608		L1M4b_dup1605
MTA_Mm_dup7058		L1_Rod_dup11643
RLTR17B_Mm_dup48790		L1MdF_IV_dup1263
L1M4c_dup173		ORR1G_dup6167
RMER15_dup15676		B3_dup78649
L1MdF_I_dup226		MurSatRep1_dup2635
L1MdTf_III_dup2002		IAPEz-int_dup876
RMER17C_dup7		PB1D10_dup60529
ORR1A1_dup4535		L1MdV_III_dup11373
PB1D11_dup10613		MMERVK9C_I_dup415
L1MdA_I_dup680		B2_Mm2_dup74802
ORR1A2_dup7508		B2_Mm2_dup60432
ORR1D2_dup1328		RSINE1_dup99651
B1F1_dup6380		L1MdTf_III_dup3934
MIR_dup26381		B3_dup23522
Lx2B2_dup2493		PB1D7_dup1252
L1MdTf_III_dup1774		L1MEg_dup183
MT2_Mm_dup822		Lx8_dup14149
Lx9_dup7072		B3A_dup78782
B2_Mm2_dup8116		MER33_dup176
L1MdN_I_dup1700		L2b_dup128
B2_Mm2_dup41222		B3_dup23910
BGLII_B_dup281		L1MA7_dup3088
RMER15_dup12836		RLTR4_MM-int_dup9916
Lx9_dup38873		RLTR51A_Mm_dup1563
L1MdF_IV_dup6844		L3_dup7486
L1MdF_V_dup10221		B1_Mur1_dup33245
B4A_dup77475		RMER4B_dup4167
L1MdF_IV_dup18094		RMER15_dup16238
Lx9_dup3767		MMERVK10D3_I_dup864
MurSatRep1_dup947		Lx_dup15933
L1MdTf_III_dup3467		B2_Mm1a_dup2891
B3_dup77529		B1_Mus2_dup57672
L1Lx_I_dup16785		B1_Mus2_dup68292
B1F2_dup8929		OldhAT1_dup204
RSINE1_dup10928		MLT1B_dup2679
L2_dup11927		L2d_dup446
RLTR6_Mm_dup85		MER63A_dup585
IAPEz-int_dup1122		L3_dup136
ORR1A2_dup10374		MTC_dup22635
PB1D10_dup21381		Lx3B_dup1344
L1MdV_II_dup559		B3A_dup82317
MTA_Mm_dup16236		L1Lx_IV_dup9679
B3_dup23694		B1_Mur4_dup7187
L1MA4_dup110		Lx6_dup2894
B3_dup9968		ID4_dup1330
IAPEz-int_dup2945		MT2B_dup1190
L1MdA_IV_dup4220		B3_dup57934
Lx6_dup822		Lx8b_dup16724
Lx9_dup9505		ID_B1_dup100113
RSINE1_dup104765		L1_Mur2_dup9862
Lx5_dup16432		Lx7_dup826
B2_Mm2_dup79668		PB1D11_dup4437
L1MdGf_I_dup1825		B2_Mm2_dup16817
IAPEz-int_dup7314		B1_Mur1_dup22384
B4_dup13159		MER117_dup391
B1_Mm_dup37451		L1M6B_dup10
B3_dup20082		PB1D11_dup10976
L1MdA_I_dup4317		B1_Mur1_dup13494
IAPEz-int_dup374		B3_dup28816
PB1D10_dup52543		MTD_dup4062
IAPLTR1a_Mm_dup1622		B2_Mm1a_dup12682
RLTR10D2_dup126		L1MdA_I_dup4582
ORR1A2_dup6767		RLTR4_Mm
IAPEY4_I_dup294		Lx8_dup42697
B2_Mm1a_dup9205		Lx8_dup42698
B4A_dup73411		B2_Mm2_dup71835
MLTR25A_dup103		MT2A_dup3389
B3_dup145923		B2_Mm2_dup30649
Lx8_dup3876		Lx5_dup11719
L1MB7_dup2014		IAPEz-int_dup5127
B4_dup60508		X9_LINE_dup32
Arthur1C_dup104		Lx_dup15558
Cheshire_dup21		Charlie5_dup42
Lx5b_dup3351		B3_dup23519
B1_Mur1_dup7257		L1MA5_dup2831
L1MdA_I_dup79		L1MdV_III_dup8974
ID_B1_dup54973		MurSatRep1_dup1090
MTA_Mm_dup9119		L3_dup843
L3_dup7237		Lx8_dup11962
Lx8b_dup633		OldhAT1_dup1713
L1MdGf_II_dup2782		Lx9_dup31018
RLTR44-int_dup289		B3A_dup68943
MLT1A_dup5473		B3A_dup41472
MLT1A_dup4140		L1MdF_III_dup6316
RMER1A_dup1174		L1MB7_dup4020
B4_dup4785		LTR33A_dup162
L1MdF_III_dup12828		MLT1A_dup6408
RCHARR1_dup4064		B3_dup130484
L1MdA_II_dup1601		B3A_dup20601
RLTR18B_dup108		L1MdF_I_dup4000
L1MD3_dup908		RMER12C_dup11167
MuRRS4-int_dup63		MER2_dup4236
L1MdGf_I_dup2011		Lx8_dup54996
MLT1C2_dup91		B4A_dup98037
B3A_dup39833		L1MdV_III_dup284
RLTR11A_dup2605		MER5B_dup2527
B1_Mur1_dup20259		Lx8_dup24845
L1MdF_IV_dup3030		MTEb_dup11914
L1MdTf_I_dup1447		L1Lx_III_dup12136
L1MdA_III_dup4754		URR1A_dup2492
MTA_Mm_dup10518		B3_dup134503
L1MdTf_III_dup1119		MamTip2_dup211
RSINE1_dup101408		URR1A_dup19837
L1MdF_IV_dup4739		B1_Mur1_dup13499
B4A_dup81281		B4A_dup89619
ID_B1_dup100059		IAPEY4_I_dup346
BGLII_dup235		PB1D10_dup45905
B3A_dup80387		Lx9_dup38122
Lx3A_dup8055		Penelope1_Vert_dup868
ORR1A2_dup9179		RMER5_dup3650
PB1D10_dup45905		URR1A_dup19347
B2_Mm2_dup84716		MTD_dup25332
RSINE1_dup35089		Charlie16a_dup114
L1MA9_dup4084		L1MdF_III_dup5538
L1MdFanc_I_dup9317		L1MA6_dup2575
LTR40b_dup550		RLTR17B_Mm_dup9310
L1MdTf_II_dup3485		RLTR31B_Mm_dup10
Penelope1_Vert_dup24		MMSAT4_dup500
L1MdGf_I_dup82		B1_Mur2_dup25814
Lx2B2_dup10464		L1MdF_III_dup5155
Lx10_dup1932		Lx7_dup33916
L1MdV_I_dup10560		L1MdA_VII_dup7976
RSINE1_dup24324		B3_dup123395
B1F_dup6381		Lx9_dup3767
L1MdTf_III_dup139		L1MdV_I_dup3764
L1MdTf_I_dup667		ORR1B1_dup14715
RMER17B_dup385		BGLII_dup2247
L1ME2z_dup22		B1_Mus1_dup32918
L1MdA_V_dup339		B3A_dup13018
MIRc_dup5572		Lx5c_dup1320
RLTR49_dup157		ORR1D1_dup428
B1F2_dup15977		RLTR1B_dup295
RMER5_dup1049		Lx3C_dup109
L1MC5_dup531		PB1D10_dup60528
Lx5b_dup5362		B3_dup122969
MIRc_dup19035		RLTR15_dup1860
L3_dup3812		B4A_dup5263
ID4_v_dup109		B1_Mus2_dup16702
RMER15_dup13171		L3b_dup692
IAPEz-int_dup1024		L3_dup137
L1_Mur3_dup11628		L1MC1_dup4986
L1MdGf_I_dup1006		LTRIS_Mm_dup541
L1MdA_I_dup2275		L1MdGf_II_dup2456
L1Lx_IV_dup6128		B4A_dup22258
IAPLTR1_Mm_dup825		B3_dup818
L1MdFanc_II_dup5926		RSINE1_dup50870
RLTR17B_Mm_dup54799		L1MdTf_II_dup3777
L1M5_dup7874		ERVB4_2-I_MM_dup468
MTA_Mm_dup7849		B3_dup141942
Lx8_dup21806		CR1-12_AMi_dup14
RMER15_dup4766		L1MdTf_II_dup1784
ID_B1_dup89499		Charlie4_dup256
B2_Mm2_dup60415		B3_dup52824
PB1D7_dup20958		MTC_dup9417
L1MdA_VII_dup8877		L1MdGf_I_dup638
MIR3_dup107		Lx10_dup2744
L1MB8_dup1108		L1MdTf_II_dup2511
RLTR34C_MM_dup39		B1F1_dup8486
B1_Mur1_dup6508		ID_dup7208
MIRb_dup26555		B3A_dup89577
B3_dup58061		Lx9_dup41664
Lx_dup11488		B4A_dup11615
LTR40b_dup261		Charlie1a_dup2080
MLT1A0_dup6305		RSINE1_dup76485
L1MdV_II_dup6307		MER46C_dup387
MIRb_dup8068		MTA_Mm_dup14754
MLT1K_dup2301		MTD_dup21595
Lx2B_dup634		MER63B_dup343
MT2_Mm_dup540		B1_Mur3_dup27411
L1MdF_V_dup6619		MLTR11A_dup334
B1_Mur1_dup13954		ORR1F_dup20868
B3_dup27798		MIR_dup36436
L1MdV_I_dup7872		MLT1A1_dup8808
PB1D10_dup8976		MIRb_dup510
RLTR13A_dup9		MLT1A0_dup7650
L1_Mur2_dup5061		ORR1A0_dup1386
IAPEz-int_dup1626		L1Lx_IV_dup10834
L1M1_dup671		RSINE1_dup106286
IAPEz-int_dup2360		RMER5_dup6581
MTD_dup37360		MLT1D_dup7371
RSINE1_dup59683		L1_Mur2_dup6485
Lx9_dup16571		B2_Mm1t_dup8466
ORR1A4_dup1378		L1MCa_dup945
Charlie1a_dup1501		B1F1_dup10492
Lx8b_dup18171		ID4_v_dup9768
Lx2B_dup4868		L1MdTf_II_dup197
L1MdA_I_dup3212		RLTR19-int_dup985
ID_B1_dup6461		MER2_dup1796
RLTR12B_dup297		B1_Mus2_dup68807
Lx4A_dup1539		L1MdF_IV_dup602
B3A_dup81187		ID_B1_dup4418
PB1D10_dup20146		L1M2_dup427
L1MdGf_II_dup1227		L1MA4A_dup2097
MT2B1_dup1397		B3_dup75500
PB1D10_dup60217		ORR1C2_dup637
L1MdF_I_dup7074		B3_dup78637
L1MdF_V_dup6659		MLT1D_dup851
B3A_dup46790		MTD_dup53842
B1_Mus1_dup36274		MMERVK10C-int_dup1309
		RMER15-int_dup1079
		B2_Mm1a_dup14462
		RLTR4_MM-int_dup3906
		ID4_dup2561
		IAPEz-int_dup260
		L2a_dup6183
		Lx2B_dup1235
		Lx2B_dup573
		RSINE1_dup26205
		B4A_dup83313
		Kanga1c_dup182
		L1MdF_V_dup866
		L1MdF_I_dup6526
		L1MB7_dup1059
		MurSatRep1_dup1126
		ID_B1_dup105500
		MTA_Mm_dup6310
		RSINE1_dup41968
		Lx5c_dup13861
		PB1_dup608
		RSINE1_dup57176
		Lx3A_dup7584
		L1M4c_dup1779
		MIRb_dup27358
		B4A_dup50211
		B1_Mur4_dup6870
		L1MC4a_dup2324
		L1_Rod_dup12779
		B3_dup144870
		B1_Mur3_dup26221
		RSINE1_dup28500
		MIRb_dup16735
		Lx8_dup35274
		B1_Mus1_dup76965
		MMERVK9C_I_dup375
		Lx8_dup1126
		L1MdGf_I_dup769
		L1MdF_V_dup10852
		L1MD2_dup868
		L1MdA_II_dup1176
		MIRc_dup4030
		RLTR18-int_dup78
		L1MdGf_II_dup42
		ERVB5_1-I_MM_dup99
		MER67D_dup379
		Lx3C_dup5515
		ID4_dup3490
		B4A_dup83315
		RCHARR1_dup6688
		B3A_dup30763
		RLTR15_dup868
		B4A_dup37831
		IAPEz-int_dup7308
		L1MdA_III_dup3511
		MIR3_dup107
		MMERVK10C-int_dup262
		L1MdFanc_I_dup8162
		ID_dup8232
		URR1A_dup16450
		B3_dup499
		MMERVK10D3_I_dup17
		MTE2a_dup15337
		B1_Mur4_dup3189
		MurSatRep1_dup2756
		MurSatRep1_dup947
		ID_B1_dup73750
		MIR3_dup1329
		RLTR20C1_MM_dup2412
		MLT1A1_dup3538
		MurSatRep1_dup285
		B2_Mm2_dup9550
		ID_B1_dup47639
		MTD_dup38644
		L3_dup2205
		OldhAT1_dup810
		MTD_dup50454
		L1MB7_dup5883
		B1_Mur3_dup29951
		RLTR12B_dup297
		B1F_dup42038
		L1MdA_I_dup1132
		L2b_dup11531
		MER70A_dup60
		L1MdTf_III_dup87
		B1_Mur3_dup319
		RLTR20A4_dup9489
		RMER13B_dup213
		IAPEz-int_dup6227
		RMER16_Mm_dup49
		MARNA_dup132
		MIR1_Amn_dup5860
		B4A_dup1289
		B1_Mur1_dup31434
		MIRb_dup37545
		L2_dup1495
		PB1D9_dup17726
		ID_B1_dup52981
		ORR1E_dup19824
		B3_dup36157
		MLT1K_dup2502
		MER58A_dup90
		MMERVK10D3_I_dup1110
		B3_dup57730
		L1MdF_V_dup11551
		ORR1A2_dup1185
		L3_dup6967
		L1MdV_III_dup11008
		IAPLTR1_Mm_dup1170
		B4_dup14360
		ORR1D1_dup23137
		RLTR10_dup2672
		L1MC4a_dup993
		B4A_dup1292
		IAPEz-int_dup1001
		ID4_dup3534
		MamRTE1_dup3617
		ERV3-16A3_I_dup608
		PB1D9_dup23325
		MLT1H_dup1823
		Lx2A_dup1290
		RLTR15_dup63
		L1ME2z_dup20
		MLTR25A_dup103
		B1_Mus2_dup30479
		L2c_dup1773
		Lx8b_dup1901
		OldhAT1_dup1680
		MIR_dup379
		B1_Mur1_dup18888
		MER21B_dup1265
		MTD_dup2405
		L1MEc_dup3730
		ERVB3_1-LTR_MM_dup77
		MurSatRep1_dup2115
		L1MdGf_I_dup2035
		ORR1D1_dup22987
		MER58B_dup438
		MurSatRep1_dup2753
		B1_Mus1_dup11683
		L1MdTf_III_dup4177
		L1MdA_I_dup3958
		B1_Mus2_dup10115
		B4A_dup98727
		MamGypLTR1c_dup72
		L2b_dup11976
		Lx5c_dup15886
		Lx8_dup1128
		B1_Mur1_dup37509
		Lx6_dup1290
		B1_Mur1_dup20495
		L1MdA_I_dup466
		RLTR31D_MM_dup4363
		MLT-int_dup684
		ORR1B1_dup17732
		L1MdF_II_dup1384
		RLTR18B_dup556
		B3_dup129341
		RLTR31D_MM_dup6506
		B3_dup40937
		B3_dup522
		B3A_dup15374
		B1_Mur2_dup8451
		L1MdF_V_dup9662
		RLTR20A4_dup14056
		MIR_dup26381
		B4_dup40715
		MurSatRep1_dup2828
		IAPLTR1_Mm_dup269
		B1F2_dup15582
		L1MdA_I_dup2275
		L1MdV_III_dup8446
		RMER19B_dup4729
		L1MdTf_II_dup2749
		RMER6A_dup3991
		B1_Mus1_dup94893
		URR1A_dup6362
		RSINE1_dup105701
		LTR89_dup128
		MTEa_dup277
		IAPEz-int_dup5782
		MTD_dup47871
		MurERV4-int_dup32
		MYSERV16_I_dup712
		L1MA6_dup4998
		MMERVK10D3_I_dup16
		MTEa_dup10654
		RLTR10A_dup484
		ORR1G_dup6034
		MIR3_dup13637
		RLTR20C1_MM_dup2734
		ORR1D1_dup21708
		B4A_dup52462
		ERVB4_1B-I_MM_dup649
		RLTR4_MM-int_dup1897
		MIR_dup1370
		L1Lx_I_dup2345
		L1Lx_I_dup17098
		L1MC4_dup5019
		CYRA11_Mm_dup1325
		PB1D11_dup4971
		PB1D9_dup21205
		MER5A_dup8868
		RSINE1_dup106325
		L2b_dup14210
		B2_Mm1t_dup9216
		Lx6_dup7368
		B1_Mus1_dup85427
		L2b_dup5098
		Lx2B2_dup5399
		MTD_dup53839
		Lx7_dup33913
		hAT-N1_Mam_dup22
		L1MdF_I_dup10047
		B1_Mur1_dup31556
		Lx5c_dup384
		RLTR16B_MM_dup1074
		MER5B_dup2026
		MurSatRep1_dup2391
		L1MdF_II_dup1382
		RMER6BA_dup765
		RSINE1_dup107902
		MTA_Mm_dup6984
		B3_dup12051
		RMER2_dup286
		MurSatRep1_dup2625
		MLT1C_dup818
		PB1D9_dup16939
		MIR3_dup7741
		ID4_dup7193
		RLTR17B_Mm_dup27824
		PB1D10_dup35476
		L2d_dup2385
		MT2_Mm_dup1096
		MER70B_dup69
		Lx4B_dup4484
		L1MdTf_I_dup1038
		B1_Mur1_dup6068
		L1MdA_II_dup5059
		L1Lx_IV_dup2520
		RMER6C_dup1042
		RMER17C-int_dup979
		UCON22_dup17
		Lx5b_dup3351
		MurERV4-int_dup1242
		MurSatRep1_dup1177
		PB1D9_dup19595
		MTE2a_dup7789
		MurSatRep1_dup2101
		ORR1B1_dup16912
		B1F1_dup4102
		L1Lx_III_dup1149
		B1_Mur2_dup3921
		RSINE1_dup107224
		RLTR40_dup1097
		RLTR15_dup43
		MamRTE1_dup2818
		IAPEz-int_dup5297
		L1Lx_III_dup11817
		L1MdTf_II_dup2123
		MTE2b_dup15097
		L2_dup10617
		RMER1C_dup6058
		AmnL2-1_dup848
		RLTR17B_Mm_dup4363
		MERVL-int_dup390
		L1MdTf_III_dup103
		RLTR13C1_dup38
		RSINE1_dup45148
		Charlie1a_dup1251
		ID_B1_dup77919
		PB1D9_dup15115
		PB1D11_dup8485
		B1F_dup34820
		L1MdV_III_dup4097
		MER33_dup1908
		B1F_dup37684
		B3_dup9971
		RLTR17B_Mm_dup59349
		B1_Mus2_dup22956
		L1MdF_I_dup5019
		ORR1B1-int_dup3419
		IAPEz-int_dup589
		RSINE1_dup87696
		L1MdMus_II_dup3646
		Tigger5b_Glire_dup944
		Lx7_dup30526
		RLTR26D_MM_dup56
		ORR1D2_dup329
		B1_Mur1_dup18441
		MIRc_dup179
		L1MdTf_III_dup4332
		MTEa_dup3681
		B1_Mur1_dup31610
		B3A_dup67603
		RMER1B_dup1113
		Charlie8_dup557
		PB1D10_dup34935
		Lx8_dup47450
		PB1D10_dup24663
		B3_dup133153
		Lx8_dup52493
		B3_dup683
		L1MdTf_II_dup3361
		PB1D11_dup1337
		MLT2D_dup1234
		PB1D7_dup19705
		B3A_dup40822
		MLT1F_dup602
		MurSatRep1_dup1167
		L1MB7_dup2259
		B3A_dup87337
		L2c_dup7662
		B4A_dup15669
		B1F_dup31806
		B4A_dup13214
		Lx9_dup45917
		L1MdV_I_dup982
		L1MDa_dup2522
		RLTR20A4_dup9421
		MTEb_dup11735
		B3_dup35298
		ORR1C2_dup5146
		MTD_dup44770
		ORR1B1_dup19810
		B2_Mm2_dup18938
		L1MA8_dup2898
		RSINE1_dup53096
		B2_Mm1a_dup15315
		ID4_dup21179
		B3A_dup80387
		ORR1A2_dup6318
		B3A_dup25187
		B1_Mur1_dup1996
		B1_Mus2_dup36911
		MIR3_dup6982
		L1MdA_I_dup1500
		MERVL_2A-int_dup1159
		MTE2b_dup16377
		MamRTE1_dup1740
		RSINE1_dup90637
		L1MdA_VI_dup6768
		MIRc_dup3843
		ORR1F_dup21120
		RSINE1_dup39309
		B4_dup729
		Lx5c_dup13864
		B4A_dup37275
		Lx6_dup908
		MLTR18C_MM_dup389
		MTD_dup3717
		MER45A_dup521
		PB1D7_dup13798
		B1_Mur4_dup5821
		Lx10_dup8986
		L2a_dup10062
		L1MA4_dup111
		L1ME2z_dup23
		MTA_Mm_dup15635
		B2_Mm1a_dup10654
		MT2B_dup4005
		Tigger17a_dup371
		IAPEz-int_dup2290
		OldhAT1_dup975
		RLTR51A_Mm_dup898
		ID_B1_dup67356
		L2_dup1756
		B3_dup40334
		B4A_dup55562
		L1MdA_III_dup2409
		B3_dup123393
		ID4_v_dup24801
		L1MdF_I_dup9559
		B1F2_dup398
		MER5A1_dup2457
		L1MC1_dup4985
		MurSatRep1_dup1028
		B4A_dup88177
		Lx7_dup827
		Lx4A_dup10528
		B2_Mm2_dup3326
		B3A_dup70202
		MIRb_dup38046
		MurERV4-int_dup479
		MIR3_dup1392
		MTD_dup37310
		ETnERV3-int_dup597
		Cheshire_dup1171
		Lx2_dup500
		B2_Mm1a_dup214
		PB1D10_dup49754
		MurSatRep1_dup1171
		MER5A_dup8827
		L1MD_dup2684
		L1MB1_dup2010
		PB1D10_dup23435
		RSINE1_dup40811
		ID_B1_dup69345
		MurSatRep1_dup2687
		Lx8_dup1130
		L1MB4_dup2468
		L1Lx_I_dup8409
		RLTR45-int_dup42
		AmnSINE1_dup882
		L1MC2_dup43
		MMERVK10D3_I_dup841
		RLTR4_MM-int_dup9112
		MamRTE1_dup1273
		ID_B1_dup26615
		ORR1B1_dup16692
		MamRTE1_dup3728
		MTE2a_dup9981
		Lx3C_dup6598
		ID_B1_dup35356
		L2c_dup9075
		RLTR30E_MM_dup56
		MYSERV-int_dup1149
		B4A_dup83312
		ORR1B1_dup18665
		L1MdA_II_dup1659
		Lx7_dup24264
		B1_Mur4_dup5822
		RMER12B_dup389
		ORR1A4_dup6576
		B2_Mm2_dup33686
		B1_Mm_dup8352
		L1_Mur1_dup5459
		L1MCa_dup1268
		L2c_dup5505
		L2c_dup9859
		L1MdF_I_dup839
		Charlie1a_dup1501
		MTE2b_dup15854
		ORR1C2_dup3979
		Tigger19b_dup268
		Lx2_dup6574
		B4A_dup71684
		MIR3_dup9058
		MIR_dup36430
		URR1A_dup7903
		PB1D10_dup55799
		Lx7_dup7880
		B2_Mm2_dup28148
		ID4_v_dup17497
		ID_B1_dup48628
		B4_dup61570
		L1M4b_dup1602
		RMER10A_dup2591
		L1MdTf_III_dup1068
		Lx3A_dup9022
		B1_Mur1_dup19588
		B3A_dup35528
		B3A_dup28441
		MTC_dup11747
		Lx9_dup45924
		MYSERV6-int_dup1200
		L1MD2_dup1184
		PB1D10_dup41711
		ID4_v_dup109
		L1MB7_dup5175
		B3_dup20844
		Lx8b_dup24892
		PB1D7_dup19418
		IAPEz-int_dup5318
		RLTR4_MM-int_dup11166
		MIR_dup9570
		RMER6A_dup784
		L1ME3F_dup56
		L1Lx_I_dup1287
		MMTV-int_dup14
		L1MdA_III_dup3751
		L1MdTf_I_dup1627
		L3_dup4019
		L1MB2_dup2786
		ID_B1_dup31780
		Lx10_dup3809
		B1F_dup21653
		B2_Mm2_dup21448
		B3_dup55110
		L2_dup17304
		MTD_dup1037
		ID4_dup2482
		B1_Mus2_dup28805
		MTE-int_dup4149
		MYSERV6-int_dup1077
		L2c_dup8134
		MER105_dup35
		IAPEz-int_dup3795
		B1_Mus1_dup26921
		RLTR17B_Mm_dup59360
		PB1D9_dup17342
		B1_Mur1_dup24887
		B1_Mur2_dup15252
		PB1D9_dup28153
		L1MdTf_III_dup4531
		B1_Mus1_dup13353
		B4A_dup90255
		B3A_dup44510
		MurSatRep1_dup1532
		PB1D10_dup13598
		IAPLTR1_Mm_dup845
		MERVL-int_dup1637
		RLTR1B_dup301
		B3_dup124421
		ID4_dup384
		ID_B1_dup44105
		L1Lx_IV_dup1077
		IAPEz-int_dup1798
		MurSatRep1_dup2428
		ORR1A1_dup77
		RMER16-int_dup84
		B3A_dup26783
		L1_Rod_dup3169
		B1_Mus1_dup39296
		Lx5c_dup9019
		L1MdMus_I_dup374
		MIR_dup36431
		PB1D10_dup57225
		MIRc_dup24
		RLTR20A_dup6
		MTA_Mm_dup16514
		PB1D7_dup20562
		IAPEz-int_dup5199
		ID4_v_dup20922
		L1MdFanc_I_dup2561
		Lx_dup3984
		L1MA7_dup3087
		Tigger10_dup97
		RMER3D-int_dup1089
		RSINE1_dup43226
		ID_B1_dup1016
		B1_Mur1_dup37196
		RMER10A_dup2333
		B4A_dup40686
		IAPEz-int_dup1085
		RLTR45-int_dup394
		MTEa_dup6746
		Lx3A_dup2519
		L1MdTf_III_dup4416
		L1Lx_III_dup12818
		L1MdV_III_dup8775
		L1ME3A_dup1245
		B1_Mus1_dup32655
		L1MdF_III_dup1122
		L1MdV_III_dup3941
		MLT1C2_dup6462
		ORR1E_dup16844
		L1MdA_VI_dup3453
		RSINE1_dup46370
		B1_Mur1_dup31098
		B2_Mm1t_dup24923
		Lx8_dup41515
		B3A_dup37022
		MurSatRep1_dup2713
		Lx_dup6252
		Lx5c_dup16444
		MIRc_dup9238
		B3_dup7372
		IMPB_01_dup15482
		L1MB3_dup4931
		RSINE1_dup36435
		ID_B1_dup41732
		Lx6_dup822
		B1F_dup17466
		L1MdN_I_dup138
		LTR108a_Mam_dup1
		MurSatRep1_dup2441
		L1ME3E_dup109
		L1MdA_VI_dup321
		L1MdV_I_dup4542
		L1MdGf_I_dup698
		RLTR10_dup548
		Lx8_dup39500
		MTE2a_dup873
		L1MdF_V_dup12136
		L1MdTf_I_dup1695
		B3A_dup82824
		MTB_Mm_dup4028
		Lx8_dup4646
		RMER4A_dup894
		Lx5_dup12810
		B3_dup19263
		ORR1B1_dup8252
		PB1D11_dup7791
		B4A_dup29197
		MLT1A0_dup3116
		Lx8b_dup7442
		RLTR6_Mm_dup95
		MIRb_dup38838
		PB1D10_dup39441
		MTC_dup18178
		RSINE1_dup72975
		B1F2_dup888
		MIR1_Amn_dup6182
		RMER4A_dup1508
		Lx8b_dup15367
		MTC_dup26921
		RSINE1_dup96776
		B4A_dup20961
		B2_Mm1a_dup962
		B2_Mm2_dup15438
		L1MdA_II_dup2267
		B3A_dup9748
		Plat_L3_dup536
		B2_Mm2_dup85400
		L3_dup173
		L1M4_dup7726
		MurSatRep1_dup941
		ID2_dup4687
		PB1D11_dup9072
		B3A_dup80023
		ORR1A2_dup11787
		MLT1C2_dup1069
		L1MdGf_II_dup6797
		ID_B1_dup107069
		L1MB8_dup1660
		Lx8_dup46701
		L1Lx_IV_dup10833
		B3A_dup33959
		B1_Mur4_dup25696
		Tigger10_dup141
		L2d_dup2639
		RLTR41A2_dup365
		B4_dup29082
		RLTR20C2_MM_dup930
		RSINE1_dup23929
		RMER19C_dup254
		B3_dup129559
		PB1D10_dup21280
		ORR1A3-int_dup8227
		MLT1J1_dup1073
		ID_B1_dup67768
		B1_Mur3_dup19975
		L1MdGf_II_dup1638
		B4_dup56726
		ORR1B1_dup13558
		L1MdF_III_dup10152
		Zaphod4a_dup75
		PB1D9_dup5098
		MTEa_dup3682
		RMER6D_dup638
		L1MdTf_III_dup2177
		RLTR41C_dup6
		MTEa_dup18405
		X11_DNA_dup22
		MLT1C2_dup91
		B2_Mm1t_dup3426
		RMER5_dup5655
		RMER16-int_dup277
		B1_Mur4_dup22209
		MIRb_dup24964
		B3_dup113534
		B3A_dup52108
		RLTR31M_dup154
		MurSatRep1_dup512
		MLT1D_dup7330
		B4A_dup94147
		ORR1B1-int_dup13783
		Lx_dup12146
		B3_dup60081
		MER20_dup2631
		RLTR20A4_dup14252
		B3A_dup2298
		B1F1_dup5822
		L3b_dup182
		L2b_dup4424
		ORR1B1-int_dup53838
		MER20_dup5416
		PB1D7_dup21282
		RLTR4_Mm_dup185
		B1_Mus1_dup44506
		MurSatRep1_dup2639
		B1_Mur2_dup8814
		PB1D7_dup12778
		B1_Mur2_dup9166
		Lx7_dup30093
		Lx3_Mus_dup11463
		IAPEz-int_dup1758
		Lx8b_dup20391
		B1_Mur1_dup9597
		B4_dup32306
		ORR1E_dup4990
		B4A_dup86620
		MLT1C_dup2337
		B2_Mm2_dup1834
		URR1B_dup7233
		Charlie1_dup519
		L1MdGf_I_dup669
		Lx5c_dup6482
		B2_Mm2_dup84716
		MIRc_dup20387
		MER131_dup474
		L3_dup7233
		L1MdA_VII_dup176
		B1_Mus2_dup10557
		B1_Mur2_dup5521
		B3A_dup57949
		MTEb_dup9575
		PB1D7_dup8593
		L2b_dup11198
		PB1D11_dup8994
		ORR1A0_dup2547
		RLTR17B_Mm_dup48792
		L3_dup1471
		MLTR73_dup643
		Lx2_dup1430
		B1_Mur2_dup7119
		L1MdA_II_dup4628
		RSINE1_dup50991
		MTC_dup13571
		RLTR17B_Mm_dup35809
		ORR1G_dup1684
		RLTR20D_dup323
		MER119_dup77
		PB1D9_dup6040
		RLTR19-int_dup70
		LTR16D1_dup11
		ORR1B1-int_dup48408
		L1MCa_dup2604
		ORR1D1_dup23502
		RLTR4_MM-int_dup59
		RLTR35B_MM_dup359
		Lx2B2_dup9211
		L1MA5_dup320
		LTR81B_dup19
		B4A_dup50204
		L1MA4A_dup1575
		L1MdGf_I_dup2408
		ID_B1_dup70580
		ID_B1_dup55577
[truncated: 5,907 more rows]

## Sheet: Table S6
Gene	Molecular species detected	Refs	CTX		HIP		CB		SC		SC-IF
			M	O	M	O	M	O	M	O	M	O
											(MvMADF)	(OvOADF)
Zc3hav1	Cytosolic viral RNA	Lee, 2014 doi/10.1073/pnas.1310604110	1.3	1.6	1.6	1.9	1.8	2.8	1.3	1.6
	CpGs	Luo, 2020 doi.org/10.1016/j.celrep.2019.11.116
Rigi	Cytosolic dsRNA	Luan, 2024 DOI10.3389/fimmu.2024.1287940				1.35	1.8	3		1.3		0.62
Ddx58
Ifih1	Cytosolic dsRNA	Berke, 2012 doi/10.1073/pnas.1212186109				1.5	1.6	2.3		1.4	0.83	0.85
(Mda5)		Asgari, 2017 doi/10.1073/pnas.1704259114
Dhx58	Cytosolic dsRNA	Childs, 2013						1.8		1.45		0.73
(Lgp2)		doi:10.1371/journal.pone.0064202
		Lee, 2024
		doi.org/10.1093/nar/gkad1106
Oas1a	dsRNA	Rex, 2023 doi.org/10.1016/j.coviro.2023.101329				1.9	1.9	3.5		2.2		0.7
		Koul, 2024 doi.org/10.1139/bcb-2023-0369
Oas1b	dsRNA	Rex, 2023 doi.org/10.1016/j.coviro.2023.101329		2.1			3.4	6.9		1.9
		Koul, 2024 doi.org/10.1139/bcb-2023-0369
Oas2	dsRNA	Rex, 2023 doi.org/10.1016/j.coviro.2023.101329				2.5		4.4		2.1
		Koul, 2024 doi.org/10.1139/bcb-2023-0369
Oas3	dsRNA	Rex, 2023 doi.org/10.1016/j.coviro.2023.101329						39.1		3.1
		Koul, 2024 doi.org/10.1139/bcb-2023-0369
Oasl1	dsRNA	Rex, 2023 doi.org/10.1016/j.coviro.2023.101329					2.15	4		1.9
		Koul, 2024 doi.org/10.1139/bcb-2023-0369
Oasl2	dsRNA	Rex, 2023 doi.org/10.1016/j.coviro.2023.101329				2.2	2.7	5.3		2		0.72
		Koul, 2024 doi.org/10.1139/bcb-2023-0369
Eif2ak	dsRNA	Husain, 2012 doi: 10.1021/bi301226h
(Pkr)		Bou-Nader, 2012 doi/10.1261/rna.070169.118.
Nlrp1	dsRNA	Bauernfried, 2021 doi.org/10.1126/science.abd0811
Nlrp6	dsRNA	Shen, 2021 doi:10.1016/j.cell.2021.09.032
Tlr3	Endosomal dsRNA	Miyake, 2022 doi:10.3389/fimmu.2022.941931						1.3				0.85
Tlr7	Endosomal ssRNA	Miyake, 2022 doi:10.3389/fimmu.2022.941931				1.45		2.1		2.3
Tlr8	Endosomal ssRNA	Miyake, 2022 doi:10.3389/fimmu.2022.941931								1.5
Tlr9	Endosomal ssDNA	Miyake, 2022 doi:10.3389/fimmu.2022.941931								2.2		0.75
		Ohto, 2015 doi:10.1038/nature14138
Tlr13	Endosomal	Miyake, 2022 doi:10.3389/fimmu.2022.941931				1.65		2.5		2.7		0.7
	ssRNA	Oldenburg, 2012 doi:10.1126/science.1220363
	(bacterial 23S rRNA)
Ifi203	Cytoplasmic ssDNA	Stavrou, 2015 doi.org/10.1016/j.chom.2015.02.021					1.6	1.8
Ifi204	Cytosolic DNA	Unterholzner, 2020 doi:10.1038/ni.1932				3.4	2.95	6.3	1.8	4.1		0.6
Ifi205	Cytosolic DNA	Nakaya, 2015
		doi.org/10.1128/mBio.00944-17
Ifi211	dsDNA	Predicted						11.7		4.2		0.5
Ifi213	dsDNA	Predicted						6.85		2.75		0.5
Ifi214	dsDNA	Predicted								8.7
Mndal	dsDNA	Predicted						1.7
Aim2	dsDNA	Luan, 2024 DOI10.3389/fimmu.2024.1287940						1.5		1.8
cGas	Cytosolic ss/dsDNA	Sun, 2013								1.6
		doi:10.1126/science.1232458
		Stavrou, 2015 doi.org/10.1016/j.chom.2015.02.021
Zbp1	Cytosolic dsDNA, dsRNA	Takaola, 2007 doi:10.1038/nature06013				2.8		5.5		2.7		0.64
		Zhang, 2020 doi:10.1016/j.cell.2020.02.050
		Jiao, 2020 doi: 10.1038/s41586-020-2129-8
Ddx41	Cytosolic ssDNA	Stavrou, 2015 doi.org/10.1016/j.chom.2015.02.021
Ifit1	ssRNA	Pichlmair, 2011 doi: 10.1038/ni.2048				2.2	2.9	5.6		1.6
Ifit2	ssRNA	Fleith, 2018 doi: 10.1093/nar/gky191					1.8	2.55		1.3		0.87
Ifit3	ssRNA	Fleith, 2018 doi: 10.1093/nar/gky191		1.4		2.4	2.5	4.3		1.5	0.75	0.8
Ifit5	ssRNA	Pichlmair, 2011 doi: 10.1038/ni.2048
Inflammation trigger score			1	3	1	12	12	23	2	24	2	14
Red and blue font indicate increased and decreased expression, respectively.
Fold changes were taken from our DESEQ2 analyses, only DEGs with FDR<0.05 were included.
