# Supplementary material for: Intermittent fasting attenuates CNS inflammaging - rebalancing the transposonome
Source: Research Square preprint supplement (doi:10.21203/rs.3.rs-6165725/v1), 2025-03-12
Supplement: Supplementary file 2 [file 6f4fa2097df17f1069d8837b.xlsx]

## Sheet: Hypergeometric Tests
Cortex Young v Middle										https://systems.crump.ucla.edu/hypergeometric/index.php
DEG	Total Genes
463	21884
Gene List	Number of Genes in List	Overlap	Expected Overlap	Fold Enrichment	Hypergeometric p-value	Corrected p-value	Significant	Percent		Corrected p-value
Positive Regulation of Inflammatory Response	162	3	3.42744	0.87529	0.551043	6.61252	FALSE	1.85185		6.61252
Negative Regulation of Inflammatory Response	171	5	3.61785	1.38204	0.295875	3.5505	FALSE	2.92398		3.5505
Interferon-mediated Signalling	85	1	1.79835	0.556067	0.460332	5.52398	FALSE	1.17647		5.52398
Interleukin-mediated Signalling	111	7	2.34843	2.98072	1.87006e-10	2.24407e-09	TRUE	6.30631		2.24407e-09
Disease Associated Microglia	162	2	3.42744	0.583527	0.330562	3.96674	FALSE	1.23457		3.96674
Microglial Phagocytic Exhaustion	40	2	0.84628	2.36328	0.207256	2.48708	FALSE	5		2.48708
Inflammasomes	18	1	0.380826	2.62587	0.319593	3.83511	FALSE	5.55556		3.83511
Tfam-/-	50	0	1.05785	0	0.342867	4.1144	FALSE	0		4.1144
LINE1 Derepression	25	1	0.528925	1.89063	0.41427	4.97125	FALSE	4		4.97125
cGAS-STING	20	0	0.42314	0	0.651897	7.82277	FALSE	0		7.82277
TE Regulation	141	0	2.98314	0	0.0485608	0.58273	FALSE	0		0.58273
H3K9me3 proteome	99	0	2.09454	0	0.119813	1.43775	FALSE	0		1.43775
Cortex Young v Old
DEG	Total Genes
799	21884
Gene List	Number of Genes in List	Overlap	Expected Overlap	Fold Enrichment	Hypergeometric p-value	Corrected p-value	Significant	Percent		Corrected p-value
Positive Regulation of Inflammatory Response	162	11	5.91473	1.85976	0.0357073	0.428487	FALSE	6.79012		0.428487
Negative Regulation of Inflammatory Response	171	9	6.24333	1.44154	0.174419	2.09303	FALSE	5.26316		2.09303
Interferon-mediated Signalling	85	3	3.10341	0.966679	0.623639	7.48367	FALSE	3.52941		7.48367
Interleukin-mediated Signalling	111	5	4.05269	1.23375	0.381634	4.57961	FALSE	4.5045		4.57961
Disease Associated Microglia	162	10	5.91473	1.69069	0.0736554	0.883865	FALSE	6.17284		0.883865
Microglial Phagocytic Exhaustion	40	3	1.46043	2.05419	0.178611	2.14333	FALSE	7.5		2.14333
Inflammasomes	18	1	0.657192	1.52162	0.488166	5.85799	FALSE	5.55556		5.85799
Tfam-/-	50	7	1.82553	3.83449	0.00214279	0.0257135	TRUE	14		0.0257135
LINE1 Derepression	25	2	0.912767	2.19114	0.23152	2.77824	FALSE	8		2.77824
cGAS-STING	20	0	0.730214	0	0.475111	5.70133	FALSE	0		5.70133
TE Regulation	141	0	5.14801	0	0.0051875	0.06225	FALSE	0		0.06225
H3K9me3 proteome	99	0	3.61456	0	0.0249565	0.299478	FALSE	0		0.299478
Hippocampus Young v Middle
DEG	Total Genes
74	21884
Gene List	Number of Genes in List	Overlap	Expected Overlap	Fold Enrichment	Hypergeometric p-value	Corrected p-value	Significant	Percent		Corrected p-value
Positive Regulation of Inflammatory Response	162	1	0.547797	1.82549	0.423487	5.08185	FALSE	0.617284		5.08185
Negative Regulation of Inflammatory Response	171	3	0.578231	5.18824	0.020274	0.243288	FALSE	1.75439		0.243288
Interferon-mediated Signalling	85	0	0.287425	0	0.749412	8.99294	FALSE	0		8.99294
Interleukin-mediated Signalling	111	0	0.375343	0	0.685965	8.23158	FALSE	0		8.23158
Disease Associated Microglia	162	0	0.547797	0	0.576513	6.91815	FALSE	0		6.91815
Microglial Phagocytic Exhaustion	40	0	0.135259	0	0.873184	10.4782	FALSE	0		10.4782
Inflammasomes	18	0	0.0608664	0	0.94083	11.29	FALSE	0		11.29
Tfam-/-	50	0	0.169073	0	0.844045	10.1285	FALSE	0		10.1285
LINE1 Derepression	25	0	0.0845366	0	0.918764	11.0252	FALSE	0		11.0252
cGAS-STING	20	0	0.0676293	0	0.934472	11.2137	FALSE	0		11.2137
TE Regulation	141	1	0.476787	2.09737	0.380679	4.56815	FALSE	0.70922		4.56815
H3K9me3 proteome	99	0	0.334765	0	0.714561	8.57473	FALSE	0		8.57473
Hippocampus Young v Old
DEG	Total Genes
325	21884
Gene List	Number of Genes in List	Overlap	Expected Overlap	Fold Enrichment	Hypergeometric p-value	Corrected p-value	Significant	Percent		Corrected p-value
Positive Regulation of Inflammatory Response	162	17	2.40587	7.06606	3.36885e-10	4.04263e-09	TRUE	10.4938		4.04263e-09
Negative Regulation of Inflammatory Response	171	11	2.53953	4.33152	5.2401e-05	0.000628811	TRUE	6.43275		0.000628811
Interferon-mediated Signalling	85	9	1.26234	7.12963	4.81156e-06	5.77387e-05	TRUE	10.5882		5.77387e-05
Interleukin-mediated Signalling	111	5	1.64846	3.03313	0.0250702	0.300843	FALSE	4.5045		0.300843
Disease Associated Microglia	162	26	2.40587	10.8069	1.45309e-19	1.74371e-18	TRUE	16.0494		1.74371e-18
Microglial Phagocytic Exhaustion	40	6	0.594041	10.1003	2.56941e-05	0.000308329	TRUE	15		0.000308329
Inflammasomes	18	4	0.267319	14.9634	0.000123952	0.00148743	TRUE	22.2222		0.00148743
Tfam-/-	50	23	0.742552	30.9743	3.06578e-29	3.67893e-28	TRUE	46		3.67893e-28
LINE1 Derepression	25	9	0.371276	24.2407	5.21658e-11	6.2599e-10	TRUE	36		6.2599e-10
cGAS-STING	20	1	0.297021	3.36677	0.258722	3.10466	FALSE	5		3.10466
TE Regulation	141	1	2.094	0.477556	0.378144	4.53773	FALSE	0.70922		4.53773
H3K9me3 proteome	99	0	1.47025	0	0.226586	2.71903	FALSE	0		2.71903
Cerebellum Young v Middle
DEG	Total Genes
211	21884
Gene List	Number of Genes in List	Overlap	Expected Overlap	Fold Enrichment	Hypergeometric p-value	Corrected p-value	Significant	Percent		Corrected p-value
Positive Regulation of Inflammatory Response	162	9	1.56196	5.76198	2.87205e-05	0.000344646	TRUE	5.55556		0.000344646
Negative Regulation of Inflammatory Response	171	6	1.64874	3.63915	0.00638673	0.0766408	FALSE	3.50877		0.0766408
Interferon-mediated Signalling	85	9	0.819549	10.9817	1.32629e-07	1.59155e-06	TRUE	10.5882		1.59155e-06
Interleukin-mediated Signalling	111	3	1.07023	2.80313	0.0923061	1.10767	FALSE	2.7027		1.10767
Disease Associated Microglia	162	12	1.56196	7.68264	5.97581e-08	7.17097e-07	TRUE	7.40741		7.17097e-07
Microglial Phagocytic Exhaustion	40	2	0.38567	5.18578	0.0568159	0.681791	FALSE	5		0.681791
Inflammasomes	18	2	0.173551	11.524	0.0127888	0.153466	FALSE	11.1111		0.153466
Tfam-/-	50	23	0.482087	47.7092	1.08848e-33	1.30617e-32	TRUE	46		1.30617e-32
LINE1 Derepression	25	8	0.241044	33.189	6.14344e-11	7.37213e-10	TRUE	32		7.37213e-10
cGAS-STING	20	1	0.192835	5.18578	0.176223	2.11467	FALSE	5		2.11467
TE Regulation	141	0	1.35949	0	0.253982	3.04778	FALSE	0		3.04778
H3K9me3 proteome	99	0	0.954533	0	0.382384	4.58861	FALSE	0		4.58861
Cerebellum Young v Old
DEG	Total Genes
922	21884
Gene List	Number of Genes in List	Overlap	Expected Overlap	Fold Enrichment	Hypergeometric p-value	Corrected p-value	Significant	Percent		Corrected p-value
Positive Regulation of Inflammatory Response	162	35	6.82526	5.12801	9.19043e-16	1.10285e-14	TRUE	21.6049		1.10285e-14
Negative Regulation of Inflammatory Response	171	19	7.20444	2.63726	0.000113592	0.00136311	TRUE	11.1111		0.00136311
Interferon-mediated Signalling	85	20	3.58116	5.58479	2.65252e-10	3.18302e-09	TRUE	23.5294		3.18302e-09
Interleukin-mediated Signalling	111	13	4.67657	2.77982	0.000800927	0.00961112	TRUE	11.7117		0.00961112
Disease Associated Microglia	162	37	6.82526	5.42104	1.97461e-17	2.36953e-16	TRUE	22.8395		2.36953e-16
Microglial Phagocytic Exhaustion	40	11	1.68525	6.52722	5.26218e-07	6.31462e-06	TRUE	27.5		6.31462e-06
Inflammasomes	18	6	0.758362	7.91179	6.6047e-05	0.000792564	TRUE	33.3333		0.000792564
Tfam-/-	50	40	2.10656	18.9883	2.91071e-46	3.49285e-45	TRUE	80		3.49285e-45
LINE1 Derepression	25	16	1.05328	15.1906	1.24185e-16	1.49022e-15	TRUE	64		1.49022e-15
cGAS-STING	20	3	0.842625	3.5603	0.0498084	0.597701	FALSE	15		0.597701
TE Regulation	141	0	5.9405	0	0.00226722	0.0272067	TRUE	0		0.0272067
H3K9me3 proteome	99	1	4.17099	0.239751	0.0750617	0.90074	FALSE	1.0101		0.90074
Spinal Cord Young v Middle
DEG	Total Genes
510	21884
Gene List	Number of Genes in List	Overlap	Expected Overlap	Fold Enrichment	Hypergeometric p-value	Corrected p-value	Significant	Percent		Corrected p-value
Positive Regulation of Inflammatory Response	162	15	3.77536	3.97313	6.24451e-06	7.49341e-05	TRUE	9.25926		7.49341e-05
Negative Regulation of Inflammatory Response	171	8	3.9851	2.00748	0.0474835	0.569802	FALSE	4.67836		0.569802
Interferon-mediated Signalling	85	0	1.9809	0	0.134223	1.61068	FALSE	0		1.61068
Interleukin-mediated Signalling	111	3	2.58682	1.15972	0.480364	5.76436	FALSE	2.7027		5.76436
Disease Associated Microglia	162	22	3.77536	5.82726	3.06623e-11	3.67948e-10	TRUE	13.5802		3.67948e-10
Microglial Phagocytic Exhaustion	40	9	0.932188	9.65471	2.71697e-07	3.26037e-06	TRUE	22.5		3.26037e-06
Inflammasomes	18	2	0.419485	4.76776	0.0648583	0.7783	FALSE	11.1111		0.7783
Tfam-/-	50	3	1.16523	2.57459	0.110747	1.32896	FALSE	6		1.32896
LINE1 Derepression	25	4	0.582617	6.86557	0.00249961	0.0299953	TRUE	16		0.0299953
cGAS-STING	20	2	0.466094	4.29098	0.0781494	0.937792	FALSE	10		0.937792
TE Regulation	141	0	3.28596	0	0.0355909	0.427091	FALSE	0		0.427091
H3K9me3 proteome	99	0	2.30717	0	0.0963489	1.15619	FALSE	0		1.15619
Spinal Cord Young v Old
DEG	Total Genes
2618	21884
Gene List	Number of Genes in List	Overlap	Expected Overlap	Fold Enrichment	Hypergeometric p-value	Corrected p-value	Significant	Percent		Corrected p-value
Positive Regulation of Inflammatory Response	162	65	19.3802	3.35394	6.06675e-20	7.28011e-19	TRUE	40.1235		7.28011e-19
Negative Regulation of Inflammatory Response	171	49	20.4569	2.39528	2.9802e-09	3.57624e-08	TRUE	28.655		3.57624e-08
Interferon-mediated Signalling	85	29	10.1686	2.85191	7.9838e-08	9.58056e-07	TRUE	34.1176		9.58056e-07
Interleukin-mediated Signalling	111	46	13.279	3.46411	3.65791e-15	4.38949e-14	TRUE	41.4414		4.38949e-14
Disease Associated Microglia	162	68	19.3802	3.50874	4.13654e-22	4.96384e-21	TRUE	41.9753		4.96384e-21
Microglial Phagocytic Exhaustion	40	28	4.78523	5.85134	1.7319e-17	2.07829e-16	TRUE	70		2.07829e-16
Inflammasomes	18	12	2.15335	5.5727	7.76414e-08	9.31697e-07	TRUE	66.6667		9.31697e-07
Tfam-/-	50	34	5.98154	5.68416	2.565e-20	3.078e-19	TRUE	68		3.078e-19
LINE1 Derepression	25	17	2.99077	5.68416	8.39479e-11	1.00737e-09	TRUE	68		1.00737e-09
cGAS-STING	20	8	2.39262	3.34362	0.00138005	0.0165605	TRUE	40		0.0165605
TE Regulation	141	4	16.8679	0.237136	0.000102307	0.00122768	TRUE	2.83688		0.00122768
H3K9me3 proteome	99	5	11.8434	0.422174	0.0167616	0.201139	FALSE	5.05051		0.201139
Spinal Cord Middle v Middle IF
DEG	Total Genes
212	21884
Gene List	Number of Genes in List	Overlap	Expected Overlap	Fold Enrichment	Hypergeometric p-value	Corrected p-value	Significant	Percent		Corrected p-value
Positive Regulation of Inflammatory Response	162	3	1.56937	1.9116	0.207792	2.4935	FALSE	1.85185		2.4935
Negative Regulation of Inflammatory Response	171	7	1.65655	4.22564	0.00142389	0.0170867	TRUE	4.09357		0.0170867
Interferon-mediated Signalling	85	0	0.823433	0	0.436465	5.23758	FALSE	0		5.23758
Interleukin-mediated Signalling	111	1	1.07531	0.929968	0.707888	8.49465	FALSE	0.900901		8.49465
Disease Associated Microglia	162	2	1.56937	1.2744	0.466705	5.60046	FALSE	1.23457		5.60046
Microglial Phagocytic Exhaustion	40	1	0.387498	2.58066	0.322764	3.87317	FALSE	2.5		3.87317
Inflammasomes	18	1	0.174374	5.7348	0.160788	1.92946	FALSE	5.55556		1.92946
Tfam-/-	50	3	0.484372	6.19358	0.0125768	0.150922	FALSE	6		0.150922
LINE1 Derepression	25	1	0.242186	4.12906	0.216121	2.59346	FALSE	4		2.59346
cGAS-STING	20	0	0.193749	0	0.823017	9.8762	FALSE	0		9.8762
TE Regulation	141	2	1.36593	1.4642	0.397372	4.76846	FALSE	1.41844		4.76846
H3K9me3 proteome	99	1	0.959057	1.04269	0.619362	7.43235	FALSE	1.0101		7.43235
Spinal Cord Old v Old IF
DEG	Total Genes
2351	21884
Gene List	Number of Genes in List	Overlap	Expected Overlap	Fold Enrichment	Hypergeometric p-value	Corrected p-value	Significant	Percent		Corrected p-value
Positive Regulation of Inflammatory Response	162	26	17.4037	1.49394	0.0241289	0.289547	FALSE	16.0494		0.289547
Negative Regulation of Inflammatory Response	171	25	18.3705	1.36087	0.0687692	0.825231	FALSE	14.6199		0.825231
Interferon-mediated Signalling	85	15	9.13156	1.64266	0.0363243	0.435892	FALSE	17.6471		0.435892
Interleukin-mediated Signalling	111	21	11.9247	1.76104	0.007013	0.084156	FALSE	18.9189		0.084156
Disease Associated Microglia	162	52	17.4037	2.98787	1.4851e-13	1.78212e-12	TRUE	32.0988		1.78212e-12
Microglial Phagocytic Exhaustion	40	14	4.2972	3.25793	4.05388e-05	0.000486466	TRUE	35		0.000486466
Inflammasomes	18	6	1.93374	3.10279	0.00905929	0.108712	FALSE	33.3333		0.108712
Tfam-/-	50	23	5.3715	4.28185	2.80748e-10	3.36898e-09	TRUE	46		3.36898e-09
LINE1 Derepression	25	8	2.68575	2.97868	0.0035355	0.042426	TRUE	32		0.042426
cGAS-STING	20	4	2.1486	1.86168	0.160718	1.92862	FALSE	20		1.92862
TE Regulation	141	26	15.1476	1.71644	0.00419361	0.0503233	FALSE	18.4397		0.0503233
H3K9me3 proteome	99	14	10.6356	1.31634	0.173802	2.08563	FALSE	14.1414		2.08563

## Sheet: CTX YvM
Positive regulation of inflammatory response	3		Negative regulation of inflammatory response	5		Interferon-mediated signalling	1		Interleukin-mediated signalling	7		DAMs 2021	2		Microglial Exhaustion	2		Inflammasomes	1		cGAS-STING	0		Tfam-/-	0		LINE1 Derepression	1		TE Regulation	0		H3K9me3 proteome	0
Abcc1	Casp1		Abr	Gpr17		Adar	Usp29		Akt1	C1qtnf4		4632427E13Rik	Chst1		Ager	Cd38		Aim2	Casp1		Akt1			Abi3bp			Bst2	Ifi27		Actb			BCLAF1
Adam8	H2-T22		Acod1	Il33		Arg1			C1qtnf4	Il1r1		9130401M01Rik	Thbs1		Anxa1	Il33		Casp1			Aurkb			Agrn			Cxcl10			Actl6a			CHTOP
Adora2b	Il33		Acp5	Nlrc3		Cactin			Casp4	Il33		Acaca			Bcl6			Casp4			Banf1			Apol9b			Ifi204			Actl6b			Crebrf
Adora3			Ada	Nr1d1		Cdc37			Cd300lf	Jak3		Ache			Ccl2			Ddx3x			Cdk1			Bst2			Ifi27			Ago2			CBX1
Aim2			Adcyap1	Pglyrp1		Cnot7			Cd4	Rps6ka5		Adarb1			Ccr2			Dhx33			Cgas			Ccl2			Ifi30			Alkbh5			CBX3
Alox5ap			Adipoq			Dcst1			Cebpa	Spi1		Adck5			Ccr5			Gsdmd			Ifi204			Cmpk2			Ifih1			Arid1a			CBX5
Aoc3			Adora1			Dnaja3			Csf2rb	St18		Ank			Cd244a			Il18			Irf3			Cxcl10			Ifit1			Arid1b			CCDC137
App			Adora2a			Eif4e2			Csf2rb2			Ankrd16			Cd274			Il1b			Irf9			Dhx58			Ifit2			Arid2			CCDC59
Btk			Ahr			Fadd			Ctr9			Apbb2			Cd38			Naip1			Lyplal1			Dtx3l			Ifit3			Atf7ip			CCDC86
C2cd4a			Alox5			Gigyf2			Cxcr2			Aplp2			Cd72			Naip2			Map3k7			Enpep			Ifitm1			Atrx			CEBPZ
C2cd4b			Aoah			Hdac4			Cyld			Apoe			Cd74			Naip5			Nfkb1			Enpp2			Ifitm3			Bap1			CHAF1A
C3			Apoa1			Hpx			Egr1			Aprt			Cd86			Naip6			Parp1			Gbp2			Ifna1			Bcl7a			YBX3
Camk2n1			Apoe			Ifih1			Fcer1g			Arap2			Clec7a			Nlrc4			Ppp6c			Gbp3			Ifna2			Bcl7b			CUX1
Casp1			Arnt			Ifitm1			Fer			Arrdc4			Csf1			Nlrp1a			Prkdc			Gbp7			Ifne			Bcl7c			DDX17
Casp4			Ash1l			Ifitm2			Gab1			Asb10			Cxcl10			Nlrp1b			Sting1			H2-Q4			Irf5			Bicra			DDX5
Ccl1			Bcr			Ifitm3			Gfi1			Atf3			Entpd1			Nlrp3			Tab1			Helz2			Isg15			Bicral			EBNA1BP2
Ccl3			C1qtnf3			Ifitm6			Ikbkb			Atp11c			Havcr2			Nlrp6			Tbk1			Ifi35			Jak1			Brd4			ERH
Ccl5			C1qtnf12			Ifitm7			Ikbke			Atp6v0c			Icos			Pycard			Zbp1			Ifi44			Mal			Brd7			EXOSC10
Ccl24			Ccn3			Ifna1			Il11			Atp6v0c-ps2			Il2rb						Zdhhc18			Ifih1			Mx1			Brd9			FUS
Ccn4			Cd24a			Ifnar1			Il11ra1			Axl			Il33						Zdhhc9			Ifit1			Mx2			Cbx1			FYTTD1
Ccr2			Cd44			Ifnar2			Il11ra2			Baiap2l2			Il7r									Ifit3			Oas2			Cbx3			GATAD2A
Ccr5			Cd200			Ifnb1						Bcl2a1b			Kit									Ifit3b			Rigi			Cbx5			GATAD2B
Ccr7			Cd200l1			Ifng			Il12a			Birc5			Klf4									Igtp			Stat1			Cdk2ap1			Nop53
Cd24a			Cd200l2			Ifngr1			Il12b			Bola2			Lag3									Iigp1			Stat3			Cdk2ap2			HDLBP
Cd28			Cd200r1			Ifngr2			Il12rb1			Cadm1			Ly96									Irf7			Tnfsf10			Chaf1a			HMGA1
Cd47			Cd276			Igtp			Il12rb2			Capg			Myd88									Irf9						Chaf1b			HNRNPA2B1
Cd81			Cdh5			Ikbke			Il15			Ccdc88a			Nfkb1									Irgm1						Chd3			HNRNPK
Cebpa			Chrna7			Irak1			Il15ra			Ccl3			P2rx7									Irgm2						Chd4			HNRNPL
Cebpb			Cst7			Irf1			Il17a			Ccl4			Pdcd1									Isg15						Chd5			HP1BP3
Clock			Ctla2a			Irf3			Il17f			Ccl6			Prickle1									Lgals3bp						Ctcf			KHDRBS1
Cnr1			Cx3cr1			Irf7			Il17ra			Cd22			S100a8									Mx2						Daxx			KHDRBS3
Csf1r			Cxcl17			Irgm1			Il17rc			Cd34			Satb1									Oas1a						Ddx4			LLPH
Ctsc			Cyld			Irgm2			Il18			Cd52			Sirpa									Oasl2						Dgcr8			LOXL1
Ctss			Cyp19a1			Isg15			Il18r1			Cd63			Socs3									Parp10						Dhx9			LOXL2
Ddt			Dusp10			Jak1			Il18rap			Cd74			Spp1									Parp14						Dicer1			LTBP2
Dhx9			Elf4			Jak2			Il1a			Cd83			Stat1									Parp9						Dnmt1			MATR3
Ets1			Enpp3			Lsm14a			Il1b			Cd9			Tcf7									Psmb8						Dnmt3a			MBD3
Fabp4			Ets1			Mavs			Il1r1			Cdc42ep3			Ticam1									Rigi						Dnmt3b			MBNL1
Fcer1a			Extl3			Med1			Il1r2			Cdca8			Ticam2									Rnf213						Dnmt3c			MPHOSPH10
Fcer1g			Fcgr2b			Mettl3			Il1rap			Ch25h			Tirap									Rtp4						Dnmt3l			MRTO4
Fcgr1			Fem1a			Mmp12			Il1rl1			Chst1												Sim2						Dpf1			MYBBP1A
Fcgr3			Fem1al			Mul1			Il1rn			Clec7a												Slfn2						Dpf2			MYEF2
Fem1a			Ffar4			Myd88			Il2			Cops9												Stat1						Dpf3			NCOA5
Ffar2			Fndc4			Nlrc5			Il2ra			Cox6a2												Stat2						Drosha			NCOA7
Ffar3			Foxf1			Oas1a			Il2rb			Cox6c												Tgtp1						Ehmt1			NONO
Gpr4			Foxp3			Oas1b			Il2rg			Cpd												Trim30a						Ehmt2			PES1
Gprc5b			Fpr2			Oas1c			Il3			Crip1												Trim30d						Elp3			PHB
Gpsm3			Fpr3			Oas1d			Il33			Crlf2												Usp18						Fto			PIAS2
Grn			Fpr-rs3			Oas1e			Il34			Csf1												Xaf1						Gatad2a			POLDIP3
Gsdmd			Fpr-rs4			Oas1f			Il3ra			Csf2ra												Zbp1						Gatad2b			PPAN
H2-D1			Fpr-rs6			Oas1g			Il4			Cst7																		Gtsf1			PPHLN1
H2-K1			Fpr-rs7			Oas1h			Il4ra			Ctsb																		H3f3a			PRDM15
H2-M1			Fxr1			Oas2			Il5			Ctsz																		H3f3b			PRMT1
H2-M2			Gata3			Oas3			Il5ra			Cxcl16																		H3f3c			PRRX2
H2-M5			Ghrl			Otop1			Il6			Cybb																		Hdac1			PTBP1
H2-M9			Ghsr			Parp9			Il6ra			Dhcr7																		Hdac2			QKI
H2-M10.1			Git1			Parp14			Il6st			Dhx32																		Hinfp			RBM12B1
H2-M10.2			Gper1			Pparg			Il9r			Dnajc15																		Kmt5b			RBM15
H2-M10.3			Gpr17			Ptpn2			Irak1			Dpcd																		Kmt5c			RBM26
H2-M10.4			Gpr31b			Rbm47			Irak2			Dpp7																		Lig1			RBM6
H2-M10.5			Gps2			Rfpl4b			Irak3			Dusp3																		Mbd2			RBMX
H2-M10.6			Gpx1			Rnf185			Irak4			Echs1																		Mbd3			RBMXL1
H2-M11			Gpx2			Samhd1			Jak1			Egr2																		Mbd5			RELA
H2-Q1			Grn			Sin3a			Jak2			Ell2																		Mbd6			RIF1
H2-Q2			Gstp1			Smim30			Jak3			Enpp1																		Mettl14			RPF1
H2-Q4			Hamp			Stat1			Lyn			Enpp2																		Mettl16			RPF2
H2-Q6			Hgf			Stat2			Map3k7			Ero1b																		Mettl3			RPS19BP1
H2-Q7			Ier3			Sting1			Mapk3			Etl4																		Morc1			SAFB
H2-Q10			Igf1			Tbk1			Mir301			Fam20c																		Morc2a			SAFB2
H2-T3			Igtp			Trex1			Myd88			Fcgr4																		Morc2b			SETDB1
H2-T9			Il2			Trim6			Nfkbia			Fgl2																		Morc3			SFPQ
H2-T10			Il2ra			Trim41			Nlrp6			Frrs1																		Mov10l1			TRA2B
H2-T22			Il4			Trim56			Notch1			Fth1																		Mphosph8			SLTM
H2-T23			Il10			Trim65			Oas2			Ftl1																		Mta1			SUMO2
Hyal2			Il10ra			Trp53			Oasl1			Fxyd5																		Mta2			SUV39H1
Ido1			Il12b			Ttll12			Oasl2			Fxyd6																		Mta3			SUV39H2
Ifi35			Il13			Txk			Otud4			Gfus																		Mtr4			SUZ12
Ifng			Il17a			Tyk2			Parp14			Glipr1																		Nsun2			TAF15
Ighg1			Il20rb			Ube2k			Pdgfb			Gm15772																		Ogt			TARDBP
Ighg2b			Il22			Usp27x			Pik3r1			Gnas																		Pabpn1			TCF25
Il1b			Il22ra1			Usp29			Plcb1			Gng12																		Pbrm1			THRAP3
Il1rl1			Il22ra2			Wnt5a			Ptpn2			Got1																		Phf10			TRA2A
Il6			Il33			Ythdf2			Rela			Gpnmb																		Piwil1			TRIM28
Il16			Ins1			Ythdf3			Ripk1			Gpr65																		Piwil2			UBE2I
Il17ra			Ins2			Zbp1			Rps6ka4			Gusb																		Piwil4			UTP3
Il17rb			Irgm1						Rps6ka5			H2-D1																		Pld6			WDR46
Il18			Irgm2						Smad4			H2-K1																		Pphln1			XRN2
Il33			Isl1						Spi1			H2-Q7																		Pspc1			YBX1
Kars1			Krt1						Src			Hif1a																		Rbbp4			YLPM1
Kcnn4			Ldlr						Srsf1			Ifi204																		Rbbp7			YTHDC1
Lbp			Lgals9						St18			Ifi27l2a																		Rbm26			YY2
Ldlr			Lpcat3						Stat1			Ifi27l2b																		Rbm27			ZC3H13
Lgals1			Lrfn5						Stat3			Ifit1																		Rbm7			Zfp207
Lgals2			Macir						Stat4			Ifit2																		Safb			Zfp326
Lilra5			Mdk						Stat5a			Igf1																		Safb2			Zfp438
Lpl			Mefv						Stat6			Il1b																		Setdb1			Zfp512
Lrrk2			Metrnl						Syk			Ildr2																		Setdb2			Zfp598
Lta			Mfhas1						Ticam2			Itgax																		Sin3a			Zfp622
Mdk			Mir147						Tirap			Kcnj2																		Sinhcaf			Zfp638
Mefv			Mir7578						Tnip2			Lgals3bp																		Sirt1
Mmp8			Mkrn2						Tollip			Lgi2																		Sirt6
Napepld			Muc19						Traf2			Lmbrd2																		Sltm
Nfkbia			Mvk						Traf3ip2			Lpl																		Smarca2
Nfkbiz			Ndfip1						Traf5			Lyz2																		Smarca4
Ninj1			Nfkb1						Traf6			Lyzl4																		Smarcb1
Nkg7			Nlrc3						Trim32			Mamdc2																		Smarcc1
Nlrp1a			Nlrp3						Tut4			Mblac2																		Smarcc2
Nlrp1b			Nlrp6						Tyk2			Mif																		Smarcd1
Nlrp3			Nlrp12						Usp25			Mir682																		Smarcd2
Nlrp6			Nlrx1						Vrk2			Mrpl27																		Smarcd3
Nlrp10			Nod2						Yap1			Mt1																		Smarce1
Nmi			Npy						Zbp1			Myo1e																		Spen
Nppa			Npy5r									Naglu																		Spocd1
Npy5r			Nr1d1									Nat8l																		Ss18
Nupr1			Nr1d2									Ncbp2as2																		Ss18l1
Osm			Nr1h3									Nceh1																		Ss18l2
Park7			Nr1h4									Ndufv3																		Sumo2
Pdcd4			Nr1h5									Nlrc5																		Suv39h1
Pde2a			Nt5e									Npc2																		Suv39h2
Pde5a			Otulin									Pkib																		Tarbp2
Pik3cg			Pbk									Pld3																		Tasor
Pla2g3			Pdcd10									Pogk																		Tasor2
Plcg2			Pf4									Psat1																		Tet1
Prkca			Pglyrp1									Pycrl																		Tet2
Ptger3			Pla2g5									Ramp1																		Tex15
Ptger4			Pla2g10									Rap2b																		Tnrc18
Ptgs2			Ppara									Rpl23																		Trim28
Pycard			Ppard									Rps18																		Uhrf1
Ripk1			Pparg									Rras																		Uhrf2
Rps19			Proc									S1pr1																		Wiz
S100a8			Psma1									Scd2																		Wtap
S100a9			Psmb4									Scpep1																		Ytdc1
Serpine1			Ptger4									Sdc3																		Ytdc2
Setd4			Ptgis									Serpine2																		Ytdfh2
Snca			Ptpn2									Slamf9																		Ytdhf3
Snx4			Ptpn6									Slc1a2																		Ythdf1
Stap1			Rabgef1									Slc23a2																		Yy1
Stat5a			Rb1									Slc44a1																		Zc3h13
Stat5b			Reg3g									Speg																		Zc3h3
Sucnr1			Rora									Spp1																		Zcchc8
Tac1			Rps19									Srebf2																		Zfc3h1
Tafa3			Selenos									Ssh1
Tgfb1			Sharpin									Ssr4
Tlr2			Siglece									St14
Tlr4			Siglecg									St8sia6
Tlr6			Sirpa									Stim2
Tnf			Slamf8									Sulf2
Tnfrsf1a			Slc39a8									Syngr1
Tnfrsf11a			Smad3									Tbcd
Tnfsf4			Smpdl3b									Thbs1
Tnfsf11			Socs3									Tmem154
Tnfsf18			Socs5									Tpd52
Tnip1			Sod1									Trim32
Tradd			Spn									Tspo
Trem2			Stat3									Ttf1
Trpv4			Syt11									Ttr
Tslp			Tafa3									Tuba1c
Ttbk1			Tff2									Tyrobp
Vamp8			Tnfaip3									Upp2
Wnt5a			Tnfaip6									Zdhhc21
Zbp1			Tnfaip8l2									Zfas1
Zp3			Tnfrsf1a									Zfp692
			Tnfrsf1b
			Trem2
			Trim45
			Trim65
			Tyro3
			Uaca
			Vps35
			Wfdc1
			Zfp36
Grasp			Grasp			Grasp			Grasp			Grasp			Grasp			Grasp						Grasp			Grasp			Grasp			Grasp
Slc5a5			Slc5a5			Slc5a5			Slc5a5			Slc5a5			Slc5a5			Slc5a5						Slc5a5			Slc5a5			Slc5a5			Slc5a5
Sema6b			Sema6b			Sema6b			Sema6b			Sema6b			Sema6b			Sema6b			Grasp			Sema6b			Sema6b			Sema6b			Sema6b
Col1a1			Col1a1			Col1a1			Col1a1			Col1a1			Col1a1			Col1a1			Slc5a5			Col1a1			Col1a1			Col1a1			Col1a1
Gstt1			Gstt1			Gstt1			Gstt1			Gstt1			Gstt1			Gstt1			Sema6b			Gstt1			Gstt1			Gstt1			Gstt1
Pex6			Pex6			Pex6			Pex6			Pex6			Pex6			Pex6			Col1a1			Pex6			Pex6			Pex6			Pex6
Nid1			Nid1			Nid1			Nid1			Nid1			Nid1			Nid1			Gstt1			Nid1			Nid1			Nid1			Nid1
Dio2			Dio2			Dio2			Dio2			Dio2			Dio2			Dio2			Pex6			Dio2			Dio2			Dio2			Dio2
Cabp7			Cabp7			Cabp7			Cabp7			Cabp7			Cabp7			Cabp7			Nid1			Cabp7			Cabp7			Cabp7			Cabp7
Met			Met			Met			Met			Met			Met			Met			Dio2			Met			Met			Met			Met
Adam19			Adam19			Adam19			Adam19			Adam19			Adam19			Adam19			Cabp7			Adam19			Adam19			Adam19			Adam19
Bcas1			Bcas1			Bcas1			Bcas1			Bcas1			Bcas1			Bcas1			Met			Bcas1			Bcas1			Bcas1			Bcas1
Tmem259			Tmem259			Tmem259			Tmem259			Tmem259			Tmem259			Tmem259			Adam19			Tmem259			Tmem259			Tmem259			Tmem259
Scube1			Scube1			Scube1			Scube1			Scube1			Scube1			Scube1			Bcas1			Scube1			Scube1			Scube1			Scube1
Stac2			Stac2			Stac2			Stac2			Stac2			Stac2			Stac2			Tmem259			Stac2			Stac2			Stac2			Stac2
6330403K07Rik			6330403K07Rik			6330403K07Rik			6330403K07Rik			6330403K07Rik			6330403K07Rik			6330403K07Rik			Scube1			6330403K07Rik			6330403K07Rik			6330403K07Rik			6330403K07Rik
Nefh			Nefh			Nefh			Nefh			Nefh			Nefh			Nefh			Stac2			Nefh			Nefh			Nefh			Nefh
Sept4			Sept4			Sept4			Sept4			Sept4			Sept4			Sept4			6330403K07Rik			Sept4			Sept4			Sept4			Sept4
Rab37			Rab37			Rab37			Rab37			Rab37			Rab37			Rab37			Nefh			Rab37			Rab37			Rab37			Rab37
Grin2c			Grin2c			Grin2c			Grin2c			Grin2c			Grin2c			Grin2c			Sept4			Grin2c			Grin2c			Grin2c			Grin2c
Cygb			Cygb			Cygb			Cygb			Cygb			Cygb			Cygb			Rab37			Cygb			Cygb			Cygb			Cygb
Alox8			Alox8			Alox8			Alox8			Alox8			Alox8			Alox8			Grin2c			Alox8			Alox8			Alox8			Alox8
Akr1c18			Akr1c18			Akr1c18			Akr1c18			Akr1c18			Akr1c18			Akr1c18			Cygb			Akr1c18			Akr1c18			Akr1c18			Akr1c18
Klhl1			Klhl1			Klhl1			Klhl1			Klhl1			Klhl1			Klhl1			Alox8			Klhl1			Klhl1			Klhl1			Klhl1
Cacna1i			Cacna1i			Cacna1i			Cacna1i			Cacna1i			Cacna1i			Cacna1i			Akr1c18			Cacna1i			Cacna1i			Cacna1i			Cacna1i
Nectin3			Nectin3			Nectin3			Nectin3			Nectin3			Nectin3			Nectin3			Klhl1			Nectin3			Nectin3			Nectin3			Nectin3
Il33			Il33			Il33			Il33			Il33			Il33			Il33			Cacna1i			Il33			Il33			Il33			Il33
Bhlhe22			Bhlhe22			Bhlhe22			Bhlhe22			Bhlhe22			Bhlhe22			Bhlhe22			Nectin3			Bhlhe22			Bhlhe22			Bhlhe22			Bhlhe22
Col3a1			Col3a1			Col3a1			Col3a1			Col3a1			Col3a1			Col3a1			Il33			Col3a1			Col3a1			Col3a1			Col3a1
Il1r1			Il1r1			Il1r1			Il1r1			Il1r1			Il1r1			Il1r1			Bhlhe22			Il1r1			Il1r1			Il1r1			Il1r1
Tnnt2			Tnnt2			Tnnt2			Tnnt2			Tnnt2			Tnnt2			Tnnt2			Col3a1			Tnnt2			Tnnt2			Tnnt2			Tnnt2
Rgs5			Rgs5			Rgs5			Rgs5			Rgs5			Rgs5			Rgs5			Il1r1			Rgs5			Rgs5			Rgs5			Rgs5
Mrc1			Mrc1			Mrc1			Mrc1			Mrc1			Mrc1			Mrc1			Tnnt2			Mrc1			Mrc1			Mrc1			Mrc1
Frzb			Frzb			Frzb			Frzb			Frzb			Frzb			Frzb			Rgs5			Frzb			Frzb			Frzb			Frzb
Gatm			Gatm			Gatm			Gatm			Gatm			Gatm			Gatm			Mrc1			Gatm			Gatm			Gatm			Gatm
Bmp2			Bmp2			Bmp2			Bmp2			Bmp2			Bmp2			Bmp2			Frzb			Bmp2			Bmp2			Bmp2			Bmp2
Cd93			Cd93			Cd93			Cd93			Cd93			Cd93			Cd93			Gatm			Cd93			Cd93			Cd93			Cd93
Postn			Postn			Postn			Postn			Postn			Postn			Postn			Bmp2			Postn			Postn			Postn			Postn
Calb1			Calb1			Calb1			Calb1			Calb1			Calb1			Calb1			Cd93			Calb1			Calb1			Calb1			Calb1
Csmd2			Csmd2			Csmd2			Csmd2			Csmd2			Csmd2			Csmd2			Postn			Csmd2			Csmd2			Csmd2			Csmd2
Gm996			Gm996			Gm996			Gm996			Gm996			Gm996			Gm996			Calb1			Gm996			Gm996			Gm996			Gm996
Ptpro			Ptpro			Ptpro			Ptpro			Ptpro			Ptpro			Ptpro			Csmd2			Ptpro			Ptpro			Ptpro			Ptpro
Vamp1			Vamp1			Vamp1			Vamp1			Vamp1			Vamp1			Vamp1			Gm996			Vamp1			Vamp1			Vamp1			Vamp1
Plekhb1			Plekhb1			Plekhb1			Plekhb1			Plekhb1			Plekhb1			Plekhb1			Ptpro			Plekhb1			Plekhb1			Plekhb1			Plekhb1
Robo3			Robo3			Robo3			Robo3			Robo3			Robo3			Robo3			Vamp1			Robo3			Robo3			Robo3			Robo3
Zdhhc14			Zdhhc14			Zdhhc14			Zdhhc14			Zdhhc14			Zdhhc14			Zdhhc14			Plekhb1			Zdhhc14			Zdhhc14			Zdhhc14			Zdhhc14
Evpl			Evpl			Evpl			Evpl			Evpl			Evpl			Evpl			Robo3			Evpl			Evpl			Evpl			Evpl
Prr7			Prr7			Prr7			Prr7			Prr7			Prr7			Prr7			Zdhhc14			Prr7			Prr7			Prr7			Prr7
Htr2a			Htr2a			Htr2a			Htr2a			Htr2a			Htr2a			Htr2a			Evpl			Htr2a			Htr2a			Htr2a			Htr2a
Dok3			Dok3			Dok3			Dok3			Dok3			Dok3			Dok3			Prr7			Dok3			Dok3			Dok3			Dok3
Fstl4			Fstl4			Fstl4			Fstl4			Fstl4			Fstl4			Fstl4			Htr2a			Fstl4			Fstl4			Fstl4			Fstl4
Pcdh8			Pcdh8			Pcdh8			Pcdh8			Pcdh8			Pcdh8			Pcdh8			Dok3			Pcdh8			Pcdh8			Pcdh8			Pcdh8
Megf11			Megf11			Megf11			Megf11			Megf11			Megf11			Megf11			Fstl4			Megf11			Megf11			Megf11			Megf11
Galnt6			Galnt6			Galnt6			Galnt6			Galnt6			Galnt6			Galnt6			Pcdh8			Galnt6			Galnt6			Galnt6			Galnt6
Shank2			Shank2			Shank2			Shank2			Shank2			Shank2			Shank2			Megf11			Shank2			Shank2			Shank2			Shank2
Notch3			Notch3			Notch3			Notch3			Notch3			Notch3			Notch3			Galnt6			Notch3			Notch3			Notch3			Notch3
Pcp4l1			Pcp4l1			Pcp4l1			Pcp4l1			Pcp4l1			Pcp4l1			Pcp4l1			Shank2			Pcp4l1			Pcp4l1			Pcp4l1			Pcp4l1
Ciart			Ciart			Ciart			Ciart			Ciart			Ciart			Ciart			Notch3			Ciart			Ciart			Ciart			Ciart
Pcsk1n			Pcsk1n			Pcsk1n			Pcsk1n			Pcsk1n			Pcsk1n			Pcsk1n			Pcp4l1			Pcsk1n			Pcsk1n			Pcsk1n			Pcsk1n
Gpr37			Gpr37			Gpr37			Gpr37			Gpr37			Gpr37			Gpr37			Ciart			Gpr37			Gpr37			Gpr37			Gpr37
Thbs1			Thbs1			Thbs1			Thbs1			Thbs1			Thbs1			Thbs1			Pcsk1n			Thbs1			Thbs1			Thbs1			Thbs1
C1qtnf4			C1qtnf4			C1qtnf4			C1qtnf4			C1qtnf4			C1qtnf4			C1qtnf4			Gpr37			C1qtnf4			C1qtnf4			C1qtnf4			C1qtnf4
Cyyr1			Cyyr1			Cyyr1			Cyyr1			Cyyr1			Cyyr1			Cyyr1			Thbs1			Cyyr1			Cyyr1			Cyyr1			Cyyr1
Inhba			Inhba			Inhba			Inhba			Inhba			Inhba			Inhba			C1qtnf4			Inhba			Inhba			Inhba			Inhba
Nlrp5-ps			Nlrp5-ps			Nlrp5-ps			Nlrp5-ps			Nlrp5-ps			Nlrp5-ps			Nlrp5-ps			Cyyr1			Nlrp5-ps			Nlrp5-ps			Nlrp5-ps			Nlrp5-ps
Abca8a			Abca8a			Abca8a			Abca8a			Abca8a			Abca8a			Abca8a			Inhba			Abca8a			Abca8a			Abca8a			Abca8a
Dlgap3			Dlgap3			Dlgap3			Dlgap3			Dlgap3			Dlgap3			Dlgap3			Nlrp5-ps			Dlgap3			Dlgap3			Dlgap3			Dlgap3
Epop			Epop			Epop			Epop			Epop			Epop			Epop			Abca8a			Epop			Epop			Epop			Epop
Mdga1			Mdga1			Mdga1			Mdga1			Mdga1			Mdga1			Mdga1			Dlgap3			Mdga1			Mdga1			Mdga1			Mdga1
Sowaha			Sowaha			Sowaha			Sowaha			Sowaha			Sowaha			Sowaha			Epop			Sowaha			Sowaha			Sowaha			Sowaha
Erich5			Erich5			Erich5			Erich5			Erich5			Erich5			Erich5			Mdga1			Erich5			Erich5			Erich5			Erich5
Lsm11			Lsm11			Lsm11			Lsm11			Lsm11			Lsm11			Lsm11			Sowaha			Lsm11			Lsm11			Lsm11			Lsm11
Scand1			Scand1			Scand1			Scand1			Scand1			Scand1			Scand1			Erich5			Scand1			Scand1			Scand1			Scand1
Scn4b			Scn4b			Scn4b			Scn4b			Scn4b			Scn4b			Scn4b			Lsm11			Scn4b			Scn4b			Scn4b			Scn4b
Hrk			Hrk			Hrk			Hrk			Hrk			Hrk			Hrk			Scand1			Hrk			Hrk			Hrk			Hrk
Fat4			Fat4			Fat4			Fat4			Fat4			Fat4			Fat4			Scn4b			Fat4			Fat4			Fat4			Fat4
Dusp18			Dusp18			Dusp18			Dusp18			Dusp18			Dusp18			Dusp18			Hrk			Dusp18			Dusp18			Dusp18			Dusp18
Tshz2			Tshz2			Tshz2			Tshz2			Tshz2			Tshz2			Tshz2			Fat4			Tshz2			Tshz2			Tshz2			Tshz2
Marcksl1			Marcksl1			Marcksl1			Marcksl1			Marcksl1			Marcksl1			Marcksl1			Dusp18			Marcksl1			Marcksl1			Marcksl1			Marcksl1
Pls1			Pls1			Pls1			Pls1			Pls1			Pls1			Pls1			Tshz2			Pls1			Pls1			Pls1			Pls1
H2afx			H2afx			H2afx			H2afx			H2afx			H2afx			H2afx			Marcksl1			H2afx			H2afx			H2afx			H2afx
Kcnk12			Kcnk12			Kcnk12			Kcnk12			Kcnk12			Kcnk12			Kcnk12			Pls1			Kcnk12			Kcnk12			Kcnk12			Kcnk12
Rtn4rl2			Rtn4rl2			Rtn4rl2			Rtn4rl2			Rtn4rl2			Rtn4rl2			Rtn4rl2			H2afx			Rtn4rl2			Rtn4rl2			Rtn4rl2			Rtn4rl2
Lingo3			Lingo3			Lingo3			Lingo3			Lingo3			Lingo3			Lingo3			Kcnk12			Lingo3			Lingo3			Lingo3			Lingo3
Tmem198			Tmem198			Tmem198			Tmem198			Tmem198			Tmem198			Tmem198			Rtn4rl2			Tmem198			Tmem198			Tmem198			Tmem198
Gpr17			Gpr17			Gpr17			Gpr17			Gpr17			Gpr17			Gpr17			Lingo3			Gpr17			Gpr17			Gpr17			Gpr17
Epha3			Epha3			Epha3			Epha3			Epha3			Epha3			Epha3			Tmem198			Epha3			Epha3			Epha3			Epha3
Zfp771			Zfp771			Zfp771			Zfp771			Zfp771			Zfp771			Zfp771			Gpr17			Zfp771			Zfp771			Zfp771			Zfp771
Dach1			Dach1			Dach1			Dach1			Dach1			Dach1			Dach1			Epha3			Dach1			Dach1			Dach1			Dach1
Cd248			Cd248			Cd248			Cd248			Cd248			Cd248			Cd248			Zfp771			Cd248			Cd248			Cd248			Cd248
Ide			Ide			Ide			Ide			Ide			Ide			Ide			Dach1			Ide			Ide			Ide			Ide
Gpc6			Gpc6			Gpc6			Gpc6			Gpc6			Gpc6			Gpc6			Cd248			Gpc6			Gpc6			Gpc6			Gpc6
Hist1h4d			Hist1h4d			Hist1h4d			Hist1h4d			Hist1h4d			Hist1h4d			Hist1h4d			Ide			Hist1h4d			Hist1h4d			Hist1h4d			Hist1h4d
Sox11			Sox11			Sox11			Sox11			Sox11			Sox11			Sox11			Gpc6			Sox11			Sox11			Sox11			Sox11
H2-K2			H2-K2			H2-K2			H2-K2			H2-K2			H2-K2			H2-K2			Hist1h4d			H2-K2			H2-K2			H2-K2			H2-K2
Hist1h3a			Hist1h3a			Hist1h3a			Hist1h3a			Hist1h3a			Hist1h3a			Hist1h3a			Sox11			Hist1h3a			Hist1h3a			Hist1h3a			Hist1h3a
Marcks			Marcks			Marcks			Marcks			Marcks			Marcks			Marcks			H2-K2			Marcks			Marcks			Marcks			Marcks
Vmn2r84			Vmn2r84			Vmn2r84			Vmn2r84			Vmn2r84			Vmn2r84			Vmn2r84			Hist1h3a			Vmn2r84			Vmn2r84			Vmn2r84			Vmn2r84
Eid2b			Eid2b			Eid2b			Eid2b			Eid2b			Eid2b			Eid2b			Marcks			Eid2b			Eid2b			Eid2b			Eid2b
Jund			Jund			Jund			Jund			Jund			Jund			Jund			Vmn2r84			Jund			Jund			Jund			Jund
Egr4			Egr4			Egr4			Egr4			Egr4			Egr4			Egr4			Eid2b			Egr4			Egr4			Egr4			Egr4
Cebpd			Cebpd			Cebpd			Cebpd			Cebpd			Cebpd			Cebpd			Jund			Cebpd			Cebpd			Cebpd			Cebpd
Sox4			Sox4			Sox4			Sox4			Sox4			Sox4			Sox4			Egr4			Sox4			Sox4			Sox4			Sox4
Ass1			Ass1			Ass1			Ass1			Ass1			Ass1			Ass1			Cebpd			Ass1			Ass1			Ass1			Ass1
Ighg2c			Ighg2c			Ighg2c			Ighg2c			Ighg2c			Ighg2c			Ighg2c			Sox4			Ighg2c			Ighg2c			Ighg2c			Ighg2c
Gm13212			Gm13212			Gm13212			Gm13212			Gm13212			Gm13212			Gm13212			Ass1			Gm13212			Gm13212			Gm13212			Gm13212
Nwd2			Nwd2			Nwd2			Nwd2			Nwd2			Nwd2			Nwd2			Ighg2c			Nwd2			Nwd2			Nwd2			Nwd2
Cdk5r2			Cdk5r2			Cdk5r2			Cdk5r2			Cdk5r2			Cdk5r2			Cdk5r2			Gm13212			Cdk5r2			Cdk5r2			Cdk5r2			Cdk5r2
Gm765			Gm765			Gm765			Gm765			Gm765			Gm765			Gm765			Nwd2			Gm765			Gm765			Gm765			Gm765
Vmn2r85			Vmn2r85			Vmn2r85			Vmn2r85			Vmn2r85			Vmn2r85			Vmn2r85			Cdk5r2			Vmn2r85			Vmn2r85			Vmn2r85			Vmn2r85
D430019H16Rik			D430019H16Rik			D430019H16Rik			D430019H16Rik			D430019H16Rik			D430019H16Rik			D430019H16Rik			Gm765			D430019H16Rik			D430019H16Rik			D430019H16Rik			D430019H16Rik
AC149090.1			AC149090.1			AC149090.1			AC149090.1			AC149090.1			AC149090.1			AC149090.1			Vmn2r85			AC149090.1			AC149090.1			AC149090.1			AC149090.1
Hist1h3d			Hist1h3d			Hist1h3d			Hist1h3d			Hist1h3d			Hist1h3d			Hist1h3d			D430019H16Rik			Hist1h3d			Hist1h3d			Hist1h3d			Hist1h3d
Hist1h3f			Hist1h3f			Hist1h3f			Hist1h3f			Hist1h3f			Hist1h3f			Hist1h3f			AC149090.1			Hist1h3f			Hist1h3f			Hist1h3f			Hist1h3f
Gm42756			Gm42756			Gm42756			Gm42756			Gm42756			Gm42756			Gm42756			Hist1h3d			Gm42756			Gm42756			Gm42756			Gm42756
Gm43398			Gm43398			Gm43398			Gm43398			Gm43398			Gm43398			Gm43398			Hist1h3f			Gm43398			Gm43398			Gm43398			Gm43398
Olfr316			Olfr316			Olfr316			Olfr316			Olfr316			Olfr316			Olfr316			Gm42756			Olfr316			Olfr316			Olfr316			Olfr316
B230209E15Rik			B230209E15Rik			B230209E15Rik			B230209E15Rik			B230209E15Rik			B230209E15Rik			B230209E15Rik			Gm43398			B230209E15Rik			B230209E15Rik			B230209E15Rik			B230209E15Rik
Gm4900			Gm4900			Gm4900			Gm4900			Gm4900			Gm4900			Gm4900			Olfr316			Gm4900			Gm4900			Gm4900			Gm4900
AC165278.1			AC165278.1			AC165278.1			AC165278.1			AC165278.1			AC165278.1			AC165278.1			B230209E15Rik			AC165278.1			AC165278.1			AC165278.1			AC165278.1
AC156026.1			AC156026.1			AC156026.1			AC156026.1			AC156026.1			AC156026.1			AC156026.1			Gm4900			AC156026.1			AC156026.1			AC156026.1			AC156026.1
4933432I09Rik			4933432I09Rik			4933432I09Rik			4933432I09Rik			4933432I09Rik			4933432I09Rik			4933432I09Rik			AC165278.1			4933432I09Rik			4933432I09Rik			4933432I09Rik			4933432I09Rik
Cbln2			Cbln2			Cbln2			Cbln2			Cbln2			Cbln2			Cbln2			AC156026.1			Cbln2			Cbln2			Cbln2			Cbln2
Agap2			Agap2			Agap2			Agap2			Agap2			Agap2			Agap2			4933432I09Rik			Agap2			Agap2			Agap2			Agap2
Fscn1			Fscn1			Fscn1			Fscn1			Fscn1			Fscn1			Fscn1			Cbln2			Fscn1			Fscn1			Fscn1			Fscn1
Eln			Eln			Eln			Eln			Eln			Eln			Eln			Agap2			Eln			Eln			Eln			Eln
Adra2a			Adra2a			Adra2a			Adra2a			Adra2a			Adra2a			Adra2a			Fscn1			Adra2a			Adra2a			Adra2a			Adra2a
Nrsn2			Nrsn2			Nrsn2			Nrsn2			Nrsn2			Nrsn2			Nrsn2			Eln			Nrsn2			Nrsn2			Nrsn2			Nrsn2
Zfp575			Zfp575			Zfp575			Zfp575			Zfp575			Zfp575			Zfp575			Adra2a			Zfp575			Zfp575			Zfp575			Zfp575
Fjx1			Fjx1			Fjx1			Fjx1			Fjx1			Fjx1			Fjx1			Nrsn2			Fjx1			Fjx1			Fjx1			Fjx1
Gm26901			Gm26901			Gm26901			Gm26901			Gm26901			Gm26901			Gm26901			Zfp575			Gm26901			Gm26901			Gm26901			Gm26901
Casp1			Casp1			Casp1			Casp1			Casp1			Casp1			Casp1			Fjx1			Casp1			Casp1			Casp1			Casp1
Ccdc3			Ccdc3			Ccdc3			Ccdc3			Ccdc3			Ccdc3			Ccdc3			Gm26901			Ccdc3			Ccdc3			Ccdc3			Ccdc3
Tceal6			Tceal6			Tceal6			Tceal6			Tceal6			Tceal6			Tceal6			Casp1			Tceal6			Tceal6			Tceal6			Tceal6
Asb16			Asb16			Asb16			Asb16			Asb16			Asb16			Asb16			Ccdc3			Asb16			Asb16			Asb16			Asb16
Vstm2l			Vstm2l			Vstm2l			Vstm2l			Vstm2l			Vstm2l			Vstm2l			Tceal6			Vstm2l			Vstm2l			Vstm2l			Vstm2l
Chrm4			Chrm4			Chrm4			Chrm4			Chrm4			Chrm4			Chrm4			Asb16			Chrm4			Chrm4			Chrm4			Chrm4
Btaf1			Btaf1			Btaf1			Btaf1			Btaf1			Btaf1			Btaf1			Vstm2l			Btaf1			Btaf1			Btaf1			Btaf1
Adra2c			Adra2c			Adra2c			Adra2c			Adra2c			Adra2c			Adra2c			Chrm4			Adra2c			Adra2c			Adra2c			Adra2c
Prrg1			Prrg1			Prrg1			Prrg1			Prrg1			Prrg1			Prrg1			Btaf1			Prrg1			Prrg1			Prrg1			Prrg1
Sertm1			Sertm1			Sertm1			Sertm1			Sertm1			Sertm1			Sertm1			Adra2c			Sertm1			Sertm1			Sertm1			Sertm1
Nap1l2			Nap1l2			Nap1l2			Nap1l2			Nap1l2			Nap1l2			Nap1l2			Prrg1			Nap1l2			Nap1l2			Nap1l2			Nap1l2
Gm21887			Gm21887			Gm21887			Gm21887			Gm21887			Gm21887			Gm21887			Sertm1			Gm21887			Gm21887			Gm21887			Gm21887
A230001M10Rik			A230001M10Rik			A230001M10Rik			A230001M10Rik			A230001M10Rik			A230001M10Rik			A230001M10Rik			Nap1l2			A230001M10Rik			A230001M10Rik			A230001M10Rik			A230001M10Rik
Angptl4			Angptl4			Angptl4			Angptl4			Angptl4			Angptl4			Angptl4			Gm21887			Angptl4			Angptl4			Angptl4			Angptl4
Flt1			Flt1			Flt1			Flt1			Flt1			Flt1			Flt1			A230001M10Rik			Flt1			Flt1			Flt1			Flt1
Trim59			Trim59			Trim59			Trim59			Trim59			Trim59			Trim59			Angptl4			Trim59			Trim59			Trim59			Trim59
B230312C02Rik			B230312C02Rik			B230312C02Rik			B230312C02Rik			B230312C02Rik			B230312C02Rik			B230312C02Rik			Flt1			B230312C02Rik			B230312C02Rik			B230312C02Rik			B230312C02Rik
Gm18783			Gm18783			Gm18783			Gm18783			Gm18783			Gm18783			Gm18783			Trim59			Gm18783			Gm18783			Gm18783			Gm18783
Fgfbp3			Fgfbp3			Fgfbp3			Fgfbp3			Fgfbp3			Fgfbp3			Fgfbp3			B230312C02Rik			Fgfbp3			Fgfbp3			Fgfbp3			Fgfbp3
Mocs3			Mocs3			Mocs3			Mocs3			Mocs3			Mocs3			Mocs3			Gm18783			Mocs3			Mocs3			Mocs3			Mocs3
Ace			Ace			Ace			Ace			Ace			Ace			Ace			Fgfbp3			Ace			Ace			Ace			Ace
Flywch2			Flywch2			Flywch2			Flywch2			Flywch2			Flywch2			Flywch2			Mocs3			Flywch2			Flywch2			Flywch2			Flywch2
Vgf			Vgf			Vgf			Vgf			Vgf			Vgf			Vgf			Ace			Vgf			Vgf			Vgf			Vgf
Nol4			Nol4			Nol4			Nol4			Nol4			Nol4			Nol4			Flywch2			Nol4			Nol4			Nol4			Nol4
Cdh22			Cdh22			Cdh22			Cdh22			Cdh22			Cdh22			Cdh22			Vgf			Cdh22			Cdh22			Cdh22			Cdh22
Ddn			Ddn			Ddn			Ddn			Ddn			Ddn			Ddn			Nol4			Ddn			Ddn			Ddn			Ddn
Ccnd1			Ccnd1			Ccnd1			Ccnd1			Ccnd1			Ccnd1			Ccnd1			Cdh22			Ccnd1			Ccnd1			Ccnd1			Ccnd1
Hr			Hr			Hr			Hr			Hr			Hr			Hr			Ddn			Hr			Hr			Hr			Hr
Emid1			Emid1			Emid1			Emid1			Emid1			Emid1			Emid1			Ccnd1			Emid1			Emid1			Emid1			Emid1
Atp6v1g1			Atp6v1g1			Atp6v1g1			Atp6v1g1			Atp6v1g1			Atp6v1g1			Atp6v1g1			Hr			Atp6v1g1			Atp6v1g1			Atp6v1g1			Atp6v1g1
Kcnj12			Kcnj12			Kcnj12			Kcnj12			Kcnj12			Kcnj12			Kcnj12			Emid1			Kcnj12			Kcnj12			Kcnj12			Kcnj12
Foxc1			Foxc1			Foxc1			Foxc1			Foxc1			Foxc1			Foxc1			Atp6v1g1			Foxc1			Foxc1			Foxc1			Foxc1
Fhad1			Fhad1			Fhad1			Fhad1			Fhad1			Fhad1			Fhad1			Kcnj12			Fhad1			Fhad1			Fhad1			Fhad1
C1ra			C1ra			C1ra			C1ra			C1ra			C1ra			C1ra			Foxc1			C1ra			C1ra			C1ra			C1ra
Hist1h2ab			Hist1h2ab			Hist1h2ab			Hist1h2ab			Hist1h2ab			Hist1h2ab			Hist1h2ab			Fhad1			Hist1h2ab			Hist1h2ab			Hist1h2ab			Hist1h2ab
Hist1h3e			Hist1h3e			Hist1h3e			Hist1h3e			Hist1h3e			Hist1h3e			Hist1h3e			C1ra			Hist1h3e			Hist1h3e			Hist1h3e			Hist1h3e
Fzd10			Fzd10			Fzd10			Fzd10			Fzd10			Fzd10			Fzd10			Hist1h2ab			Fzd10			Fzd10			Fzd10			Fzd10
Kazald1			Kazald1			Kazald1			Kazald1			Kazald1			Kazald1			Kazald1			Hist1h3e			Kazald1			Kazald1			Kazald1			Kazald1
Icam5			Icam5			Icam5			Icam5			Icam5			Icam5			Icam5			Fzd10			Icam5			Icam5			Icam5			Icam5
Wfs1			Wfs1			Wfs1			Wfs1			Wfs1			Wfs1			Wfs1			Kazald1			Wfs1			Wfs1			Wfs1			Wfs1
Entpd3			Entpd3			Entpd3			Entpd3			Entpd3			Entpd3			Entpd3			Icam5			Entpd3			Entpd3			Entpd3			Entpd3
Hist1h3h			Hist1h3h			Hist1h3h			Hist1h3h			Hist1h3h			Hist1h3h			Hist1h3h			Wfs1			Hist1h3h			Hist1h3h			Hist1h3h			Hist1h3h
Bbc3			Bbc3			Bbc3			Bbc3			Bbc3			Bbc3			Bbc3			Entpd3			Bbc3			Bbc3			Bbc3			Bbc3
Cybrd1			Cybrd1			Cybrd1			Cybrd1			Cybrd1			Cybrd1			Cybrd1			Hist1h3h			Cybrd1			Cybrd1			Cybrd1			Cybrd1
5330434G04Rik			5330434G04Rik			5330434G04Rik			5330434G04Rik			5330434G04Rik			5330434G04Rik			5330434G04Rik			Bbc3			5330434G04Rik			5330434G04Rik			5330434G04Rik			5330434G04Rik
Gm44644			Gm44644			Gm44644			Gm44644			Gm44644			Gm44644			Gm44644			Cybrd1			Gm44644			Gm44644			Gm44644			Gm44644
Pnck			Pnck			Pnck			Pnck			Pnck			Pnck			Pnck			5330434G04Rik			Pnck			Pnck			Pnck			Pnck
Plekhg4			Plekhg4			Plekhg4			Plekhg4			Plekhg4			Plekhg4			Plekhg4			Gm44644			Plekhg4			Plekhg4			Plekhg4			Plekhg4
Lcn2			Lcn2			Lcn2			Lcn2			Lcn2			Lcn2			Lcn2			Pnck			Lcn2			Lcn2			Lcn2			Lcn2
Pglyrp1			Pglyrp1			Pglyrp1			Pglyrp1			Pglyrp1			Pglyrp1			Pglyrp1			Plekhg4			Pglyrp1			Pglyrp1			Pglyrp1			Pglyrp1
Cd209a			Cd209a			Cd209a			Cd209a			Cd209a			Cd209a			Cd209a			Lcn2			Cd209a			Cd209a			Cd209a			Cd209a
Cspg4			Cspg4			Cspg4			Cspg4			Cspg4			Cspg4			Cspg4			Pglyrp1			Cspg4			Cspg4			Cspg4			Cspg4
Cirbp			Cirbp			Cirbp			Cirbp			Cirbp			Cirbp			Cirbp			Cd209a			Cirbp			Cirbp			Cirbp			Cirbp
Nectin4			Nectin4			Nectin4			Nectin4			Nectin4			Nectin4			Nectin4			Cspg4			Nectin4			Nectin4			Nectin4			Nectin4
Kcnq4			Kcnq4			Kcnq4			Kcnq4			Kcnq4			Kcnq4			Kcnq4			Cirbp			Kcnq4			Kcnq4			Kcnq4			Kcnq4
Cend1			Cend1			Cend1			Cend1			Cend1			Cend1			Cend1			Nectin4			Cend1			Cend1			Cend1			Cend1
Plppr4			Plppr4			Plppr4			Plppr4			Plppr4			Plppr4			Plppr4			Kcnq4			Plppr4			Plppr4			Plppr4			Plppr4
Lrrc3			Lrrc3			Lrrc3			Lrrc3			Lrrc3			Lrrc3			Lrrc3			Cend1			Lrrc3			Lrrc3			Lrrc3			Lrrc3
Sh2d4b			Sh2d4b			Sh2d4b			Sh2d4b			Sh2d4b			Sh2d4b			Sh2d4b			Plppr4			Sh2d4b			Sh2d4b			Sh2d4b			Sh2d4b
Stard4			Stard4			Stard4			Stard4			Stard4			Stard4			Stard4			Lrrc3			Stard4			Stard4			Stard4			Stard4
Prmt8			Prmt8			Prmt8			Prmt8			Prmt8			Prmt8			Prmt8			Sh2d4b			Prmt8			Prmt8			Prmt8			Prmt8
Rit2			Rit2			Rit2			Rit2			Rit2			Rit2			Rit2			Stard4			Rit2			Rit2			Rit2			Rit2
Syt13			Syt13			Syt13			Syt13			Syt13			Syt13			Syt13			Prmt8			Syt13			Syt13			Syt13			Syt13
Bhlhe41			Bhlhe41			Bhlhe41			Bhlhe41			Bhlhe41			Bhlhe41			Bhlhe41			Rit2			Bhlhe41			Bhlhe41			Bhlhe41			Bhlhe41
Wbp2			Wbp2			Wbp2			Wbp2			Wbp2			Wbp2			Wbp2			Syt13			Wbp2			Wbp2			Wbp2			Wbp2
Chst11			Chst11			Chst11			Chst11			Chst11			Chst11			Chst11			Bhlhe41			Chst11			Chst11			Chst11			Chst11
Hrh3			Hrh3			Hrh3			Hrh3			Hrh3			Hrh3			Hrh3			Wbp2			Hrh3			Hrh3			Hrh3			Hrh3
Gm17322			Gm17322			Gm17322			Gm17322			Gm17322			Gm17322			Gm17322			Chst11			Gm17322			Gm17322			Gm17322			Gm17322
Mgat4b			Mgat4b			Mgat4b			Mgat4b			Mgat4b			Mgat4b			Mgat4b			Hrh3			Mgat4b			Mgat4b			Mgat4b			Mgat4b
Apol8			Apol8			Apol8			Apol8			Apol8			Apol8			Apol8			Gm17322			Apol8			Apol8			Apol8			Apol8
Ncan			Ncan			Ncan			Ncan			Ncan			Ncan			Ncan			Mgat4b			Ncan			Ncan			Ncan			Ncan
Susd2			Susd2			Susd2			Susd2			Susd2			Susd2			Susd2			Apol8			Susd2			Susd2			Susd2			Susd2
Rfx3			Rfx3			Rfx3			Rfx3			Rfx3			Rfx3			Rfx3			Ncan			Rfx3			Rfx3			Rfx3			Rfx3
Myh11			Myh11			Myh11			Myh11			Myh11			Myh11			Myh11			Susd2			Myh11			Myh11			Myh11			Myh11
Cplx1			Cplx1			Cplx1			Cplx1			Cplx1			Cplx1			Cplx1			Rfx3			Cplx1			Cplx1			Cplx1			Cplx1
Prox1			Prox1			Prox1			Prox1			Prox1			Prox1			Prox1			Myh11			Prox1			Prox1			Prox1			Prox1
Olfml3			Olfml3			Olfml3			Olfml3			Olfml3			Olfml3			Olfml3			Cplx1			Olfml3			Olfml3			Olfml3			Olfml3
Tmem200c			Tmem200c			Tmem200c			Tmem200c			Tmem200c			Tmem200c			Tmem200c			Prox1			Tmem200c			Tmem200c			Tmem200c			Tmem200c
Pcdhb9			Pcdhb9			Pcdhb9			Pcdhb9			Pcdhb9			Pcdhb9			Pcdhb9			Olfml3			Pcdhb9			Pcdhb9			Pcdhb9			Pcdhb9
CT009510.2			CT009510.2			CT009510.2			CT009510.2			CT009510.2			CT009510.2			CT009510.2			Tmem200c			CT009510.2			CT009510.2			CT009510.2			CT009510.2
Pcdhga2			Pcdhga2			Pcdhga2			Pcdhga2			Pcdhga2			Pcdhga2			Pcdhga2			Pcdhb9			Pcdhga2			Pcdhga2			Pcdhga2			Pcdhga2
Obox3-ps7			Obox3-ps7			Obox3-ps7			Obox3-ps7			Obox3-ps7			Obox3-ps7			Obox3-ps7			CT009510.2			Obox3-ps7			Obox3-ps7			Obox3-ps7			Obox3-ps7
Pcdhb2			Pcdhb2			Pcdhb2			Pcdhb2			Pcdhb2			Pcdhb2			Pcdhb2			Pcdhga2			Pcdhb2			Pcdhb2			Pcdhb2			Pcdhb2
Pcdhb3			Pcdhb3			Pcdhb3			Pcdhb3			Pcdhb3			Pcdhb3			Pcdhb3			Obox3-ps7			Pcdhb3			Pcdhb3			Pcdhb3			Pcdhb3
Pcdhga6			Pcdhga6			Pcdhga6			Pcdhga6			Pcdhga6			Pcdhga6			Pcdhga6			Pcdhb2			Pcdhga6			Pcdhga6			Pcdhga6			Pcdhga6
Vmn1r90			Vmn1r90			Vmn1r90			Vmn1r90			Vmn1r90			Vmn1r90			Vmn1r90			Pcdhb3			Vmn1r90			Vmn1r90			Vmn1r90			Vmn1r90
Gm35161			Gm35161			Gm35161			Gm35161			Gm35161			Gm35161			Gm35161			Pcdhga6			Gm35161			Gm35161			Gm35161			Gm35161
Slc38a5			Slc38a5			Slc38a5			Slc38a5			Slc38a5			Slc38a5			Slc38a5			Vmn1r90			Slc38a5			Slc38a5			Slc38a5			Slc38a5
Nr1d1			Nr1d1			Nr1d1			Nr1d1			Nr1d1			Nr1d1			Nr1d1			Gm35161			Nr1d1			Nr1d1			Nr1d1			Nr1d1
Pcdhb8			Pcdhb8			Pcdhb8			Pcdhb8			Pcdhb8			Pcdhb8			Pcdhb8			Slc38a5			Pcdhb8			Pcdhb8			Pcdhb8			Pcdhb8
Fbn2			Fbn2			Fbn2			Fbn2			Fbn2			Fbn2			Fbn2			Nr1d1			Fbn2			Fbn2			Fbn2			Fbn2
Cyp11a1			Cyp11a1			Cyp11a1			Cyp11a1			Cyp11a1			Cyp11a1			Cyp11a1			Pcdhb8			Cyp11a1			Cyp11a1			Cyp11a1			Cyp11a1
Gpr25			Gpr25			Gpr25			Gpr25			Gpr25			Gpr25			Gpr25			Fbn2			Gpr25			Gpr25			Gpr25			Gpr25
Top2a			Top2a			Top2a			Top2a			Top2a			Top2a			Top2a			Cyp11a1			Top2a			Top2a			Top2a			Top2a
Gm16233			Gm16233			Gm16233			Gm16233			Gm16233			Gm16233			Gm16233			Gpr25			Gm16233			Gm16233			Gm16233			Gm16233
Gm16505			Gm16505			Gm16505			Gm16505			Gm16505			Gm16505			Gm16505			Top2a			Gm16505			Gm16505			Gm16505			Gm16505
Syt2			Syt2			Syt2			Syt2			Syt2			Syt2			Syt2			Gm16233			Syt2			Syt2			Syt2			Syt2
Slco1b2			Slco1b2			Slco1b2			Slco1b2			Slco1b2			Slco1b2			Slco1b2			Gm16505			Slco1b2			Slco1b2			Slco1b2			Slco1b2
Nrxn2			Nrxn2			Nrxn2			Nrxn2			Nrxn2			Nrxn2			Nrxn2			Syt2			Nrxn2			Nrxn2			Nrxn2			Nrxn2
Pcdhga8			Pcdhga8			Pcdhga8			Pcdhga8			Pcdhga8			Pcdhga8			Pcdhga8			Slco1b2			Pcdhga8			Pcdhga8			Pcdhga8			Pcdhga8
Pcdhb6			Pcdhb6			Pcdhb6			Pcdhb6			Pcdhb6			Pcdhb6			Pcdhb6			Nrxn2			Pcdhb6			Pcdhb6			Pcdhb6			Pcdhb6
Hspg2			Hspg2			Hspg2			Hspg2			Hspg2			Hspg2			Hspg2			Pcdhga8			Hspg2			Hspg2			Hspg2			Hspg2
Pcdhb4			Pcdhb4			Pcdhb4			Pcdhb4			Pcdhb4			Pcdhb4			Pcdhb4			Pcdhb6			Pcdhb4			Pcdhb4			Pcdhb4			Pcdhb4
C230034O21Rik			C230034O21Rik			C230034O21Rik			C230034O21Rik			C230034O21Rik			C230034O21Rik			C230034O21Rik			Hspg2			C230034O21Rik			C230034O21Rik			C230034O21Rik			C230034O21Rik
Pla2g16			Pla2g16			Pla2g16			Pla2g16			Pla2g16			Pla2g16			Pla2g16			Pcdhb4			Pla2g16			Pla2g16			Pla2g16			Pla2g16
Pde3a			Pde3a			Pde3a			Pde3a			Pde3a			Pde3a			Pde3a			C230034O21Rik			Pde3a			Pde3a			Pde3a			Pde3a
unnamed_miRNA			unnamed_miRNA			unnamed_miRNA			unnamed_miRNA			unnamed_miRNA			unnamed_miRNA			unnamed_miRNA			Pla2g16			unnamed_miRNA			unnamed_miRNA			unnamed_miRNA			unnamed_miRNA
Pcdhb11			Pcdhb11			Pcdhb11			Pcdhb11			Pcdhb11			Pcdhb11			Pcdhb11			Pde3a			Pcdhb11			Pcdhb11			Pcdhb11			Pcdhb11
Abhd17a			Abhd17a			Abhd17a			Abhd17a			Abhd17a			Abhd17a			Abhd17a			unnamed_miRNA			Abhd17a			Abhd17a			Abhd17a			Abhd17a
Gm18529			Gm18529			Gm18529			Gm18529			Gm18529			Gm18529			Gm18529			Pcdhb11			Gm18529			Gm18529			Gm18529			Gm18529
Rbm3			Rbm3			Rbm3			Rbm3			Rbm3			Rbm3			Rbm3			Abhd17a			Rbm3			Rbm3			Rbm3			Rbm3
Fam171a2			Fam171a2			Fam171a2			Fam171a2			Fam171a2			Fam171a2			Fam171a2			Gm18529			Fam171a2			Fam171a2			Fam171a2			Fam171a2
Itih3			Itih3			Itih3			Itih3			Itih3			Itih3			Itih3			Rbm3			Itih3			Itih3			Itih3			Itih3
H2-T22			H2-T22			H2-T22			H2-T22			H2-T22			H2-T22			H2-T22			Fam171a2			H2-T22			H2-T22			H2-T22			H2-T22
Pcdhb5			Pcdhb5			Pcdhb5			Pcdhb5			Pcdhb5			Pcdhb5			Pcdhb5			Itih3			Pcdhb5			Pcdhb5			Pcdhb5			Pcdhb5
Pcdhb13			Pcdhb13			Pcdhb13			Pcdhb13			Pcdhb13			Pcdhb13			Pcdhb13			H2-T22			Pcdhb13			Pcdhb13			Pcdhb13			Pcdhb13
Lingo2			Lingo2			Lingo2			Lingo2			Lingo2			Lingo2			Lingo2			Pcdhb5			Lingo2			Lingo2			Lingo2			Lingo2
Gm16083			Gm16083			Gm16083			Gm16083			Gm16083			Gm16083			Gm16083			Pcdhb13			Gm16083			Gm16083			Gm16083			Gm16083
Nbl1			Nbl1			Nbl1			Nbl1			Nbl1			Nbl1			Nbl1			Lingo2			Nbl1			Nbl1			Nbl1			Nbl1
Nptxr			Nptxr			Nptxr			Nptxr			Nptxr			Nptxr			Nptxr			Gm16083			Nptxr			Nptxr			Nptxr			Nptxr
Klhl33			Klhl33			Klhl33			Klhl33			Klhl33			Klhl33			Klhl33			Nbl1			Klhl33			Klhl33			Klhl33			Klhl33
Gpr26			Gpr26			Gpr26			Gpr26			Gpr26			Gpr26			Gpr26			Nptxr			Gpr26			Gpr26			Gpr26			Gpr26
Jak3			Jak3			Jak3			Jak3			Jak3			Jak3			Jak3			Klhl33			Jak3			Jak3			Jak3			Jak3
AC154636.1			AC154636.1			AC154636.1			AC154636.1			AC154636.1			AC154636.1			AC154636.1			Gpr26			AC154636.1			AC154636.1			AC154636.1			AC154636.1
Gm16299			Gm16299			Gm16299			Gm16299			Gm16299			Gm16299			Gm16299			Jak3			Gm16299			Gm16299			Gm16299			Gm16299
B3galt5			B3galt5			B3galt5			B3galt5			B3galt5			B3galt5			B3galt5			AC154636.1			B3galt5			B3galt5			B3galt5			B3galt5
Gas2l1			Gas2l1			Gas2l1			Gas2l1			Gas2l1			Gas2l1			Gas2l1			Gm16299			Gas2l1			Gas2l1			Gas2l1			Gas2l1
Gm11175			Gm11175			Gm11175			Gm11175			Gm11175			Gm11175			Gm11175			B3galt5			Gm11175			Gm11175			Gm11175			Gm11175
6530403H02Rik			6530403H02Rik			6530403H02Rik			6530403H02Rik			6530403H02Rik			6530403H02Rik			6530403H02Rik			Gas2l1			6530403H02Rik			6530403H02Rik			6530403H02Rik			6530403H02Rik
Gm10754			Gm10754			Gm10754			Gm10754			Gm10754			Gm10754			Gm10754			Gm11175			Gm10754			Gm10754			Gm10754			Gm10754
Zfp580			Zfp580			Zfp580			Zfp580			Zfp580			Zfp580			Zfp580			6530403H02Rik			Zfp580			Zfp580			Zfp580			Zfp580
Ezh1			Ezh1			Ezh1			Ezh1			Ezh1			Ezh1			Ezh1			Gm10754			Ezh1			Ezh1			Ezh1			Ezh1
Gm40331			Gm40331			Gm40331			Gm40331			Gm40331			Gm40331			Gm40331			Zfp580			Gm40331			Gm40331			Gm40331			Gm40331
Col1a2			Col1a2			Col1a2			Col1a2			Col1a2			Col1a2			Col1a2			Ezh1			Col1a2			Col1a2			Col1a2			Col1a2
Pnkd			Pnkd			Pnkd			Pnkd			Pnkd			Pnkd			Pnkd			Gm40331			Pnkd			Pnkd			Pnkd			Pnkd
Acp7			Acp7			Acp7			Acp7			Acp7			Acp7			Acp7			Col1a2			Acp7			Acp7			Acp7			Acp7
Gm9954			Gm9954			Gm9954			Gm9954			Gm9954			Gm9954			Gm9954			Pnkd			Gm9954			Gm9954			Gm9954			Gm9954
A330015K06Rik			A330015K06Rik			A330015K06Rik			A330015K06Rik			A330015K06Rik			A330015K06Rik			A330015K06Rik			Acp7			A330015K06Rik			A330015K06Rik			A330015K06Rik			A330015K06Rik
Gm43566			Gm43566			Gm43566			Gm43566			Gm43566			Gm43566			Gm43566			Gm9954			Gm43566			Gm43566			Gm43566			Gm43566
Adnp			Adnp			Adnp			Adnp			Adnp			Adnp			Adnp			A330015K06Rik			Adnp			Adnp			Adnp			Adnp
Impg2			Impg2			Impg2			Impg2			Impg2			Impg2			Impg2			Gm43566			Impg2			Impg2			Impg2			Impg2
Cdk6			Cdk6			Cdk6			Cdk6			Cdk6			Cdk6			Cdk6			Adnp			Cdk6			Cdk6			Cdk6			Cdk6
Sytl1			Sytl1			Sytl1			Sytl1			Sytl1			Sytl1			Sytl1			Impg2			Sytl1			Sytl1			Sytl1			Sytl1
Grin2b			Grin2b			Grin2b			Grin2b			Grin2b			Grin2b			Grin2b			Cdk6			Grin2b			Grin2b			Grin2b			Grin2b
Nr2f6			Nr2f6			Nr2f6			Nr2f6			Nr2f6			Nr2f6			Nr2f6			Sytl1			Nr2f6			Nr2f6			Nr2f6			Nr2f6
Col5a2			Col5a2			Col5a2			Col5a2			Col5a2			Col5a2			Col5a2			Grin2b			Col5a2			Col5a2			Col5a2			Col5a2
Fam19a1			Fam19a1			Fam19a1			Fam19a1			Fam19a1			Fam19a1			Fam19a1			Nr2f6			Fam19a1			Fam19a1			Fam19a1			Fam19a1
Nr3c2			Nr3c2			Nr3c2			Nr3c2			Nr3c2			Nr3c2			Nr3c2			Col5a2			Nr3c2			Nr3c2			Nr3c2			Nr3c2
Deptor			Deptor			Deptor			Deptor			Deptor			Deptor			Deptor			Fam19a1			Deptor			Deptor			Deptor			Deptor
D7Ertd443e			D7Ertd443e			D7Ertd443e			D7Ertd443e			D7Ertd443e			D7Ertd443e			D7Ertd443e			Nr3c2			D7Ertd443e			D7Ertd443e			D7Ertd443e			D7Ertd443e
2310002F09Rik			2310002F09Rik			2310002F09Rik			2310002F09Rik			2310002F09Rik			2310002F09Rik			2310002F09Rik			Deptor			2310002F09Rik			2310002F09Rik			2310002F09Rik			2310002F09Rik
Gm48488			Gm48488			Gm48488			Gm48488			Gm48488			Gm48488			Gm48488			D7Ertd443e			Gm48488			Gm48488			Gm48488			Gm48488
Gm1673			Gm1673			Gm1673			Gm1673			Gm1673			Gm1673			Gm1673			2310002F09Rik			Gm1673			Gm1673			Gm1673			Gm1673
Fn1			Fn1			Fn1			Fn1			Fn1			Fn1			Fn1			Gm48488			Fn1			Fn1			Fn1			Fn1
Asah2			Asah2			Asah2			Asah2			Asah2			Asah2			Asah2			Gm1673			Asah2			Asah2			Asah2			Asah2
Gm10800			Gm10800			Gm10800			Gm10800			Gm10800			Gm10800			Gm10800			Fn1			Gm10800			Gm10800			Gm10800			Gm10800
Col2a1			Col2a1			Col2a1			Col2a1			Col2a1			Col2a1			Col2a1			Asah2			Col2a1			Col2a1			Col2a1			Col2a1
Nog			Nog			Nog			Nog			Nog			Nog			Nog			Gm10800			Nog			Nog			Nog			Nog
6330409D20Rik			6330409D20Rik			6330409D20Rik			6330409D20Rik			6330409D20Rik			6330409D20Rik			6330409D20Rik			Col2a1			6330409D20Rik			6330409D20Rik			6330409D20Rik			6330409D20Rik
2700081O15Rik			2700081O15Rik			2700081O15Rik			2700081O15Rik			2700081O15Rik			2700081O15Rik			2700081O15Rik			Nog			2700081O15Rik			2700081O15Rik			2700081O15Rik			2700081O15Rik
Glp2r			Glp2r			Glp2r			Glp2r			Glp2r			Glp2r			Glp2r			6330409D20Rik			Glp2r			Glp2r			Glp2r			Glp2r
Smyd3			Smyd3			Smyd3			Smyd3			Smyd3			Smyd3			Smyd3			2700081O15Rik			Smyd3			Smyd3			Smyd3			Smyd3
Rasgrf1			Rasgrf1			Rasgrf1			Rasgrf1			Rasgrf1			Rasgrf1			Rasgrf1			Glp2r			Rasgrf1			Rasgrf1			Rasgrf1			Rasgrf1
Stab1			Stab1			Stab1			Stab1			Stab1			Stab1			Stab1			Smyd3			Stab1			Stab1			Stab1			Stab1
Skap2			Skap2			Skap2			Skap2			Skap2			Skap2			Skap2			Rasgrf1			Skap2			Skap2			Skap2			Skap2
Sfmbt2			Sfmbt2			Sfmbt2			Sfmbt2			Sfmbt2			Sfmbt2			Sfmbt2			Stab1			Sfmbt2			Sfmbt2			Sfmbt2			Sfmbt2
St18			St18			St18			St18			St18			St18			St18			Skap2			St18			St18			St18			St18
Slc4a7			Slc4a7			Slc4a7			Slc4a7			Slc4a7			Slc4a7			Slc4a7			Sfmbt2			Slc4a7			Slc4a7			Slc4a7			Slc4a7
Tie1			Tie1			Tie1			Tie1			Tie1			Tie1			Tie1			St18			Tie1			Tie1			Tie1			Tie1
Zbbx			Zbbx			Zbbx			Zbbx			Zbbx			Zbbx			Zbbx			Slc4a7			Zbbx			Zbbx			Zbbx			Zbbx
Pcdhb14			Pcdhb14			Pcdhb14			Pcdhb14			Pcdhb14			Pcdhb14			Pcdhb14			Tie1			Pcdhb14			Pcdhb14			Pcdhb14			Pcdhb14
Tnc			Tnc			Tnc			Tnc			Tnc			Tnc			Tnc			Zbbx			Tnc			Tnc			Tnc			Tnc
Spink10			Spink10			Spink10			Spink10			Spink10			Spink10			Spink10			Pcdhb14			Spink10			Spink10			Spink10			Spink10
Prune2			Prune2			Prune2			Prune2			Prune2			Prune2			Prune2			Tnc			Prune2			Prune2			Prune2			Prune2
Cd38			Cd38			Cd38			Cd38			Cd38			Cd38			Cd38			Spink10			Cd38			Cd38			Cd38			Cd38
3222401L13Rik			3222401L13Rik			3222401L13Rik			3222401L13Rik			3222401L13Rik			3222401L13Rik			3222401L13Rik			Prune2			3222401L13Rik			3222401L13Rik			3222401L13Rik			3222401L13Rik
Itga1			Itga1			Itga1			Itga1			Itga1			Itga1			Itga1			Cd38			Itga1			Itga1			Itga1			Itga1
Rimklb			Rimklb			Rimklb			Rimklb			Rimklb			Rimklb			Rimklb			3222401L13Rik			Rimklb			Rimklb			Rimklb			Rimklb
Esr1			Esr1			Esr1			Esr1			Esr1			Esr1			Esr1			Itga1			Esr1			Esr1			Esr1			Esr1
Zfp579			Zfp579			Zfp579			Zfp579			Zfp579			Zfp579			Zfp579			Rimklb			Zfp579			Zfp579			Zfp579			Zfp579
Chmp4c			Chmp4c			Chmp4c			Chmp4c			Chmp4c			Chmp4c			Chmp4c			Esr1			Chmp4c			Chmp4c			Chmp4c			Chmp4c
Gm43210			Gm43210			Gm43210			Gm43210			Gm43210			Gm43210			Gm43210			Zfp579			Gm43210			Gm43210			Gm43210			Gm43210
Eng			Eng			Eng			Eng			Eng			Eng			Eng			Chmp4c			Eng			Eng			Eng			Eng
Rnpep			Rnpep			Rnpep			Rnpep			Rnpep			Rnpep			Rnpep			Gm43210			Rnpep			Rnpep			Rnpep			Rnpep
Atp10d			Atp10d			Atp10d			Atp10d			Atp10d			Atp10d			Atp10d			Eng			Atp10d			Atp10d			Atp10d			Atp10d
Gm22422			Gm22422			Gm22422			Gm22422			Gm22422			Gm22422			Gm22422			Rnpep			Gm22422			Gm22422			Gm22422			Gm22422
Brinp2			Brinp2			Brinp2			Brinp2			Brinp2			Brinp2			Brinp2			Atp10d			Brinp2			Brinp2			Brinp2			Brinp2
Rpe65			Rpe65			Rpe65			Rpe65			Rpe65			Rpe65			Rpe65			Gm22422			Rpe65			Rpe65			Rpe65			Rpe65
Cdh4			Cdh4			Cdh4			Cdh4			Cdh4			Cdh4			Cdh4			Brinp2			Cdh4			Cdh4			Cdh4			Cdh4
Olfr878			Olfr878			Olfr878			Olfr878			Olfr878			Olfr878			Olfr878			Rpe65			Olfr878			Olfr878			Olfr878			Olfr878
Notch4			Notch4			Notch4			Notch4			Notch4			Notch4			Notch4			Cdh4			Notch4			Notch4			Notch4			Notch4
Exoc3l4			Exoc3l4			Exoc3l4			Exoc3l4			Exoc3l4			Exoc3l4			Exoc3l4			Olfr878			Exoc3l4			Exoc3l4			Exoc3l4			Exoc3l4
Ppfibp1			Ppfibp1			Ppfibp1			Ppfibp1			Ppfibp1			Ppfibp1			Ppfibp1			Notch4			Ppfibp1			Ppfibp1			Ppfibp1			Ppfibp1
Slc29a4			Slc29a4			Slc29a4			Slc29a4			Slc29a4			Slc29a4			Slc29a4			Exoc3l4			Slc29a4			Slc29a4			Slc29a4			Slc29a4
Ppl			Ppl			Ppl			Ppl			Ppl			Ppl			Ppl			Ppfibp1			Ppl			Ppl			Ppl			Ppl
Dact3			Dact3			Dact3			Dact3			Dact3			Dact3			Dact3			Slc29a4			Dact3			Dact3			Dact3			Dact3
Cast			Cast			Cast			Cast			Cast			Cast			Cast			Ppl			Cast			Cast			Cast			Cast
Spef2			Spef2			Spef2			Spef2			Spef2			Spef2			Spef2			Dact3			Spef2			Spef2			Spef2			Spef2
Zfp428			Zfp428			Zfp428			Zfp428			Zfp428			Zfp428			Zfp428			Cast			Zfp428			Zfp428			Zfp428			Zfp428
Batf3			Batf3			Batf3			Batf3			Batf3			Batf3			Batf3			Spef2			Batf3			Batf3			Batf3			Batf3
Nova1			Nova1			Nova1			Nova1			Nova1			Nova1			Nova1			Zfp428			Nova1			Nova1			Nova1			Nova1
Map7d2			Map7d2			Map7d2			Map7d2			Map7d2			Map7d2			Map7d2			Batf3			Map7d2			Map7d2			Map7d2			Map7d2
A930017K11Rik			A930017K11Rik			A930017K11Rik			A930017K11Rik			A930017K11Rik			A930017K11Rik			A930017K11Rik			Nova1			A930017K11Rik			A930017K11Rik			A930017K11Rik			A930017K11Rik
Grid2ip			Grid2ip			Grid2ip			Grid2ip			Grid2ip			Grid2ip			Grid2ip			Map7d2			Grid2ip			Grid2ip			Grid2ip			Grid2ip
Gm5546			Gm5546			Gm5546			Gm5546			Gm5546			Gm5546			Gm5546			A930017K11Rik			Gm5546			Gm5546			Gm5546			Gm5546
Ptprf			Ptprf			Ptprf			Ptprf			Ptprf			Ptprf			Ptprf			Grid2ip			Ptprf			Ptprf			Ptprf			Ptprf
Zc3hav1			Zc3hav1			Zc3hav1			Zc3hav1			Zc3hav1			Zc3hav1			Zc3hav1			Gm5546			Zc3hav1			Zc3hav1			Zc3hav1			Zc3hav1
Spi1			Spi1			Spi1			Spi1			Spi1			Spi1			Spi1			Ptprf			Spi1			Spi1			Spi1			Spi1
Igf2			Igf2			Igf2			Igf2			Igf2			Igf2			Igf2			Zc3hav1			Igf2			Igf2			Igf2			Igf2
Cacna1c			Cacna1c			Cacna1c			Cacna1c			Cacna1c			Cacna1c			Cacna1c			Spi1			Cacna1c			Cacna1c			Cacna1c			Cacna1c
Tle3			Tle3			Tle3			Tle3			Tle3			Tle3			Tle3			Igf2			Tle3			Tle3			Tle3			Tle3
Pcdhgc5			Pcdhgc5			Pcdhgc5			Pcdhgc5			Pcdhgc5			Pcdhgc5			Pcdhgc5			Cacna1c			Pcdhgc5			Pcdhgc5			Pcdhgc5			Pcdhgc5
Igsf3			Igsf3			Igsf3			Igsf3			Igsf3			Igsf3			Igsf3			Tle3			Igsf3			Igsf3			Igsf3			Igsf3
Actn1			Actn1			Actn1			Actn1			Actn1			Actn1			Actn1			Pcdhgc5			Actn1			Actn1			Actn1			Actn1
Tmem158			Tmem158			Tmem158			Tmem158			Tmem158			Tmem158			Tmem158			Igsf3			Tmem158			Tmem158			Tmem158			Tmem158
Igfbp7			Igfbp7			Igfbp7			Igfbp7			Igfbp7			Igfbp7			Igfbp7			Actn1			Igfbp7			Igfbp7			Igfbp7			Igfbp7
B230206L02Rik			B230206L02Rik			B230206L02Rik			B230206L02Rik			B230206L02Rik			B230206L02Rik			B230206L02Rik			Tmem158			B230206L02Rik			B230206L02Rik			B230206L02Rik			B230206L02Rik
Ky			Ky			Ky			Ky			Ky			Ky			Ky			Igfbp7			Ky			Ky			Ky			Ky
Cmya5			Cmya5			Cmya5			Cmya5			Cmya5			Cmya5			Cmya5			B230206L02Rik			Cmya5			Cmya5			Cmya5			Cmya5
St8sia5			St8sia5			St8sia5			St8sia5			St8sia5			St8sia5			St8sia5			Ky			St8sia5			St8sia5			St8sia5			St8sia5
Fmn1			Fmn1			Fmn1			Fmn1			Fmn1			Fmn1			Fmn1			Cmya5			Fmn1			Fmn1			Fmn1			Fmn1
Pcdhb12			Pcdhb12			Pcdhb12			Pcdhb12			Pcdhb12			Pcdhb12			Pcdhb12			St8sia5			Pcdhb12			Pcdhb12			Pcdhb12			Pcdhb12
Gprasp2			Gprasp2			Gprasp2			Gprasp2			Gprasp2			Gprasp2			Gprasp2			Fmn1			Gprasp2			Gprasp2			Gprasp2			Gprasp2
Cbx7			Cbx7			Cbx7			Cbx7			Cbx7			Cbx7			Cbx7			Pcdhb12			Cbx7			Cbx7			Cbx7			Cbx7
Wscd2			Wscd2			Wscd2			Wscd2			Wscd2			Wscd2			Wscd2			Gprasp2			Wscd2			Wscd2			Wscd2			Wscd2
Jph4			Jph4			Jph4			Jph4			Jph4			Jph4			Jph4			Cbx7			Jph4			Jph4			Jph4			Jph4
Adgra3			Adgra3			Adgra3			Adgra3			Adgra3			Adgra3			Adgra3			Wscd2			Adgra3			Adgra3			Adgra3			Adgra3
6330403L08Rik			6330403L08Rik			6330403L08Rik			6330403L08Rik			6330403L08Rik			6330403L08Rik			6330403L08Rik			Jph4			6330403L08Rik			6330403L08Rik			6330403L08Rik			6330403L08Rik
Robo4			Robo4			Robo4			Robo4			Robo4			Robo4			Robo4			Adgra3			Robo4			Robo4			Robo4			Robo4
Begain			Begain			Begain			Begain			Begain			Begain			Begain			6330403L08Rik			Begain			Begain			Begain			Begain
Armcx1			Armcx1			Armcx1			Armcx1			Armcx1			Armcx1			Armcx1			Robo4			Armcx1			Armcx1			Armcx1			Armcx1
Slit2			Slit2			Slit2			Slit2			Slit2			Slit2			Slit2			Begain			Slit2			Slit2			Slit2			Slit2
Pink1			Pink1			Pink1			Pink1			Pink1			Pink1			Pink1			Armcx1			Pink1			Pink1			Pink1			Pink1
Col4a6			Col4a6			Col4a6			Col4a6			Col4a6			Col4a6			Col4a6			Slit2			Col4a6			Col4a6			Col4a6			Col4a6
Fat2			Fat2			Fat2			Fat2			Fat2			Fat2			Fat2			Pink1			Fat2			Fat2			Fat2			Fat2
Ptprk			Ptprk			Ptprk			Ptprk			Ptprk			Ptprk			Ptprk			Col4a6			Ptprk			Ptprk			Ptprk			Ptprk
Galnt3			Galnt3			Galnt3			Galnt3			Galnt3			Galnt3			Galnt3			Fat2			Galnt3			Galnt3			Galnt3			Galnt3
Lin28b			Lin28b			Lin28b			Lin28b			Lin28b			Lin28b			Lin28b			Ptprk			Lin28b			Lin28b			Lin28b			Lin28b
2410006H16Rik			2410006H16Rik			2410006H16Rik			2410006H16Rik			2410006H16Rik			2410006H16Rik			2410006H16Rik			Galnt3			2410006H16Rik			2410006H16Rik			2410006H16Rik			2410006H16Rik
Prex1			Prex1			Prex1			Prex1			Prex1			Prex1			Prex1			Lin28b			Prex1			Prex1			Prex1			Prex1
Colq			Colq			Colq			Colq			Colq			Colq			Colq			2410006H16Rik			Colq			Colq			Colq			Colq
Rps6ka5			Rps6ka5			Rps6ka5			Rps6ka5			Rps6ka5			Rps6ka5			Rps6ka5			Prex1			Rps6ka5			Rps6ka5			Rps6ka5			Rps6ka5
Ifi27			Ifi27			Ifi27			Ifi27			Ifi27			Ifi27			Ifi27			Colq			Ifi27			Ifi27			Ifi27			Ifi27
Anln			Anln			Anln			Anln			Anln			Anln			Anln			Rps6ka5			Anln			Anln			Anln			Anln
Exd2			Exd2			Exd2			Exd2			Exd2			Exd2			Exd2			Ifi27			Exd2			Exd2			Exd2			Exd2
C130026L21Rik			C130026L21Rik			C130026L21Rik			C130026L21Rik			C130026L21Rik			C130026L21Rik			C130026L21Rik			Anln			C130026L21Rik			C130026L21Rik			C130026L21Rik			C130026L21Rik
Spaar			Spaar			Spaar			Spaar			Spaar			Spaar			Spaar			Exd2			Spaar			Spaar			Spaar			Spaar
Emilin1			Emilin1			Emilin1			Emilin1			Emilin1			Emilin1			Emilin1			C130026L21Rik			Emilin1			Emilin1			Emilin1			Emilin1
Usp29			Usp29			Usp29			Usp29			Usp29			Usp29			Usp29			Spaar			Usp29			Usp29			Usp29			Usp29
1700063D05Rik			1700063D05Rik			1700063D05Rik			1700063D05Rik			1700063D05Rik			1700063D05Rik			1700063D05Rik			Emilin1			1700063D05Rik			1700063D05Rik			1700063D05Rik			1700063D05Rik
Ptgfrn			Ptgfrn			Ptgfrn			Ptgfrn			Ptgfrn			Ptgfrn			Ptgfrn			Usp29			Ptgfrn			Ptgfrn			Ptgfrn			Ptgfrn
Gja5			Gja5			Gja5			Gja5			Gja5			Gja5			Gja5			1700063D05Rik			Gja5			Gja5			Gja5			Gja5
Fat3			Fat3			Fat3			Fat3			Fat3			Fat3			Fat3			Ptgfrn			Fat3			Fat3			Fat3			Fat3
L3mbtl3			L3mbtl3			L3mbtl3			L3mbtl3			L3mbtl3			L3mbtl3			L3mbtl3			Gja5			L3mbtl3			L3mbtl3			L3mbtl3			L3mbtl3
Palld			Palld			Palld			Palld			Palld			Palld			Palld			Fat3			Palld			Palld			Palld			Palld
Smyd1			Smyd1			Smyd1			Smyd1			Smyd1			Smyd1			Smyd1			L3mbtl3			Smyd1			Smyd1			Smyd1			Smyd1
Gm17092			Gm17092			Gm17092			Gm17092			Gm17092			Gm17092			Gm17092			Palld			Gm17092			Gm17092			Gm17092			Gm17092
Golga7b			Golga7b			Golga7b			Golga7b			Golga7b			Golga7b			Golga7b			Smyd1			Golga7b			Golga7b			Golga7b			Golga7b
Adgrb2			Adgrb2			Adgrb2			Adgrb2			Adgrb2			Adgrb2			Adgrb2			Gm17092			Adgrb2			Adgrb2			Adgrb2			Adgrb2
Cdkl1			Cdkl1			Cdkl1			Cdkl1			Cdkl1			Cdkl1			Cdkl1			Golga7b			Cdkl1			Cdkl1			Cdkl1			Cdkl1
Vwa5b1			Vwa5b1			Vwa5b1			Vwa5b1			Vwa5b1			Vwa5b1			Vwa5b1			Adgrb2			Vwa5b1			Vwa5b1			Vwa5b1			Vwa5b1
Rin1			Rin1			Rin1			Rin1			Rin1			Rin1			Rin1			Cdkl1			Rin1			Rin1			Rin1			Rin1
Mmp15			Mmp15			Mmp15			Mmp15			Mmp15			Mmp15			Mmp15			Vwa5b1			Mmp15			Mmp15			Mmp15			Mmp15
Wwox			Wwox			Wwox			Wwox			Wwox			Wwox			Wwox			Rin1			Wwox			Wwox			Wwox			Wwox
Mmp14			Mmp14			Mmp14			Mmp14			Mmp14			Mmp14			Mmp14			Mmp15			Mmp14			Mmp14			Mmp14			Mmp14
Kcnab1			Kcnab1			Kcnab1			Kcnab1			Kcnab1			Kcnab1			Kcnab1			Wwox			Kcnab1			Kcnab1			Kcnab1			Kcnab1
Unc13b			Unc13b			Unc13b			Unc13b			Unc13b			Unc13b			Unc13b			Mmp14			Unc13b			Unc13b			Unc13b			Unc13b
Pcsk6			Pcsk6			Pcsk6			Pcsk6			Pcsk6			Pcsk6			Pcsk6			Kcnab1			Pcsk6			Pcsk6			Pcsk6			Pcsk6
Gm42517			Gm42517			Gm42517			Gm42517			Gm42517			Gm42517			Gm42517			Unc13b			Gm42517			Gm42517			Gm42517			Gm42517
Tmem132a			Tmem132a			Tmem132a			Tmem132a			Tmem132a			Tmem132a			Tmem132a			Pcsk6			Tmem132a			Tmem132a			Tmem132a			Tmem132a
Resp18			Resp18			Resp18			Resp18			Resp18			Resp18			Resp18			Gm42517			Resp18			Resp18			Resp18			Resp18
Plxdc1			Plxdc1			Plxdc1			Plxdc1			Plxdc1			Plxdc1			Plxdc1			Tmem132a			Plxdc1			Plxdc1			Plxdc1			Plxdc1
2310022B05Rik			2310022B05Rik			2310022B05Rik			2310022B05Rik			2310022B05Rik			2310022B05Rik			2310022B05Rik			Resp18			2310022B05Rik			2310022B05Rik			2310022B05Rik			2310022B05Rik
Hapln2			Hapln2			Hapln2			Hapln2			Hapln2			Hapln2			Hapln2			Plxdc1			Hapln2			Hapln2			Hapln2			Hapln2
Rxra			Rxra			Rxra			Rxra			Rxra			Rxra			Rxra			2310022B05Rik			Rxra			Rxra			Rxra			Rxra
Mylk			Mylk			Mylk			Mylk			Mylk			Mylk			Mylk			Hapln2			Mylk			Mylk			Mylk			Mylk
Rnf122			Rnf122			Rnf122			Rnf122			Rnf122			Rnf122			Rnf122			Rxra			Rnf122			Rnf122			Rnf122			Rnf122
Gm10095			Gm10095			Gm10095			Gm10095			Gm10095			Gm10095			Gm10095			Mylk			Gm10095			Gm10095			Gm10095			Gm10095
Cacng8			Cacng8			Cacng8			Cacng8			Cacng8			Cacng8			Cacng8			Rnf122			Cacng8			Cacng8			Cacng8			Cacng8
Lrp4			Lrp4			Lrp4			Lrp4			Lrp4			Lrp4			Lrp4			Gm10095			Lrp4			Lrp4			Lrp4			Lrp4
Erbin			Erbin			Erbin			Erbin			Erbin			Erbin			Erbin			Cacng8			Erbin			Erbin			Erbin			Erbin
A2m			A2m			A2m			A2m			A2m			A2m			A2m			Lrp4			A2m			A2m			A2m			A2m
Ube2d2a			Ube2d2a			Ube2d2a			Ube2d2a			Ube2d2a			Ube2d2a			Ube2d2a			Erbin			Ube2d2a			Ube2d2a			Ube2d2a			Ube2d2a
A430027H14Rik			A430027H14Rik			A430027H14Rik			A430027H14Rik			A430027H14Rik			A430027H14Rik			A430027H14Rik			A2m			A430027H14Rik			A430027H14Rik			A430027H14Rik			A430027H14Rik
Dlec1			Dlec1			Dlec1			Dlec1			Dlec1			Dlec1			Dlec1			Ube2d2a			Dlec1			Dlec1			Dlec1			Dlec1
Gad1			Gad1			Gad1			Gad1			Gad1			Gad1			Gad1			A430027H14Rik			Gad1			Gad1			Gad1			Gad1
Nap1l5			Nap1l5			Nap1l5			Nap1l5			Nap1l5			Nap1l5			Nap1l5			Dlec1			Nap1l5			Nap1l5			Nap1l5			Nap1l5
Epha6			Epha6			Epha6			Epha6			Epha6			Epha6			Epha6			Gad1			Epha6			Epha6			Epha6			Epha6
Impact			Impact			Impact			Impact			Impact			Impact			Impact			Nap1l5			Impact			Impact			Impact			Impact
Hpcal4			Hpcal4			Hpcal4			Hpcal4			Hpcal4			Hpcal4			Hpcal4			Epha6			Hpcal4			Hpcal4			Hpcal4			Hpcal4
Ppp1r7			Ppp1r7			Ppp1r7			Ppp1r7			Ppp1r7			Ppp1r7			Ppp1r7			Impact			Ppp1r7			Ppp1r7			Ppp1r7			Ppp1r7
Flt4			Flt4			Flt4			Flt4			Flt4			Flt4			Flt4			Hpcal4			Flt4			Flt4			Flt4			Flt4
AC157931.1			AC157931.1			AC157931.1			AC157931.1			AC157931.1			AC157931.1			AC157931.1			Ppp1r7			AC157931.1			AC157931.1			AC157931.1			AC157931.1
Dclk3			Dclk3			Dclk3			Dclk3			Dclk3			Dclk3			Dclk3			Flt4			Dclk3			Dclk3			Dclk3			Dclk3
Pgls			Pgls			Pgls			Pgls			Pgls			Pgls			Pgls			AC157931.1			Pgls			Pgls			Pgls			Pgls
Rab7b			Rab7b			Rab7b			Rab7b			Rab7b			Rab7b			Rab7b			Dclk3			Rab7b			Rab7b			Rab7b			Rab7b
Dbn1			Dbn1			Dbn1			Dbn1			Dbn1			Dbn1			Dbn1			Pgls			Dbn1			Dbn1			Dbn1			Dbn1
Kif11			Kif11			Kif11			Kif11			Kif11			Kif11			Kif11			Rab7b			Kif11			Kif11			Kif11			Kif11
Adgra2			Adgra2			Adgra2			Adgra2			Adgra2			Adgra2			Adgra2			Dbn1			Adgra2			Adgra2			Adgra2			Adgra2
Alcam			Alcam			Alcam			Alcam			Alcam			Alcam			Alcam			Kif11			Alcam			Alcam			Alcam			Alcam
Enox1			Enox1			Enox1			Enox1			Enox1			Enox1			Enox1			Adgra2			Enox1			Enox1			Enox1			Enox1
Scn9a			Scn9a			Scn9a			Scn9a			Scn9a			Scn9a			Scn9a			Alcam			Scn9a			Scn9a			Scn9a			Scn9a
Grb10			Grb10			Grb10			Grb10			Grb10			Grb10			Grb10			Enox1			Grb10			Grb10			Grb10			Grb10
Arhgap29			Arhgap29			Arhgap29			Arhgap29			Arhgap29			Arhgap29			Arhgap29			Scn9a			Arhgap29			Arhgap29			Arhgap29			Arhgap29
Gm40466			Gm40466			Gm40466			Gm40466			Gm40466			Gm40466			Gm40466			Grb10			Gm40466			Gm40466			Gm40466			Gm40466
Map3k10			Map3k10			Map3k10			Map3k10			Map3k10			Map3k10			Map3k10			Arhgap29			Map3k10			Map3k10			Map3k10			Map3k10
Prkg2			Prkg2			Prkg2			Prkg2			Prkg2			Prkg2			Prkg2			Gm40466			Prkg2			Prkg2			Prkg2			Prkg2
Cdhr3			Cdhr3			Cdhr3			Cdhr3			Cdhr3			Cdhr3			Cdhr3			Map3k10			Cdhr3			Cdhr3			Cdhr3			Cdhr3
Zfp804b			Zfp804b			Zfp804b			Zfp804b			Zfp804b			Zfp804b			Zfp804b			Prkg2			Zfp804b			Zfp804b			Zfp804b			Zfp804b
Myh14			Myh14			Myh14			Myh14			Myh14			Myh14			Myh14			Cdhr3			Myh14			Myh14			Myh14			Myh14
Plppr2			Plppr2			Plppr2			Plppr2			Plppr2			Plppr2			Plppr2			Zfp804b			Plppr2			Plppr2			Plppr2			Plppr2
Grb14			Grb14			Grb14			Grb14			Grb14			Grb14			Grb14			Myh14			Grb14			Grb14			Grb14			Grb14
Sall2			Sall2			Sall2			Sall2			Sall2			Sall2			Sall2			Plppr2			Sall2			Sall2			Sall2			Sall2
Pcdh15			Pcdh15			Pcdh15			Pcdh15			Pcdh15			Pcdh15			Pcdh15			Grb14			Pcdh15			Pcdh15			Pcdh15			Pcdh15
Slc8a3			Slc8a3			Slc8a3			Slc8a3			Slc8a3			Slc8a3			Slc8a3			Sall2			Slc8a3			Slc8a3			Slc8a3			Slc8a3
5031425E22Rik			5031425E22Rik			5031425E22Rik			5031425E22Rik			5031425E22Rik			5031425E22Rik			5031425E22Rik			Pcdh15			5031425E22Rik			5031425E22Rik			5031425E22Rik			5031425E22Rik
2610011E03Rik			2610011E03Rik			2610011E03Rik			2610011E03Rik			2610011E03Rik			2610011E03Rik			2610011E03Rik			Slc8a3			2610011E03Rik			2610011E03Rik			2610011E03Rik			2610011E03Rik
Hcn4			Hcn4			Hcn4			Hcn4			Hcn4			Hcn4			Hcn4			5031425E22Rik			Hcn4			Hcn4			Hcn4			Hcn4
Chst1			Chst1			Chst1			Chst1			Chst1			Chst1			Chst1			2610011E03Rik			Chst1			Chst1			Chst1			Chst1
Proca1			Proca1			Proca1			Proca1			Proca1			Proca1			Proca1			Hcn4			Proca1			Proca1			Proca1			Proca1
Gm48530			Gm48530			Gm48530			Gm48530			Gm48530			Gm48530			Gm48530			Chst1			Gm48530			Gm48530			Gm48530			Gm48530
Lama4			Lama4			Lama4			Lama4			Lama4			Lama4			Lama4			Proca1			Lama4			Lama4			Lama4			Lama4
Gm26782			Gm26782			Gm26782			Gm26782			Gm26782			Gm26782			Gm26782			Gm48530			Gm26782			Gm26782			Gm26782			Gm26782
Grrp1			Grrp1			Grrp1			Grrp1			Grrp1			Grrp1			Grrp1			Lama4			Grrp1			Grrp1			Grrp1			Grrp1
2600014E21Rik			2600014E21Rik			2600014E21Rik			2600014E21Rik			2600014E21Rik			2600014E21Rik			2600014E21Rik			Gm26782			2600014E21Rik			2600014E21Rik			2600014E21Rik			2600014E21Rik
Nlrc3			Nlrc3			Nlrc3			Nlrc3			Nlrc3			Nlrc3			Nlrc3			Grrp1			Nlrc3			Nlrc3			Nlrc3			Nlrc3
Lhfpl5			Lhfpl5			Lhfpl5			Lhfpl5			Lhfpl5			Lhfpl5			Lhfpl5			2600014E21Rik			Lhfpl5			Lhfpl5			Lhfpl5			Lhfpl5
Ptprj			Ptprj			Ptprj			Ptprj			Ptprj			Ptprj			Ptprj			Nlrc3			Ptprj			Ptprj			Ptprj			Ptprj
Gm19500			Gm19500			Gm19500			Gm19500			Gm19500			Gm19500			Gm19500			Lhfpl5			Gm19500			Gm19500			Gm19500			Gm19500
Gm44441			Gm44441			Gm44441			Gm44441			Gm44441			Gm44441			Gm44441			Ptprj			Gm44441			Gm44441			Gm44441			Gm44441
C1ql3			C1ql3			C1ql3			C1ql3			C1ql3			C1ql3			C1ql3			Gm19500			C1ql3			C1ql3			C1ql3			C1ql3
Akain1			Akain1			Akain1			Akain1			Akain1			Akain1			Akain1			Gm44441			Akain1			Akain1			Akain1			Akain1
																					C1ql3
																					Akain1

## Sheet: CTX YvO
Positive regulation of inflammatory response	11		Negative regulation of inflammatory response	9		Interferon-mediated signalling	3		Interleukin-mediated signalling	5		DAMs 2021	10		Microglial Exhaustion	3		Inflammasomes	1		cGAS-STING	0		Tfam-/-	7		LINE1 Derepression	2		TE Regulation	0		H3K9me3 proteome
Abcc1	Camk2n1		Abr	Cd24a		Adar	Igtp		Akt1	Il33		4632427E13Rik	Cd22		Ager	Cd274		Aim2	Casp1		Akt1			Abi3bp	Abi3bp		Bst2	Ifi27		Actb			BCLAF1
Adam8	Casp1		Acod1	Cd44		Arg1	Nlrc5		C1qtnf4	Rps6ka5		9130401M01Rik	Ctsz		Anxa1	Cd38		Casp1			Aurkb			Agrn	H2-Q4		Cxcl10	Ifit3		Actl6a			CHTOP
Adora2b	Cd24a		Acp5	Cd200		Cactin	Oas1b		Casp4	St18		Acaca	Gpnmb		Bcl6	Il33		Casp4			Banf1			Apol9b	Ifit3		Ifi204			Actl6b			Crebrf
Adora3	Csf1r		Ada	Cx3cr1		Cdc37			Cd300lf	Stat4		Ache	H2-D1		Ccl2			Ddx3x			Cdk1			Bst2	Igtp		Ifi27			Ago2			CBX1
Aim2	H2-D1		Adcyap1	Gpr17		Cnot7			Cd4	Stat6		Adarb1	H2-K1		Ccr2			Dhx33			Cgas			Ccl2	Lgals3bp		Ifi30			Alkbh5			CBX3
Alox5ap	H2-K1		Adipoq	Igtp		Dcst1			Cebpa			Adck5	Lgals3bp		Ccr5			Gsdmd			Ifi204			Cmpk2	Rnf213		Ifih1			Arid1a			CBX5
Aoc3	H2-Q4		Adora1	Il33		Dnaja3			Csf2rb			Ank	Lpl		Cd244a			Il18			Irf3			Cxcl10	Xaf1		Ifit1			Arid1b			CCDC137
App	H2-T22		Adora2a	Nr1d1		Eif4e2			Csf2rb2			Ankrd16	Nlrc5		Cd274			Il1b			Irf9			Dhx58			Ifit2			Arid2			CCDC59
Btk	Il33		Ahr			Fadd			Ctr9			Apbb2	St14		Cd38			Naip1			Lyplal1			Dtx3l			Ifit3			Atf7ip			CCDC86
C2cd4a	Lpl		Alox5			Gigyf2			Cxcr2			Aplp2			Cd72			Naip2			Map3k7			Enpep			Ifitm1			Atrx			CEBPZ
C2cd4b	Snca		Aoah			Hdac4			Cyld			Apoe			Cd74			Naip5			Nfkb1			Enpp2			Ifitm3			Bap1			CHAF1A
C3			Apoa1			Hpx			Egr1			Aprt			Cd86			Naip6			Parp1			Gbp2			Ifna1			Bcl7a			YBX3
Camk2n1			Apoe			Ifih1			Fcer1g			Arap2			Clec7a			Nlrc4			Ppp6c			Gbp3			Ifna2			Bcl7b			CUX1
Casp1			Arnt			Ifitm1			Fer			Arrdc4			Csf1			Nlrp1a			Prkdc			Gbp7			Ifne			Bcl7c			DDX17
Casp4			Ash1l			Ifitm2			Gab1			Asb10			Cxcl10			Nlrp1b			Sting1			H2-Q4			Irf5			Bicra			DDX5
Ccl1			Bcr			Ifitm3			Gfi1			Atf3			Entpd1			Nlrp3			Tab1			Helz2			Isg15			Bicral			EBNA1BP2
Ccl3			C1qtnf3			Ifitm6			Ikbkb			Atp11c			Havcr2			Nlrp6			Tbk1			Ifi35			Jak1			Brd4			ERH
Ccl5			C1qtnf12			Ifitm7			Ikbke			Atp6v0c			Icos			Pycard			Zbp1			Ifi44			Mal			Brd7			EXOSC10
Ccl24			Ccn3			Ifna1			Il11			Atp6v0c-ps2			Il2rb						Zdhhc18			Ifih1			Mx1			Brd9			FUS
Ccn4			Cd24a			Ifnar1			Il11ra1			Axl			Il33						Zdhhc9			Ifit1			Mx2			Cbx1			FYTTD1
Ccr2			Cd44			Ifnar2			Il11ra2			Baiap2l2			Il7r									Ifit3			Oas2			Cbx3			GATAD2A
Ccr5			Cd200			Ifnb1						Bcl2a1b			Kit									Ifit3b			Rigi			Cbx5			GATAD2B
Ccr7			Cd200l1			Ifng			Il12a			Birc5			Klf4									Igtp			Stat1			Cdk2ap1			Nop53
Cd24a			Cd200l2			Ifngr1			Il12b			Bola2			Lag3									Iigp1			Stat3			Cdk2ap2			HDLBP
Cd28			Cd200r1			Ifngr2			Il12rb1			Cadm1			Ly96									Irf7			Tnfsf10			Chaf1a			HMGA1
Cd47			Cd276			Igtp			Il12rb2			Capg			Myd88									Irf9						Chaf1b			HNRNPA2B1
Cd81			Cdh5			Ikbke			Il15			Ccdc88a			Nfkb1									Irgm1						Chd3			HNRNPK
Cebpa			Chrna7			Irak1			Il15ra			Ccl3			P2rx7									Irgm2						Chd4			HNRNPL
Cebpb			Cst7			Irf1			Il17a			Ccl4			Pdcd1									Isg15						Chd5			HP1BP3
Clock			Ctla2a			Irf3			Il17f			Ccl6			Prickle1									Lgals3bp						Ctcf			KHDRBS1
Cnr1			Cx3cr1			Irf7			Il17ra			Cd22			S100a8									Mx2						Daxx			KHDRBS3
Csf1r			Cxcl17			Irgm1			Il17rc			Cd34			Satb1									Oas1a						Ddx4			LLPH
Ctsc			Cyld			Irgm2			Il18			Cd52			Sirpa									Oasl2						Dgcr8			LOXL1
Ctss			Cyp19a1			Isg15			Il18r1			Cd63			Socs3									Parp10						Dhx9			LOXL2
Ddt			Dusp10			Jak1			Il18rap			Cd74			Spp1									Parp14						Dicer1			LTBP2
Dhx9			Elf4			Jak2			Il1a			Cd83			Stat1									Parp9						Dnmt1			MATR3
Ets1			Enpp3			Lsm14a			Il1b			Cd9			Tcf7									Psmb8						Dnmt3a			MBD3
Fabp4			Ets1			Mavs			Il1r1			Cdc42ep3			Ticam1									Rigi						Dnmt3b			MBNL1
Fcer1a			Extl3			Med1			Il1r2			Cdca8			Ticam2									Rnf213						Dnmt3c			MPHOSPH10
Fcer1g			Fcgr2b			Mettl3			Il1rap			Ch25h			Tirap									Rtp4						Dnmt3l			MRTO4
Fcgr1			Fem1a			Mmp12			Il1rl1			Chst1												Sim2						Dpf1			MYBBP1A
Fcgr3			Fem1al			Mul1			Il1rn			Clec7a												Slfn2						Dpf2			MYEF2
Fem1a			Ffar4			Myd88			Il2			Cops9												Stat1						Dpf3			NCOA5
Ffar2			Fndc4			Nlrc5			Il2ra			Cox6a2												Stat2						Drosha			NCOA7
Ffar3			Foxf1			Oas1a			Il2rb			Cox6c												Tgtp1						Ehmt1			NONO
Gpr4			Foxp3			Oas1b			Il2rg			Cpd												Trim30a						Ehmt2			PES1
Gprc5b			Fpr2			Oas1c			Il3			Crip1												Trim30d						Elp3			PHB
Gpsm3			Fpr3			Oas1d			Il33			Crlf2												Usp18						Fto			PIAS2
Grn			Fpr-rs3			Oas1e			Il34			Csf1												Xaf1						Gatad2a			POLDIP3
Gsdmd			Fpr-rs4			Oas1f			Il3ra			Csf2ra												Zbp1						Gatad2b			PPAN
H2-D1			Fpr-rs6			Oas1g			Il4			Cst7																		Gtsf1			PPHLN1
H2-K1			Fpr-rs7			Oas1h			Il4ra			Ctsb																		H3f3a			PRDM15
H2-M1			Fxr1			Oas2			Il5			Ctsz																		H3f3b			PRMT1
H2-M2			Gata3			Oas3			Il5ra			Cxcl16																		H3f3c			PRRX2
H2-M5			Ghrl			Otop1			Il6			Cybb																		Hdac1			PTBP1
H2-M9			Ghsr			Parp9			Il6ra			Dhcr7																		Hdac2			QKI
H2-M10.1			Git1			Parp14			Il6st			Dhx32																		Hinfp			RBM12B1
H2-M10.2			Gper1			Pparg			Il9r			Dnajc15																		Kmt5b			RBM15
H2-M10.3			Gpr17			Ptpn2			Irak1			Dpcd																		Kmt5c			RBM26
H2-M10.4			Gpr31b			Rbm47			Irak2			Dpp7																		Lig1			RBM6
H2-M10.5			Gps2			Rfpl4b			Irak3			Dusp3																		Mbd2			RBMX
H2-M10.6			Gpx1			Rnf185			Irak4			Echs1																		Mbd3			RBMXL1
H2-M11			Gpx2			Samhd1			Jak1			Egr2																		Mbd5			RELA
H2-Q1			Grn			Sin3a			Jak2			Ell2																		Mbd6			RIF1
H2-Q2			Gstp1			Smim30			Jak3			Enpp1																		Mettl14			RPF1
H2-Q4			Hamp			Stat1			Lyn			Enpp2																		Mettl16			RPF2
H2-Q6			Hgf			Stat2			Map3k7			Ero1b																		Mettl3			RPS19BP1
H2-Q7			Ier3			Sting1			Mapk3			Etl4																		Morc1			SAFB
H2-Q10			Igf1			Tbk1			Mir301			Fam20c																		Morc2a			SAFB2
H2-T3			Igtp			Trex1			Myd88			Fcgr4																		Morc2b			SETDB1
H2-T9			Il2			Trim6			Nfkbia			Fgl2																		Morc3			SFPQ
H2-T10			Il2ra			Trim41			Nlrp6			Frrs1																		Mov10l1			TRA2B
H2-T22			Il4			Trim56			Notch1			Fth1																		Mphosph8			SLTM
H2-T23			Il10			Trim65			Oas2			Ftl1																		Mta1			SUMO2
Hyal2			Il10ra			Trp53			Oasl1			Fxyd5																		Mta2			SUV39H1
Ido1			Il12b			Ttll12			Oasl2			Fxyd6																		Mta3			SUV39H2
Ifi35			Il13			Txk			Otud4			Gfus																		Mtr4			SUZ12
Ifng			Il17a			Tyk2			Parp14			Glipr1																		Nsun2			TAF15
Ighg1			Il20rb			Ube2k			Pdgfb			Gm15772																		Ogt			TARDBP
Ighg2b			Il22			Usp27x			Pik3r1			Gnas																		Pabpn1			TCF25
Il1b			Il22ra1			Usp29			Plcb1			Gng12																		Pbrm1			THRAP3
Il1rl1			Il22ra2			Wnt5a			Ptpn2			Got1																		Phf10			TRA2A
Il6			Il33			Ythdf2			Rela			Gpnmb																		Piwil1			TRIM28
Il16			Ins1			Ythdf3			Ripk1			Gpr65																		Piwil2			UBE2I
Il17ra			Ins2			Zbp1			Rps6ka4			Gusb																		Piwil4			UTP3
Il17rb			Irgm1						Rps6ka5			H2-D1																		Pld6			WDR46
Il18			Irgm2						Smad4			H2-K1																		Pphln1			XRN2
Il33			Isl1						Spi1			H2-Q7																		Pspc1			YBX1
Kars1			Krt1						Src			Hif1a																		Rbbp4			YLPM1
Kcnn4			Ldlr						Srsf1			Ifi204																		Rbbp7			YTHDC1
Lbp			Lgals9						St18			Ifi27l2a																		Rbm26			YY2
Ldlr			Lpcat3						Stat1			Ifi27l2b																		Rbm27			ZC3H13
Lgals1			Lrfn5						Stat3			Ifit1																		Rbm7			Zfp207
Lgals2			Macir						Stat4			Ifit2																		Safb			Zfp326
Lilra5			Mdk						Stat5a			Igf1																		Safb2			Zfp438
Lpl			Mefv						Stat6			Il1b																		Setdb1			Zfp512
Lrrk2			Metrnl						Syk			Ildr2																		Setdb2			Zfp598
Lta			Mfhas1						Ticam2			Itgax																		Sin3a			Zfp622
Mdk			Mir147						Tirap			Kcnj2																		Sinhcaf			Zfp638
Mefv			Mir7578						Tnip2			Lgals3bp																		Sirt1
Mmp8			Mkrn2						Tollip			Lgi2																		Sirt6
Napepld			Muc19						Traf2			Lmbrd2																		Sltm
Nfkbia			Mvk						Traf3ip2			Lpl																		Smarca2
Nfkbiz			Ndfip1						Traf5			Lyz2																		Smarca4
Ninj1			Nfkb1						Traf6			Lyzl4																		Smarcb1
Nkg7			Nlrc3						Trim32			Mamdc2																		Smarcc1
Nlrp1a			Nlrp3						Tut4			Mblac2																		Smarcc2
Nlrp1b			Nlrp6						Tyk2			Mif																		Smarcd1
Nlrp3			Nlrp12						Usp25			Mir682																		Smarcd2
Nlrp6			Nlrx1						Vrk2			Mrpl27																		Smarcd3
Nlrp10			Nod2						Yap1			Mt1																		Smarce1
Nmi			Npy						Zbp1			Myo1e																		Spen
Nppa			Npy5r									Naglu																		Spocd1
Npy5r			Nr1d1									Nat8l																		Ss18
Nupr1			Nr1d2									Ncbp2as2																		Ss18l1
Osm			Nr1h3									Nceh1																		Ss18l2
Park7			Nr1h4									Ndufv3																		Sumo2
Pdcd4			Nr1h5									Nlrc5																		Suv39h1
Pde2a			Nt5e									Npc2																		Suv39h2
Pde5a			Otulin									Pkib																		Tarbp2
Pik3cg			Pbk									Pld3																		Tasor
Pla2g3			Pdcd10									Pogk																		Tasor2
Plcg2			Pf4									Psat1																		Tet1
Prkca			Pglyrp1									Pycrl																		Tet2
Ptger3			Pla2g5									Ramp1																		Tex15
Ptger4			Pla2g10									Rap2b																		Tnrc18
Ptgs2			Ppara									Rpl23																		Trim28
Pycard			Ppard									Rps18																		Uhrf1
Ripk1			Pparg									Rras																		Uhrf2
Rps19			Proc									S1pr1																		Wiz
S100a8			Psma1									Scd2																		Wtap
S100a9			Psmb4									Scpep1																		Ytdc1
Serpine1			Ptger4									Sdc3																		Ytdc2
Setd4			Ptgis									Serpine2																		Ytdfh2
Snca			Ptpn2									Slamf9																		Ytdhf3
Snx4			Ptpn6									Slc1a2																		Ythdf1
Stap1			Rabgef1									Slc23a2																		Yy1
Stat5a			Rb1									Slc44a1																		Zc3h13
Stat5b			Reg3g									Speg																		Zc3h3
Sucnr1			Rora									Spp1																		Zcchc8
Tac1			Rps19									Srebf2																		Zfc3h1
Tafa3			Selenos									Ssh1
Tgfb1			Sharpin									Ssr4
Tlr2			Siglece									St14
Tlr4			Siglecg									St8sia6
Tlr6			Sirpa									Stim2
Tnf			Slamf8									Sulf2
Tnfrsf1a			Slc39a8									Syngr1
Tnfrsf11a			Smad3									Tbcd
Tnfsf4			Smpdl3b									Thbs1
Tnfsf11			Socs3									Tmem154
Tnfsf18			Socs5									Tpd52
Tnip1			Sod1									Trim32
Tradd			Spn									Tspo
Trem2			Stat3									Ttf1
Trpv4			Syt11									Ttr
Tslp			Tafa3									Tuba1c
Ttbk1			Tff2									Tyrobp
Vamp8			Tnfaip3									Upp2
Wnt5a			Tnfaip6									Zdhhc21
Zbp1			Tnfaip8l2									Zfas1
Zp3			Tnfrsf1a									Zfp692
			Tnfrsf1b
			Trem2
			Trim45
			Trim65
			Tyro3
			Uaca
			Vps35
			Wfdc1
			Zfp36
Pcdhb3			Pcdhb3			Pcdhb3			Pcdhb3			Pcdhb3			Pcdhb3			Pcdhb3						Pcdhb3			Pcdhb3			Pcdhb3			Pcdhb3
Ide			Ide			Ide			Ide			Ide			Ide			Ide						Ide			Ide			Ide			Ide
Klhl1			Klhl1			Klhl1			Klhl1			Klhl1			Klhl1			Klhl1			Pcdhb3			Klhl1			Klhl1			Klhl1			Klhl1
Cabp7			Cabp7			Cabp7			Cabp7			Cabp7			Cabp7			Cabp7			Ide			Cabp7			Cabp7			Cabp7			Cabp7
Nlrp5-ps			Nlrp5-ps			Nlrp5-ps			Nlrp5-ps			Nlrp5-ps			Nlrp5-ps			Nlrp5-ps			Klhl1			Nlrp5-ps			Nlrp5-ps			Nlrp5-ps			Nlrp5-ps
Zfp268			Zfp268			Zfp268			Zfp268			Zfp268			Zfp268			Zfp268			Cabp7			Zfp268			Zfp268			Zfp268			Zfp268
Met			Met			Met			Met			Met			Met			Met			Nlrp5-ps			Met			Met			Met			Met
Vmn1r90			Vmn1r90			Vmn1r90			Vmn1r90			Vmn1r90			Vmn1r90			Vmn1r90			Zfp268			Vmn1r90			Vmn1r90			Vmn1r90			Vmn1r90
Pcdhb2			Pcdhb2			Pcdhb2			Pcdhb2			Pcdhb2			Pcdhb2			Pcdhb2			Met			Pcdhb2			Pcdhb2			Pcdhb2			Pcdhb2
C4b			C4b			C4b			C4b			C4b			C4b			C4b			Vmn1r90			C4b			C4b			C4b			C4b
B230209E15Rik			B230209E15Rik			B230209E15Rik			B230209E15Rik			B230209E15Rik			B230209E15Rik			B230209E15Rik			Pcdhb2			B230209E15Rik			B230209E15Rik			B230209E15Rik			B230209E15Rik
Alox8			Alox8			Alox8			Alox8			Alox8			Alox8			Alox8			C4b			Alox8			Alox8			Alox8			Alox8
Abca8a			Abca8a			Abca8a			Abca8a			Abca8a			Abca8a			Abca8a			B230209E15Rik			Abca8a			Abca8a			Abca8a			Abca8a
Casp1			Casp1			Casp1			Casp1			Casp1			Casp1			Casp1			Alox8			Casp1			Casp1			Casp1			Casp1
Obox3-ps7			Obox3-ps7			Obox3-ps7			Obox3-ps7			Obox3-ps7			Obox3-ps7			Obox3-ps7			Abca8a			Obox3-ps7			Obox3-ps7			Obox3-ps7			Obox3-ps7
Pcdhb14			Pcdhb14			Pcdhb14			Pcdhb14			Pcdhb14			Pcdhb14			Pcdhb14			Casp1			Pcdhb14			Pcdhb14			Pcdhb14			Pcdhb14
Pcdhb9			Pcdhb9			Pcdhb9			Pcdhb9			Pcdhb9			Pcdhb9			Pcdhb9			Obox3-ps7			Pcdhb9			Pcdhb9			Pcdhb9			Pcdhb9
Btaf1			Btaf1			Btaf1			Btaf1			Btaf1			Btaf1			Btaf1			Pcdhb14			Btaf1			Btaf1			Btaf1			Btaf1
9630013A20Rik			9630013A20Rik			9630013A20Rik			9630013A20Rik			9630013A20Rik			9630013A20Rik			9630013A20Rik			Pcdhb9			9630013A20Rik			9630013A20Rik			9630013A20Rik			9630013A20Rik
Ptpro			Ptpro			Ptpro			Ptpro			Ptpro			Ptpro			Ptpro			Btaf1			Ptpro			Ptpro			Ptpro			Ptpro
E230020A03Rik			E230020A03Rik			E230020A03Rik			E230020A03Rik			E230020A03Rik			E230020A03Rik			E230020A03Rik			9630013A20Rik			E230020A03Rik			E230020A03Rik			E230020A03Rik			E230020A03Rik
Pcdhb8			Pcdhb8			Pcdhb8			Pcdhb8			Pcdhb8			Pcdhb8			Pcdhb8			Ptpro			Pcdhb8			Pcdhb8			Pcdhb8			Pcdhb8
Rimklb			Rimklb			Rimklb			Rimklb			Rimklb			Rimklb			Rimklb			E230020A03Rik			Rimklb			Rimklb			Rimklb			Rimklb
Pcdhb6			Pcdhb6			Pcdhb6			Pcdhb6			Pcdhb6			Pcdhb6			Pcdhb6			Pcdhb8			Pcdhb6			Pcdhb6			Pcdhb6			Pcdhb6
AA414992			AA414992			AA414992			AA414992			AA414992			AA414992			AA414992			Rimklb			AA414992			AA414992			AA414992			AA414992
Pcdhb11			Pcdhb11			Pcdhb11			Pcdhb11			Pcdhb11			Pcdhb11			Pcdhb11			Pcdhb6			Pcdhb11			Pcdhb11			Pcdhb11			Pcdhb11
Pcdhb4			Pcdhb4			Pcdhb4			Pcdhb4			Pcdhb4			Pcdhb4			Pcdhb4			AA414992			Pcdhb4			Pcdhb4			Pcdhb4			Pcdhb4
Pcdhb5			Pcdhb5			Pcdhb5			Pcdhb5			Pcdhb5			Pcdhb5			Pcdhb5			Pcdhb11			Pcdhb5			Pcdhb5			Pcdhb5			Pcdhb5
Marcksl1			Marcksl1			Marcksl1			Marcksl1			Marcksl1			Marcksl1			Marcksl1			Pcdhb4			Marcksl1			Marcksl1			Marcksl1			Marcksl1
Epha3			Epha3			Epha3			Epha3			Epha3			Epha3			Epha3			Pcdhb5			Epha3			Epha3			Epha3			Epha3
Gpr88			Gpr88			Gpr88			Gpr88			Gpr88			Gpr88			Gpr88			Marcksl1			Gpr88			Gpr88			Gpr88			Gpr88
3222401L13Rik			3222401L13Rik			3222401L13Rik			3222401L13Rik			3222401L13Rik			3222401L13Rik			3222401L13Rik			Epha3			3222401L13Rik			3222401L13Rik			3222401L13Rik			3222401L13Rik
Gm43398			Gm43398			Gm43398			Gm43398			Gm43398			Gm43398			Gm43398			Gpr88			Gm43398			Gm43398			Gm43398			Gm43398
Fermt1			Fermt1			Fermt1			Fermt1			Fermt1			Fermt1			Fermt1			3222401L13Rik			Fermt1			Fermt1			Fermt1			Fermt1
Pappa2			Pappa2			Pappa2			Pappa2			Pappa2			Pappa2			Pappa2			Gm43398			Pappa2			Pappa2			Pappa2			Pappa2
Pcdhga2			Pcdhga2			Pcdhga2			Pcdhga2			Pcdhga2			Pcdhga2			Pcdhga2			Fermt1			Pcdhga2			Pcdhga2			Pcdhga2			Pcdhga2
Pcdhga8			Pcdhga8			Pcdhga8			Pcdhga8			Pcdhga8			Pcdhga8			Pcdhga8			Pappa2			Pcdhga8			Pcdhga8			Pcdhga8			Pcdhga8
Ly9			Ly9			Ly9			Ly9			Ly9			Ly9			Ly9			Pcdhga2			Ly9			Ly9			Ly9			Ly9
Zc3hav1			Zc3hav1			Zc3hav1			Zc3hav1			Zc3hav1			Zc3hav1			Zc3hav1			Pcdhga8			Zc3hav1			Zc3hav1			Zc3hav1			Zc3hav1
Gm30371			Gm30371			Gm30371			Gm30371			Gm30371			Gm30371			Gm30371			Ly9			Gm30371			Gm30371			Gm30371			Gm30371
5330434G04Rik			5330434G04Rik			5330434G04Rik			5330434G04Rik			5330434G04Rik			5330434G04Rik			5330434G04Rik			Zc3hav1			5330434G04Rik			5330434G04Rik			5330434G04Rik			5330434G04Rik
Gm16505			Gm16505			Gm16505			Gm16505			Gm16505			Gm16505			Gm16505			Gm30371			Gm16505			Gm16505			Gm16505			Gm16505
Gm18529			Gm18529			Gm18529			Gm18529			Gm18529			Gm18529			Gm18529			5330434G04Rik			Gm18529			Gm18529			Gm18529			Gm18529
Gm38340			Gm38340			Gm38340			Gm38340			Gm38340			Gm38340			Gm38340			Gm16505			Gm38340			Gm38340			Gm38340			Gm38340
Sox4			Sox4			Sox4			Sox4			Sox4			Sox4			Sox4			Gm18529			Sox4			Sox4			Sox4			Sox4
Mdfic2			Mdfic2			Mdfic2			Mdfic2			Mdfic2			Mdfic2			Mdfic2			Gm38340			Mdfic2			Mdfic2			Mdfic2			Mdfic2
Erich5			Erich5			Erich5			Erich5			Erich5			Erich5			Erich5			Sox4			Erich5			Erich5			Erich5			Erich5
Bhlhe41			Bhlhe41			Bhlhe41			Bhlhe41			Bhlhe41			Bhlhe41			Bhlhe41			Mdfic2			Bhlhe41			Bhlhe41			Bhlhe41			Bhlhe41
ENSMUSG00000095041			ENSMUSG00000095041			ENSMUSG00000095041			ENSMUSG00000095041			ENSMUSG00000095041			ENSMUSG00000095041			ENSMUSG00000095041			Erich5			ENSMUSG00000095041			ENSMUSG00000095041			ENSMUSG00000095041			ENSMUSG00000095041
Stac2			Stac2			Stac2			Stac2			Stac2			Stac2			Stac2			Bhlhe41			Stac2			Stac2			Stac2			Stac2
Entpd3			Entpd3			Entpd3			Entpd3			Entpd3			Entpd3			Entpd3			ENSMUSG00000095041			Entpd3			Entpd3			Entpd3			Entpd3
Gm42756			Gm42756			Gm42756			Gm42756			Gm42756			Gm42756			Gm42756			Stac2			Gm42756			Gm42756			Gm42756			Gm42756
Hapln2			Hapln2			Hapln2			Hapln2			Hapln2			Hapln2			Hapln2			Entpd3			Hapln2			Hapln2			Hapln2			Hapln2
Fat4			Fat4			Fat4			Fat4			Fat4			Fat4			Fat4			Gm42756			Fat4			Fat4			Fat4			Fat4
Rab37			Rab37			Rab37			Rab37			Rab37			Rab37			Rab37			Hapln2			Rab37			Rab37			Rab37			Rab37
Dpysl3			Dpysl3			Dpysl3			Dpysl3			Dpysl3			Dpysl3			Dpysl3			Fat4			Dpysl3			Dpysl3			Dpysl3			Dpysl3
Bnc2			Bnc2			Bnc2			Bnc2			Bnc2			Bnc2			Bnc2			Rab37			Bnc2			Bnc2			Bnc2			Bnc2
C230034O21Rik			C230034O21Rik			C230034O21Rik			C230034O21Rik			C230034O21Rik			C230034O21Rik			C230034O21Rik			Dpysl3			C230034O21Rik			C230034O21Rik			C230034O21Rik			C230034O21Rik
Syt2			Syt2			Syt2			Syt2			Syt2			Syt2			Syt2			Bnc2			Syt2			Syt2			Syt2			Syt2
Skap2			Skap2			Skap2			Skap2			Skap2			Skap2			Skap2			C230034O21Rik			Skap2			Skap2			Skap2			Skap2
Apol8			Apol8			Apol8			Apol8			Apol8			Apol8			Apol8			Syt2			Apol8			Apol8			Apol8			Apol8
Gm45441			Gm45441			Gm45441			Gm45441			Gm45441			Gm45441			Gm45441			Skap2			Gm45441			Gm45441			Gm45441			Gm45441
Grid2ip			Grid2ip			Grid2ip			Grid2ip			Grid2ip			Grid2ip			Grid2ip			Apol8			Grid2ip			Grid2ip			Grid2ip			Grid2ip
Tap2			Tap2			Tap2			Tap2			Tap2			Tap2			Tap2			Gm45441			Tap2			Tap2			Tap2			Tap2
Cast			Cast			Cast			Cast			Cast			Cast			Cast			Grid2ip			Cast			Cast			Cast			Cast
Lypd1			Lypd1			Lypd1			Lypd1			Lypd1			Lypd1			Lypd1			Tap2			Lypd1			Lypd1			Lypd1			Lypd1
Sox11			Sox11			Sox11			Sox11			Sox11			Sox11			Sox11			Cast			Sox11			Sox11			Sox11			Sox11
Frzb			Frzb			Frzb			Frzb			Frzb			Frzb			Frzb			Lypd1			Frzb			Frzb			Frzb			Frzb
Esyt1			Esyt1			Esyt1			Esyt1			Esyt1			Esyt1			Esyt1			Sox11			Esyt1			Esyt1			Esyt1			Esyt1
Lin28b			Lin28b			Lin28b			Lin28b			Lin28b			Lin28b			Lin28b			Frzb			Lin28b			Lin28b			Lin28b			Lin28b
Pcdhga6			Pcdhga6			Pcdhga6			Pcdhga6			Pcdhga6			Pcdhga6			Pcdhga6			Esyt1			Pcdhga6			Pcdhga6			Pcdhga6			Pcdhga6
Gm48530			Gm48530			Gm48530			Gm48530			Gm48530			Gm48530			Gm48530			Lin28b			Gm48530			Gm48530			Gm48530			Gm48530
Gm4900			Gm4900			Gm4900			Gm4900			Gm4900			Gm4900			Gm4900			Pcdhga6			Gm4900			Gm4900			Gm4900			Gm4900
Rnf207			Rnf207			Rnf207			Rnf207			Rnf207			Rnf207			Rnf207			Gm48530			Rnf207			Rnf207			Rnf207			Rnf207
6530403H02Rik			6530403H02Rik			6530403H02Rik			6530403H02Rik			6530403H02Rik			6530403H02Rik			6530403H02Rik			Gm4900			6530403H02Rik			6530403H02Rik			6530403H02Rik			6530403H02Rik
Marcks			Marcks			Marcks			Marcks			Marcks			Marcks			Marcks			Rnf207			Marcks			Marcks			Marcks			Marcks
Gm37452			Gm37452			Gm37452			Gm37452			Gm37452			Gm37452			Gm37452			6530403H02Rik			Gm37452			Gm37452			Gm37452			Gm37452
Calb1			Calb1			Calb1			Calb1			Calb1			Calb1			Calb1			Marcks			Calb1			Calb1			Calb1			Calb1
H2-K2			H2-K2			H2-K2			H2-K2			H2-K2			H2-K2			H2-K2			Gm37452			H2-K2			H2-K2			H2-K2			H2-K2
H2-D1			H2-D1			H2-D1			H2-D1			H2-D1			H2-D1			H2-D1			Calb1			H2-D1			H2-D1			H2-D1			H2-D1
Wfs1			Wfs1			Wfs1			Wfs1			Wfs1			Wfs1			Wfs1			H2-K2			Wfs1			Wfs1			Wfs1			Wfs1
Plppr4			Plppr4			Plppr4			Plppr4			Plppr4			Plppr4			Plppr4			H2-D1			Plppr4			Plppr4			Plppr4			Plppr4
Nectin3			Nectin3			Nectin3			Nectin3			Nectin3			Nectin3			Nectin3			Wfs1			Nectin3			Nectin3			Nectin3			Nectin3
Znf41-ps			Znf41-ps			Znf41-ps			Znf41-ps			Znf41-ps			Znf41-ps			Znf41-ps			Plppr4			Znf41-ps			Znf41-ps			Znf41-ps			Znf41-ps
Tnnt2			Tnnt2			Tnnt2			Tnnt2			Tnnt2			Tnnt2			Tnnt2			Nectin3			Tnnt2			Tnnt2			Tnnt2			Tnnt2
A330015K06Rik			A330015K06Rik			A330015K06Rik			A330015K06Rik			A330015K06Rik			A330015K06Rik			A330015K06Rik			Znf41-ps			A330015K06Rik			A330015K06Rik			A330015K06Rik			A330015K06Rik
Fbn2			Fbn2			Fbn2			Fbn2			Fbn2			Fbn2			Fbn2			Tnnt2			Fbn2			Fbn2			Fbn2			Fbn2
Flt3			Flt3			Flt3			Flt3			Flt3			Flt3			Flt3			A330015K06Rik			Flt3			Flt3			Flt3			Flt3
Klhl33			Klhl33			Klhl33			Klhl33			Klhl33			Klhl33			Klhl33			Fbn2			Klhl33			Klhl33			Klhl33			Klhl33
Pcdhb12			Pcdhb12			Pcdhb12			Pcdhb12			Pcdhb12			Pcdhb12			Pcdhb12			Flt3			Pcdhb12			Pcdhb12			Pcdhb12			Pcdhb12
Gm16233			Gm16233			Gm16233			Gm16233			Gm16233			Gm16233			Gm16233			Klhl33			Gm16233			Gm16233			Gm16233			Gm16233
Gpnmb			Gpnmb			Gpnmb			Gpnmb			Gpnmb			Gpnmb			Gpnmb			Pcdhb12			Gpnmb			Gpnmb			Gpnmb			Gpnmb
Ass1			Ass1			Ass1			Ass1			Ass1			Ass1			Ass1			Gm16233			Ass1			Ass1			Ass1			Ass1
Cacna2d1			Cacna2d1			Cacna2d1			Cacna2d1			Cacna2d1			Cacna2d1			Cacna2d1			Gpnmb			Cacna2d1			Cacna2d1			Cacna2d1			Cacna2d1
Camk4			Camk4			Camk4			Camk4			Camk4			Camk4			Camk4			Ass1			Camk4			Camk4			Camk4			Camk4
Spef2			Spef2			Spef2			Spef2			Spef2			Spef2			Spef2			Cacna2d1			Spef2			Spef2			Spef2			Spef2
Gm45104			Gm45104			Gm45104			Gm45104			Gm45104			Gm45104			Gm45104			Camk4			Gm45104			Gm45104			Gm45104			Gm45104
Lrrtm4			Lrrtm4			Lrrtm4			Lrrtm4			Lrrtm4			Lrrtm4			Lrrtm4			Spef2			Lrrtm4			Lrrtm4			Lrrtm4			Lrrtm4
Lingo2			Lingo2			Lingo2			Lingo2			Lingo2			Lingo2			Lingo2			Gm45104			Lingo2			Lingo2			Lingo2			Lingo2
Sertm1			Sertm1			Sertm1			Sertm1			Sertm1			Sertm1			Sertm1			Lrrtm4			Sertm1			Sertm1			Sertm1			Sertm1
Sec14l5			Sec14l5			Sec14l5			Sec14l5			Sec14l5			Sec14l5			Sec14l5			Lingo2			Sec14l5			Sec14l5			Sec14l5			Sec14l5
Pcdhb13			Pcdhb13			Pcdhb13			Pcdhb13			Pcdhb13			Pcdhb13			Pcdhb13			Sertm1			Pcdhb13			Pcdhb13			Pcdhb13			Pcdhb13
Nrep			Nrep			Nrep			Nrep			Nrep			Nrep			Nrep			Sec14l5			Nrep			Nrep			Nrep			Nrep
Cd55			Cd55			Cd55			Cd55			Cd55			Cd55			Cd55			Pcdhb13			Cd55			Cd55			Cd55			Cd55
Dmkn			Dmkn			Dmkn			Dmkn			Dmkn			Dmkn			Dmkn			Nrep			Dmkn			Dmkn			Dmkn			Dmkn
Fam184b			Fam184b			Fam184b			Fam184b			Fam184b			Fam184b			Fam184b			Cd55			Fam184b			Fam184b			Fam184b			Fam184b
Ank1			Ank1			Ank1			Ank1			Ank1			Ank1			Ank1			Dmkn			Ank1			Ank1			Ank1			Ank1
Anln			Anln			Anln			Anln			Anln			Anln			Anln			Fam184b			Anln			Anln			Anln			Anln
Gal3st3			Gal3st3			Gal3st3			Gal3st3			Gal3st3			Gal3st3			Gal3st3			Ank1			Gal3st3			Gal3st3			Gal3st3			Gal3st3
Dusp18			Dusp18			Dusp18			Dusp18			Dusp18			Dusp18			Dusp18			Anln			Dusp18			Dusp18			Dusp18			Dusp18
Gm40331			Gm40331			Gm40331			Gm40331			Gm40331			Gm40331			Gm40331			Gal3st3			Gm40331			Gm40331			Gm40331			Gm40331
Gpr17			Gpr17			Gpr17			Gpr17			Gpr17			Gpr17			Gpr17			Dusp18			Gpr17			Gpr17			Gpr17			Gpr17
Lpl			Lpl			Lpl			Lpl			Lpl			Lpl			Lpl			Gm40331			Lpl			Lpl			Lpl			Lpl
Ncan			Ncan			Ncan			Ncan			Ncan			Ncan			Ncan			Gpr17			Ncan			Ncan			Ncan			Ncan
Cadm2			Cadm2			Cadm2			Cadm2			Cadm2			Cadm2			Cadm2			Lpl			Cadm2			Cadm2			Cadm2			Cadm2
Eda			Eda			Eda			Eda			Eda			Eda			Eda			Ncan			Eda			Eda			Eda			Eda
Pcsk6			Pcsk6			Pcsk6			Pcsk6			Pcsk6			Pcsk6			Pcsk6			Cadm2			Pcsk6			Pcsk6			Pcsk6			Pcsk6
Ace			Ace			Ace			Ace			Ace			Ace			Ace			Eda			Ace			Ace			Ace			Ace
Ttc39a			Ttc39a			Ttc39a			Ttc39a			Ttc39a			Ttc39a			Ttc39a			Pcsk6			Ttc39a			Ttc39a			Ttc39a			Ttc39a
Hrk			Hrk			Hrk			Hrk			Hrk			Hrk			Hrk			Ace			Hrk			Hrk			Hrk			Hrk
Syt17			Syt17			Syt17			Syt17			Syt17			Syt17			Syt17			Ttc39a			Syt17			Syt17			Syt17			Syt17
B230312C02Rik			B230312C02Rik			B230312C02Rik			B230312C02Rik			B230312C02Rik			B230312C02Rik			B230312C02Rik			Hrk			B230312C02Rik			B230312C02Rik			B230312C02Rik			B230312C02Rik
Zbbx			Zbbx			Zbbx			Zbbx			Zbbx			Zbbx			Zbbx			Syt17			Zbbx			Zbbx			Zbbx			Zbbx
Cbx7			Cbx7			Cbx7			Cbx7			Cbx7			Cbx7			Cbx7			B230312C02Rik			Cbx7			Cbx7			Cbx7			Cbx7
Exoc3l4			Exoc3l4			Exoc3l4			Exoc3l4			Exoc3l4			Exoc3l4			Exoc3l4			Zbbx			Exoc3l4			Exoc3l4			Exoc3l4			Exoc3l4
H2-K1			H2-K1			H2-K1			H2-K1			H2-K1			H2-K1			H2-K1			Cbx7			H2-K1			H2-K1			H2-K1			H2-K1
Fgfbp3			Fgfbp3			Fgfbp3			Fgfbp3			Fgfbp3			Fgfbp3			Fgfbp3			Exoc3l4			Fgfbp3			Fgfbp3			Fgfbp3			Fgfbp3
Olfr316			Olfr316			Olfr316			Olfr316			Olfr316			Olfr316			Olfr316			H2-K1			Olfr316			Olfr316			Olfr316			Olfr316
Parp12			Parp12			Parp12			Parp12			Parp12			Parp12			Parp12			Fgfbp3			Parp12			Parp12			Parp12			Parp12
D430019H16Rik			D430019H16Rik			D430019H16Rik			D430019H16Rik			D430019H16Rik			D430019H16Rik			D430019H16Rik			Olfr316			D430019H16Rik			D430019H16Rik			D430019H16Rik			D430019H16Rik
Tnc			Tnc			Tnc			Tnc			Tnc			Tnc			Tnc			Parp12			Tnc			Tnc			Tnc			Tnc
Esr1			Esr1			Esr1			Esr1			Esr1			Esr1			Esr1			D430019H16Rik			Esr1			Esr1			Esr1			Esr1
Rgs20			Rgs20			Rgs20			Rgs20			Rgs20			Rgs20			Rgs20			Tnc			Rgs20			Rgs20			Rgs20			Rgs20
Tafa1			Tafa1			Tafa1			Tafa1			Tafa1			Tafa1			Tafa1			Esr1			Tafa1			Tafa1			Tafa1			Tafa1
Gm40466			Gm40466			Gm40466			Gm40466			Gm40466			Gm40466			Gm40466			Rgs20			Gm40466			Gm40466			Gm40466			Gm40466
Colq			Colq			Colq			Colq			Colq			Colq			Colq			Tafa1			Colq			Colq			Colq			Colq
Sec1			Sec1			Sec1			Sec1			Sec1			Sec1			Sec1			Gm40466			Sec1			Sec1			Sec1			Sec1
Smarca1			Smarca1			Smarca1			Smarca1			Smarca1			Smarca1			Smarca1			Colq			Smarca1			Smarca1			Smarca1			Smarca1
Cd274			Cd274			Cd274			Cd274			Cd274			Cd274			Cd274			Sec1			Cd274			Cd274			Cd274			Cd274
Vat1l			Vat1l			Vat1l			Vat1l			Vat1l			Vat1l			Vat1l			Smarca1			Vat1l			Vat1l			Vat1l			Vat1l
Adam19			Adam19			Adam19			Adam19			Adam19			Adam19			Adam19			Cd274			Adam19			Adam19			Adam19			Adam19
Slit2			Slit2			Slit2			Slit2			Slit2			Slit2			Slit2			Vat1l			Slit2			Slit2			Slit2			Slit2
Sowaha			Sowaha			Sowaha			Sowaha			Sowaha			Sowaha			Sowaha			Adam19			Sowaha			Sowaha			Sowaha			Sowaha
Susd5			Susd5			Susd5			Susd5			Susd5			Susd5			Susd5			Slit2			Susd5			Susd5			Susd5			Susd5
Klhdc7b			Klhdc7b			Klhdc7b			Klhdc7b			Klhdc7b			Klhdc7b			Klhdc7b			Sowaha			Klhdc7b			Klhdc7b			Klhdc7b			Klhdc7b
Gm20063			Gm20063			Gm20063			Gm20063			Gm20063			Gm20063			Gm20063			Susd5			Gm20063			Gm20063			Gm20063			Gm20063
Lamb1			Lamb1			Lamb1			Lamb1			Lamb1			Lamb1			Lamb1			Klhdc7b			Lamb1			Lamb1			Lamb1			Lamb1
Gprin3			Gprin3			Gprin3			Gprin3			Gprin3			Gprin3			Gprin3			Gm20063			Gprin3			Gprin3			Gprin3			Gprin3
Kcnq4			Kcnq4			Kcnq4			Kcnq4			Kcnq4			Kcnq4			Kcnq4			Lamb1			Kcnq4			Kcnq4			Kcnq4			Kcnq4
Lrrc3			Lrrc3			Lrrc3			Lrrc3			Lrrc3			Lrrc3			Lrrc3			Gprin3			Lrrc3			Lrrc3			Lrrc3			Lrrc3
Col2a1			Col2a1			Col2a1			Col2a1			Col2a1			Col2a1			Col2a1			Kcnq4			Col2a1			Col2a1			Col2a1			Col2a1
Ppl			Ppl			Ppl			Ppl			Ppl			Ppl			Ppl			Lrrc3			Ppl			Ppl			Ppl			Ppl
Scn10a			Scn10a			Scn10a			Scn10a			Scn10a			Scn10a			Scn10a			Col2a1			Scn10a			Scn10a			Scn10a			Scn10a
Tmem63a			Tmem63a			Tmem63a			Tmem63a			Tmem63a			Tmem63a			Tmem63a			Ppl			Tmem63a			Tmem63a			Tmem63a			Tmem63a
Otof			Otof			Otof			Otof			Otof			Otof			Otof			Scn10a			Otof			Otof			Otof			Otof
Dclk3			Dclk3			Dclk3			Dclk3			Dclk3			Dclk3			Dclk3			Tmem63a			Dclk3			Dclk3			Dclk3			Dclk3
Gm17322			Gm17322			Gm17322			Gm17322			Gm17322			Gm17322			Gm17322			Otof			Gm17322			Gm17322			Gm17322			Gm17322
Dgkb			Dgkb			Dgkb			Dgkb			Dgkb			Dgkb			Dgkb			Dclk3			Dgkb			Dgkb			Dgkb			Dgkb
C2cd4c			C2cd4c			C2cd4c			C2cd4c			C2cd4c			C2cd4c			C2cd4c			Gm17322			C2cd4c			C2cd4c			C2cd4c			C2cd4c
Adamts16			Adamts16			Adamts16			Adamts16			Adamts16			Adamts16			Adamts16			Dgkb			Adamts16			Adamts16			Adamts16			Adamts16
Stox1			Stox1			Stox1			Stox1			Stox1			Stox1			Stox1			C2cd4c			Stox1			Stox1			Stox1			Stox1
Cyp2e1			Cyp2e1			Cyp2e1			Cyp2e1			Cyp2e1			Cyp2e1			Cyp2e1			Adamts16			Cyp2e1			Cyp2e1			Cyp2e1			Cyp2e1
Stat6			Stat6			Stat6			Stat6			Stat6			Stat6			Stat6			Stox1			Stat6			Stat6			Stat6			Stat6
Col3a1			Col3a1			Col3a1			Col3a1			Col3a1			Col3a1			Col3a1			Cyp2e1			Col3a1			Col3a1			Col3a1			Col3a1
Bdkrb2			Bdkrb2			Bdkrb2			Bdkrb2			Bdkrb2			Bdkrb2			Bdkrb2			Stat6			Bdkrb2			Bdkrb2			Bdkrb2			Bdkrb2
Ret			Ret			Ret			Ret			Ret			Ret			Ret			Col3a1			Ret			Ret			Ret			Ret
Ripor2			Ripor2			Ripor2			Ripor2			Ripor2			Ripor2			Ripor2			Bdkrb2			Ripor2			Ripor2			Ripor2			Ripor2
Pcdh8			Pcdh8			Pcdh8			Pcdh8			Pcdh8			Pcdh8			Pcdh8			Ret			Pcdh8			Pcdh8			Pcdh8			Pcdh8
2410018L13Rik			2410018L13Rik			2410018L13Rik			2410018L13Rik			2410018L13Rik			2410018L13Rik			2410018L13Rik			Ripor2			2410018L13Rik			2410018L13Rik			2410018L13Rik			2410018L13Rik
Gm16083			Gm16083			Gm16083			Gm16083			Gm16083			Gm16083			Gm16083			Pcdh8			Gm16083			Gm16083			Gm16083			Gm16083
Gm12371			Gm12371			Gm12371			Gm12371			Gm12371			Gm12371			Gm12371			2410018L13Rik			Gm12371			Gm12371			Gm12371			Gm12371
9330121K16Rik			9330121K16Rik			9330121K16Rik			9330121K16Rik			9330121K16Rik			9330121K16Rik			9330121K16Rik			Gm16083			9330121K16Rik			9330121K16Rik			9330121K16Rik			9330121K16Rik
Ifi27			Ifi27			Ifi27			Ifi27			Ifi27			Ifi27			Ifi27			Gm12371			Ifi27			Ifi27			Ifi27			Ifi27
Dyrk2			Dyrk2			Dyrk2			Dyrk2			Dyrk2			Dyrk2			Dyrk2			9330121K16Rik			Dyrk2			Dyrk2			Dyrk2			Dyrk2
Gm37827			Gm37827			Gm37827			Gm37827			Gm37827			Gm37827			Gm37827			Ifi27			Gm37827			Gm37827			Gm37827			Gm37827
Gipc3			Gipc3			Gipc3			Gipc3			Gipc3			Gipc3			Gipc3			Dyrk2			Gipc3			Gipc3			Gipc3			Gipc3
Itih3			Itih3			Itih3			Itih3			Itih3			Itih3			Itih3			Gm37827			Itih3			Itih3			Itih3			Itih3
Fcrls			Fcrls			Fcrls			Fcrls			Fcrls			Fcrls			Fcrls			Gipc3			Fcrls			Fcrls			Fcrls			Fcrls
Brinp2			Brinp2			Brinp2			Brinp2			Brinp2			Brinp2			Brinp2			Itih3			Brinp2			Brinp2			Brinp2			Brinp2
Bhlhe22			Bhlhe22			Bhlhe22			Bhlhe22			Bhlhe22			Bhlhe22			Bhlhe22			Fcrls			Bhlhe22			Bhlhe22			Bhlhe22			Bhlhe22
H2-Q4			H2-Q4			H2-Q4			H2-Q4			H2-Q4			H2-Q4			H2-Q4			Brinp2			H2-Q4			H2-Q4			H2-Q4			H2-Q4
Pcdh19			Pcdh19			Pcdh19			Pcdh19			Pcdh19			Pcdh19			Pcdh19			Bhlhe22			Pcdh19			Pcdh19			Pcdh19			Pcdh19
Pcdhga7			Pcdhga7			Pcdhga7			Pcdhga7			Pcdhga7			Pcdhga7			Pcdhga7			H2-Q4			Pcdhga7			Pcdhga7			Pcdhga7			Pcdhga7
Fbxw23			Fbxw23			Fbxw23			Fbxw23			Fbxw23			Fbxw23			Fbxw23			Pcdh19			Fbxw23			Fbxw23			Fbxw23			Fbxw23
Kcng1			Kcng1			Kcng1			Kcng1			Kcng1			Kcng1			Kcng1			Pcdhga7			Kcng1			Kcng1			Kcng1			Kcng1
Camta1			Camta1			Camta1			Camta1			Camta1			Camta1			Camta1			Fbxw23			Camta1			Camta1			Camta1			Camta1
Gatm			Gatm			Gatm			Gatm			Gatm			Gatm			Gatm			Kcng1			Gatm			Gatm			Gatm			Gatm
Sfmbt2			Sfmbt2			Sfmbt2			Sfmbt2			Sfmbt2			Sfmbt2			Sfmbt2			Camta1			Sfmbt2			Sfmbt2			Sfmbt2			Sfmbt2
Rfx3			Rfx3			Rfx3			Rfx3			Rfx3			Rfx3			Rfx3			Gatm			Rfx3			Rfx3			Rfx3			Rfx3
Vamp1			Vamp1			Vamp1			Vamp1			Vamp1			Vamp1			Vamp1			Sfmbt2			Vamp1			Vamp1			Vamp1			Vamp1
Klhl2			Klhl2			Klhl2			Klhl2			Klhl2			Klhl2			Klhl2			Rfx3			Klhl2			Klhl2			Klhl2			Klhl2
Vwa5b1			Vwa5b1			Vwa5b1			Vwa5b1			Vwa5b1			Vwa5b1			Vwa5b1			Vamp1			Vwa5b1			Vwa5b1			Vwa5b1			Vwa5b1
Lix1			Lix1			Lix1			Lix1			Lix1			Lix1			Lix1			Klhl2			Lix1			Lix1			Lix1			Lix1
Akr1c18			Akr1c18			Akr1c18			Akr1c18			Akr1c18			Akr1c18			Akr1c18			Vwa5b1			Akr1c18			Akr1c18			Akr1c18			Akr1c18
Fbxl16			Fbxl16			Fbxl16			Fbxl16			Fbxl16			Fbxl16			Fbxl16			Lix1			Fbxl16			Fbxl16			Fbxl16			Fbxl16
Parp4			Parp4			Parp4			Parp4			Parp4			Parp4			Parp4			Akr1c18			Parp4			Parp4			Parp4			Parp4
Cyp11a1			Cyp11a1			Cyp11a1			Cyp11a1			Cyp11a1			Cyp11a1			Cyp11a1			Fbxl16			Cyp11a1			Cyp11a1			Cyp11a1			Cyp11a1
Ypel1			Ypel1			Ypel1			Ypel1			Ypel1			Ypel1			Ypel1			Parp4			Ypel1			Ypel1			Ypel1			Ypel1
A230001M10Rik			A230001M10Rik			A230001M10Rik			A230001M10Rik			A230001M10Rik			A230001M10Rik			A230001M10Rik			Cyp11a1			A230001M10Rik			A230001M10Rik			A230001M10Rik			A230001M10Rik
Nectin4			Nectin4			Nectin4			Nectin4			Nectin4			Nectin4			Nectin4			Ypel1			Nectin4			Nectin4			Nectin4			Nectin4
Actn2			Actn2			Actn2			Actn2			Actn2			Actn2			Actn2			A230001M10Rik			Actn2			Actn2			Actn2			Actn2
Tiam2			Tiam2			Tiam2			Tiam2			Tiam2			Tiam2			Tiam2			Nectin4			Tiam2			Tiam2			Tiam2			Tiam2
Wwox			Wwox			Wwox			Wwox			Wwox			Wwox			Wwox			Actn2			Wwox			Wwox			Wwox			Wwox
Tmem132a			Tmem132a			Tmem132a			Tmem132a			Tmem132a			Tmem132a			Tmem132a			Tiam2			Tmem132a			Tmem132a			Tmem132a			Tmem132a
Arhgap6			Arhgap6			Arhgap6			Arhgap6			Arhgap6			Arhgap6			Arhgap6			Wwox			Arhgap6			Arhgap6			Arhgap6			Arhgap6
Pcdhb7			Pcdhb7			Pcdhb7			Pcdhb7			Pcdhb7			Pcdhb7			Pcdhb7			Tmem132a			Pcdhb7			Pcdhb7			Pcdhb7			Pcdhb7
Pcdhga4			Pcdhga4			Pcdhga4			Pcdhga4			Pcdhga4			Pcdhga4			Pcdhga4			Arhgap6			Pcdhga4			Pcdhga4			Pcdhga4			Pcdhga4
Ankub1			Ankub1			Ankub1			Ankub1			Ankub1			Ankub1			Ankub1			Pcdhb7			Ankub1			Ankub1			Ankub1			Ankub1
Kndc1			Kndc1			Kndc1			Kndc1			Kndc1			Kndc1			Kndc1			Pcdhga4			Kndc1			Kndc1			Kndc1			Kndc1
Fgf13			Fgf13			Fgf13			Fgf13			Fgf13			Fgf13			Fgf13			Ankub1			Fgf13			Fgf13			Fgf13			Fgf13
Zfp365			Zfp365			Zfp365			Zfp365			Zfp365			Zfp365			Zfp365			Kndc1			Zfp365			Zfp365			Zfp365			Zfp365
Myh7			Myh7			Myh7			Myh7			Myh7			Myh7			Myh7			Fgf13			Myh7			Myh7			Myh7			Myh7
Prkar2b			Prkar2b			Prkar2b			Prkar2b			Prkar2b			Prkar2b			Prkar2b			Zfp365			Prkar2b			Prkar2b			Prkar2b			Prkar2b
Cyp39a1			Cyp39a1			Cyp39a1			Cyp39a1			Cyp39a1			Cyp39a1			Cyp39a1			Myh7			Cyp39a1			Cyp39a1			Cyp39a1			Cyp39a1
Nol4			Nol4			Nol4			Nol4			Nol4			Nol4			Nol4			Prkar2b			Nol4			Nol4			Nol4			Nol4
Icam5			Icam5			Icam5			Icam5			Icam5			Icam5			Icam5			Cyp39a1			Icam5			Icam5			Icam5			Icam5
St18			St18			St18			St18			St18			St18			St18			Nol4			St18			St18			St18			St18
Cyp46a1			Cyp46a1			Cyp46a1			Cyp46a1			Cyp46a1			Cyp46a1			Cyp46a1			Icam5			Cyp46a1			Cyp46a1			Cyp46a1			Cyp46a1
Efcab5			Efcab5			Efcab5			Efcab5			Efcab5			Efcab5			Efcab5			St18			Efcab5			Efcab5			Efcab5			Efcab5
Galnt6			Galnt6			Galnt6			Galnt6			Galnt6			Galnt6			Galnt6			Cyp46a1			Galnt6			Galnt6			Galnt6			Galnt6
Tmem25			Tmem25			Tmem25			Tmem25			Tmem25			Tmem25			Tmem25			Efcab5			Tmem25			Tmem25			Tmem25			Tmem25
Tnnc1			Tnnc1			Tnnc1			Tnnc1			Tnnc1			Tnnc1			Tnnc1			Galnt6			Tnnc1			Tnnc1			Tnnc1			Tnnc1
Ube2nl			Ube2nl			Ube2nl			Ube2nl			Ube2nl			Ube2nl			Ube2nl			Tmem25			Ube2nl			Ube2nl			Ube2nl			Ube2nl
Hpcal4			Hpcal4			Hpcal4			Hpcal4			Hpcal4			Hpcal4			Hpcal4			Tnnc1			Hpcal4			Hpcal4			Hpcal4			Hpcal4
Spink10			Spink10			Spink10			Spink10			Spink10			Spink10			Spink10			Ube2nl			Spink10			Spink10			Spink10			Spink10
Slc4a7			Slc4a7			Slc4a7			Slc4a7			Slc4a7			Slc4a7			Slc4a7			Hpcal4			Slc4a7			Slc4a7			Slc4a7			Slc4a7
Bglap3			Bglap3			Bglap3			Bglap3			Bglap3			Bglap3			Bglap3			Spink10			Bglap3			Bglap3			Bglap3			Bglap3
Gm10800			Gm10800			Gm10800			Gm10800			Gm10800			Gm10800			Gm10800			Slc4a7			Gm10800			Gm10800			Gm10800			Gm10800
P2rx6			P2rx6			P2rx6			P2rx6			P2rx6			P2rx6			P2rx6			Bglap3			P2rx6			P2rx6			P2rx6			P2rx6
Cfap46			Cfap46			Cfap46			Cfap46			Cfap46			Cfap46			Cfap46			Gm10800			Cfap46			Cfap46			Cfap46			Cfap46
B3galt5			B3galt5			B3galt5			B3galt5			B3galt5			B3galt5			B3galt5			P2rx6			B3galt5			B3galt5			B3galt5			B3galt5
Ptprf			Ptprf			Ptprf			Ptprf			Ptprf			Ptprf			Ptprf			Cfap46			Ptprf			Ptprf			Ptprf			Ptprf
Ust			Ust			Ust			Ust			Ust			Ust			Ust			B3galt5			Ust			Ust			Ust			Ust
Rasgef1a			Rasgef1a			Rasgef1a			Rasgef1a			Rasgef1a			Rasgef1a			Rasgef1a			Ptprf			Rasgef1a			Rasgef1a			Rasgef1a			Rasgef1a
Adamtsl5			Adamtsl5			Adamtsl5			Adamtsl5			Adamtsl5			Adamtsl5			Adamtsl5			Ust			Adamtsl5			Adamtsl5			Adamtsl5			Adamtsl5
Slc29a4			Slc29a4			Slc29a4			Slc29a4			Slc29a4			Slc29a4			Slc29a4			Rasgef1a			Slc29a4			Slc29a4			Slc29a4			Slc29a4
Galnt16			Galnt16			Galnt16			Galnt16			Galnt16			Galnt16			Galnt16			Adamtsl5			Galnt16			Galnt16			Galnt16			Galnt16
B230206H07Rik			B230206H07Rik			B230206H07Rik			B230206H07Rik			B230206H07Rik			B230206H07Rik			B230206H07Rik			Slc29a4			B230206H07Rik			B230206H07Rik			B230206H07Rik			B230206H07Rik
Nwd2			Nwd2			Nwd2			Nwd2			Nwd2			Nwd2			Nwd2			Galnt16			Nwd2			Nwd2			Nwd2			Nwd2
Pcdhga9			Pcdhga9			Pcdhga9			Pcdhga9			Pcdhga9			Pcdhga9			Pcdhga9			B230206H07Rik			Pcdhga9			Pcdhga9			Pcdhga9			Pcdhga9
Wwc2			Wwc2			Wwc2			Wwc2			Wwc2			Wwc2			Wwc2			Nwd2			Wwc2			Wwc2			Wwc2			Wwc2
Robo1			Robo1			Robo1			Robo1			Robo1			Robo1			Robo1			Pcdhga9			Robo1			Robo1			Robo1			Robo1
Gm20162			Gm20162			Gm20162			Gm20162			Gm20162			Gm20162			Gm20162			Wwc2			Gm20162			Gm20162			Gm20162			Gm20162
Tap1			Tap1			Tap1			Tap1			Tap1			Tap1			Tap1			Robo1			Tap1			Tap1			Tap1			Tap1
Fat2			Fat2			Fat2			Fat2			Fat2			Fat2			Fat2			Gm20162			Fat2			Fat2			Fat2			Fat2
Rgs14			Rgs14			Rgs14			Rgs14			Rgs14			Rgs14			Rgs14			Tap1			Rgs14			Rgs14			Rgs14			Rgs14
Dio2			Dio2			Dio2			Dio2			Dio2			Dio2			Dio2			Fat2			Dio2			Dio2			Dio2			Dio2
Ints6l			Ints6l			Ints6l			Ints6l			Ints6l			Ints6l			Ints6l			Rgs14			Ints6l			Ints6l			Ints6l			Ints6l
Cyp27a1			Cyp27a1			Cyp27a1			Cyp27a1			Cyp27a1			Cyp27a1			Cyp27a1			Dio2			Cyp27a1			Cyp27a1			Cyp27a1			Cyp27a1
B4galt2			B4galt2			B4galt2			B4galt2			B4galt2			B4galt2			B4galt2			Ints6l			B4galt2			B4galt2			B4galt2			B4galt2
Chl1			Chl1			Chl1			Chl1			Chl1			Chl1			Chl1			Cyp27a1			Chl1			Chl1			Chl1			Chl1
Zfp677			Zfp677			Zfp677			Zfp677			Zfp677			Zfp677			Zfp677			B4galt2			Zfp677			Zfp677			Zfp677			Zfp677
Galnt3			Galnt3			Galnt3			Galnt3			Galnt3			Galnt3			Galnt3			Chl1			Galnt3			Galnt3			Galnt3			Galnt3
Hjurp			Hjurp			Hjurp			Hjurp			Hjurp			Hjurp			Hjurp			Zfp677			Hjurp			Hjurp			Hjurp			Hjurp
Gm7967			Gm7967			Gm7967			Gm7967			Gm7967			Gm7967			Gm7967			Galnt3			Gm7967			Gm7967			Gm7967			Gm7967
Nbl1			Nbl1			Nbl1			Nbl1			Nbl1			Nbl1			Nbl1			Hjurp			Nbl1			Nbl1			Nbl1			Nbl1
Chmp4c			Chmp4c			Chmp4c			Chmp4c			Chmp4c			Chmp4c			Chmp4c			Gm7967			Chmp4c			Chmp4c			Chmp4c			Chmp4c
Plxdc1			Plxdc1			Plxdc1			Plxdc1			Plxdc1			Plxdc1			Plxdc1			Nbl1			Plxdc1			Plxdc1			Plxdc1			Plxdc1
Aldh1a3			Aldh1a3			Aldh1a3			Aldh1a3			Aldh1a3			Aldh1a3			Aldh1a3			Chmp4c			Aldh1a3			Aldh1a3			Aldh1a3			Aldh1a3
Trabd2b			Trabd2b			Trabd2b			Trabd2b			Trabd2b			Trabd2b			Trabd2b			Plxdc1			Trabd2b			Trabd2b			Trabd2b			Trabd2b
Slc16a7			Slc16a7			Slc16a7			Slc16a7			Slc16a7			Slc16a7			Slc16a7			Aldh1a3			Slc16a7			Slc16a7			Slc16a7			Slc16a7
Gpld1			Gpld1			Gpld1			Gpld1			Gpld1			Gpld1			Gpld1			Trabd2b			Gpld1			Gpld1			Gpld1			Gpld1
Tanc1			Tanc1			Tanc1			Tanc1			Tanc1			Tanc1			Tanc1			Slc16a7			Tanc1			Tanc1			Tanc1			Tanc1
Rgs4			Rgs4			Rgs4			Rgs4			Rgs4			Rgs4			Rgs4			Gpld1			Rgs4			Rgs4			Rgs4			Rgs4
B230334C09Rik			B230334C09Rik			B230334C09Rik			B230334C09Rik			B230334C09Rik			B230334C09Rik			B230334C09Rik			Tanc1			B230334C09Rik			B230334C09Rik			B230334C09Rik			B230334C09Rik
Zfp516			Zfp516			Zfp516			Zfp516			Zfp516			Zfp516			Zfp516			Rgs4			Zfp516			Zfp516			Zfp516			Zfp516
2310002F09Rik			2310002F09Rik			2310002F09Rik			2310002F09Rik			2310002F09Rik			2310002F09Rik			2310002F09Rik			B230334C09Rik			2310002F09Rik			2310002F09Rik			2310002F09Rik			2310002F09Rik
Gm3693			Gm3693			Gm3693			Gm3693			Gm3693			Gm3693			Gm3693			Zfp516			Gm3693			Gm3693			Gm3693			Gm3693
Dsel			Dsel			Dsel			Dsel			Dsel			Dsel			Dsel			2310002F09Rik			Dsel			Dsel			Dsel			Dsel
E530001F21Rik			E530001F21Rik			E530001F21Rik			E530001F21Rik			E530001F21Rik			E530001F21Rik			E530001F21Rik			Gm3693			E530001F21Rik			E530001F21Rik			E530001F21Rik			E530001F21Rik
Pcdhgc5			Pcdhgc5			Pcdhgc5			Pcdhgc5			Pcdhgc5			Pcdhgc5			Pcdhgc5			Dsel			Pcdhgc5			Pcdhgc5			Pcdhgc5			Pcdhgc5
9330199G10Rik			9330199G10Rik			9330199G10Rik			9330199G10Rik			9330199G10Rik			9330199G10Rik			9330199G10Rik			E530001F21Rik			9330199G10Rik			9330199G10Rik			9330199G10Rik			9330199G10Rik
Slc38a4			Slc38a4			Slc38a4			Slc38a4			Slc38a4			Slc38a4			Slc38a4			Pcdhgc5			Slc38a4			Slc38a4			Slc38a4			Slc38a4
Kcnn3			Kcnn3			Kcnn3			Kcnn3			Kcnn3			Kcnn3			Kcnn3			9330199G10Rik			Kcnn3			Kcnn3			Kcnn3			Kcnn3
Col5a2			Col5a2			Col5a2			Col5a2			Col5a2			Col5a2			Col5a2			Slc38a4			Col5a2			Col5a2			Col5a2			Col5a2
Trf			Trf			Trf			Trf			Trf			Trf			Trf			Kcnn3			Trf			Trf			Trf			Trf
Nlrc5			Nlrc5			Nlrc5			Nlrc5			Nlrc5			Nlrc5			Nlrc5			Col5a2			Nlrc5			Nlrc5			Nlrc5			Nlrc5
Camkv			Camkv			Camkv			Camkv			Camkv			Camkv			Camkv			Trf			Camkv			Camkv			Camkv			Camkv
Ntn5			Ntn5			Ntn5			Ntn5			Ntn5			Ntn5			Ntn5			Nlrc5			Ntn5			Ntn5			Ntn5			Ntn5
Asb16			Asb16			Asb16			Asb16			Asb16			Asb16			Asb16			Camkv			Asb16			Asb16			Asb16			Asb16
Lct			Lct			Lct			Lct			Lct			Lct			Lct			Ntn5			Lct			Lct			Lct			Lct
Syt16			Syt16			Syt16			Syt16			Syt16			Syt16			Syt16			Asb16			Syt16			Syt16			Syt16			Syt16
Doc2b			Doc2b			Doc2b			Doc2b			Doc2b			Doc2b			Doc2b			Lct			Doc2b			Doc2b			Doc2b			Doc2b
Zfp518a			Zfp518a			Zfp518a			Zfp518a			Zfp518a			Zfp518a			Zfp518a			Syt16			Zfp518a			Zfp518a			Zfp518a			Zfp518a
Col25a1			Col25a1			Col25a1			Col25a1			Col25a1			Col25a1			Col25a1			Doc2b			Col25a1			Col25a1			Col25a1			Col25a1
Sema3f			Sema3f			Sema3f			Sema3f			Sema3f			Sema3f			Sema3f			Zfp518a			Sema3f			Sema3f			Sema3f			Sema3f
Kirrel3			Kirrel3			Kirrel3			Kirrel3			Kirrel3			Kirrel3			Kirrel3			Col25a1			Kirrel3			Kirrel3			Kirrel3			Kirrel3
Ankdd1b			Ankdd1b			Ankdd1b			Ankdd1b			Ankdd1b			Ankdd1b			Ankdd1b			Sema3f			Ankdd1b			Ankdd1b			Ankdd1b			Ankdd1b
Lrrc7			Lrrc7			Lrrc7			Lrrc7			Lrrc7			Lrrc7			Lrrc7			Kirrel3			Lrrc7			Lrrc7			Lrrc7			Lrrc7
Arhgap20			Arhgap20			Arhgap20			Arhgap20			Arhgap20			Arhgap20			Arhgap20			Ankdd1b			Arhgap20			Arhgap20			Arhgap20			Arhgap20
Scn3a			Scn3a			Scn3a			Scn3a			Scn3a			Scn3a			Scn3a			Lrrc7			Scn3a			Scn3a			Scn3a			Scn3a
Smarca5-ps			Smarca5-ps			Smarca5-ps			Smarca5-ps			Smarca5-ps			Smarca5-ps			Smarca5-ps			Arhgap20			Smarca5-ps			Smarca5-ps			Smarca5-ps			Smarca5-ps
C030029H02Rik			C030029H02Rik			C030029H02Rik			C030029H02Rik			C030029H02Rik			C030029H02Rik			C030029H02Rik			Scn3a			C030029H02Rik			C030029H02Rik			C030029H02Rik			C030029H02Rik
Ppp1r3g			Ppp1r3g			Ppp1r3g			Ppp1r3g			Ppp1r3g			Ppp1r3g			Ppp1r3g			Smarca5-ps			Ppp1r3g			Ppp1r3g			Ppp1r3g			Ppp1r3g
Olfml3			Olfml3			Olfml3			Olfml3			Olfml3			Olfml3			Olfml3			C030029H02Rik			Olfml3			Olfml3			Olfml3			Olfml3
Syde2			Syde2			Syde2			Syde2			Syde2			Syde2			Syde2			Ppp1r3g			Syde2			Syde2			Syde2			Syde2
Myrf			Myrf			Myrf			Myrf			Myrf			Myrf			Myrf			Olfml3			Myrf			Myrf			Myrf			Myrf
Csf1r			Csf1r			Csf1r			Csf1r			Csf1r			Csf1r			Csf1r			Syde2			Csf1r			Csf1r			Csf1r			Csf1r
Olfm1			Olfm1			Olfm1			Olfm1			Olfm1			Olfm1			Olfm1			Myrf			Olfm1			Olfm1			Olfm1			Olfm1
Ccdc82			Ccdc82			Ccdc82			Ccdc82			Ccdc82			Ccdc82			Ccdc82			Csf1r			Ccdc82			Ccdc82			Ccdc82			Ccdc82
Gm46400			Gm46400			Gm46400			Gm46400			Gm46400			Gm46400			Gm46400			Olfm1			Gm46400			Gm46400			Gm46400			Gm46400
Klhl5			Klhl5			Klhl5			Klhl5			Klhl5			Klhl5			Klhl5			Ccdc82			Klhl5			Klhl5			Klhl5			Klhl5
Lgals8			Lgals8			Lgals8			Lgals8			Lgals8			Lgals8			Lgals8			Gm46400			Lgals8			Lgals8			Lgals8			Lgals8
Meis1			Meis1			Meis1			Meis1			Meis1			Meis1			Meis1			Klhl5			Meis1			Meis1			Meis1			Meis1
Epb41			Epb41			Epb41			Epb41			Epb41			Epb41			Epb41			Lgals8			Epb41			Epb41			Epb41			Epb41
Jph4			Jph4			Jph4			Jph4			Jph4			Jph4			Jph4			Meis1			Jph4			Jph4			Jph4			Jph4
Gm26244			Gm26244			Gm26244			Gm26244			Gm26244			Gm26244			Gm26244			Epb41			Gm26244			Gm26244			Gm26244			Gm26244
Grin2b			Grin2b			Grin2b			Grin2b			Grin2b			Grin2b			Grin2b			Jph4			Grin2b			Grin2b			Grin2b			Grin2b
Gjb1			Gjb1			Gjb1			Gjb1			Gjb1			Gjb1			Gjb1			Gm26244			Gjb1			Gjb1			Gjb1			Gjb1
Gpc6			Gpc6			Gpc6			Gpc6			Gpc6			Gpc6			Gpc6			Grin2b			Gpc6			Gpc6			Gpc6			Gpc6
Nptxr			Nptxr			Nptxr			Nptxr			Nptxr			Nptxr			Nptxr			Gjb1			Nptxr			Nptxr			Nptxr			Nptxr
Ebf2			Ebf2			Ebf2			Ebf2			Ebf2			Ebf2			Ebf2			Gpc6			Ebf2			Ebf2			Ebf2			Ebf2
Lgals3bp			Lgals3bp			Lgals3bp			Lgals3bp			Lgals3bp			Lgals3bp			Lgals3bp			Nptxr			Lgals3bp			Lgals3bp			Lgals3bp			Lgals3bp
Itgb4			Itgb4			Itgb4			Itgb4			Itgb4			Itgb4			Itgb4			Ebf2			Itgb4			Itgb4			Itgb4			Itgb4
Nefh			Nefh			Nefh			Nefh			Nefh			Nefh			Nefh			Lgals3bp			Nefh			Nefh			Nefh			Nefh
Cdr2l			Cdr2l			Cdr2l			Cdr2l			Cdr2l			Cdr2l			Cdr2l			Itgb4			Cdr2l			Cdr2l			Cdr2l			Cdr2l
Nell2			Nell2			Nell2			Nell2			Nell2			Nell2			Nell2			Nefh			Nell2			Nell2			Nell2			Nell2
D930019O06Rik			D930019O06Rik			D930019O06Rik			D930019O06Rik			D930019O06Rik			D930019O06Rik			D930019O06Rik			Cdr2l			D930019O06Rik			D930019O06Rik			D930019O06Rik			D930019O06Rik
Macroh2a2			Macroh2a2			Macroh2a2			Macroh2a2			Macroh2a2			Macroh2a2			Macroh2a2			Nell2			Macroh2a2			Macroh2a2			Macroh2a2			Macroh2a2
D7Ertd443e			D7Ertd443e			D7Ertd443e			D7Ertd443e			D7Ertd443e			D7Ertd443e			D7Ertd443e			D930019O06Rik			D7Ertd443e			D7Ertd443e			D7Ertd443e			D7Ertd443e
Cmya5			Cmya5			Cmya5			Cmya5			Cmya5			Cmya5			Cmya5			Macroh2a2			Cmya5			Cmya5			Cmya5			Cmya5
Tnrc6a			Tnrc6a			Tnrc6a			Tnrc6a			Tnrc6a			Tnrc6a			Tnrc6a			D7Ertd443e			Tnrc6a			Tnrc6a			Tnrc6a			Tnrc6a
Necab2			Necab2			Necab2			Necab2			Necab2			Necab2			Necab2			Cmya5			Necab2			Necab2			Necab2			Necab2
Pcdhgb5			Pcdhgb5			Pcdhgb5			Pcdhgb5			Pcdhgb5			Pcdhgb5			Pcdhgb5			Tnrc6a			Pcdhgb5			Pcdhgb5			Pcdhgb5			Pcdhgb5
Gm15991			Gm15991			Gm15991			Gm15991			Gm15991			Gm15991			Gm15991			Necab2			Gm15991			Gm15991			Gm15991			Gm15991
Myod1			Myod1			Myod1			Myod1			Myod1			Myod1			Myod1			Pcdhgb5			Myod1			Myod1			Myod1			Myod1
A330049N07Rik			A330049N07Rik			A330049N07Rik			A330049N07Rik			A330049N07Rik			A330049N07Rik			A330049N07Rik			Gm15991			A330049N07Rik			A330049N07Rik			A330049N07Rik			A330049N07Rik
Gm48519			Gm48519			Gm48519			Gm48519			Gm48519			Gm48519			Gm48519			Myod1			Gm48519			Gm48519			Gm48519			Gm48519
H2-T22			H2-T22			H2-T22			H2-T22			H2-T22			H2-T22			H2-T22			A330049N07Rik			H2-T22			H2-T22			H2-T22			H2-T22
Emilin2			Emilin2			Emilin2			Emilin2			Emilin2			Emilin2			Emilin2			Gm48519			Emilin2			Emilin2			Emilin2			Emilin2
Acvr2a			Acvr2a			Acvr2a			Acvr2a			Acvr2a			Acvr2a			Acvr2a			H2-T22			Acvr2a			Acvr2a			Acvr2a			Acvr2a
Pdzrn4			Pdzrn4			Pdzrn4			Pdzrn4			Pdzrn4			Pdzrn4			Pdzrn4			Emilin2			Pdzrn4			Pdzrn4			Pdzrn4			Pdzrn4
Tnfaip8l1			Tnfaip8l1			Tnfaip8l1			Tnfaip8l1			Tnfaip8l1			Tnfaip8l1			Tnfaip8l1			Acvr2a			Tnfaip8l1			Tnfaip8l1			Tnfaip8l1			Tnfaip8l1
Cd24a			Cd24a			Cd24a			Cd24a			Cd24a			Cd24a			Cd24a			Pdzrn4			Cd24a			Cd24a			Cd24a			Cd24a
Pxk			Pxk			Pxk			Pxk			Pxk			Pxk			Pxk			Tnfaip8l1			Pxk			Pxk			Pxk			Pxk
Fat3			Fat3			Fat3			Fat3			Fat3			Fat3			Fat3			Cd24a			Fat3			Fat3			Fat3			Fat3
Ackr1			Ackr1			Ackr1			Ackr1			Ackr1			Ackr1			Ackr1			Pxk			Ackr1			Ackr1			Ackr1			Ackr1
Scn4b			Scn4b			Scn4b			Scn4b			Scn4b			Scn4b			Scn4b			Fat3			Scn4b			Scn4b			Scn4b			Scn4b
Pcdhgb6			Pcdhgb6			Pcdhgb6			Pcdhgb6			Pcdhgb6			Pcdhgb6			Pcdhgb6			Ackr1			Pcdhgb6			Pcdhgb6			Pcdhgb6			Pcdhgb6
Top2a			Top2a			Top2a			Top2a			Top2a			Top2a			Top2a			Scn4b			Top2a			Top2a			Top2a			Top2a
Adamts5			Adamts5			Adamts5			Adamts5			Adamts5			Adamts5			Adamts5			Pcdhgb6			Adamts5			Adamts5			Adamts5			Adamts5
Gm16299			Gm16299			Gm16299			Gm16299			Gm16299			Gm16299			Gm16299			Top2a			Gm16299			Gm16299			Gm16299			Gm16299
Rnf213			Rnf213			Rnf213			Rnf213			Rnf213			Rnf213			Rnf213			Adamts5			Rnf213			Rnf213			Rnf213			Rnf213
Anxa4			Anxa4			Anxa4			Anxa4			Anxa4			Anxa4			Anxa4			Gm16299			Anxa4			Anxa4			Anxa4			Anxa4
Six4			Six4			Six4			Six4			Six4			Six4			Six4			Rnf213			Six4			Six4			Six4			Six4
Fzd8			Fzd8			Fzd8			Fzd8			Fzd8			Fzd8			Fzd8			Anxa4			Fzd8			Fzd8			Fzd8			Fzd8
Ramp3			Ramp3			Ramp3			Ramp3			Ramp3			Ramp3			Ramp3			Six4			Ramp3			Ramp3			Ramp3			Ramp3
Slc16a2			Slc16a2			Slc16a2			Slc16a2			Slc16a2			Slc16a2			Slc16a2			Fzd8			Slc16a2			Slc16a2			Slc16a2			Slc16a2
Cdhr3			Cdhr3			Cdhr3			Cdhr3			Cdhr3			Cdhr3			Cdhr3			Ramp3			Cdhr3			Cdhr3			Cdhr3			Cdhr3
9130017K11Rik			9130017K11Rik			9130017K11Rik			9130017K11Rik			9130017K11Rik			9130017K11Rik			9130017K11Rik			Slc16a2			9130017K11Rik			9130017K11Rik			9130017K11Rik			9130017K11Rik
Akain1			Akain1			Akain1			Akain1			Akain1			Akain1			Akain1			Cdhr3			Akain1			Akain1			Akain1			Akain1
Peg3			Peg3			Peg3			Peg3			Peg3			Peg3			Peg3			9130017K11Rik			Peg3			Peg3			Peg3			Peg3
Shroom2			Shroom2			Shroom2			Shroom2			Shroom2			Shroom2			Shroom2			Akain1			Shroom2			Shroom2			Shroom2			Shroom2
Hs3st3a1			Hs3st3a1			Hs3st3a1			Hs3st3a1			Hs3st3a1			Hs3st3a1			Hs3st3a1			Peg3			Hs3st3a1			Hs3st3a1			Hs3st3a1			Hs3st3a1
Riox2			Riox2			Riox2			Riox2			Riox2			Riox2			Riox2			Shroom2			Riox2			Riox2			Riox2			Riox2
Gm16070			Gm16070			Gm16070			Gm16070			Gm16070			Gm16070			Gm16070			Hs3st3a1			Gm16070			Gm16070			Gm16070			Gm16070
Olfm2			Olfm2			Olfm2			Olfm2			Olfm2			Olfm2			Olfm2			Riox2			Olfm2			Olfm2			Olfm2			Olfm2
Lrp4			Lrp4			Lrp4			Lrp4			Lrp4			Lrp4			Lrp4			Gm16070			Lrp4			Lrp4			Lrp4			Lrp4
Hkdc1			Hkdc1			Hkdc1			Hkdc1			Hkdc1			Hkdc1			Hkdc1			Olfm2			Hkdc1			Hkdc1			Hkdc1			Hkdc1
Alcam			Alcam			Alcam			Alcam			Alcam			Alcam			Alcam			Lrp4			Alcam			Alcam			Alcam			Alcam
Megf10			Megf10			Megf10			Megf10			Megf10			Megf10			Megf10			Hkdc1			Megf10			Megf10			Megf10			Megf10
C130026L21Rik			C130026L21Rik			C130026L21Rik			C130026L21Rik			C130026L21Rik			C130026L21Rik			C130026L21Rik			Alcam			C130026L21Rik			C130026L21Rik			C130026L21Rik			C130026L21Rik
Kcnj12			Kcnj12			Kcnj12			Kcnj12			Kcnj12			Kcnj12			Kcnj12			Megf10			Kcnj12			Kcnj12			Kcnj12			Kcnj12
Postn			Postn			Postn			Postn			Postn			Postn			Postn			C130026L21Rik			Postn			Postn			Postn			Postn
Smyd1			Smyd1			Smyd1			Smyd1			Smyd1			Smyd1			Smyd1			Kcnj12			Smyd1			Smyd1			Smyd1			Smyd1
Gm45426			Gm45426			Gm45426			Gm45426			Gm45426			Gm45426			Gm45426			Postn			Gm45426			Gm45426			Gm45426			Gm45426
Rcn1			Rcn1			Rcn1			Rcn1			Rcn1			Rcn1			Rcn1			Smyd1			Rcn1			Rcn1			Rcn1			Rcn1
Unc13c			Unc13c			Unc13c			Unc13c			Unc13c			Unc13c			Unc13c			Gm45426			Unc13c			Unc13c			Unc13c			Unc13c
Vgll3			Vgll3			Vgll3			Vgll3			Vgll3			Vgll3			Vgll3			Rcn1			Vgll3			Vgll3			Vgll3			Vgll3
Marchf4			Marchf4			Marchf4			Marchf4			Marchf4			Marchf4			Marchf4			Unc13c			Marchf4			Marchf4			Marchf4			Marchf4
Ccdc9b			Ccdc9b			Ccdc9b			Ccdc9b			Ccdc9b			Ccdc9b			Ccdc9b			Vgll3			Ccdc9b			Ccdc9b			Ccdc9b			Ccdc9b
Fzd10os			Fzd10os			Fzd10os			Fzd10os			Fzd10os			Fzd10os			Fzd10os			Marchf4			Fzd10os			Fzd10os			Fzd10os			Fzd10os
C030017B01Rik			C030017B01Rik			C030017B01Rik			C030017B01Rik			C030017B01Rik			C030017B01Rik			C030017B01Rik			Ccdc9b			C030017B01Rik			C030017B01Rik			C030017B01Rik			C030017B01Rik
BC035947			BC035947			BC035947			BC035947			BC035947			BC035947			BC035947			Fzd10os			BC035947			BC035947			BC035947			BC035947
Mboat1			Mboat1			Mboat1			Mboat1			Mboat1			Mboat1			Mboat1			C030017B01Rik			Mboat1			Mboat1			Mboat1			Mboat1
Pcdhb10			Pcdhb10			Pcdhb10			Pcdhb10			Pcdhb10			Pcdhb10			Pcdhb10			BC035947			Pcdhb10			Pcdhb10			Pcdhb10			Pcdhb10
Ccdc3			Ccdc3			Ccdc3			Ccdc3			Ccdc3			Ccdc3			Ccdc3			Mboat1			Ccdc3			Ccdc3			Ccdc3			Ccdc3
Zfp947			Zfp947			Zfp947			Zfp947			Zfp947			Zfp947			Zfp947			Pcdhb10			Zfp947			Zfp947			Zfp947			Zfp947
Pcolce2			Pcolce2			Pcolce2			Pcolce2			Pcolce2			Pcolce2			Pcolce2			Ccdc3			Pcolce2			Pcolce2			Pcolce2			Pcolce2
Appl2			Appl2			Appl2			Appl2			Appl2			Appl2			Appl2			Zfp947			Appl2			Appl2			Appl2			Appl2
Tbkbp1			Tbkbp1			Tbkbp1			Tbkbp1			Tbkbp1			Tbkbp1			Tbkbp1			Pcolce2			Tbkbp1			Tbkbp1			Tbkbp1			Tbkbp1
Dlg2			Dlg2			Dlg2			Dlg2			Dlg2			Dlg2			Dlg2			Appl2			Dlg2			Dlg2			Dlg2			Dlg2
Col4a3			Col4a3			Col4a3			Col4a3			Col4a3			Col4a3			Col4a3			Tbkbp1			Col4a3			Col4a3			Col4a3			Col4a3
Vldlr			Vldlr			Vldlr			Vldlr			Vldlr			Vldlr			Vldlr			Dlg2			Vldlr			Vldlr			Vldlr			Vldlr
Pls1			Pls1			Pls1			Pls1			Pls1			Pls1			Pls1			Col4a3			Pls1			Pls1			Pls1			Pls1
Echdc2			Echdc2			Echdc2			Echdc2			Echdc2			Echdc2			Echdc2			Vldlr			Echdc2			Echdc2			Echdc2			Echdc2
Stat4			Stat4			Stat4			Stat4			Stat4			Stat4			Stat4			Pls1			Stat4			Stat4			Stat4			Stat4
Plppr5			Plppr5			Plppr5			Plppr5			Plppr5			Plppr5			Plppr5			Echdc2			Plppr5			Plppr5			Plppr5			Plppr5
Lrrtm1			Lrrtm1			Lrrtm1			Lrrtm1			Lrrtm1			Lrrtm1			Lrrtm1			Stat4			Lrrtm1			Lrrtm1			Lrrtm1			Lrrtm1
Kif19a			Kif19a			Kif19a			Kif19a			Kif19a			Kif19a			Kif19a			Plppr5			Kif19a			Kif19a			Kif19a			Kif19a
Mr1			Mr1			Mr1			Mr1			Mr1			Mr1			Mr1			Lrrtm1			Mr1			Mr1			Mr1			Mr1
Pcdhgb7			Pcdhgb7			Pcdhgb7			Pcdhgb7			Pcdhgb7			Pcdhgb7			Pcdhgb7			Kif19a			Pcdhgb7			Pcdhgb7			Pcdhgb7			Pcdhgb7
Dok6			Dok6			Dok6			Dok6			Dok6			Dok6			Dok6			Mr1			Dok6			Dok6			Dok6			Dok6
Glp2r			Glp2r			Glp2r			Glp2r			Glp2r			Glp2r			Glp2r			Pcdhgb7			Glp2r			Glp2r			Glp2r			Glp2r
Scn1b			Scn1b			Scn1b			Scn1b			Scn1b			Scn1b			Scn1b			Dok6			Scn1b			Scn1b			Scn1b			Scn1b
Gm12576			Gm12576			Gm12576			Gm12576			Gm12576			Gm12576			Gm12576			Glp2r			Gm12576			Gm12576			Gm12576			Gm12576
Cacng4			Cacng4			Cacng4			Cacng4			Cacng4			Cacng4			Cacng4			Scn1b			Cacng4			Cacng4			Cacng4			Cacng4
Tll1			Tll1			Tll1			Tll1			Tll1			Tll1			Tll1			Gm12576			Tll1			Tll1			Tll1			Tll1
Nkx6-2			Nkx6-2			Nkx6-2			Nkx6-2			Nkx6-2			Nkx6-2			Nkx6-2			Cacng4			Nkx6-2			Nkx6-2			Nkx6-2			Nkx6-2
Cacng3			Cacng3			Cacng3			Cacng3			Cacng3			Cacng3			Cacng3			Tll1			Cacng3			Cacng3			Cacng3			Cacng3
Asb2			Asb2			Asb2			Asb2			Asb2			Asb2			Asb2			Nkx6-2			Asb2			Asb2			Asb2			Asb2
Gm5546			Gm5546			Gm5546			Gm5546			Gm5546			Gm5546			Gm5546			Cacng3			Gm5546			Gm5546			Gm5546			Gm5546
Gm19500			Gm19500			Gm19500			Gm19500			Gm19500			Gm19500			Gm19500			Asb2			Gm19500			Gm19500			Gm19500			Gm19500
Myh2			Myh2			Myh2			Myh2			Myh2			Myh2			Myh2			Gm5546			Myh2			Myh2			Myh2			Myh2
Car8			Car8			Car8			Car8			Car8			Car8			Car8			Gm19500			Car8			Car8			Car8			Car8
Pde8a			Pde8a			Pde8a			Pde8a			Pde8a			Pde8a			Pde8a			Myh2			Pde8a			Pde8a			Pde8a			Pde8a
Sun2			Sun2			Sun2			Sun2			Sun2			Sun2			Sun2			Car8			Sun2			Sun2			Sun2			Sun2
Cntn2			Cntn2			Cntn2			Cntn2			Cntn2			Cntn2			Cntn2			Pde8a			Cntn2			Cntn2			Cntn2			Cntn2
Slc8a3			Slc8a3			Slc8a3			Slc8a3			Slc8a3			Slc8a3			Slc8a3			Sun2			Slc8a3			Slc8a3			Slc8a3			Slc8a3
Lsm11			Lsm11			Lsm11			Lsm11			Lsm11			Lsm11			Lsm11			Cntn2			Lsm11			Lsm11			Lsm11			Lsm11
Scn3b			Scn3b			Scn3b			Scn3b			Scn3b			Scn3b			Scn3b			Slc8a3			Scn3b			Scn3b			Scn3b			Scn3b
St8sia2			St8sia2			St8sia2			St8sia2			St8sia2			St8sia2			St8sia2			Lsm11			St8sia2			St8sia2			St8sia2			St8sia2
Rxra			Rxra			Rxra			Rxra			Rxra			Rxra			Rxra			Scn3b			Rxra			Rxra			Rxra			Rxra
Gm9954			Gm9954			Gm9954			Gm9954			Gm9954			Gm9954			Gm9954			St8sia2			Gm9954			Gm9954			Gm9954			Gm9954
Sparc			Sparc			Sparc			Sparc			Sparc			Sparc			Sparc			Rxra			Sparc			Sparc			Sparc			Sparc
Neat1			Neat1			Neat1			Neat1			Neat1			Neat1			Neat1			Gm9954			Neat1			Neat1			Neat1			Neat1
Gm35161			Gm35161			Gm35161			Gm35161			Gm35161			Gm35161			Gm35161			Sparc			Gm35161			Gm35161			Gm35161			Gm35161
Slc30a10			Slc30a10			Slc30a10			Slc30a10			Slc30a10			Slc30a10			Slc30a10			Neat1			Slc30a10			Slc30a10			Slc30a10			Slc30a10
Sytl1			Sytl1			Sytl1			Sytl1			Sytl1			Sytl1			Sytl1			Gm35161			Sytl1			Sytl1			Sytl1			Sytl1
Pcp4l1			Pcp4l1			Pcp4l1			Pcp4l1			Pcp4l1			Pcp4l1			Pcp4l1			Slc30a10			Pcp4l1			Pcp4l1			Pcp4l1			Pcp4l1
Ddn			Ddn			Ddn			Ddn			Ddn			Ddn			Ddn			Sytl1			Ddn			Ddn			Ddn			Ddn
Dach1			Dach1			Dach1			Dach1			Dach1			Dach1			Dach1			Pcp4l1			Dach1			Dach1			Dach1			Dach1
Gm49593			Gm49593			Gm49593			Gm49593			Gm49593			Gm49593			Gm49593			Ddn			Gm49593			Gm49593			Gm49593			Gm49593
Myo5c			Myo5c			Myo5c			Myo5c			Myo5c			Myo5c			Myo5c			Dach1			Myo5c			Myo5c			Myo5c			Myo5c
Plaat3			Plaat3			Plaat3			Plaat3			Plaat3			Plaat3			Plaat3			Gm49593			Plaat3			Plaat3			Plaat3			Plaat3
Gm18783			Gm18783			Gm18783			Gm18783			Gm18783			Gm18783			Gm18783			Myo5c			Gm18783			Gm18783			Gm18783			Gm18783
Htr1d			Htr1d			Htr1d			Htr1d			Htr1d			Htr1d			Htr1d			Plaat3			Htr1d			Htr1d			Htr1d			Htr1d
Fstl5			Fstl5			Fstl5			Fstl5			Fstl5			Fstl5			Fstl5			Gm18783			Fstl5			Fstl5			Fstl5			Fstl5
Plekha4			Plekha4			Plekha4			Plekha4			Plekha4			Plekha4			Plekha4			Htr1d			Plekha4			Plekha4			Plekha4			Plekha4
Rasgrf1			Rasgrf1			Rasgrf1			Rasgrf1			Rasgrf1			Rasgrf1			Rasgrf1			Fstl5			Rasgrf1			Rasgrf1			Rasgrf1			Rasgrf1
Stum			Stum			Stum			Stum			Stum			Stum			Stum			Plekha4			Stum			Stum			Stum			Stum
Slc27a2			Slc27a2			Slc27a2			Slc27a2			Slc27a2			Slc27a2			Slc27a2			Rasgrf1			Slc27a2			Slc27a2			Slc27a2			Slc27a2
S1pr5			S1pr5			S1pr5			S1pr5			S1pr5			S1pr5			S1pr5			Stum			S1pr5			S1pr5			S1pr5			S1pr5
Arhgef10			Arhgef10			Arhgef10			Arhgef10			Arhgef10			Arhgef10			Arhgef10			Slc27a2			Arhgef10			Arhgef10			Arhgef10			Arhgef10
Grm5			Grm5			Grm5			Grm5			Grm5			Grm5			Grm5			S1pr5			Grm5			Grm5			Grm5			Grm5
Ppp2r2c			Ppp2r2c			Ppp2r2c			Ppp2r2c			Ppp2r2c			Ppp2r2c			Ppp2r2c			Arhgef10			Ppp2r2c			Ppp2r2c			Ppp2r2c			Ppp2r2c
Psg16			Psg16			Psg16			Psg16			Psg16			Psg16			Psg16			Grm5			Psg16			Psg16			Psg16			Psg16
Aldh3b2			Aldh3b2			Aldh3b2			Aldh3b2			Aldh3b2			Aldh3b2			Aldh3b2			Ppp2r2c			Aldh3b2			Aldh3b2			Aldh3b2			Aldh3b2
Atp2b4			Atp2b4			Atp2b4			Atp2b4			Atp2b4			Atp2b4			Atp2b4			Psg16			Atp2b4			Atp2b4			Atp2b4			Atp2b4
Shisa9			Shisa9			Shisa9			Shisa9			Shisa9			Shisa9			Shisa9			Aldh3b2			Shisa9			Shisa9			Shisa9			Shisa9
Pdgfc			Pdgfc			Pdgfc			Pdgfc			Pdgfc			Pdgfc			Pdgfc			Atp2b4			Pdgfc			Pdgfc			Pdgfc			Pdgfc
Pcdhga10			Pcdhga10			Pcdhga10			Pcdhga10			Pcdhga10			Pcdhga10			Pcdhga10			Shisa9			Pcdhga10			Pcdhga10			Pcdhga10			Pcdhga10
Tmbim1			Tmbim1			Tmbim1			Tmbim1			Tmbim1			Tmbim1			Tmbim1			Pdgfc			Tmbim1			Tmbim1			Tmbim1			Tmbim1
Gm7745			Gm7745			Gm7745			Gm7745			Gm7745			Gm7745			Gm7745			Pcdhga10			Gm7745			Gm7745			Gm7745			Gm7745
Oas1b			Oas1b			Oas1b			Oas1b			Oas1b			Oas1b			Oas1b			Tmbim1			Oas1b			Oas1b			Oas1b			Oas1b
Pcdhgb4			Pcdhgb4			Pcdhgb4			Pcdhgb4			Pcdhgb4			Pcdhgb4			Pcdhgb4			Gm7745			Pcdhgb4			Pcdhgb4			Pcdhgb4			Pcdhgb4
Asah2			Asah2			Asah2			Asah2			Asah2			Asah2			Asah2			Oas1b			Asah2			Asah2			Asah2			Asah2
Sptbn2			Sptbn2			Sptbn2			Sptbn2			Sptbn2			Sptbn2			Sptbn2			Pcdhgb4			Sptbn2			Sptbn2			Sptbn2			Sptbn2
Syde1			Syde1			Syde1			Syde1			Syde1			Syde1			Syde1			Asah2			Syde1			Syde1			Syde1			Syde1
Lrfn5			Lrfn5			Lrfn5			Lrfn5			Lrfn5			Lrfn5			Lrfn5			Sptbn2			Lrfn5			Lrfn5			Lrfn5			Lrfn5
Rffl			Rffl			Rffl			Rffl			Rffl			Rffl			Rffl			Syde1			Rffl			Rffl			Rffl			Rffl
Tamalin			Tamalin			Tamalin			Tamalin			Tamalin			Tamalin			Tamalin			Lrfn5			Tamalin			Tamalin			Tamalin			Tamalin
Kcnab3			Kcnab3			Kcnab3			Kcnab3			Kcnab3			Kcnab3			Kcnab3			Rffl			Kcnab3			Kcnab3			Kcnab3			Kcnab3
Plxdc2			Plxdc2			Plxdc2			Plxdc2			Plxdc2			Plxdc2			Plxdc2			Tamalin			Plxdc2			Plxdc2			Plxdc2			Plxdc2
Dock5			Dock5			Dock5			Dock5			Dock5			Dock5			Dock5			Kcnab3			Dock5			Dock5			Dock5			Dock5
Gm47461			Gm47461			Gm47461			Gm47461			Gm47461			Gm47461			Gm47461			Plxdc2			Gm47461			Gm47461			Gm47461			Gm47461
Rasal1			Rasal1			Rasal1			Rasal1			Rasal1			Rasal1			Rasal1			Dock5			Rasal1			Rasal1			Rasal1			Rasal1
5033421B08Rik			5033421B08Rik			5033421B08Rik			5033421B08Rik			5033421B08Rik			5033421B08Rik			5033421B08Rik			Gm47461			5033421B08Rik			5033421B08Rik			5033421B08Rik			5033421B08Rik
Cdk5r2			Cdk5r2			Cdk5r2			Cdk5r2			Cdk5r2			Cdk5r2			Cdk5r2			Rasal1			Cdk5r2			Cdk5r2			Cdk5r2			Cdk5r2
Tex9			Tex9			Tex9			Tex9			Tex9			Tex9			Tex9			5033421B08Rik			Tex9			Tex9			Tex9			Tex9
Cd44			Cd44			Cd44			Cd44			Cd44			Cd44			Cd44			Cdk5r2			Cd44			Cd44			Cd44			Cd44
Rasl10a			Rasl10a			Rasl10a			Rasl10a			Rasl10a			Rasl10a			Rasl10a			Tex9			Rasl10a			Rasl10a			Rasl10a			Rasl10a
Catspere2			Catspere2			Catspere2			Catspere2			Catspere2			Catspere2			Catspere2			Cd44			Catspere2			Catspere2			Catspere2			Catspere2
Cdo1			Cdo1			Cdo1			Cdo1			Cdo1			Cdo1			Cdo1			Rasl10a			Cdo1			Cdo1			Cdo1			Cdo1
Oxtr			Oxtr			Oxtr			Oxtr			Oxtr			Oxtr			Oxtr			Catspere2			Oxtr			Oxtr			Oxtr			Oxtr
Serpinf1			Serpinf1			Serpinf1			Serpinf1			Serpinf1			Serpinf1			Serpinf1			Cdo1			Serpinf1			Serpinf1			Serpinf1			Serpinf1
Col1a1			Col1a1			Col1a1			Col1a1			Col1a1			Col1a1			Col1a1			Oxtr			Col1a1			Col1a1			Col1a1			Col1a1
Fam107b			Fam107b			Fam107b			Fam107b			Fam107b			Fam107b			Fam107b			Serpinf1			Fam107b			Fam107b			Fam107b			Fam107b
Kcnab2			Kcnab2			Kcnab2			Kcnab2			Kcnab2			Kcnab2			Kcnab2			Col1a1			Kcnab2			Kcnab2			Kcnab2			Kcnab2
Gpr26			Gpr26			Gpr26			Gpr26			Gpr26			Gpr26			Gpr26			Fam107b			Gpr26			Gpr26			Gpr26			Gpr26
Hsf4			Hsf4			Hsf4			Hsf4			Hsf4			Hsf4			Hsf4			Kcnab2			Hsf4			Hsf4			Hsf4			Hsf4
Dab2			Dab2			Dab2			Dab2			Dab2			Dab2			Dab2			Gpr26			Dab2			Dab2			Dab2			Dab2
Fads6			Fads6			Fads6			Fads6			Fads6			Fads6			Fads6			Hsf4			Fads6			Fads6			Fads6			Fads6
Gpr27			Gpr27			Gpr27			Gpr27			Gpr27			Gpr27			Gpr27			Dab2			Gpr27			Gpr27			Gpr27			Gpr27
C1galt1			C1galt1			C1galt1			C1galt1			C1galt1			C1galt1			C1galt1			Fads6			C1galt1			C1galt1			C1galt1			C1galt1
Scn9a			Scn9a			Scn9a			Scn9a			Scn9a			Scn9a			Scn9a			Gpr27			Scn9a			Scn9a			Scn9a			Scn9a
Cfap206			Cfap206			Cfap206			Cfap206			Cfap206			Cfap206			Cfap206			C1galt1			Cfap206			Cfap206			Cfap206			Cfap206
Pcdhgb8			Pcdhgb8			Pcdhgb8			Pcdhgb8			Pcdhgb8			Pcdhgb8			Pcdhgb8			Scn9a			Pcdhgb8			Pcdhgb8			Pcdhgb8			Pcdhgb8
Tbx22			Tbx22			Tbx22			Tbx22			Tbx22			Tbx22			Tbx22			Cfap206			Tbx22			Tbx22			Tbx22			Tbx22
mt-Tp			mt-Tp			mt-Tp			mt-Tp			mt-Tp			mt-Tp			mt-Tp			Pcdhgb8			mt-Tp			mt-Tp			mt-Tp			mt-Tp
Gm44644			Gm44644			Gm44644			Gm44644			Gm44644			Gm44644			Gm44644			Tbx22			Gm44644			Gm44644			Gm44644			Gm44644
Aqp4			Aqp4			Aqp4			Aqp4			Aqp4			Aqp4			Aqp4			mt-Tp			Aqp4			Aqp4			Aqp4			Aqp4
Camkk2			Camkk2			Camkk2			Camkk2			Camkk2			Camkk2			Camkk2			Gm44644			Camkk2			Camkk2			Camkk2			Camkk2
Adamts3			Adamts3			Adamts3			Adamts3			Adamts3			Adamts3			Adamts3			Aqp4			Adamts3			Adamts3			Adamts3			Adamts3
Tmem178b			Tmem178b			Tmem178b			Tmem178b			Tmem178b			Tmem178b			Tmem178b			Camkk2			Tmem178b			Tmem178b			Tmem178b			Tmem178b
Proca1			Proca1			Proca1			Proca1			Proca1			Proca1			Proca1			Adamts3			Proca1			Proca1			Proca1			Proca1
Zfp831			Zfp831			Zfp831			Zfp831			Zfp831			Zfp831			Zfp831			Tmem178b			Zfp831			Zfp831			Zfp831			Zfp831
Kcnmb4			Kcnmb4			Kcnmb4			Kcnmb4			Kcnmb4			Kcnmb4			Kcnmb4			Proca1			Kcnmb4			Kcnmb4			Kcnmb4			Kcnmb4
Igfbp2			Igfbp2			Igfbp2			Igfbp2			Igfbp2			Igfbp2			Igfbp2			Zfp831			Igfbp2			Igfbp2			Igfbp2			Igfbp2
Pde3a			Pde3a			Pde3a			Pde3a			Pde3a			Pde3a			Pde3a			Kcnmb4			Pde3a			Pde3a			Pde3a			Pde3a
Pcdh11x			Pcdh11x			Pcdh11x			Pcdh11x			Pcdh11x			Pcdh11x			Pcdh11x			Igfbp2			Pcdh11x			Pcdh11x			Pcdh11x			Pcdh11x
Nek10			Nek10			Nek10			Nek10			Nek10			Nek10			Nek10			Pde3a			Nek10			Nek10			Nek10			Nek10
Hapln1			Hapln1			Hapln1			Hapln1			Hapln1			Hapln1			Hapln1			Pcdh11x			Hapln1			Hapln1			Hapln1			Hapln1
B3gat1			B3gat1			B3gat1			B3gat1			B3gat1			B3gat1			B3gat1			Nek10			B3gat1			B3gat1			B3gat1			B3gat1
Socs2			Socs2			Socs2			Socs2			Socs2			Socs2			Socs2			Hapln1			Socs2			Socs2			Socs2			Socs2
Nrsn2			Nrsn2			Nrsn2			Nrsn2			Nrsn2			Nrsn2			Nrsn2			B3gat1			Nrsn2			Nrsn2			Nrsn2			Nrsn2
Col1a2			Col1a2			Col1a2			Col1a2			Col1a2			Col1a2			Col1a2			Socs2			Col1a2			Col1a2			Col1a2			Col1a2
Stxbp2			Stxbp2			Stxbp2			Stxbp2			Stxbp2			Stxbp2			Stxbp2			Nrsn2			Stxbp2			Stxbp2			Stxbp2			Stxbp2
Ankrd63			Ankrd63			Ankrd63			Ankrd63			Ankrd63			Ankrd63			Ankrd63			Col1a2			Ankrd63			Ankrd63			Ankrd63			Ankrd63
Kif11			Kif11			Kif11			Kif11			Kif11			Kif11			Kif11			Stxbp2			Kif11			Kif11			Kif11			Kif11
Tsnax			Tsnax			Tsnax			Tsnax			Tsnax			Tsnax			Tsnax			Ankrd63			Tsnax			Tsnax			Tsnax			Tsnax
Ifit3			Ifit3			Ifit3			Ifit3			Ifit3			Ifit3			Ifit3			Kif11			Ifit3			Ifit3			Ifit3			Ifit3
Gm14824			Gm14824			Gm14824			Gm14824			Gm14824			Gm14824			Gm14824			Tsnax			Gm14824			Gm14824			Gm14824			Gm14824
Gm49375			Gm49375			Gm49375			Gm49375			Gm49375			Gm49375			Gm49375			Ifit3			Gm49375			Gm49375			Gm49375			Gm49375
Gnaz			Gnaz			Gnaz			Gnaz			Gnaz			Gnaz			Gnaz			Gm14824			Gnaz			Gnaz			Gnaz			Gnaz
Atp11a			Atp11a			Atp11a			Atp11a			Atp11a			Atp11a			Atp11a			Gm49375			Atp11a			Atp11a			Atp11a			Atp11a
Exoc6			Exoc6			Exoc6			Exoc6			Exoc6			Exoc6			Exoc6			Gnaz			Exoc6			Exoc6			Exoc6			Exoc6
Gm26703			Gm26703			Gm26703			Gm26703			Gm26703			Gm26703			Gm26703			Atp11a			Gm26703			Gm26703			Gm26703			Gm26703
Lsp1			Lsp1			Lsp1			Lsp1			Lsp1			Lsp1			Lsp1			Exoc6			Lsp1			Lsp1			Lsp1			Lsp1
1700063D05Rik			1700063D05Rik			1700063D05Rik			1700063D05Rik			1700063D05Rik			1700063D05Rik			1700063D05Rik			Gm26703			1700063D05Rik			1700063D05Rik			1700063D05Rik			1700063D05Rik
Cx3cr1			Cx3cr1			Cx3cr1			Cx3cr1			Cx3cr1			Cx3cr1			Cx3cr1			Lsp1			Cx3cr1			Cx3cr1			Cx3cr1			Cx3cr1
Klf16			Klf16			Klf16			Klf16			Klf16			Klf16			Klf16			1700063D05Rik			Klf16			Klf16			Klf16			Klf16
Cd22			Cd22			Cd22			Cd22			Cd22			Cd22			Cd22			Cx3cr1			Cd22			Cd22			Cd22			Cd22
Zdhhc2			Zdhhc2			Zdhhc2			Zdhhc2			Zdhhc2			Zdhhc2			Zdhhc2			Klf16			Zdhhc2			Zdhhc2			Zdhhc2			Zdhhc2
Kazald1			Kazald1			Kazald1			Kazald1			Kazald1			Kazald1			Kazald1			Cd22			Kazald1			Kazald1			Kazald1			Kazald1
Fhl5			Fhl5			Fhl5			Fhl5			Fhl5			Fhl5			Fhl5			Zdhhc2			Fhl5			Fhl5			Fhl5			Fhl5
Smyd3			Smyd3			Smyd3			Smyd3			Smyd3			Smyd3			Smyd3			Kazald1			Smyd3			Smyd3			Smyd3			Smyd3
Exd2			Exd2			Exd2			Exd2			Exd2			Exd2			Exd2			Fhl5			Exd2			Exd2			Exd2			Exd2
Evpl			Evpl			Evpl			Evpl			Evpl			Evpl			Evpl			Smyd3			Evpl			Evpl			Evpl			Evpl
Tmem198			Tmem198			Tmem198			Tmem198			Tmem198			Tmem198			Tmem198			Exd2			Tmem198			Tmem198			Tmem198			Tmem198
Rreb1			Rreb1			Rreb1			Rreb1			Rreb1			Rreb1			Rreb1			Evpl			Rreb1			Rreb1			Rreb1			Rreb1
Gm46620			Gm46620			Gm46620			Gm46620			Gm46620			Gm46620			Gm46620			Tmem198			Gm46620			Gm46620			Gm46620			Gm46620
Fmn1			Fmn1			Fmn1			Fmn1			Fmn1			Fmn1			Fmn1			Rreb1			Fmn1			Fmn1			Fmn1			Fmn1
Meis2			Meis2			Meis2			Meis2			Meis2			Meis2			Meis2			Gm46620			Meis2			Meis2			Meis2			Meis2
Kirrel2			Kirrel2			Kirrel2			Kirrel2			Kirrel2			Kirrel2			Kirrel2			Fmn1			Kirrel2			Kirrel2			Kirrel2			Kirrel2
Dcc			Dcc			Dcc			Dcc			Dcc			Dcc			Dcc			Meis2			Dcc			Dcc			Dcc			Dcc
Glra3			Glra3			Glra3			Glra3			Glra3			Glra3			Glra3			Kirrel2			Glra3			Glra3			Glra3			Glra3
Ctsz			Ctsz			Ctsz			Ctsz			Ctsz			Ctsz			Ctsz			Dcc			Ctsz			Ctsz			Ctsz			Ctsz
Gm49949			Gm49949			Gm49949			Gm49949			Gm49949			Gm49949			Gm49949			Glra3			Gm49949			Gm49949			Gm49949			Gm49949
Scml4			Scml4			Scml4			Scml4			Scml4			Scml4			Scml4			Ctsz			Scml4			Scml4			Scml4			Scml4
Sorbs3			Sorbs3			Sorbs3			Sorbs3			Sorbs3			Sorbs3			Sorbs3			Gm49949			Sorbs3			Sorbs3			Sorbs3			Sorbs3
Batf3			Batf3			Batf3			Batf3			Batf3			Batf3			Batf3			Scml4			Batf3			Batf3			Batf3			Batf3
Mybpc1			Mybpc1			Mybpc1			Mybpc1			Mybpc1			Mybpc1			Mybpc1			Sorbs3			Mybpc1			Mybpc1			Mybpc1			Mybpc1
Cd36			Cd36			Cd36			Cd36			Cd36			Cd36			Cd36			Batf3			Cd36			Cd36			Cd36			Cd36
Prox1			Prox1			Prox1			Prox1			Prox1			Prox1			Prox1			Mybpc1			Prox1			Prox1			Prox1			Prox1
Negr1			Negr1			Negr1			Negr1			Negr1			Negr1			Negr1			Cd36			Negr1			Negr1			Negr1			Negr1
Cerk			Cerk			Cerk			Cerk			Cerk			Cerk			Cerk			Prox1			Cerk			Cerk			Cerk			Cerk
Igsf3			Igsf3			Igsf3			Igsf3			Igsf3			Igsf3			Igsf3			Negr1			Igsf3			Igsf3			Igsf3			Igsf3
Dact1			Dact1			Dact1			Dact1			Dact1			Dact1			Dact1			Cerk			Dact1			Dact1			Dact1			Dact1
Prrg1			Prrg1			Prrg1			Prrg1			Prrg1			Prrg1			Prrg1			Igsf3			Prrg1			Prrg1			Prrg1			Prrg1
Lpin1			Lpin1			Lpin1			Lpin1			Lpin1			Lpin1			Lpin1			Dact1			Lpin1			Lpin1			Lpin1			Lpin1
CK137956			CK137956			CK137956			CK137956			CK137956			CK137956			CK137956			Prrg1			CK137956			CK137956			CK137956			CK137956
Gm15663			Gm15663			Gm15663			Gm15663			Gm15663			Gm15663			Gm15663			Lpin1			Gm15663			Gm15663			Gm15663			Gm15663
Dmp1			Dmp1			Dmp1			Dmp1			Dmp1			Dmp1			Dmp1			CK137956			Dmp1			Dmp1			Dmp1			Dmp1
Gm38642			Gm38642			Gm38642			Gm38642			Gm38642			Gm38642			Gm38642			Gm15663			Gm38642			Gm38642			Gm38642			Gm38642
Ehbp1l1			Ehbp1l1			Ehbp1l1			Ehbp1l1			Ehbp1l1			Ehbp1l1			Ehbp1l1			Dmp1			Ehbp1l1			Ehbp1l1			Ehbp1l1			Ehbp1l1
Gm43242			Gm43242			Gm43242			Gm43242			Gm43242			Gm43242			Gm43242			Gm38642			Gm43242			Gm43242			Gm43242			Gm43242
2810407A14Rik			2810407A14Rik			2810407A14Rik			2810407A14Rik			2810407A14Rik			2810407A14Rik			2810407A14Rik			Ehbp1l1			2810407A14Rik			2810407A14Rik			2810407A14Rik			2810407A14Rik
Plppr2			Plppr2			Plppr2			Plppr2			Plppr2			Plppr2			Plppr2			Gm43242			Plppr2			Plppr2			Plppr2			Plppr2
1700016K19Rik			1700016K19Rik			1700016K19Rik			1700016K19Rik			1700016K19Rik			1700016K19Rik			1700016K19Rik			2810407A14Rik			1700016K19Rik			1700016K19Rik			1700016K19Rik			1700016K19Rik
Hpcal1			Hpcal1			Hpcal1			Hpcal1			Hpcal1			Hpcal1			Hpcal1			Plppr2			Hpcal1			Hpcal1			Hpcal1			Hpcal1
Hpgd			Hpgd			Hpgd			Hpgd			Hpgd			Hpgd			Hpgd			1700016K19Rik			Hpgd			Hpgd			Hpgd			Hpgd
Dleu7			Dleu7			Dleu7			Dleu7			Dleu7			Dleu7			Dleu7			Hpcal1			Dleu7			Dleu7			Dleu7			Dleu7
Ccnd1			Ccnd1			Ccnd1			Ccnd1			Ccnd1			Ccnd1			Ccnd1			Hpgd			Ccnd1			Ccnd1			Ccnd1			Ccnd1
Slco1b2			Slco1b2			Slco1b2			Slco1b2			Slco1b2			Slco1b2			Slco1b2			Dleu7			Slco1b2			Slco1b2			Slco1b2			Slco1b2
Pgm2l1			Pgm2l1			Pgm2l1			Pgm2l1			Pgm2l1			Pgm2l1			Pgm2l1			Ccnd1			Pgm2l1			Pgm2l1			Pgm2l1			Pgm2l1
Gm42864			Gm42864			Gm42864			Gm42864			Gm42864			Gm42864			Gm42864			Slco1b2			Gm42864			Gm42864			Gm42864			Gm42864
9330117O12Rik			9330117O12Rik			9330117O12Rik			9330117O12Rik			9330117O12Rik			9330117O12Rik			9330117O12Rik			Pgm2l1			9330117O12Rik			9330117O12Rik			9330117O12Rik			9330117O12Rik
Gm30085			Gm30085			Gm30085			Gm30085			Gm30085			Gm30085			Gm30085			Gm42864			Gm30085			Gm30085			Gm30085			Gm30085
Gm18786			Gm18786			Gm18786			Gm18786			Gm18786			Gm18786			Gm18786			9330117O12Rik			Gm18786			Gm18786			Gm18786			Gm18786
Sox2ot			Sox2ot			Sox2ot			Sox2ot			Sox2ot			Sox2ot			Sox2ot			Gm30085			Sox2ot			Sox2ot			Sox2ot			Sox2ot
Cd38			Cd38			Cd38			Cd38			Cd38			Cd38			Cd38			Gm18786			Cd38			Cd38			Cd38			Cd38
Tshz2			Tshz2			Tshz2			Tshz2			Tshz2			Tshz2			Tshz2			Sox2ot			Tshz2			Tshz2			Tshz2			Tshz2
Slc25a13			Slc25a13			Slc25a13			Slc25a13			Slc25a13			Slc25a13			Slc25a13			Cd38			Slc25a13			Slc25a13			Slc25a13			Slc25a13
Mme			Mme			Mme			Mme			Mme			Mme			Mme			Tshz2			Mme			Mme			Mme			Mme
H1f3			H1f3			H1f3			H1f3			H1f3			H1f3			H1f3			Slc25a13			H1f3			H1f3			H1f3			H1f3
Atxn7l3b			Atxn7l3b			Atxn7l3b			Atxn7l3b			Atxn7l3b			Atxn7l3b			Atxn7l3b			Mme			Atxn7l3b			Atxn7l3b			Atxn7l3b			Atxn7l3b
Radx			Radx			Radx			Radx			Radx			Radx			Radx			H1f3			Radx			Radx			Radx			Radx
Fam102b			Fam102b			Fam102b			Fam102b			Fam102b			Fam102b			Fam102b			Atxn7l3b			Fam102b			Fam102b			Fam102b			Fam102b
Trp53i11			Trp53i11			Trp53i11			Trp53i11			Trp53i11			Trp53i11			Trp53i11			Radx			Trp53i11			Trp53i11			Trp53i11			Trp53i11
Emid1			Emid1			Emid1			Emid1			Emid1			Emid1			Emid1			Fam102b			Emid1			Emid1			Emid1			Emid1
Gm26673			Gm26673			Gm26673			Gm26673			Gm26673			Gm26673			Gm26673			Trp53i11			Gm26673			Gm26673			Gm26673			Gm26673
Cyp4f16			Cyp4f16			Cyp4f16			Cyp4f16			Cyp4f16			Cyp4f16			Cyp4f16			Emid1			Cyp4f16			Cyp4f16			Cyp4f16			Cyp4f16
Igtp			Igtp			Igtp			Igtp			Igtp			Igtp			Igtp			Gm26673			Igtp			Igtp			Igtp			Igtp
Ubtd2			Ubtd2			Ubtd2			Ubtd2			Ubtd2			Ubtd2			Ubtd2			Cyp4f16			Ubtd2			Ubtd2			Ubtd2			Ubtd2
Chst2			Chst2			Chst2			Chst2			Chst2			Chst2			Chst2			Igtp			Chst2			Chst2			Chst2			Chst2
Itpka			Itpka			Itpka			Itpka			Itpka			Itpka			Itpka			Ubtd2			Itpka			Itpka			Itpka			Itpka
Nr1d1			Nr1d1			Nr1d1			Nr1d1			Nr1d1			Nr1d1			Nr1d1			Chst2			Nr1d1			Nr1d1			Nr1d1			Nr1d1
Per3			Per3			Per3			Per3			Per3			Per3			Per3			Itpka			Per3			Per3			Per3			Per3
Ctxn1			Ctxn1			Ctxn1			Ctxn1			Ctxn1			Ctxn1			Ctxn1			Nr1d1			Ctxn1			Ctxn1			Ctxn1			Ctxn1
Rasa4			Rasa4			Rasa4			Rasa4			Rasa4			Rasa4			Rasa4			Per3			Rasa4			Rasa4			Rasa4			Rasa4
Sox10			Sox10			Sox10			Sox10			Sox10			Sox10			Sox10			Ctxn1			Sox10			Sox10			Sox10			Sox10
Smad9			Smad9			Smad9			Smad9			Smad9			Smad9			Smad9			Rasa4			Smad9			Smad9			Smad9			Smad9
Marchf1			Marchf1			Marchf1			Marchf1			Marchf1			Marchf1			Marchf1			Sox10			Marchf1			Marchf1			Marchf1			Marchf1
Rap2a			Rap2a			Rap2a			Rap2a			Rap2a			Rap2a			Rap2a			Smad9			Rap2a			Rap2a			Rap2a			Rap2a
Osbpl7			Osbpl7			Osbpl7			Osbpl7			Osbpl7			Osbpl7			Osbpl7			Marchf1			Osbpl7			Osbpl7			Osbpl7			Osbpl7
Pnkd			Pnkd			Pnkd			Pnkd			Pnkd			Pnkd			Pnkd			Rap2a			Pnkd			Pnkd			Pnkd			Pnkd
Apcdd1			Apcdd1			Apcdd1			Apcdd1			Apcdd1			Apcdd1			Apcdd1			Osbpl7			Apcdd1			Apcdd1			Apcdd1			Apcdd1
Rps6ka5			Rps6ka5			Rps6ka5			Rps6ka5			Rps6ka5			Rps6ka5			Rps6ka5			Pnkd			Rps6ka5			Rps6ka5			Rps6ka5			Rps6ka5
Slc1a3			Slc1a3			Slc1a3			Slc1a3			Slc1a3			Slc1a3			Slc1a3			Apcdd1			Slc1a3			Slc1a3			Slc1a3			Slc1a3
Gda			Gda			Gda			Gda			Gda			Gda			Gda			Rps6ka5			Gda			Gda			Gda			Gda
Gabrb3			Gabrb3			Gabrb3			Gabrb3			Gabrb3			Gabrb3			Gabrb3			Slc1a3			Gabrb3			Gabrb3			Gabrb3			Gabrb3
Chst11			Chst11			Chst11			Chst11			Chst11			Chst11			Chst11			Gda			Chst11			Chst11			Chst11			Chst11
Neurod4			Neurod4			Neurod4			Neurod4			Neurod4			Neurod4			Neurod4			Gabrb3			Neurod4			Neurod4			Neurod4			Neurod4
Plxnb3			Plxnb3			Plxnb3			Plxnb3			Plxnb3			Plxnb3			Plxnb3			Chst11			Plxnb3			Plxnb3			Plxnb3			Plxnb3
Zfp57			Zfp57			Zfp57			Zfp57			Zfp57			Zfp57			Zfp57			Neurod4			Zfp57			Zfp57			Zfp57			Zfp57
Cenpf			Cenpf			Cenpf			Cenpf			Cenpf			Cenpf			Cenpf			Plxnb3			Cenpf			Cenpf			Cenpf			Cenpf
Gpd2			Gpd2			Gpd2			Gpd2			Gpd2			Gpd2			Gpd2			Zfp57			Gpd2			Gpd2			Gpd2			Gpd2
Bmp2			Bmp2			Bmp2			Bmp2			Bmp2			Bmp2			Bmp2			Cenpf			Bmp2			Bmp2			Bmp2			Bmp2
Neurl1b			Neurl1b			Neurl1b			Neurl1b			Neurl1b			Neurl1b			Neurl1b			Gpd2			Neurl1b			Neurl1b			Neurl1b			Neurl1b
Sh3bp4			Sh3bp4			Sh3bp4			Sh3bp4			Sh3bp4			Sh3bp4			Sh3bp4			Bmp2			Sh3bp4			Sh3bp4			Sh3bp4			Sh3bp4
St14			St14			St14			St14			St14			St14			St14			Neurl1b			St14			St14			St14			St14
Kcnf1			Kcnf1			Kcnf1			Kcnf1			Kcnf1			Kcnf1			Kcnf1			Sh3bp4			Kcnf1			Kcnf1			Kcnf1			Kcnf1
Large1			Large1			Large1			Large1			Large1			Large1			Large1			St14			Large1			Large1			Large1			Large1
Myh14			Myh14			Myh14			Myh14			Myh14			Myh14			Myh14			Kcnf1			Myh14			Myh14			Myh14			Myh14
Nid1			Nid1			Nid1			Nid1			Nid1			Nid1			Nid1			Large1			Nid1			Nid1			Nid1			Nid1
Dbpht2			Dbpht2			Dbpht2			Dbpht2			Dbpht2			Dbpht2			Dbpht2			Myh14			Dbpht2			Dbpht2			Dbpht2			Dbpht2
Dach2			Dach2			Dach2			Dach2			Dach2			Dach2			Dach2			Nid1			Dach2			Dach2			Dach2			Dach2
Gucy1a2			Gucy1a2			Gucy1a2			Gucy1a2			Gucy1a2			Gucy1a2			Gucy1a2			Dbpht2			Gucy1a2			Gucy1a2			Gucy1a2			Gucy1a2
Insyn2b			Insyn2b			Insyn2b			Insyn2b			Insyn2b			Insyn2b			Insyn2b			Dach2			Insyn2b			Insyn2b			Insyn2b			Insyn2b
Rnf180			Rnf180			Rnf180			Rnf180			Rnf180			Rnf180			Rnf180			Gucy1a2			Rnf180			Rnf180			Rnf180			Rnf180
Ksr1			Ksr1			Ksr1			Ksr1			Ksr1			Ksr1			Ksr1			Insyn2b			Ksr1			Ksr1			Ksr1			Ksr1
Gm21984			Gm21984			Gm21984			Gm21984			Gm21984			Gm21984			Gm21984			Rnf180			Gm21984			Gm21984			Gm21984			Gm21984
Nrm			Nrm			Nrm			Nrm			Nrm			Nrm			Nrm			Ksr1			Nrm			Nrm			Nrm			Nrm
Acox3			Acox3			Acox3			Acox3			Acox3			Acox3			Acox3			Gm21984			Acox3			Acox3			Acox3			Acox3
Antxr1			Antxr1			Antxr1			Antxr1			Antxr1			Antxr1			Antxr1			Nrm			Antxr1			Antxr1			Antxr1			Antxr1
Ptprh			Ptprh			Ptprh			Ptprh			Ptprh			Ptprh			Ptprh			Acox3			Ptprh			Ptprh			Ptprh			Ptprh
Snx22			Snx22			Snx22			Snx22			Snx22			Snx22			Snx22			Antxr1			Snx22			Snx22			Snx22			Snx22
Ccnb1			Ccnb1			Ccnb1			Ccnb1			Ccnb1			Ccnb1			Ccnb1			Ptprh			Ccnb1			Ccnb1			Ccnb1			Ccnb1
Nova1			Nova1			Nova1			Nova1			Nova1			Nova1			Nova1			Snx22			Nova1			Nova1			Nova1			Nova1
Epha6			Epha6			Epha6			Epha6			Epha6			Epha6			Epha6			Ccnb1			Epha6			Epha6			Epha6			Epha6
Chst8			Chst8			Chst8			Chst8			Chst8			Chst8			Chst8			Nova1			Chst8			Chst8			Chst8			Chst8
Zfp503			Zfp503			Zfp503			Zfp503			Zfp503			Zfp503			Zfp503			Epha6			Zfp503			Zfp503			Zfp503			Zfp503
Rbp4			Rbp4			Rbp4			Rbp4			Rbp4			Rbp4			Rbp4			Chst8			Rbp4			Rbp4			Rbp4			Rbp4
Gm13629			Gm13629			Gm13629			Gm13629			Gm13629			Gm13629			Gm13629			Zfp503			Gm13629			Gm13629			Gm13629			Gm13629
Fscn1			Fscn1			Fscn1			Fscn1			Fscn1			Fscn1			Fscn1			Rbp4			Fscn1			Fscn1			Fscn1			Fscn1
Hcn4			Hcn4			Hcn4			Hcn4			Hcn4			Hcn4			Hcn4			Gm13629			Hcn4			Hcn4			Hcn4			Hcn4
Usp43			Usp43			Usp43			Usp43			Usp43			Usp43			Usp43			Fscn1			Usp43			Usp43			Usp43			Usp43
H2bc3			H2bc3			H2bc3			H2bc3			H2bc3			H2bc3			H2bc3			Hcn4			H2bc3			H2bc3			H2bc3			H2bc3
Ankrd6			Ankrd6			Ankrd6			Ankrd6			Ankrd6			Ankrd6			Ankrd6			Usp43			Ankrd6			Ankrd6			Ankrd6			Ankrd6
Col4a5			Col4a5			Col4a5			Col4a5			Col4a5			Col4a5			Col4a5			H2bc3			Col4a5			Col4a5			Col4a5			Col4a5
Zfp811			Zfp811			Zfp811			Zfp811			Zfp811			Zfp811			Zfp811			Ankrd6			Zfp811			Zfp811			Zfp811			Zfp811
Gm37056			Gm37056			Gm37056			Gm37056			Gm37056			Gm37056			Gm37056			Col4a5			Gm37056			Gm37056			Gm37056			Gm37056
A530041M06Rik			A530041M06Rik			A530041M06Rik			A530041M06Rik			A530041M06Rik			A530041M06Rik			A530041M06Rik			Zfp811			A530041M06Rik			A530041M06Rik			A530041M06Rik			A530041M06Rik
Tmem114			Tmem114			Tmem114			Tmem114			Tmem114			Tmem114			Tmem114			Gm37056			Tmem114			Tmem114			Tmem114			Tmem114
Gm42692			Gm42692			Gm42692			Gm42692			Gm42692			Gm42692			Gm42692			A530041M06Rik			Gm42692			Gm42692			Gm42692			Gm42692
Ccdc148			Ccdc148			Ccdc148			Ccdc148			Ccdc148			Ccdc148			Ccdc148			Tmem114			Ccdc148			Ccdc148			Ccdc148			Ccdc148
Cyria			Cyria			Cyria			Cyria			Cyria			Cyria			Cyria			Gm42692			Cyria			Cyria			Cyria			Cyria
Dlg4			Dlg4			Dlg4			Dlg4			Dlg4			Dlg4			Dlg4			Ccdc148			Dlg4			Dlg4			Dlg4			Dlg4
Ptgs2os2			Ptgs2os2			Ptgs2os2			Ptgs2os2			Ptgs2os2			Ptgs2os2			Ptgs2os2			Cyria			Ptgs2os2			Ptgs2os2			Ptgs2os2			Ptgs2os2
Gprin1			Gprin1			Gprin1			Gprin1			Gprin1			Gprin1			Gprin1			Dlg4			Gprin1			Gprin1			Gprin1			Gprin1
Fibcd1			Fibcd1			Fibcd1			Fibcd1			Fibcd1			Fibcd1			Fibcd1			Ptgs2os2			Fibcd1			Fibcd1			Fibcd1			Fibcd1
Gm19035			Gm19035			Gm19035			Gm19035			Gm19035			Gm19035			Gm19035			Gprin1			Gm19035			Gm19035			Gm19035			Gm19035
Cyth1			Cyth1			Cyth1			Cyth1			Cyth1			Cyth1			Cyth1			Fibcd1			Cyth1			Cyth1			Cyth1			Cyth1
Stx1a			Stx1a			Stx1a			Stx1a			Stx1a			Stx1a			Stx1a			Gm19035			Stx1a			Stx1a			Stx1a			Stx1a
Fzd10			Fzd10			Fzd10			Fzd10			Fzd10			Fzd10			Fzd10			Cyth1			Fzd10			Fzd10			Fzd10			Fzd10
Espn			Espn			Espn			Espn			Espn			Espn			Espn			Stx1a			Espn			Espn			Espn			Espn
Ncam1			Ncam1			Ncam1			Ncam1			Ncam1			Ncam1			Ncam1			Fzd10			Ncam1			Ncam1			Ncam1			Ncam1
Acp7			Acp7			Acp7			Acp7			Acp7			Acp7			Acp7			Espn			Acp7			Acp7			Acp7			Acp7
Gpr37			Gpr37			Gpr37			Gpr37			Gpr37			Gpr37			Gpr37			Ncam1			Gpr37			Gpr37			Gpr37			Gpr37
Inpp5k			Inpp5k			Inpp5k			Inpp5k			Inpp5k			Inpp5k			Inpp5k			Acp7			Inpp5k			Inpp5k			Inpp5k			Inpp5k
Rxrg			Rxrg			Rxrg			Rxrg			Rxrg			Rxrg			Rxrg			Gpr37			Rxrg			Rxrg			Rxrg			Rxrg
Fgf10			Fgf10			Fgf10			Fgf10			Fgf10			Fgf10			Fgf10			Inpp5k			Fgf10			Fgf10			Fgf10			Fgf10
Asb11			Asb11			Asb11			Asb11			Asb11			Asb11			Asb11			Rxrg			Asb11			Asb11			Asb11			Asb11
Rap1b			Rap1b			Rap1b			Rap1b			Rap1b			Rap1b			Rap1b			Fgf10			Rap1b			Rap1b			Rap1b			Rap1b
Adam33			Adam33			Adam33			Adam33			Adam33			Adam33			Adam33			Asb11			Adam33			Adam33			Adam33			Adam33
Syt9			Syt9			Syt9			Syt9			Syt9			Syt9			Syt9			Rap1b			Syt9			Syt9			Syt9			Syt9
Mroh1			Mroh1			Mroh1			Mroh1			Mroh1			Mroh1			Mroh1			Adam33			Mroh1			Mroh1			Mroh1			Mroh1
Tunar			Tunar			Tunar			Tunar			Tunar			Tunar			Tunar			Syt9			Tunar			Tunar			Tunar			Tunar
Plppr1			Plppr1			Plppr1			Plppr1			Plppr1			Plppr1			Plppr1			Mroh1			Plppr1			Plppr1			Plppr1			Plppr1
Tgfbr1			Tgfbr1			Tgfbr1			Tgfbr1			Tgfbr1			Tgfbr1			Tgfbr1			Tunar			Tgfbr1			Tgfbr1			Tgfbr1			Tgfbr1
Tpbg			Tpbg			Tpbg			Tpbg			Tpbg			Tpbg			Tpbg			Plppr1			Tpbg			Tpbg			Tpbg			Tpbg
Lrmda			Lrmda			Lrmda			Lrmda			Lrmda			Lrmda			Lrmda			Tgfbr1			Lrmda			Lrmda			Lrmda			Lrmda
Prss22			Prss22			Prss22			Prss22			Prss22			Prss22			Prss22			Tpbg			Prss22			Prss22			Prss22			Prss22
Usp54			Usp54			Usp54			Usp54			Usp54			Usp54			Usp54			Lrmda			Usp54			Usp54			Usp54			Usp54
F630042J09Rik			F630042J09Rik			F630042J09Rik			F630042J09Rik			F630042J09Rik			F630042J09Rik			F630042J09Rik			Prss22			F630042J09Rik			F630042J09Rik			F630042J09Rik			F630042J09Rik
Gm43210			Gm43210			Gm43210			Gm43210			Gm43210			Gm43210			Gm43210			Usp54			Gm43210			Gm43210			Gm43210			Gm43210
Htr2a			Htr2a			Htr2a			Htr2a			Htr2a			Htr2a			Htr2a			F630042J09Rik			Htr2a			Htr2a			Htr2a			Htr2a
Trim36			Trim36			Trim36			Trim36			Trim36			Trim36			Trim36			Gm43210			Trim36			Trim36			Trim36			Trim36
Nkain3			Nkain3			Nkain3			Nkain3			Nkain3			Nkain3			Nkain3			Htr2a			Nkain3			Nkain3			Nkain3			Nkain3
Gm43305			Gm43305			Gm43305			Gm43305			Gm43305			Gm43305			Gm43305			Trim36			Gm43305			Gm43305			Gm43305			Gm43305
Sv2c			Sv2c			Sv2c			Sv2c			Sv2c			Sv2c			Sv2c			Nkain3			Sv2c			Sv2c			Sv2c			Sv2c
Pdgfra			Pdgfra			Pdgfra			Pdgfra			Pdgfra			Pdgfra			Pdgfra			Gm43305			Pdgfra			Pdgfra			Pdgfra			Pdgfra
Hydin			Hydin			Hydin			Hydin			Hydin			Hydin			Hydin			Sv2c			Hydin			Hydin			Hydin			Hydin
Adcy2			Adcy2			Adcy2			Adcy2			Adcy2			Adcy2			Adcy2			Pdgfra			Adcy2			Adcy2			Adcy2			Adcy2
Dlx1			Dlx1			Dlx1			Dlx1			Dlx1			Dlx1			Dlx1			Hydin			Dlx1			Dlx1			Dlx1			Dlx1
Actn1			Actn1			Actn1			Actn1			Actn1			Actn1			Actn1			Adcy2			Actn1			Actn1			Actn1			Actn1
Plekhh2			Plekhh2			Plekhh2			Plekhh2			Plekhh2			Plekhh2			Plekhh2			Dlx1			Plekhh2			Plekhh2			Plekhh2			Plekhh2
Ptn			Ptn			Ptn			Ptn			Ptn			Ptn			Ptn			Actn1			Ptn			Ptn			Ptn			Ptn
Camk2n1			Camk2n1			Camk2n1			Camk2n1			Camk2n1			Camk2n1			Camk2n1			Plekhh2			Camk2n1			Camk2n1			Camk2n1			Camk2n1
Gm36855			Gm36855			Gm36855			Gm36855			Gm36855			Gm36855			Gm36855			Ptn			Gm36855			Gm36855			Gm36855			Gm36855
Gm32444			Gm32444			Gm32444			Gm32444			Gm32444			Gm32444			Gm32444			Camk2n1			Gm32444			Gm32444			Gm32444			Gm32444
Mrc1			Mrc1			Mrc1			Mrc1			Mrc1			Mrc1			Mrc1			Gm36855			Mrc1			Mrc1			Mrc1			Mrc1
Sgpp2			Sgpp2			Sgpp2			Sgpp2			Sgpp2			Sgpp2			Sgpp2			Gm32444			Sgpp2			Sgpp2			Sgpp2			Sgpp2
Plk4			Plk4			Plk4			Plk4			Plk4			Plk4			Plk4			Mrc1			Plk4			Plk4			Plk4			Plk4
Man1a2			Man1a2			Man1a2			Man1a2			Man1a2			Man1a2			Man1a2			Sgpp2			Man1a2			Man1a2			Man1a2			Man1a2
F630028O10Rik			F630028O10Rik			F630028O10Rik			F630028O10Rik			F630028O10Rik			F630028O10Rik			F630028O10Rik			Plk4			F630028O10Rik			F630028O10Rik			F630028O10Rik			F630028O10Rik
Kifc2			Kifc2			Kifc2			Kifc2			Kifc2			Kifc2			Kifc2			Man1a2			Kifc2			Kifc2			Kifc2			Kifc2
Fnbp1			Fnbp1			Fnbp1			Fnbp1			Fnbp1			Fnbp1			Fnbp1			F630028O10Rik			Fnbp1			Fnbp1			Fnbp1			Fnbp1
Arhgap33			Arhgap33			Arhgap33			Arhgap33			Arhgap33			Arhgap33			Arhgap33			Kifc2			Arhgap33			Arhgap33			Arhgap33			Arhgap33
Adamts18			Adamts18			Adamts18			Adamts18			Adamts18			Adamts18			Adamts18			Fnbp1			Adamts18			Adamts18			Adamts18			Adamts18
Il17rd			Il17rd			Il17rd			Il17rd			Il17rd			Il17rd			Il17rd			Arhgap33			Il17rd			Il17rd			Il17rd			Il17rd
Otogl			Otogl			Otogl			Otogl			Otogl			Otogl			Otogl			Adamts18			Otogl			Otogl			Otogl			Otogl
B230206L02Rik			B230206L02Rik			B230206L02Rik			B230206L02Rik			B230206L02Rik			B230206L02Rik			B230206L02Rik			Il17rd			B230206L02Rik			B230206L02Rik			B230206L02Rik			B230206L02Rik
Mir384			Mir384			Mir384			Mir384			Mir384			Mir384			Mir384			Otogl			Mir384			Mir384			Mir384			Mir384
Akap5			Akap5			Akap5			Akap5			Akap5			Akap5			Akap5			B230206L02Rik			Akap5			Akap5			Akap5			Akap5
Fbln2			Fbln2			Fbln2			Fbln2			Fbln2			Fbln2			Fbln2			Mir384			Fbln2			Fbln2			Fbln2			Fbln2
Gm41804			Gm41804			Gm41804			Gm41804			Gm41804			Gm41804			Gm41804			Akap5			Gm41804			Gm41804			Gm41804			Gm41804
Man1a			Man1a			Man1a			Man1a			Man1a			Man1a			Man1a			Fbln2			Man1a			Man1a			Man1a			Man1a
Nipal2			Nipal2			Nipal2			Nipal2			Nipal2			Nipal2			Nipal2			Gm41804			Nipal2			Nipal2			Nipal2			Nipal2
Ttc22			Ttc22			Ttc22			Ttc22			Ttc22			Ttc22			Ttc22			Man1a			Ttc22			Ttc22			Ttc22			Ttc22
Cd200			Cd200			Cd200			Cd200			Cd200			Cd200			Cd200			Nipal2			Cd200			Cd200			Cd200			Cd200
Plk5			Plk5			Plk5			Plk5			Plk5			Plk5			Plk5			Ttc22			Plk5			Plk5			Plk5			Plk5
Cort			Cort			Cort			Cort			Cort			Cort			Cort			Cd200			Cort			Cort			Cort			Cort
Vstm5			Vstm5			Vstm5			Vstm5			Vstm5			Vstm5			Vstm5			Plk5			Vstm5			Vstm5			Vstm5			Vstm5
Ptgfrn			Ptgfrn			Ptgfrn			Ptgfrn			Ptgfrn			Ptgfrn			Ptgfrn			Cort			Ptgfrn			Ptgfrn			Ptgfrn			Ptgfrn
Gm49512			Gm49512			Gm49512			Gm49512			Gm49512			Gm49512			Gm49512			Vstm5			Gm49512			Gm49512			Gm49512			Gm49512
Vsig2			Vsig2			Vsig2			Vsig2			Vsig2			Vsig2			Vsig2			Ptgfrn			Vsig2			Vsig2			Vsig2			Vsig2
Gm4777			Gm4777			Gm4777			Gm4777			Gm4777			Gm4777			Gm4777			Gm49512			Gm4777			Gm4777			Gm4777			Gm4777
Gbp11			Gbp11			Gbp11			Gbp11			Gbp11			Gbp11			Gbp11			Vsig2			Gbp11			Gbp11			Gbp11			Gbp11
Rsph4a			Rsph4a			Rsph4a			Rsph4a			Rsph4a			Rsph4a			Rsph4a			Gm4777			Rsph4a			Rsph4a			Rsph4a			Rsph4a
Rflnb			Rflnb			Rflnb			Rflnb			Rflnb			Rflnb			Rflnb			Gbp11			Rflnb			Rflnb			Rflnb			Rflnb
Fnbp1l			Fnbp1l			Fnbp1l			Fnbp1l			Fnbp1l			Fnbp1l			Fnbp1l			Rsph4a			Fnbp1l			Fnbp1l			Fnbp1l			Fnbp1l
2410137M14Rik			2410137M14Rik			2410137M14Rik			2410137M14Rik			2410137M14Rik			2410137M14Rik			2410137M14Rik			Rflnb			2410137M14Rik			2410137M14Rik			2410137M14Rik			2410137M14Rik
Hes5			Hes5			Hes5			Hes5			Hes5			Hes5			Hes5			Fnbp1l			Hes5			Hes5			Hes5			Hes5
Hrh1			Hrh1			Hrh1			Hrh1			Hrh1			Hrh1			Hrh1			2410137M14Rik			Hrh1			Hrh1			Hrh1			Hrh1
Xaf1			Xaf1			Xaf1			Xaf1			Xaf1			Xaf1			Xaf1			Hes5			Xaf1			Xaf1			Xaf1			Xaf1
Depdc7			Depdc7			Depdc7			Depdc7			Depdc7			Depdc7			Depdc7			Hrh1			Depdc7			Depdc7			Depdc7			Depdc7
Bag3			Bag3			Bag3			Bag3			Bag3			Bag3			Bag3			Xaf1			Bag3			Bag3			Bag3			Bag3
Rn7s1			Rn7s1			Rn7s1			Rn7s1			Rn7s1			Rn7s1			Rn7s1			Depdc7			Rn7s1			Rn7s1			Rn7s1			Rn7s1
Olfr1372-ps1			Olfr1372-ps1			Olfr1372-ps1			Olfr1372-ps1			Olfr1372-ps1			Olfr1372-ps1			Olfr1372-ps1			Bag3			Olfr1372-ps1			Olfr1372-ps1			Olfr1372-ps1			Olfr1372-ps1
Trpc5			Trpc5			Trpc5			Trpc5			Trpc5			Trpc5			Trpc5			Rn7s1			Trpc5			Trpc5			Trpc5			Trpc5
Hdac9			Hdac9			Hdac9			Hdac9			Hdac9			Hdac9			Hdac9			Olfr1372-ps1			Hdac9			Hdac9			Hdac9			Hdac9
C1ra			C1ra			C1ra			C1ra			C1ra			C1ra			C1ra			Trpc5			C1ra			C1ra			C1ra			C1ra
Plekhh1			Plekhh1			Plekhh1			Plekhh1			Plekhh1			Plekhh1			Plekhh1			Hdac9			Plekhh1			Plekhh1			Plekhh1			Plekhh1
Gm6089			Gm6089			Gm6089			Gm6089			Gm6089			Gm6089			Gm6089			C1ra			Gm6089			Gm6089			Gm6089			Gm6089
Cfap61			Cfap61			Cfap61			Cfap61			Cfap61			Cfap61			Cfap61			Plekhh1			Cfap61			Cfap61			Cfap61			Cfap61
Steap3			Steap3			Steap3			Steap3			Steap3			Steap3			Steap3			Gm6089			Steap3			Steap3			Steap3			Steap3
Grem2			Grem2			Grem2			Grem2			Grem2			Grem2			Grem2			Cfap61			Grem2			Grem2			Grem2			Grem2
Sh2d4b			Sh2d4b			Sh2d4b			Sh2d4b			Sh2d4b			Sh2d4b			Sh2d4b			Steap3			Sh2d4b			Sh2d4b			Sh2d4b			Sh2d4b
Olfr111			Olfr111			Olfr111			Olfr111			Olfr111			Olfr111			Olfr111			Grem2			Olfr111			Olfr111			Olfr111			Olfr111
Scube2			Scube2			Scube2			Scube2			Scube2			Scube2			Scube2			Sh2d4b			Scube2			Scube2			Scube2			Scube2
Cnksr3			Cnksr3			Cnksr3			Cnksr3			Cnksr3			Cnksr3			Cnksr3			Olfr111			Cnksr3			Cnksr3			Cnksr3			Cnksr3
Kcnj16			Kcnj16			Kcnj16			Kcnj16			Kcnj16			Kcnj16			Kcnj16			Scube2			Kcnj16			Kcnj16			Kcnj16			Kcnj16
Emp2			Emp2			Emp2			Emp2			Emp2			Emp2			Emp2			Cnksr3			Emp2			Emp2			Emp2			Emp2
F2r			F2r			F2r			F2r			F2r			F2r			F2r			Kcnj16			F2r			F2r			F2r			F2r
Cd84			Cd84			Cd84			Cd84			Cd84			Cd84			Cd84			Emp2			Cd84			Cd84			Cd84			Cd84
Map7			Map7			Map7			Map7			Map7			Map7			Map7			F2r			Map7			Map7			Map7			Map7
Dgka			Dgka			Dgka			Dgka			Dgka			Dgka			Dgka			Cd84			Dgka			Dgka			Dgka			Dgka
Nrn1			Nrn1			Nrn1			Nrn1			Nrn1			Nrn1			Nrn1			Map7			Nrn1			Nrn1			Nrn1			Nrn1
AI854703			AI854703			AI854703			AI854703			AI854703			AI854703			AI854703			Dgka			AI854703			AI854703			AI854703			AI854703
St8sia5			St8sia5			St8sia5			St8sia5			St8sia5			St8sia5			St8sia5			Nrn1			St8sia5			St8sia5			St8sia5			St8sia5
Arhgef15			Arhgef15			Arhgef15			Arhgef15			Arhgef15			Arhgef15			Arhgef15			AI854703			Arhgef15			Arhgef15			Arhgef15			Arhgef15
Gm33869			Gm33869			Gm33869			Gm33869			Gm33869			Gm33869			Gm33869			St8sia5			Gm33869			Gm33869			Gm33869			Gm33869
C330018A13Rik			C330018A13Rik			C330018A13Rik			C330018A13Rik			C330018A13Rik			C330018A13Rik			C330018A13Rik			Arhgef15			C330018A13Rik			C330018A13Rik			C330018A13Rik			C330018A13Rik
Sprn			Sprn			Sprn			Sprn			Sprn			Sprn			Sprn			Gm33869			Sprn			Sprn			Sprn			Sprn
Coro6			Coro6			Coro6			Coro6			Coro6			Coro6			Coro6			C330018A13Rik			Coro6			Coro6			Coro6			Coro6
Ttyh2			Ttyh2			Ttyh2			Ttyh2			Ttyh2			Ttyh2			Ttyh2			Sprn			Ttyh2			Ttyh2			Ttyh2			Ttyh2
Ttll5			Ttll5			Ttll5			Ttll5			Ttll5			Ttll5			Ttll5			Coro6			Ttll5			Ttll5			Ttll5			Ttll5
Rap2b			Rap2b			Rap2b			Rap2b			Rap2b			Rap2b			Rap2b			Ttyh2			Rap2b			Rap2b			Rap2b			Rap2b
Rem2			Rem2			Rem2			Rem2			Rem2			Rem2			Rem2			Ttll5			Rem2			Rem2			Rem2			Rem2
Mmd			Mmd			Mmd			Mmd			Mmd			Mmd			Mmd			Rap2b			Mmd			Mmd			Mmd			Mmd
Cd209a			Cd209a			Cd209a			Cd209a			Cd209a			Cd209a			Cd209a			Rem2			Cd209a			Cd209a			Cd209a			Cd209a
Tmem150c			Tmem150c			Tmem150c			Tmem150c			Tmem150c			Tmem150c			Tmem150c			Mmd			Tmem150c			Tmem150c			Tmem150c			Tmem150c
Tmem267			Tmem267			Tmem267			Tmem267			Tmem267			Tmem267			Tmem267			Cd209a			Tmem267			Tmem267			Tmem267			Tmem267
Chd7			Chd7			Chd7			Chd7			Chd7			Chd7			Chd7			Tmem150c			Chd7			Chd7			Chd7			Chd7
E2f3			E2f3			E2f3			E2f3			E2f3			E2f3			E2f3			Tmem267			E2f3			E2f3			E2f3			E2f3
Gja5			Gja5			Gja5			Gja5			Gja5			Gja5			Gja5			Chd7			Gja5			Gja5			Gja5			Gja5
Lrrc10b			Lrrc10b			Lrrc10b			Lrrc10b			Lrrc10b			Lrrc10b			Lrrc10b			E2f3			Lrrc10b			Lrrc10b			Lrrc10b			Lrrc10b
Arsg			Arsg			Arsg			Arsg			Arsg			Arsg			Arsg			Gja5			Arsg			Arsg			Arsg			Arsg
Cdh11			Cdh11			Cdh11			Cdh11			Cdh11			Cdh11			Cdh11			Lrrc10b			Cdh11			Cdh11			Cdh11			Cdh11
Spata2l			Spata2l			Spata2l			Spata2l			Spata2l			Spata2l			Spata2l			Arsg			Spata2l			Spata2l			Spata2l			Spata2l
Ubb-ps			Ubb-ps			Ubb-ps			Ubb-ps			Ubb-ps			Ubb-ps			Ubb-ps			Cdh11			Ubb-ps			Ubb-ps			Ubb-ps			Ubb-ps
Mdga1			Mdga1			Mdga1			Mdga1			Mdga1			Mdga1			Mdga1			Spata2l			Mdga1			Mdga1			Mdga1			Mdga1
Abi3bp			Abi3bp			Abi3bp			Abi3bp			Abi3bp			Abi3bp			Abi3bp			Ubb-ps			Abi3bp			Abi3bp			Abi3bp			Abi3bp
Bcas1			Bcas1			Bcas1			Bcas1			Bcas1			Bcas1			Bcas1			Mdga1			Bcas1			Bcas1			Bcas1			Bcas1
Cdr1os			Cdr1os			Cdr1os			Cdr1os			Cdr1os			Cdr1os			Cdr1os			Abi3bp			Cdr1os			Cdr1os			Cdr1os			Cdr1os
Gnb4			Gnb4			Gnb4			Gnb4			Gnb4			Gnb4			Gnb4			Bcas1			Gnb4			Gnb4			Gnb4			Gnb4
Rn18s-rs5			Rn18s-rs5			Rn18s-rs5			Rn18s-rs5			Rn18s-rs5			Rn18s-rs5			Rn18s-rs5			Cdr1os			Rn18s-rs5			Rn18s-rs5			Rn18s-rs5			Rn18s-rs5
Efnb3			Efnb3			Efnb3			Efnb3			Efnb3			Efnb3			Efnb3			Gnb4			Efnb3			Efnb3			Efnb3			Efnb3
Septin4			Septin4			Septin4			Septin4			Septin4			Septin4			Septin4			Rn18s-rs5			Septin4			Septin4			Septin4			Septin4
Lars2			Lars2			Lars2			Lars2			Lars2			Lars2			Lars2			Efnb3			Lars2			Lars2			Lars2			Lars2
Il33			Il33			Il33			Il33			Il33			Il33			Il33			Septin4			Il33			Il33			Il33			Il33
Erbin			Erbin			Erbin			Erbin			Erbin			Erbin			Erbin			Lars2			Erbin			Erbin			Erbin			Erbin
Cx3cl1			Cx3cl1			Cx3cl1			Cx3cl1			Cx3cl1			Cx3cl1			Cx3cl1			Il33			Cx3cl1			Cx3cl1			Cx3cl1			Cx3cl1
Gm44171			Gm44171			Gm44171			Gm44171			Gm44171			Gm44171			Gm44171			Erbin			Gm44171			Gm44171			Gm44171			Gm44171
Etnppl			Etnppl			Etnppl			Etnppl			Etnppl			Etnppl			Etnppl			Cx3cl1			Etnppl			Etnppl			Etnppl			Etnppl
Snca			Snca			Snca			Snca			Snca			Snca			Snca			Gm44171			Snca			Snca			Snca			Snca
Baiap2			Baiap2			Baiap2			Baiap2			Baiap2			Baiap2			Baiap2			Etnppl			Baiap2			Baiap2			Baiap2			Baiap2
Rbm3			Rbm3			Rbm3			Rbm3			Rbm3			Rbm3			Rbm3			Snca			Rbm3			Rbm3			Rbm3			Rbm3
Gm49745			Gm49745			Gm49745			Gm49745			Gm49745			Gm49745			Gm49745			Baiap2			Gm49745			Gm49745			Gm49745			Gm49745
Gm34776			Gm34776			Gm34776			Gm34776			Gm34776			Gm34776			Gm34776			Rbm3			Gm34776			Gm34776			Gm34776			Gm34776
Pak6			Pak6			Pak6			Pak6			Pak6			Pak6			Pak6			Gm49745			Pak6			Pak6			Pak6			Pak6
Gap43			Gap43			Gap43			Gap43			Gap43			Gap43			Gap43			Gm34776			Gap43			Gap43			Gap43			Gap43
Cyp26b1			Cyp26b1			Cyp26b1			Cyp26b1			Cyp26b1			Cyp26b1			Cyp26b1			Pak6			Cyp26b1			Cyp26b1			Cyp26b1			Cyp26b1
Acta2			Acta2			Acta2			Acta2			Acta2			Acta2			Acta2			Gap43			Acta2			Acta2			Acta2			Acta2
Dhcr24			Dhcr24			Dhcr24			Dhcr24			Dhcr24			Dhcr24			Dhcr24			Cyp26b1			Dhcr24			Dhcr24			Dhcr24			Dhcr24
Mobp			Mobp			Mobp			Mobp			Mobp			Mobp			Mobp			Acta2			Mobp			Mobp			Mobp			Mobp
Gm9946			Gm9946			Gm9946			Gm9946			Gm9946			Gm9946			Gm9946			Dhcr24			Gm9946			Gm9946			Gm9946			Gm9946
Tmem64			Tmem64			Tmem64			Tmem64			Tmem64			Tmem64			Tmem64			Mobp			Tmem64			Tmem64			Tmem64			Tmem64
Wwc1			Wwc1			Wwc1			Wwc1			Wwc1			Wwc1			Wwc1			Gm9946			Wwc1			Wwc1			Wwc1			Wwc1
Gm42503			Gm42503			Gm42503			Gm42503			Gm42503			Gm42503			Gm42503			Tmem64			Gm42503			Gm42503			Gm42503			Gm42503
Serpina3n			Serpina3n			Serpina3n			Serpina3n			Serpina3n			Serpina3n			Serpina3n			Wwc1			Serpina3n			Serpina3n			Serpina3n			Serpina3n
Plekha2			Plekha2			Plekha2			Plekha2			Plekha2			Plekha2			Plekha2			Gm42503			Plekha2			Plekha2			Plekha2			Plekha2
Vstm2a			Vstm2a			Vstm2a			Vstm2a			Vstm2a			Vstm2a			Vstm2a			Serpina3n			Vstm2a			Vstm2a			Vstm2a			Vstm2a
Ermn			Ermn			Ermn			Ermn			Ermn			Ermn			Ermn			Plekha2			Ermn			Ermn			Ermn			Ermn
Homer2			Homer2			Homer2			Homer2			Homer2			Homer2			Homer2			Vstm2a			Homer2			Homer2			Homer2			Homer2
Nptx2			Nptx2			Nptx2			Nptx2			Nptx2			Nptx2			Nptx2			Ermn			Nptx2			Nptx2			Nptx2			Nptx2
Cbln2			Cbln2			Cbln2			Cbln2			Cbln2			Cbln2			Cbln2			Homer2			Cbln2			Cbln2			Cbln2			Cbln2
																					Nptx2
																					Cbln2

## Sheet: HIP YvM
Positive regulation of inflammatory response	1		Negative regulation of inflammatory response	3		Interferon-mediated signalling	0		Interleukin-mediated signalling	0		DAMs 2021	0		Microglial Exhaustion	0		Inflammasomes	0		cGAS-STING	0		Tfam-/-	0		LINE1 Derepression	0		TE Regulation	1		H3K9me3 proteome
Abcc1	C3		Abr	Gpr17		Adar			Akt1			4632427E13Rik			Ager			Aim2			Akt1			Abi3bp			Bst2			Actb	Uhrf1		BCLAF1
Adam8			Acod1	Hgf		Arg1			C1qtnf4			9130401M01Rik			Anxa1			Casp1			Aurkb			Agrn			Cxcl10			Actl6a			CHTOP
Adora2b			Acp5	Pbk		Cactin			Casp4			Acaca			Bcl6			Casp4			Banf1			Apol9b			Ifi204			Actl6b			Crebrf
Adora3			Ada			Cdc37			Cd300lf			Ache			Ccl2			Ddx3x			Cdk1			Bst2			Ifi27			Ago2			CBX1
Aim2			Adcyap1			Cnot7			Cd4			Adarb1			Ccr2			Dhx33			Cgas			Ccl2			Ifi30			Alkbh5			CBX3
Alox5ap			Adipoq			Dcst1			Cebpa			Adck5			Ccr5			Gsdmd			Ifi204			Cmpk2			Ifih1			Arid1a			CBX5
Aoc3			Adora1			Dnaja3			Csf2rb			Ank			Cd244a			Il18			Irf3			Cxcl10			Ifit1			Arid1b			CCDC137
App			Adora2a			Eif4e2			Csf2rb2			Ankrd16			Cd274			Il1b			Irf9			Dhx58			Ifit2			Arid2			CCDC59
Btk			Ahr			Fadd			Ctr9			Apbb2			Cd38			Naip1			Lyplal1			Dtx3l			Ifit3			Atf7ip			CCDC86
C2cd4a			Alox5			Gigyf2			Cxcr2			Aplp2			Cd72			Naip2			Map3k7			Enpep			Ifitm1			Atrx			CEBPZ
C2cd4b			Aoah			Hdac4			Cyld			Apoe			Cd74			Naip5			Nfkb1			Enpp2			Ifitm3			Bap1			CHAF1A
C3			Apoa1			Hpx			Egr1			Aprt			Cd86			Naip6			Parp1			Gbp2			Ifna1			Bcl7a			YBX3
Camk2n1			Apoe			Ifih1			Fcer1g			Arap2			Clec7a			Nlrc4			Ppp6c			Gbp3			Ifna2			Bcl7b			CUX1
Casp1			Arnt			Ifitm1			Fer			Arrdc4			Csf1			Nlrp1a			Prkdc			Gbp7			Ifne			Bcl7c			DDX17
Casp4			Ash1l			Ifitm2			Gab1			Asb10			Cxcl10			Nlrp1b			Sting1			H2-Q4			Irf5			Bicra			DDX5
Ccl1			Bcr			Ifitm3			Gfi1			Atf3			Entpd1			Nlrp3			Tab1			Helz2			Isg15			Bicral			EBNA1BP2
Ccl3			C1qtnf3			Ifitm6			Ikbkb			Atp11c			Havcr2			Nlrp6			Tbk1			Ifi35			Jak1			Brd4			ERH
Ccl5			C1qtnf12			Ifitm7			Ikbke			Atp6v0c			Icos			Pycard			Zbp1			Ifi44			Mal			Brd7			EXOSC10
Ccl24			Ccn3			Ifna1			Il11			Atp6v0c-ps2			Il2rb						Zdhhc18			Ifih1			Mx1			Brd9			FUS
Ccn4			Cd24a			Ifnar1			Il11ra1			Axl			Il33						Zdhhc9			Ifit1			Mx2			Cbx1			FYTTD1
Ccr2			Cd44			Ifnar2			Il11ra2			Baiap2l2			Il7r									Ifit3			Oas2			Cbx3			GATAD2A
Ccr5			Cd200			Ifnb1						Bcl2a1b			Kit									Ifit3b			Rigi			Cbx5			GATAD2B
Ccr7			Cd200l1			Ifng			Il12a			Birc5			Klf4									Igtp			Stat1			Cdk2ap1			Nop53
Cd24a			Cd200l2			Ifngr1			Il12b			Bola2			Lag3									Iigp1			Stat3			Cdk2ap2			HDLBP
Cd28			Cd200r1			Ifngr2			Il12rb1			Cadm1			Ly96									Irf7			Tnfsf10			Chaf1a			HMGA1
Cd47			Cd276			Igtp			Il12rb2			Capg			Myd88									Irf9						Chaf1b			HNRNPA2B1
Cd81			Cdh5			Ikbke			Il15			Ccdc88a			Nfkb1									Irgm1						Chd3			HNRNPK
Cebpa			Chrna7			Irak1			Il15ra			Ccl3			P2rx7									Irgm2						Chd4			HNRNPL
Cebpb			Cst7			Irf1			Il17a			Ccl4			Pdcd1									Isg15						Chd5			HP1BP3
Clock			Ctla2a			Irf3			Il17f			Ccl6			Prickle1									Lgals3bp						Ctcf			KHDRBS1
Cnr1			Cx3cr1			Irf7			Il17ra			Cd22			S100a8									Mx2						Daxx			KHDRBS3
Csf1r			Cxcl17			Irgm1			Il17rc			Cd34			Satb1									Oas1a						Ddx4			LLPH
Ctsc			Cyld			Irgm2			Il18			Cd52			Sirpa									Oasl2						Dgcr8			LOXL1
Ctss			Cyp19a1			Isg15			Il18r1			Cd63			Socs3									Parp10						Dhx9			LOXL2
Ddt			Dusp10			Jak1			Il18rap			Cd74			Spp1									Parp14						Dicer1			LTBP2
Dhx9			Elf4			Jak2			Il1a			Cd83			Stat1									Parp9						Dnmt1			MATR3
Ets1			Enpp3			Lsm14a			Il1b			Cd9			Tcf7									Psmb8						Dnmt3a			MBD3
Fabp4			Ets1			Mavs			Il1r1			Cdc42ep3			Ticam1									Rigi						Dnmt3b			MBNL1
Fcer1a			Extl3			Med1			Il1r2			Cdca8			Ticam2									Rnf213						Dnmt3c			MPHOSPH10
Fcer1g			Fcgr2b			Mettl3			Il1rap			Ch25h			Tirap									Rtp4						Dnmt3l			MRTO4
Fcgr1			Fem1a			Mmp12			Il1rl1			Chst1												Sim2						Dpf1			MYBBP1A
Fcgr3			Fem1al			Mul1			Il1rn			Clec7a												Slfn2						Dpf2			MYEF2
Fem1a			Ffar4			Myd88			Il2			Cops9												Stat1						Dpf3			NCOA5
Ffar2			Fndc4			Nlrc5			Il2ra			Cox6a2												Stat2						Drosha			NCOA7
Ffar3			Foxf1			Oas1a			Il2rb			Cox6c												Tgtp1						Ehmt1			NONO
Gpr4			Foxp3			Oas1b			Il2rg			Cpd												Trim30a						Ehmt2			PES1
Gprc5b			Fpr2			Oas1c			Il3			Crip1												Trim30d						Elp3			PHB
Gpsm3			Fpr3			Oas1d			Il33			Crlf2												Usp18						Fto			PIAS2
Grn			Fpr-rs3			Oas1e			Il34			Csf1												Xaf1						Gatad2a			POLDIP3
Gsdmd			Fpr-rs4			Oas1f			Il3ra			Csf2ra												Zbp1						Gatad2b			PPAN
H2-D1			Fpr-rs6			Oas1g			Il4			Cst7																		Gtsf1			PPHLN1
H2-K1			Fpr-rs7			Oas1h			Il4ra			Ctsb																		H3f3a			PRDM15
H2-M1			Fxr1			Oas2			Il5			Ctsz																		H3f3b			PRMT1
H2-M2			Gata3			Oas3			Il5ra			Cxcl16																		H3f3c			PRRX2
H2-M5			Ghrl			Otop1			Il6			Cybb																		Hdac1			PTBP1
H2-M9			Ghsr			Parp9			Il6ra			Dhcr7																		Hdac2			QKI
H2-M10.1			Git1			Parp14			Il6st			Dhx32																		Hinfp			RBM12B1
H2-M10.2			Gper1			Pparg			Il9r			Dnajc15																		Kmt5b			RBM15
H2-M10.3			Gpr17			Ptpn2			Irak1			Dpcd																		Kmt5c			RBM26
H2-M10.4			Gpr31b			Rbm47			Irak2			Dpp7																		Lig1			RBM6
H2-M10.5			Gps2			Rfpl4b			Irak3			Dusp3																		Mbd2			RBMX
H2-M10.6			Gpx1			Rnf185			Irak4			Echs1																		Mbd3			RBMXL1
H2-M11			Gpx2			Samhd1			Jak1			Egr2																		Mbd5			RELA
H2-Q1			Grn			Sin3a			Jak2			Ell2																		Mbd6			RIF1
H2-Q2			Gstp1			Smim30			Jak3			Enpp1																		Mettl14			RPF1
H2-Q4			Hamp			Stat1			Lyn			Enpp2																		Mettl16			RPF2
H2-Q6			Hgf			Stat2			Map3k7			Ero1b																		Mettl3			RPS19BP1
H2-Q7			Ier3			Sting1			Mapk3			Etl4																		Morc1			SAFB
H2-Q10			Igf1			Tbk1			Mir301			Fam20c																		Morc2a			SAFB2
H2-T3			Igtp			Trex1			Myd88			Fcgr4																		Morc2b			SETDB1
H2-T9			Il2			Trim6			Nfkbia			Fgl2																		Morc3			SFPQ
H2-T10			Il2ra			Trim41			Nlrp6			Frrs1																		Mov10l1			TRA2B
H2-T22			Il4			Trim56			Notch1			Fth1																		Mphosph8			SLTM
H2-T23			Il10			Trim65			Oas2			Ftl1																		Mta1			SUMO2
Hyal2			Il10ra			Trp53			Oasl1			Fxyd5																		Mta2			SUV39H1
Ido1			Il12b			Ttll12			Oasl2			Fxyd6																		Mta3			SUV39H2
Ifi35			Il13			Txk			Otud4			Gfus																		Mtr4			SUZ12
Ifng			Il17a			Tyk2			Parp14			Glipr1																		Nsun2			TAF15
Ighg1			Il20rb			Ube2k			Pdgfb			Gm15772																		Ogt			TARDBP
Ighg2b			Il22			Usp27x			Pik3r1			Gnas																		Pabpn1			TCF25
Il1b			Il22ra1			Usp29			Plcb1			Gng12																		Pbrm1			THRAP3
Il1rl1			Il22ra2			Wnt5a			Ptpn2			Got1																		Phf10			TRA2A
Il6			Il33			Ythdf2			Rela			Gpnmb																		Piwil1			TRIM28
Il16			Ins1			Ythdf3			Ripk1			Gpr65																		Piwil2			UBE2I
Il17ra			Ins2			Zbp1			Rps6ka4			Gusb																		Piwil4			UTP3
Il17rb			Irgm1						Rps6ka5			H2-D1																		Pld6			WDR46
Il18			Irgm2						Smad4			H2-K1																		Pphln1			XRN2
Il33			Isl1						Spi1			H2-Q7																		Pspc1			YBX1
Kars1			Krt1						Src			Hif1a																		Rbbp4			YLPM1
Kcnn4			Ldlr						Srsf1			Ifi204																		Rbbp7			YTHDC1
Lbp			Lgals9						St18			Ifi27l2a																		Rbm26			YY2
Ldlr			Lpcat3						Stat1			Ifi27l2b																		Rbm27			ZC3H13
Lgals1			Lrfn5						Stat3			Ifit1																		Rbm7			Zfp207
Lgals2			Macir						Stat4			Ifit2																		Safb			Zfp326
Lilra5			Mdk						Stat5a			Igf1																		Safb2			Zfp438
Lpl			Mefv						Stat6			Il1b																		Setdb1			Zfp512
Lrrk2			Metrnl						Syk			Ildr2																		Setdb2			Zfp598
Lta			Mfhas1						Ticam2			Itgax																		Sin3a			Zfp622
Mdk			Mir147						Tirap			Kcnj2																		Sinhcaf			Zfp638
Mefv			Mir7578						Tnip2			Lgals3bp																		Sirt1
Mmp8			Mkrn2						Tollip			Lgi2																		Sirt6
Napepld			Muc19						Traf2			Lmbrd2																		Sltm
Nfkbia			Mvk						Traf3ip2			Lpl																		Smarca2
Nfkbiz			Ndfip1						Traf5			Lyz2																		Smarca4
Ninj1			Nfkb1						Traf6			Lyzl4																		Smarcb1
Nkg7			Nlrc3						Trim32			Mamdc2																		Smarcc1
Nlrp1a			Nlrp3						Tut4			Mblac2																		Smarcc2
Nlrp1b			Nlrp6						Tyk2			Mif																		Smarcd1
Nlrp3			Nlrp12						Usp25			Mir682																		Smarcd2
Nlrp6			Nlrx1						Vrk2			Mrpl27																		Smarcd3
Nlrp10			Nod2						Yap1			Mt1																		Smarce1
Nmi			Npy						Zbp1			Myo1e																		Spen
Nppa			Npy5r									Naglu																		Spocd1
Npy5r			Nr1d1									Nat8l																		Ss18
Nupr1			Nr1d2									Ncbp2as2																		Ss18l1
Osm			Nr1h3									Nceh1																		Ss18l2
Park7			Nr1h4									Ndufv3																		Sumo2
Pdcd4			Nr1h5									Nlrc5																		Suv39h1
Pde2a			Nt5e									Npc2																		Suv39h2
Pde5a			Otulin									Pkib																		Tarbp2
Pik3cg			Pbk									Pld3																		Tasor
Pla2g3			Pdcd10									Pogk																		Tasor2
Plcg2			Pf4									Psat1																		Tet1
Prkca			Pglyrp1									Pycrl																		Tet2
Ptger3			Pla2g5									Ramp1																		Tex15
Ptger4			Pla2g10									Rap2b																		Tnrc18
Ptgs2			Ppara									Rpl23																		Trim28
Pycard			Ppard									Rps18																		Uhrf1
Ripk1			Pparg									Rras																		Uhrf2
Rps19			Proc									S1pr1																		Wiz
S100a8			Psma1									Scd2																		Wtap
S100a9			Psmb4									Scpep1																		Ytdc1
Serpine1			Ptger4									Sdc3																		Ytdc2
Setd4			Ptgis									Serpine2																		Ytdfh2
Snca			Ptpn2									Slamf9																		Ytdhf3
Snx4			Ptpn6									Slc1a2																		Ythdf1
Stap1			Rabgef1									Slc23a2																		Yy1
Stat5a			Rb1									Slc44a1																		Zc3h13
Stat5b			Reg3g									Speg																		Zc3h3
Sucnr1			Rora									Spp1																		Zcchc8
Tac1			Rps19									Srebf2																		Zfc3h1
Tafa3			Selenos									Ssh1
Tgfb1			Sharpin									Ssr4
Tlr2			Siglece									St14
Tlr4			Siglecg									St8sia6
Tlr6			Sirpa									Stim2
Tnf			Slamf8									Sulf2
Tnfrsf1a			Slc39a8									Syngr1
Tnfrsf11a			Smad3									Tbcd
Tnfsf4			Smpdl3b									Thbs1
Tnfsf11			Socs3									Tmem154
Tnfsf18			Socs5									Tpd52
Tnip1			Sod1									Trim32
Tradd			Spn									Tspo
Trem2			Stat3									Ttf1
Trpv4			Syt11									Ttr
Tslp			Tafa3									Tuba1c
Ttbk1			Tff2									Tyrobp
Vamp8			Tnfaip3									Upp2
Wnt5a			Tnfaip6									Zdhhc21
Zbp1			Tnfaip8l2									Zfas1
Zp3			Tnfrsf1a									Zfp692
			Tnfrsf1b
			Trem2
			Trim45
			Trim65
			Tyro3
			Uaca
			Vps35
			Wfdc1
			Zfp36
AY036118			AY036118			AY036118			AY036118			AY036118			AY036118			AY036118						AY036118			AY036118			AY036118			AY036118
Igfbpl1			Igfbpl1			Igfbpl1			Igfbpl1			Igfbpl1			Igfbpl1			Igfbpl1						Igfbpl1			Igfbpl1			Igfbpl1			Igfbpl1
Spag6			Spag6			Spag6			Spag6			Spag6			Spag6			Spag6			AY036118			Spag6			Spag6			Spag6			Spag6
Mir6236			Mir6236			Mir6236			Mir6236			Mir6236			Mir6236			Mir6236			Igfbpl1			Mir6236			Mir6236			Mir6236			Mir6236
Rn18s-rs5			Rn18s-rs5			Rn18s-rs5			Rn18s-rs5			Rn18s-rs5			Rn18s-rs5			Rn18s-rs5			Spag6			Rn18s-rs5			Rn18s-rs5			Rn18s-rs5			Rn18s-rs5
9630013A20Rik			9630013A20Rik			9630013A20Rik			9630013A20Rik			9630013A20Rik			9630013A20Rik			9630013A20Rik			Mir6236			9630013A20Rik			9630013A20Rik			9630013A20Rik			9630013A20Rik
C4b			C4b			C4b			C4b			C4b			C4b			C4b			Rn18s-rs5			C4b			C4b			C4b			C4b
A530053G22Rik			A530053G22Rik			A530053G22Rik			A530053G22Rik			A530053G22Rik			A530053G22Rik			A530053G22Rik			9630013A20Rik			A530053G22Rik			A530053G22Rik			A530053G22Rik			A530053G22Rik
Top2a			Top2a			Top2a			Top2a			Top2a			Top2a			Top2a			C4b			Top2a			Top2a			Top2a			Top2a
Pcdhga2			Pcdhga2			Pcdhga2			Pcdhga2			Pcdhga2			Pcdhga2			Pcdhga2			A530053G22Rik			Pcdhga2			Pcdhga2			Pcdhga2			Pcdhga2
Mki67			Mki67			Mki67			Mki67			Mki67			Mki67			Mki67			Top2a			Mki67			Mki67			Mki67			Mki67
Sox11			Sox11			Sox11			Sox11			Sox11			Sox11			Sox11			Pcdhga2			Sox11			Sox11			Sox11			Sox11
Pcdhb2			Pcdhb2			Pcdhb2			Pcdhb2			Pcdhb2			Pcdhb2			Pcdhb2			Mki67			Pcdhb2			Pcdhb2			Pcdhb2			Pcdhb2
Draxin			Draxin			Draxin			Draxin			Draxin			Draxin			Draxin			Sox11			Draxin			Draxin			Draxin			Draxin
Rassf10			Rassf10			Rassf10			Rassf10			Rassf10			Rassf10			Rassf10			Pcdhb2			Rassf10			Rassf10			Rassf10			Rassf10
Zc3hav1			Zc3hav1			Zc3hav1			Zc3hav1			Zc3hav1			Zc3hav1			Zc3hav1			Draxin			Zc3hav1			Zc3hav1			Zc3hav1			Zc3hav1
Pcdhb9			Pcdhb9			Pcdhb9			Pcdhb9			Pcdhb9			Pcdhb9			Pcdhb9			Rassf10			Pcdhb9			Pcdhb9			Pcdhb9			Pcdhb9
Cenpf			Cenpf			Cenpf			Cenpf			Cenpf			Cenpf			Cenpf			Zc3hav1			Cenpf			Cenpf			Cenpf			Cenpf
Eomes			Eomes			Eomes			Eomes			Eomes			Eomes			Eomes			Pcdhb9			Eomes			Eomes			Eomes			Eomes
Scn7a			Scn7a			Scn7a			Scn7a			Scn7a			Scn7a			Scn7a			Cenpf			Scn7a			Scn7a			Scn7a			Scn7a
Abca8a			Abca8a			Abca8a			Abca8a			Abca8a			Abca8a			Abca8a			Eomes			Abca8a			Abca8a			Abca8a			Abca8a
9330199G10Rik			9330199G10Rik			9330199G10Rik			9330199G10Rik			9330199G10Rik			9330199G10Rik			9330199G10Rik			Scn7a			9330199G10Rik			9330199G10Rik			9330199G10Rik			9330199G10Rik
Cbx8			Cbx8			Cbx8			Cbx8			Cbx8			Cbx8			Cbx8			Abca8a			Cbx8			Cbx8			Cbx8			Cbx8
H3c2			H3c2			H3c2			H3c2			H3c2			H3c2			H3c2			9330199G10Rik			H3c2			H3c2			H3c2			H3c2
Fmn1			Fmn1			Fmn1			Fmn1			Fmn1			Fmn1			Fmn1			Cbx8			Fmn1			Fmn1			Fmn1			Fmn1
Gm18529			Gm18529			Gm18529			Gm18529			Gm18529			Gm18529			Gm18529			H3c2			Gm18529			Gm18529			Gm18529			Gm18529
Prc1			Prc1			Prc1			Prc1			Prc1			Prc1			Prc1			Fmn1			Prc1			Prc1			Prc1			Prc1
Hgf			Hgf			Hgf			Hgf			Hgf			Hgf			Hgf			Gm18529			Hgf			Hgf			Hgf			Hgf
Gm34567			Gm34567			Gm34567			Gm34567			Gm34567			Gm34567			Gm34567			Prc1			Gm34567			Gm34567			Gm34567			Gm34567
Tnc			Tnc			Tnc			Tnc			Tnc			Tnc			Tnc			Hgf			Tnc			Tnc			Tnc			Tnc
Pcdhb4			Pcdhb4			Pcdhb4			Pcdhb4			Pcdhb4			Pcdhb4			Pcdhb4			Gm34567			Pcdhb4			Pcdhb4			Pcdhb4			Pcdhb4
C3			C3			C3			C3			C3			C3			C3			Tnc			C3			C3			C3			C3
Aspm			Aspm			Aspm			Aspm			Aspm			Aspm			Aspm			Pcdhb4			Aspm			Aspm			Aspm			Aspm
Adamts18			Adamts18			Adamts18			Adamts18			Adamts18			Adamts18			Adamts18			C3			Adamts18			Adamts18			Adamts18			Adamts18
Gm49375			Gm49375			Gm49375			Gm49375			Gm49375			Gm49375			Gm49375			Aspm			Gm49375			Gm49375			Gm49375			Gm49375
Gpr17			Gpr17			Gpr17			Gpr17			Gpr17			Gpr17			Gpr17			Adamts18			Gpr17			Gpr17			Gpr17			Gpr17
Ccnb1			Ccnb1			Ccnb1			Ccnb1			Ccnb1			Ccnb1			Ccnb1			Gm49375			Ccnb1			Ccnb1			Ccnb1			Ccnb1
Lars2			Lars2			Lars2			Lars2			Lars2			Lars2			Lars2			Gpr17			Lars2			Lars2			Lars2			Lars2
Pcdhb8			Pcdhb8			Pcdhb8			Pcdhb8			Pcdhb8			Pcdhb8			Pcdhb8			Ccnb1			Pcdhb8			Pcdhb8			Pcdhb8			Pcdhb8
Sncaip			Sncaip			Sncaip			Sncaip			Sncaip			Sncaip			Sncaip			Lars2			Sncaip			Sncaip			Sncaip			Sncaip
Col1a1			Col1a1			Col1a1			Col1a1			Col1a1			Col1a1			Col1a1			Pcdhb8			Col1a1			Col1a1			Col1a1			Col1a1
Fst			Fst			Fst			Fst			Fst			Fst			Fst			Sncaip			Fst			Fst			Fst			Fst
Ptpro			Ptpro			Ptpro			Ptpro			Ptpro			Ptpro			Ptpro			Col1a1			Ptpro			Ptpro			Ptpro			Ptpro
Cacna2d4			Cacna2d4			Cacna2d4			Cacna2d4			Cacna2d4			Cacna2d4			Cacna2d4			Fst			Cacna2d4			Cacna2d4			Cacna2d4			Cacna2d4
Rad21l			Rad21l			Rad21l			Rad21l			Rad21l			Rad21l			Rad21l			Ptpro			Rad21l			Rad21l			Rad21l			Rad21l
Gm25788			Gm25788			Gm25788			Gm25788			Gm25788			Gm25788			Gm25788			Cacna2d4			Gm25788			Gm25788			Gm25788			Gm25788
7630403G23Rik			7630403G23Rik			7630403G23Rik			7630403G23Rik			7630403G23Rik			7630403G23Rik			7630403G23Rik			Rad21l			7630403G23Rik			7630403G23Rik			7630403G23Rik			7630403G23Rik
Pirt			Pirt			Pirt			Pirt			Pirt			Pirt			Pirt			Gm25788			Pirt			Pirt			Pirt			Pirt
Mpeg1			Mpeg1			Mpeg1			Mpeg1			Mpeg1			Mpeg1			Mpeg1			7630403G23Rik			Mpeg1			Mpeg1			Mpeg1			Mpeg1
Col1a2			Col1a2			Col1a2			Col1a2			Col1a2			Col1a2			Col1a2			Pirt			Col1a2			Col1a2			Col1a2			Col1a2
Gadd45g			Gadd45g			Gadd45g			Gadd45g			Gadd45g			Gadd45g			Gadd45g			Mpeg1			Gadd45g			Gadd45g			Gadd45g			Gadd45g
Lcn2			Lcn2			Lcn2			Lcn2			Lcn2			Lcn2			Lcn2			Col1a2			Lcn2			Lcn2			Lcn2			Lcn2
Pcdhb19			Pcdhb19			Pcdhb19			Pcdhb19			Pcdhb19			Pcdhb19			Pcdhb19			Gadd45g			Pcdhb19			Pcdhb19			Pcdhb19			Pcdhb19
Unc5d			Unc5d			Unc5d			Unc5d			Unc5d			Unc5d			Unc5d			Lcn2			Unc5d			Unc5d			Unc5d			Unc5d
Rpph1			Rpph1			Rpph1			Rpph1			Rpph1			Rpph1			Rpph1			Pcdhb19			Rpph1			Rpph1			Rpph1			Rpph1
Uhrf1			Uhrf1			Uhrf1			Uhrf1			Uhrf1			Uhrf1			Uhrf1			Unc5d			Uhrf1			Uhrf1			Uhrf1			Uhrf1
Rgs16			Rgs16			Rgs16			Rgs16			Rgs16			Rgs16			Rgs16			Rpph1			Rgs16			Rgs16			Rgs16			Rgs16
Gm31698			Gm31698			Gm31698			Gm31698			Gm31698			Gm31698			Gm31698			Uhrf1			Gm31698			Gm31698			Gm31698			Gm31698
Pbk			Pbk			Pbk			Pbk			Pbk			Pbk			Pbk			Rgs16			Pbk			Pbk			Pbk			Pbk
Tead2			Tead2			Tead2			Tead2			Tead2			Tead2			Tead2			Gm31698			Tead2			Tead2			Tead2			Tead2
Zfp57			Zfp57			Zfp57			Zfp57			Zfp57			Zfp57			Zfp57			Pbk			Zfp57			Zfp57			Zfp57			Zfp57
Luzp2			Luzp2			Luzp2			Luzp2			Luzp2			Luzp2			Luzp2			Tead2			Luzp2			Luzp2			Luzp2			Luzp2
Prkcd			Prkcd			Prkcd			Prkcd			Prkcd			Prkcd			Prkcd			Zfp57			Prkcd			Prkcd			Prkcd			Prkcd
Cd209a			Cd209a			Cd209a			Cd209a			Cd209a			Cd209a			Cd209a			Luzp2			Cd209a			Cd209a			Cd209a			Cd209a
ENSMUSG00000095041			ENSMUSG00000095041			ENSMUSG00000095041			ENSMUSG00000095041			ENSMUSG00000095041			ENSMUSG00000095041			ENSMUSG00000095041			Prkcd			ENSMUSG00000095041			ENSMUSG00000095041			ENSMUSG00000095041			ENSMUSG00000095041
4930452G13Rik			4930452G13Rik			4930452G13Rik			4930452G13Rik			4930452G13Rik			4930452G13Rik			4930452G13Rik			Cd209a			4930452G13Rik			4930452G13Rik			4930452G13Rik			4930452G13Rik
Gm25117			Gm25117			Gm25117			Gm25117			Gm25117			Gm25117			Gm25117			ENSMUSG00000095041			Gm25117			Gm25117			Gm25117			Gm25117
Gnasas1			Gnasas1			Gnasas1			Gnasas1			Gnasas1			Gnasas1			Gnasas1			4930452G13Rik			Gnasas1			Gnasas1			Gnasas1			Gnasas1
Pcdhb1			Pcdhb1			Pcdhb1			Pcdhb1			Pcdhb1			Pcdhb1			Pcdhb1			Gm25117			Pcdhb1			Pcdhb1			Pcdhb1			Pcdhb1
Tpbg			Tpbg			Tpbg			Tpbg			Tpbg			Tpbg			Tpbg			Gnasas1			Tpbg			Tpbg			Tpbg			Tpbg
7SK			7SK			7SK			7SK			7SK			7SK			7SK			Pcdhb1			7SK			7SK			7SK			7SK
Adamts15			Adamts15			Adamts15			Adamts15			Adamts15			Adamts15			Adamts15			Tpbg			Adamts15			Adamts15			Adamts15			Adamts15
Ramp3			Ramp3			Ramp3			Ramp3			Ramp3			Ramp3			Ramp3			7SK			Ramp3			Ramp3			Ramp3			Ramp3
Gm42756			Gm42756			Gm42756			Gm42756			Gm42756			Gm42756			Gm42756			Adamts15			Gm42756			Gm42756			Gm42756			Gm42756
																					Ramp3
																					Gm42756

## Sheet: HIP YvO
Positive regulation of inflammatory response	17		Negative regulation of inflammatory response	11		Interferon-mediated signalling	9		Interleukin-mediated signalling	5		DAMs 2021	26		Microglial Exhaustion	6		Inflammasomes	4		cGAS-STING	1		Tfam-/-	23		LINE1 Derepression	9		TE Regulation	1		H3K9me3 proteome
Abcc1	C3		Abr	Cd44		Adar	Ifih1		Akt1	Fcer1g		4632427E13Rik	Adarb1		Ager	Clec7a		Aim2	Casp1		Akt1	Ifi204		Abi3bp	Bst2		Bst2	Bst2		Actb	Uhrf1		BCLAF1
Adam8	Casp1		Acod1	Cst7		Arg1	Igtp		C1qtnf4	Il33		9130401M01Rik	Atf3		Anxa1	Cxcl10		Casp1	Naip2		Aurkb			Agrn	Cxcl10		Cxcl10	Cxcl10		Actl6a			CHTOP
Adora2b	Ccl3		Acp5	Fcgr2b		Cactin	Irf7		Casp4	Oas2		Acaca	Capg		Bcl6	Havcr2		Casp4	Naip5		Banf1			Apol9b	Dtx3l		Ifi204	Ifi204		Actl6b			Crebrf
Adora3	Ctss		Ada	Gpr17		Cdc37	Irgm1		Cd300lf	Oasl2		Ache	Ccl3		Ccl2	Il33		Ddx3x	Pycard		Cdk1			Bst2	Gbp3		Ifi27	Ifi27		Ago2			CBX1
Aim2	Fcer1g		Adcyap1	Hgf		Cnot7	Mmp12		Cd4	Parp14		Adarb1	Ccl6		Ccr2	Lag3		Dhx33			Cgas			Ccl2	H2-Q4		Ifi30	Ifih1		Alkbh5			CBX3
Alox5ap	Fcgr1		Adipoq	Igtp		Dcst1	Nlrc5		Cebpa			Adck5	Cd22		Ccr5	Spp1		Gsdmd			Ifi204			Cmpk2	Ifih1		Ifih1	Ifit1		Arid1a			CBX5
Aoc3	Fcgr3		Adora1	Il33		Dnaja3	Oas1a		Csf2rb			Ank	Cd52		Cd244a			Il18			Irf3			Cxcl10	Ifit1		Ifit1	Ifit3		Arid1b			CCDC137
App	H2-D1		Adora2a	Irgm1		Eif4e2	Oas2		Csf2rb2			Ankrd16	Clec7a		Cd274			Il1b			Irf9			Dhx58	Ifit3		Ifit2	Mx1		Arid2			CCDC59
Btk	H2-K1		Ahr	Pbk		Fadd	Parp14		Ctr9			Apbb2	Cst7		Cd38			Naip1			Lyplal1			Dtx3l	Ifit3b		Ifit3	Oas2		Atf7ip			CCDC86
C2cd4a	H2-Q4		Alox5	Ptpn6		Gigyf2			Cxcr2			Aplp2	Ctsz		Cd72			Naip2			Map3k7			Enpep	Igtp		Ifitm1			Atrx			CEBPZ
C2cd4b	H2-Q6		Aoah	Trem2		Hdac4			Cyld			Apoe	Cxcl16		Cd74			Naip5			Nfkb1			Enpp2	Irf7		Ifitm3			Bap1			CHAF1A
C3	Il33		Apoa1			Hpx			Egr1			Aprt	Cybb		Cd86			Naip6			Parp1			Gbp2	Irgm1		Ifna1			Bcl7a			YBX3
Camk2n1	Pycard		Apoe			Ifih1			Fcer1g			Arap2	Ftl1		Clec7a			Nlrc4			Ppp6c			Gbp3	Lgals3bp		Ifna2			Bcl7b			CUX1
Casp1	Serpine1		Arnt			Ifitm1			Fer			Arrdc4	Gpnmb		Csf1			Nlrp1a			Prkdc			Gbp7	Oas1a		Ifne			Bcl7c			DDX17
Casp4	Tlr2		Ash1l			Ifitm2			Gab1			Asb10	H2-D1		Cxcl10			Nlrp1b			Sting1			H2-Q4	Oasl2		Irf5			Bicra			DDX5
Ccl1	Tlr4		Bcr			Ifitm3			Gfi1			Atf3	H2-K1		Entpd1			Nlrp3			Tab1			Helz2	Parp14		Isg15			Bicral			EBNA1BP2
Ccl3	Trem2		C1qtnf3			Ifitm6			Ikbkb			Atp11c	Ifi204		Havcr2			Nlrp6			Tbk1			Ifi35	Psmb8		Jak1			Brd4			ERH
Ccl5			C1qtnf12			Ifitm7			Ikbke			Atp6v0c	Ifi27l2a		Icos			Pycard			Zbp1			Ifi44	Rnf213		Mal			Brd7			EXOSC10
Ccl24			Ccn3			Ifna1			Il11			Atp6v0c-ps2	Ifit1		Il2rb						Zdhhc18			Ifih1	Rtp4		Mx1			Brd9			FUS
Ccn4			Cd24a			Ifnar1			Il11ra1			Axl	Itgax		Il33						Zdhhc9			Ifit1	Trim30a		Mx2			Cbx1			FYTTD1
Ccr2			Cd44			Ifnar2			Il11ra2			Baiap2l2	Lgals3bp		Il7r									Ifit3	Trim30d		Oas2			Cbx3			GATAD2A
Ccr5			Cd200			Ifnb1						Bcl2a1b	Lyz2		Kit									Ifit3b	Usp18		Rigi			Cbx5			GATAD2B
Ccr7			Cd200l1			Ifng			Il12a			Birc5	Nlrc5		Klf4									Igtp	Xaf1		Stat1			Cdk2ap1			Nop53
Cd24a			Cd200l2			Ifngr1			Il12b			Bola2	Slamf9		Lag3									Iigp1			Stat3			Cdk2ap2			HDLBP
Cd28			Cd200r1			Ifngr2			Il12rb1			Cadm1	Spp1		Ly96									Irf7			Tnfsf10			Chaf1a			HMGA1
Cd47			Cd276			Igtp			Il12rb2			Capg	Tyrobp		Myd88									Irf9						Chaf1b			HNRNPA2B1
Cd81			Cdh5			Ikbke			Il15			Ccdc88a			Nfkb1									Irgm1						Chd3			HNRNPK
Cebpa			Chrna7			Irak1			Il15ra			Ccl3			P2rx7									Irgm2						Chd4			HNRNPL
Cebpb			Cst7			Irf1			Il17a			Ccl4			Pdcd1									Isg15						Chd5			HP1BP3
Clock			Ctla2a			Irf3			Il17f			Ccl6			Prickle1									Lgals3bp						Ctcf			KHDRBS1
Cnr1			Cx3cr1			Irf7			Il17ra			Cd22			S100a8									Mx2						Daxx			KHDRBS3
Csf1r			Cxcl17			Irgm1			Il17rc			Cd34			Satb1									Oas1a						Ddx4			LLPH
Ctsc			Cyld			Irgm2			Il18			Cd52			Sirpa									Oasl2						Dgcr8			LOXL1
Ctss			Cyp19a1			Isg15			Il18r1			Cd63			Socs3									Parp10						Dhx9			LOXL2
Ddt			Dusp10			Jak1			Il18rap			Cd74			Spp1									Parp14						Dicer1			LTBP2
Dhx9			Elf4			Jak2			Il1a			Cd83			Stat1									Parp9						Dnmt1			MATR3
Ets1			Enpp3			Lsm14a			Il1b			Cd9			Tcf7									Psmb8						Dnmt3a			MBD3
Fabp4			Ets1			Mavs			Il1r1			Cdc42ep3			Ticam1									Rigi						Dnmt3b			MBNL1
Fcer1a			Extl3			Med1			Il1r2			Cdca8			Ticam2									Rnf213						Dnmt3c			MPHOSPH10
Fcer1g			Fcgr2b			Mettl3			Il1rap			Ch25h			Tirap									Rtp4						Dnmt3l			MRTO4
Fcgr1			Fem1a			Mmp12			Il1rl1			Chst1												Sim2						Dpf1			MYBBP1A
Fcgr3			Fem1al			Mul1			Il1rn			Clec7a												Slfn2						Dpf2			MYEF2
Fem1a			Ffar4			Myd88			Il2			Cops9												Stat1						Dpf3			NCOA5
Ffar2			Fndc4			Nlrc5			Il2ra			Cox6a2												Stat2						Drosha			NCOA7
Ffar3			Foxf1			Oas1a			Il2rb			Cox6c												Tgtp1						Ehmt1			NONO
Gpr4			Foxp3			Oas1b			Il2rg			Cpd												Trim30a						Ehmt2			PES1
Gprc5b			Fpr2			Oas1c			Il3			Crip1												Trim30d						Elp3			PHB
Gpsm3			Fpr3			Oas1d			Il33			Crlf2												Usp18						Fto			PIAS2
Grn			Fpr-rs3			Oas1e			Il34			Csf1												Xaf1						Gatad2a			POLDIP3
Gsdmd			Fpr-rs4			Oas1f			Il3ra			Csf2ra												Zbp1						Gatad2b			PPAN
H2-D1			Fpr-rs6			Oas1g			Il4			Cst7																		Gtsf1			PPHLN1
H2-K1			Fpr-rs7			Oas1h			Il4ra			Ctsb																		H3f3a			PRDM15
H2-M1			Fxr1			Oas2			Il5			Ctsz																		H3f3b			PRMT1
H2-M2			Gata3			Oas3			Il5ra			Cxcl16																		H3f3c			PRRX2
H2-M5			Ghrl			Otop1			Il6			Cybb																		Hdac1			PTBP1
H2-M9			Ghsr			Parp9			Il6ra			Dhcr7																		Hdac2			QKI
H2-M10.1			Git1			Parp14			Il6st			Dhx32																		Hinfp			RBM12B1
H2-M10.2			Gper1			Pparg			Il9r			Dnajc15																		Kmt5b			RBM15
H2-M10.3			Gpr17			Ptpn2			Irak1			Dpcd																		Kmt5c			RBM26
H2-M10.4			Gpr31b			Rbm47			Irak2			Dpp7																		Lig1			RBM6
H2-M10.5			Gps2			Rfpl4b			Irak3			Dusp3																		Mbd2			RBMX
H2-M10.6			Gpx1			Rnf185			Irak4			Echs1																		Mbd3			RBMXL1
H2-M11			Gpx2			Samhd1			Jak1			Egr2																		Mbd5			RELA
H2-Q1			Grn			Sin3a			Jak2			Ell2																		Mbd6			RIF1
H2-Q2			Gstp1			Smim30			Jak3			Enpp1																		Mettl14			RPF1
H2-Q4			Hamp			Stat1			Lyn			Enpp2																		Mettl16			RPF2
H2-Q6			Hgf			Stat2			Map3k7			Ero1b																		Mettl3			RPS19BP1
H2-Q7			Ier3			Sting1			Mapk3			Etl4																		Morc1			SAFB
H2-Q10			Igf1			Tbk1			Mir301			Fam20c																		Morc2a			SAFB2
H2-T3			Igtp			Trex1			Myd88			Fcgr4																		Morc2b			SETDB1
H2-T9			Il2			Trim6			Nfkbia			Fgl2																		Morc3			SFPQ
H2-T10			Il2ra			Trim41			Nlrp6			Frrs1																		Mov10l1			TRA2B
H2-T22			Il4			Trim56			Notch1			Fth1																		Mphosph8			SLTM
H2-T23			Il10			Trim65			Oas2			Ftl1																		Mta1			SUMO2
Hyal2			Il10ra			Trp53			Oasl1			Fxyd5																		Mta2			SUV39H1
Ido1			Il12b			Ttll12			Oasl2			Fxyd6																		Mta3			SUV39H2
Ifi35			Il13			Txk			Otud4			Gfus																		Mtr4			SUZ12
Ifng			Il17a			Tyk2			Parp14			Glipr1																		Nsun2			TAF15
Ighg1			Il20rb			Ube2k			Pdgfb			Gm15772																		Ogt			TARDBP
Ighg2b			Il22			Usp27x			Pik3r1			Gnas																		Pabpn1			TCF25
Il1b			Il22ra1			Usp29			Plcb1			Gng12																		Pbrm1			THRAP3
Il1rl1			Il22ra2			Wnt5a			Ptpn2			Got1																		Phf10			TRA2A
Il6			Il33			Ythdf2			Rela			Gpnmb																		Piwil1			TRIM28
Il16			Ins1			Ythdf3			Ripk1			Gpr65																		Piwil2			UBE2I
Il17ra			Ins2			Zbp1			Rps6ka4			Gusb																		Piwil4			UTP3
Il17rb			Irgm1						Rps6ka5			H2-D1																		Pld6			WDR46
Il18			Irgm2						Smad4			H2-K1																		Pphln1			XRN2
Il33			Isl1						Spi1			H2-Q7																		Pspc1			YBX1
Kars1			Krt1						Src			Hif1a																		Rbbp4			YLPM1
Kcnn4			Ldlr						Srsf1			Ifi204																		Rbbp7			YTHDC1
Lbp			Lgals9						St18			Ifi27l2a																		Rbm26			YY2
Ldlr			Lpcat3						Stat1			Ifi27l2b																		Rbm27			ZC3H13
Lgals1			Lrfn5						Stat3			Ifit1																		Rbm7			Zfp207
Lgals2			Macir						Stat4			Ifit2																		Safb			Zfp326
Lilra5			Mdk						Stat5a			Igf1																		Safb2			Zfp438
Lpl			Mefv						Stat6			Il1b																		Setdb1			Zfp512
Lrrk2			Metrnl						Syk			Ildr2																		Setdb2			Zfp598
Lta			Mfhas1						Ticam2			Itgax																		Sin3a			Zfp622
Mdk			Mir147						Tirap			Kcnj2																		Sinhcaf			Zfp638
Mefv			Mir7578						Tnip2			Lgals3bp																		Sirt1
Mmp8			Mkrn2						Tollip			Lgi2																		Sirt6
Napepld			Muc19						Traf2			Lmbrd2																		Sltm
Nfkbia			Mvk						Traf3ip2			Lpl																		Smarca2
Nfkbiz			Ndfip1						Traf5			Lyz2																		Smarca4
Ninj1			Nfkb1						Traf6			Lyzl4																		Smarcb1
Nkg7			Nlrc3						Trim32			Mamdc2																		Smarcc1
Nlrp1a			Nlrp3						Tut4			Mblac2																		Smarcc2
Nlrp1b			Nlrp6						Tyk2			Mif																		Smarcd1
Nlrp3			Nlrp12						Usp25			Mir682																		Smarcd2
Nlrp6			Nlrx1						Vrk2			Mrpl27																		Smarcd3
Nlrp10			Nod2						Yap1			Mt1																		Smarce1
Nmi			Npy						Zbp1			Myo1e																		Spen
Nppa			Npy5r									Naglu																		Spocd1
Npy5r			Nr1d1									Nat8l																		Ss18
Nupr1			Nr1d2									Ncbp2as2																		Ss18l1
Osm			Nr1h3									Nceh1																		Ss18l2
Park7			Nr1h4									Ndufv3																		Sumo2
Pdcd4			Nr1h5									Nlrc5																		Suv39h1
Pde2a			Nt5e									Npc2																		Suv39h2
Pde5a			Otulin									Pkib																		Tarbp2
Pik3cg			Pbk									Pld3																		Tasor
Pla2g3			Pdcd10									Pogk																		Tasor2
Plcg2			Pf4									Psat1																		Tet1
Prkca			Pglyrp1									Pycrl																		Tet2
Ptger3			Pla2g5									Ramp1																		Tex15
Ptger4			Pla2g10									Rap2b																		Tnrc18
Ptgs2			Ppara									Rpl23																		Trim28
Pycard			Ppard									Rps18																		Uhrf1
Ripk1			Pparg									Rras																		Uhrf2
Rps19			Proc									S1pr1																		Wiz
S100a8			Psma1									Scd2																		Wtap
S100a9			Psmb4									Scpep1																		Ytdc1
Serpine1			Ptger4									Sdc3																		Ytdc2
Setd4			Ptgis									Serpine2																		Ytdfh2
Snca			Ptpn2									Slamf9																		Ytdhf3
Snx4			Ptpn6									Slc1a2																		Ythdf1
Stap1			Rabgef1									Slc23a2																		Yy1
Stat5a			Rb1									Slc44a1																		Zc3h13
Stat5b			Reg3g									Speg																		Zc3h3
Sucnr1			Rora									Spp1																		Zcchc8
Tac1			Rps19									Srebf2																		Zfc3h1
Tafa3			Selenos									Ssh1
Tgfb1			Sharpin									Ssr4
Tlr2			Siglece									St14
Tlr4			Siglecg									St8sia6
Tlr6			Sirpa									Stim2
Tnf			Slamf8									Sulf2
Tnfrsf1a			Slc39a8									Syngr1
Tnfrsf11a			Smad3									Tbcd
Tnfsf4			Smpdl3b									Thbs1
Tnfsf11			Socs3									Tmem154
Tnfsf18			Socs5									Tpd52
Tnip1			Sod1									Trim32
Tradd			Spn									Tspo
Trem2			Stat3									Ttf1
Trpv4			Syt11									Ttr
Tslp			Tafa3									Tuba1c
Ttbk1			Tff2									Tyrobp
Vamp8			Tnfaip3									Upp2
Wnt5a			Tnfaip6									Zdhhc21
Zbp1			Tnfaip8l2									Zfas1
Zp3			Tnfrsf1a									Zfp692
			Tnfrsf1b
			Trem2
			Trim45
			Trim65
			Tyro3
			Uaca
			Vps35
			Wfdc1
			Zfp36
C4b			C4b			C4b			C4b			C4b			C4b			C4b						C4b			C4b			C4b			C4b
AY036118			AY036118			AY036118			AY036118			AY036118			AY036118			AY036118						AY036118			AY036118			AY036118			AY036118
Spag6			Spag6			Spag6			Spag6			Spag6			Spag6			Spag6			C4b			Spag6			Spag6			Spag6			Spag6
Clec7a			Clec7a			Clec7a			Clec7a			Clec7a			Clec7a			Clec7a			AY036118			Clec7a			Clec7a			Clec7a			Clec7a
Gfap			Gfap			Gfap			Gfap			Gfap			Gfap			Gfap			Spag6			Gfap			Gfap			Gfap			Gfap
Ide			Ide			Ide			Ide			Ide			Ide			Ide			Clec7a			Ide			Ide			Ide			Ide
Rn18s-rs5			Rn18s-rs5			Rn18s-rs5			Rn18s-rs5			Rn18s-rs5			Rn18s-rs5			Rn18s-rs5			Gfap			Rn18s-rs5			Rn18s-rs5			Rn18s-rs5			Rn18s-rs5
Igfbpl1			Igfbpl1			Igfbpl1			Igfbpl1			Igfbpl1			Igfbpl1			Igfbpl1			Ide			Igfbpl1			Igfbpl1			Igfbpl1			Igfbpl1
Itgax			Itgax			Itgax			Itgax			Itgax			Itgax			Itgax			Rn18s-rs5			Itgax			Itgax			Itgax			Itgax
Mpeg1			Mpeg1			Mpeg1			Mpeg1			Mpeg1			Mpeg1			Mpeg1			Igfbpl1			Mpeg1			Mpeg1			Mpeg1			Mpeg1
A530053G22Rik			A530053G22Rik			A530053G22Rik			A530053G22Rik			A530053G22Rik			A530053G22Rik			A530053G22Rik			Itgax			A530053G22Rik			A530053G22Rik			A530053G22Rik			A530053G22Rik
Cst7			Cst7			Cst7			Cst7			Cst7			Cst7			Cst7			Mpeg1			Cst7			Cst7			Cst7			Cst7
C3			C3			C3			C3			C3			C3			C3			A530053G22Rik			C3			C3			C3			C3
Ly9			Ly9			Ly9			Ly9			Ly9			Ly9			Ly9			Cst7			Ly9			Ly9			Ly9			Ly9
Mir6236			Mir6236			Mir6236			Mir6236			Mir6236			Mir6236			Mir6236			C3			Mir6236			Mir6236			Mir6236			Mir6236
Pcdhb9			Pcdhb9			Pcdhb9			Pcdhb9			Pcdhb9			Pcdhb9			Pcdhb9			Ly9			Pcdhb9			Pcdhb9			Pcdhb9			Pcdhb9
Zc3hav1			Zc3hav1			Zc3hav1			Zc3hav1			Zc3hav1			Zc3hav1			Zc3hav1			Mir6236			Zc3hav1			Zc3hav1			Zc3hav1			Zc3hav1
Ggta1			Ggta1			Ggta1			Ggta1			Ggta1			Ggta1			Ggta1			Pcdhb9			Ggta1			Ggta1			Ggta1			Ggta1
AA414992			AA414992			AA414992			AA414992			AA414992			AA414992			AA414992			Zc3hav1			AA414992			AA414992			AA414992			AA414992
Aspg			Aspg			Aspg			Aspg			Aspg			Aspg			Aspg			Ggta1			Aspg			Aspg			Aspg			Aspg
9630013A20Rik			9630013A20Rik			9630013A20Rik			9630013A20Rik			9630013A20Rik			9630013A20Rik			9630013A20Rik			AA414992			9630013A20Rik			9630013A20Rik			9630013A20Rik			9630013A20Rik
Gpnmb			Gpnmb			Gpnmb			Gpnmb			Gpnmb			Gpnmb			Gpnmb			Aspg			Gpnmb			Gpnmb			Gpnmb			Gpnmb
Lyz2			Lyz2			Lyz2			Lyz2			Lyz2			Lyz2			Lyz2			9630013A20Rik			Lyz2			Lyz2			Lyz2			Lyz2
Mki67			Mki67			Mki67			Mki67			Mki67			Mki67			Mki67			Gpnmb			Mki67			Mki67			Mki67			Mki67
Cd22			Cd22			Cd22			Cd22			Cd22			Cd22			Cd22			Lyz2			Cd22			Cd22			Cd22			Cd22
Ctss			Ctss			Ctss			Ctss			Ctss			Ctss			Ctss			Mki67			Ctss			Ctss			Ctss			Ctss
Trim30d			Trim30d			Trim30d			Trim30d			Trim30d			Trim30d			Trim30d			Cd22			Trim30d			Trim30d			Trim30d			Trim30d
Mmp12			Mmp12			Mmp12			Mmp12			Mmp12			Mmp12			Mmp12			Ctss			Mmp12			Mmp12			Mmp12			Mmp12
Tlr2			Tlr2			Tlr2			Tlr2			Tlr2			Tlr2			Tlr2			Trim30d			Tlr2			Tlr2			Tlr2			Tlr2
ENSMUSG00000095041			ENSMUSG00000095041			ENSMUSG00000095041			ENSMUSG00000095041			ENSMUSG00000095041			ENSMUSG00000095041			ENSMUSG00000095041			Mmp12			ENSMUSG00000095041			ENSMUSG00000095041			ENSMUSG00000095041			ENSMUSG00000095041
Pcdhb2			Pcdhb2			Pcdhb2			Pcdhb2			Pcdhb2			Pcdhb2			Pcdhb2			Tlr2			Pcdhb2			Pcdhb2			Pcdhb2			Pcdhb2
Psmb8			Psmb8			Psmb8			Psmb8			Psmb8			Psmb8			Psmb8			ENSMUSG00000095041			Psmb8			Psmb8			Psmb8			Psmb8
Tgm1			Tgm1			Tgm1			Tgm1			Tgm1			Tgm1			Tgm1			Pcdhb2			Tgm1			Tgm1			Tgm1			Tgm1
Cenpf			Cenpf			Cenpf			Cenpf			Cenpf			Cenpf			Cenpf			Psmb8			Cenpf			Cenpf			Cenpf			Cenpf
Gm16505			Gm16505			Gm16505			Gm16505			Gm16505			Gm16505			Gm16505			Tgm1			Gm16505			Gm16505			Gm16505			Gm16505
Tmc3			Tmc3			Tmc3			Tmc3			Tmc3			Tmc3			Tmc3			Cenpf			Tmc3			Tmc3			Tmc3			Tmc3
Cd84			Cd84			Cd84			Cd84			Cd84			Cd84			Cd84			Gm16505			Cd84			Cd84			Cd84			Cd84
Ifit3b			Ifit3b			Ifit3b			Ifit3b			Ifit3b			Ifit3b			Ifit3b			Tmc3			Ifit3b			Ifit3b			Ifit3b			Ifit3b
Fgfbp3			Fgfbp3			Fgfbp3			Fgfbp3			Fgfbp3			Fgfbp3			Fgfbp3			Cd84			Fgfbp3			Fgfbp3			Fgfbp3			Fgfbp3
Abca8a			Abca8a			Abca8a			Abca8a			Abca8a			Abca8a			Abca8a			Ifit3b			Abca8a			Abca8a			Abca8a			Abca8a
Trim30a			Trim30a			Trim30a			Trim30a			Trim30a			Trim30a			Trim30a			Fgfbp3			Trim30a			Trim30a			Trim30a			Trim30a
Cd48			Cd48			Cd48			Cd48			Cd48			Cd48			Cd48			Abca8a			Cd48			Cd48			Cd48			Cd48
Irgm1			Irgm1			Irgm1			Irgm1			Irgm1			Irgm1			Irgm1			Trim30a			Irgm1			Irgm1			Irgm1			Irgm1
Trem2			Trem2			Trem2			Trem2			Trem2			Trem2			Trem2			Cd48			Trem2			Trem2			Trem2			Trem2
Btaf1			Btaf1			Btaf1			Btaf1			Btaf1			Btaf1			Btaf1			Irgm1			Btaf1			Btaf1			Btaf1			Btaf1
Ifit3			Ifit3			Ifit3			Ifit3			Ifit3			Ifit3			Ifit3			Trem2			Ifit3			Ifit3			Ifit3			Ifit3
Gm4951			Gm4951			Gm4951			Gm4951			Gm4951			Gm4951			Gm4951			Btaf1			Gm4951			Gm4951			Gm4951			Gm4951
Upk1b			Upk1b			Upk1b			Upk1b			Upk1b			Upk1b			Upk1b			Ifit3			Upk1b			Upk1b			Upk1b			Upk1b
H2-D1			H2-D1			H2-D1			H2-D1			H2-D1			H2-D1			H2-D1			Gm4951			H2-D1			H2-D1			H2-D1			H2-D1
C1qc			C1qc			C1qc			C1qc			C1qc			C1qc			C1qc			Upk1b			C1qc			C1qc			C1qc			C1qc
Tyrobp			Tyrobp			Tyrobp			Tyrobp			Tyrobp			Tyrobp			Tyrobp			H2-D1			Tyrobp			Tyrobp			Tyrobp			Tyrobp
Adgre1			Adgre1			Adgre1			Adgre1			Adgre1			Adgre1			Adgre1			C1qc			Adgre1			Adgre1			Adgre1			Adgre1
Prc1			Prc1			Prc1			Prc1			Prc1			Prc1			Prc1			Tyrobp			Prc1			Prc1			Prc1			Prc1
Pcdhb4			Pcdhb4			Pcdhb4			Pcdhb4			Pcdhb4			Pcdhb4			Pcdhb4			Adgre1			Pcdhb4			Pcdhb4			Pcdhb4			Pcdhb4
C3ar1			C3ar1			C3ar1			C3ar1			C3ar1			C3ar1			C3ar1			Prc1			C3ar1			C3ar1			C3ar1			C3ar1
Cybb			Cybb			Cybb			Cybb			Cybb			Cybb			Cybb			Pcdhb4			Cybb			Cybb			Cybb			Cybb
Top2a			Top2a			Top2a			Top2a			Top2a			Top2a			Top2a			C3ar1			Top2a			Top2a			Top2a			Top2a
Ifi204			Ifi204			Ifi204			Ifi204			Ifi204			Ifi204			Ifi204			Cybb			Ifi204			Ifi204			Ifi204			Ifi204
Txlnb			Txlnb			Txlnb			Txlnb			Txlnb			Txlnb			Txlnb			Top2a			Txlnb			Txlnb			Txlnb			Txlnb
S100a6			S100a6			S100a6			S100a6			S100a6			S100a6			S100a6			Ifi204			S100a6			S100a6			S100a6			S100a6
Pcdhb14			Pcdhb14			Pcdhb14			Pcdhb14			Pcdhb14			Pcdhb14			Pcdhb14			Txlnb			Pcdhb14			Pcdhb14			Pcdhb14			Pcdhb14
Cd68			Cd68			Cd68			Cd68			Cd68			Cd68			Cd68			S100a6			Cd68			Cd68			Cd68			Cd68
Trdn			Trdn			Trdn			Trdn			Trdn			Trdn			Trdn			Pcdhb14			Trdn			Trdn			Trdn			Trdn
Naip2			Naip2			Naip2			Naip2			Naip2			Naip2			Naip2			Cd68			Naip2			Naip2			Naip2			Naip2
Dock2			Dock2			Dock2			Dock2			Dock2			Dock2			Dock2			Trdn			Dock2			Dock2			Dock2			Dock2
3222401L13Rik			3222401L13Rik			3222401L13Rik			3222401L13Rik			3222401L13Rik			3222401L13Rik			3222401L13Rik			Naip2			3222401L13Rik			3222401L13Rik			3222401L13Rik			3222401L13Rik
Cd52			Cd52			Cd52			Cd52			Cd52			Cd52			Cd52			Dock2			Cd52			Cd52			Cd52			Cd52
Eya4			Eya4			Eya4			Eya4			Eya4			Eya4			Eya4			3222401L13Rik			Eya4			Eya4			Eya4			Eya4
Vim			Vim			Vim			Vim			Vim			Vim			Vim			Cd52			Vim			Vim			Vim			Vim
Aldh1l2			Aldh1l2			Aldh1l2			Aldh1l2			Aldh1l2			Aldh1l2			Aldh1l2			Eya4			Aldh1l2			Aldh1l2			Aldh1l2			Aldh1l2
Gm18529			Gm18529			Gm18529			Gm18529			Gm18529			Gm18529			Gm18529			Vim			Gm18529			Gm18529			Gm18529			Gm18529
Hvcn1			Hvcn1			Hvcn1			Hvcn1			Hvcn1			Hvcn1			Hvcn1			Aldh1l2			Hvcn1			Hvcn1			Hvcn1			Hvcn1
Timp1			Timp1			Timp1			Timp1			Timp1			Timp1			Timp1			Gm18529			Timp1			Timp1			Timp1			Timp1
Cd44			Cd44			Cd44			Cd44			Cd44			Cd44			Cd44			Hvcn1			Cd44			Cd44			Cd44			Cd44
Capg			Capg			Capg			Capg			Capg			Capg			Capg			Timp1			Capg			Capg			Capg			Capg
Apod			Apod			Apod			Apod			Apod			Apod			Apod			Cd44			Apod			Apod			Apod			Apod
Serpina3n			Serpina3n			Serpina3n			Serpina3n			Serpina3n			Serpina3n			Serpina3n			Capg			Serpina3n			Serpina3n			Serpina3n			Serpina3n
Plek			Plek			Plek			Plek			Plek			Plek			Plek			Apod			Plek			Plek			Plek			Plek
AU020206			AU020206			AU020206			AU020206			AU020206			AU020206			AU020206			Serpina3n			AU020206			AU020206			AU020206			AU020206
Pcdhb13			Pcdhb13			Pcdhb13			Pcdhb13			Pcdhb13			Pcdhb13			Pcdhb13			Plek			Pcdhb13			Pcdhb13			Pcdhb13			Pcdhb13
Ddx60			Ddx60			Ddx60			Ddx60			Ddx60			Ddx60			Ddx60			AU020206			Ddx60			Ddx60			Ddx60			Ddx60
B2m			B2m			B2m			B2m			B2m			B2m			B2m			Pcdhb13			B2m			B2m			B2m			B2m
Lilrb4a			Lilrb4a			Lilrb4a			Lilrb4a			Lilrb4a			Lilrb4a			Lilrb4a			Ddx60			Lilrb4a			Lilrb4a			Lilrb4a			Lilrb4a
C1qa			C1qa			C1qa			C1qa			C1qa			C1qa			C1qa			B2m			C1qa			C1qa			C1qa			C1qa
Pcdhb6			Pcdhb6			Pcdhb6			Pcdhb6			Pcdhb6			Pcdhb6			Pcdhb6			Lilrb4a			Pcdhb6			Pcdhb6			Pcdhb6			Pcdhb6
Flnc			Flnc			Flnc			Flnc			Flnc			Flnc			Flnc			C1qa			Flnc			Flnc			Flnc			Flnc
Draxin			Draxin			Draxin			Draxin			Draxin			Draxin			Draxin			Pcdhb6			Draxin			Draxin			Draxin			Draxin
H2-K1			H2-K1			H2-K1			H2-K1			H2-K1			H2-K1			H2-K1			Flnc			H2-K1			H2-K1			H2-K1			H2-K1
Eomes			Eomes			Eomes			Eomes			Eomes			Eomes			Eomes			Draxin			Eomes			Eomes			Eomes			Eomes
Tap1			Tap1			Tap1			Tap1			Tap1			Tap1			Tap1			H2-K1			Tap1			Tap1			Tap1			Tap1
Pld4			Pld4			Pld4			Pld4			Pld4			Pld4			Pld4			Eomes			Pld4			Pld4			Pld4			Pld4
Skap2			Skap2			Skap2			Skap2			Skap2			Skap2			Skap2			Tap1			Skap2			Skap2			Skap2			Skap2
Gm48530			Gm48530			Gm48530			Gm48530			Gm48530			Gm48530			Gm48530			Pld4			Gm48530			Gm48530			Gm48530			Gm48530
Ptprc			Ptprc			Ptprc			Ptprc			Ptprc			Ptprc			Ptprc			Skap2			Ptprc			Ptprc			Ptprc			Ptprc
Ccl6			Ccl6			Ccl6			Ccl6			Ccl6			Ccl6			Ccl6			Gm48530			Ccl6			Ccl6			Ccl6			Ccl6
C1qb			C1qb			C1qb			C1qb			C1qb			C1qb			C1qb			Ptprc			C1qb			C1qb			C1qb			C1qb
Ifit1			Ifit1			Ifit1			Ifit1			Ifit1			Ifit1			Ifit1			Ccl6			Ifit1			Ifit1			Ifit1			Ifit1
Itgb2			Itgb2			Itgb2			Itgb2			Itgb2			Itgb2			Itgb2			C1qb			Itgb2			Itgb2			Itgb2			Itgb2
Cyba			Cyba			Cyba			Cyba			Cyba			Cyba			Cyba			Ifit1			Cyba			Cyba			Cyba			Cyba
Tfcp2l1			Tfcp2l1			Tfcp2l1			Tfcp2l1			Tfcp2l1			Tfcp2l1			Tfcp2l1			Itgb2			Tfcp2l1			Tfcp2l1			Tfcp2l1			Tfcp2l1
Arl11			Arl11			Arl11			Arl11			Arl11			Arl11			Arl11			Cyba			Arl11			Arl11			Arl11			Arl11
Fcer1g			Fcer1g			Fcer1g			Fcer1g			Fcer1g			Fcer1g			Fcer1g			Tfcp2l1			Fcer1g			Fcer1g			Fcer1g			Fcer1g
Cela1			Cela1			Cela1			Cela1			Cela1			Cela1			Cela1			Arl11			Cela1			Cela1			Cela1			Cela1
Tmem176a			Tmem176a			Tmem176a			Tmem176a			Tmem176a			Tmem176a			Tmem176a			Fcer1g			Tmem176a			Tmem176a			Tmem176a			Tmem176a
Fmo2			Fmo2			Fmo2			Fmo2			Fmo2			Fmo2			Fmo2			Cela1			Fmo2			Fmo2			Fmo2			Fmo2
Pcdhb8			Pcdhb8			Pcdhb8			Pcdhb8			Pcdhb8			Pcdhb8			Pcdhb8			Tmem176a			Pcdhb8			Pcdhb8			Pcdhb8			Pcdhb8
Lgals3bp			Lgals3bp			Lgals3bp			Lgals3bp			Lgals3bp			Lgals3bp			Lgals3bp			Fmo2			Lgals3bp			Lgals3bp			Lgals3bp			Lgals3bp
Gvin3			Gvin3			Gvin3			Gvin3			Gvin3			Gvin3			Gvin3			Pcdhb8			Gvin3			Gvin3			Gvin3			Gvin3
Naalad2			Naalad2			Naalad2			Naalad2			Naalad2			Naalad2			Naalad2			Lgals3bp			Naalad2			Naalad2			Naalad2			Naalad2
Scn7a			Scn7a			Scn7a			Scn7a			Scn7a			Scn7a			Scn7a			Gvin3			Scn7a			Scn7a			Scn7a			Scn7a
Vwa5a			Vwa5a			Vwa5a			Vwa5a			Vwa5a			Vwa5a			Vwa5a			Naalad2			Vwa5a			Vwa5a			Vwa5a			Vwa5a
Gpr17			Gpr17			Gpr17			Gpr17			Gpr17			Gpr17			Gpr17			Scn7a			Gpr17			Gpr17			Gpr17			Gpr17
Gm14569			Gm14569			Gm14569			Gm14569			Gm14569			Gm14569			Gm14569			Vwa5a			Gm14569			Gm14569			Gm14569			Gm14569
Fcgr2b			Fcgr2b			Fcgr2b			Fcgr2b			Fcgr2b			Fcgr2b			Fcgr2b			Gpr17			Fcgr2b			Fcgr2b			Fcgr2b			Fcgr2b
Fcgr3			Fcgr3			Fcgr3			Fcgr3			Fcgr3			Fcgr3			Fcgr3			Gm14569			Fcgr3			Fcgr3			Fcgr3			Fcgr3
Casp1			Casp1			Casp1			Casp1			Casp1			Casp1			Casp1			Fcgr2b			Casp1			Casp1			Casp1			Casp1
Lgals3			Lgals3			Lgals3			Lgals3			Lgals3			Lgals3			Lgals3			Fcgr3			Lgals3			Lgals3			Lgals3			Lgals3
Dmp1			Dmp1			Dmp1			Dmp1			Dmp1			Dmp1			Dmp1			Casp1			Dmp1			Dmp1			Dmp1			Dmp1
Nlrc5			Nlrc5			Nlrc5			Nlrc5			Nlrc5			Nlrc5			Nlrc5			Lgals3			Nlrc5			Nlrc5			Nlrc5			Nlrc5
Usp18			Usp18			Usp18			Usp18			Usp18			Usp18			Usp18			Dmp1			Usp18			Usp18			Usp18			Usp18
Cxcl16			Cxcl16			Cxcl16			Cxcl16			Cxcl16			Cxcl16			Cxcl16			Nlrc5			Cxcl16			Cxcl16			Cxcl16			Cxcl16
Oasl2			Oasl2			Oasl2			Oasl2			Oasl2			Oasl2			Oasl2			Usp18			Oasl2			Oasl2			Oasl2			Oasl2
Naip5			Naip5			Naip5			Naip5			Naip5			Naip5			Naip5			Cxcl16			Naip5			Naip5			Naip5			Naip5
Gadl1			Gadl1			Gadl1			Gadl1			Gadl1			Gadl1			Gadl1			Oasl2			Gadl1			Gadl1			Gadl1			Gadl1
Slc11a1			Slc11a1			Slc11a1			Slc11a1			Slc11a1			Slc11a1			Slc11a1			Naip5			Slc11a1			Slc11a1			Slc11a1			Slc11a1
4930452G13Rik			4930452G13Rik			4930452G13Rik			4930452G13Rik			4930452G13Rik			4930452G13Rik			4930452G13Rik			Gadl1			4930452G13Rik			4930452G13Rik			4930452G13Rik			4930452G13Rik
Rtp4			Rtp4			Rtp4			Rtp4			Rtp4			Rtp4			Rtp4			Slc11a1			Rtp4			Rtp4			Rtp4			Rtp4
Pcdhb11			Pcdhb11			Pcdhb11			Pcdhb11			Pcdhb11			Pcdhb11			Pcdhb11			4930452G13Rik			Pcdhb11			Pcdhb11			Pcdhb11			Pcdhb11
Pcdhb12			Pcdhb12			Pcdhb12			Pcdhb12			Pcdhb12			Pcdhb12			Pcdhb12			Rtp4			Pcdhb12			Pcdhb12			Pcdhb12			Pcdhb12
Wdfy4			Wdfy4			Wdfy4			Wdfy4			Wdfy4			Wdfy4			Wdfy4			Pcdhb11			Wdfy4			Wdfy4			Wdfy4			Wdfy4
Ctsz			Ctsz			Ctsz			Ctsz			Ctsz			Ctsz			Ctsz			Pcdhb12			Ctsz			Ctsz			Ctsz			Ctsz
Gvin-ps7			Gvin-ps7			Gvin-ps7			Gvin-ps7			Gvin-ps7			Gvin-ps7			Gvin-ps7			Wdfy4			Gvin-ps7			Gvin-ps7			Gvin-ps7			Gvin-ps7
Lsp1			Lsp1			Lsp1			Lsp1			Lsp1			Lsp1			Lsp1			Ctsz			Lsp1			Lsp1			Lsp1			Lsp1
Xaf1			Xaf1			Xaf1			Xaf1			Xaf1			Xaf1			Xaf1			Gvin-ps7			Xaf1			Xaf1			Xaf1			Xaf1
Tlr13			Tlr13			Tlr13			Tlr13			Tlr13			Tlr13			Tlr13			Lsp1			Tlr13			Tlr13			Tlr13			Tlr13
Ftl1			Ftl1			Ftl1			Ftl1			Ftl1			Ftl1			Ftl1			Xaf1			Ftl1			Ftl1			Ftl1			Ftl1
Rassf10			Rassf10			Rassf10			Rassf10			Rassf10			Rassf10			Rassf10			Tlr13			Rassf10			Rassf10			Rassf10			Rassf10
Slc27a3			Slc27a3			Slc27a3			Slc27a3			Slc27a3			Slc27a3			Slc27a3			Ftl1			Slc27a3			Slc27a3			Slc27a3			Slc27a3
Akr1b8			Akr1b8			Akr1b8			Akr1b8			Akr1b8			Akr1b8			Akr1b8			Rassf10			Akr1b8			Akr1b8			Akr1b8			Akr1b8
Ifi27l2a			Ifi27l2a			Ifi27l2a			Ifi27l2a			Ifi27l2a			Ifi27l2a			Ifi27l2a			Slc27a3			Ifi27l2a			Ifi27l2a			Ifi27l2a			Ifi27l2a
Gpr84			Gpr84			Gpr84			Gpr84			Gpr84			Gpr84			Gpr84			Akr1b8			Gpr84			Gpr84			Gpr84			Gpr84
Gm38340			Gm38340			Gm38340			Gm38340			Gm38340			Gm38340			Gm38340			Ifi27l2a			Gm38340			Gm38340			Gm38340			Gm38340
Igtp			Igtp			Igtp			Igtp			Igtp			Igtp			Igtp			Gpr84			Igtp			Igtp			Igtp			Igtp
Cacna2d4			Cacna2d4			Cacna2d4			Cacna2d4			Cacna2d4			Cacna2d4			Cacna2d4			Gm38340			Cacna2d4			Cacna2d4			Cacna2d4			Cacna2d4
Gbp6			Gbp6			Gbp6			Gbp6			Gbp6			Gbp6			Gbp6			Igtp			Gbp6			Gbp6			Gbp6			Gbp6
Dach2			Dach2			Dach2			Dach2			Dach2			Dach2			Dach2			Cacna2d4			Dach2			Dach2			Dach2			Dach2
Aplnr			Aplnr			Aplnr			Aplnr			Aplnr			Aplnr			Aplnr			Gbp6			Aplnr			Aplnr			Aplnr			Aplnr
Cxcl10			Cxcl10			Cxcl10			Cxcl10			Cxcl10			Cxcl10			Cxcl10			Dach2			Cxcl10			Cxcl10			Cxcl10			Cxcl10
Slamf9			Slamf9			Slamf9			Slamf9			Slamf9			Slamf9			Slamf9			Aplnr			Slamf9			Slamf9			Slamf9			Slamf9
Dpysl3			Dpysl3			Dpysl3			Dpysl3			Dpysl3			Dpysl3			Dpysl3			Cxcl10			Dpysl3			Dpysl3			Dpysl3			Dpysl3
Uhrf1			Uhrf1			Uhrf1			Uhrf1			Uhrf1			Uhrf1			Uhrf1			Slamf9			Uhrf1			Uhrf1			Uhrf1			Uhrf1
Rad21l			Rad21l			Rad21l			Rad21l			Rad21l			Rad21l			Rad21l			Dpysl3			Rad21l			Rad21l			Rad21l			Rad21l
Havcr2			Havcr2			Havcr2			Havcr2			Havcr2			Havcr2			Havcr2			Uhrf1			Havcr2			Havcr2			Havcr2			Havcr2
Tnc			Tnc			Tnc			Tnc			Tnc			Tnc			Tnc			Rad21l			Tnc			Tnc			Tnc			Tnc
Rnf213			Rnf213			Rnf213			Rnf213			Rnf213			Rnf213			Rnf213			Havcr2			Rnf213			Rnf213			Rnf213			Rnf213
Akr1c13			Akr1c13			Akr1c13			Akr1c13			Akr1c13			Akr1c13			Akr1c13			Tnc			Akr1c13			Akr1c13			Akr1c13			Akr1c13
Cyp2e1			Cyp2e1			Cyp2e1			Cyp2e1			Cyp2e1			Cyp2e1			Cyp2e1			Rnf213			Cyp2e1			Cyp2e1			Cyp2e1			Cyp2e1
Phf11d			Phf11d			Phf11d			Phf11d			Phf11d			Phf11d			Phf11d			Akr1c13			Phf11d			Phf11d			Phf11d			Phf11d
Sox11			Sox11			Sox11			Sox11			Sox11			Sox11			Sox11			Cyp2e1			Sox11			Sox11			Sox11			Sox11
Pcdhb1			Pcdhb1			Pcdhb1			Pcdhb1			Pcdhb1			Pcdhb1			Pcdhb1			Phf11d			Pcdhb1			Pcdhb1			Pcdhb1			Pcdhb1
H2-Q6			H2-Q6			H2-Q6			H2-Q6			H2-Q6			H2-Q6			H2-Q6			Sox11			H2-Q6			H2-Q6			H2-Q6			H2-Q6
Ptpro			Ptpro			Ptpro			Ptpro			Ptpro			Ptpro			Ptpro			Pcdhb1			Ptpro			Ptpro			Ptpro			Ptpro
Trim21			Trim21			Trim21			Trim21			Trim21			Trim21			Trim21			H2-Q6			Trim21			Trim21			Trim21			Trim21
Ly86			Ly86			Ly86			Ly86			Ly86			Ly86			Ly86			Ptpro			Ly86			Ly86			Ly86			Ly86
Myo1f			Myo1f			Myo1f			Myo1f			Myo1f			Myo1f			Myo1f			Trim21			Myo1f			Myo1f			Myo1f			Myo1f
Gm3654			Gm3654			Gm3654			Gm3654			Gm3654			Gm3654			Gm3654			Ly86			Gm3654			Gm3654			Gm3654			Gm3654
Treml2			Treml2			Treml2			Treml2			Treml2			Treml2			Treml2			Myo1f			Treml2			Treml2			Treml2			Treml2
Csf3r			Csf3r			Csf3r			Csf3r			Csf3r			Csf3r			Csf3r			Gm3654			Csf3r			Csf3r			Csf3r			Csf3r
H19			H19			H19			H19			H19			H19			H19			Treml2			H19			H19			H19			H19
Pirb			Pirb			Pirb			Pirb			Pirb			Pirb			Pirb			Csf3r			Pirb			Pirb			Pirb			Pirb
Oas2			Oas2			Oas2			Oas2			Oas2			Oas2			Oas2			H19			Oas2			Oas2			Oas2			Oas2
Nlrp5-ps			Nlrp5-ps			Nlrp5-ps			Nlrp5-ps			Nlrp5-ps			Nlrp5-ps			Nlrp5-ps			Pirb			Nlrp5-ps			Nlrp5-ps			Nlrp5-ps			Nlrp5-ps
Ifi209			Ifi209			Ifi209			Ifi209			Ifi209			Ifi209			Ifi209			Oas2			Ifi209			Ifi209			Ifi209			Ifi209
Hgf			Hgf			Hgf			Hgf			Hgf			Hgf			Hgf			Nlrp5-ps			Hgf			Hgf			Hgf			Hgf
Nid1			Nid1			Nid1			Nid1			Nid1			Nid1			Nid1			Ifi209			Nid1			Nid1			Nid1			Nid1
Col1a1			Col1a1			Col1a1			Col1a1			Col1a1			Col1a1			Col1a1			Hgf			Col1a1			Col1a1			Col1a1			Col1a1
Ptgs1			Ptgs1			Ptgs1			Ptgs1			Ptgs1			Ptgs1			Ptgs1			Nid1			Ptgs1			Ptgs1			Ptgs1			Ptgs1
Pbk			Pbk			Pbk			Pbk			Pbk			Pbk			Pbk			Col1a1			Pbk			Pbk			Pbk			Pbk
Pcdhga2			Pcdhga2			Pcdhga2			Pcdhga2			Pcdhga2			Pcdhga2			Pcdhga2			Ptgs1			Pcdhga2			Pcdhga2			Pcdhga2			Pcdhga2
Cd300c2			Cd300c2			Cd300c2			Cd300c2			Cd300c2			Cd300c2			Cd300c2			Pbk			Cd300c2			Cd300c2			Cd300c2			Cd300c2
Tead2			Tead2			Tead2			Tead2			Tead2			Tead2			Tead2			Pcdhga2			Tead2			Tead2			Tead2			Tead2
Col3a1			Col3a1			Col3a1			Col3a1			Col3a1			Col3a1			Col3a1			Cd300c2			Col3a1			Col3a1			Col3a1			Col3a1
A830036E02Rik			A830036E02Rik			A830036E02Rik			A830036E02Rik			A830036E02Rik			A830036E02Rik			A830036E02Rik			Tead2			A830036E02Rik			A830036E02Rik			A830036E02Rik			A830036E02Rik
Pcdhb5			Pcdhb5			Pcdhb5			Pcdhb5			Pcdhb5			Pcdhb5			Pcdhb5			Col3a1			Pcdhb5			Pcdhb5			Pcdhb5			Pcdhb5
Psmb9			Psmb9			Psmb9			Psmb9			Psmb9			Psmb9			Psmb9			A830036E02Rik			Psmb9			Psmb9			Psmb9			Psmb9
Samd9l			Samd9l			Samd9l			Samd9l			Samd9l			Samd9l			Samd9l			Pcdhb5			Samd9l			Samd9l			Samd9l			Samd9l
Ighm			Ighm			Ighm			Ighm			Ighm			Ighm			Ighm			Psmb9			Ighm			Ighm			Ighm			Ighm
Gm49375			Gm49375			Gm49375			Gm49375			Gm49375			Gm49375			Gm49375			Samd9l			Gm49375			Gm49375			Gm49375			Gm49375
Serpinf2			Serpinf2			Serpinf2			Serpinf2			Serpinf2			Serpinf2			Serpinf2			Ighm			Serpinf2			Serpinf2			Serpinf2			Serpinf2
Atf3			Atf3			Atf3			Atf3			Atf3			Atf3			Atf3			Gm49375			Atf3			Atf3			Atf3			Atf3
Anxa4			Anxa4			Anxa4			Anxa4			Anxa4			Anxa4			Anxa4			Serpinf2			Anxa4			Anxa4			Anxa4			Anxa4
Cort			Cort			Cort			Cort			Cort			Cort			Cort			Atf3			Cort			Cort			Cort			Cort
Gm34567			Gm34567			Gm34567			Gm34567			Gm34567			Gm34567			Gm34567			Anxa4			Gm34567			Gm34567			Gm34567			Gm34567
Aif1			Aif1			Aif1			Aif1			Aif1			Aif1			Aif1			Cort			Aif1			Aif1			Aif1			Aif1
Mlph			Mlph			Mlph			Mlph			Mlph			Mlph			Mlph			Gm34567			Mlph			Mlph			Mlph			Mlph
Gm42756			Gm42756			Gm42756			Gm42756			Gm42756			Gm42756			Gm42756			Aif1			Gm42756			Gm42756			Gm42756			Gm42756
Cbx8			Cbx8			Cbx8			Cbx8			Cbx8			Cbx8			Cbx8			Mlph			Cbx8			Cbx8			Cbx8			Cbx8
Pla1a			Pla1a			Pla1a			Pla1a			Pla1a			Pla1a			Pla1a			Gm42756			Pla1a			Pla1a			Pla1a			Pla1a
C1ra			C1ra			C1ra			C1ra			C1ra			C1ra			C1ra			Cbx8			C1ra			C1ra			C1ra			C1ra
Gm36757			Gm36757			Gm36757			Gm36757			Gm36757			Gm36757			Gm36757			Pla1a			Gm36757			Gm36757			Gm36757			Gm36757
Dtx3l			Dtx3l			Dtx3l			Dtx3l			Dtx3l			Dtx3l			Dtx3l			C1ra			Dtx3l			Dtx3l			Dtx3l			Dtx3l
Naaa			Naaa			Naaa			Naaa			Naaa			Naaa			Naaa			Gm36757			Naaa			Naaa			Naaa			Naaa
Aspm			Aspm			Aspm			Aspm			Aspm			Aspm			Aspm			Dtx3l			Aspm			Aspm			Aspm			Aspm
Nckap1l			Nckap1l			Nckap1l			Nckap1l			Nckap1l			Nckap1l			Nckap1l			Naaa			Nckap1l			Nckap1l			Nckap1l			Nckap1l
Hmcn1			Hmcn1			Hmcn1			Hmcn1			Hmcn1			Hmcn1			Hmcn1			Aspm			Hmcn1			Hmcn1			Hmcn1			Hmcn1
Cdh23			Cdh23			Cdh23			Cdh23			Cdh23			Cdh23			Cdh23			Nckap1l			Cdh23			Cdh23			Cdh23			Cdh23
9330199G10Rik			9330199G10Rik			9330199G10Rik			9330199G10Rik			9330199G10Rik			9330199G10Rik			9330199G10Rik			Hmcn1			9330199G10Rik			9330199G10Rik			9330199G10Rik			9330199G10Rik
Liph			Liph			Liph			Liph			Liph			Liph			Liph			Cdh23			Liph			Liph			Liph			Liph
Rrm2			Rrm2			Rrm2			Rrm2			Rrm2			Rrm2			Rrm2			9330199G10Rik			Rrm2			Rrm2			Rrm2			Rrm2
Cyp11a1			Cyp11a1			Cyp11a1			Cyp11a1			Cyp11a1			Cyp11a1			Cyp11a1			Liph			Cyp11a1			Cyp11a1			Cyp11a1			Cyp11a1
Ifih1			Ifih1			Ifih1			Ifih1			Ifih1			Ifih1			Ifih1			Rrm2			Ifih1			Ifih1			Ifih1			Ifih1
Parp14			Parp14			Parp14			Parp14			Parp14			Parp14			Parp14			Cyp11a1			Parp14			Parp14			Parp14			Parp14
Adamtsl3			Adamtsl3			Adamtsl3			Adamtsl3			Adamtsl3			Adamtsl3			Adamtsl3			Ifih1			Adamtsl3			Adamtsl3			Adamtsl3			Adamtsl3
Chst3			Chst3			Chst3			Chst3			Chst3			Chst3			Chst3			Parp14			Chst3			Chst3			Chst3			Chst3
Ccl12			Ccl12			Ccl12			Ccl12			Ccl12			Ccl12			Ccl12			Adamtsl3			Ccl12			Ccl12			Ccl12			Ccl12
Lag3			Lag3			Lag3			Lag3			Lag3			Lag3			Lag3			Chst3			Lag3			Lag3			Lag3			Lag3
Ifi27			Ifi27			Ifi27			Ifi27			Ifi27			Ifi27			Ifi27			Ccl12			Ifi27			Ifi27			Ifi27			Ifi27
Ptpn6			Ptpn6			Ptpn6			Ptpn6			Ptpn6			Ptpn6			Ptpn6			Lag3			Ptpn6			Ptpn6			Ptpn6			Ptpn6
Pcdhb3			Pcdhb3			Pcdhb3			Pcdhb3			Pcdhb3			Pcdhb3			Pcdhb3			Ifi27			Pcdhb3			Pcdhb3			Pcdhb3			Pcdhb3
A330015K06Rik			A330015K06Rik			A330015K06Rik			A330015K06Rik			A330015K06Rik			A330015K06Rik			A330015K06Rik			Ptpn6			A330015K06Rik			A330015K06Rik			A330015K06Rik			A330015K06Rik
Kcnj5			Kcnj5			Kcnj5			Kcnj5			Kcnj5			Kcnj5			Kcnj5			Pcdhb3			Kcnj5			Kcnj5			Kcnj5			Kcnj5
Lat2			Lat2			Lat2			Lat2			Lat2			Lat2			Lat2			A330015K06Rik			Lat2			Lat2			Lat2			Lat2
Irf7			Irf7			Irf7			Irf7			Irf7			Irf7			Irf7			Kcnj5			Irf7			Irf7			Irf7			Irf7
Hck			Hck			Hck			Hck			Hck			Hck			Hck			Lat2			Hck			Hck			Hck			Hck
H2-Q4			H2-Q4			H2-Q4			H2-Q4			H2-Q4			H2-Q4			H2-Q4			Irf7			H2-Q4			H2-Q4			H2-Q4			H2-Q4
Pycard			Pycard			Pycard			Pycard			Pycard			Pycard			Pycard			Hck			Pycard			Pycard			Pycard			Pycard
Sncaip			Sncaip			Sncaip			Sncaip			Sncaip			Sncaip			Sncaip			H2-Q4			Sncaip			Sncaip			Sncaip			Sncaip
Mmp15			Mmp15			Mmp15			Mmp15			Mmp15			Mmp15			Mmp15			Pycard			Mmp15			Mmp15			Mmp15			Mmp15
Tmem163			Tmem163			Tmem163			Tmem163			Tmem163			Tmem163			Tmem163			Sncaip			Tmem163			Tmem163			Tmem163			Tmem163
Agmo			Agmo			Agmo			Agmo			Agmo			Agmo			Agmo			Mmp15			Agmo			Agmo			Agmo			Agmo
H3c3			H3c3			H3c3			H3c3			H3c3			H3c3			H3c3			Tmem163			H3c3			H3c3			H3c3			H3c3
Zim2			Zim2			Zim2			Zim2			Zim2			Zim2			Zim2			Agmo			Zim2			Zim2			Zim2			Zim2
Fermt1			Fermt1			Fermt1			Fermt1			Fermt1			Fermt1			Fermt1			H3c3			Fermt1			Fermt1			Fermt1			Fermt1
Wfdc17			Wfdc17			Wfdc17			Wfdc17			Wfdc17			Wfdc17			Wfdc17			Zim2			Wfdc17			Wfdc17			Wfdc17			Wfdc17
mt-Co3			mt-Co3			mt-Co3			mt-Co3			mt-Co3			mt-Co3			mt-Co3			Fermt1			mt-Co3			mt-Co3			mt-Co3			mt-Co3
Gm11749			Gm11749			Gm11749			Gm11749			Gm11749			Gm11749			Gm11749			Wfdc17			Gm11749			Gm11749			Gm11749			Gm11749
Gm42047			Gm42047			Gm42047			Gm42047			Gm42047			Gm42047			Gm42047			mt-Co3			Gm42047			Gm42047			Gm42047			Gm42047
Itgb5			Itgb5			Itgb5			Itgb5			Itgb5			Itgb5			Itgb5			Gm11749			Itgb5			Itgb5			Itgb5			Itgb5
Mgst1			Mgst1			Mgst1			Mgst1			Mgst1			Mgst1			Mgst1			Gm42047			Mgst1			Mgst1			Mgst1			Mgst1
H3c2			H3c2			H3c2			H3c2			H3c2			H3c2			H3c2			Itgb5			H3c2			H3c2			H3c2			H3c2
Prss50			Prss50			Prss50			Prss50			Prss50			Prss50			Prss50			Mgst1			Prss50			Prss50			Prss50			Prss50
Tex11			Tex11			Tex11			Tex11			Tex11			Tex11			Tex11			H3c2			Tex11			Tex11			Tex11			Tex11
Osmr			Osmr			Osmr			Osmr			Osmr			Osmr			Osmr			Prss50			Osmr			Osmr			Osmr			Osmr
Tcf7l2			Tcf7l2			Tcf7l2			Tcf7l2			Tcf7l2			Tcf7l2			Tcf7l2			Tex11			Tcf7l2			Tcf7l2			Tcf7l2			Tcf7l2
Dpysl5			Dpysl5			Dpysl5			Dpysl5			Dpysl5			Dpysl5			Dpysl5			Osmr			Dpysl5			Dpysl5			Dpysl5			Dpysl5
Il33			Il33			Il33			Il33			Il33			Il33			Il33			Tcf7l2			Il33			Il33			Il33			Il33
Ccl3			Ccl3			Ccl3			Ccl3			Ccl3			Ccl3			Ccl3			Dpysl5			Ccl3			Ccl3			Ccl3			Ccl3
Gm40466			Gm40466			Gm40466			Gm40466			Gm40466			Gm40466			Gm40466			Il33			Gm40466			Gm40466			Gm40466			Gm40466
Bst2			Bst2			Bst2			Bst2			Bst2			Bst2			Bst2			Ccl3			Bst2			Bst2			Bst2			Bst2
Hexb			Hexb			Hexb			Hexb			Hexb			Hexb			Hexb			Gm40466			Hexb			Hexb			Hexb			Hexb
Tlr4			Tlr4			Tlr4			Tlr4			Tlr4			Tlr4			Tlr4			Bst2			Tlr4			Tlr4			Tlr4			Tlr4
Pros1			Pros1			Pros1			Pros1			Pros1			Pros1			Pros1			Hexb			Pros1			Pros1			Pros1			Pros1
Chil1			Chil1			Chil1			Chil1			Chil1			Chil1			Chil1			Tlr4			Chil1			Chil1			Chil1			Chil1
Slfn8			Slfn8			Slfn8			Slfn8			Slfn8			Slfn8			Slfn8			Pros1			Slfn8			Slfn8			Slfn8			Slfn8
Kif20a			Kif20a			Kif20a			Kif20a			Kif20a			Kif20a			Kif20a			Chil1			Kif20a			Kif20a			Kif20a			Kif20a
Ankdd1b			Ankdd1b			Ankdd1b			Ankdd1b			Ankdd1b			Ankdd1b			Ankdd1b			Slfn8			Ankdd1b			Ankdd1b			Ankdd1b			Ankdd1b
Vmn1r90			Vmn1r90			Vmn1r90			Vmn1r90			Vmn1r90			Vmn1r90			Vmn1r90			Kif20a			Vmn1r90			Vmn1r90			Vmn1r90			Vmn1r90
Crhbp			Crhbp			Crhbp			Crhbp			Crhbp			Crhbp			Crhbp			Ankdd1b			Crhbp			Crhbp			Crhbp			Crhbp
S100b			S100b			S100b			S100b			S100b			S100b			S100b			Vmn1r90			S100b			S100b			S100b			S100b
Adgrv1			Adgrv1			Adgrv1			Adgrv1			Adgrv1			Adgrv1			Adgrv1			Crhbp			Adgrv1			Adgrv1			Adgrv1			Adgrv1
Kif11			Kif11			Kif11			Kif11			Kif11			Kif11			Kif11			S100b			Kif11			Kif11			Kif11			Kif11
Gm47860			Gm47860			Gm47860			Gm47860			Gm47860			Gm47860			Gm47860			Adgrv1			Gm47860			Gm47860			Gm47860			Gm47860
Lars2			Lars2			Lars2			Lars2			Lars2			Lars2			Lars2			Kif11			Lars2			Lars2			Lars2			Lars2
Mmp19			Mmp19			Mmp19			Mmp19			Mmp19			Mmp19			Mmp19			Gm47860			Mmp19			Mmp19			Mmp19			Mmp19
Tlr1			Tlr1			Tlr1			Tlr1			Tlr1			Tlr1			Tlr1			Lars2			Tlr1			Tlr1			Tlr1			Tlr1
Gbx2			Gbx2			Gbx2			Gbx2			Gbx2			Gbx2			Gbx2			Mmp19			Gbx2			Gbx2			Gbx2			Gbx2
Plscr1			Plscr1			Plscr1			Plscr1			Plscr1			Plscr1			Plscr1			Tlr1			Plscr1			Plscr1			Plscr1			Plscr1
Mfsd7a			Mfsd7a			Mfsd7a			Mfsd7a			Mfsd7a			Mfsd7a			Mfsd7a			Gbx2			Mfsd7a			Mfsd7a			Mfsd7a			Mfsd7a
Cbx2			Cbx2			Cbx2			Cbx2			Cbx2			Cbx2			Cbx2			Plscr1			Cbx2			Cbx2			Cbx2			Cbx2
Ckap2			Ckap2			Ckap2			Ckap2			Ckap2			Ckap2			Ckap2			Mfsd7a			Ckap2			Ckap2			Ckap2			Ckap2
Oas1a			Oas1a			Oas1a			Oas1a			Oas1a			Oas1a			Oas1a			Cbx2			Oas1a			Oas1a			Oas1a			Oas1a
Tmem267			Tmem267			Tmem267			Tmem267			Tmem267			Tmem267			Tmem267			Ckap2			Tmem267			Tmem267			Tmem267			Tmem267
Depp1			Depp1			Depp1			Depp1			Depp1			Depp1			Depp1			Oas1a			Depp1			Depp1			Depp1			Depp1
Gbp3			Gbp3			Gbp3			Gbp3			Gbp3			Gbp3			Gbp3			Tmem267			Gbp3			Gbp3			Gbp3			Gbp3
Eif2ak2			Eif2ak2			Eif2ak2			Eif2ak2			Eif2ak2			Eif2ak2			Eif2ak2			Depp1			Eif2ak2			Eif2ak2			Eif2ak2			Eif2ak2
Serpine1			Serpine1			Serpine1			Serpine1			Serpine1			Serpine1			Serpine1			Gbp3			Serpine1			Serpine1			Serpine1			Serpine1
Phf11b			Phf11b			Phf11b			Phf11b			Phf11b			Phf11b			Phf11b			Eif2ak2			Phf11b			Phf11b			Phf11b			Phf11b
Lef1			Lef1			Lef1			Lef1			Lef1			Lef1			Lef1			Serpine1			Lef1			Lef1			Lef1			Lef1
Trp73			Trp73			Trp73			Trp73			Trp73			Trp73			Trp73			Phf11b			Trp73			Trp73			Trp73			Trp73
Gpr34			Gpr34			Gpr34			Gpr34			Gpr34			Gpr34			Gpr34			Lef1			Gpr34			Gpr34			Gpr34			Gpr34
Trf			Trf			Trf			Trf			Trf			Trf			Trf			Trp73			Trf			Trf			Trf			Trf
Cdhr2			Cdhr2			Cdhr2			Cdhr2			Cdhr2			Cdhr2			Cdhr2			Gpr34			Cdhr2			Cdhr2			Cdhr2			Cdhr2
H2-Ob			H2-Ob			H2-Ob			H2-Ob			H2-Ob			H2-Ob			H2-Ob			Trf			H2-Ob			H2-Ob			H2-Ob			H2-Ob
Gm16551			Gm16551			Gm16551			Gm16551			Gm16551			Gm16551			Gm16551			Cdhr2			Gm16551			Gm16551			Gm16551			Gm16551
7630403G23Rik			7630403G23Rik			7630403G23Rik			7630403G23Rik			7630403G23Rik			7630403G23Rik			7630403G23Rik			H2-Ob			7630403G23Rik			7630403G23Rik			7630403G23Rik			7630403G23Rik
Mx1			Mx1			Mx1			Mx1			Mx1			Mx1			Mx1			Gm16551			Mx1			Mx1			Mx1			Mx1
Shc3			Shc3			Shc3			Shc3			Shc3			Shc3			Shc3			7630403G23Rik			Shc3			Shc3			Shc3			Shc3
Luzp2			Luzp2			Luzp2			Luzp2			Luzp2			Luzp2			Luzp2			Mx1			Luzp2			Luzp2			Luzp2			Luzp2
Gm16299			Gm16299			Gm16299			Gm16299			Gm16299			Gm16299			Gm16299			Shc3			Gm16299			Gm16299			Gm16299			Gm16299
Plscr2			Plscr2			Plscr2			Plscr2			Plscr2			Plscr2			Plscr2			Luzp2			Plscr2			Plscr2			Plscr2			Plscr2
Gimap4			Gimap4			Gimap4			Gimap4			Gimap4			Gimap4			Gimap4			Gm16299			Gimap4			Gimap4			Gimap4			Gimap4
Zfp57			Zfp57			Zfp57			Zfp57			Zfp57			Zfp57			Zfp57			Plscr2			Zfp57			Zfp57			Zfp57			Zfp57
Tbc1d16			Tbc1d16			Tbc1d16			Tbc1d16			Tbc1d16			Tbc1d16			Tbc1d16			Gimap4			Tbc1d16			Tbc1d16			Tbc1d16			Tbc1d16
Gm11681			Gm11681			Gm11681			Gm11681			Gm11681			Gm11681			Gm11681			Zfp57			Gm11681			Gm11681			Gm11681			Gm11681
Fam163a			Fam163a			Fam163a			Fam163a			Fam163a			Fam163a			Fam163a			Tbc1d16			Fam163a			Fam163a			Fam163a			Fam163a
Fcgr1			Fcgr1			Fcgr1			Fcgr1			Fcgr1			Fcgr1			Fcgr1			Gm11681			Fcgr1			Fcgr1			Fcgr1			Fcgr1
Olfr1372-ps1			Olfr1372-ps1			Olfr1372-ps1			Olfr1372-ps1			Olfr1372-ps1			Olfr1372-ps1			Olfr1372-ps1			Fam163a			Olfr1372-ps1			Olfr1372-ps1			Olfr1372-ps1			Olfr1372-ps1
Gnasas1			Gnasas1			Gnasas1			Gnasas1			Gnasas1			Gnasas1			Gnasas1			Fcgr1			Gnasas1			Gnasas1			Gnasas1			Gnasas1
Gm37161			Gm37161			Gm37161			Gm37161			Gm37161			Gm37161			Gm37161			Olfr1372-ps1			Gm37161			Gm37161			Gm37161			Gm37161
Hpse			Hpse			Hpse			Hpse			Hpse			Hpse			Hpse			Gnasas1			Hpse			Hpse			Hpse			Hpse
Unc5d			Unc5d			Unc5d			Unc5d			Unc5d			Unc5d			Unc5d			Gm37161			Unc5d			Unc5d			Unc5d			Unc5d
Adamts18			Adamts18			Adamts18			Adamts18			Adamts18			Adamts18			Adamts18			Hpse			Adamts18			Adamts18			Adamts18			Adamts18
Gm45104			Gm45104			Gm45104			Gm45104			Gm45104			Gm45104			Gm45104			Unc5d			Gm45104			Gm45104			Gm45104			Gm45104
A2m			A2m			A2m			A2m			A2m			A2m			A2m			Adamts18			A2m			A2m			A2m			A2m
Vangl1			Vangl1			Vangl1			Vangl1			Vangl1			Vangl1			Vangl1			Gm45104			Vangl1			Vangl1			Vangl1			Vangl1
Shisal1			Shisal1			Shisal1			Shisal1			Shisal1			Shisal1			Shisal1			A2m			Shisal1			Shisal1			Shisal1			Shisal1
Vipr2			Vipr2			Vipr2			Vipr2			Vipr2			Vipr2			Vipr2			Vangl1			Vipr2			Vipr2			Vipr2			Vipr2
Ly6g6f			Ly6g6f			Ly6g6f			Ly6g6f			Ly6g6f			Ly6g6f			Ly6g6f			Shisal1			Ly6g6f			Ly6g6f			Ly6g6f			Ly6g6f
Acer2			Acer2			Acer2			Acer2			Acer2			Acer2			Acer2			Vipr2			Acer2			Acer2			Acer2			Acer2
Adarb1			Adarb1			Adarb1			Adarb1			Adarb1			Adarb1			Adarb1			Ly6g6f			Adarb1			Adarb1			Adarb1			Adarb1
Cacna1g			Cacna1g			Cacna1g			Cacna1g			Cacna1g			Cacna1g			Cacna1g			Acer2			Cacna1g			Cacna1g			Cacna1g			Cacna1g
Gm37452			Gm37452			Gm37452			Gm37452			Gm37452			Gm37452			Gm37452			Adarb1			Gm37452			Gm37452			Gm37452			Gm37452
Ogn			Ogn			Ogn			Ogn			Ogn			Ogn			Ogn			Cacna1g			Ogn			Ogn			Ogn			Ogn
Hbb-bs			Hbb-bs			Hbb-bs			Hbb-bs			Hbb-bs			Hbb-bs			Hbb-bs			Gm37452			Hbb-bs			Hbb-bs			Hbb-bs			Hbb-bs
Hba-a1			Hba-a1			Hba-a1			Hba-a1			Hba-a1			Hba-a1			Hba-a1			Ogn			Hba-a1			Hba-a1			Hba-a1			Hba-a1
Hba-a2			Hba-a2			Hba-a2			Hba-a2			Hba-a2			Hba-a2			Hba-a2			Hbb-bs			Hba-a2			Hba-a2			Hba-a2			Hba-a2
Klk6			Klk6			Klk6			Klk6			Klk6			Klk6			Klk6			Hba-a1			Klk6			Klk6			Klk6			Klk6
Dsc3			Dsc3			Dsc3			Dsc3			Dsc3			Dsc3			Dsc3			Hba-a2			Dsc3			Dsc3			Dsc3			Dsc3
Spp1			Spp1			Spp1			Spp1			Spp1			Spp1			Spp1			Klk6			Spp1			Spp1			Spp1			Spp1
Clmn			Clmn			Clmn			Clmn			Clmn			Clmn			Clmn			Dsc3			Clmn			Clmn			Clmn			Clmn
Sh3d19			Sh3d19			Sh3d19			Sh3d19			Sh3d19			Sh3d19			Sh3d19			Spp1			Sh3d19			Sh3d19			Sh3d19			Sh3d19
Drd2			Drd2			Drd2			Drd2			Drd2			Drd2			Drd2			Clmn			Drd2			Drd2			Drd2			Drd2
Rgs16			Rgs16			Rgs16			Rgs16			Rgs16			Rgs16			Rgs16			Sh3d19			Rgs16			Rgs16			Rgs16			Rgs16
Slc14a1			Slc14a1			Slc14a1			Slc14a1			Slc14a1			Slc14a1			Slc14a1			Drd2			Slc14a1			Slc14a1			Slc14a1			Slc14a1
Hbb-bt			Hbb-bt			Hbb-bt			Hbb-bt			Hbb-bt			Hbb-bt			Hbb-bt			Rgs16			Hbb-bt			Hbb-bt			Hbb-bt			Hbb-bt
																					Slc14a1
																					Hbb-bt

## Sheet: CB YvM
Positive regulation of inflammatory response	9		Negative regulation of inflammatory response	6		Interferon-mediated signalling	9		Interleukin-mediated signalling	3		DAMs 2021	12		Microglial Exhaustion	2		Inflammasomes	2		cGAS-STING	1		Tfam-/-	23		LINE1 Derepression	8		TE Regulation	0		H3K9me3 proteome	0
Abcc1	Casp1		Abr	Cx3cr1		Adar	Ifih1		Akt1	Fcer1g		4632427E13Rik	Cd52		Ager	Cd274		Aim2	Casp1		Akt1	Ifi204		Abi3bp	Bst2		Bst2	Bst2		Actb			BCLAF1
Adam8	Ctss		Acod1	Gpr17		Arg1	Igtp		C1qtnf4	Oasl2		9130401M01Rik	Clec7a		Anxa1	Clec7a		Casp1	Naip2		Aurkb			Agrn	Dtx3l		Cxcl10	Ifi204		Actl6a			CHTOP
Adora2b	Fcer1g		Acp5	Igtp		Cactin	Irf7		Casp4	Parp14		Acaca	H2-D1		Bcl6			Casp4			Banf1			Apol9b	Gbp3		Ifi204	Ifi27		Actl6b			Crebrf
Adora3	H2-D1		Ada	Irgm1		Cdc37	Irgm1		Cd300lf			Ache	H2-K1		Ccl2			Ddx3x			Cdk1			Bst2	Gbp7		Ifi27	Ifih1		Ago2			CBX1
Aim2	H2-K1		Adcyap1	Nr1h3		Cnot7	Nlrc5		Cd4			Adarb1	Ifi204		Ccr2			Dhx33			Cgas			Ccl2	H2-Q4		Ifi30	Ifit1		Alkbh5			CBX3
Alox5ap	H2-Q4		Adipoq	Trem2		Dcst1	Oas1a		Cebpa			Adck5	Ifi27l2a		Ccr5			Gsdmd			Ifi204			Cmpk2	Ifih1		Ifih1	Ifit2		Arid1a			CBX5
Aoc3	Lgals1		Adora1			Dnaja3	Oas1b		Csf2rb			Ank	Ifit1		Cd244a			Il18			Irf3			Cxcl10	Ifit1		Ifit1	Ifit3		Arid1b			CCDC137
App	Snca		Adora2a			Eif4e2	Parp9		Csf2rb2			Ankrd16	Ifit2		Cd274			Il1b			Irf9			Dhx58	Ifit3		Ifit2	Mx1		Arid2			CCDC59
Btk	Trem2		Ahr			Fadd	Parp14		Ctr9			Apbb2	Lgals3bp		Cd38			Naip1			Lyplal1			Dtx3l	Ifit3b		Ifit3			Atf7ip			CCDC86
C2cd4a			Alox5			Gigyf2			Cxcr2			Aplp2	Lyz2		Cd72			Naip2			Map3k7			Enpep	Igtp		Ifitm1			Atrx			CEBPZ
C2cd4b			Aoah			Hdac4			Cyld			Apoe	Nlrc5		Cd74			Naip5			Nfkb1			Enpp2	Irf7		Ifitm3			Bap1			CHAF1A
C3			Apoa1			Hpx			Egr1			Aprt	Tyrobp		Cd86			Naip6			Parp1			Gbp2	Irgm1		Ifna1			Bcl7a			YBX3
Camk2n1			Apoe			Ifih1			Fcer1g			Arap2			Clec7a			Nlrc4			Ppp6c			Gbp3	Lgals3bp		Ifna2			Bcl7b			CUX1
Casp1			Arnt			Ifitm1			Fer			Arrdc4			Csf1			Nlrp1a			Prkdc			Gbp7	Oas1a		Ifne			Bcl7c			DDX17
Casp4			Ash1l			Ifitm2			Gab1			Asb10			Cxcl10			Nlrp1b			Sting1			H2-Q4	Oasl2		Irf5			Bicra			DDX5
Ccl1			Bcr			Ifitm3			Gfi1			Atf3			Entpd1			Nlrp3			Tab1			Helz2	Parp14		Isg15			Bicral			EBNA1BP2
Ccl3			C1qtnf3			Ifitm6			Ikbkb			Atp11c			Havcr2			Nlrp6			Tbk1			Ifi35	Parp9		Jak1			Brd4			ERH
Ccl5			C1qtnf12			Ifitm7			Ikbke			Atp6v0c			Icos			Pycard			Zbp1			Ifi44	Psmb8		Mal			Brd7			EXOSC10
Ccl24			Ccn3			Ifna1			Il11			Atp6v0c-ps2			Il2rb						Zdhhc18			Ifih1	Rnf213		Mx1			Brd9			FUS
Ccn4			Cd24a			Ifnar1			Il11ra1			Axl			Il33						Zdhhc9			Ifit1	Rtp4		Mx2			Cbx1			FYTTD1
Ccr2			Cd44			Ifnar2			Il11ra2			Baiap2l2			Il7r									Ifit3	Trim30a		Oas2			Cbx3			GATAD2A
Ccr5			Cd200			Ifnb1						Bcl2a1b			Kit									Ifit3b	Trim30d		Rigi			Cbx5			GATAD2B
Ccr7			Cd200l1			Ifng			Il12a			Birc5			Klf4									Igtp	Usp18		Stat1			Cdk2ap1			Nop53
Cd24a			Cd200l2			Ifngr1			Il12b			Bola2			Lag3									Iigp1			Stat3			Cdk2ap2			HDLBP
Cd28			Cd200r1			Ifngr2			Il12rb1			Cadm1			Ly96									Irf7			Tnfsf10			Chaf1a			HMGA1
Cd47			Cd276			Igtp			Il12rb2			Capg			Myd88									Irf9						Chaf1b			HNRNPA2B1
Cd81			Cdh5			Ikbke			Il15			Ccdc88a			Nfkb1									Irgm1						Chd3			HNRNPK
Cebpa			Chrna7			Irak1			Il15ra			Ccl3			P2rx7									Irgm2						Chd4			HNRNPL
Cebpb			Cst7			Irf1			Il17a			Ccl4			Pdcd1									Isg15						Chd5			HP1BP3
Clock			Ctla2a			Irf3			Il17f			Ccl6			Prickle1									Lgals3bp						Ctcf			KHDRBS1
Cnr1			Cx3cr1			Irf7			Il17ra			Cd22			S100a8									Mx2						Daxx			KHDRBS3
Csf1r			Cxcl17			Irgm1			Il17rc			Cd34			Satb1									Oas1a						Ddx4			LLPH
Ctsc			Cyld			Irgm2			Il18			Cd52			Sirpa									Oasl2						Dgcr8			LOXL1
Ctss			Cyp19a1			Isg15			Il18r1			Cd63			Socs3									Parp10						Dhx9			LOXL2
Ddt			Dusp10			Jak1			Il18rap			Cd74			Spp1									Parp14						Dicer1			LTBP2
Dhx9			Elf4			Jak2			Il1a			Cd83			Stat1									Parp9						Dnmt1			MATR3
Ets1			Enpp3			Lsm14a			Il1b			Cd9			Tcf7									Psmb8						Dnmt3a			MBD3
Fabp4			Ets1			Mavs			Il1r1			Cdc42ep3			Ticam1									Rigi						Dnmt3b			MBNL1
Fcer1a			Extl3			Med1			Il1r2			Cdca8			Ticam2									Rnf213						Dnmt3c			MPHOSPH10
Fcer1g			Fcgr2b			Mettl3			Il1rap			Ch25h			Tirap									Rtp4						Dnmt3l			MRTO4
Fcgr1			Fem1a			Mmp12			Il1rl1			Chst1												Sim2						Dpf1			MYBBP1A
Fcgr3			Fem1al			Mul1			Il1rn			Clec7a												Slfn2						Dpf2			MYEF2
Fem1a			Ffar4			Myd88			Il2			Cops9												Stat1						Dpf3			NCOA5
Ffar2			Fndc4			Nlrc5			Il2ra			Cox6a2												Stat2						Drosha			NCOA7
Ffar3			Foxf1			Oas1a			Il2rb			Cox6c												Tgtp1						Ehmt1			NONO
Gpr4			Foxp3			Oas1b			Il2rg			Cpd												Trim30a						Ehmt2			PES1
Gprc5b			Fpr2			Oas1c			Il3			Crip1												Trim30d						Elp3			PHB
Gpsm3			Fpr3			Oas1d			Il33			Crlf2												Usp18						Fto			PIAS2
Grn			Fpr-rs3			Oas1e			Il34			Csf1												Xaf1						Gatad2a			POLDIP3
Gsdmd			Fpr-rs4			Oas1f			Il3ra			Csf2ra												Zbp1						Gatad2b			PPAN
H2-D1			Fpr-rs6			Oas1g			Il4			Cst7																		Gtsf1			PPHLN1
H2-K1			Fpr-rs7			Oas1h			Il4ra			Ctsb																		H3f3a			PRDM15
H2-M1			Fxr1			Oas2			Il5			Ctsz																		H3f3b			PRMT1
H2-M2			Gata3			Oas3			Il5ra			Cxcl16																		H3f3c			PRRX2
H2-M5			Ghrl			Otop1			Il6			Cybb																		Hdac1			PTBP1
H2-M9			Ghsr			Parp9			Il6ra			Dhcr7																		Hdac2			QKI
H2-M10.1			Git1			Parp14			Il6st			Dhx32																		Hinfp			RBM12B1
H2-M10.2			Gper1			Pparg			Il9r			Dnajc15																		Kmt5b			RBM15
H2-M10.3			Gpr17			Ptpn2			Irak1			Dpcd																		Kmt5c			RBM26
H2-M10.4			Gpr31b			Rbm47			Irak2			Dpp7																		Lig1			RBM6
H2-M10.5			Gps2			Rfpl4b			Irak3			Dusp3																		Mbd2			RBMX
H2-M10.6			Gpx1			Rnf185			Irak4			Echs1																		Mbd3			RBMXL1
H2-M11			Gpx2			Samhd1			Jak1			Egr2																		Mbd5			RELA
H2-Q1			Grn			Sin3a			Jak2			Ell2																		Mbd6			RIF1
H2-Q2			Gstp1			Smim30			Jak3			Enpp1																		Mettl14			RPF1
H2-Q4			Hamp			Stat1			Lyn			Enpp2																		Mettl16			RPF2
H2-Q6			Hgf			Stat2			Map3k7			Ero1b																		Mettl3			RPS19BP1
H2-Q7			Ier3			Sting1			Mapk3			Etl4																		Morc1			SAFB
H2-Q10			Igf1			Tbk1			Mir301			Fam20c																		Morc2a			SAFB2
H2-T3			Igtp			Trex1			Myd88			Fcgr4																		Morc2b			SETDB1
H2-T9			Il2			Trim6			Nfkbia			Fgl2																		Morc3			SFPQ
H2-T10			Il2ra			Trim41			Nlrp6			Frrs1																		Mov10l1			TRA2B
H2-T22			Il4			Trim56			Notch1			Fth1																		Mphosph8			SLTM
H2-T23			Il10			Trim65			Oas2			Ftl1																		Mta1			SUMO2
Hyal2			Il10ra			Trp53			Oasl1			Fxyd5																		Mta2			SUV39H1
Ido1			Il12b			Ttll12			Oasl2			Fxyd6																		Mta3			SUV39H2
Ifi35			Il13			Txk			Otud4			Gfus																		Mtr4			SUZ12
Ifng			Il17a			Tyk2			Parp14			Glipr1																		Nsun2			TAF15
Ighg1			Il20rb			Ube2k			Pdgfb			Gm15772																		Ogt			TARDBP
Ighg2b			Il22			Usp27x			Pik3r1			Gnas																		Pabpn1			TCF25
Il1b			Il22ra1			Usp29			Plcb1			Gng12																		Pbrm1			THRAP3
Il1rl1			Il22ra2			Wnt5a			Ptpn2			Got1																		Phf10			TRA2A
Il6			Il33			Ythdf2			Rela			Gpnmb																		Piwil1			TRIM28
Il16			Ins1			Ythdf3			Ripk1			Gpr65																		Piwil2			UBE2I
Il17ra			Ins2			Zbp1			Rps6ka4			Gusb																		Piwil4			UTP3
Il17rb			Irgm1						Rps6ka5			H2-D1																		Pld6			WDR46
Il18			Irgm2						Smad4			H2-K1																		Pphln1			XRN2
Il33			Isl1						Spi1			H2-Q7																		Pspc1			YBX1
Kars1			Krt1						Src			Hif1a																		Rbbp4			YLPM1
Kcnn4			Ldlr						Srsf1			Ifi204																		Rbbp7			YTHDC1
Lbp			Lgals9						St18			Ifi27l2a																		Rbm26			YY2
Ldlr			Lpcat3						Stat1			Ifi27l2b																		Rbm27			ZC3H13
Lgals1			Lrfn5						Stat3			Ifit1																		Rbm7			Zfp207
Lgals2			Macir						Stat4			Ifit2																		Safb			Zfp326
Lilra5			Mdk						Stat5a			Igf1																		Safb2			Zfp438
Lpl			Mefv						Stat6			Il1b																		Setdb1			Zfp512
Lrrk2			Metrnl						Syk			Ildr2																		Setdb2			Zfp598
Lta			Mfhas1						Ticam2			Itgax																		Sin3a			Zfp622
Mdk			Mir147						Tirap			Kcnj2																		Sinhcaf			Zfp638
Mefv			Mir7578						Tnip2			Lgals3bp																		Sirt1
Mmp8			Mkrn2						Tollip			Lgi2																		Sirt6
Napepld			Muc19						Traf2			Lmbrd2																		Sltm
Nfkbia			Mvk						Traf3ip2			Lpl																		Smarca2
Nfkbiz			Ndfip1						Traf5			Lyz2																		Smarca4
Ninj1			Nfkb1						Traf6			Lyzl4																		Smarcb1
Nkg7			Nlrc3						Trim32			Mamdc2																		Smarcc1
Nlrp1a			Nlrp3						Tut4			Mblac2																		Smarcc2
Nlrp1b			Nlrp6						Tyk2			Mif																		Smarcd1
Nlrp3			Nlrp12						Usp25			Mir682																		Smarcd2
Nlrp6			Nlrx1						Vrk2			Mrpl27																		Smarcd3
Nlrp10			Nod2						Yap1			Mt1																		Smarce1
Nmi			Npy						Zbp1			Myo1e																		Spen
Nppa			Npy5r									Naglu																		Spocd1
Npy5r			Nr1d1									Nat8l																		Ss18
Nupr1			Nr1d2									Ncbp2as2																		Ss18l1
Osm			Nr1h3									Nceh1																		Ss18l2
Park7			Nr1h4									Ndufv3																		Sumo2
Pdcd4			Nr1h5									Nlrc5																		Suv39h1
Pde2a			Nt5e									Npc2																		Suv39h2
Pde5a			Otulin									Pkib																		Tarbp2
Pik3cg			Pbk									Pld3																		Tasor
Pla2g3			Pdcd10									Pogk																		Tasor2
Plcg2			Pf4									Psat1																		Tet1
Prkca			Pglyrp1									Pycrl																		Tet2
Ptger3			Pla2g5									Ramp1																		Tex15
Ptger4			Pla2g10									Rap2b																		Tnrc18
Ptgs2			Ppara									Rpl23																		Trim28
Pycard			Ppard									Rps18																		Uhrf1
Ripk1			Pparg									Rras																		Uhrf2
Rps19			Proc									S1pr1																		Wiz
S100a8			Psma1									Scd2																		Wtap
S100a9			Psmb4									Scpep1																		Ytdc1
Serpine1			Ptger4									Sdc3																		Ytdc2
Setd4			Ptgis									Serpine2																		Ytdfh2
Snca			Ptpn2									Slamf9																		Ytdhf3
Snx4			Ptpn6									Slc1a2																		Ythdf1
Stap1			Rabgef1									Slc23a2																		Yy1
Stat5a			Rb1									Slc44a1																		Zc3h13
Stat5b			Reg3g									Speg																		Zc3h3
Sucnr1			Rora									Spp1																		Zcchc8
Tac1			Rps19									Srebf2																		Zfc3h1
Tafa3			Selenos									Ssh1
Tgfb1			Sharpin									Ssr4
Tlr2			Siglece									St14
Tlr4			Siglecg									St8sia6
Tlr6			Sirpa									Stim2
Tnf			Slamf8									Sulf2
Tnfrsf1a			Slc39a8									Syngr1
Tnfrsf11a			Smad3									Tbcd
Tnfsf4			Smpdl3b									Thbs1
Tnfsf11			Socs3									Tmem154
Tnfsf18			Socs5									Tpd52
Tnip1			Sod1									Trim32
Tradd			Spn									Tspo
Trem2			Stat3									Ttf1
Trpv4			Syt11									Ttr
Tslp			Tafa3									Tuba1c
Ttbk1			Tff2									Tyrobp
Vamp8			Tnfaip3									Upp2
Wnt5a			Tnfaip6									Zdhhc21
Zbp1			Tnfaip8l2									Zfas1
Zp3			Tnfrsf1a									Zfp692
			Tnfrsf1b
			Trem2
			Trim45
			Trim65
			Tyro3
			Uaca
			Vps35
			Wfdc1
			Zfp36
Ostn			Ostn			Ostn			Ostn			Ostn			Ostn			Ostn						Ostn			Ostn			Ostn			Ostn
Ifit1			Ifit1			Ifit1			Ifit1			Ifit1			Ifit1			Ifit1						Ifit1			Ifit1			Ifit1			Ifit1
Abca8a			Abca8a			Abca8a			Abca8a			Abca8a			Abca8a			Abca8a			Ostn			Abca8a			Abca8a			Abca8a			Abca8a
Ifit3b			Ifit3b			Ifit3b			Ifit3b			Ifit3b			Ifit3b			Ifit3b			Ifit1			Ifit3b			Ifit3b			Ifit3b			Ifit3b
Zc3hav1			Zc3hav1			Zc3hav1			Zc3hav1			Zc3hav1			Zc3hav1			Zc3hav1			Abca8a			Zc3hav1			Zc3hav1			Zc3hav1			Zc3hav1
Col23a1			Col23a1			Col23a1			Col23a1			Col23a1			Col23a1			Col23a1			Ifit3b			Col23a1			Col23a1			Col23a1			Col23a1
Irgm1			Irgm1			Irgm1			Irgm1			Irgm1			Irgm1			Irgm1			Zc3hav1			Irgm1			Irgm1			Irgm1			Irgm1
C4b			C4b			C4b			C4b			C4b			C4b			C4b			Col23a1			C4b			C4b			C4b			C4b
Rem2			Rem2			Rem2			Rem2			Rem2			Rem2			Rem2			Irgm1			Rem2			Rem2			Rem2			Rem2
Ctss			Ctss			Ctss			Ctss			Ctss			Ctss			Ctss			C4b			Ctss			Ctss			Ctss			Ctss
Zfp57			Zfp57			Zfp57			Zfp57			Zfp57			Zfp57			Zfp57			Rem2			Zfp57			Zfp57			Zfp57			Zfp57
Ifit3			Ifit3			Ifit3			Ifit3			Ifit3			Ifit3			Ifit3			Ctss			Ifit3			Ifit3			Ifit3			Ifit3
Nr3c2			Nr3c2			Nr3c2			Nr3c2			Nr3c2			Nr3c2			Nr3c2			Zfp57			Nr3c2			Nr3c2			Nr3c2			Nr3c2
9630013A20Rik			9630013A20Rik			9630013A20Rik			9630013A20Rik			9630013A20Rik			9630013A20Rik			9630013A20Rik			Ifit3			9630013A20Rik			9630013A20Rik			9630013A20Rik			9630013A20Rik
Trem2			Trem2			Trem2			Trem2			Trem2			Trem2			Trem2			Nr3c2			Trem2			Trem2			Trem2			Trem2
Snca			Snca			Snca			Snca			Snca			Snca			Snca			9630013A20Rik			Snca			Snca			Snca			Snca
Ifih1			Ifih1			Ifih1			Ifih1			Ifih1			Ifih1			Ifih1			Trem2			Ifih1			Ifih1			Ifih1			Ifih1
Oasl2			Oasl2			Oasl2			Oasl2			Oasl2			Oasl2			Oasl2			Snca			Oasl2			Oasl2			Oasl2			Oasl2
Trank1			Trank1			Trank1			Trank1			Trank1			Trank1			Trank1			Ifih1			Trank1			Trank1			Trank1			Trank1
Gbp7			Gbp7			Gbp7			Gbp7			Gbp7			Gbp7			Gbp7			Oasl2			Gbp7			Gbp7			Gbp7			Gbp7
Mpeg1			Mpeg1			Mpeg1			Mpeg1			Mpeg1			Mpeg1			Mpeg1			Trank1			Mpeg1			Mpeg1			Mpeg1			Mpeg1
Ifit2			Ifit2			Ifit2			Ifit2			Ifit2			Ifit2			Ifit2			Gbp7			Ifit2			Ifit2			Ifit2			Ifit2
Serping1			Serping1			Serping1			Serping1			Serping1			Serping1			Serping1			Mpeg1			Serping1			Serping1			Serping1			Serping1
Nectin3			Nectin3			Nectin3			Nectin3			Nectin3			Nectin3			Nectin3			Ifit2			Nectin3			Nectin3			Nectin3			Nectin3
Trim30d			Trim30d			Trim30d			Trim30d			Trim30d			Trim30d			Trim30d			Serping1			Trim30d			Trim30d			Trim30d			Trim30d
Ifi204			Ifi204			Ifi204			Ifi204			Ifi204			Ifi204			Ifi204			Nectin3			Ifi204			Ifi204			Ifi204			Ifi204
Clec7a			Clec7a			Clec7a			Clec7a			Clec7a			Clec7a			Clec7a			Trim30d			Clec7a			Clec7a			Clec7a			Clec7a
Tnc			Tnc			Tnc			Tnc			Tnc			Tnc			Tnc			Ifi204			Tnc			Tnc			Tnc			Tnc
Sqor			Sqor			Sqor			Sqor			Sqor			Sqor			Sqor			Clec7a			Sqor			Sqor			Sqor			Sqor
Nid1			Nid1			Nid1			Nid1			Nid1			Nid1			Nid1			Tnc			Nid1			Nid1			Nid1			Nid1
Parp9			Parp9			Parp9			Parp9			Parp9			Parp9			Parp9			Sqor			Parp9			Parp9			Parp9			Parp9
Bst2			Bst2			Bst2			Bst2			Bst2			Bst2			Bst2			Nid1			Bst2			Bst2			Bst2			Bst2
Usp18			Usp18			Usp18			Usp18			Usp18			Usp18			Usp18			Parp9			Usp18			Usp18			Usp18			Usp18
Mcm6			Mcm6			Mcm6			Mcm6			Mcm6			Mcm6			Mcm6			Bst2			Mcm6			Mcm6			Mcm6			Mcm6
Cda			Cda			Cda			Cda			Cda			Cda			Cda			Usp18			Cda			Cda			Cda			Cda
Synpr			Synpr			Synpr			Synpr			Synpr			Synpr			Synpr			Mcm6			Synpr			Synpr			Synpr			Synpr
Igtp			Igtp			Igtp			Igtp			Igtp			Igtp			Igtp			Cda			Igtp			Igtp			Igtp			Igtp
Ddx58			Ddx58			Ddx58			Ddx58			Ddx58			Ddx58			Ddx58			Synpr			Ddx58			Ddx58			Ddx58			Ddx58
Parp4			Parp4			Parp4			Parp4			Parp4			Parp4			Parp4			Igtp			Parp4			Parp4			Parp4			Parp4
Pcdhb11			Pcdhb11			Pcdhb11			Pcdhb11			Pcdhb11			Pcdhb11			Pcdhb11			Ddx58			Pcdhb11			Pcdhb11			Pcdhb11			Pcdhb11
Gm33489			Gm33489			Gm33489			Gm33489			Gm33489			Gm33489			Gm33489			Parp4			Gm33489			Gm33489			Gm33489			Gm33489
Ccnd1			Ccnd1			Ccnd1			Ccnd1			Ccnd1			Ccnd1			Ccnd1			Pcdhb11			Ccnd1			Ccnd1			Ccnd1			Ccnd1
Ntf3			Ntf3			Ntf3			Ntf3			Ntf3			Ntf3			Ntf3			Gm33489			Ntf3			Ntf3			Ntf3			Ntf3
Irf7			Irf7			Irf7			Irf7			Irf7			Irf7			Irf7			Ccnd1			Irf7			Irf7			Irf7			Irf7
Comp			Comp			Comp			Comp			Comp			Comp			Comp			Ntf3			Comp			Comp			Comp			Comp
Rorc			Rorc			Rorc			Rorc			Rorc			Rorc			Rorc			Irf7			Rorc			Rorc			Rorc			Rorc
Lgals3bp			Lgals3bp			Lgals3bp			Lgals3bp			Lgals3bp			Lgals3bp			Lgals3bp			Comp			Lgals3bp			Lgals3bp			Lgals3bp			Lgals3bp
Dsc2			Dsc2			Dsc2			Dsc2			Dsc2			Dsc2			Dsc2			Rorc			Dsc2			Dsc2			Dsc2			Dsc2
Tunar			Tunar			Tunar			Tunar			Tunar			Tunar			Tunar			Lgals3bp			Tunar			Tunar			Tunar			Tunar
Cd274			Cd274			Cd274			Cd274			Cd274			Cd274			Cd274			Dsc2			Cd274			Cd274			Cd274			Cd274
Tap2			Tap2			Tap2			Tap2			Tap2			Tap2			Tap2			Tunar			Tap2			Tap2			Tap2			Tap2
Utrn			Utrn			Utrn			Utrn			Utrn			Utrn			Utrn			Cd274			Utrn			Utrn			Utrn			Utrn
Ifi27			Ifi27			Ifi27			Ifi27			Ifi27			Ifi27			Ifi27			Tap2			Ifi27			Ifi27			Ifi27			Ifi27
Kcnb2			Kcnb2			Kcnb2			Kcnb2			Kcnb2			Kcnb2			Kcnb2			Utrn			Kcnb2			Kcnb2			Kcnb2			Kcnb2
Fmn1			Fmn1			Fmn1			Fmn1			Fmn1			Fmn1			Fmn1			Ifi27			Fmn1			Fmn1			Fmn1			Fmn1
B2m			B2m			B2m			B2m			B2m			B2m			B2m			Kcnb2			B2m			B2m			B2m			B2m
Mkrn3			Mkrn3			Mkrn3			Mkrn3			Mkrn3			Mkrn3			Mkrn3			Fmn1			Mkrn3			Mkrn3			Mkrn3			Mkrn3
Tor3a			Tor3a			Tor3a			Tor3a			Tor3a			Tor3a			Tor3a			B2m			Tor3a			Tor3a			Tor3a			Tor3a
Efemp1			Efemp1			Efemp1			Efemp1			Efemp1			Efemp1			Efemp1			Mkrn3			Efemp1			Efemp1			Efemp1			Efemp1
Gm16299			Gm16299			Gm16299			Gm16299			Gm16299			Gm16299			Gm16299			Tor3a			Gm16299			Gm16299			Gm16299			Gm16299
Pcdha8			Pcdha8			Pcdha8			Pcdha8			Pcdha8			Pcdha8			Pcdha8			Efemp1			Pcdha8			Pcdha8			Pcdha8			Pcdha8
Rnf213			Rnf213			Rnf213			Rnf213			Rnf213			Rnf213			Rnf213			Gm16299			Rnf213			Rnf213			Rnf213			Rnf213
Col1a1			Col1a1			Col1a1			Col1a1			Col1a1			Col1a1			Col1a1			Pcdha8			Col1a1			Col1a1			Col1a1			Col1a1
Itgb2			Itgb2			Itgb2			Itgb2			Itgb2			Itgb2			Itgb2			Rnf213			Itgb2			Itgb2			Itgb2			Itgb2
Gbp6			Gbp6			Gbp6			Gbp6			Gbp6			Gbp6			Gbp6			Col1a1			Gbp6			Gbp6			Gbp6			Gbp6
4930522L14Rik			4930522L14Rik			4930522L14Rik			4930522L14Rik			4930522L14Rik			4930522L14Rik			4930522L14Rik			Itgb2			4930522L14Rik			4930522L14Rik			4930522L14Rik			4930522L14Rik
3222401L13Rik			3222401L13Rik			3222401L13Rik			3222401L13Rik			3222401L13Rik			3222401L13Rik			3222401L13Rik			Gbp6			3222401L13Rik			3222401L13Rik			3222401L13Rik			3222401L13Rik
Mslnl			Mslnl			Mslnl			Mslnl			Mslnl			Mslnl			Mslnl			4930522L14Rik			Mslnl			Mslnl			Mslnl			Mslnl
Gbp10			Gbp10			Gbp10			Gbp10			Gbp10			Gbp10			Gbp10			3222401L13Rik			Gbp10			Gbp10			Gbp10			Gbp10
Pcdhga4			Pcdhga4			Pcdhga4			Pcdhga4			Pcdhga4			Pcdhga4			Pcdhga4			Mslnl			Pcdhga4			Pcdhga4			Pcdhga4			Pcdhga4
Oas1b			Oas1b			Oas1b			Oas1b			Oas1b			Oas1b			Oas1b			Gbp10			Oas1b			Oas1b			Oas1b			Oas1b
Itih3			Itih3			Itih3			Itih3			Itih3			Itih3			Itih3			Pcdhga4			Itih3			Itih3			Itih3			Itih3
Gbp3			Gbp3			Gbp3			Gbp3			Gbp3			Gbp3			Gbp3			Oas1b			Gbp3			Gbp3			Gbp3			Gbp3
Hexb			Hexb			Hexb			Hexb			Hexb			Hexb			Hexb			Itih3			Hexb			Hexb			Hexb			Hexb
Casp1			Casp1			Casp1			Casp1			Casp1			Casp1			Casp1			Gbp3			Casp1			Casp1			Casp1			Casp1
Slfn8			Slfn8			Slfn8			Slfn8			Slfn8			Slfn8			Slfn8			Hexb			Slfn8			Slfn8			Slfn8			Slfn8
Mir670hg			Mir670hg			Mir670hg			Mir670hg			Mir670hg			Mir670hg			Mir670hg			Casp1			Mir670hg			Mir670hg			Mir670hg			Mir670hg
Naip2			Naip2			Naip2			Naip2			Naip2			Naip2			Naip2			Slfn8			Naip2			Naip2			Naip2			Naip2
C1qc			C1qc			C1qc			C1qc			C1qc			C1qc			C1qc			Mir670hg			C1qc			C1qc			C1qc			C1qc
Cx3cr1			Cx3cr1			Cx3cr1			Cx3cr1			Cx3cr1			Cx3cr1			Cx3cr1			Naip2			Cx3cr1			Cx3cr1			Cx3cr1			Cx3cr1
Gabra2			Gabra2			Gabra2			Gabra2			Gabra2			Gabra2			Gabra2			C1qc			Gabra2			Gabra2			Gabra2			Gabra2
Nr1h3			Nr1h3			Nr1h3			Nr1h3			Nr1h3			Nr1h3			Nr1h3			Cx3cr1			Nr1h3			Nr1h3			Nr1h3			Nr1h3
Dock2			Dock2			Dock2			Dock2			Dock2			Dock2			Dock2			Gabra2			Dock2			Dock2			Dock2			Dock2
Nrep			Nrep			Nrep			Nrep			Nrep			Nrep			Nrep			Nr1h3			Nrep			Nrep			Nrep			Nrep
A530053G22Rik			A530053G22Rik			A530053G22Rik			A530053G22Rik			A530053G22Rik			A530053G22Rik			A530053G22Rik			Dock2			A530053G22Rik			A530053G22Rik			A530053G22Rik			A530053G22Rik
Ifi27l2a			Ifi27l2a			Ifi27l2a			Ifi27l2a			Ifi27l2a			Ifi27l2a			Ifi27l2a			Nrep			Ifi27l2a			Ifi27l2a			Ifi27l2a			Ifi27l2a
A330023F24Rik			A330023F24Rik			A330023F24Rik			A330023F24Rik			A330023F24Rik			A330023F24Rik			A330023F24Rik			A530053G22Rik			A330023F24Rik			A330023F24Rik			A330023F24Rik			A330023F24Rik
Slc44a5			Slc44a5			Slc44a5			Slc44a5			Slc44a5			Slc44a5			Slc44a5			Ifi27l2a			Slc44a5			Slc44a5			Slc44a5			Slc44a5
Ttyh3			Ttyh3			Ttyh3			Ttyh3			Ttyh3			Ttyh3			Ttyh3			A330023F24Rik			Ttyh3			Ttyh3			Ttyh3			Ttyh3
Trim12a			Trim12a			Trim12a			Trim12a			Trim12a			Trim12a			Trim12a			Slc44a5			Trim12a			Trim12a			Trim12a			Trim12a
Trim25			Trim25			Trim25			Trim25			Trim25			Trim25			Trim25			Ttyh3			Trim25			Trim25			Trim25			Trim25
Necab3			Necab3			Necab3			Necab3			Necab3			Necab3			Necab3			Trim12a			Necab3			Necab3			Necab3			Necab3
Cbx4			Cbx4			Cbx4			Cbx4			Cbx4			Cbx4			Cbx4			Trim25			Cbx4			Cbx4			Cbx4			Cbx4
H2-K1			H2-K1			H2-K1			H2-K1			H2-K1			H2-K1			H2-K1			Necab3			H2-K1			H2-K1			H2-K1			H2-K1
Pcdhga3			Pcdhga3			Pcdhga3			Pcdhga3			Pcdhga3			Pcdhga3			Pcdhga3			Cbx4			Pcdhga3			Pcdhga3			Pcdhga3			Pcdhga3
Trim30a			Trim30a			Trim30a			Trim30a			Trim30a			Trim30a			Trim30a			H2-K1			Trim30a			Trim30a			Trim30a			Trim30a
C1qa			C1qa			C1qa			C1qa			C1qa			C1qa			C1qa			Pcdhga3			C1qa			C1qa			C1qa			C1qa
Hspa2			Hspa2			Hspa2			Hspa2			Hspa2			Hspa2			Hspa2			Trim30a			Hspa2			Hspa2			Hspa2			Hspa2
Gm43864			Gm43864			Gm43864			Gm43864			Gm43864			Gm43864			Gm43864			C1qa			Gm43864			Gm43864			Gm43864			Gm43864
Gpr17			Gpr17			Gpr17			Gpr17			Gpr17			Gpr17			Gpr17			Hspa2			Gpr17			Gpr17			Gpr17			Gpr17
Golga7b			Golga7b			Golga7b			Golga7b			Golga7b			Golga7b			Golga7b			Gm43864			Golga7b			Golga7b			Golga7b			Golga7b
Ube2cbp			Ube2cbp			Ube2cbp			Ube2cbp			Ube2cbp			Ube2cbp			Ube2cbp			Gpr17			Ube2cbp			Ube2cbp			Ube2cbp			Ube2cbp
Nr6a1			Nr6a1			Nr6a1			Nr6a1			Nr6a1			Nr6a1			Nr6a1			Golga7b			Nr6a1			Nr6a1			Nr6a1			Nr6a1
Pcdhb14			Pcdhb14			Pcdhb14			Pcdhb14			Pcdhb14			Pcdhb14			Pcdhb14			Ube2cbp			Pcdhb14			Pcdhb14			Pcdhb14			Pcdhb14
Cracdl			Cracdl			Cracdl			Cracdl			Cracdl			Cracdl			Cracdl			Nr6a1			Cracdl			Cracdl			Cracdl			Cracdl
Itga4			Itga4			Itga4			Itga4			Itga4			Itga4			Itga4			Pcdhb14			Itga4			Itga4			Itga4			Itga4
Serpinb8			Serpinb8			Serpinb8			Serpinb8			Serpinb8			Serpinb8			Serpinb8			Cracdl			Serpinb8			Serpinb8			Serpinb8			Serpinb8
Cmtm7			Cmtm7			Cmtm7			Cmtm7			Cmtm7			Cmtm7			Cmtm7			Itga4			Cmtm7			Cmtm7			Cmtm7			Cmtm7
Gm45838			Gm45838			Gm45838			Gm45838			Gm45838			Gm45838			Gm45838			Serpinb8			Gm45838			Gm45838			Gm45838			Gm45838
Rab20			Rab20			Rab20			Rab20			Rab20			Rab20			Rab20			Cmtm7			Rab20			Rab20			Rab20			Rab20
Tyrobp			Tyrobp			Tyrobp			Tyrobp			Tyrobp			Tyrobp			Tyrobp			Gm45838			Tyrobp			Tyrobp			Tyrobp			Tyrobp
Eva1c			Eva1c			Eva1c			Eva1c			Eva1c			Eva1c			Eva1c			Rab20			Eva1c			Eva1c			Eva1c			Eva1c
Slc38a5			Slc38a5			Slc38a5			Slc38a5			Slc38a5			Slc38a5			Slc38a5			Tyrobp			Slc38a5			Slc38a5			Slc38a5			Slc38a5
Pdlim3			Pdlim3			Pdlim3			Pdlim3			Pdlim3			Pdlim3			Pdlim3			Eva1c			Pdlim3			Pdlim3			Pdlim3			Pdlim3
Pcdhb9			Pcdhb9			Pcdhb9			Pcdhb9			Pcdhb9			Pcdhb9			Pcdhb9			Slc38a5			Pcdhb9			Pcdhb9			Pcdhb9			Pcdhb9
Casp12			Casp12			Casp12			Casp12			Casp12			Casp12			Casp12			Pdlim3			Casp12			Casp12			Casp12			Casp12
Samd9l			Samd9l			Samd9l			Samd9l			Samd9l			Samd9l			Samd9l			Pcdhb9			Samd9l			Samd9l			Samd9l			Samd9l
Nlrc5			Nlrc5			Nlrc5			Nlrc5			Nlrc5			Nlrc5			Nlrc5			Casp12			Nlrc5			Nlrc5			Nlrc5			Nlrc5
Fcer1g			Fcer1g			Fcer1g			Fcer1g			Fcer1g			Fcer1g			Fcer1g			Samd9l			Fcer1g			Fcer1g			Fcer1g			Fcer1g
Ly9			Ly9			Ly9			Ly9			Ly9			Ly9			Ly9			Nlrc5			Ly9			Ly9			Ly9			Ly9
Syde1			Syde1			Syde1			Syde1			Syde1			Syde1			Syde1			Fcer1g			Syde1			Syde1			Syde1			Syde1
Dtx3l			Dtx3l			Dtx3l			Dtx3l			Dtx3l			Dtx3l			Dtx3l			Ly9			Dtx3l			Dtx3l			Dtx3l			Dtx3l
Parp14			Parp14			Parp14			Parp14			Parp14			Parp14			Parp14			Syde1			Parp14			Parp14			Parp14			Parp14
Trim34a			Trim34a			Trim34a			Trim34a			Trim34a			Trim34a			Trim34a			Dtx3l			Trim34a			Trim34a			Trim34a			Trim34a
Serpinb1b			Serpinb1b			Serpinb1b			Serpinb1b			Serpinb1b			Serpinb1b			Serpinb1b			Parp14			Serpinb1b			Serpinb1b			Serpinb1b			Serpinb1b
Lgals1			Lgals1			Lgals1			Lgals1			Lgals1			Lgals1			Lgals1			Trim34a			Lgals1			Lgals1			Lgals1			Lgals1
Eya4			Eya4			Eya4			Eya4			Eya4			Eya4			Eya4			Serpinb1b			Eya4			Eya4			Eya4			Eya4
Psmb8			Psmb8			Psmb8			Psmb8			Psmb8			Psmb8			Psmb8			Lgals1			Psmb8			Psmb8			Psmb8			Psmb8
Gvin3			Gvin3			Gvin3			Gvin3			Gvin3			Gvin3			Gvin3			Eya4			Gvin3			Gvin3			Gvin3			Gvin3
Parp12			Parp12			Parp12			Parp12			Parp12			Parp12			Parp12			Psmb8			Parp12			Parp12			Parp12			Parp12
Vgf			Vgf			Vgf			Vgf			Vgf			Vgf			Vgf			Gvin3			Vgf			Vgf			Vgf			Vgf
Etnppl			Etnppl			Etnppl			Etnppl			Etnppl			Etnppl			Etnppl			Parp12			Etnppl			Etnppl			Etnppl			Etnppl
Tnfrsf12a			Tnfrsf12a			Tnfrsf12a			Tnfrsf12a			Tnfrsf12a			Tnfrsf12a			Tnfrsf12a			Vgf			Tnfrsf12a			Tnfrsf12a			Tnfrsf12a			Tnfrsf12a
Pamr1			Pamr1			Pamr1			Pamr1			Pamr1			Pamr1			Pamr1			Etnppl			Pamr1			Pamr1			Pamr1			Pamr1
Unc93b1			Unc93b1			Unc93b1			Unc93b1			Unc93b1			Unc93b1			Unc93b1			Tnfrsf12a			Unc93b1			Unc93b1			Unc93b1			Unc93b1
Neu2			Neu2			Neu2			Neu2			Neu2			Neu2			Neu2			Pamr1			Neu2			Neu2			Neu2			Neu2
Col3a1			Col3a1			Col3a1			Col3a1			Col3a1			Col3a1			Col3a1			Unc93b1			Col3a1			Col3a1			Col3a1			Col3a1
Gm40466			Gm40466			Gm40466			Gm40466			Gm40466			Gm40466			Gm40466			Neu2			Gm40466			Gm40466			Gm40466			Gm40466
Ddx60			Ddx60			Ddx60			Ddx60			Ddx60			Ddx60			Ddx60			Col3a1			Ddx60			Ddx60			Ddx60			Ddx60
Cacna1e			Cacna1e			Cacna1e			Cacna1e			Cacna1e			Cacna1e			Cacna1e			Gm40466			Cacna1e			Cacna1e			Cacna1e			Cacna1e
Gm49980			Gm49980			Gm49980			Gm49980			Gm49980			Gm49980			Gm49980			Ddx60			Gm49980			Gm49980			Gm49980			Gm49980
Fzd1			Fzd1			Fzd1			Fzd1			Fzd1			Fzd1			Fzd1			Cacna1e			Fzd1			Fzd1			Fzd1			Fzd1
Rsad2			Rsad2			Rsad2			Rsad2			Rsad2			Rsad2			Rsad2			Gm49980			Rsad2			Rsad2			Rsad2			Rsad2
Tcap			Tcap			Tcap			Tcap			Tcap			Tcap			Tcap			Fzd1			Tcap			Tcap			Tcap			Tcap
Eif2ak2			Eif2ak2			Eif2ak2			Eif2ak2			Eif2ak2			Eif2ak2			Eif2ak2			Rsad2			Eif2ak2			Eif2ak2			Eif2ak2			Eif2ak2
Itpr3			Itpr3			Itpr3			Itpr3			Itpr3			Itpr3			Itpr3			Tcap			Itpr3			Itpr3			Itpr3			Itpr3
Aox3			Aox3			Aox3			Aox3			Aox3			Aox3			Aox3			Eif2ak2			Aox3			Aox3			Aox3			Aox3
Col4a1			Col4a1			Col4a1			Col4a1			Col4a1			Col4a1			Col4a1			Itpr3			Col4a1			Col4a1			Col4a1			Col4a1
Kcnb1			Kcnb1			Kcnb1			Kcnb1			Kcnb1			Kcnb1			Kcnb1			Aox3			Kcnb1			Kcnb1			Kcnb1			Kcnb1
Mir6236			Mir6236			Mir6236			Mir6236			Mir6236			Mir6236			Mir6236			Col4a1			Mir6236			Mir6236			Mir6236			Mir6236
Ppl			Ppl			Ppl			Ppl			Ppl			Ppl			Ppl			Kcnb1			Ppl			Ppl			Ppl			Ppl
Prr16			Prr16			Prr16			Prr16			Prr16			Prr16			Prr16			Mir6236			Prr16			Prr16			Prr16			Prr16
Ky			Ky			Ky			Ky			Ky			Ky			Ky			Ppl			Ky			Ky			Ky			Ky
Naalad2			Naalad2			Naalad2			Naalad2			Naalad2			Naalad2			Naalad2			Prr16			Naalad2			Naalad2			Naalad2			Naalad2
H2-Q4			H2-Q4			H2-Q4			H2-Q4			H2-Q4			H2-Q4			H2-Q4			Ky			H2-Q4			H2-Q4			H2-Q4			H2-Q4
Six4			Six4			Six4			Six4			Six4			Six4			Six4			Naalad2			Six4			Six4			Six4			Six4
Ifi203			Ifi203			Ifi203			Ifi203			Ifi203			Ifi203			Ifi203			H2-Q4			Ifi203			Ifi203			Ifi203			Ifi203
Pcdhgb1			Pcdhgb1			Pcdhgb1			Pcdhgb1			Pcdhgb1			Pcdhgb1			Pcdhgb1			Six4			Pcdhgb1			Pcdhgb1			Pcdhgb1			Pcdhgb1
Col1a2			Col1a2			Col1a2			Col1a2			Col1a2			Col1a2			Col1a2			Ifi203			Col1a2			Col1a2			Col1a2			Col1a2
Gm26448			Gm26448			Gm26448			Gm26448			Gm26448			Gm26448			Gm26448			Pcdhgb1			Gm26448			Gm26448			Gm26448			Gm26448
Pcdhgb6			Pcdhgb6			Pcdhgb6			Pcdhgb6			Pcdhgb6			Pcdhgb6			Pcdhgb6			Col1a2			Pcdhgb6			Pcdhgb6			Pcdhgb6			Pcdhgb6
Ezr			Ezr			Ezr			Ezr			Ezr			Ezr			Ezr			Gm26448			Ezr			Ezr			Ezr			Ezr
Ankdd1b			Ankdd1b			Ankdd1b			Ankdd1b			Ankdd1b			Ankdd1b			Ankdd1b			Pcdhgb6			Ankdd1b			Ankdd1b			Ankdd1b			Ankdd1b
Hydin			Hydin			Hydin			Hydin			Hydin			Hydin			Hydin			Ezr			Hydin			Hydin			Hydin			Hydin
C1qb			C1qb			C1qb			C1qb			C1qb			C1qb			C1qb			Ankdd1b			C1qb			C1qb			C1qb			C1qb
Mybl1			Mybl1			Mybl1			Mybl1			Mybl1			Mybl1			Mybl1			Hydin			Mybl1			Mybl1			Mybl1			Mybl1
Hvcn1			Hvcn1			Hvcn1			Hvcn1			Hvcn1			Hvcn1			Hvcn1			C1qb			Hvcn1			Hvcn1			Hvcn1			Hvcn1
Mx1			Mx1			Mx1			Mx1			Mx1			Mx1			Mx1			Mybl1			Mx1			Mx1			Mx1			Mx1
Qprt			Qprt			Qprt			Qprt			Qprt			Qprt			Qprt			Hvcn1			Qprt			Qprt			Qprt			Qprt
Adam19			Adam19			Adam19			Adam19			Adam19			Adam19			Adam19			Mx1			Adam19			Adam19			Adam19			Adam19
Olfr1372-ps1			Olfr1372-ps1			Olfr1372-ps1			Olfr1372-ps1			Olfr1372-ps1			Olfr1372-ps1			Olfr1372-ps1			Qprt			Olfr1372-ps1			Olfr1372-ps1			Olfr1372-ps1			Olfr1372-ps1
Them4			Them4			Them4			Them4			Them4			Them4			Them4			Adam19			Them4			Them4			Them4			Them4
Lsp1			Lsp1			Lsp1			Lsp1			Lsp1			Lsp1			Lsp1			Olfr1372-ps1			Lsp1			Lsp1			Lsp1			Lsp1
Egr4			Egr4			Egr4			Egr4			Egr4			Egr4			Egr4			Them4			Egr4			Egr4			Egr4			Egr4
Ets2			Ets2			Ets2			Ets2			Ets2			Ets2			Ets2			Lsp1			Ets2			Ets2			Ets2			Ets2
Cd84			Cd84			Cd84			Cd84			Cd84			Cd84			Cd84			Egr4			Cd84			Cd84			Cd84			Cd84
Lars2			Lars2			Lars2			Lars2			Lars2			Lars2			Lars2			Ets2			Lars2			Lars2			Lars2			Lars2
H2-D1			H2-D1			H2-D1			H2-D1			H2-D1			H2-D1			H2-D1			Cd84			H2-D1			H2-D1			H2-D1			H2-D1
Rn18s-rs5			Rn18s-rs5			Rn18s-rs5			Rn18s-rs5			Rn18s-rs5			Rn18s-rs5			Rn18s-rs5			Lars2			Rn18s-rs5			Rn18s-rs5			Rn18s-rs5			Rn18s-rs5
Lcn2			Lcn2			Lcn2			Lcn2			Lcn2			Lcn2			Lcn2			H2-D1			Lcn2			Lcn2			Lcn2			Lcn2
9330154J02Rik			9330154J02Rik			9330154J02Rik			9330154J02Rik			9330154J02Rik			9330154J02Rik			9330154J02Rik			Rn18s-rs5			9330154J02Rik			9330154J02Rik			9330154J02Rik			9330154J02Rik
Slc6a20a			Slc6a20a			Slc6a20a			Slc6a20a			Slc6a20a			Slc6a20a			Slc6a20a			Lcn2			Slc6a20a			Slc6a20a			Slc6a20a			Slc6a20a
Slfn9			Slfn9			Slfn9			Slfn9			Slfn9			Slfn9			Slfn9			9330154J02Rik			Slfn9			Slfn9			Slfn9			Slfn9
Lyz2			Lyz2			Lyz2			Lyz2			Lyz2			Lyz2			Lyz2			Slc6a20a			Lyz2			Lyz2			Lyz2			Lyz2
Rtp4			Rtp4			Rtp4			Rtp4			Rtp4			Rtp4			Rtp4			Slfn9			Rtp4			Rtp4			Rtp4			Rtp4
Ptk2b			Ptk2b			Ptk2b			Ptk2b			Ptk2b			Ptk2b			Ptk2b			Lyz2			Ptk2b			Ptk2b			Ptk2b			Ptk2b
Gm24119			Gm24119			Gm24119			Gm24119			Gm24119			Gm24119			Gm24119			Rtp4			Gm24119			Gm24119			Gm24119			Gm24119
Gm4951			Gm4951			Gm4951			Gm4951			Gm4951			Gm4951			Gm4951			Ptk2b			Gm4951			Gm4951			Gm4951			Gm4951
Ide			Ide			Ide			Ide			Ide			Ide			Ide			Gm24119			Ide			Ide			Ide			Ide
H2-M3			H2-M3			H2-M3			H2-M3			H2-M3			H2-M3			H2-M3			Gm4951			H2-M3			H2-M3			H2-M3			H2-M3
Nxph3			Nxph3			Nxph3			Nxph3			Nxph3			Nxph3			Nxph3			Ide			Nxph3			Nxph3			Nxph3			Nxph3
Cd109			Cd109			Cd109			Cd109			Cd109			Cd109			Cd109			H2-M3			Cd109			Cd109			Cd109			Cd109
Oas1a			Oas1a			Oas1a			Oas1a			Oas1a			Oas1a			Oas1a			Nxph3			Oas1a			Oas1a			Oas1a			Oas1a
Fmo2			Fmo2			Fmo2			Fmo2			Fmo2			Fmo2			Fmo2			Cd109			Fmo2			Fmo2			Fmo2			Fmo2
Cd52			Cd52			Cd52			Cd52			Cd52			Cd52			Cd52			Oas1a			Cd52			Cd52			Cd52			Cd52
Cbr2			Cbr2			Cbr2			Cbr2			Cbr2			Cbr2			Cbr2			Fmo2			Cbr2			Cbr2			Cbr2			Cbr2
Nbl1			Nbl1			Nbl1			Nbl1			Nbl1			Nbl1			Nbl1			Cd52			Nbl1			Nbl1			Nbl1			Nbl1
Cd37			Cd37			Cd37			Cd37			Cd37			Cd37			Cd37			Cbr2			Cd37			Cd37			Cd37			Cd37
H2-DMb1			H2-DMb1			H2-DMb1			H2-DMb1			H2-DMb1			H2-DMb1			H2-DMb1			Nbl1			H2-DMb1			H2-DMb1			H2-DMb1			H2-DMb1
Gm11837			Gm11837			Gm11837			Gm11837			Gm11837			Gm11837			Gm11837			Cd37			Gm11837			Gm11837			Gm11837			Gm11837
Abi3			Abi3			Abi3			Abi3			Abi3			Abi3			Abi3			H2-DMb1			Abi3			Abi3			Abi3			Abi3
9930111J21Rik1			9930111J21Rik1			9930111J21Rik1			9930111J21Rik1			9930111J21Rik1			9930111J21Rik1			9930111J21Rik1			Gm11837			9930111J21Rik1			9930111J21Rik1			9930111J21Rik1			9930111J21Rik1
Slitrk3			Slitrk3			Slitrk3			Slitrk3			Slitrk3			Slitrk3			Slitrk3			Abi3			Slitrk3			Slitrk3			Slitrk3			Slitrk3
Gm15564			Gm15564			Gm15564			Gm15564			Gm15564			Gm15564			Gm15564			9930111J21Rik1			Gm15564			Gm15564			Gm15564			Gm15564
Gm49375			Gm49375			Gm49375			Gm49375			Gm49375			Gm49375			Gm49375			Slitrk3			Gm49375			Gm49375			Gm49375			Gm49375
Prr32			Prr32			Prr32			Prr32			Prr32			Prr32			Prr32			Gm15564			Prr32			Prr32			Prr32			Prr32
Sv2c			Sv2c			Sv2c			Sv2c			Sv2c			Sv2c			Sv2c			Gm49375			Sv2c			Sv2c			Sv2c			Sv2c
Ugt8a			Ugt8a			Ugt8a			Ugt8a			Ugt8a			Ugt8a			Ugt8a			Prr32			Ugt8a			Ugt8a			Ugt8a			Ugt8a
AY036118			AY036118			AY036118			AY036118			AY036118			AY036118			AY036118			Sv2c			AY036118			AY036118			AY036118			AY036118
Cldn11			Cldn11			Cldn11			Cldn11			Cldn11			Cldn11			Cldn11			Ugt8a			Cldn11			Cldn11			Cldn11			Cldn11
Ncan			Ncan			Ncan			Ncan			Ncan			Ncan			Ncan			AY036118			Ncan			Ncan			Ncan			Ncan
																					Cldn11
																					Ncan

## Sheet: CB YvO
Positive regulation of inflammatory response	35		Negative regulation of inflammatory response	19		Interferon-mediated signalling	20		Interleukin-mediated signalling	13		DAMs 2021	37		Microglial Exhaustion	11		Inflammasomes	6		cGAS-STING	3		Tfam-/-	40		LINE1 Derepression	16		TE Regulation	0		H3K9me3 proteome	1
Abcc1	Btk		Abr	Apoe		Adar	Ifih1		Akt1	Csf2rb		4632427E13Rik	Apoe		Ager	Cd274		Aim2	Casp1		Akt1	Ifi204		Abi3bp	Bst2		Bst2	Bst2		Actb			BCLAF1	Crebrf
Adam8	C3		Acod1	Ccn3		Arg1	Ifitm3		C1qtnf4	Egr1		9130401M01Rik	Atf3		Anxa1	Cd72		Casp1	Gsdmd		Aurkb	Irf9		Agrn	Cmpk2		Cxcl10	Cxcl10		Actl6a			CHTOP
Adora2b	Casp1		Acp5	Cd44		Cactin	Igtp		Casp4	Fcer1g		Acaca	Axl		Bcl6	Cd74		Casp4	Naip2		Banf1	Zbp1		Apol9b	Cxcl10		Ifi204	Ifi204		Actl6b			Crebrf
Adora3	Ccl3		Ada	Cst7		Cdc37	Irf1		Cd300lf	Il1a		Ache	Capg		Ccl2	Cd86		Ddx3x	Naip5		Cdk1			Bst2	Dhx58		Ifi27	Ifi27		Ago2			CBX1
Aim2	Csf1r		Adcyap1	Cx3cr1		Cnot7	Irf7		Cd4	Oas2		Adarb1	Ccl3		Ccr2	Clec7a		Dhx33	Naip6		Cgas			Ccl2	Dtx3l		Ifi30	Ifih1		Alkbh5			CBX3
Alox5ap	Ctsc		Adipoq	Fcgr2b		Dcst1	Irgm1		Cebpa	Oasl1		Adck5	Ccl6		Ccr5	Cxcl10		Gsdmd	Pycard		Ifi204			Cmpk2	Gbp2		Ifih1	Ifit1		Arid1a			CBX5
Aoc3	Ctss		Adora1	Gpr17		Dnaja3	Irgm2		Csf2rb	Oasl2		Ank	Cd22		Cd244a	Havcr2		Il18			Irf3			Cxcl10	Gbp3		Ifit1	Ifit2		Arid1b			CCDC137
App	Fcer1g		Adora2a	Igtp		Eif4e2	Isg15		Csf2rb2	Parp14		Ankrd16	Cd52		Cd274	Lag3		Il1b			Irf9			Dhx58	Gbp7		Ifit2	Ifit3		Arid2			CCDC59
Btk	Fcgr3		Ahr	Il20rb		Fadd	Mmp12		Ctr9	Spi1		Apbb2	Cd74		Cd38	Satb1		Naip1			Lyplal1			Dtx3l	H2-Q4		Ifit3	Ifitm3		Atf7ip			CCDC86
C2cd4a	Gprc5b		Alox5	Irgm1		Gigyf2	Nlrc5		Cxcr2	Stat1		Aplp2	Clec7a		Cd72	Stat1		Naip2			Map3k7			Enpep	Ifi35		Ifitm1	Irf5		Atrx			CEBPZ
C2cd4b	Gsdmd		Aoah	Irgm2		Hdac4	Oas1a		Cyld	Stat6		Apoe	Cst7		Cd74	Tirap		Naip5			Nfkb1			Enpp2	Ifi44		Ifitm3	Isg15		Bap1			CHAF1A
C3	H2-D1		Apoa1	Lgals9		Hpx	Oas1b		Egr1	Tirap		Aprt	Ctsz		Cd86			Naip6			Parp1			Gbp2	Ifih1		Ifna1	Mal		Bcl7a			YBX3
Camk2n1	H2-K1		Apoe	Nod2		Ifih1	Oas1c		Fcer1g	Zbp1		Arap2	Cxcl16		Clec7a			Nlrc4			Ppp6c			Gbp3	Ifit1		Ifna2	Mx1		Bcl7b			CUX1
Casp1	H2-Q4		Arnt	Nr1h3		Ifitm1	Oas1g		Fer			Arrdc4	Cybb		Csf1			Nlrp1a			Prkdc			Gbp7	Ifit3		Ifne	Mx2		Bcl7c			DDX17
Casp4	H2-Q6		Ash1l	Ptpn6		Ifitm2	Oas2		Gab1			Asb10	Ftl1		Cxcl10			Nlrp1b			Sting1			H2-Q4	Ifit3b		Irf5	Oas2		Bicra			DDX5
Ccl1	H2-Q7		Bcr	Smpdl3b		Ifitm3	Parp9		Gfi1			Atf3	Glipr1		Entpd1			Nlrp3			Tab1			Helz2	Igtp		Isg15	Stat1		Bicral			EBNA1BP2
Ccl3	H2-T10		C1qtnf3	Tnfrsf1a		Ifitm6	Parp14		Ikbkb			Atp11c	Gng12		Havcr2			Nlrp6			Tbk1			Ifi35	Iigp1		Jak1			Brd4			ERH
Ccl5	H2-T22		C1qtnf12	Tnfrsf1b		Ifitm7	Stat1		Ikbke			Atp6v0c	Gpnmb		Icos			Pycard			Zbp1			Ifi44	Irf7		Mal			Brd7			EXOSC10
Ccl24	H2-T23		Ccn3	Trem2		Ifna1	Trim56		Il11			Atp6v0c-ps2	Gusb		Il2rb						Zdhhc18			Ifih1	Irf9		Mx1			Brd9			FUS
Ccn4	Ifi35		Cd24a			Ifnar1	Zbp1		Il11ra1			Axl	H2-D1		Il33						Zdhhc9			Ifit1	Irgm1		Mx2			Cbx1			FYTTD1
Ccr2	Lgals1		Cd44			Ifnar2			Il11ra2			Baiap2l2	H2-K1		Il7r									Ifit3	Irgm2		Oas2			Cbx3			GATAD2A
Ccr5	Lpl		Cd200			Ifnb1						Bcl2a1b	H2-Q7		Kit									Ifit3b	Isg15		Rigi			Cbx5			GATAD2B
Ccr7	Nmi		Cd200l1			Ifng			Il12a			Birc5	Ifi204		Klf4									Igtp	Lgals3bp		Stat1			Cdk2ap1			Nop53
Cd24a	Nupr1		Cd200l2			Ifngr1			Il12b			Bola2	Ifi27l2a		Lag3									Iigp1	Mx2		Stat3			Cdk2ap2			HDLBP
Cd28	Pik3cg		Cd200r1			Ifngr2			Il12rb1			Cadm1	Ifit1		Ly96									Irf7	Oas1a		Tnfsf10			Chaf1a			HMGA1
Cd47	Plcg2		Cd276			Igtp			Il12rb2			Capg	Ifit2		Myd88									Irf9	Oasl2					Chaf1b			HNRNPA2B1
Cd81	Pycard		Cdh5			Ikbke			Il15			Ccdc88a	Itgax		Nfkb1									Irgm1	Parp10					Chd3			HNRNPK
Cebpa	Snca		Chrna7			Irak1			Il15ra			Ccl3	Lgals3bp		P2rx7									Irgm2	Parp14					Chd4			HNRNPL
Cebpb	Tlr2		Cst7			Irf1			Il17a			Ccl4	Lpl		Pdcd1									Isg15	Parp9					Chd5			HP1BP3
Clock	Tlr4		Ctla2a			Irf3			Il17f			Ccl6	Lyz2		Prickle1									Lgals3bp	Psmb8					Ctcf			KHDRBS1
Cnr1	Tlr6		Cx3cr1			Irf7			Il17ra			Cd22	Nlrc5		S100a8									Mx2	Rnf213					Daxx			KHDRBS3
Csf1r	Tnfrsf1a		Cxcl17			Irgm1			Il17rc			Cd34	Npc2		Satb1									Oas1a	Rtp4					Ddx4			LLPH
Ctsc	Trem2		Cyld			Irgm2			Il18			Cd52	Slamf9		Sirpa									Oasl2	Slfn2					Dgcr8			LOXL1
Ctss	Ttbk1		Cyp19a1			Isg15			Il18r1			Cd63	St8sia6		Socs3									Parp10	Stat1					Dhx9			LOXL2
Ddt	Zbp1		Dusp10			Jak1			Il18rap			Cd74	Thbs1		Spp1									Parp14	Tgtp1					Dicer1			LTBP2
Dhx9			Elf4			Jak2			Il1a			Cd83	Tspo		Stat1									Parp9	Trim30a					Dnmt1			MATR3
Ets1			Enpp3			Lsm14a			Il1b			Cd9	Tyrobp		Tcf7									Psmb8	Trim30d					Dnmt3a			MBD3
Fabp4			Ets1			Mavs			Il1r1			Cdc42ep3			Ticam1									Rigi	Usp18					Dnmt3b			MBNL1
Fcer1a			Extl3			Med1			Il1r2			Cdca8			Ticam2									Rnf213	Xaf1					Dnmt3c			MPHOSPH10
Fcer1g			Fcgr2b			Mettl3			Il1rap			Ch25h			Tirap									Rtp4	Zbp1					Dnmt3l			MRTO4
Fcgr1			Fem1a			Mmp12			Il1rl1			Chst1												Sim2						Dpf1			MYBBP1A
Fcgr3			Fem1al			Mul1			Il1rn			Clec7a												Slfn2						Dpf2			MYEF2
Fem1a			Ffar4			Myd88			Il2			Cops9												Stat1						Dpf3			NCOA5
Ffar2			Fndc4			Nlrc5			Il2ra			Cox6a2												Stat2						Drosha			NCOA7
Ffar3			Foxf1			Oas1a			Il2rb			Cox6c												Tgtp1						Ehmt1			NONO
Gpr4			Foxp3			Oas1b			Il2rg			Cpd												Trim30a						Ehmt2			PES1
Gprc5b			Fpr2			Oas1c			Il3			Crip1												Trim30d						Elp3			PHB
Gpsm3			Fpr3			Oas1d			Il33			Crlf2												Usp18						Fto			PIAS2
Grn			Fpr-rs3			Oas1e			Il34			Csf1												Xaf1						Gatad2a			POLDIP3
Gsdmd			Fpr-rs4			Oas1f			Il3ra			Csf2ra												Zbp1						Gatad2b			PPAN
H2-D1			Fpr-rs6			Oas1g			Il4			Cst7																		Gtsf1			PPHLN1
H2-K1			Fpr-rs7			Oas1h			Il4ra			Ctsb																		H3f3a			PRDM15
H2-M1			Fxr1			Oas2			Il5			Ctsz																		H3f3b			PRMT1
H2-M2			Gata3			Oas3			Il5ra			Cxcl16																		H3f3c			PRRX2
H2-M5			Ghrl			Otop1			Il6			Cybb																		Hdac1			PTBP1
H2-M9			Ghsr			Parp9			Il6ra			Dhcr7																		Hdac2			QKI
H2-M10.1			Git1			Parp14			Il6st			Dhx32																		Hinfp			RBM12B1
H2-M10.2			Gper1			Pparg			Il9r			Dnajc15																		Kmt5b			RBM15
H2-M10.3			Gpr17			Ptpn2			Irak1			Dpcd																		Kmt5c			RBM26
H2-M10.4			Gpr31b			Rbm47			Irak2			Dpp7																		Lig1			RBM6
H2-M10.5			Gps2			Rfpl4b			Irak3			Dusp3																		Mbd2			RBMX
H2-M10.6			Gpx1			Rnf185			Irak4			Echs1																		Mbd3			RBMXL1
H2-M11			Gpx2			Samhd1			Jak1			Egr2																		Mbd5			RELA
H2-Q1			Grn			Sin3a			Jak2			Ell2																		Mbd6			RIF1
H2-Q2			Gstp1			Smim30			Jak3			Enpp1																		Mettl14			RPF1
H2-Q4			Hamp			Stat1			Lyn			Enpp2																		Mettl16			RPF2
H2-Q6			Hgf			Stat2			Map3k7			Ero1b																		Mettl3			RPS19BP1
H2-Q7			Ier3			Sting1			Mapk3			Etl4																		Morc1			SAFB
H2-Q10			Igf1			Tbk1			Mir301			Fam20c																		Morc2a			SAFB2
H2-T3			Igtp			Trex1			Myd88			Fcgr4																		Morc2b			SETDB1
H2-T9			Il2			Trim6			Nfkbia			Fgl2																		Morc3			SFPQ
H2-T10			Il2ra			Trim41			Nlrp6			Frrs1																		Mov10l1			TRA2B
H2-T22			Il4			Trim56			Notch1			Fth1																		Mphosph8			SLTM
H2-T23			Il10			Trim65			Oas2			Ftl1																		Mta1			SUMO2
Hyal2			Il10ra			Trp53			Oasl1			Fxyd5																		Mta2			SUV39H1
Ido1			Il12b			Ttll12			Oasl2			Fxyd6																		Mta3			SUV39H2
Ifi35			Il13			Txk			Otud4			Gfus																		Mtr4			SUZ12
Ifng			Il17a			Tyk2			Parp14			Glipr1																		Nsun2			TAF15
Ighg1			Il20rb			Ube2k			Pdgfb			Gm15772																		Ogt			TARDBP
Ighg2b			Il22			Usp27x			Pik3r1			Gnas																		Pabpn1			TCF25
Il1b			Il22ra1			Usp29			Plcb1			Gng12																		Pbrm1			THRAP3
Il1rl1			Il22ra2			Wnt5a			Ptpn2			Got1																		Phf10			TRA2A
Il6			Il33			Ythdf2			Rela			Gpnmb																		Piwil1			TRIM28
Il16			Ins1			Ythdf3			Ripk1			Gpr65																		Piwil2			UBE2I
Il17ra			Ins2			Zbp1			Rps6ka4			Gusb																		Piwil4			UTP3
Il17rb			Irgm1						Rps6ka5			H2-D1																		Pld6			WDR46
Il18			Irgm2						Smad4			H2-K1																		Pphln1			XRN2
Il33			Isl1						Spi1			H2-Q7																		Pspc1			YBX1
Kars1			Krt1						Src			Hif1a																		Rbbp4			YLPM1
Kcnn4			Ldlr						Srsf1			Ifi204																		Rbbp7			YTHDC1
Lbp			Lgals9						St18			Ifi27l2a																		Rbm26			YY2
Ldlr			Lpcat3						Stat1			Ifi27l2b																		Rbm27			ZC3H13
Lgals1			Lrfn5						Stat3			Ifit1																		Rbm7			Zfp207
Lgals2			Macir						Stat4			Ifit2																		Safb			Zfp326
Lilra5			Mdk						Stat5a			Igf1																		Safb2			Zfp438
Lpl			Mefv						Stat6			Il1b																		Setdb1			Zfp512
Lrrk2			Metrnl						Syk			Ildr2																		Setdb2			Zfp598
Lta			Mfhas1						Ticam2			Itgax																		Sin3a			Zfp622
Mdk			Mir147						Tirap			Kcnj2																		Sinhcaf			Zfp638
Mefv			Mir7578						Tnip2			Lgals3bp																		Sirt1
Mmp8			Mkrn2						Tollip			Lgi2																		Sirt6
Napepld			Muc19						Traf2			Lmbrd2																		Sltm
Nfkbia			Mvk						Traf3ip2			Lpl																		Smarca2
Nfkbiz			Ndfip1						Traf5			Lyz2																		Smarca4
Ninj1			Nfkb1						Traf6			Lyzl4																		Smarcb1
Nkg7			Nlrc3						Trim32			Mamdc2																		Smarcc1
Nlrp1a			Nlrp3						Tut4			Mblac2																		Smarcc2
Nlrp1b			Nlrp6						Tyk2			Mif																		Smarcd1
Nlrp3			Nlrp12						Usp25			Mir682																		Smarcd2
Nlrp6			Nlrx1						Vrk2			Mrpl27																		Smarcd3
Nlrp10			Nod2						Yap1			Mt1																		Smarce1
Nmi			Npy						Zbp1			Myo1e																		Spen
Nppa			Npy5r									Naglu																		Spocd1
Npy5r			Nr1d1									Nat8l																		Ss18
Nupr1			Nr1d2									Ncbp2as2																		Ss18l1
Osm			Nr1h3									Nceh1																		Ss18l2
Park7			Nr1h4									Ndufv3																		Sumo2
Pdcd4			Nr1h5									Nlrc5																		Suv39h1
Pde2a			Nt5e									Npc2																		Suv39h2
Pde5a			Otulin									Pkib																		Tarbp2
Pik3cg			Pbk									Pld3																		Tasor
Pla2g3			Pdcd10									Pogk																		Tasor2
Plcg2			Pf4									Psat1																		Tet1
Prkca			Pglyrp1									Pycrl																		Tet2
Ptger3			Pla2g5									Ramp1																		Tex15
Ptger4			Pla2g10									Rap2b																		Tnrc18
Ptgs2			Ppara									Rpl23																		Trim28
Pycard			Ppard									Rps18																		Uhrf1
Ripk1			Pparg									Rras																		Uhrf2
Rps19			Proc									S1pr1																		Wiz
S100a8			Psma1									Scd2																		Wtap
S100a9			Psmb4									Scpep1																		Ytdc1
Serpine1			Ptger4									Sdc3																		Ytdc2
Setd4			Ptgis									Serpine2																		Ytdfh2
Snca			Ptpn2									Slamf9																		Ytdhf3
Snx4			Ptpn6									Slc1a2																		Ythdf1
Stap1			Rabgef1									Slc23a2																		Yy1
Stat5a			Rb1									Slc44a1																		Zc3h13
Stat5b			Reg3g									Speg																		Zc3h3
Sucnr1			Rora									Spp1																		Zcchc8
Tac1			Rps19									Srebf2																		Zfc3h1
Tafa3			Selenos									Ssh1
Tgfb1			Sharpin									Ssr4
Tlr2			Siglece									St14
Tlr4			Siglecg									St8sia6
Tlr6			Sirpa									Stim2
Tnf			Slamf8									Sulf2
Tnfrsf1a			Slc39a8									Syngr1
Tnfrsf11a			Smad3									Tbcd
Tnfsf4			Smpdl3b									Thbs1
Tnfsf11			Socs3									Tmem154
Tnfsf18			Socs5									Tpd52
Tnip1			Sod1									Trim32
Tradd			Spn									Tspo
Trem2			Stat3									Ttf1
Trpv4			Syt11									Ttr
Tslp			Tafa3									Tuba1c
Ttbk1			Tff2									Tyrobp
Vamp8			Tnfaip3									Upp2
Wnt5a			Tnfaip6									Zdhhc21
Zbp1			Tnfaip8l2									Zfas1
Zp3			Tnfrsf1a									Zfp692
			Tnfrsf1b
			Trem2
			Trim45
			Trim65
			Tyro3
			Uaca
			Vps35
			Wfdc1
			Zfp36
C4b			C4b			C4b			C4b			C4b			C4b			C4b						C4b			C4b			C4b			C4b
Clec7a			Clec7a			Clec7a			Clec7a			Clec7a			Clec7a			Clec7a						Clec7a			Clec7a			Clec7a			Clec7a
Mpeg1			Mpeg1			Mpeg1			Mpeg1			Mpeg1			Mpeg1			Mpeg1			C4b			Mpeg1			Mpeg1			Mpeg1			Mpeg1
Ctss			Ctss			Ctss			Ctss			Ctss			Ctss			Ctss			Clec7a			Ctss			Ctss			Ctss			Ctss
Gpnmb			Gpnmb			Gpnmb			Gpnmb			Gpnmb			Gpnmb			Gpnmb			Mpeg1			Gpnmb			Gpnmb			Gpnmb			Gpnmb
Trem2			Trem2			Trem2			Trem2			Trem2			Trem2			Trem2			Ctss			Trem2			Trem2			Trem2			Trem2
Lyz2			Lyz2			Lyz2			Lyz2			Lyz2			Lyz2			Lyz2			Gpnmb			Lyz2			Lyz2			Lyz2			Lyz2
Lgals3			Lgals3			Lgals3			Lgals3			Lgals3			Lgals3			Lgals3			Trem2			Lgals3			Lgals3			Lgals3			Lgals3
Ide			Ide			Ide			Ide			Ide			Ide			Ide			Lyz2			Ide			Ide			Ide			Ide
Ifi27			Ifi27			Ifi27			Ifi27			Ifi27			Ifi27			Ifi27			Lgals3			Ifi27			Ifi27			Ifi27			Ifi27
C1qc			C1qc			C1qc			C1qc			C1qc			C1qc			C1qc			Ide			C1qc			C1qc			C1qc			C1qc
Trim30d			Trim30d			Trim30d			Trim30d			Trim30d			Trim30d			Trim30d			Ifi27			Trim30d			Trim30d			Trim30d			Trim30d
Cybb			Cybb			Cybb			Cybb			Cybb			Cybb			Cybb			C1qc			Cybb			Cybb			Cybb			Cybb
Zc3hav1			Zc3hav1			Zc3hav1			Zc3hav1			Zc3hav1			Zc3hav1			Zc3hav1			Trim30d			Zc3hav1			Zc3hav1			Zc3hav1			Zc3hav1
Lgals3bp			Lgals3bp			Lgals3bp			Lgals3bp			Lgals3bp			Lgals3bp			Lgals3bp			Cybb			Lgals3bp			Lgals3bp			Lgals3bp			Lgals3bp
Itgax			Itgax			Itgax			Itgax			Itgax			Itgax			Itgax			Zc3hav1			Itgax			Itgax			Itgax			Itgax
Oasl2			Oasl2			Oasl2			Oasl2			Oasl2			Oasl2			Oasl2			Lgals3bp			Oasl2			Oasl2			Oasl2			Oasl2
C1qa			C1qa			C1qa			C1qa			C1qa			C1qa			C1qa			Itgax			C1qa			C1qa			C1qa			C1qa
Tyrobp			Tyrobp			Tyrobp			Tyrobp			Tyrobp			Tyrobp			Tyrobp			Oasl2			Tyrobp			Tyrobp			Tyrobp			Tyrobp
Irgm1			Irgm1			Irgm1			Irgm1			Irgm1			Irgm1			Irgm1			C1qa			Irgm1			Irgm1			Irgm1			Irgm1
Ostn			Ostn			Ostn			Ostn			Ostn			Ostn			Ostn			Tyrobp			Ostn			Ostn			Ostn			Ostn
Itgb2			Itgb2			Itgb2			Itgb2			Itgb2			Itgb2			Itgb2			Irgm1			Itgb2			Itgb2			Itgb2			Itgb2
Slfn8			Slfn8			Slfn8			Slfn8			Slfn8			Slfn8			Slfn8			Ostn			Slfn8			Slfn8			Slfn8			Slfn8
C1qb			C1qb			C1qb			C1qb			C1qb			C1qb			C1qb			Itgb2			C1qb			C1qb			C1qb			C1qb
Ptprc			Ptprc			Ptprc			Ptprc			Ptprc			Ptprc			Ptprc			Slfn8			Ptprc			Ptprc			Ptprc			Ptprc
Cd84			Cd84			Cd84			Cd84			Cd84			Cd84			Cd84			C1qb			Cd84			Cd84			Cd84			Cd84
Ifit3b			Ifit3b			Ifit3b			Ifit3b			Ifit3b			Ifit3b			Ifit3b			Ptprc			Ifit3b			Ifit3b			Ifit3b			Ifit3b
B2m			B2m			B2m			B2m			B2m			B2m			B2m			Cd84			B2m			B2m			B2m			B2m
Abca8a			Abca8a			Abca8a			Abca8a			Abca8a			Abca8a			Abca8a			Ifit3b			Abca8a			Abca8a			Abca8a			Abca8a
Ifit1			Ifit1			Ifit1			Ifit1			Ifit1			Ifit1			Ifit1			B2m			Ifit1			Ifit1			Ifit1			Ifit1
Gbp6			Gbp6			Gbp6			Gbp6			Gbp6			Gbp6			Gbp6			Abca8a			Gbp6			Gbp6			Gbp6			Gbp6
Ddx58			Ddx58			Ddx58			Ddx58			Ddx58			Ddx58			Ddx58			Ifit1			Ddx58			Ddx58			Ddx58			Ddx58
Oas1b			Oas1b			Oas1b			Oas1b			Oas1b			Oas1b			Oas1b			Gbp6			Oas1b			Oas1b			Oas1b			Oas1b
Trim30a			Trim30a			Trim30a			Trim30a			Trim30a			Trim30a			Trim30a			Ddx58			Trim30a			Trim30a			Trim30a			Trim30a
Nlrc5			Nlrc5			Nlrc5			Nlrc5			Nlrc5			Nlrc5			Nlrc5			Oas1b			Nlrc5			Nlrc5			Nlrc5			Nlrc5
Ifi204			Ifi204			Ifi204			Ifi204			Ifi204			Ifi204			Ifi204			Trim30a			Ifi204			Ifi204			Ifi204			Ifi204
Ifit3			Ifit3			Ifit3			Ifit3			Ifit3			Ifit3			Ifit3			Nlrc5			Ifit3			Ifit3			Ifit3			Ifit3
Ly9			Ly9			Ly9			Ly9			Ly9			Ly9			Ly9			Ifi204			Ly9			Ly9			Ly9			Ly9
Usp18			Usp18			Usp18			Usp18			Usp18			Usp18			Usp18			Ifit3			Usp18			Usp18			Usp18			Usp18
Cd68			Cd68			Cd68			Cd68			Cd68			Cd68			Cd68			Ly9			Cd68			Cd68			Cd68			Cd68
Col1a1			Col1a1			Col1a1			Col1a1			Col1a1			Col1a1			Col1a1			Usp18			Col1a1			Col1a1			Col1a1			Col1a1
Dock2			Dock2			Dock2			Dock2			Dock2			Dock2			Dock2			Cd68			Dock2			Dock2			Dock2			Dock2
Hvcn1			Hvcn1			Hvcn1			Hvcn1			Hvcn1			Hvcn1			Hvcn1			Col1a1			Hvcn1			Hvcn1			Hvcn1			Hvcn1
H2-K1			H2-K1			H2-K1			H2-K1			H2-K1			H2-K1			H2-K1			Dock2			H2-K1			H2-K1			H2-K1			H2-K1
Tlr2			Tlr2			Tlr2			Tlr2			Tlr2			Tlr2			Tlr2			Hvcn1			Tlr2			Tlr2			Tlr2			Tlr2
Gfap			Gfap			Gfap			Gfap			Gfap			Gfap			Gfap			H2-K1			Gfap			Gfap			Gfap			Gfap
Parp14			Parp14			Parp14			Parp14			Parp14			Parp14			Parp14			Tlr2			Parp14			Parp14			Parp14			Parp14
Adgre1			Adgre1			Adgre1			Adgre1			Adgre1			Adgre1			Adgre1			Gfap			Adgre1			Adgre1			Adgre1			Adgre1
Bst2			Bst2			Bst2			Bst2			Bst2			Bst2			Bst2			Parp14			Bst2			Bst2			Bst2			Bst2
Ifih1			Ifih1			Ifih1			Ifih1			Ifih1			Ifih1			Ifih1			Adgre1			Ifih1			Ifih1			Ifih1			Ifih1
Casp1			Casp1			Casp1			Casp1			Casp1			Casp1			Casp1			Bst2			Casp1			Casp1			Casp1			Casp1
Gbp3			Gbp3			Gbp3			Gbp3			Gbp3			Gbp3			Gbp3			Ifih1			Gbp3			Gbp3			Gbp3			Gbp3
Ifi27l2a			Ifi27l2a			Ifi27l2a			Ifi27l2a			Ifi27l2a			Ifi27l2a			Ifi27l2a			Casp1			Ifi27l2a			Ifi27l2a			Ifi27l2a			Ifi27l2a
Col23a1			Col23a1			Col23a1			Col23a1			Col23a1			Col23a1			Col23a1			Gbp3			Col23a1			Col23a1			Col23a1			Col23a1
Ddx60			Ddx60			Ddx60			Ddx60			Ddx60			Ddx60			Ddx60			Ifi27l2a			Ddx60			Ddx60			Ddx60			Ddx60
Tnc			Tnc			Tnc			Tnc			Tnc			Tnc			Tnc			Col23a1			Tnc			Tnc			Tnc			Tnc
Irf7			Irf7			Irf7			Irf7			Irf7			Irf7			Irf7			Ddx60			Irf7			Irf7			Irf7			Irf7
Serping1			Serping1			Serping1			Serping1			Serping1			Serping1			Serping1			Tnc			Serping1			Serping1			Serping1			Serping1
Cst7			Cst7			Cst7			Cst7			Cst7			Cst7			Cst7			Irf7			Cst7			Cst7			Cst7			Cst7
Plag1			Plag1			Plag1			Plag1			Plag1			Plag1			Plag1			Serping1			Plag1			Plag1			Plag1			Plag1
Rnf213			Rnf213			Rnf213			Rnf213			Rnf213			Rnf213			Rnf213			Cst7			Rnf213			Rnf213			Rnf213			Rnf213
Zfp57			Zfp57			Zfp57			Zfp57			Zfp57			Zfp57			Zfp57			Plag1			Zfp57			Zfp57			Zfp57			Zfp57
Sqor			Sqor			Sqor			Sqor			Sqor			Sqor			Sqor			Rnf213			Sqor			Sqor			Sqor			Sqor
9630013A20Rik			9630013A20Rik			9630013A20Rik			9630013A20Rik			9630013A20Rik			9630013A20Rik			9630013A20Rik			Zfp57			9630013A20Rik			9630013A20Rik			9630013A20Rik			9630013A20Rik
Eif2ak2			Eif2ak2			Eif2ak2			Eif2ak2			Eif2ak2			Eif2ak2			Eif2ak2			Sqor			Eif2ak2			Eif2ak2			Eif2ak2			Eif2ak2
Igtp			Igtp			Igtp			Igtp			Igtp			Igtp			Igtp			9630013A20Rik			Igtp			Igtp			Igtp			Igtp
Parp9			Parp9			Parp9			Parp9			Parp9			Parp9			Parp9			Eif2ak2			Parp9			Parp9			Parp9			Parp9
Pcdhb14			Pcdhb14			Pcdhb14			Pcdhb14			Pcdhb14			Pcdhb14			Pcdhb14			Igtp			Pcdhb14			Pcdhb14			Pcdhb14			Pcdhb14
Stat1			Stat1			Stat1			Stat1			Stat1			Stat1			Stat1			Parp9			Stat1			Stat1			Stat1			Stat1
Tent5c			Tent5c			Tent5c			Tent5c			Tent5c			Tent5c			Tent5c			Pcdhb14			Tent5c			Tent5c			Tent5c			Tent5c
Ntf3			Ntf3			Ntf3			Ntf3			Ntf3			Ntf3			Ntf3			Stat1			Ntf3			Ntf3			Ntf3			Ntf3
Btaf1			Btaf1			Btaf1			Btaf1			Btaf1			Btaf1			Btaf1			Tent5c			Btaf1			Btaf1			Btaf1			Btaf1
Gbp10			Gbp10			Gbp10			Gbp10			Gbp10			Gbp10			Gbp10			Ntf3			Gbp10			Gbp10			Gbp10			Gbp10
Mcm6			Mcm6			Mcm6			Mcm6			Mcm6			Mcm6			Mcm6			Btaf1			Mcm6			Mcm6			Mcm6			Mcm6
C3ar1			C3ar1			C3ar1			C3ar1			C3ar1			C3ar1			C3ar1			Gbp10			C3ar1			C3ar1			C3ar1			C3ar1
Gm4951			Gm4951			Gm4951			Gm4951			Gm4951			Gm4951			Gm4951			Mcm6			Gm4951			Gm4951			Gm4951			Gm4951
Serpina3n			Serpina3n			Serpina3n			Serpina3n			Serpina3n			Serpina3n			Serpina3n			C3ar1			Serpina3n			Serpina3n			Serpina3n			Serpina3n
Capg			Capg			Capg			Capg			Capg			Capg			Capg			Gm4951			Capg			Capg			Capg			Capg
Mkrn3			Mkrn3			Mkrn3			Mkrn3			Mkrn3			Mkrn3			Mkrn3			Serpina3n			Mkrn3			Mkrn3			Mkrn3			Mkrn3
Myo1f			Myo1f			Myo1f			Myo1f			Myo1f			Myo1f			Myo1f			Capg			Myo1f			Myo1f			Myo1f			Myo1f
3222401L13Rik			3222401L13Rik			3222401L13Rik			3222401L13Rik			3222401L13Rik			3222401L13Rik			3222401L13Rik			Mkrn3			3222401L13Rik			3222401L13Rik			3222401L13Rik			3222401L13Rik
Nectin3			Nectin3			Nectin3			Nectin3			Nectin3			Nectin3			Nectin3			Myo1f			Nectin3			Nectin3			Nectin3			Nectin3
Hexb			Hexb			Hexb			Hexb			Hexb			Hexb			Hexb			3222401L13Rik			Hexb			Hexb			Hexb			Hexb
Fcgr2b			Fcgr2b			Fcgr2b			Fcgr2b			Fcgr2b			Fcgr2b			Fcgr2b			Nectin3			Fcgr2b			Fcgr2b			Fcgr2b			Fcgr2b
Cd22			Cd22			Cd22			Cd22			Cd22			Cd22			Cd22			Hexb			Cd22			Cd22			Cd22			Cd22
Cd52			Cd52			Cd52			Cd52			Cd52			Cd52			Cd52			Fcgr2b			Cd52			Cd52			Cd52			Cd52
Ctsz			Ctsz			Ctsz			Ctsz			Ctsz			Ctsz			Ctsz			Cd22			Ctsz			Ctsz			Ctsz			Ctsz
Trim34a			Trim34a			Trim34a			Trim34a			Trim34a			Trim34a			Trim34a			Cd52			Trim34a			Trim34a			Trim34a			Trim34a
Rtp4			Rtp4			Rtp4			Rtp4			Rtp4			Rtp4			Rtp4			Ctsz			Rtp4			Rtp4			Rtp4			Rtp4
Oas1a			Oas1a			Oas1a			Oas1a			Oas1a			Oas1a			Oas1a			Trim34a			Oas1a			Oas1a			Oas1a			Oas1a
Efemp1			Efemp1			Efemp1			Efemp1			Efemp1			Efemp1			Efemp1			Rtp4			Efemp1			Efemp1			Efemp1			Efemp1
Ptpn6			Ptpn6			Ptpn6			Ptpn6			Ptpn6			Ptpn6			Ptpn6			Oas1a			Ptpn6			Ptpn6			Ptpn6			Ptpn6
Cd109			Cd109			Cd109			Cd109			Cd109			Cd109			Cd109			Efemp1			Cd109			Cd109			Cd109			Cd109
Trim12a			Trim12a			Trim12a			Trim12a			Trim12a			Trim12a			Trim12a			Ptpn6			Trim12a			Trim12a			Trim12a			Trim12a
Tap2			Tap2			Tap2			Tap2			Tap2			Tap2			Tap2			Cd109			Tap2			Tap2			Tap2			Tap2
Cd274			Cd274			Cd274			Cd274			Cd274			Cd274			Cd274			Trim12a			Cd274			Cd274			Cd274			Cd274
Slc11a1			Slc11a1			Slc11a1			Slc11a1			Slc11a1			Slc11a1			Slc11a1			Tap2			Slc11a1			Slc11a1			Slc11a1			Slc11a1
Casp12			Casp12			Casp12			Casp12			Casp12			Casp12			Casp12			Cd274			Casp12			Casp12			Casp12			Casp12
Irf8			Irf8			Irf8			Irf8			Irf8			Irf8			Irf8			Slc11a1			Irf8			Irf8			Irf8			Irf8
H2-T23			H2-T23			H2-T23			H2-T23			H2-T23			H2-T23			H2-T23			Casp12			H2-T23			H2-T23			H2-T23			H2-T23
Cx3cr1			Cx3cr1			Cx3cr1			Cx3cr1			Cx3cr1			Cx3cr1			Cx3cr1			Irf8			Cx3cr1			Cx3cr1			Cx3cr1			Cx3cr1
Gvin-ps7			Gvin-ps7			Gvin-ps7			Gvin-ps7			Gvin-ps7			Gvin-ps7			Gvin-ps7			H2-T23			Gvin-ps7			Gvin-ps7			Gvin-ps7			Gvin-ps7
Nckap1l			Nckap1l			Nckap1l			Nckap1l			Nckap1l			Nckap1l			Nckap1l			Cx3cr1			Nckap1l			Nckap1l			Nckap1l			Nckap1l
Slfn9			Slfn9			Slfn9			Slfn9			Slfn9			Slfn9			Slfn9			Gvin-ps7			Slfn9			Slfn9			Slfn9			Slfn9
Nid1			Nid1			Nid1			Nid1			Nid1			Nid1			Nid1			Nckap1l			Nid1			Nid1			Nid1			Nid1
Dtx3l			Dtx3l			Dtx3l			Dtx3l			Dtx3l			Dtx3l			Dtx3l			Slfn9			Dtx3l			Dtx3l			Dtx3l			Dtx3l
Lilrb4a			Lilrb4a			Lilrb4a			Lilrb4a			Lilrb4a			Lilrb4a			Lilrb4a			Nid1			Lilrb4a			Lilrb4a			Lilrb4a			Lilrb4a
Cd48			Cd48			Cd48			Cd48			Cd48			Cd48			Cd48			Dtx3l			Cd48			Cd48			Cd48			Cd48
H2-D1			H2-D1			H2-D1			H2-D1			H2-D1			H2-D1			H2-D1			Lilrb4a			H2-D1			H2-D1			H2-D1			H2-D1
Cacna1e			Cacna1e			Cacna1e			Cacna1e			Cacna1e			Cacna1e			Cacna1e			Cd48			Cacna1e			Cacna1e			Cacna1e			Cacna1e
Rem2			Rem2			Rem2			Rem2			Rem2			Rem2			Rem2			H2-D1			Rem2			Rem2			Rem2			Rem2
Gbp7			Gbp7			Gbp7			Gbp7			Gbp7			Gbp7			Gbp7			Cacna1e			Gbp7			Gbp7			Gbp7			Gbp7
Necab3			Necab3			Necab3			Necab3			Necab3			Necab3			Necab3			Rem2			Necab3			Necab3			Necab3			Necab3
Sstr3			Sstr3			Sstr3			Sstr3			Sstr3			Sstr3			Sstr3			Gbp7			Sstr3			Sstr3			Sstr3			Sstr3
Eya4			Eya4			Eya4			Eya4			Eya4			Eya4			Eya4			Necab3			Eya4			Eya4			Eya4			Eya4
Naip2			Naip2			Naip2			Naip2			Naip2			Naip2			Naip2			Sstr3			Naip2			Naip2			Naip2			Naip2
Ppl			Ppl			Ppl			Ppl			Ppl			Ppl			Ppl			Eya4			Ppl			Ppl			Ppl			Ppl
Gabra2			Gabra2			Gabra2			Gabra2			Gabra2			Gabra2			Gabra2			Naip2			Gabra2			Gabra2			Gabra2			Gabra2
Plek			Plek			Plek			Plek			Plek			Plek			Plek			Ppl			Plek			Plek			Plek			Plek
Fgfbp3			Fgfbp3			Fgfbp3			Fgfbp3			Fgfbp3			Fgfbp3			Fgfbp3			Gabra2			Fgfbp3			Fgfbp3			Fgfbp3			Fgfbp3
Golga7b			Golga7b			Golga7b			Golga7b			Golga7b			Golga7b			Golga7b			Plek			Golga7b			Golga7b			Golga7b			Golga7b
Gm5141			Gm5141			Gm5141			Gm5141			Gm5141			Gm5141			Gm5141			Fgfbp3			Gm5141			Gm5141			Gm5141			Gm5141
Lpl			Lpl			Lpl			Lpl			Lpl			Lpl			Lpl			Golga7b			Lpl			Lpl			Lpl			Lpl
Fcer1g			Fcer1g			Fcer1g			Fcer1g			Fcer1g			Fcer1g			Fcer1g			Gm5141			Fcer1g			Fcer1g			Fcer1g			Fcer1g
Irf9			Irf9			Irf9			Irf9			Irf9			Irf9			Irf9			Lpl			Irf9			Irf9			Irf9			Irf9
A530053G22Rik			A530053G22Rik			A530053G22Rik			A530053G22Rik			A530053G22Rik			A530053G22Rik			A530053G22Rik			Fcer1g			A530053G22Rik			A530053G22Rik			A530053G22Rik			A530053G22Rik
Spp2			Spp2			Spp2			Spp2			Spp2			Spp2			Spp2			Irf9			Spp2			Spp2			Spp2			Spp2
Trim12c			Trim12c			Trim12c			Trim12c			Trim12c			Trim12c			Trim12c			A530053G22Rik			Trim12c			Trim12c			Trim12c			Trim12c
Gbp9			Gbp9			Gbp9			Gbp9			Gbp9			Gbp9			Gbp9			Spp2			Gbp9			Gbp9			Gbp9			Gbp9
Nr3c2			Nr3c2			Nr3c2			Nr3c2			Nr3c2			Nr3c2			Nr3c2			Trim12c			Nr3c2			Nr3c2			Nr3c2			Nr3c2
Pcdhb9			Pcdhb9			Pcdhb9			Pcdhb9			Pcdhb9			Pcdhb9			Pcdhb9			Gbp9			Pcdhb9			Pcdhb9			Pcdhb9			Pcdhb9
Mmp12			Mmp12			Mmp12			Mmp12			Mmp12			Mmp12			Mmp12			Nr3c2			Mmp12			Mmp12			Mmp12			Mmp12
Ifi213			Ifi213			Ifi213			Ifi213			Ifi213			Ifi213			Ifi213			Pcdhb9			Ifi213			Ifi213			Ifi213			Ifi213
Psmb8			Psmb8			Psmb8			Psmb8			Psmb8			Psmb8			Psmb8			Mmp12			Psmb8			Psmb8			Psmb8			Psmb8
Mx2			Mx2			Mx2			Mx2			Mx2			Mx2			Mx2			Ifi213			Mx2			Mx2			Mx2			Mx2
Samd9l			Samd9l			Samd9l			Samd9l			Samd9l			Samd9l			Samd9l			Psmb8			Samd9l			Samd9l			Samd9l			Samd9l
H2-Q4			H2-Q4			H2-Q4			H2-Q4			H2-Q4			H2-Q4			H2-Q4			Mx2			H2-Q4			H2-Q4			H2-Q4			H2-Q4
Tor3a			Tor3a			Tor3a			Tor3a			Tor3a			Tor3a			Tor3a			Samd9l			Tor3a			Tor3a			Tor3a			Tor3a
Tlr13			Tlr13			Tlr13			Tlr13			Tlr13			Tlr13			Tlr13			H2-Q4			Tlr13			Tlr13			Tlr13			Tlr13
Col1a2			Col1a2			Col1a2			Col1a2			Col1a2			Col1a2			Col1a2			Tor3a			Col1a2			Col1a2			Col1a2			Col1a2
AU020206			AU020206			AU020206			AU020206			AU020206			AU020206			AU020206			Tlr13			AU020206			AU020206			AU020206			AU020206
Clec5a			Clec5a			Clec5a			Clec5a			Clec5a			Clec5a			Clec5a			Col1a2			Clec5a			Clec5a			Clec5a			Clec5a
Pcdhb11			Pcdhb11			Pcdhb11			Pcdhb11			Pcdhb11			Pcdhb11			Pcdhb11			AU020206			Pcdhb11			Pcdhb11			Pcdhb11			Pcdhb11
Unc93b1			Unc93b1			Unc93b1			Unc93b1			Unc93b1			Unc93b1			Unc93b1			Clec5a			Unc93b1			Unc93b1			Unc93b1			Unc93b1
Pld4			Pld4			Pld4			Pld4			Pld4			Pld4			Pld4			Pcdhb11			Pld4			Pld4			Pld4			Pld4
Ifit2			Ifit2			Ifit2			Ifit2			Ifit2			Ifit2			Ifit2			Unc93b1			Ifit2			Ifit2			Ifit2			Ifit2
Ramp3			Ramp3			Ramp3			Ramp3			Ramp3			Ramp3			Ramp3			Pld4			Ramp3			Ramp3			Ramp3			Ramp3
Ctsd			Ctsd			Ctsd			Ctsd			Ctsd			Ctsd			Ctsd			Ifit2			Ctsd			Ctsd			Ctsd			Ctsd
Cyth4			Cyth4			Cyth4			Cyth4			Cyth4			Cyth4			Cyth4			Ramp3			Cyth4			Cyth4			Cyth4			Cyth4
Ifi44			Ifi44			Ifi44			Ifi44			Ifi44			Ifi44			Ifi44			Ctsd			Ifi44			Ifi44			Ifi44			Ifi44
Mslnl			Mslnl			Mslnl			Mslnl			Mslnl			Mslnl			Mslnl			Cyth4			Mslnl			Mslnl			Mslnl			Mslnl
Gbp2			Gbp2			Gbp2			Gbp2			Gbp2			Gbp2			Gbp2			Ifi44			Gbp2			Gbp2			Gbp2			Gbp2
Cmtm7			Cmtm7			Cmtm7			Cmtm7			Cmtm7			Cmtm7			Cmtm7			Mslnl			Cmtm7			Cmtm7			Cmtm7			Cmtm7
Herc6			Herc6			Herc6			Herc6			Herc6			Herc6			Herc6			Gbp2			Herc6			Herc6			Herc6			Herc6
Fcgr3			Fcgr3			Fcgr3			Fcgr3			Fcgr3			Fcgr3			Fcgr3			Cmtm7			Fcgr3			Fcgr3			Fcgr3			Fcgr3
Aif1			Aif1			Aif1			Aif1			Aif1			Aif1			Aif1			Herc6			Aif1			Aif1			Aif1			Aif1
Oas2			Oas2			Oas2			Oas2			Oas2			Oas2			Oas2			Fcgr3			Oas2			Oas2			Oas2			Oas2
Pcdhga3			Pcdhga3			Pcdhga3			Pcdhga3			Pcdhga3			Pcdhga3			Pcdhga3			Aif1			Pcdhga3			Pcdhga3			Pcdhga3			Pcdhga3
Csf3r			Csf3r			Csf3r			Csf3r			Csf3r			Csf3r			Csf3r			Oas2			Csf3r			Csf3r			Csf3r			Csf3r
Cyba			Cyba			Cyba			Cyba			Cyba			Cyba			Cyba			Pcdhga3			Cyba			Cyba			Cyba			Cyba
Apobec1			Apobec1			Apobec1			Apobec1			Apobec1			Apobec1			Apobec1			Csf3r			Apobec1			Apobec1			Apobec1			Apobec1
Ccl3			Ccl3			Ccl3			Ccl3			Ccl3			Ccl3			Ccl3			Cyba			Ccl3			Ccl3			Ccl3			Ccl3
Cxcl16			Cxcl16			Cxcl16			Cxcl16			Cxcl16			Cxcl16			Cxcl16			Apobec1			Cxcl16			Cxcl16			Cxcl16			Cxcl16
Prokr2			Prokr2			Prokr2			Prokr2			Prokr2			Prokr2			Prokr2			Ccl3			Prokr2			Prokr2			Prokr2			Prokr2
Parp4			Parp4			Parp4			Parp4			Parp4			Parp4			Parp4			Cxcl16			Parp4			Parp4			Parp4			Parp4
Eva1c			Eva1c			Eva1c			Eva1c			Eva1c			Eva1c			Eva1c			Prokr2			Eva1c			Eva1c			Eva1c			Eva1c
Hpgds			Hpgds			Hpgds			Hpgds			Hpgds			Hpgds			Hpgds			Parp4			Hpgds			Hpgds			Hpgds			Hpgds
Ceacam5			Ceacam5			Ceacam5			Ceacam5			Ceacam5			Ceacam5			Ceacam5			Eva1c			Ceacam5			Ceacam5			Ceacam5			Ceacam5
Ly86			Ly86			Ly86			Ly86			Ly86			Ly86			Ly86			Hpgds			Ly86			Ly86			Ly86			Ly86
Gm5431			Gm5431			Gm5431			Gm5431			Gm5431			Gm5431			Gm5431			Ceacam5			Gm5431			Gm5431			Gm5431			Gm5431
Ifi209			Ifi209			Ifi209			Ifi209			Ifi209			Ifi209			Ifi209			Ly86			Ifi209			Ifi209			Ifi209			Ifi209
Mx1			Mx1			Mx1			Mx1			Mx1			Mx1			Mx1			Gm5431			Mx1			Mx1			Mx1			Mx1
Slamf9			Slamf9			Slamf9			Slamf9			Slamf9			Slamf9			Slamf9			Ifi209			Slamf9			Slamf9			Slamf9			Slamf9
Parp3			Parp3			Parp3			Parp3			Parp3			Parp3			Parp3			Mx1			Parp3			Parp3			Parp3			Parp3
Flnc			Flnc			Flnc			Flnc			Flnc			Flnc			Flnc			Slamf9			Flnc			Flnc			Flnc			Flnc
Cd33			Cd33			Cd33			Cd33			Cd33			Cd33			Cd33			Parp3			Cd33			Cd33			Cd33			Cd33
Parp12			Parp12			Parp12			Parp12			Parp12			Parp12			Parp12			Flnc			Parp12			Parp12			Parp12			Parp12
Ccl6			Ccl6			Ccl6			Ccl6			Ccl6			Ccl6			Ccl6			Cd33			Ccl6			Ccl6			Ccl6			Ccl6
Ets2			Ets2			Ets2			Ets2			Ets2			Ets2			Ets2			Parp12			Ets2			Ets2			Ets2			Ets2
Snca			Snca			Snca			Snca			Snca			Snca			Snca			Ccl6			Snca			Snca			Snca			Snca
Rsad2			Rsad2			Rsad2			Rsad2			Rsad2			Rsad2			Rsad2			Ets2			Rsad2			Rsad2			Rsad2			Rsad2
C3			C3			C3			C3			C3			C3			C3			Snca			C3			C3			C3			C3
Zbp1			Zbp1			Zbp1			Zbp1			Zbp1			Zbp1			Zbp1			Rsad2			Zbp1			Zbp1			Zbp1			Zbp1
Lsp1			Lsp1			Lsp1			Lsp1			Lsp1			Lsp1			Lsp1			C3			Lsp1			Lsp1			Lsp1			Lsp1
Ifi211			Ifi211			Ifi211			Ifi211			Ifi211			Ifi211			Ifi211			Zbp1			Ifi211			Ifi211			Ifi211			Ifi211
Slamf7			Slamf7			Slamf7			Slamf7			Slamf7			Slamf7			Slamf7			Lsp1			Slamf7			Slamf7			Slamf7			Slamf7
Gm43864			Gm43864			Gm43864			Gm43864			Gm43864			Gm43864			Gm43864			Ifi211			Gm43864			Gm43864			Gm43864			Gm43864
4930522L14Rik			4930522L14Rik			4930522L14Rik			4930522L14Rik			4930522L14Rik			4930522L14Rik			4930522L14Rik			Slamf7			4930522L14Rik			4930522L14Rik			4930522L14Rik			4930522L14Rik
Xaf1			Xaf1			Xaf1			Xaf1			Xaf1			Xaf1			Xaf1			Gm43864			Xaf1			Xaf1			Xaf1			Xaf1
Tnfrsf12a			Tnfrsf12a			Tnfrsf12a			Tnfrsf12a			Tnfrsf12a			Tnfrsf12a			Tnfrsf12a			4930522L14Rik			Tnfrsf12a			Tnfrsf12a			Tnfrsf12a			Tnfrsf12a
Ctsh			Ctsh			Ctsh			Ctsh			Ctsh			Ctsh			Ctsh			Xaf1			Ctsh			Ctsh			Ctsh			Ctsh
Gvin3			Gvin3			Gvin3			Gvin3			Gvin3			Gvin3			Gvin3			Tnfrsf12a			Gvin3			Gvin3			Gvin3			Gvin3
Ccdc82			Ccdc82			Ccdc82			Ccdc82			Ccdc82			Ccdc82			Ccdc82			Ctsh			Ccdc82			Ccdc82			Ccdc82			Ccdc82
Ube2l6			Ube2l6			Ube2l6			Ube2l6			Ube2l6			Ube2l6			Ube2l6			Gvin3			Ube2l6			Ube2l6			Ube2l6			Ube2l6
Cracdl			Cracdl			Cracdl			Cracdl			Cracdl			Cracdl			Cracdl			Ccdc82			Cracdl			Cracdl			Cracdl			Cracdl
Arhgap30			Arhgap30			Arhgap30			Arhgap30			Arhgap30			Arhgap30			Arhgap30			Ube2l6			Arhgap30			Arhgap30			Arhgap30			Arhgap30
Isg15			Isg15			Isg15			Isg15			Isg15			Isg15			Isg15			Cracdl			Isg15			Isg15			Isg15			Isg15
Ifi207			Ifi207			Ifi207			Ifi207			Ifi207			Ifi207			Ifi207			Arhgap30			Ifi207			Ifi207			Ifi207			Ifi207
Aox3			Aox3			Aox3			Aox3			Aox3			Aox3			Aox3			Isg15			Aox3			Aox3			Aox3			Aox3
Stat6			Stat6			Stat6			Stat6			Stat6			Stat6			Stat6			Ifi207			Stat6			Stat6			Stat6			Stat6
Cd53			Cd53			Cd53			Cd53			Cd53			Cd53			Cd53			Aox3			Cd53			Cd53			Cd53			Cd53
Nmi			Nmi			Nmi			Nmi			Nmi			Nmi			Nmi			Stat6			Nmi			Nmi			Nmi			Nmi
Treml2			Treml2			Treml2			Treml2			Treml2			Treml2			Treml2			Cd53			Treml2			Treml2			Treml2			Treml2
F830016B08Rik			F830016B08Rik			F830016B08Rik			F830016B08Rik			F830016B08Rik			F830016B08Rik			F830016B08Rik			Nmi			F830016B08Rik			F830016B08Rik			F830016B08Rik			F830016B08Rik
Tmc7			Tmc7			Tmc7			Tmc7			Tmc7			Tmc7			Tmc7			Treml2			Tmc7			Tmc7			Tmc7			Tmc7
Cd300c2			Cd300c2			Cd300c2			Cd300c2			Cd300c2			Cd300c2			Cd300c2			F830016B08Rik			Cd300c2			Cd300c2			Cd300c2			Cd300c2
Pcdha8			Pcdha8			Pcdha8			Pcdha8			Pcdha8			Pcdha8			Pcdha8			Tmc7			Pcdha8			Pcdha8			Pcdha8			Pcdha8
Blnk			Blnk			Blnk			Blnk			Blnk			Blnk			Blnk			Cd300c2			Blnk			Blnk			Blnk			Blnk
Ms4a6c			Ms4a6c			Ms4a6c			Ms4a6c			Ms4a6c			Ms4a6c			Ms4a6c			Pcdha8			Ms4a6c			Ms4a6c			Ms4a6c			Ms4a6c
Pcdha7			Pcdha7			Pcdha7			Pcdha7			Pcdha7			Pcdha7			Pcdha7			Blnk			Pcdha7			Pcdha7			Pcdha7			Pcdha7
Epsti1			Epsti1			Epsti1			Epsti1			Epsti1			Epsti1			Epsti1			Ms4a6c			Epsti1			Epsti1			Epsti1			Epsti1
Cda			Cda			Cda			Cda			Cda			Cda			Cda			Pcdha7			Cda			Cda			Cda			Cda
Ifi206			Ifi206			Ifi206			Ifi206			Ifi206			Ifi206			Ifi206			Epsti1			Ifi206			Ifi206			Ifi206			Ifi206
Fmo2			Fmo2			Fmo2			Fmo2			Fmo2			Fmo2			Fmo2			Cda			Fmo2			Fmo2			Fmo2			Fmo2
Tlr7			Tlr7			Tlr7			Tlr7			Tlr7			Tlr7			Tlr7			Ifi206			Tlr7			Tlr7			Tlr7			Tlr7
Ankdd1b			Ankdd1b			Ankdd1b			Ankdd1b			Ankdd1b			Ankdd1b			Ankdd1b			Fmo2			Ankdd1b			Ankdd1b			Ankdd1b			Ankdd1b
Ms4a6d			Ms4a6d			Ms4a6d			Ms4a6d			Ms4a6d			Ms4a6d			Ms4a6d			Tlr7			Ms4a6d			Ms4a6d			Ms4a6d			Ms4a6d
Hcls1			Hcls1			Hcls1			Hcls1			Hcls1			Hcls1			Hcls1			Ankdd1b			Hcls1			Hcls1			Hcls1			Hcls1
Ppp1r14c			Ppp1r14c			Ppp1r14c			Ppp1r14c			Ppp1r14c			Ppp1r14c			Ppp1r14c			Ms4a6d			Ppp1r14c			Ppp1r14c			Ppp1r14c			Ppp1r14c
AY036118			AY036118			AY036118			AY036118			AY036118			AY036118			AY036118			Hcls1			AY036118			AY036118			AY036118			AY036118
Tap1			Tap1			Tap1			Tap1			Tap1			Tap1			Tap1			Ppp1r14c			Tap1			Tap1			Tap1			Tap1
Phf11b			Phf11b			Phf11b			Phf11b			Phf11b			Phf11b			Phf11b			AY036118			Phf11b			Phf11b			Phf11b			Phf11b
Gm40466			Gm40466			Gm40466			Gm40466			Gm40466			Gm40466			Gm40466			Tap1			Gm40466			Gm40466			Gm40466			Gm40466
Chrnb2			Chrnb2			Chrnb2			Chrnb2			Chrnb2			Chrnb2			Chrnb2			Phf11b			Chrnb2			Chrnb2			Chrnb2			Chrnb2
Wdfy4			Wdfy4			Wdfy4			Wdfy4			Wdfy4			Wdfy4			Wdfy4			Gm40466			Wdfy4			Wdfy4			Wdfy4			Wdfy4
Tcap			Tcap			Tcap			Tcap			Tcap			Tcap			Tcap			Chrnb2			Tcap			Tcap			Tcap			Tcap
Ifi203			Ifi203			Ifi203			Ifi203			Ifi203			Ifi203			Ifi203			Wdfy4			Ifi203			Ifi203			Ifi203			Ifi203
H2-Q7			H2-Q7			H2-Q7			H2-Q7			H2-Q7			H2-Q7			H2-Q7			Tcap			H2-Q7			H2-Q7			H2-Q7			H2-Q7
Pik3cg			Pik3cg			Pik3cg			Pik3cg			Pik3cg			Pik3cg			Pik3cg			Ifi203			Pik3cg			Pik3cg			Pik3cg			Pik3cg
Plau			Plau			Plau			Plau			Plau			Plau			Plau			H2-Q7			Plau			Plau			Plau			Plau
Irgm2			Irgm2			Irgm2			Irgm2			Irgm2			Irgm2			Irgm2			Pik3cg			Irgm2			Irgm2			Irgm2			Irgm2
Ccdc3			Ccdc3			Ccdc3			Ccdc3			Ccdc3			Ccdc3			Ccdc3			Plau			Ccdc3			Ccdc3			Ccdc3			Ccdc3
Clec2l			Clec2l			Clec2l			Clec2l			Clec2l			Clec2l			Clec2l			Irgm2			Clec2l			Clec2l			Clec2l			Clec2l
Oas1g			Oas1g			Oas1g			Oas1g			Oas1g			Oas1g			Oas1g			Ccdc3			Oas1g			Oas1g			Oas1g			Oas1g
Apod			Apod			Apod			Apod			Apod			Apod			Apod			Clec2l			Apod			Apod			Apod			Apod
Met			Met			Met			Met			Met			Met			Met			Oas1g			Met			Met			Met			Met
Glipr1			Glipr1			Glipr1			Glipr1			Glipr1			Glipr1			Glipr1			Apod			Glipr1			Glipr1			Glipr1			Glipr1
A330023F24Rik			A330023F24Rik			A330023F24Rik			A330023F24Rik			A330023F24Rik			A330023F24Rik			A330023F24Rik			Met			A330023F24Rik			A330023F24Rik			A330023F24Rik			A330023F24Rik
Pcdhb2			Pcdhb2			Pcdhb2			Pcdhb2			Pcdhb2			Pcdhb2			Pcdhb2			Glipr1			Pcdhb2			Pcdhb2			Pcdhb2			Pcdhb2
H2-T22			H2-T22			H2-T22			H2-T22			H2-T22			H2-T22			H2-T22			A330023F24Rik			H2-T22			H2-T22			H2-T22			H2-T22
Pycard			Pycard			Pycard			Pycard			Pycard			Pycard			Pycard			Pcdhb2			Pycard			Pycard			Pycard			Pycard
Cldn11			Cldn11			Cldn11			Cldn11			Cldn11			Cldn11			Cldn11			H2-T22			Cldn11			Cldn11			Cldn11			Cldn11
Aspg			Aspg			Aspg			Aspg			Aspg			Aspg			Aspg			Pycard			Aspg			Aspg			Aspg			Aspg
Ccnd1			Ccnd1			Ccnd1			Ccnd1			Ccnd1			Ccnd1			Ccnd1			Cldn11			Ccnd1			Ccnd1			Ccnd1			Ccnd1
Slfn2			Slfn2			Slfn2			Slfn2			Slfn2			Slfn2			Slfn2			Aspg			Slfn2			Slfn2			Slfn2			Slfn2
Ranbp3l			Ranbp3l			Ranbp3l			Ranbp3l			Ranbp3l			Ranbp3l			Ranbp3l			Ccnd1			Ranbp3l			Ranbp3l			Ranbp3l			Ranbp3l
Gm45838			Gm45838			Gm45838			Gm45838			Gm45838			Gm45838			Gm45838			Slfn2			Gm45838			Gm45838			Gm45838			Gm45838
Naalad2			Naalad2			Naalad2			Naalad2			Naalad2			Naalad2			Naalad2			Ranbp3l			Naalad2			Naalad2			Naalad2			Naalad2
Tunar			Tunar			Tunar			Tunar			Tunar			Tunar			Tunar			Gm45838			Tunar			Tunar			Tunar			Tunar
Lcp2			Lcp2			Lcp2			Lcp2			Lcp2			Lcp2			Lcp2			Naalad2			Lcp2			Lcp2			Lcp2			Lcp2
9330154J02Rik			9330154J02Rik			9330154J02Rik			9330154J02Rik			9330154J02Rik			9330154J02Rik			9330154J02Rik			Tunar			9330154J02Rik			9330154J02Rik			9330154J02Rik			9330154J02Rik
Lair1			Lair1			Lair1			Lair1			Lair1			Lair1			Lair1			Lcp2			Lair1			Lair1			Lair1			Lair1
H2-M3			H2-M3			H2-M3			H2-M3			H2-M3			H2-M3			H2-M3			9330154J02Rik			H2-M3			H2-M3			H2-M3			H2-M3
Nab2			Nab2			Nab2			Nab2			Nab2			Nab2			Nab2			Lair1			Nab2			Nab2			Nab2			Nab2
Ptk2b			Ptk2b			Ptk2b			Ptk2b			Ptk2b			Ptk2b			Ptk2b			H2-M3			Ptk2b			Ptk2b			Ptk2b			Ptk2b
Hspa2			Hspa2			Hspa2			Hspa2			Hspa2			Hspa2			Hspa2			Nab2			Hspa2			Hspa2			Hspa2			Hspa2
Utrn			Utrn			Utrn			Utrn			Utrn			Utrn			Utrn			Ptk2b			Utrn			Utrn			Utrn			Utrn
Tapbp			Tapbp			Tapbp			Tapbp			Tapbp			Tapbp			Tapbp			Hspa2			Tapbp			Tapbp			Tapbp			Tapbp
Trim25			Trim25			Trim25			Trim25			Trim25			Trim25			Trim25			Utrn			Trim25			Trim25			Trim25			Trim25
Gm6548			Gm6548			Gm6548			Gm6548			Gm6548			Gm6548			Gm6548			Tapbp			Gm6548			Gm6548			Gm6548			Gm6548
Cd86			Cd86			Cd86			Cd86			Cd86			Cd86			Cd86			Trim25			Cd86			Cd86			Cd86			Cd86
Tirap			Tirap			Tirap			Tirap			Tirap			Tirap			Tirap			Gm6548			Tirap			Tirap			Tirap			Tirap
Plcg2			Plcg2			Plcg2			Plcg2			Plcg2			Plcg2			Plcg2			Cd86			Plcg2			Plcg2			Plcg2			Plcg2
Lilrb4b			Lilrb4b			Lilrb4b			Lilrb4b			Lilrb4b			Lilrb4b			Lilrb4b			Tirap			Lilrb4b			Lilrb4b			Lilrb4b			Lilrb4b
Txnip			Txnip			Txnip			Txnip			Txnip			Txnip			Txnip			Plcg2			Txnip			Txnip			Txnip			Txnip
Gm32618			Gm32618			Gm32618			Gm32618			Gm32618			Gm32618			Gm32618			Lilrb4b			Gm32618			Gm32618			Gm32618			Gm32618
H1f5			H1f5			H1f5			H1f5			H1f5			H1f5			H1f5			Txnip			H1f5			H1f5			H1f5			H1f5
Apoe			Apoe			Apoe			Apoe			Apoe			Apoe			Apoe			Gm32618			Apoe			Apoe			Apoe			Apoe
Gm20559			Gm20559			Gm20559			Gm20559			Gm20559			Gm20559			Gm20559			H1f5			Gm20559			Gm20559			Gm20559			Gm20559
Itsn2			Itsn2			Itsn2			Itsn2			Itsn2			Itsn2			Itsn2			Apoe			Itsn2			Itsn2			Itsn2			Itsn2
Platr25			Platr25			Platr25			Platr25			Platr25			Platr25			Platr25			Gm20559			Platr25			Platr25			Platr25			Platr25
Lcp1			Lcp1			Lcp1			Lcp1			Lcp1			Lcp1			Lcp1			Itsn2			Lcp1			Lcp1			Lcp1			Lcp1
Tex11			Tex11			Tex11			Tex11			Tex11			Tex11			Tex11			Platr25			Tex11			Tex11			Tex11			Tex11
Phf11d			Phf11d			Phf11d			Phf11d			Phf11d			Phf11d			Phf11d			Lcp1			Phf11d			Phf11d			Phf11d			Phf11d
Rin2			Rin2			Rin2			Rin2			Rin2			Rin2			Rin2			Tex11			Rin2			Rin2			Rin2			Rin2
Rn18s-rs5			Rn18s-rs5			Rn18s-rs5			Rn18s-rs5			Rn18s-rs5			Rn18s-rs5			Rn18s-rs5			Phf11d			Rn18s-rs5			Rn18s-rs5			Rn18s-rs5			Rn18s-rs5
Pik3ap1			Pik3ap1			Pik3ap1			Pik3ap1			Pik3ap1			Pik3ap1			Pik3ap1			Rin2			Pik3ap1			Pik3ap1			Pik3ap1			Pik3ap1
Adam19			Adam19			Adam19			Adam19			Adam19			Adam19			Adam19			Rn18s-rs5			Adam19			Adam19			Adam19			Adam19
Pcdha6			Pcdha6			Pcdha6			Pcdha6			Pcdha6			Pcdha6			Pcdha6			Pik3ap1			Pcdha6			Pcdha6			Pcdha6			Pcdha6
Kif16b			Kif16b			Kif16b			Kif16b			Kif16b			Kif16b			Kif16b			Adam19			Kif16b			Kif16b			Kif16b			Kif16b
Apol9a			Apol9a			Apol9a			Apol9a			Apol9a			Apol9a			Apol9a			Pcdha6			Apol9a			Apol9a			Apol9a			Apol9a
Gm16299			Gm16299			Gm16299			Gm16299			Gm16299			Gm16299			Gm16299			Kif16b			Gm16299			Gm16299			Gm16299			Gm16299
Pcdhgb1			Pcdhgb1			Pcdhgb1			Pcdhgb1			Pcdhgb1			Pcdhgb1			Pcdhgb1			Apol9a			Pcdhgb1			Pcdhgb1			Pcdhgb1			Pcdhgb1
Lgals1			Lgals1			Lgals1			Lgals1			Lgals1			Lgals1			Lgals1			Gm16299			Lgals1			Lgals1			Lgals1			Lgals1
Gm3912			Gm3912			Gm3912			Gm3912			Gm3912			Gm3912			Gm3912			Pcdhgb1			Gm3912			Gm3912			Gm3912			Gm3912
Cd72			Cd72			Cd72			Cd72			Cd72			Cd72			Cd72			Lgals1			Cd72			Cd72			Cd72			Cd72
Arhgap25			Arhgap25			Arhgap25			Arhgap25			Arhgap25			Arhgap25			Arhgap25			Gm3912			Arhgap25			Arhgap25			Arhgap25			Arhgap25
Ezr			Ezr			Ezr			Ezr			Ezr			Ezr			Ezr			Cd72			Ezr			Ezr			Ezr			Ezr
Gm6277			Gm6277			Gm6277			Gm6277			Gm6277			Gm6277			Gm6277			Arhgap25			Gm6277			Gm6277			Gm6277			Gm6277
Samsn1			Samsn1			Samsn1			Samsn1			Samsn1			Samsn1			Samsn1			Ezr			Samsn1			Samsn1			Samsn1			Samsn1
Sp100			Sp100			Sp100			Sp100			Sp100			Sp100			Sp100			Gm6277			Sp100			Sp100			Sp100			Sp100
Vav1			Vav1			Vav1			Vav1			Vav1			Vav1			Vav1			Samsn1			Vav1			Vav1			Vav1			Vav1
Iigp1			Iigp1			Iigp1			Iigp1			Iigp1			Iigp1			Iigp1			Sp100			Iigp1			Iigp1			Iigp1			Iigp1
4932438H23Rik			4932438H23Rik			4932438H23Rik			4932438H23Rik			4932438H23Rik			4932438H23Rik			4932438H23Rik			Vav1			4932438H23Rik			4932438H23Rik			4932438H23Rik			4932438H23Rik
Abca1			Abca1			Abca1			Abca1			Abca1			Abca1			Abca1			Iigp1			Abca1			Abca1			Abca1			Abca1
Asl			Asl			Asl			Asl			Asl			Asl			Asl			4932438H23Rik			Asl			Asl			Asl			Asl
Ddr2			Ddr2			Ddr2			Ddr2			Ddr2			Ddr2			Ddr2			Abca1			Ddr2			Ddr2			Ddr2			Ddr2
Gpr17			Gpr17			Gpr17			Gpr17			Gpr17			Gpr17			Gpr17			Asl			Gpr17			Gpr17			Gpr17			Gpr17
Gm16701			Gm16701			Gm16701			Gm16701			Gm16701			Gm16701			Gm16701			Ddr2			Gm16701			Gm16701			Gm16701			Gm16701
Cd37			Cd37			Cd37			Cd37			Cd37			Cd37			Cd37			Gpr17			Cd37			Cd37			Cd37			Cd37
Ncf1			Ncf1			Ncf1			Ncf1			Ncf1			Ncf1			Ncf1			Gm16701			Ncf1			Ncf1			Ncf1			Ncf1
Siglec1			Siglec1			Siglec1			Siglec1			Siglec1			Siglec1			Siglec1			Cd37			Siglec1			Siglec1			Siglec1			Siglec1
Six4			Six4			Six4			Six4			Six4			Six4			Six4			Ncf1			Six4			Six4			Six4			Six4
Ifi208			Ifi208			Ifi208			Ifi208			Ifi208			Ifi208			Ifi208			Siglec1			Ifi208			Ifi208			Ifi208			Ifi208
Zfp97			Zfp97			Zfp97			Zfp97			Zfp97			Zfp97			Zfp97			Six4			Zfp97			Zfp97			Zfp97			Zfp97
Rprml			Rprml			Rprml			Rprml			Rprml			Rprml			Rprml			Ifi208			Rprml			Rprml			Rprml			Rprml
Cbx8			Cbx8			Cbx8			Cbx8			Cbx8			Cbx8			Cbx8			Zfp97			Cbx8			Cbx8			Cbx8			Cbx8
Rorc			Rorc			Rorc			Rorc			Rorc			Rorc			Rorc			Rprml			Rorc			Rorc			Rorc			Rorc
Psmb9			Psmb9			Psmb9			Psmb9			Psmb9			Psmb9			Psmb9			Cbx8			Psmb9			Psmb9			Psmb9			Psmb9
Kcnb2			Kcnb2			Kcnb2			Kcnb2			Kcnb2			Kcnb2			Kcnb2			Rorc			Kcnb2			Kcnb2			Kcnb2			Kcnb2
Trank1			Trank1			Trank1			Trank1			Trank1			Trank1			Trank1			Psmb9			Trank1			Trank1			Trank1			Trank1
Tgfbr1			Tgfbr1			Tgfbr1			Tgfbr1			Tgfbr1			Tgfbr1			Tgfbr1			Kcnb2			Tgfbr1			Tgfbr1			Tgfbr1			Tgfbr1
Rnase4			Rnase4			Rnase4			Rnase4			Rnase4			Rnase4			Rnase4			Trank1			Rnase4			Rnase4			Rnase4			Rnase4
Pcdhga4			Pcdhga4			Pcdhga4			Pcdhga4			Pcdhga4			Pcdhga4			Pcdhga4			Tgfbr1			Pcdhga4			Pcdhga4			Pcdhga4			Pcdhga4
Pros1			Pros1			Pros1			Pros1			Pros1			Pros1			Pros1			Rnase4			Pros1			Pros1			Pros1			Pros1
Pcdha9			Pcdha9			Pcdha9			Pcdha9			Pcdha9			Pcdha9			Pcdha9			Pcdhga4			Pcdha9			Pcdha9			Pcdha9			Pcdha9
Itpr3			Itpr3			Itpr3			Itpr3			Itpr3			Itpr3			Itpr3			Pros1			Itpr3			Itpr3			Itpr3			Itpr3
Rassf9			Rassf9			Rassf9			Rassf9			Rassf9			Rassf9			Rassf9			Pcdha9			Rassf9			Rassf9			Rassf9			Rassf9
Qprt			Qprt			Qprt			Qprt			Qprt			Qprt			Qprt			Itpr3			Qprt			Qprt			Qprt			Qprt
Cbx4			Cbx4			Cbx4			Cbx4			Cbx4			Cbx4			Cbx4			Rassf9			Cbx4			Cbx4			Cbx4			Cbx4
Nr1h3			Nr1h3			Nr1h3			Nr1h3			Nr1h3			Nr1h3			Nr1h3			Qprt			Nr1h3			Nr1h3			Nr1h3			Nr1h3
Sema5a			Sema5a			Sema5a			Sema5a			Sema5a			Sema5a			Sema5a			Cbx4			Sema5a			Sema5a			Sema5a			Sema5a
Fmn1			Fmn1			Fmn1			Fmn1			Fmn1			Fmn1			Fmn1			Nr1h3			Fmn1			Fmn1			Fmn1			Fmn1
Cd74			Cd74			Cd74			Cd74			Cd74			Cd74			Cd74			Sema5a			Cd74			Cd74			Cd74			Cd74
Fam169a			Fam169a			Fam169a			Fam169a			Fam169a			Fam169a			Fam169a			Fmn1			Fam169a			Fam169a			Fam169a			Fam169a
Adgrb2			Adgrb2			Adgrb2			Adgrb2			Adgrb2			Adgrb2			Adgrb2			Cd74			Adgrb2			Adgrb2			Adgrb2			Adgrb2
Dsc2			Dsc2			Dsc2			Dsc2			Dsc2			Dsc2			Dsc2			Fam169a			Dsc2			Dsc2			Dsc2			Dsc2
Dhx58			Dhx58			Dhx58			Dhx58			Dhx58			Dhx58			Dhx58			Adgrb2			Dhx58			Dhx58			Dhx58			Dhx58
Hck			Hck			Hck			Hck			Hck			Hck			Hck			Dsc2			Hck			Hck			Hck			Hck
Ifitm3			Ifitm3			Ifitm3			Ifitm3			Ifitm3			Ifitm3			Ifitm3			Dhx58			Ifitm3			Ifitm3			Ifitm3			Ifitm3
Pcdha10			Pcdha10			Pcdha10			Pcdha10			Pcdha10			Pcdha10			Pcdha10			Hck			Pcdha10			Pcdha10			Pcdha10			Pcdha10
Slc15a3			Slc15a3			Slc15a3			Slc15a3			Slc15a3			Slc15a3			Slc15a3			Ifitm3			Slc15a3			Slc15a3			Slc15a3			Slc15a3
Chst3			Chst3			Chst3			Chst3			Chst3			Chst3			Chst3			Pcdha10			Chst3			Chst3			Chst3			Chst3
Plppr4			Plppr4			Plppr4			Plppr4			Plppr4			Plppr4			Plppr4			Slc15a3			Plppr4			Plppr4			Plppr4			Plppr4
Nrep			Nrep			Nrep			Nrep			Nrep			Nrep			Nrep			Chst3			Nrep			Nrep			Nrep			Nrep
Tmem119			Tmem119			Tmem119			Tmem119			Tmem119			Tmem119			Tmem119			Plppr4			Tmem119			Tmem119			Tmem119			Tmem119
9930111J21Rik1			9930111J21Rik1			9930111J21Rik1			9930111J21Rik1			9930111J21Rik1			9930111J21Rik1			9930111J21Rik1			Nrep			9930111J21Rik1			9930111J21Rik1			9930111J21Rik1			9930111J21Rik1
Rad51ap2			Rad51ap2			Rad51ap2			Rad51ap2			Rad51ap2			Rad51ap2			Rad51ap2			Tmem119			Rad51ap2			Rad51ap2			Rad51ap2			Rad51ap2
Wfdc17			Wfdc17			Wfdc17			Wfdc17			Wfdc17			Wfdc17			Wfdc17			9930111J21Rik1			Wfdc17			Wfdc17			Wfdc17			Wfdc17
Lgals9			Lgals9			Lgals9			Lgals9			Lgals9			Lgals9			Lgals9			Rad51ap2			Lgals9			Lgals9			Lgals9			Lgals9
E230025N22Rik			E230025N22Rik			E230025N22Rik			E230025N22Rik			E230025N22Rik			E230025N22Rik			E230025N22Rik			Wfdc17			E230025N22Rik			E230025N22Rik			E230025N22Rik			E230025N22Rik
Inpp5d			Inpp5d			Inpp5d			Inpp5d			Inpp5d			Inpp5d			Inpp5d			Lgals9			Inpp5d			Inpp5d			Inpp5d			Inpp5d
Pcdha11			Pcdha11			Pcdha11			Pcdha11			Pcdha11			Pcdha11			Pcdha11			E230025N22Rik			Pcdha11			Pcdha11			Pcdha11			Pcdha11
Pcdhga8			Pcdhga8			Pcdhga8			Pcdhga8			Pcdhga8			Pcdhga8			Pcdhga8			Inpp5d			Pcdhga8			Pcdhga8			Pcdhga8			Pcdhga8
Pdlim3			Pdlim3			Pdlim3			Pdlim3			Pdlim3			Pdlim3			Pdlim3			Pcdha11			Pdlim3			Pdlim3			Pdlim3			Pdlim3
Akr1b8			Akr1b8			Akr1b8			Akr1b8			Akr1b8			Akr1b8			Akr1b8			Pcdhga8			Akr1b8			Akr1b8			Akr1b8			Akr1b8
Milr1			Milr1			Milr1			Milr1			Milr1			Milr1			Milr1			Pdlim3			Milr1			Milr1			Milr1			Milr1
Oasl1			Oasl1			Oasl1			Oasl1			Oasl1			Oasl1			Oasl1			Akr1b8			Oasl1			Oasl1			Oasl1			Oasl1
Chst15			Chst15			Chst15			Chst15			Chst15			Chst15			Chst15			Milr1			Chst15			Chst15			Chst15			Chst15
Hsd17b11			Hsd17b11			Hsd17b11			Hsd17b11			Hsd17b11			Hsd17b11			Hsd17b11			Oasl1			Hsd17b11			Hsd17b11			Hsd17b11			Hsd17b11
Rims3			Rims3			Rims3			Rims3			Rims3			Rims3			Rims3			Chst15			Rims3			Rims3			Rims3			Rims3
Ankef1			Ankef1			Ankef1			Ankef1			Ankef1			Ankef1			Ankef1			Hsd17b11			Ankef1			Ankef1			Ankef1			Ankef1
Gpr34			Gpr34			Gpr34			Gpr34			Gpr34			Gpr34			Gpr34			Rims3			Gpr34			Gpr34			Gpr34			Gpr34
5430421F17Rik			5430421F17Rik			5430421F17Rik			5430421F17Rik			5430421F17Rik			5430421F17Rik			5430421F17Rik			Ankef1			5430421F17Rik			5430421F17Rik			5430421F17Rik			5430421F17Rik
Gm26797			Gm26797			Gm26797			Gm26797			Gm26797			Gm26797			Gm26797			Gpr34			Gm26797			Gm26797			Gm26797			Gm26797
Arl4c			Arl4c			Arl4c			Arl4c			Arl4c			Arl4c			Arl4c			5430421F17Rik			Arl4c			Arl4c			Arl4c			Arl4c
H2-Q6			H2-Q6			H2-Q6			H2-Q6			H2-Q6			H2-Q6			H2-Q6			Gm26797			H2-Q6			H2-Q6			H2-Q6			H2-Q6
Ikzf1			Ikzf1			Ikzf1			Ikzf1			Ikzf1			Ikzf1			Ikzf1			Arl4c			Ikzf1			Ikzf1			Ikzf1			Ikzf1
Lars2			Lars2			Lars2			Lars2			Lars2			Lars2			Lars2			H2-Q6			Lars2			Lars2			Lars2			Lars2
Gsdmd			Gsdmd			Gsdmd			Gsdmd			Gsdmd			Gsdmd			Gsdmd			Ikzf1			Gsdmd			Gsdmd			Gsdmd			Gsdmd
Asxl3			Asxl3			Asxl3			Asxl3			Asxl3			Asxl3			Asxl3			Lars2			Asxl3			Asxl3			Asxl3			Asxl3
Cd180			Cd180			Cd180			Cd180			Cd180			Cd180			Cd180			Gsdmd			Cd180			Cd180			Cd180			Cd180
Dcbld1			Dcbld1			Dcbld1			Dcbld1			Dcbld1			Dcbld1			Dcbld1			Asxl3			Dcbld1			Dcbld1			Dcbld1			Dcbld1
Ifi35			Ifi35			Ifi35			Ifi35			Ifi35			Ifi35			Ifi35			Cd180			Ifi35			Ifi35			Ifi35			Ifi35
Anxa3			Anxa3			Anxa3			Anxa3			Anxa3			Anxa3			Anxa3			Dcbld1			Anxa3			Anxa3			Anxa3			Anxa3
Gdf11			Gdf11			Gdf11			Gdf11			Gdf11			Gdf11			Gdf11			Ifi35			Gdf11			Gdf11			Gdf11			Gdf11
Dock8			Dock8			Dock8			Dock8			Dock8			Dock8			Dock8			Anxa3			Dock8			Dock8			Dock8			Dock8
Havcr2			Havcr2			Havcr2			Havcr2			Havcr2			Havcr2			Havcr2			Gdf11			Havcr2			Havcr2			Havcr2			Havcr2
Irf1			Irf1			Irf1			Irf1			Irf1			Irf1			Irf1			Dock8			Irf1			Irf1			Irf1			Irf1
Gabbr1			Gabbr1			Gabbr1			Gabbr1			Gabbr1			Gabbr1			Gabbr1			Havcr2			Gabbr1			Gabbr1			Gabbr1			Gabbr1
Csf1r			Csf1r			Csf1r			Csf1r			Csf1r			Csf1r			Csf1r			Irf1			Csf1r			Csf1r			Csf1r			Csf1r
Adamtsl3			Adamtsl3			Adamtsl3			Adamtsl3			Adamtsl3			Adamtsl3			Adamtsl3			Gabbr1			Adamtsl3			Adamtsl3			Adamtsl3			Adamtsl3
Synpr			Synpr			Synpr			Synpr			Synpr			Synpr			Synpr			Csf1r			Synpr			Synpr			Synpr			Synpr
Pcdha5			Pcdha5			Pcdha5			Pcdha5			Pcdha5			Pcdha5			Pcdha5			Adamtsl3			Pcdha5			Pcdha5			Pcdha5			Pcdha5
Parvg			Parvg			Parvg			Parvg			Parvg			Parvg			Parvg			Synpr			Parvg			Parvg			Parvg			Parvg
Pcdhb12			Pcdhb12			Pcdhb12			Pcdhb12			Pcdhb12			Pcdhb12			Pcdhb12			Pcdha5			Pcdhb12			Pcdhb12			Pcdhb12			Pcdhb12
Klf6			Klf6			Klf6			Klf6			Klf6			Klf6			Klf6			Parvg			Klf6			Klf6			Klf6			Klf6
0610043K17Rik			0610043K17Rik			0610043K17Rik			0610043K17Rik			0610043K17Rik			0610043K17Rik			0610043K17Rik			Pcdhb12			0610043K17Rik			0610043K17Rik			0610043K17Rik			0610043K17Rik
Ftl1			Ftl1			Ftl1			Ftl1			Ftl1			Ftl1			Ftl1			Klf6			Ftl1			Ftl1			Ftl1			Ftl1
Arhgap45			Arhgap45			Arhgap45			Arhgap45			Arhgap45			Arhgap45			Arhgap45			0610043K17Rik			Arhgap45			Arhgap45			Arhgap45			Arhgap45
Klf13			Klf13			Klf13			Klf13			Klf13			Klf13			Klf13			Ftl1			Klf13			Klf13			Klf13			Klf13
1810010H24Rik			1810010H24Rik			1810010H24Rik			1810010H24Rik			1810010H24Rik			1810010H24Rik			1810010H24Rik			Arhgap45			1810010H24Rik			1810010H24Rik			1810010H24Rik			1810010H24Rik
Itih3			Itih3			Itih3			Itih3			Itih3			Itih3			Itih3			Klf13			Itih3			Itih3			Itih3			Itih3
Itgav			Itgav			Itgav			Itgav			Itgav			Itgav			Itgav			1810010H24Rik			Itgav			Itgav			Itgav			Itgav
Tlr4			Tlr4			Tlr4			Tlr4			Tlr4			Tlr4			Tlr4			Itih3			Tlr4			Tlr4			Tlr4			Tlr4
Irf5			Irf5			Irf5			Irf5			Irf5			Irf5			Irf5			Itgav			Irf5			Irf5			Irf5			Irf5
Vil1			Vil1			Vil1			Vil1			Vil1			Vil1			Vil1			Tlr4			Vil1			Vil1			Vil1			Vil1
Cyp2f2			Cyp2f2			Cyp2f2			Cyp2f2			Cyp2f2			Cyp2f2			Cyp2f2			Irf5			Cyp2f2			Cyp2f2			Cyp2f2			Cyp2f2
Plp1			Plp1			Plp1			Plp1			Plp1			Plp1			Plp1			Vil1			Plp1			Plp1			Plp1			Plp1
Anxa4			Anxa4			Anxa4			Anxa4			Anxa4			Anxa4			Anxa4			Cyp2f2			Anxa4			Anxa4			Anxa4			Anxa4
Tgtp1			Tgtp1			Tgtp1			Tgtp1			Tgtp1			Tgtp1			Tgtp1			Plp1			Tgtp1			Tgtp1			Tgtp1			Tgtp1
Aff2			Aff2			Aff2			Aff2			Aff2			Aff2			Aff2			Anxa4			Aff2			Aff2			Aff2			Aff2
Sp140			Sp140			Sp140			Sp140			Sp140			Sp140			Sp140			Tgtp1			Sp140			Sp140			Sp140			Sp140
P2ry13			P2ry13			P2ry13			P2ry13			P2ry13			P2ry13			P2ry13			Aff2			P2ry13			P2ry13			P2ry13			P2ry13
Inka2			Inka2			Inka2			Inka2			Inka2			Inka2			Inka2			Sp140			Inka2			Inka2			Inka2			Inka2
Myof			Myof			Myof			Myof			Myof			Myof			Myof			P2ry13			Myof			Myof			Myof			Myof
Arl11			Arl11			Arl11			Arl11			Arl11			Arl11			Arl11			Inka2			Arl11			Arl11			Arl11			Arl11
Cdr1os			Cdr1os			Cdr1os			Cdr1os			Cdr1os			Cdr1os			Cdr1os			Myof			Cdr1os			Cdr1os			Cdr1os			Cdr1os
Tnr			Tnr			Tnr			Tnr			Tnr			Tnr			Tnr			Arl11			Tnr			Tnr			Tnr			Tnr
Gm37753			Gm37753			Gm37753			Gm37753			Gm37753			Gm37753			Gm37753			Cdr1os			Gm37753			Gm37753			Gm37753			Gm37753
Txlnb			Txlnb			Txlnb			Txlnb			Txlnb			Txlnb			Txlnb			Tnr			Txlnb			Txlnb			Txlnb			Txlnb
D430041D05Rik			D430041D05Rik			D430041D05Rik			D430041D05Rik			D430041D05Rik			D430041D05Rik			D430041D05Rik			Gm37753			D430041D05Rik			D430041D05Rik			D430041D05Rik			D430041D05Rik
Rasal3			Rasal3			Rasal3			Rasal3			Rasal3			Rasal3			Rasal3			Txlnb			Rasal3			Rasal3			Rasal3			Rasal3
Bdkrb2			Bdkrb2			Bdkrb2			Bdkrb2			Bdkrb2			Bdkrb2			Bdkrb2			D430041D05Rik			Bdkrb2			Bdkrb2			Bdkrb2			Bdkrb2
Etnppl			Etnppl			Etnppl			Etnppl			Etnppl			Etnppl			Etnppl			Rasal3			Etnppl			Etnppl			Etnppl			Etnppl
Fgf2			Fgf2			Fgf2			Fgf2			Fgf2			Fgf2			Fgf2			Bdkrb2			Fgf2			Fgf2			Fgf2			Fgf2
Mpzl2			Mpzl2			Mpzl2			Mpzl2			Mpzl2			Mpzl2			Mpzl2			Etnppl			Mpzl2			Mpzl2			Mpzl2			Mpzl2
Tlr1			Tlr1			Tlr1			Tlr1			Tlr1			Tlr1			Tlr1			Fgf2			Tlr1			Tlr1			Tlr1			Tlr1
Slc44a5			Slc44a5			Slc44a5			Slc44a5			Slc44a5			Slc44a5			Slc44a5			Mpzl2			Slc44a5			Slc44a5			Slc44a5			Slc44a5
Gask1b			Gask1b			Gask1b			Gask1b			Gask1b			Gask1b			Gask1b			Tlr1			Gask1b			Gask1b			Gask1b			Gask1b
Grm4			Grm4			Grm4			Grm4			Grm4			Grm4			Grm4			Slc44a5			Grm4			Grm4			Grm4			Grm4
Pcdhb13			Pcdhb13			Pcdhb13			Pcdhb13			Pcdhb13			Pcdhb13			Pcdhb13			Gask1b			Pcdhb13			Pcdhb13			Pcdhb13			Pcdhb13
Pcdhb6			Pcdhb6			Pcdhb6			Pcdhb6			Pcdhb6			Pcdhb6			Pcdhb6			Grm4			Pcdhb6			Pcdhb6			Pcdhb6			Pcdhb6
Plxnc1			Plxnc1			Plxnc1			Plxnc1			Plxnc1			Plxnc1			Plxnc1			Pcdhb13			Plxnc1			Plxnc1			Plxnc1			Plxnc1
Fes			Fes			Fes			Fes			Fes			Fes			Fes			Pcdhb6			Fes			Fes			Fes			Fes
Jade1			Jade1			Jade1			Jade1			Jade1			Jade1			Jade1			Plxnc1			Jade1			Jade1			Jade1			Jade1
Gm46404			Gm46404			Gm46404			Gm46404			Gm46404			Gm46404			Gm46404			Fes			Gm46404			Gm46404			Gm46404			Gm46404
Reep2			Reep2			Reep2			Reep2			Reep2			Reep2			Reep2			Jade1			Reep2			Reep2			Reep2			Reep2
Maml3			Maml3			Maml3			Maml3			Maml3			Maml3			Maml3			Gm46404			Maml3			Maml3			Maml3			Maml3
Zfp951			Zfp951			Zfp951			Zfp951			Zfp951			Zfp951			Zfp951			Reep2			Zfp951			Zfp951			Zfp951			Zfp951
Zfp827			Zfp827			Zfp827			Zfp827			Zfp827			Zfp827			Zfp827			Maml3			Zfp827			Zfp827			Zfp827			Zfp827
Hs3st5			Hs3st5			Hs3st5			Hs3st5			Hs3st5			Hs3st5			Hs3st5			Zfp951			Hs3st5			Hs3st5			Hs3st5			Hs3st5
Tspan2			Tspan2			Tspan2			Tspan2			Tspan2			Tspan2			Tspan2			Zfp827			Tspan2			Tspan2			Tspan2			Tspan2
Man2b1			Man2b1			Man2b1			Man2b1			Man2b1			Man2b1			Man2b1			Hs3st5			Man2b1			Man2b1			Man2b1			Man2b1
Mmp19			Mmp19			Mmp19			Mmp19			Mmp19			Mmp19			Mmp19			Tspan2			Mmp19			Mmp19			Mmp19			Mmp19
Slc8a2			Slc8a2			Slc8a2			Slc8a2			Slc8a2			Slc8a2			Slc8a2			Man2b1			Slc8a2			Slc8a2			Slc8a2			Slc8a2
Comp			Comp			Comp			Comp			Comp			Comp			Comp			Mmp19			Comp			Comp			Comp			Comp
Helb			Helb			Helb			Helb			Helb			Helb			Helb			Slc8a2			Helb			Helb			Helb			Helb
Abcc12			Abcc12			Abcc12			Abcc12			Abcc12			Abcc12			Abcc12			Comp			Abcc12			Abcc12			Abcc12			Abcc12
H2-T24			H2-T24			H2-T24			H2-T24			H2-T24			H2-T24			H2-T24			Helb			H2-T24			H2-T24			H2-T24			H2-T24
1700028P14Rik			1700028P14Rik			1700028P14Rik			1700028P14Rik			1700028P14Rik			1700028P14Rik			1700028P14Rik			Abcc12			1700028P14Rik			1700028P14Rik			1700028P14Rik			1700028P14Rik
Gm7240			Gm7240			Gm7240			Gm7240			Gm7240			Gm7240			Gm7240			H2-T24			Gm7240			Gm7240			Gm7240			Gm7240
Fyb			Fyb			Fyb			Fyb			Fyb			Fyb			Fyb			1700028P14Rik			Fyb			Fyb			Fyb			Fyb
Tnfrsf1b			Tnfrsf1b			Tnfrsf1b			Tnfrsf1b			Tnfrsf1b			Tnfrsf1b			Tnfrsf1b			Gm7240			Tnfrsf1b			Tnfrsf1b			Tnfrsf1b			Tnfrsf1b
Axl			Axl			Axl			Axl			Axl			Axl			Axl			Fyb			Axl			Axl			Axl			Axl
Papss2			Papss2			Papss2			Papss2			Papss2			Papss2			Papss2			Tnfrsf1b			Papss2			Papss2			Papss2			Papss2
Uap1l1			Uap1l1			Uap1l1			Uap1l1			Uap1l1			Uap1l1			Uap1l1			Axl			Uap1l1			Uap1l1			Uap1l1			Uap1l1
Syde1			Syde1			Syde1			Syde1			Syde1			Syde1			Syde1			Papss2			Syde1			Syde1			Syde1			Syde1
Ncf2			Ncf2			Ncf2			Ncf2			Ncf2			Ncf2			Ncf2			Uap1l1			Ncf2			Ncf2			Ncf2			Ncf2
Pirb			Pirb			Pirb			Pirb			Pirb			Pirb			Pirb			Syde1			Pirb			Pirb			Pirb			Pirb
Plcb2			Plcb2			Plcb2			Plcb2			Plcb2			Plcb2			Plcb2			Ncf2			Plcb2			Plcb2			Plcb2			Plcb2
Gm37769			Gm37769			Gm37769			Gm37769			Gm37769			Gm37769			Gm37769			Pirb			Gm37769			Gm37769			Gm37769			Gm37769
Pcdh12			Pcdh12			Pcdh12			Pcdh12			Pcdh12			Pcdh12			Pcdh12			Plcb2			Pcdh12			Pcdh12			Pcdh12			Pcdh12
Mdga1			Mdga1			Mdga1			Mdga1			Mdga1			Mdga1			Mdga1			Gm37769			Mdga1			Mdga1			Mdga1			Mdga1
C1ra			C1ra			C1ra			C1ra			C1ra			C1ra			C1ra			Pcdh12			C1ra			C1ra			C1ra			C1ra
Trim21			Trim21			Trim21			Trim21			Trim21			Trim21			Trim21			Mdga1			Trim21			Trim21			Trim21			Trim21
Rspo3			Rspo3			Rspo3			Rspo3			Rspo3			Rspo3			Rspo3			C1ra			Rspo3			Rspo3			Rspo3			Rspo3
Sp110			Sp110			Sp110			Sp110			Sp110			Sp110			Sp110			Trim21			Sp110			Sp110			Sp110			Sp110
Mfsd4a			Mfsd4a			Mfsd4a			Mfsd4a			Mfsd4a			Mfsd4a			Mfsd4a			Rspo3			Mfsd4a			Mfsd4a			Mfsd4a			Mfsd4a
Kctd8			Kctd8			Kctd8			Kctd8			Kctd8			Kctd8			Kctd8			Sp110			Kctd8			Kctd8			Kctd8			Kctd8
Slc16a14			Slc16a14			Slc16a14			Slc16a14			Slc16a14			Slc16a14			Slc16a14			Mfsd4a			Slc16a14			Slc16a14			Slc16a14			Slc16a14
St8sia6			St8sia6			St8sia6			St8sia6			St8sia6			St8sia6			St8sia6			Kctd8			St8sia6			St8sia6			St8sia6			St8sia6
C230086J09Rik			C230086J09Rik			C230086J09Rik			C230086J09Rik			C230086J09Rik			C230086J09Rik			C230086J09Rik			Slc16a14			C230086J09Rik			C230086J09Rik			C230086J09Rik			C230086J09Rik
Layn			Layn			Layn			Layn			Layn			Layn			Layn			St8sia6			Layn			Layn			Layn			Layn
Gm20276			Gm20276			Gm20276			Gm20276			Gm20276			Gm20276			Gm20276			C230086J09Rik			Gm20276			Gm20276			Gm20276			Gm20276
Mybl1			Mybl1			Mybl1			Mybl1			Mybl1			Mybl1			Mybl1			Layn			Mybl1			Mybl1			Mybl1			Mybl1
Gusb			Gusb			Gusb			Gusb			Gusb			Gusb			Gusb			Gm20276			Gusb			Gusb			Gusb			Gusb
E2f3			E2f3			E2f3			E2f3			E2f3			E2f3			E2f3			Mybl1			E2f3			E2f3			E2f3			E2f3
Adamts18			Adamts18			Adamts18			Adamts18			Adamts18			Adamts18			Adamts18			Gusb			Adamts18			Adamts18			Adamts18			Adamts18
4732463B04Rik			4732463B04Rik			4732463B04Rik			4732463B04Rik			4732463B04Rik			4732463B04Rik			4732463B04Rik			E2f3			4732463B04Rik			4732463B04Rik			4732463B04Rik			4732463B04Rik
Fermt3			Fermt3			Fermt3			Fermt3			Fermt3			Fermt3			Fermt3			Adamts18			Fermt3			Fermt3			Fermt3			Fermt3
Etv4			Etv4			Etv4			Etv4			Etv4			Etv4			Etv4			4732463B04Rik			Etv4			Etv4			Etv4			Etv4
Nfe2l2			Nfe2l2			Nfe2l2			Nfe2l2			Nfe2l2			Nfe2l2			Nfe2l2			Fermt3			Nfe2l2			Nfe2l2			Nfe2l2			Nfe2l2
Tagap			Tagap			Tagap			Tagap			Tagap			Tagap			Tagap			Etv4			Tagap			Tagap			Tagap			Tagap
Cst6			Cst6			Cst6			Cst6			Cst6			Cst6			Cst6			Nfe2l2			Cst6			Cst6			Cst6			Cst6
Igsf10			Igsf10			Igsf10			Igsf10			Igsf10			Igsf10			Igsf10			Tagap			Igsf10			Igsf10			Igsf10			Igsf10
H2-DMb1			H2-DMb1			H2-DMb1			H2-DMb1			H2-DMb1			H2-DMb1			H2-DMb1			Cst6			H2-DMb1			H2-DMb1			H2-DMb1			H2-DMb1
Lag3			Lag3			Lag3			Lag3			Lag3			Lag3			Lag3			Igsf10			Lag3			Lag3			Lag3			Lag3
Id2			Id2			Id2			Id2			Id2			Id2			Id2			H2-DMb1			Id2			Id2			Id2			Id2
Zfp808			Zfp808			Zfp808			Zfp808			Zfp808			Zfp808			Zfp808			Lag3			Zfp808			Zfp808			Zfp808			Zfp808
Slc8a1			Slc8a1			Slc8a1			Slc8a1			Slc8a1			Slc8a1			Slc8a1			Id2			Slc8a1			Slc8a1			Slc8a1			Slc8a1
Itgam			Itgam			Itgam			Itgam			Itgam			Itgam			Itgam			Zfp808			Itgam			Itgam			Itgam			Itgam
Ptchd4			Ptchd4			Ptchd4			Ptchd4			Ptchd4			Ptchd4			Ptchd4			Slc8a1			Ptchd4			Ptchd4			Ptchd4			Ptchd4
Haus4			Haus4			Haus4			Haus4			Haus4			Haus4			Haus4			Itgam			Haus4			Haus4			Haus4			Haus4
Nbl1			Nbl1			Nbl1			Nbl1			Nbl1			Nbl1			Nbl1			Ptchd4			Nbl1			Nbl1			Nbl1			Nbl1
Cxcl10			Cxcl10			Cxcl10			Cxcl10			Cxcl10			Cxcl10			Cxcl10			Haus4			Cxcl10			Cxcl10			Cxcl10			Cxcl10
Siah3			Siah3			Siah3			Siah3			Siah3			Siah3			Siah3			Nbl1			Siah3			Siah3			Siah3			Siah3
Car9			Car9			Car9			Car9			Car9			Car9			Car9			Cxcl10			Car9			Car9			Car9			Car9
Apoc1			Apoc1			Apoc1			Apoc1			Apoc1			Apoc1			Apoc1			Siah3			Apoc1			Apoc1			Apoc1			Apoc1
Nr6a1			Nr6a1			Nr6a1			Nr6a1			Nr6a1			Nr6a1			Nr6a1			Car9			Nr6a1			Nr6a1			Nr6a1			Nr6a1
Fam184b			Fam184b			Fam184b			Fam184b			Fam184b			Fam184b			Fam184b			Apoc1			Fam184b			Fam184b			Fam184b			Fam184b
Fam78b			Fam78b			Fam78b			Fam78b			Fam78b			Fam78b			Fam78b			Nr6a1			Fam78b			Fam78b			Fam78b			Fam78b
Gm14964			Gm14964			Gm14964			Gm14964			Gm14964			Gm14964			Gm14964			Fam184b			Gm14964			Gm14964			Gm14964			Gm14964
Rab20			Rab20			Rab20			Rab20			Rab20			Rab20			Rab20			Fam78b			Rab20			Rab20			Rab20			Rab20
Gm973			Gm973			Gm973			Gm973			Gm973			Gm973			Gm973			Gm14964			Gm973			Gm973			Gm973			Gm973
Gm20162			Gm20162			Gm20162			Gm20162			Gm20162			Gm20162			Gm20162			Rab20			Gm20162			Gm20162			Gm20162			Gm20162
Slc7a10			Slc7a10			Slc7a10			Slc7a10			Slc7a10			Slc7a10			Slc7a10			Gm973			Slc7a10			Slc7a10			Slc7a10			Slc7a10
Mir6236			Mir6236			Mir6236			Mir6236			Mir6236			Mir6236			Mir6236			Gm20162			Mir6236			Mir6236			Mir6236			Mir6236
Gm49555			Gm49555			Gm49555			Gm49555			Gm49555			Gm49555			Gm49555			Slc7a10			Gm49555			Gm49555			Gm49555			Gm49555
Vwa5a			Vwa5a			Vwa5a			Vwa5a			Vwa5a			Vwa5a			Vwa5a			Mir6236			Vwa5a			Vwa5a			Vwa5a			Vwa5a
Ctsc			Ctsc			Ctsc			Ctsc			Ctsc			Ctsc			Ctsc			Gm49555			Ctsc			Ctsc			Ctsc			Ctsc
5430403G16Rik			5430403G16Rik			5430403G16Rik			5430403G16Rik			5430403G16Rik			5430403G16Rik			5430403G16Rik			Vwa5a			5430403G16Rik			5430403G16Rik			5430403G16Rik			5430403G16Rik
Gm14636			Gm14636			Gm14636			Gm14636			Gm14636			Gm14636			Gm14636			Ctsc			Gm14636			Gm14636			Gm14636			Gm14636
Igsf21			Igsf21			Igsf21			Igsf21			Igsf21			Igsf21			Igsf21			5430403G16Rik			Igsf21			Igsf21			Igsf21			Igsf21
Nectin4			Nectin4			Nectin4			Nectin4			Nectin4			Nectin4			Nectin4			Gm14636			Nectin4			Nectin4			Nectin4			Nectin4
Gnb4			Gnb4			Gnb4			Gnb4			Gnb4			Gnb4			Gnb4			Igsf21			Gnb4			Gnb4			Gnb4			Gnb4
Gm36858			Gm36858			Gm36858			Gm36858			Gm36858			Gm36858			Gm36858			Nectin4			Gm36858			Gm36858			Gm36858			Gm36858
Laptm5			Laptm5			Laptm5			Laptm5			Laptm5			Laptm5			Laptm5			Gnb4			Laptm5			Laptm5			Laptm5			Laptm5
Tgtp2			Tgtp2			Tgtp2			Tgtp2			Tgtp2			Tgtp2			Tgtp2			Gm36858			Tgtp2			Tgtp2			Tgtp2			Tgtp2
Egr4			Egr4			Egr4			Egr4			Egr4			Egr4			Egr4			Laptm5			Egr4			Egr4			Egr4			Egr4
Serpinb1b			Serpinb1b			Serpinb1b			Serpinb1b			Serpinb1b			Serpinb1b			Serpinb1b			Tgtp2			Serpinb1b			Serpinb1b			Serpinb1b			Serpinb1b
Zfp703			Zfp703			Zfp703			Zfp703			Zfp703			Zfp703			Zfp703			Egr4			Zfp703			Zfp703			Zfp703			Zfp703
Zfp934			Zfp934			Zfp934			Zfp934			Zfp934			Zfp934			Zfp934			Serpinb1b			Zfp934			Zfp934			Zfp934			Zfp934
Cep135			Cep135			Cep135			Cep135			Cep135			Cep135			Cep135			Zfp703			Cep135			Cep135			Cep135			Cep135
Pcdhb8			Pcdhb8			Pcdhb8			Pcdhb8			Pcdhb8			Pcdhb8			Pcdhb8			Zfp934			Pcdhb8			Pcdhb8			Pcdhb8			Pcdhb8
Tifa			Tifa			Tifa			Tifa			Tifa			Tifa			Tifa			Cep135			Tifa			Tifa			Tifa			Tifa
Shisa5			Shisa5			Shisa5			Shisa5			Shisa5			Shisa5			Shisa5			Pcdhb8			Shisa5			Shisa5			Shisa5			Shisa5
Cyp2d22			Cyp2d22			Cyp2d22			Cyp2d22			Cyp2d22			Cyp2d22			Cyp2d22			Tifa			Cyp2d22			Cyp2d22			Cyp2d22			Cyp2d22
Cyb5r3			Cyb5r3			Cyb5r3			Cyb5r3			Cyb5r3			Cyb5r3			Cyb5r3			Shisa5			Cyb5r3			Cyb5r3			Cyb5r3			Cyb5r3
Them4			Them4			Them4			Them4			Them4			Them4			Them4			Cyp2d22			Them4			Them4			Them4			Them4
Gm3325			Gm3325			Gm3325			Gm3325			Gm3325			Gm3325			Gm3325			Cyb5r3			Gm3325			Gm3325			Gm3325			Gm3325
Itgb5			Itgb5			Itgb5			Itgb5			Itgb5			Itgb5			Itgb5			Them4			Itgb5			Itgb5			Itgb5			Itgb5
Aebp1			Aebp1			Aebp1			Aebp1			Aebp1			Aebp1			Aebp1			Gm3325			Aebp1			Aebp1			Aebp1			Aebp1
Zfp442			Zfp442			Zfp442			Zfp442			Zfp442			Zfp442			Zfp442			Itgb5			Zfp442			Zfp442			Zfp442			Zfp442
Garem2			Garem2			Garem2			Garem2			Garem2			Garem2			Garem2			Aebp1			Garem2			Garem2			Garem2			Garem2
Cdc14b			Cdc14b			Cdc14b			Cdc14b			Cdc14b			Cdc14b			Cdc14b			Zfp442			Cdc14b			Cdc14b			Cdc14b			Cdc14b
Stard5			Stard5			Stard5			Stard5			Stard5			Stard5			Stard5			Garem2			Stard5			Stard5			Stard5			Stard5
Trp53inp2			Trp53inp2			Trp53inp2			Trp53inp2			Trp53inp2			Trp53inp2			Trp53inp2			Cdc14b			Trp53inp2			Trp53inp2			Trp53inp2			Trp53inp2
Ltbp1			Ltbp1			Ltbp1			Ltbp1			Ltbp1			Ltbp1			Ltbp1			Stard5			Ltbp1			Ltbp1			Ltbp1			Ltbp1
Lpcat2			Lpcat2			Lpcat2			Lpcat2			Lpcat2			Lpcat2			Lpcat2			Trp53inp2			Lpcat2			Lpcat2			Lpcat2			Lpcat2
Slc9b2			Slc9b2			Slc9b2			Slc9b2			Slc9b2			Slc9b2			Slc9b2			Ltbp1			Slc9b2			Slc9b2			Slc9b2			Slc9b2
Atic			Atic			Atic			Atic			Atic			Atic			Atic			Lpcat2			Atic			Atic			Atic			Atic
Trim14			Trim14			Trim14			Trim14			Trim14			Trim14			Trim14			Slc9b2			Trim14			Trim14			Trim14			Trim14
Gm5086			Gm5086			Gm5086			Gm5086			Gm5086			Gm5086			Gm5086			Atic			Gm5086			Gm5086			Gm5086			Gm5086
Naip5			Naip5			Naip5			Naip5			Naip5			Naip5			Naip5			Trim14			Naip5			Naip5			Naip5			Naip5
H2-T10			H2-T10			H2-T10			H2-T10			H2-T10			H2-T10			H2-T10			Gm5086			H2-T10			H2-T10			H2-T10			H2-T10
9530026P05Rik			9530026P05Rik			9530026P05Rik			9530026P05Rik			9530026P05Rik			9530026P05Rik			9530026P05Rik			Naip5			9530026P05Rik			9530026P05Rik			9530026P05Rik			9530026P05Rik
Rara			Rara			Rara			Rara			Rara			Rara			Rara			H2-T10			Rara			Rara			Rara			Rara
Mal			Mal			Mal			Mal			Mal			Mal			Mal			9530026P05Rik			Mal			Mal			Mal			Mal
Cenpw			Cenpw			Cenpw			Cenpw			Cenpw			Cenpw			Cenpw			Rara			Cenpw			Cenpw			Cenpw			Cenpw
Htr1b			Htr1b			Htr1b			Htr1b			Htr1b			Htr1b			Htr1b			Mal			Htr1b			Htr1b			Htr1b			Htr1b
Gm2629			Gm2629			Gm2629			Gm2629			Gm2629			Gm2629			Gm2629			Cenpw			Gm2629			Gm2629			Gm2629			Gm2629
Cmpk2			Cmpk2			Cmpk2			Cmpk2			Cmpk2			Cmpk2			Cmpk2			Htr1b			Cmpk2			Cmpk2			Cmpk2			Cmpk2
Antkmt			Antkmt			Antkmt			Antkmt			Antkmt			Antkmt			Antkmt			Gm2629			Antkmt			Antkmt			Antkmt			Antkmt
Nupr1			Nupr1			Nupr1			Nupr1			Nupr1			Nupr1			Nupr1			Cmpk2			Nupr1			Nupr1			Nupr1			Nupr1
Egr1			Egr1			Egr1			Egr1			Egr1			Egr1			Egr1			Antkmt			Egr1			Egr1			Egr1			Egr1
Gm35040			Gm35040			Gm35040			Gm35040			Gm35040			Gm35040			Gm35040			Nupr1			Gm35040			Gm35040			Gm35040			Gm35040
Fgf11			Fgf11			Fgf11			Fgf11			Fgf11			Fgf11			Fgf11			Egr1			Fgf11			Fgf11			Fgf11			Fgf11
Ttyh3			Ttyh3			Ttyh3			Ttyh3			Ttyh3			Ttyh3			Ttyh3			Gm35040			Ttyh3			Ttyh3			Ttyh3			Ttyh3
Otulinl			Otulinl			Otulinl			Otulinl			Otulinl			Otulinl			Otulinl			Fgf11			Otulinl			Otulinl			Otulinl			Otulinl
Cdk16			Cdk16			Cdk16			Cdk16			Cdk16			Cdk16			Cdk16			Ttyh3			Cdk16			Cdk16			Cdk16			Cdk16
Icosl			Icosl			Icosl			Icosl			Icosl			Icosl			Icosl			Otulinl			Icosl			Icosl			Icosl			Icosl
Gm35101			Gm35101			Gm35101			Gm35101			Gm35101			Gm35101			Gm35101			Cdk16			Gm35101			Gm35101			Gm35101			Gm35101
Msrb3			Msrb3			Msrb3			Msrb3			Msrb3			Msrb3			Msrb3			Icosl			Msrb3			Msrb3			Msrb3			Msrb3
S1pr3			S1pr3			S1pr3			S1pr3			S1pr3			S1pr3			S1pr3			Gm35101			S1pr3			S1pr3			S1pr3			S1pr3
Rasal1			Rasal1			Rasal1			Rasal1			Rasal1			Rasal1			Rasal1			Msrb3			Rasal1			Rasal1			Rasal1			Rasal1
Gm42722			Gm42722			Gm42722			Gm42722			Gm42722			Gm42722			Gm42722			S1pr3			Gm42722			Gm42722			Gm42722			Gm42722
Neu2			Neu2			Neu2			Neu2			Neu2			Neu2			Neu2			Rasal1			Neu2			Neu2			Neu2			Neu2
Fgd2			Fgd2			Fgd2			Fgd2			Fgd2			Fgd2			Fgd2			Gm42722			Fgd2			Fgd2			Fgd2			Fgd2
Uba7			Uba7			Uba7			Uba7			Uba7			Uba7			Uba7			Neu2			Uba7			Uba7			Uba7			Uba7
Gabbr2			Gabbr2			Gabbr2			Gabbr2			Gabbr2			Gabbr2			Gabbr2			Fgd2			Gabbr2			Gabbr2			Gabbr2			Gabbr2
Atf3			Atf3			Atf3			Atf3			Atf3			Atf3			Atf3			Uba7			Atf3			Atf3			Atf3			Atf3
Vsir			Vsir			Vsir			Vsir			Vsir			Vsir			Vsir			Gabbr2			Vsir			Vsir			Vsir			Vsir
Ky			Ky			Ky			Ky			Ky			Ky			Ky			Atf3			Ky			Ky			Ky			Ky
Naip6			Naip6			Naip6			Naip6			Naip6			Naip6			Naip6			Vsir			Naip6			Naip6			Naip6			Naip6
Csf2rb			Csf2rb			Csf2rb			Csf2rb			Csf2rb			Csf2rb			Csf2rb			Ky			Csf2rb			Csf2rb			Csf2rb			Csf2rb
Spi1			Spi1			Spi1			Spi1			Spi1			Spi1			Spi1			Naip6			Spi1			Spi1			Spi1			Spi1
Tspo			Tspo			Tspo			Tspo			Tspo			Tspo			Tspo			Csf2rb			Tspo			Tspo			Tspo			Tspo
Gm12122			Gm12122			Gm12122			Gm12122			Gm12122			Gm12122			Gm12122			Spi1			Gm12122			Gm12122			Gm12122			Gm12122
Nt5dc3			Nt5dc3			Nt5dc3			Nt5dc3			Nt5dc3			Nt5dc3			Nt5dc3			Tspo			Nt5dc3			Nt5dc3			Nt5dc3			Nt5dc3
Sord			Sord			Sord			Sord			Sord			Sord			Sord			Gm12122			Sord			Sord			Sord			Sord
Gm44763			Gm44763			Gm44763			Gm44763			Gm44763			Gm44763			Gm44763			Nt5dc3			Gm44763			Gm44763			Gm44763			Gm44763
Slc6a9			Slc6a9			Slc6a9			Slc6a9			Slc6a9			Slc6a9			Slc6a9			Sord			Slc6a9			Slc6a9			Slc6a9			Slc6a9
Sash3			Sash3			Sash3			Sash3			Sash3			Sash3			Sash3			Gm44763			Sash3			Sash3			Sash3			Sash3
H2-Ob			H2-Ob			H2-Ob			H2-Ob			H2-Ob			H2-Ob			H2-Ob			Slc6a9			H2-Ob			H2-Ob			H2-Ob			H2-Ob
Btk			Btk			Btk			Btk			Btk			Btk			Btk			Sash3			Btk			Btk			Btk			Btk
5330434G04Rik			5330434G04Rik			5330434G04Rik			5330434G04Rik			5330434G04Rik			5330434G04Rik			5330434G04Rik			H2-Ob			5330434G04Rik			5330434G04Rik			5330434G04Rik			5330434G04Rik
Aff3			Aff3			Aff3			Aff3			Aff3			Aff3			Aff3			Btk			Aff3			Aff3			Aff3			Aff3
Psmb10			Psmb10			Psmb10			Psmb10			Psmb10			Psmb10			Psmb10			5330434G04Rik			Psmb10			Psmb10			Psmb10			Psmb10
Erbb4			Erbb4			Erbb4			Erbb4			Erbb4			Erbb4			Erbb4			Aff3			Erbb4			Erbb4			Erbb4			Erbb4
Il22b			Il22b			Il22b			Il22b			Il22b			Il22b			Il22b			Psmb10			Il22b			Il22b			Il22b			Il22b
Csmd1			Csmd1			Csmd1			Csmd1			Csmd1			Csmd1			Csmd1			Erbb4			Csmd1			Csmd1			Csmd1			Csmd1
Itgb7			Itgb7			Itgb7			Itgb7			Itgb7			Itgb7			Itgb7			Il22b			Itgb7			Itgb7			Itgb7			Itgb7
Ms4a7			Ms4a7			Ms4a7			Ms4a7			Ms4a7			Ms4a7			Ms4a7			Csmd1			Ms4a7			Ms4a7			Ms4a7			Ms4a7
Serpinb6a			Serpinb6a			Serpinb6a			Serpinb6a			Serpinb6a			Serpinb6a			Serpinb6a			Itgb7			Serpinb6a			Serpinb6a			Serpinb6a			Serpinb6a
Smoc1			Smoc1			Smoc1			Smoc1			Smoc1			Smoc1			Smoc1			Ms4a7			Smoc1			Smoc1			Smoc1			Smoc1
Eml1			Eml1			Eml1			Eml1			Eml1			Eml1			Eml1			Serpinb6a			Eml1			Eml1			Eml1			Eml1
Parp10			Parp10			Parp10			Parp10			Parp10			Parp10			Parp10			Smoc1			Parp10			Parp10			Parp10			Parp10
Ano5			Ano5			Ano5			Ano5			Ano5			Ano5			Ano5			Eml1			Ano5			Ano5			Ano5			Ano5
Mmp16			Mmp16			Mmp16			Mmp16			Mmp16			Mmp16			Mmp16			Parp10			Mmp16			Mmp16			Mmp16			Mmp16
Alpk1			Alpk1			Alpk1			Alpk1			Alpk1			Alpk1			Alpk1			Ano5			Alpk1			Alpk1			Alpk1			Alpk1
Slc6a20a			Slc6a20a			Slc6a20a			Slc6a20a			Slc6a20a			Slc6a20a			Slc6a20a			Mmp16			Slc6a20a			Slc6a20a			Slc6a20a			Slc6a20a
Tshz3			Tshz3			Tshz3			Tshz3			Tshz3			Tshz3			Tshz3			Alpk1			Tshz3			Tshz3			Tshz3			Tshz3
Fut10			Fut10			Fut10			Fut10			Fut10			Fut10			Fut10			Slc6a20a			Fut10			Fut10			Fut10			Fut10
Gm43197			Gm43197			Gm43197			Gm43197			Gm43197			Gm43197			Gm43197			Tshz3			Gm43197			Gm43197			Gm43197			Gm43197
Traf3			Traf3			Traf3			Traf3			Traf3			Traf3			Traf3			Fut10			Traf3			Traf3			Traf3			Traf3
Zfp462			Zfp462			Zfp462			Zfp462			Zfp462			Zfp462			Zfp462			Gm43197			Zfp462			Zfp462			Zfp462			Zfp462
Abi3			Abi3			Abi3			Abi3			Abi3			Abi3			Abi3			Traf3			Abi3			Abi3			Abi3			Abi3
Slc13a4			Slc13a4			Slc13a4			Slc13a4			Slc13a4			Slc13a4			Slc13a4			Zfp462			Slc13a4			Slc13a4			Slc13a4			Slc13a4
Kctd12			Kctd12			Kctd12			Kctd12			Kctd12			Kctd12			Kctd12			Abi3			Kctd12			Kctd12			Kctd12			Kctd12
Penk			Penk			Penk			Penk			Penk			Penk			Penk			Slc13a4			Penk			Penk			Penk			Penk
5930438M14Rik			5930438M14Rik			5930438M14Rik			5930438M14Rik			5930438M14Rik			5930438M14Rik			5930438M14Rik			Kctd12			5930438M14Rik			5930438M14Rik			5930438M14Rik			5930438M14Rik
Gng12			Gng12			Gng12			Gng12			Gng12			Gng12			Gng12			Penk			Gng12			Gng12			Gng12			Gng12
3110080E11Rik			3110080E11Rik			3110080E11Rik			3110080E11Rik			3110080E11Rik			3110080E11Rik			3110080E11Rik			5930438M14Rik			3110080E11Rik			3110080E11Rik			3110080E11Rik			3110080E11Rik
Mxra7			Mxra7			Mxra7			Mxra7			Mxra7			Mxra7			Mxra7			Gng12			Mxra7			Mxra7			Mxra7			Mxra7
Epn3			Epn3			Epn3			Epn3			Epn3			Epn3			Epn3			3110080E11Rik			Epn3			Epn3			Epn3			Epn3
Depp1			Depp1			Depp1			Depp1			Depp1			Depp1			Depp1			Mxra7			Depp1			Depp1			Depp1			Depp1
Slco2a1			Slco2a1			Slco2a1			Slco2a1			Slco2a1			Slco2a1			Slco2a1			Epn3			Slco2a1			Slco2a1			Slco2a1			Slco2a1
Gm18150			Gm18150			Gm18150			Gm18150			Gm18150			Gm18150			Gm18150			Depp1			Gm18150			Gm18150			Gm18150			Gm18150
Kcnq2			Kcnq2			Kcnq2			Kcnq2			Kcnq2			Kcnq2			Kcnq2			Slco2a1			Kcnq2			Kcnq2			Kcnq2			Kcnq2
Irf6			Irf6			Irf6			Irf6			Irf6			Irf6			Irf6			Gm18150			Irf6			Irf6			Irf6			Irf6
Bbs9			Bbs9			Bbs9			Bbs9			Bbs9			Bbs9			Bbs9			Kcnq2			Bbs9			Bbs9			Bbs9			Bbs9
Fbxo41			Fbxo41			Fbxo41			Fbxo41			Fbxo41			Fbxo41			Fbxo41			Irf6			Fbxo41			Fbxo41			Fbxo41			Fbxo41
Serpinb9			Serpinb9			Serpinb9			Serpinb9			Serpinb9			Serpinb9			Serpinb9			Bbs9			Serpinb9			Serpinb9			Serpinb9			Serpinb9
Gprc5b			Gprc5b			Gprc5b			Gprc5b			Gprc5b			Gprc5b			Gprc5b			Fbxo41			Gprc5b			Gprc5b			Gprc5b			Gprc5b
Ldlrap1			Ldlrap1			Ldlrap1			Ldlrap1			Ldlrap1			Ldlrap1			Ldlrap1			Serpinb9			Ldlrap1			Ldlrap1			Ldlrap1			Ldlrap1
Satb1			Satb1			Satb1			Satb1			Satb1			Satb1			Satb1			Gprc5b			Satb1			Satb1			Satb1			Satb1
Grb10			Grb10			Grb10			Grb10			Grb10			Grb10			Grb10			Ldlrap1			Grb10			Grb10			Grb10			Grb10
Hbegf			Hbegf			Hbegf			Hbegf			Hbegf			Hbegf			Hbegf			Satb1			Hbegf			Hbegf			Hbegf			Hbegf
Gm19035			Gm19035			Gm19035			Gm19035			Gm19035			Gm19035			Gm19035			Grb10			Gm19035			Gm19035			Gm19035			Gm19035
Mxra8			Mxra8			Mxra8			Mxra8			Mxra8			Mxra8			Mxra8			Hbegf			Mxra8			Mxra8			Mxra8			Mxra8
Stx11			Stx11			Stx11			Stx11			Stx11			Stx11			Stx11			Gm19035			Stx11			Stx11			Stx11			Stx11
Ptafr			Ptafr			Ptafr			Ptafr			Ptafr			Ptafr			Ptafr			Mxra8			Ptafr			Ptafr			Ptafr			Ptafr
Plscr2			Plscr2			Plscr2			Plscr2			Plscr2			Plscr2			Plscr2			Stx11			Plscr2			Plscr2			Plscr2			Plscr2
Ass1			Ass1			Ass1			Ass1			Ass1			Ass1			Ass1			Ptafr			Ass1			Ass1			Ass1			Ass1
Psme1			Psme1			Psme1			Psme1			Psme1			Psme1			Psme1			Plscr2			Psme1			Psme1			Psme1			Psme1
Hba-a2			Hba-a2			Hba-a2			Hba-a2			Hba-a2			Hba-a2			Hba-a2			Ass1			Hba-a2			Hba-a2			Hba-a2			Hba-a2
Vegfc			Vegfc			Vegfc			Vegfc			Vegfc			Vegfc			Vegfc			Psme1			Vegfc			Vegfc			Vegfc			Vegfc
Cntln			Cntln			Cntln			Cntln			Cntln			Cntln			Cntln			Hba-a2			Cntln			Cntln			Cntln			Cntln
Mndal			Mndal			Mndal			Mndal			Mndal			Mndal			Mndal			Vegfc			Mndal			Mndal			Mndal			Mndal
9530082P21Rik			9530082P21Rik			9530082P21Rik			9530082P21Rik			9530082P21Rik			9530082P21Rik			9530082P21Rik			Cntln			9530082P21Rik			9530082P21Rik			9530082P21Rik			9530082P21Rik
Dapp1			Dapp1			Dapp1			Dapp1			Dapp1			Dapp1			Dapp1			Mndal			Dapp1			Dapp1			Dapp1			Dapp1
Tnfrsf1a			Tnfrsf1a			Tnfrsf1a			Tnfrsf1a			Tnfrsf1a			Tnfrsf1a			Tnfrsf1a			9530082P21Rik			Tnfrsf1a			Tnfrsf1a			Tnfrsf1a			Tnfrsf1a
Fam221a			Fam221a			Fam221a			Fam221a			Fam221a			Fam221a			Fam221a			Dapp1			Fam221a			Fam221a			Fam221a			Fam221a
Kcnj6			Kcnj6			Kcnj6			Kcnj6			Kcnj6			Kcnj6			Kcnj6			Tnfrsf1a			Kcnj6			Kcnj6			Kcnj6			Kcnj6
Lgr5			Lgr5			Lgr5			Lgr5			Lgr5			Lgr5			Lgr5			Fam221a			Lgr5			Lgr5			Lgr5			Lgr5
Necab1			Necab1			Necab1			Necab1			Necab1			Necab1			Necab1			Kcnj6			Necab1			Necab1			Necab1			Necab1
Mdfic			Mdfic			Mdfic			Mdfic			Mdfic			Mdfic			Mdfic			Lgr5			Mdfic			Mdfic			Mdfic			Mdfic
Gm26397			Gm26397			Gm26397			Gm26397			Gm26397			Gm26397			Gm26397			Necab1			Gm26397			Gm26397			Gm26397			Gm26397
Hjurp			Hjurp			Hjurp			Hjurp			Hjurp			Hjurp			Hjurp			Mdfic			Hjurp			Hjurp			Hjurp			Hjurp
Ddx25			Ddx25			Ddx25			Ddx25			Ddx25			Ddx25			Ddx25			Gm26397			Ddx25			Ddx25			Ddx25			Ddx25
Timp1			Timp1			Timp1			Timp1			Timp1			Timp1			Timp1			Hjurp			Timp1			Timp1			Timp1			Timp1
Iqgap2			Iqgap2			Iqgap2			Iqgap2			Iqgap2			Iqgap2			Iqgap2			Ddx25			Iqgap2			Iqgap2			Iqgap2			Iqgap2
Hk3			Hk3			Hk3			Hk3			Hk3			Hk3			Hk3			Timp1			Hk3			Hk3			Hk3			Hk3
Runx1			Runx1			Runx1			Runx1			Runx1			Runx1			Runx1			Iqgap2			Runx1			Runx1			Runx1			Runx1
Lingo3			Lingo3			Lingo3			Lingo3			Lingo3			Lingo3			Lingo3			Hk3			Lingo3			Lingo3			Lingo3			Lingo3
Gpx3			Gpx3			Gpx3			Gpx3			Gpx3			Gpx3			Gpx3			Runx1			Gpx3			Gpx3			Gpx3			Gpx3
Kazn			Kazn			Kazn			Kazn			Kazn			Kazn			Kazn			Lingo3			Kazn			Kazn			Kazn			Kazn
Vipr2			Vipr2			Vipr2			Vipr2			Vipr2			Vipr2			Vipr2			Gpx3			Vipr2			Vipr2			Vipr2			Vipr2
Exoc3l4			Exoc3l4			Exoc3l4			Exoc3l4			Exoc3l4			Exoc3l4			Exoc3l4			Kazn			Exoc3l4			Exoc3l4			Exoc3l4			Exoc3l4
Kndc1			Kndc1			Kndc1			Kndc1			Kndc1			Kndc1			Kndc1			Vipr2			Kndc1			Kndc1			Kndc1			Kndc1
Rims4			Rims4			Rims4			Rims4			Rims4			Rims4			Rims4			Exoc3l4			Rims4			Rims4			Rims4			Rims4
Serhl			Serhl			Serhl			Serhl			Serhl			Serhl			Serhl			Kndc1			Serhl			Serhl			Serhl			Serhl
Nol3			Nol3			Nol3			Nol3			Nol3			Nol3			Nol3			Rims4			Nol3			Nol3			Nol3			Nol3
Spdya			Spdya			Spdya			Spdya			Spdya			Spdya			Spdya			Serhl			Spdya			Spdya			Spdya			Spdya
A330076C08Rik			A330076C08Rik			A330076C08Rik			A330076C08Rik			A330076C08Rik			A330076C08Rik			A330076C08Rik			Nol3			A330076C08Rik			A330076C08Rik			A330076C08Rik			A330076C08Rik
Lingo1			Lingo1			Lingo1			Lingo1			Lingo1			Lingo1			Lingo1			Spdya			Lingo1			Lingo1			Lingo1			Lingo1
Bdh2			Bdh2			Bdh2			Bdh2			Bdh2			Bdh2			Bdh2			A330076C08Rik			Bdh2			Bdh2			Bdh2			Bdh2
Csmd3			Csmd3			Csmd3			Csmd3			Csmd3			Csmd3			Csmd3			Lingo1			Csmd3			Csmd3			Csmd3			Csmd3
Hes6			Hes6			Hes6			Hes6			Hes6			Hes6			Hes6			Bdh2			Hes6			Hes6			Hes6			Hes6
Fbln5			Fbln5			Fbln5			Fbln5			Fbln5			Fbln5			Fbln5			Csmd3			Fbln5			Fbln5			Fbln5			Fbln5
Cbx6			Cbx6			Cbx6			Cbx6			Cbx6			Cbx6			Cbx6			Hes6			Cbx6			Cbx6			Cbx6			Cbx6
Lamp2			Lamp2			Lamp2			Lamp2			Lamp2			Lamp2			Lamp2			Fbln5			Lamp2			Lamp2			Lamp2			Lamp2
Arhgap20			Arhgap20			Arhgap20			Arhgap20			Arhgap20			Arhgap20			Arhgap20			Cbx6			Arhgap20			Arhgap20			Arhgap20			Arhgap20
Vat1			Vat1			Vat1			Vat1			Vat1			Vat1			Vat1			Lamp2			Vat1			Vat1			Vat1			Vat1
Kcna2			Kcna2			Kcna2			Kcna2			Kcna2			Kcna2			Kcna2			Arhgap20			Kcna2			Kcna2			Kcna2			Kcna2
Rab32			Rab32			Rab32			Rab32			Rab32			Rab32			Rab32			Vat1			Rab32			Rab32			Rab32			Rab32
Adamts5			Adamts5			Adamts5			Adamts5			Adamts5			Adamts5			Adamts5			Kcna2			Adamts5			Adamts5			Adamts5			Adamts5
Hmgb2			Hmgb2			Hmgb2			Hmgb2			Hmgb2			Hmgb2			Hmgb2			Rab32			Hmgb2			Hmgb2			Hmgb2			Hmgb2
Nav3			Nav3			Nav3			Nav3			Nav3			Nav3			Nav3			Adamts5			Nav3			Nav3			Nav3			Nav3
Gm38101			Gm38101			Gm38101			Gm38101			Gm38101			Gm38101			Gm38101			Hmgb2			Gm38101			Gm38101			Gm38101			Gm38101
Nlrp1c-ps			Nlrp1c-ps			Nlrp1c-ps			Nlrp1c-ps			Nlrp1c-ps			Nlrp1c-ps			Nlrp1c-ps			Nav3			Nlrp1c-ps			Nlrp1c-ps			Nlrp1c-ps			Nlrp1c-ps
Gm536			Gm536			Gm536			Gm536			Gm536			Gm536			Gm536			Gm38101			Gm536			Gm536			Gm536			Gm536
Lhfpl4			Lhfpl4			Lhfpl4			Lhfpl4			Lhfpl4			Lhfpl4			Lhfpl4			Nlrp1c-ps			Lhfpl4			Lhfpl4			Lhfpl4			Lhfpl4
Phldb2			Phldb2			Phldb2			Phldb2			Phldb2			Phldb2			Phldb2			Gm536			Phldb2			Phldb2			Phldb2			Phldb2
Zkscan16			Zkscan16			Zkscan16			Zkscan16			Zkscan16			Zkscan16			Zkscan16			Lhfpl4			Zkscan16			Zkscan16			Zkscan16			Zkscan16
Trip10			Trip10			Trip10			Trip10			Trip10			Trip10			Trip10			Phldb2			Trip10			Trip10			Trip10			Trip10
Tmem255a			Tmem255a			Tmem255a			Tmem255a			Tmem255a			Tmem255a			Tmem255a			Zkscan16			Tmem255a			Tmem255a			Tmem255a			Tmem255a
Smpdl3b			Smpdl3b			Smpdl3b			Smpdl3b			Smpdl3b			Smpdl3b			Smpdl3b			Trip10			Smpdl3b			Smpdl3b			Smpdl3b			Smpdl3b
Calhm5			Calhm5			Calhm5			Calhm5			Calhm5			Calhm5			Calhm5			Tmem255a			Calhm5			Calhm5			Calhm5			Calhm5
Adgrv1			Adgrv1			Adgrv1			Adgrv1			Adgrv1			Adgrv1			Adgrv1			Smpdl3b			Adgrv1			Adgrv1			Adgrv1			Adgrv1
Gm24119			Gm24119			Gm24119			Gm24119			Gm24119			Gm24119			Gm24119			Calhm5			Gm24119			Gm24119			Gm24119			Gm24119
E230020A03Rik			E230020A03Rik			E230020A03Rik			E230020A03Rik			E230020A03Rik			E230020A03Rik			E230020A03Rik			Adgrv1			E230020A03Rik			E230020A03Rik			E230020A03Rik			E230020A03Rik
Pcdhgb6			Pcdhgb6			Pcdhgb6			Pcdhgb6			Pcdhgb6			Pcdhgb6			Pcdhgb6			Gm24119			Pcdhgb6			Pcdhgb6			Pcdhgb6			Pcdhgb6
Dcn			Dcn			Dcn			Dcn			Dcn			Dcn			Dcn			E230020A03Rik			Dcn			Dcn			Dcn			Dcn
Postn			Postn			Postn			Postn			Postn			Postn			Postn			Pcdhgb6			Postn			Postn			Postn			Postn
P2ry6			P2ry6			P2ry6			P2ry6			P2ry6			P2ry6			P2ry6			Dcn			P2ry6			P2ry6			P2ry6			P2ry6
Ergic1			Ergic1			Ergic1			Ergic1			Ergic1			Ergic1			Ergic1			Postn			Ergic1			Ergic1			Ergic1			Ergic1
Snora73b			Snora73b			Snora73b			Snora73b			Snora73b			Snora73b			Snora73b			P2ry6			Snora73b			Snora73b			Snora73b			Snora73b
Spata2l			Spata2l			Spata2l			Spata2l			Spata2l			Spata2l			Spata2l			Ergic1			Spata2l			Spata2l			Spata2l			Spata2l
Slitrk3			Slitrk3			Slitrk3			Slitrk3			Slitrk3			Slitrk3			Slitrk3			Snora73b			Slitrk3			Slitrk3			Slitrk3			Slitrk3
Mir670hg			Mir670hg			Mir670hg			Mir670hg			Mir670hg			Mir670hg			Mir670hg			Spata2l			Mir670hg			Mir670hg			Mir670hg			Mir670hg
Gm12250			Gm12250			Gm12250			Gm12250			Gm12250			Gm12250			Gm12250			Slitrk3			Gm12250			Gm12250			Gm12250			Gm12250
Arpc1b			Arpc1b			Arpc1b			Arpc1b			Arpc1b			Arpc1b			Arpc1b			Mir670hg			Arpc1b			Arpc1b			Arpc1b			Arpc1b
Aldh2			Aldh2			Aldh2			Aldh2			Aldh2			Aldh2			Aldh2			Gm12250			Aldh2			Aldh2			Aldh2			Aldh2
Colq			Colq			Colq			Colq			Colq			Colq			Colq			Arpc1b			Colq			Colq			Colq			Colq
Ercc6l2			Ercc6l2			Ercc6l2			Ercc6l2			Ercc6l2			Ercc6l2			Ercc6l2			Aldh2			Ercc6l2			Ercc6l2			Ercc6l2			Ercc6l2
Cep70			Cep70			Cep70			Cep70			Cep70			Cep70			Cep70			Colq			Cep70			Cep70			Cep70			Cep70
Emid1			Emid1			Emid1			Emid1			Emid1			Emid1			Emid1			Ercc6l2			Emid1			Emid1			Emid1			Emid1
Vat1l			Vat1l			Vat1l			Vat1l			Vat1l			Vat1l			Vat1l			Cep70			Vat1l			Vat1l			Vat1l			Vat1l
Gm26448			Gm26448			Gm26448			Gm26448			Gm26448			Gm26448			Gm26448			Emid1			Gm26448			Gm26448			Gm26448			Gm26448
Tmem176a			Tmem176a			Tmem176a			Tmem176a			Tmem176a			Tmem176a			Tmem176a			Vat1l			Tmem176a			Tmem176a			Tmem176a			Tmem176a
Tmco4			Tmco4			Tmco4			Tmco4			Tmco4			Tmco4			Tmco4			Gm26448			Tmco4			Tmco4			Tmco4			Tmco4
Hectd2			Hectd2			Hectd2			Hectd2			Hectd2			Hectd2			Hectd2			Tmem176a			Hectd2			Hectd2			Hectd2			Hectd2
Gm10530			Gm10530			Gm10530			Gm10530			Gm10530			Gm10530			Gm10530			Tmco4			Gm10530			Gm10530			Gm10530			Gm10530
Vps13a			Vps13a			Vps13a			Vps13a			Vps13a			Vps13a			Vps13a			Hectd2			Vps13a			Vps13a			Vps13a			Vps13a
Ncor2			Ncor2			Ncor2			Ncor2			Ncor2			Ncor2			Ncor2			Gm10530			Ncor2			Ncor2			Ncor2			Ncor2
Elf2			Elf2			Elf2			Elf2			Elf2			Elf2			Elf2			Vps13a			Elf2			Elf2			Elf2			Elf2
Apcdd1			Apcdd1			Apcdd1			Apcdd1			Apcdd1			Apcdd1			Apcdd1			Ncor2			Apcdd1			Apcdd1			Apcdd1			Apcdd1
Atxn7l3b			Atxn7l3b			Atxn7l3b			Atxn7l3b			Atxn7l3b			Atxn7l3b			Atxn7l3b			Elf2			Atxn7l3b			Atxn7l3b			Atxn7l3b			Atxn7l3b
Ifit1bl2			Ifit1bl2			Ifit1bl2			Ifit1bl2			Ifit1bl2			Ifit1bl2			Ifit1bl2			Apcdd1			Ifit1bl2			Ifit1bl2			Ifit1bl2			Ifit1bl2
Chil1			Chil1			Chil1			Chil1			Chil1			Chil1			Chil1			Atxn7l3b			Chil1			Chil1			Chil1			Chil1
Ube2cbp			Ube2cbp			Ube2cbp			Ube2cbp			Ube2cbp			Ube2cbp			Ube2cbp			Ifit1bl2			Ube2cbp			Ube2cbp			Ube2cbp			Ube2cbp
Maneal			Maneal			Maneal			Maneal			Maneal			Maneal			Maneal			Chil1			Maneal			Maneal			Maneal			Maneal
Lrrc3b			Lrrc3b			Lrrc3b			Lrrc3b			Lrrc3b			Lrrc3b			Lrrc3b			Ube2cbp			Lrrc3b			Lrrc3b			Lrrc3b			Lrrc3b
Kiz			Kiz			Kiz			Kiz			Kiz			Kiz			Kiz			Maneal			Kiz			Kiz			Kiz			Kiz
Ccdc122			Ccdc122			Ccdc122			Ccdc122			Ccdc122			Ccdc122			Ccdc122			Lrrc3b			Ccdc122			Ccdc122			Ccdc122			Ccdc122
Atp6v1g2			Atp6v1g2			Atp6v1g2			Atp6v1g2			Atp6v1g2			Atp6v1g2			Atp6v1g2			Kiz			Atp6v1g2			Atp6v1g2			Atp6v1g2			Atp6v1g2
Spon1			Spon1			Spon1			Spon1			Spon1			Spon1			Spon1			Ccdc122			Spon1			Spon1			Spon1			Spon1
Ctxn2			Ctxn2			Ctxn2			Ctxn2			Ctxn2			Ctxn2			Ctxn2			Atp6v1g2			Ctxn2			Ctxn2			Ctxn2			Ctxn2
mt-Nd2			mt-Nd2			mt-Nd2			mt-Nd2			mt-Nd2			mt-Nd2			mt-Nd2			Spon1			mt-Nd2			mt-Nd2			mt-Nd2			mt-Nd2
Cracr2b			Cracr2b			Cracr2b			Cracr2b			Cracr2b			Cracr2b			Cracr2b			Ctxn2			Cracr2b			Cracr2b			Cracr2b			Cracr2b
Il1a			Il1a			Il1a			Il1a			Il1a			Il1a			Il1a			mt-Nd2			Il1a			Il1a			Il1a			Il1a
Mocos			Mocos			Mocos			Mocos			Mocos			Mocos			Mocos			Cracr2b			Mocos			Mocos			Mocos			Mocos
Kcnj10			Kcnj10			Kcnj10			Kcnj10			Kcnj10			Kcnj10			Kcnj10			Il1a			Kcnj10			Kcnj10			Kcnj10			Kcnj10
4833422M21Rik			4833422M21Rik			4833422M21Rik			4833422M21Rik			4833422M21Rik			4833422M21Rik			4833422M21Rik			Mocos			4833422M21Rik			4833422M21Rik			4833422M21Rik			4833422M21Rik
Oas1c			Oas1c			Oas1c			Oas1c			Oas1c			Oas1c			Oas1c			Kcnj10			Oas1c			Oas1c			Oas1c			Oas1c
Ttc9			Ttc9			Ttc9			Ttc9			Ttc9			Ttc9			Ttc9			4833422M21Rik			Ttc9			Ttc9			Ttc9			Ttc9
Prrg3			Prrg3			Prrg3			Prrg3			Prrg3			Prrg3			Prrg3			Oas1c			Prrg3			Prrg3			Prrg3			Prrg3
Olfr1372-ps1			Olfr1372-ps1			Olfr1372-ps1			Olfr1372-ps1			Olfr1372-ps1			Olfr1372-ps1			Olfr1372-ps1			Ttc9			Olfr1372-ps1			Olfr1372-ps1			Olfr1372-ps1			Olfr1372-ps1
Abca8b			Abca8b			Abca8b			Abca8b			Abca8b			Abca8b			Abca8b			Prrg3			Abca8b			Abca8b			Abca8b			Abca8b
Tle3			Tle3			Tle3			Tle3			Tle3			Tle3			Tle3			Olfr1372-ps1			Tle3			Tle3			Tle3			Tle3
Gm16425			Gm16425			Gm16425			Gm16425			Gm16425			Gm16425			Gm16425			Abca8b			Gm16425			Gm16425			Gm16425			Gm16425
Gngt2			Gngt2			Gngt2			Gngt2			Gngt2			Gngt2			Gngt2			Tle3			Gngt2			Gngt2			Gngt2			Gngt2
Zmat3			Zmat3			Zmat3			Zmat3			Zmat3			Zmat3			Zmat3			Gm16425			Zmat3			Zmat3			Zmat3			Zmat3
Plxnd1			Plxnd1			Plxnd1			Plxnd1			Plxnd1			Plxnd1			Plxnd1			Gngt2			Plxnd1			Plxnd1			Plxnd1			Plxnd1
Tasl			Tasl			Tasl			Tasl			Tasl			Tasl			Tasl			Zmat3			Tasl			Tasl			Tasl			Tasl
Cd44			Cd44			Cd44			Cd44			Cd44			Cd44			Cd44			Plxnd1			Cd44			Cd44			Cd44			Cd44
Gbp11			Gbp11			Gbp11			Gbp11			Gbp11			Gbp11			Gbp11			Tasl			Gbp11			Gbp11			Gbp11			Gbp11
Irag2			Irag2			Irag2			Irag2			Irag2			Irag2			Irag2			Cd44			Irag2			Irag2			Irag2			Irag2
Eef1a1-ps1			Eef1a1-ps1			Eef1a1-ps1			Eef1a1-ps1			Eef1a1-ps1			Eef1a1-ps1			Eef1a1-ps1			Gbp11			Eef1a1-ps1			Eef1a1-ps1			Eef1a1-ps1			Eef1a1-ps1
mt-Nd4			mt-Nd4			mt-Nd4			mt-Nd4			mt-Nd4			mt-Nd4			mt-Nd4			Irag2			mt-Nd4			mt-Nd4			mt-Nd4			mt-Nd4
Mthfd1l			Mthfd1l			Mthfd1l			Mthfd1l			Mthfd1l			Mthfd1l			Mthfd1l			Eef1a1-ps1			Mthfd1l			Mthfd1l			Mthfd1l			Mthfd1l
Pcdhga6			Pcdhga6			Pcdhga6			Pcdhga6			Pcdhga6			Pcdhga6			Pcdhga6			mt-Nd4			Pcdhga6			Pcdhga6			Pcdhga6			Pcdhga6
Fam111a			Fam111a			Fam111a			Fam111a			Fam111a			Fam111a			Fam111a			Mthfd1l			Fam111a			Fam111a			Fam111a			Fam111a
mt-Tm			mt-Tm			mt-Tm			mt-Tm			mt-Tm			mt-Tm			mt-Tm			Pcdhga6			mt-Tm			mt-Tm			mt-Tm			mt-Tm
Trim56			Trim56			Trim56			Trim56			Trim56			Trim56			Trim56			Fam111a			Trim56			Trim56			Trim56			Trim56
Dpyd			Dpyd			Dpyd			Dpyd			Dpyd			Dpyd			Dpyd			mt-Tm			Dpyd			Dpyd			Dpyd			Dpyd
Syn1			Syn1			Syn1			Syn1			Syn1			Syn1			Syn1			Trim56			Syn1			Syn1			Syn1			Syn1
Robo1			Robo1			Robo1			Robo1			Robo1			Robo1			Robo1			Dpyd			Robo1			Robo1			Robo1			Robo1
Tlr3			Tlr3			Tlr3			Tlr3			Tlr3			Tlr3			Tlr3			Syn1			Tlr3			Tlr3			Tlr3			Tlr3
Col3a1			Col3a1			Col3a1			Col3a1			Col3a1			Col3a1			Col3a1			Robo1			Col3a1			Col3a1			Col3a1			Col3a1
Ugt8a			Ugt8a			Ugt8a			Ugt8a			Ugt8a			Ugt8a			Ugt8a			Tlr3			Ugt8a			Ugt8a			Ugt8a			Ugt8a
Kcnk6			Kcnk6			Kcnk6			Kcnk6			Kcnk6			Kcnk6			Kcnk6			Col3a1			Kcnk6			Kcnk6			Kcnk6			Kcnk6
Mfsd2a			Mfsd2a			Mfsd2a			Mfsd2a			Mfsd2a			Mfsd2a			Mfsd2a			Ugt8a			Mfsd2a			Mfsd2a			Mfsd2a			Mfsd2a
Serinc2			Serinc2			Serinc2			Serinc2			Serinc2			Serinc2			Serinc2			Kcnk6			Serinc2			Serinc2			Serinc2			Serinc2
H2-Ab1			H2-Ab1			H2-Ab1			H2-Ab1			H2-Ab1			H2-Ab1			H2-Ab1			Mfsd2a			H2-Ab1			H2-Ab1			H2-Ab1			H2-Ab1
5430420F09Rik			5430420F09Rik			5430420F09Rik			5430420F09Rik			5430420F09Rik			5430420F09Rik			5430420F09Rik			Serinc2			5430420F09Rik			5430420F09Rik			5430420F09Rik			5430420F09Rik
Prr14l			Prr14l			Prr14l			Prr14l			Prr14l			Prr14l			Prr14l			H2-Ab1			Prr14l			Prr14l			Prr14l			Prr14l
Itpka			Itpka			Itpka			Itpka			Itpka			Itpka			Itpka			5430420F09Rik			Itpka			Itpka			Itpka			Itpka
Pqlc3			Pqlc3			Pqlc3			Pqlc3			Pqlc3			Pqlc3			Pqlc3			Prr14l			Pqlc3			Pqlc3			Pqlc3			Pqlc3
Igsf6			Igsf6			Igsf6			Igsf6			Igsf6			Igsf6			Igsf6			Itpka			Igsf6			Igsf6			Igsf6			Igsf6
Eaf2			Eaf2			Eaf2			Eaf2			Eaf2			Eaf2			Eaf2			Pqlc3			Eaf2			Eaf2			Eaf2			Eaf2
Slit3			Slit3			Slit3			Slit3			Slit3			Slit3			Slit3			Igsf6			Slit3			Slit3			Slit3			Slit3
Camkk2			Camkk2			Camkk2			Camkk2			Camkk2			Camkk2			Camkk2			Eaf2			Camkk2			Camkk2			Camkk2			Camkk2
Gm3604			Gm3604			Gm3604			Gm3604			Gm3604			Gm3604			Gm3604			Slit3			Gm3604			Gm3604			Gm3604			Gm3604
Gm24401			Gm24401			Gm24401			Gm24401			Gm24401			Gm24401			Gm24401			Camkk2			Gm24401			Gm24401			Gm24401			Gm24401
Jarid2			Jarid2			Jarid2			Jarid2			Jarid2			Jarid2			Jarid2			Gm3604			Jarid2			Jarid2			Jarid2			Jarid2
Vash1			Vash1			Vash1			Vash1			Vash1			Vash1			Vash1			Gm24401			Vash1			Vash1			Vash1			Vash1
Rgs16			Rgs16			Rgs16			Rgs16			Rgs16			Rgs16			Rgs16			Jarid2			Rgs16			Rgs16			Rgs16			Rgs16
Hdgfl3			Hdgfl3			Hdgfl3			Hdgfl3			Hdgfl3			Hdgfl3			Hdgfl3			Vash1			Hdgfl3			Hdgfl3			Hdgfl3			Hdgfl3
Sla			Sla			Sla			Sla			Sla			Sla			Sla			Rgs16			Sla			Sla			Sla			Sla
Mdfi			Mdfi			Mdfi			Mdfi			Mdfi			Mdfi			Mdfi			Hdgfl3			Mdfi			Mdfi			Mdfi			Mdfi
H4c11			H4c11			H4c11			H4c11			H4c11			H4c11			H4c11			Sla			H4c11			H4c11			H4c11			H4c11
Erc1			Erc1			Erc1			Erc1			Erc1			Erc1			Erc1			Mdfi			Erc1			Erc1			Erc1			Erc1
Fa2h			Fa2h			Fa2h			Fa2h			Fa2h			Fa2h			Fa2h			H4c11			Fa2h			Fa2h			Fa2h			Fa2h
Kcna1			Kcna1			Kcna1			Kcna1			Kcna1			Kcna1			Kcna1			Erc1			Kcna1			Kcna1			Kcna1			Kcna1
Prdm6			Prdm6			Prdm6			Prdm6			Prdm6			Prdm6			Prdm6			Fa2h			Prdm6			Prdm6			Prdm6			Prdm6
Nlrp5-ps			Nlrp5-ps			Nlrp5-ps			Nlrp5-ps			Nlrp5-ps			Nlrp5-ps			Nlrp5-ps			Kcna1			Nlrp5-ps			Nlrp5-ps			Nlrp5-ps			Nlrp5-ps
Ppp2r2c			Ppp2r2c			Ppp2r2c			Ppp2r2c			Ppp2r2c			Ppp2r2c			Ppp2r2c			Prdm6			Ppp2r2c			Ppp2r2c			Ppp2r2c			Ppp2r2c
A330015K06Rik			A330015K06Rik			A330015K06Rik			A330015K06Rik			A330015K06Rik			A330015K06Rik			A330015K06Rik			Nlrp5-ps			A330015K06Rik			A330015K06Rik			A330015K06Rik			A330015K06Rik
Hbb-bt			Hbb-bt			Hbb-bt			Hbb-bt			Hbb-bt			Hbb-bt			Hbb-bt			Ppp2r2c			Hbb-bt			Hbb-bt			Hbb-bt			Hbb-bt
Pamr1			Pamr1			Pamr1			Pamr1			Pamr1			Pamr1			Pamr1			A330015K06Rik			Pamr1			Pamr1			Pamr1			Pamr1
Tmem229b			Tmem229b			Tmem229b			Tmem229b			Tmem229b			Tmem229b			Tmem229b			Hbb-bt			Tmem229b			Tmem229b			Tmem229b			Tmem229b
Ms4a6b			Ms4a6b			Ms4a6b			Ms4a6b			Ms4a6b			Ms4a6b			Ms4a6b			Pamr1			Ms4a6b			Ms4a6b			Ms4a6b			Ms4a6b
Mog			Mog			Mog			Mog			Mog			Mog			Mog			Tmem229b			Mog			Mog			Mog			Mog
Cc2d2a			Cc2d2a			Cc2d2a			Cc2d2a			Cc2d2a			Cc2d2a			Cc2d2a			Ms4a6b			Cc2d2a			Cc2d2a			Cc2d2a			Cc2d2a
ENSMUSG00000095041			ENSMUSG00000095041			ENSMUSG00000095041			ENSMUSG00000095041			ENSMUSG00000095041			ENSMUSG00000095041			ENSMUSG00000095041			Mog			ENSMUSG00000095041			ENSMUSG00000095041			ENSMUSG00000095041			ENSMUSG00000095041
Myo1g			Myo1g			Myo1g			Myo1g			Myo1g			Myo1g			Myo1g			Cc2d2a			Myo1g			Myo1g			Myo1g			Myo1g
Kcnk3			Kcnk3			Kcnk3			Kcnk3			Kcnk3			Kcnk3			Kcnk3			ENSMUSG00000095041			Kcnk3			Kcnk3			Kcnk3			Kcnk3
Cacng7			Cacng7			Cacng7			Cacng7			Cacng7			Cacng7			Cacng7			Myo1g			Cacng7			Cacng7			Cacng7			Cacng7
Adcy1			Adcy1			Adcy1			Adcy1			Adcy1			Adcy1			Adcy1			Kcnk3			Adcy1			Adcy1			Adcy1			Adcy1
Prr18			Prr18			Prr18			Prr18			Prr18			Prr18			Prr18			Cacng7			Prr18			Prr18			Prr18			Prr18
Rap2a			Rap2a			Rap2a			Rap2a			Rap2a			Rap2a			Rap2a			Adcy1			Rap2a			Rap2a			Rap2a			Rap2a
Kcnc3			Kcnc3			Kcnc3			Kcnc3			Kcnc3			Kcnc3			Kcnc3			Prr18			Kcnc3			Kcnc3			Kcnc3			Kcnc3
Adgrl1			Adgrl1			Adgrl1			Adgrl1			Adgrl1			Adgrl1			Adgrl1			Rap2a			Adgrl1			Adgrl1			Adgrl1			Adgrl1
Tfcp2l1			Tfcp2l1			Tfcp2l1			Tfcp2l1			Tfcp2l1			Tfcp2l1			Tfcp2l1			Kcnc3			Tfcp2l1			Tfcp2l1			Tfcp2l1			Tfcp2l1
Tcea3			Tcea3			Tcea3			Tcea3			Tcea3			Tcea3			Tcea3			Adgrl1			Tcea3			Tcea3			Tcea3			Tcea3
Nlgn2			Nlgn2			Nlgn2			Nlgn2			Nlgn2			Nlgn2			Nlgn2			Tfcp2l1			Nlgn2			Nlgn2			Nlgn2			Nlgn2
Ankrd34a			Ankrd34a			Ankrd34a			Ankrd34a			Ankrd34a			Ankrd34a			Ankrd34a			Tcea3			Ankrd34a			Ankrd34a			Ankrd34a			Ankrd34a
Gm42769			Gm42769			Gm42769			Gm42769			Gm42769			Gm42769			Gm42769			Nlgn2			Gm42769			Gm42769			Gm42769			Gm42769
Tmem132a			Tmem132a			Tmem132a			Tmem132a			Tmem132a			Tmem132a			Tmem132a			Ankrd34a			Tmem132a			Tmem132a			Tmem132a			Tmem132a
Npc2			Npc2			Npc2			Npc2			Npc2			Npc2			Npc2			Gm42769			Npc2			Npc2			Npc2			Npc2
Xlr			Xlr			Xlr			Xlr			Xlr			Xlr			Xlr			Tmem132a			Xlr			Xlr			Xlr			Xlr
Stk17b			Stk17b			Stk17b			Stk17b			Stk17b			Stk17b			Stk17b			Npc2			Stk17b			Stk17b			Stk17b			Stk17b
Il21r			Il21r			Il21r			Il21r			Il21r			Il21r			Il21r			Xlr			Il21r			Il21r			Il21r			Il21r
Rhoh			Rhoh			Rhoh			Rhoh			Rhoh			Rhoh			Rhoh			Stk17b			Rhoh			Rhoh			Rhoh			Rhoh
Gm43140			Gm43140			Gm43140			Gm43140			Gm43140			Gm43140			Gm43140			Il21r			Gm43140			Gm43140			Gm43140			Gm43140
Mgp			Mgp			Mgp			Mgp			Mgp			Mgp			Mgp			Rhoh			Mgp			Mgp			Mgp			Mgp
Atp1b2			Atp1b2			Atp1b2			Atp1b2			Atp1b2			Atp1b2			Atp1b2			Gm43140			Atp1b2			Atp1b2			Atp1b2			Atp1b2
Pdk1			Pdk1			Pdk1			Pdk1			Pdk1			Pdk1			Pdk1			Mgp			Pdk1			Pdk1			Pdk1			Pdk1
Prg4			Prg4			Prg4			Prg4			Prg4			Prg4			Prg4			Atp1b2			Prg4			Prg4			Prg4			Prg4
Chchd7			Chchd7			Chchd7			Chchd7			Chchd7			Chchd7			Chchd7			Pdk1			Chchd7			Chchd7			Chchd7			Chchd7
Smyd3			Smyd3			Smyd3			Smyd3			Smyd3			Smyd3			Smyd3			Prg4			Smyd3			Smyd3			Smyd3			Smyd3
Lrguk			Lrguk			Lrguk			Lrguk			Lrguk			Lrguk			Lrguk			Chchd7			Lrguk			Lrguk			Lrguk			Lrguk
Prr16			Prr16			Prr16			Prr16			Prr16			Prr16			Prr16			Smyd3			Prr16			Prr16			Prr16			Prr16
Ccdc88b			Ccdc88b			Ccdc88b			Ccdc88b			Ccdc88b			Ccdc88b			Ccdc88b			Lrguk			Ccdc88b			Ccdc88b			Ccdc88b			Ccdc88b
Gm15564			Gm15564			Gm15564			Gm15564			Gm15564			Gm15564			Gm15564			Prr16			Gm15564			Gm15564			Gm15564			Gm15564
Wasf3			Wasf3			Wasf3			Wasf3			Wasf3			Wasf3			Wasf3			Ccdc88b			Wasf3			Wasf3			Wasf3			Wasf3
Ybx2			Ybx2			Ybx2			Ybx2			Ybx2			Ybx2			Ybx2			Gm15564			Ybx2			Ybx2			Ybx2			Ybx2
Rac2			Rac2			Rac2			Rac2			Rac2			Rac2			Rac2			Wasf3			Rac2			Rac2			Rac2			Rac2
Adamts6			Adamts6			Adamts6			Adamts6			Adamts6			Adamts6			Adamts6			Ybx2			Adamts6			Adamts6			Adamts6			Adamts6
Trim5			Trim5			Trim5			Trim5			Trim5			Trim5			Trim5			Rac2			Trim5			Trim5			Trim5			Trim5
Gpr84			Gpr84			Gpr84			Gpr84			Gpr84			Gpr84			Gpr84			Adamts6			Gpr84			Gpr84			Gpr84			Gpr84
Galnt9			Galnt9			Galnt9			Galnt9			Galnt9			Galnt9			Galnt9			Trim5			Galnt9			Galnt9			Galnt9			Galnt9
Bex1			Bex1			Bex1			Bex1			Bex1			Bex1			Bex1			Gpr84			Bex1			Bex1			Bex1			Bex1
mt-Nd1			mt-Nd1			mt-Nd1			mt-Nd1			mt-Nd1			mt-Nd1			mt-Nd1			Galnt9			mt-Nd1			mt-Nd1			mt-Nd1			mt-Nd1
Cdcp3			Cdcp3			Cdcp3			Cdcp3			Cdcp3			Cdcp3			Cdcp3			Bex1			Cdcp3			Cdcp3			Cdcp3			Cdcp3
Thbs1			Thbs1			Thbs1			Thbs1			Thbs1			Thbs1			Thbs1			mt-Nd1			Thbs1			Thbs1			Thbs1			Thbs1
Atp2b4			Atp2b4			Atp2b4			Atp2b4			Atp2b4			Atp2b4			Atp2b4			Cdcp3			Atp2b4			Atp2b4			Atp2b4			Atp2b4
Gpr183			Gpr183			Gpr183			Gpr183			Gpr183			Gpr183			Gpr183			Thbs1			Gpr183			Gpr183			Gpr183			Gpr183
Rps24			Rps24			Rps24			Rps24			Rps24			Rps24			Rps24			Atp2b4			Rps24			Rps24			Rps24			Rps24
Doc2b			Doc2b			Doc2b			Doc2b			Doc2b			Doc2b			Doc2b			Gpr183			Doc2b			Doc2b			Doc2b			Doc2b
Lzts1			Lzts1			Lzts1			Lzts1			Lzts1			Lzts1			Lzts1			Rps24			Lzts1			Lzts1			Lzts1			Lzts1
C1s1			C1s1			C1s1			C1s1			C1s1			C1s1			C1s1			Doc2b			C1s1			C1s1			C1s1			C1s1
Timp3			Timp3			Timp3			Timp3			Timp3			Timp3			Timp3			Lzts1			Timp3			Timp3			Timp3			Timp3
Ang			Ang			Ang			Ang			Ang			Ang			Ang			C1s1			Ang			Ang			Ang			Ang
Zfp185			Zfp185			Zfp185			Zfp185			Zfp185			Zfp185			Zfp185			Timp3			Zfp185			Zfp185			Zfp185			Zfp185
Gm43230			Gm43230			Gm43230			Gm43230			Gm43230			Gm43230			Gm43230			Ang			Gm43230			Gm43230			Gm43230			Gm43230
mt-Tt			mt-Tt			mt-Tt			mt-Tt			mt-Tt			mt-Tt			mt-Tt			Zfp185			mt-Tt			mt-Tt			mt-Tt			mt-Tt
Maob			Maob			Maob			Maob			Maob			Maob			Maob			Gm43230			Maob			Maob			Maob			Maob
Cdkl1			Cdkl1			Cdkl1			Cdkl1			Cdkl1			Cdkl1			Cdkl1			mt-Tt			Cdkl1			Cdkl1			Cdkl1			Cdkl1
Slc26a7			Slc26a7			Slc26a7			Slc26a7			Slc26a7			Slc26a7			Slc26a7			Maob			Slc26a7			Slc26a7			Slc26a7			Slc26a7
Gm37735			Gm37735			Gm37735			Gm37735			Gm37735			Gm37735			Gm37735			Cdkl1			Gm37735			Gm37735			Gm37735			Gm37735
Erap1			Erap1			Erap1			Erap1			Erap1			Erap1			Erap1			Slc26a7			Erap1			Erap1			Erap1			Erap1
Kcnh1			Kcnh1			Kcnh1			Kcnh1			Kcnh1			Kcnh1			Kcnh1			Gm37735			Kcnh1			Kcnh1			Kcnh1			Kcnh1
Psg29			Psg29			Psg29			Psg29			Psg29			Psg29			Psg29			Erap1			Psg29			Psg29			Psg29			Psg29
Calb2			Calb2			Calb2			Calb2			Calb2			Calb2			Calb2			Kcnh1			Calb2			Calb2			Calb2			Calb2
Slc38a5			Slc38a5			Slc38a5			Slc38a5			Slc38a5			Slc38a5			Slc38a5			Psg29			Slc38a5			Slc38a5			Slc38a5			Slc38a5
Snora23			Snora23			Snora23			Snora23			Snora23			Snora23			Snora23			Calb2			Snora23			Snora23			Snora23			Snora23
Tnxb			Tnxb			Tnxb			Tnxb			Tnxb			Tnxb			Tnxb			Slc38a5			Tnxb			Tnxb			Tnxb			Tnxb
Stx1b			Stx1b			Stx1b			Stx1b			Stx1b			Stx1b			Stx1b			Snora23			Stx1b			Stx1b			Stx1b			Stx1b
Ush1g			Ush1g			Ush1g			Ush1g			Ush1g			Ush1g			Ush1g			Tnxb			Ush1g			Ush1g			Ush1g			Ush1g
Kcnj11			Kcnj11			Kcnj11			Kcnj11			Kcnj11			Kcnj11			Kcnj11			Stx1b			Kcnj11			Kcnj11			Kcnj11			Kcnj11
Cmya5			Cmya5			Cmya5			Cmya5			Cmya5			Cmya5			Cmya5			Ush1g			Cmya5			Cmya5			Cmya5			Cmya5
A930033H14Rik			A930033H14Rik			A930033H14Rik			A930033H14Rik			A930033H14Rik			A930033H14Rik			A930033H14Rik			Kcnj11			A930033H14Rik			A930033H14Rik			A930033H14Rik			A930033H14Rik
Gm48678			Gm48678			Gm48678			Gm48678			Gm48678			Gm48678			Gm48678			Cmya5			Gm48678			Gm48678			Gm48678			Gm48678
Kcnb1			Kcnb1			Kcnb1			Kcnb1			Kcnb1			Kcnb1			Kcnb1			A930033H14Rik			Kcnb1			Kcnb1			Kcnb1			Kcnb1
Fam131a			Fam131a			Fam131a			Fam131a			Fam131a			Fam131a			Fam131a			Gm48678			Fam131a			Fam131a			Fam131a			Fam131a
Lyl1			Lyl1			Lyl1			Lyl1			Lyl1			Lyl1			Lyl1			Kcnb1			Lyl1			Lyl1			Lyl1			Lyl1
Aldh1a2			Aldh1a2			Aldh1a2			Aldh1a2			Aldh1a2			Aldh1a2			Aldh1a2			Fam131a			Aldh1a2			Aldh1a2			Aldh1a2			Aldh1a2
Nfic			Nfic			Nfic			Nfic			Nfic			Nfic			Nfic			Lyl1			Nfic			Nfic			Nfic			Nfic
Creb3l1			Creb3l1			Creb3l1			Creb3l1			Creb3l1			Creb3l1			Creb3l1			Aldh1a2			Creb3l1			Creb3l1			Creb3l1			Creb3l1
Igsf9b			Igsf9b			Igsf9b			Igsf9b			Igsf9b			Igsf9b			Igsf9b			Nfic			Igsf9b			Igsf9b			Igsf9b			Igsf9b
Sv2c			Sv2c			Sv2c			Sv2c			Sv2c			Sv2c			Sv2c			Creb3l1			Sv2c			Sv2c			Sv2c			Sv2c
Ifi47			Ifi47			Ifi47			Ifi47			Ifi47			Ifi47			Ifi47			Igsf9b			Ifi47			Ifi47			Ifi47			Ifi47
mt-Cytb			mt-Cytb			mt-Cytb			mt-Cytb			mt-Cytb			mt-Cytb			mt-Cytb			Sv2c			mt-Cytb			mt-Cytb			mt-Cytb			mt-Cytb
Gm11681			Gm11681			Gm11681			Gm11681			Gm11681			Gm11681			Gm11681			Ifi47			Gm11681			Gm11681			Gm11681			Gm11681
Hpse			Hpse			Hpse			Hpse			Hpse			Hpse			Hpse			mt-Cytb			Hpse			Hpse			Hpse			Hpse
Cyp1b1			Cyp1b1			Cyp1b1			Cyp1b1			Cyp1b1			Cyp1b1			Cyp1b1			Gm11681			Cyp1b1			Cyp1b1			Cyp1b1			Cyp1b1
Nptxr			Nptxr			Nptxr			Nptxr			Nptxr			Nptxr			Nptxr			Hpse			Nptxr			Nptxr			Nptxr			Nptxr
Fam163b			Fam163b			Fam163b			Fam163b			Fam163b			Fam163b			Fam163b			Cyp1b1			Fam163b			Fam163b			Fam163b			Fam163b
Pygl			Pygl			Pygl			Pygl			Pygl			Pygl			Pygl			Nptxr			Pygl			Pygl			Pygl			Pygl
Nxph3			Nxph3			Nxph3			Nxph3			Nxph3			Nxph3			Nxph3			Fam163b			Nxph3			Nxph3			Nxph3			Nxph3
Cfh			Cfh			Cfh			Cfh			Cfh			Cfh			Cfh			Pygl			Cfh			Cfh			Cfh			Cfh
Gm39465			Gm39465			Gm39465			Gm39465			Gm39465			Gm39465			Gm39465			Nxph3			Gm39465			Gm39465			Gm39465			Gm39465
Rpl21			Rpl21			Rpl21			Rpl21			Rpl21			Rpl21			Rpl21			Cfh			Rpl21			Rpl21			Rpl21			Rpl21
Il20rb			Il20rb			Il20rb			Il20rb			Il20rb			Il20rb			Il20rb			Gm39465			Il20rb			Il20rb			Il20rb			Il20rb
A2ml1			A2ml1			A2ml1			A2ml1			A2ml1			A2ml1			A2ml1			Rpl21			A2ml1			A2ml1			A2ml1			A2ml1
Gna15			Gna15			Gna15			Gna15			Gna15			Gna15			Gna15			Il20rb			Gna15			Gna15			Gna15			Gna15
Vim			Vim			Vim			Vim			Vim			Vim			Vim			A2ml1			Vim			Vim			Vim			Vim
Gm25776			Gm25776			Gm25776			Gm25776			Gm25776			Gm25776			Gm25776			Gna15			Gm25776			Gm25776			Gm25776			Gm25776
Nod2			Nod2			Nod2			Nod2			Nod2			Nod2			Nod2			Vim			Nod2			Nod2			Nod2			Nod2
9930014A18Rik			9930014A18Rik			9930014A18Rik			9930014A18Rik			9930014A18Rik			9930014A18Rik			9930014A18Rik			Gm25776			9930014A18Rik			9930014A18Rik			9930014A18Rik			9930014A18Rik
Cntnap1			Cntnap1			Cntnap1			Cntnap1			Cntnap1			Cntnap1			Cntnap1			Nod2			Cntnap1			Cntnap1			Cntnap1			Cntnap1
Hba-a1			Hba-a1			Hba-a1			Hba-a1			Hba-a1			Hba-a1			Hba-a1			9930014A18Rik			Hba-a1			Hba-a1			Hba-a1			Hba-a1
Itm2a			Itm2a			Itm2a			Itm2a			Itm2a			Itm2a			Itm2a			Cntnap1			Itm2a			Itm2a			Itm2a			Itm2a
7SK			7SK			7SK			7SK			7SK			7SK			7SK			Hba-a1			7SK			7SK			7SK			7SK
Maz			Maz			Maz			Maz			Maz			Maz			Maz			Itm2a			Maz			Maz			Maz			Maz
5033421B08Rik			5033421B08Rik			5033421B08Rik			5033421B08Rik			5033421B08Rik			5033421B08Rik			5033421B08Rik			7SK			5033421B08Rik			5033421B08Rik			5033421B08Rik			5033421B08Rik
Tlr6			Tlr6			Tlr6			Tlr6			Tlr6			Tlr6			Tlr6			Maz			Tlr6			Tlr6			Tlr6			Tlr6
Hbb-bs			Hbb-bs			Hbb-bs			Hbb-bs			Hbb-bs			Hbb-bs			Hbb-bs			5033421B08Rik			Hbb-bs			Hbb-bs			Hbb-bs			Hbb-bs
Sulf1			Sulf1			Sulf1			Sulf1			Sulf1			Sulf1			Sulf1			Tlr6			Sulf1			Sulf1			Sulf1			Sulf1
Zfp92			Zfp92			Zfp92			Zfp92			Zfp92			Zfp92			Zfp92			Hbb-bs			Zfp92			Zfp92			Zfp92			Zfp92
Hexa			Hexa			Hexa			Hexa			Hexa			Hexa			Hexa			Sulf1			Hexa			Hexa			Hexa			Hexa
C130089K02Rik			C130089K02Rik			C130089K02Rik			C130089K02Rik			C130089K02Rik			C130089K02Rik			C130089K02Rik			Zfp92			C130089K02Rik			C130089K02Rik			C130089K02Rik			C130089K02Rik
Hs6st3			Hs6st3			Hs6st3			Hs6st3			Hs6st3			Hs6st3			Hs6st3			Hexa			Hs6st3			Hs6st3			Hs6st3			Hs6st3
Bub1b			Bub1b			Bub1b			Bub1b			Bub1b			Bub1b			Bub1b			C130089K02Rik			Bub1b			Bub1b			Bub1b			Bub1b
Crebrf			Crebrf			Crebrf			Crebrf			Crebrf			Crebrf			Crebrf			Hs6st3			Crebrf			Crebrf			Crebrf			Crebrf
Slc35f1			Slc35f1			Slc35f1			Slc35f1			Slc35f1			Slc35f1			Slc35f1			Bub1b			Slc35f1			Slc35f1			Slc35f1			Slc35f1
Gm20778			Gm20778			Gm20778			Gm20778			Gm20778			Gm20778			Gm20778			Crebrf			Gm20778			Gm20778			Gm20778			Gm20778
AA467197			AA467197			AA467197			AA467197			AA467197			AA467197			AA467197			Slc35f1			AA467197			AA467197			AA467197			AA467197
Trib2			Trib2			Trib2			Trib2			Trib2			Trib2			Trib2			Gm20778			Trib2			Trib2			Trib2			Trib2
Epb41l1			Epb41l1			Epb41l1			Epb41l1			Epb41l1			Epb41l1			Epb41l1			AA467197			Epb41l1			Epb41l1			Epb41l1			Epb41l1
Mmp15			Mmp15			Mmp15			Mmp15			Mmp15			Mmp15			Mmp15			Trib2			Mmp15			Mmp15			Mmp15			Mmp15
Dpysl4			Dpysl4			Dpysl4			Dpysl4			Dpysl4			Dpysl4			Dpysl4			Epb41l1			Dpysl4			Dpysl4			Dpysl4			Dpysl4
Nova2			Nova2			Nova2			Nova2			Nova2			Nova2			Nova2			Mmp15			Nova2			Nova2			Nova2			Nova2
Peg10			Peg10			Peg10			Peg10			Peg10			Peg10			Peg10			Dpysl4			Peg10			Peg10			Peg10			Peg10
Pcdhga9			Pcdhga9			Pcdhga9			Pcdhga9			Pcdhga9			Pcdhga9			Pcdhga9			Nova2			Pcdhga9			Pcdhga9			Pcdhga9			Pcdhga9
Fads2			Fads2			Fads2			Fads2			Fads2			Fads2			Fads2			Peg10			Fads2			Fads2			Fads2			Fads2
Col4a1			Col4a1			Col4a1			Col4a1			Col4a1			Col4a1			Col4a1			Pcdhga9			Col4a1			Col4a1			Col4a1			Col4a1
Itm2c			Itm2c			Itm2c			Itm2c			Itm2c			Itm2c			Itm2c			Fads2			Itm2c			Itm2c			Itm2c			Itm2c
Dsp			Dsp			Dsp			Dsp			Dsp			Dsp			Dsp			Col4a1			Dsp			Dsp			Dsp			Dsp
H2-Aa			H2-Aa			H2-Aa			H2-Aa			H2-Aa			H2-Aa			H2-Aa			Itm2c			H2-Aa			H2-Aa			H2-Aa			H2-Aa
Bpifb9a			Bpifb9a			Bpifb9a			Bpifb9a			Bpifb9a			Bpifb9a			Bpifb9a			Dsp			Bpifb9a			Bpifb9a			Bpifb9a			Bpifb9a
Bpifb9b			Bpifb9b			Bpifb9b			Bpifb9b			Bpifb9b			Bpifb9b			Bpifb9b			H2-Aa			Bpifb9b			Bpifb9b			Bpifb9b			Bpifb9b
Fabp7			Fabp7			Fabp7			Fabp7			Fabp7			Fabp7			Fabp7			Bpifb9a			Fabp7			Fabp7			Fabp7			Fabp7
Tpbg			Tpbg			Tpbg			Tpbg			Tpbg			Tpbg			Tpbg			Bpifb9b			Tpbg			Tpbg			Tpbg			Tpbg
Ccn3			Ccn3			Ccn3			Ccn3			Ccn3			Ccn3			Ccn3			Fabp7			Ccn3			Ccn3			Ccn3			Ccn3
Th			Th			Th			Th			Th			Th			Th			Tpbg			Th			Th			Th			Th
Snhg11			Snhg11			Snhg11			Snhg11			Snhg11			Snhg11			Snhg11			Ccn3			Snhg11			Snhg11			Snhg11			Snhg11
Ppm1e			Ppm1e			Ppm1e			Ppm1e			Ppm1e			Ppm1e			Ppm1e			Th			Ppm1e			Ppm1e			Ppm1e			Ppm1e
Slc7a11			Slc7a11			Slc7a11			Slc7a11			Slc7a11			Slc7a11			Slc7a11			Snhg11			Slc7a11			Slc7a11			Slc7a11			Slc7a11
Gm43305			Gm43305			Gm43305			Gm43305			Gm43305			Gm43305			Gm43305			Ppm1e			Gm43305			Gm43305			Gm43305			Gm43305
Scarna13			Scarna13			Scarna13			Scarna13			Scarna13			Scarna13			Scarna13			Slc7a11			Scarna13			Scarna13			Scarna13			Scarna13
Slc17a7			Slc17a7			Slc17a7			Slc17a7			Slc17a7			Slc17a7			Slc17a7			Gm43305			Slc17a7			Slc17a7			Slc17a7			Slc17a7
Rpl14			Rpl14			Rpl14			Rpl14			Rpl14			Rpl14			Rpl14			Scarna13			Rpl14			Rpl14			Rpl14			Rpl14
Gm3294			Gm3294			Gm3294			Gm3294			Gm3294			Gm3294			Gm3294			Slc17a7			Gm3294			Gm3294			Gm3294			Gm3294
Cacna1g			Cacna1g			Cacna1g			Cacna1g			Cacna1g			Cacna1g			Cacna1g			Rpl14			Cacna1g			Cacna1g			Cacna1g			Cacna1g
Ttbk1			Ttbk1			Ttbk1			Ttbk1			Ttbk1			Ttbk1			Ttbk1			Gm3294			Ttbk1			Ttbk1			Ttbk1			Ttbk1
Dagla			Dagla			Dagla			Dagla			Dagla			Dagla			Dagla			Cacna1g			Dagla			Dagla			Dagla			Dagla
Rpl32			Rpl32			Rpl32			Rpl32			Rpl32			Rpl32			Rpl32			Ttbk1			Rpl32			Rpl32			Rpl32			Rpl32
																					Dagla
																					Rpl32

## Sheet: SC YvM
Positive regulation of inflammatory response	15		Negative regulation of inflammatory response	8		Interferon-mediated signalling	0		Interleukin-mediated signalling	3		DAMs 2021	22		Microglial Exhaustion	9		Inflammasomes	2		cGAS-STING	2		Tfam-/-	3		LINE1 Derepression	4		TE Regulation	0		H3K9me3 proteome	0
Abcc1	Btk		Abr	Cst7		Adar			Akt1	Fcer1g		4632427E13Rik	Ccl3		Ager	Bcl6		Aim2	Naip2		Akt1	Ifi204		Abi3bp	Enpp2		Bst2	Ifi204		Actb			BCLAF1
Adam8	C3		Acod1	Elf4		Arg1			C1qtnf4	Stat6		9130401M01Rik	Ccl6		Anxa1	Cd38		Casp1	Naip5		Aurkb	Zdhhc9		Agrn	Lgals3bp		Cxcl10	Ifi30		Actl6a			CHTOP
Adora2b	Ccl3		Acp5	Fcgr2b		Cactin			Casp4	Ticam2		Acaca	Cd22		Bcl6	Clec7a		Casp4			Banf1			Apol9b	Trim30d		Ifi204	Irf5		Actl6b			Crebrf
Adora3	Ctss		Ada	Gpr17		Cdc37			Cd300lf			Ache	Cd52		Ccl2	Havcr2		Ddx3x			Cdk1			Bst2			Ifi27	Mal		Ago2			CBX1
Aim2	Fcer1g		Adcyap1	Igf1		Cnot7			Cd4			Adarb1	Cdca8		Ccr2	Kit		Dhx33			Cgas			Ccl2			Ifi30			Alkbh5			CBX3
Alox5ap	Fcgr1		Adipoq	Ldlr		Dcst1			Cebpa			Adck5	Clec7a		Ccr5	Lag3		Gsdmd			Ifi204			Cmpk2			Ifih1			Arid1a			CBX5
Aoc3	Fcgr3		Adora1	Ptpn6		Dnaja3			Csf2rb			Ank	Cst7		Cd244a	Pdcd1		Il18			Irf3			Cxcl10			Ifit1			Arid1b			CCDC137
App	H2-D1		Adora2a	Trem2		Eif4e2			Csf2rb2			Ankrd16	Ctsz		Cd274	S100a8		Il1b			Irf9			Dhx58			Ifit2			Arid2			CCDC59
Btk	H2-Q6		Ahr			Fadd			Ctr9			Apbb2	Cybb		Cd38	Ticam2		Naip1			Lyplal1			Dtx3l			Ifit3			Atf7ip			CCDC86
C2cd4a	Ldlr		Alox5			Gigyf2			Cxcr2			Aplp2	Dhcr7		Cd72			Naip2			Map3k7			Enpep			Ifitm1			Atrx			CEBPZ
C2cd4b	Lpl		Aoah			Hdac4			Cyld			Apoe	Enpp1		Cd74			Naip5			Nfkb1			Enpp2			Ifitm3			Bap1			CHAF1A
C3	Plcg2		Apoa1			Hpx			Egr1			Aprt	Enpp2		Cd86			Naip6			Parp1			Gbp2			Ifna1			Bcl7a			YBX3
Camk2n1	S100a8		Apoe			Ifih1			Fcer1g			Arap2	Gpnmb		Clec7a			Nlrc4			Ppp6c			Gbp3			Ifna2			Bcl7b			CUX1
Casp1	S100a9		Arnt			Ifitm1			Fer			Arrdc4	H2-D1		Csf1			Nlrp1a			Prkdc			Gbp7			Ifne			Bcl7c			DDX17
Casp4	Trem2		Ash1l			Ifitm2			Gab1			Asb10	Ifi204		Cxcl10			Nlrp1b			Sting1			H2-Q4			Irf5			Bicra			DDX5
Ccl1			Bcr			Ifitm3			Gfi1			Atf3	Igf1		Entpd1			Nlrp3			Tab1			Helz2			Isg15			Bicral			EBNA1BP2
Ccl3			C1qtnf3			Ifitm6			Ikbkb			Atp11c	Itgax		Havcr2			Nlrp6			Tbk1			Ifi35			Jak1			Brd4			ERH
Ccl5			C1qtnf12			Ifitm7			Ikbke			Atp6v0c	Lgals3bp		Icos			Pycard			Zbp1			Ifi44			Mal			Brd7			EXOSC10
Ccl24			Ccn3			Ifna1			Il11			Atp6v0c-ps2	Lpl		Il2rb						Zdhhc18			Ifih1			Mx1			Brd9			FUS
Ccn4			Cd24a			Ifnar1			Il11ra1			Axl	Lyz2		Il33						Zdhhc9			Ifit1			Mx2			Cbx1			FYTTD1
Ccr2			Cd44			Ifnar2			Il11ra2			Baiap2l2	Slamf9		Il7r									Ifit3			Oas2			Cbx3			GATAD2A
Ccr5			Cd200			Ifnb1						Bcl2a1b	Tyrobp		Kit									Ifit3b			Rigi			Cbx5			GATAD2B
Ccr7			Cd200l1			Ifng			Il12a			Birc5			Klf4									Igtp			Stat1			Cdk2ap1			Nop53
Cd24a			Cd200l2			Ifngr1			Il12b			Bola2			Lag3									Iigp1			Stat3			Cdk2ap2			HDLBP
Cd28			Cd200r1			Ifngr2			Il12rb1			Cadm1			Ly96									Irf7			Tnfsf10			Chaf1a			HMGA1
Cd47			Cd276			Igtp			Il12rb2			Capg			Myd88									Irf9						Chaf1b			HNRNPA2B1
Cd81			Cdh5			Ikbke			Il15			Ccdc88a			Nfkb1									Irgm1						Chd3			HNRNPK
Cebpa			Chrna7			Irak1			Il15ra			Ccl3			P2rx7									Irgm2						Chd4			HNRNPL
Cebpb			Cst7			Irf1			Il17a			Ccl4			Pdcd1									Isg15						Chd5			HP1BP3
Clock			Ctla2a			Irf3			Il17f			Ccl6			Prickle1									Lgals3bp						Ctcf			KHDRBS1
Cnr1			Cx3cr1			Irf7			Il17ra			Cd22			S100a8									Mx2						Daxx			KHDRBS3
Csf1r			Cxcl17			Irgm1			Il17rc			Cd34			Satb1									Oas1a						Ddx4			LLPH
Ctsc			Cyld			Irgm2			Il18			Cd52			Sirpa									Oasl2						Dgcr8			LOXL1
Ctss			Cyp19a1			Isg15			Il18r1			Cd63			Socs3									Parp10						Dhx9			LOXL2
Ddt			Dusp10			Jak1			Il18rap			Cd74			Spp1									Parp14						Dicer1			LTBP2
Dhx9			Elf4			Jak2			Il1a			Cd83			Stat1									Parp9						Dnmt1			MATR3
Ets1			Enpp3			Lsm14a			Il1b			Cd9			Tcf7									Psmb8						Dnmt3a			MBD3
Fabp4			Ets1			Mavs			Il1r1			Cdc42ep3			Ticam1									Rigi						Dnmt3b			MBNL1
Fcer1a			Extl3			Med1			Il1r2			Cdca8			Ticam2									Rnf213						Dnmt3c			MPHOSPH10
Fcer1g			Fcgr2b			Mettl3			Il1rap			Ch25h			Tirap									Rtp4						Dnmt3l			MRTO4
Fcgr1			Fem1a			Mmp12			Il1rl1			Chst1												Sim2						Dpf1			MYBBP1A
Fcgr3			Fem1al			Mul1			Il1rn			Clec7a												Slfn2						Dpf2			MYEF2
Fem1a			Ffar4			Myd88			Il2			Cops9												Stat1						Dpf3			NCOA5
Ffar2			Fndc4			Nlrc5			Il2ra			Cox6a2												Stat2						Drosha			NCOA7
Ffar3			Foxf1			Oas1a			Il2rb			Cox6c												Tgtp1						Ehmt1			NONO
Gpr4			Foxp3			Oas1b			Il2rg			Cpd												Trim30a						Ehmt2			PES1
Gprc5b			Fpr2			Oas1c			Il3			Crip1												Trim30d						Elp3			PHB
Gpsm3			Fpr3			Oas1d			Il33			Crlf2												Usp18						Fto			PIAS2
Grn			Fpr-rs3			Oas1e			Il34			Csf1												Xaf1						Gatad2a			POLDIP3
Gsdmd			Fpr-rs4			Oas1f			Il3ra			Csf2ra												Zbp1						Gatad2b			PPAN
H2-D1			Fpr-rs6			Oas1g			Il4			Cst7																		Gtsf1			PPHLN1
H2-K1			Fpr-rs7			Oas1h			Il4ra			Ctsb																		H3f3a			PRDM15
H2-M1			Fxr1			Oas2			Il5			Ctsz																		H3f3b			PRMT1
H2-M2			Gata3			Oas3			Il5ra			Cxcl16																		H3f3c			PRRX2
H2-M5			Ghrl			Otop1			Il6			Cybb																		Hdac1			PTBP1
H2-M9			Ghsr			Parp9			Il6ra			Dhcr7																		Hdac2			QKI
H2-M10.1			Git1			Parp14			Il6st			Dhx32																		Hinfp			RBM12B1
H2-M10.2			Gper1			Pparg			Il9r			Dnajc15																		Kmt5b			RBM15
H2-M10.3			Gpr17			Ptpn2			Irak1			Dpcd																		Kmt5c			RBM26
H2-M10.4			Gpr31b			Rbm47			Irak2			Dpp7																		Lig1			RBM6
H2-M10.5			Gps2			Rfpl4b			Irak3			Dusp3																		Mbd2			RBMX
H2-M10.6			Gpx1			Rnf185			Irak4			Echs1																		Mbd3			RBMXL1
H2-M11			Gpx2			Samhd1			Jak1			Egr2																		Mbd5			RELA
H2-Q1			Grn			Sin3a			Jak2			Ell2																		Mbd6			RIF1
H2-Q2			Gstp1			Smim30			Jak3			Enpp1																		Mettl14			RPF1
H2-Q4			Hamp			Stat1			Lyn			Enpp2																		Mettl16			RPF2
H2-Q6			Hgf			Stat2			Map3k7			Ero1b																		Mettl3			RPS19BP1
H2-Q7			Ier3			Sting1			Mapk3			Etl4																		Morc1			SAFB
H2-Q10			Igf1			Tbk1			Mir301			Fam20c																		Morc2a			SAFB2
H2-T3			Igtp			Trex1			Myd88			Fcgr4																		Morc2b			SETDB1
H2-T9			Il2			Trim6			Nfkbia			Fgl2																		Morc3			SFPQ
H2-T10			Il2ra			Trim41			Nlrp6			Frrs1																		Mov10l1			TRA2B
H2-T22			Il4			Trim56			Notch1			Fth1																		Mphosph8			SLTM
H2-T23			Il10			Trim65			Oas2			Ftl1																		Mta1			SUMO2
Hyal2			Il10ra			Trp53			Oasl1			Fxyd5																		Mta2			SUV39H1
Ido1			Il12b			Ttll12			Oasl2			Fxyd6																		Mta3			SUV39H2
Ifi35			Il13			Txk			Otud4			Gfus																		Mtr4			SUZ12
Ifng			Il17a			Tyk2			Parp14			Glipr1																		Nsun2			TAF15
Ighg1			Il20rb			Ube2k			Pdgfb			Gm15772																		Ogt			TARDBP
Ighg2b			Il22			Usp27x			Pik3r1			Gnas																		Pabpn1			TCF25
Il1b			Il22ra1			Usp29			Plcb1			Gng12																		Pbrm1			THRAP3
Il1rl1			Il22ra2			Wnt5a			Ptpn2			Got1																		Phf10			TRA2A
Il6			Il33			Ythdf2			Rela			Gpnmb																		Piwil1			TRIM28
Il16			Ins1			Ythdf3			Ripk1			Gpr65																		Piwil2			UBE2I
Il17ra			Ins2			Zbp1			Rps6ka4			Gusb																		Piwil4			UTP3
Il17rb			Irgm1						Rps6ka5			H2-D1																		Pld6			WDR46
Il18			Irgm2						Smad4			H2-K1																		Pphln1			XRN2
Il33			Isl1						Spi1			H2-Q7																		Pspc1			YBX1
Kars1			Krt1						Src			Hif1a																		Rbbp4			YLPM1
Kcnn4			Ldlr						Srsf1			Ifi204																		Rbbp7			YTHDC1
Lbp			Lgals9						St18			Ifi27l2a																		Rbm26			YY2
Ldlr			Lpcat3						Stat1			Ifi27l2b																		Rbm27			ZC3H13
Lgals1			Lrfn5						Stat3			Ifit1																		Rbm7			Zfp207
Lgals2			Macir						Stat4			Ifit2																		Safb			Zfp326
Lilra5			Mdk						Stat5a			Igf1																		Safb2			Zfp438
Lpl			Mefv						Stat6			Il1b																		Setdb1			Zfp512
Lrrk2			Metrnl						Syk			Ildr2																		Setdb2			Zfp598
Lta			Mfhas1						Ticam2			Itgax																		Sin3a			Zfp622
Mdk			Mir147						Tirap			Kcnj2																		Sinhcaf			Zfp638
Mefv			Mir7578						Tnip2			Lgals3bp																		Sirt1
Mmp8			Mkrn2						Tollip			Lgi2																		Sirt6
Napepld			Muc19						Traf2			Lmbrd2																		Sltm
Nfkbia			Mvk						Traf3ip2			Lpl																		Smarca2
Nfkbiz			Ndfip1						Traf5			Lyz2																		Smarca4
Ninj1			Nfkb1						Traf6			Lyzl4																		Smarcb1
Nkg7			Nlrc3						Trim32			Mamdc2																		Smarcc1
Nlrp1a			Nlrp3						Tut4			Mblac2																		Smarcc2
Nlrp1b			Nlrp6						Tyk2			Mif																		Smarcd1
Nlrp3			Nlrp12						Usp25			Mir682																		Smarcd2
Nlrp6			Nlrx1						Vrk2			Mrpl27																		Smarcd3
Nlrp10			Nod2						Yap1			Mt1																		Smarce1
Nmi			Npy						Zbp1			Myo1e																		Spen
Nppa			Npy5r									Naglu																		Spocd1
Npy5r			Nr1d1									Nat8l																		Ss18
Nupr1			Nr1d2									Ncbp2as2																		Ss18l1
Osm			Nr1h3									Nceh1																		Ss18l2
Park7			Nr1h4									Ndufv3																		Sumo2
Pdcd4			Nr1h5									Nlrc5																		Suv39h1
Pde2a			Nt5e									Npc2																		Suv39h2
Pde5a			Otulin									Pkib																		Tarbp2
Pik3cg			Pbk									Pld3																		Tasor
Pla2g3			Pdcd10									Pogk																		Tasor2
Plcg2			Pf4									Psat1																		Tet1
Prkca			Pglyrp1									Pycrl																		Tet2
Ptger3			Pla2g5									Ramp1																		Tex15
Ptger4			Pla2g10									Rap2b																		Tnrc18
Ptgs2			Ppara									Rpl23																		Trim28
Pycard			Ppard									Rps18																		Uhrf1
Ripk1			Pparg									Rras																		Uhrf2
Rps19			Proc									S1pr1																		Wiz
S100a8			Psma1									Scd2																		Wtap
S100a9			Psmb4									Scpep1																		Ytdc1
Serpine1			Ptger4									Sdc3																		Ytdc2
Setd4			Ptgis									Serpine2																		Ytdfh2
Snca			Ptpn2									Slamf9																		Ytdhf3
Snx4			Ptpn6									Slc1a2																		Ythdf1
Stap1			Rabgef1									Slc23a2																		Yy1
Stat5a			Rb1									Slc44a1																		Zc3h13
Stat5b			Reg3g									Speg																		Zc3h3
Sucnr1			Rora									Spp1																		Zcchc8
Tac1			Rps19									Srebf2																		Zfc3h1
Tafa3			Selenos									Ssh1
Tgfb1			Sharpin									Ssr4
Tlr2			Siglece									St14
Tlr4			Siglecg									St8sia6
Tlr6			Sirpa									Stim2
Tnf			Slamf8									Sulf2
Tnfrsf1a			Slc39a8									Syngr1
Tnfrsf11a			Smad3									Tbcd
Tnfsf4			Smpdl3b									Thbs1
Tnfsf11			Socs3									Tmem154
Tnfsf18			Socs5									Tpd52
Tnip1			Sod1									Trim32
Tradd			Spn									Tspo
Trem2			Stat3									Ttf1
Trpv4			Syt11									Ttr
Tslp			Tafa3									Tuba1c
Ttbk1			Tff2									Tyrobp
Vamp8			Tnfaip3									Upp2
Wnt5a			Tnfaip6									Zdhhc21
Zbp1			Tnfaip8l2									Zfas1
Zp3			Tnfrsf1a									Zfp692
			Tnfrsf1b
			Trem2
			Trim45
			Trim65
			Tyro3
			Uaca
			Vps35
			Wfdc1
			Zfp36
Abca8a			Abca8a			Abca8a			Abca8a			Abca8a			Abca8a			Abca8a						Abca8a			Abca8a			Abca8a			Abca8a
Slc9b2			Slc9b2			Slc9b2			Slc9b2			Slc9b2			Slc9b2			Slc9b2						Slc9b2			Slc9b2			Slc9b2			Slc9b2
9630013A20Rik			9630013A20Rik			9630013A20Rik			9630013A20Rik			9630013A20Rik			9630013A20Rik			9630013A20Rik			Abca8a			9630013A20Rik			9630013A20Rik			9630013A20Rik			9630013A20Rik
Mpeg1			Mpeg1			Mpeg1			Mpeg1			Mpeg1			Mpeg1			Mpeg1			Slc9b2			Mpeg1			Mpeg1			Mpeg1			Mpeg1
Opalin			Opalin			Opalin			Opalin			Opalin			Opalin			Opalin			9630013A20Rik			Opalin			Opalin			Opalin			Opalin
Mog			Mog			Mog			Mog			Mog			Mog			Mog			Mpeg1			Mog			Mog			Mog			Mog
Tspan2			Tspan2			Tspan2			Tspan2			Tspan2			Tspan2			Tspan2			Opalin			Tspan2			Tspan2			Tspan2			Tspan2
Pcdhb3			Pcdhb3			Pcdhb3			Pcdhb3			Pcdhb3			Pcdhb3			Pcdhb3			Mog			Pcdhb3			Pcdhb3			Pcdhb3			Pcdhb3
A530053G22Rik			A530053G22Rik			A530053G22Rik			A530053G22Rik			A530053G22Rik			A530053G22Rik			A530053G22Rik			Tspan2			A530053G22Rik			A530053G22Rik			A530053G22Rik			A530053G22Rik
Gm597			Gm597			Gm597			Gm597			Gm597			Gm597			Gm597			Pcdhb3			Gm597			Gm597			Gm597			Gm597
Pcdhb2			Pcdhb2			Pcdhb2			Pcdhb2			Pcdhb2			Pcdhb2			Pcdhb2			A530053G22Rik			Pcdhb2			Pcdhb2			Pcdhb2			Pcdhb2
Myoc			Myoc			Myoc			Myoc			Myoc			Myoc			Myoc			Gm597			Myoc			Myoc			Myoc			Myoc
Spag6			Spag6			Spag6			Spag6			Spag6			Spag6			Spag6			Pcdhb2			Spag6			Spag6			Spag6			Spag6
Pcdhb9			Pcdhb9			Pcdhb9			Pcdhb9			Pcdhb9			Pcdhb9			Pcdhb9			Myoc			Pcdhb9			Pcdhb9			Pcdhb9			Pcdhb9
Gm4221			Gm4221			Gm4221			Gm4221			Gm4221			Gm4221			Gm4221			Spag6			Gm4221			Gm4221			Gm4221			Gm4221
Pcdhb11			Pcdhb11			Pcdhb11			Pcdhb11			Pcdhb11			Pcdhb11			Pcdhb11			Pcdhb9			Pcdhb11			Pcdhb11			Pcdhb11			Pcdhb11
9330199G10Rik			9330199G10Rik			9330199G10Rik			9330199G10Rik			9330199G10Rik			9330199G10Rik			9330199G10Rik			Gm4221			9330199G10Rik			9330199G10Rik			9330199G10Rik			9330199G10Rik
Fmo2			Fmo2			Fmo2			Fmo2			Fmo2			Fmo2			Fmo2			Pcdhb11			Fmo2			Fmo2			Fmo2			Fmo2
Gamt			Gamt			Gamt			Gamt			Gamt			Gamt			Gamt			9330199G10Rik			Gamt			Gamt			Gamt			Gamt
Cd22			Cd22			Cd22			Cd22			Cd22			Cd22			Cd22			Fmo2			Cd22			Cd22			Cd22			Cd22
Prkag3			Prkag3			Prkag3			Prkag3			Prkag3			Prkag3			Prkag3			Gamt			Prkag3			Prkag3			Prkag3			Prkag3
Ly9			Ly9			Ly9			Ly9			Ly9			Ly9			Ly9			Cd22			Ly9			Ly9			Ly9			Ly9
Pcdhb5			Pcdhb5			Pcdhb5			Pcdhb5			Pcdhb5			Pcdhb5			Pcdhb5			Prkag3			Pcdhb5			Pcdhb5			Pcdhb5			Pcdhb5
Hmgcs1			Hmgcs1			Hmgcs1			Hmgcs1			Hmgcs1			Hmgcs1			Hmgcs1			Ly9			Hmgcs1			Hmgcs1			Hmgcs1			Hmgcs1
Tent5c			Tent5c			Tent5c			Tent5c			Tent5c			Tent5c			Tent5c			Pcdhb5			Tent5c			Tent5c			Tent5c			Tent5c
Itgax			Itgax			Itgax			Itgax			Itgax			Itgax			Itgax			Hmgcs1			Itgax			Itgax			Itgax			Itgax
C4b			C4b			C4b			C4b			C4b			C4b			C4b			Tent5c			C4b			C4b			C4b			C4b
Nid1			Nid1			Nid1			Nid1			Nid1			Nid1			Nid1			Itgax			Nid1			Nid1			Nid1			Nid1
Mpz			Mpz			Mpz			Mpz			Mpz			Mpz			Mpz			C4b			Mpz			Mpz			Mpz			Mpz
C1qa			C1qa			C1qa			C1qa			C1qa			C1qa			C1qa			Nid1			C1qa			C1qa			C1qa			C1qa
Lgals3			Lgals3			Lgals3			Lgals3			Lgals3			Lgals3			Lgals3			Mpz			Lgals3			Lgals3			Lgals3			Lgals3
Dmp1			Dmp1			Dmp1			Dmp1			Dmp1			Dmp1			Dmp1			C1qa			Dmp1			Dmp1			Dmp1			Dmp1
Etnppl			Etnppl			Etnppl			Etnppl			Etnppl			Etnppl			Etnppl			Lgals3			Etnppl			Etnppl			Etnppl			Etnppl
Col3a1			Col3a1			Col3a1			Col3a1			Col3a1			Col3a1			Col3a1			Dmp1			Col3a1			Col3a1			Col3a1			Col3a1
Myo1f			Myo1f			Myo1f			Myo1f			Myo1f			Myo1f			Myo1f			Etnppl			Myo1f			Myo1f			Myo1f			Myo1f
Pcdhga2			Pcdhga2			Pcdhga2			Pcdhga2			Pcdhga2			Pcdhga2			Pcdhga2			Col3a1			Pcdhga2			Pcdhga2			Pcdhga2			Pcdhga2
Fa2h			Fa2h			Fa2h			Fa2h			Fa2h			Fa2h			Fa2h			Myo1f			Fa2h			Fa2h			Fa2h			Fa2h
Plp1			Plp1			Plp1			Plp1			Plp1			Plp1			Plp1			Pcdhga2			Plp1			Plp1			Plp1			Plp1
Ctss			Ctss			Ctss			Ctss			Ctss			Ctss			Ctss			Fa2h			Ctss			Ctss			Ctss			Ctss
Clec7a			Clec7a			Clec7a			Clec7a			Clec7a			Clec7a			Clec7a			Plp1			Clec7a			Clec7a			Clec7a			Clec7a
Gm2115			Gm2115			Gm2115			Gm2115			Gm2115			Gm2115			Gm2115			Ctss			Gm2115			Gm2115			Gm2115			Gm2115
Pcdhga7			Pcdhga7			Pcdhga7			Pcdhga7			Pcdhga7			Pcdhga7			Pcdhga7			Clec7a			Pcdhga7			Pcdhga7			Pcdhga7			Pcdhga7
Ptpn6			Ptpn6			Ptpn6			Ptpn6			Ptpn6			Ptpn6			Ptpn6			Gm2115			Ptpn6			Ptpn6			Ptpn6			Ptpn6
Cldn11			Cldn11			Cldn11			Cldn11			Cldn11			Cldn11			Cldn11			Pcdhga7			Cldn11			Cldn11			Cldn11			Cldn11
Pcdhb4			Pcdhb4			Pcdhb4			Pcdhb4			Pcdhb4			Pcdhb4			Pcdhb4			Ptpn6			Pcdhb4			Pcdhb4			Pcdhb4			Pcdhb4
Naalad2			Naalad2			Naalad2			Naalad2			Naalad2			Naalad2			Naalad2			Cldn11			Naalad2			Naalad2			Naalad2			Naalad2
Gipr			Gipr			Gipr			Gipr			Gipr			Gipr			Gipr			Pcdhb4			Gipr			Gipr			Gipr			Gipr
3222401L13Rik			3222401L13Rik			3222401L13Rik			3222401L13Rik			3222401L13Rik			3222401L13Rik			3222401L13Rik			Naalad2			3222401L13Rik			3222401L13Rik			3222401L13Rik			3222401L13Rik
Gnb4			Gnb4			Gnb4			Gnb4			Gnb4			Gnb4			Gnb4			Gipr			Gnb4			Gnb4			Gnb4			Gnb4
Nrep			Nrep			Nrep			Nrep			Nrep			Nrep			Nrep			3222401L13Rik			Nrep			Nrep			Nrep			Nrep
Cacna2d4			Cacna2d4			Cacna2d4			Cacna2d4			Cacna2d4			Cacna2d4			Cacna2d4			Gnb4			Cacna2d4			Cacna2d4			Cacna2d4			Cacna2d4
C1qb			C1qb			C1qb			C1qb			C1qb			C1qb			C1qb			Nrep			C1qb			C1qb			C1qb			C1qb
Igf1			Igf1			Igf1			Igf1			Igf1			Igf1			Igf1			Cacna2d4			Igf1			Igf1			Igf1			Igf1
Lyz2			Lyz2			Lyz2			Lyz2			Lyz2			Lyz2			Lyz2			C1qb			Lyz2			Lyz2			Lyz2			Lyz2
Csf3r			Csf3r			Csf3r			Csf3r			Csf3r			Csf3r			Csf3r			Igf1			Csf3r			Csf3r			Csf3r			Csf3r
Kdelr3			Kdelr3			Kdelr3			Kdelr3			Kdelr3			Kdelr3			Kdelr3			Lyz2			Kdelr3			Kdelr3			Kdelr3			Kdelr3
Ikzf1			Ikzf1			Ikzf1			Ikzf1			Ikzf1			Ikzf1			Ikzf1			Csf3r			Ikzf1			Ikzf1			Ikzf1			Ikzf1
Hvcn1			Hvcn1			Hvcn1			Hvcn1			Hvcn1			Hvcn1			Hvcn1			Kdelr3			Hvcn1			Hvcn1			Hvcn1			Hvcn1
Gm48678			Gm48678			Gm48678			Gm48678			Gm48678			Gm48678			Gm48678			Ikzf1			Gm48678			Gm48678			Gm48678			Gm48678
Itgb2			Itgb2			Itgb2			Itgb2			Itgb2			Itgb2			Itgb2			Hvcn1			Itgb2			Itgb2			Itgb2			Itgb2
Mal			Mal			Mal			Mal			Mal			Mal			Mal			Gm48678			Mal			Mal			Mal			Mal
Fbxw23			Fbxw23			Fbxw23			Fbxw23			Fbxw23			Fbxw23			Fbxw23			Itgb2			Fbxw23			Fbxw23			Fbxw23			Fbxw23
Gpr17			Gpr17			Gpr17			Gpr17			Gpr17			Gpr17			Gpr17			Mal			Gpr17			Gpr17			Gpr17			Gpr17
Marcksl1			Marcksl1			Marcksl1			Marcksl1			Marcksl1			Marcksl1			Marcksl1			Fbxw23			Marcksl1			Marcksl1			Marcksl1			Marcksl1
Ptprc			Ptprc			Ptprc			Ptprc			Ptprc			Ptprc			Ptprc			Gpr17			Ptprc			Ptprc			Ptprc			Ptprc
Mfap4			Mfap4			Mfap4			Mfap4			Mfap4			Mfap4			Mfap4			Marcksl1			Mfap4			Mfap4			Mfap4			Mfap4
Rab7b			Rab7b			Rab7b			Rab7b			Rab7b			Rab7b			Rab7b			Ptprc			Rab7b			Rab7b			Rab7b			Rab7b
Fabp7			Fabp7			Fabp7			Fabp7			Fabp7			Fabp7			Fabp7			Mfap4			Fabp7			Fabp7			Fabp7			Fabp7
Gm7696			Gm7696			Gm7696			Gm7696			Gm7696			Gm7696			Gm7696			Rab7b			Gm7696			Gm7696			Gm7696			Gm7696
Kif19a			Kif19a			Kif19a			Kif19a			Kif19a			Kif19a			Kif19a			Fabp7			Kif19a			Kif19a			Kif19a			Kif19a
C1qc			C1qc			C1qc			C1qc			C1qc			C1qc			C1qc			Gm7696			C1qc			C1qc			C1qc			C1qc
ENSMUSG00000117733			ENSMUSG00000117733			ENSMUSG00000117733			ENSMUSG00000117733			ENSMUSG00000117733			ENSMUSG00000117733			ENSMUSG00000117733			Kif19a			ENSMUSG00000117733			ENSMUSG00000117733			ENSMUSG00000117733			ENSMUSG00000117733
Cyp2e1			Cyp2e1			Cyp2e1			Cyp2e1			Cyp2e1			Cyp2e1			Cyp2e1			C1qc			Cyp2e1			Cyp2e1			Cyp2e1			Cyp2e1
Slc37a2			Slc37a2			Slc37a2			Slc37a2			Slc37a2			Slc37a2			Slc37a2			ENSMUSG00000117733			Slc37a2			Slc37a2			Slc37a2			Slc37a2
Cst7			Cst7			Cst7			Cst7			Cst7			Cst7			Cst7			Cyp2e1			Cst7			Cst7			Cst7			Cst7
Aass			Aass			Aass			Aass			Aass			Aass			Aass			Slc37a2			Aass			Aass			Aass			Aass
Lcat			Lcat			Lcat			Lcat			Lcat			Lcat			Lcat			Cst7			Lcat			Lcat			Lcat			Lcat
Depdc1b			Depdc1b			Depdc1b			Depdc1b			Depdc1b			Depdc1b			Depdc1b			Aass			Depdc1b			Depdc1b			Depdc1b			Depdc1b
4930452G13Rik			4930452G13Rik			4930452G13Rik			4930452G13Rik			4930452G13Rik			4930452G13Rik			4930452G13Rik			Lcat			4930452G13Rik			4930452G13Rik			4930452G13Rik			4930452G13Rik
Eya4			Eya4			Eya4			Eya4			Eya4			Eya4			Eya4			Depdc1b			Eya4			Eya4			Eya4			Eya4
Nckap1l			Nckap1l			Nckap1l			Nckap1l			Nckap1l			Nckap1l			Nckap1l			4930452G13Rik			Nckap1l			Nckap1l			Nckap1l			Nckap1l
Mc5r			Mc5r			Mc5r			Mc5r			Mc5r			Mc5r			Mc5r			Eya4			Mc5r			Mc5r			Mc5r			Mc5r
AU020206			AU020206			AU020206			AU020206			AU020206			AU020206			AU020206			Nckap1l			AU020206			AU020206			AU020206			AU020206
Ncan			Ncan			Ncan			Ncan			Ncan			Ncan			Ncan			Mc5r			Ncan			Ncan			Ncan			Ncan
Ugt8a			Ugt8a			Ugt8a			Ugt8a			Ugt8a			Ugt8a			Ugt8a			AU020206			Ugt8a			Ugt8a			Ugt8a			Ugt8a
Enpp6			Enpp6			Enpp6			Enpp6			Enpp6			Enpp6			Enpp6			Ncan			Enpp6			Enpp6			Enpp6			Enpp6
Gal3st1			Gal3st1			Gal3st1			Gal3st1			Gal3st1			Gal3st1			Gal3st1			Ugt8a			Gal3st1			Gal3st1			Gal3st1			Gal3st1
A930006I01Rik			A930006I01Rik			A930006I01Rik			A930006I01Rik			A930006I01Rik			A930006I01Rik			A930006I01Rik			Enpp6			A930006I01Rik			A930006I01Rik			A930006I01Rik			A930006I01Rik
Tmem254			Tmem254			Tmem254			Tmem254			Tmem254			Tmem254			Tmem254			Gal3st1			Tmem254			Tmem254			Tmem254			Tmem254
Plek			Plek			Plek			Plek			Plek			Plek			Plek			A930006I01Rik			Plek			Plek			Plek			Plek
Msmo1			Msmo1			Msmo1			Msmo1			Msmo1			Msmo1			Msmo1			Tmem254			Msmo1			Msmo1			Msmo1			Msmo1
Gm10635			Gm10635			Gm10635			Gm10635			Gm10635			Gm10635			Gm10635			Plek			Gm10635			Gm10635			Gm10635			Gm10635
A330076C08Rik			A330076C08Rik			A330076C08Rik			A330076C08Rik			A330076C08Rik			A330076C08Rik			A330076C08Rik			Msmo1			A330076C08Rik			A330076C08Rik			A330076C08Rik			A330076C08Rik
Rnf122			Rnf122			Rnf122			Rnf122			Rnf122			Rnf122			Rnf122			Gm10635			Rnf122			Rnf122			Rnf122			Rnf122
Mlph			Mlph			Mlph			Mlph			Mlph			Mlph			Mlph			A330076C08Rik			Mlph			Mlph			Mlph			Mlph
Idi1			Idi1			Idi1			Idi1			Idi1			Idi1			Idi1			Rnf122			Idi1			Idi1			Idi1			Idi1
Abca6			Abca6			Abca6			Abca6			Abca6			Abca6			Abca6			Mlph			Abca6			Abca6			Abca6			Abca6
Cemip			Cemip			Cemip			Cemip			Cemip			Cemip			Cemip			Idi1			Cemip			Cemip			Cemip			Cemip
Ncf1			Ncf1			Ncf1			Ncf1			Ncf1			Ncf1			Ncf1			Abca6			Ncf1			Ncf1			Ncf1			Ncf1
Lmo7			Lmo7			Lmo7			Lmo7			Lmo7			Lmo7			Lmo7			Cemip			Lmo7			Lmo7			Lmo7			Lmo7
Chst3			Chst3			Chst3			Chst3			Chst3			Chst3			Chst3			Ncf1			Chst3			Chst3			Chst3			Chst3
Hmgcs2			Hmgcs2			Hmgcs2			Hmgcs2			Hmgcs2			Hmgcs2			Hmgcs2			Lmo7			Hmgcs2			Hmgcs2			Hmgcs2			Hmgcs2
Pcdhga6			Pcdhga6			Pcdhga6			Pcdhga6			Pcdhga6			Pcdhga6			Pcdhga6			Chst3			Pcdhga6			Pcdhga6			Pcdhga6			Pcdhga6
Trem2			Trem2			Trem2			Trem2			Trem2			Trem2			Trem2			Hmgcs2			Trem2			Trem2			Trem2			Trem2
A330015K06Rik			A330015K06Rik			A330015K06Rik			A330015K06Rik			A330015K06Rik			A330015K06Rik			A330015K06Rik			Pcdhga6			A330015K06Rik			A330015K06Rik			A330015K06Rik			A330015K06Rik
Cd52			Cd52			Cd52			Cd52			Cd52			Cd52			Cd52			Trem2			Cd52			Cd52			Cd52			Cd52
Olfr111			Olfr111			Olfr111			Olfr111			Olfr111			Olfr111			Olfr111			A330015K06Rik			Olfr111			Olfr111			Olfr111			Olfr111
Gpnmb			Gpnmb			Gpnmb			Gpnmb			Gpnmb			Gpnmb			Gpnmb			Cd52			Gpnmb			Gpnmb			Gpnmb			Gpnmb
Ptpro			Ptpro			Ptpro			Ptpro			Ptpro			Ptpro			Ptpro			Olfr111			Ptpro			Ptpro			Ptpro			Ptpro
Treml2			Treml2			Treml2			Treml2			Treml2			Treml2			Treml2			Gpnmb			Treml2			Treml2			Treml2			Treml2
Pdcd1			Pdcd1			Pdcd1			Pdcd1			Pdcd1			Pdcd1			Pdcd1			Ptpro			Pdcd1			Pdcd1			Pdcd1			Pdcd1
Tnc			Tnc			Tnc			Tnc			Tnc			Tnc			Tnc			Treml2			Tnc			Tnc			Tnc			Tnc
Slc11a1			Slc11a1			Slc11a1			Slc11a1			Slc11a1			Slc11a1			Slc11a1			Pdcd1			Slc11a1			Slc11a1			Slc11a1			Slc11a1
Slc38a5			Slc38a5			Slc38a5			Slc38a5			Slc38a5			Slc38a5			Slc38a5			Tnc			Slc38a5			Slc38a5			Slc38a5			Slc38a5
Pcdhga1			Pcdhga1			Pcdhga1			Pcdhga1			Pcdhga1			Pcdhga1			Pcdhga1			Slc11a1			Pcdhga1			Pcdhga1			Pcdhga1			Pcdhga1
Rras2			Rras2			Rras2			Rras2			Rras2			Rras2			Rras2			Slc38a5			Rras2			Rras2			Rras2			Rras2
Igkc			Igkc			Igkc			Igkc			Igkc			Igkc			Igkc			Pcdhga1			Igkc			Igkc			Igkc			Igkc
Gm37111			Gm37111			Gm37111			Gm37111			Gm37111			Gm37111			Gm37111			Rras2			Gm37111			Gm37111			Gm37111			Gm37111
2900052N01Rik			2900052N01Rik			2900052N01Rik			2900052N01Rik			2900052N01Rik			2900052N01Rik			2900052N01Rik			Igkc			2900052N01Rik			2900052N01Rik			2900052N01Rik			2900052N01Rik
Pcdh12			Pcdh12			Pcdh12			Pcdh12			Pcdh12			Pcdh12			Pcdh12			Gm37111			Pcdh12			Pcdh12			Pcdh12			Pcdh12
Mfap5			Mfap5			Mfap5			Mfap5			Mfap5			Mfap5			Mfap5			2900052N01Rik			Mfap5			Mfap5			Mfap5			Mfap5
Bche			Bche			Bche			Bche			Bche			Bche			Bche			Pcdh12			Bche			Bche			Bche			Bche
Abca1			Abca1			Abca1			Abca1			Abca1			Abca1			Abca1			Mfap5			Abca1			Abca1			Abca1			Abca1
Erich5			Erich5			Erich5			Erich5			Erich5			Erich5			Erich5			Bche			Erich5			Erich5			Erich5			Erich5
Dock2			Dock2			Dock2			Dock2			Dock2			Dock2			Dock2			Abca1			Dock2			Dock2			Dock2			Dock2
Hcar2			Hcar2			Hcar2			Hcar2			Hcar2			Hcar2			Hcar2			Erich5			Hcar2			Hcar2			Hcar2			Hcar2
Tnfaip2			Tnfaip2			Tnfaip2			Tnfaip2			Tnfaip2			Tnfaip2			Tnfaip2			Dock2			Tnfaip2			Tnfaip2			Tnfaip2			Tnfaip2
Lpo			Lpo			Lpo			Lpo			Lpo			Lpo			Lpo			Hcar2			Lpo			Lpo			Lpo			Lpo
Barx2			Barx2			Barx2			Barx2			Barx2			Barx2			Barx2			Tnfaip2			Barx2			Barx2			Barx2			Barx2
Lag3			Lag3			Lag3			Lag3			Lag3			Lag3			Lag3			Lpo			Lag3			Lag3			Lag3			Lag3
Nlrp5-ps			Nlrp5-ps			Nlrp5-ps			Nlrp5-ps			Nlrp5-ps			Nlrp5-ps			Nlrp5-ps			Barx2			Nlrp5-ps			Nlrp5-ps			Nlrp5-ps			Nlrp5-ps
Ppl			Ppl			Ppl			Ppl			Ppl			Ppl			Ppl			Lag3			Ppl			Ppl			Ppl			Ppl
Masp1			Masp1			Masp1			Masp1			Masp1			Masp1			Masp1			Nlrp5-ps			Masp1			Masp1			Masp1			Masp1
Cd37			Cd37			Cd37			Cd37			Cd37			Cd37			Cd37			Ppl			Cd37			Cd37			Cd37			Cd37
Cd109			Cd109			Cd109			Cd109			Cd109			Cd109			Cd109			Masp1			Cd109			Cd109			Cd109			Cd109
C3ar1			C3ar1			C3ar1			C3ar1			C3ar1			C3ar1			C3ar1			Cd37			C3ar1			C3ar1			C3ar1			C3ar1
Gm21188			Gm21188			Gm21188			Gm21188			Gm21188			Gm21188			Gm21188			Cd109			Gm21188			Gm21188			Gm21188			Gm21188
Smyd1			Smyd1			Smyd1			Smyd1			Smyd1			Smyd1			Smyd1			C3ar1			Smyd1			Smyd1			Smyd1			Smyd1
Srd5a1			Srd5a1			Srd5a1			Srd5a1			Srd5a1			Srd5a1			Srd5a1			Gm21188			Srd5a1			Srd5a1			Srd5a1			Srd5a1
Dcdc2a			Dcdc2a			Dcdc2a			Dcdc2a			Dcdc2a			Dcdc2a			Dcdc2a			Smyd1			Dcdc2a			Dcdc2a			Dcdc2a			Dcdc2a
Fdft1			Fdft1			Fdft1			Fdft1			Fdft1			Fdft1			Fdft1			Srd5a1			Fdft1			Fdft1			Fdft1			Fdft1
Tmc3			Tmc3			Tmc3			Tmc3			Tmc3			Tmc3			Tmc3			Dcdc2a			Tmc3			Tmc3			Tmc3			Tmc3
Glis3			Glis3			Glis3			Glis3			Glis3			Glis3			Glis3			Fdft1			Glis3			Glis3			Glis3			Glis3
Cmtm5			Cmtm5			Cmtm5			Cmtm5			Cmtm5			Cmtm5			Cmtm5			Tmc3			Cmtm5			Cmtm5			Cmtm5			Cmtm5
Sqle			Sqle			Sqle			Sqle			Sqle			Sqle			Sqle			Glis3			Sqle			Sqle			Sqle			Sqle
Arhgap30			Arhgap30			Arhgap30			Arhgap30			Arhgap30			Arhgap30			Arhgap30			Cmtm5			Arhgap30			Arhgap30			Arhgap30			Arhgap30
Itih3			Itih3			Itih3			Itih3			Itih3			Itih3			Itih3			Sqle			Itih3			Itih3			Itih3			Itih3
Hmgcr			Hmgcr			Hmgcr			Hmgcr			Hmgcr			Hmgcr			Hmgcr			Arhgap30			Hmgcr			Hmgcr			Hmgcr			Hmgcr
Aplnr			Aplnr			Aplnr			Aplnr			Aplnr			Aplnr			Aplnr			Itih3			Aplnr			Aplnr			Aplnr			Aplnr
Plcb2			Plcb2			Plcb2			Plcb2			Plcb2			Plcb2			Plcb2			Hmgcr			Plcb2			Plcb2			Plcb2			Plcb2
Pi15			Pi15			Pi15			Pi15			Pi15			Pi15			Pi15			Aplnr			Pi15			Pi15			Pi15			Pi15
[truncated: 361 more rows]

## Sheet: SC YvO
Positive regulation of inflammatory response	65		Negative regulation of inflammatory response	49		Interferon-mediated signalling	29		Interleukin-mediated signalling	46		DAMs 2021	68		Microglial Exhaustion	28		Inflammasomes	12		cGAS-STING	8		Tfam-/-	34		LINE1 Derepression	17		TE Regulation	4		H3K9me3 proteome	5
[truncated: 2,791 more rows]

[truncated: 3 more sheets: SC MvM-IF, SC OvO-IF, Overlap YvO OvO-IF]
