# Supplementary material for: Intermittent fasting attenuates CNS inflammaging - rebalancing the transposonome
Source: Research Square preprint supplement (doi:10.21203/rs.3.rs-6165725/v1), 2025-03-12
Supplement: Supplementary file 3 [file 98d478845434f1da3de8f2a1.xlsx]

## Sheet: KZfp Locations
Zfp	Chr	GRCm39 Location		CTXM				CTO				HIPM				HIPO				CBM				CBO				SCM				SCO				MIF				OIF
Pogk	1	166,221,179 - 166,237,402 (-)		Zfp937	2	150,059,997 - 150,088,658 (+)		Zfp937	2	150,059,997 - 150,088,658 (+)		Zfp937	2	150,059,997 - 150,088,658 (+)		Zfp937	2	150,059,997 - 150,088,658 (+)		Zfp937	2	150,059,997 - 150,088,658 (+)		Zfp937	2	150,059,997 - 150,088,658 (+)		Zfp937	2	150,059,997 - 150,088,658 (+)		Zfp937	2	150,059,997 - 150,088,658 (+)		Zfp937	2	150,059,997 - 150,088,658 (+)		Zfp937	2	150,059,997 - 150,088,658 (+)
Zfp451	1	33,800,626 - 33,853,676 (-)		Zfp442	2	150,244,400 - 150,293,421 (-)		Zfp442	2	150,244,400 - 150,293,421 (-)		Zfp442	2	150,244,400 - 150,293,421 (-)		Zfp442	2	150,244,400 - 150,293,421 (-)		Zfp442	2	150,244,400 - 150,293,421 (-)		Zfp442	2	150,244,400 - 150,293,421 (-)		Zfp442	2	150,244,400 - 150,293,421 (-)		Zfp442	2	150,244,400 - 150,293,421 (-)		Zfp442	2	150,244,400 - 150,293,421 (-)		Zfp442	2	150,244,400 - 150,293,421 (-)
Zfp142	1	74,605,490 - 74,627,308 (-)		Zfp982	4	147,576,874 - 147,597,943 (+)		Zfp982	4	147,576,874 - 147,597,943 (+)		Zfp982	4	147,576,874 - 147,597,943 (+)		Zfp982	4	147,576,874 - 147,597,943 (+)		Zfp982	4	147,576,874 - 147,597,943 (+)		Zfp982	4	147,576,874 - 147,597,943 (+)		Zfp982	4	147,576,874 - 147,597,943 (+)		Zfp982	4	147,576,874 - 147,597,943 (+)		Zfp982	4	147,576,874 - 147,597,943 (+)		Zfp982	4	147,576,874 - 147,597,943 (+)
Zfp133ps	2	144,301,200 - 144,309,714 (+)		Zfp979	4	147,696,394 - 147,726,970 (-)		Zfp979	4	147,696,394 - 147,726,970 (-)		Zfp979	4	147,696,394 - 147,726,970 (-)		Zfp979	4	147,696,394 - 147,726,970 (-)		Zfp979	4	147,696,394 - 147,726,970 (-)		Zfp979	4	147,696,394 - 147,726,970 (-)		Zfp979	4	147,696,394 - 147,726,970 (-)		Zfp979	4	147,696,394 - 147,726,970 (-)		Zfp979	4	147,696,394 - 147,726,970 (-)		Zfp979	4	147,696,394 - 147,726,970 (-)
Zfp120	2	149,956,327-149,978,598 (-)		Zfp1007	5	109,822,409 - 109,838,700 (-)		Zfp1007	5	109,822,409 - 109,838,700 (-)		Zfp1007	5	109,822,409 - 109,838,700 (-)		Zfp1007	5	109,822,409 - 109,838,700 (-)		Zfp1007	5	109,822,409 - 109,838,700 (-)		Zfp1007	5	109,822,409 - 109,838,700 (-)		Zfp1007	5	109,822,409 - 109,838,700 (-)		Zfp1007	5	109,822,409 - 109,838,700 (-)		Zfp1007	5	109,822,409 - 109,838,700 (-)		Zfp1007	5	109,822,409 - 109,838,700 (-)
Zfp937	2	150,059,997 - 150,088,658 (+)		4930522L14Rik	5	109,883,856 - 109,899,752 (-)		4930522L14Rik	5	109,883,856 - 109,899,752 (-)		4930522L14Rik	5	109,883,856 - 109,899,752 (-)		4930522L14Rik	5	109,883,856 - 109,899,752 (-)		4930522L14Rik	5	109,883,856 - 109,899,752 (-)		4930522L14Rik	5	109,883,856 - 109,899,752 (-)		4930522L14Rik	5	109,883,856 - 109,899,752 (-)		4930522L14Rik	5	109,883,856 - 109,899,752 (-)		4930522L14Rik	5	109,883,856 - 109,899,752 (-)		4930522L14Rik	5	109,883,856 - 109,899,752 (-)
Zfp442	2	150,244,400 - 150,293,421 (-)		Zfp110	7	12,568,688 - 12,584,504 (+)		Zfp110	7	12,568,688 - 12,584,504 (+)		Zfp110	7	12,568,688 - 12,584,504 (+)		Zfp110	7	12,568,688 - 12,584,504 (+)		Zfp110	7	12,568,688 - 12,584,504 (+)		Zfp110	7	12,568,688 - 12,584,504 (+)		Zfp110	7	12,568,688 - 12,584,504 (+)		Zfp110	7	12,568,688 - 12,584,504 (+)		Zfp110	7	12,568,688 - 12,584,504 (+)		Zfp110	7	12,568,688 - 12,584,504 (+)
Zfp335	2	164,733,802-164,753,677 (-)		Zfp128	7	12,615,105 - 12,627,349 (+)		Zfp128	7	12,615,105 - 12,627,349 (+)		Zfp128	7	12,615,105 - 12,627,349 (+)		Zfp128	7	12,615,105 - 12,627,349 (+)		Zfp128	7	12,615,105 - 12,627,349 (+)		Zfp128	7	12,615,105 - 12,627,349 (+)		Zfp128	7	12,615,105 - 12,627,349 (+)		Zfp128	7	12,615,105 - 12,627,349 (+)		Zfp128	7	12,615,105 - 12,627,349 (+)		Zfp128	7	12,615,105 - 12,627,349 (+)
Zfp217	2	169,950,563 - 169,993,598 (-)		Zfp324	7	12,699,765 - 12,707,749 (+)		Zfp324	7	12,699,765 - 12,707,749 (+)		Zfp324	7	12,699,765 - 12,707,749 (+)		Zfp324	7	12,699,765 - 12,707,749 (+)		Zfp324	7	12,699,765 - 12,707,749 (+)		Zfp324	7	12,699,765 - 12,707,749 (+)		Zfp324	7	12,699,765 - 12,707,749 (+)		Zfp324	7	12,699,765 - 12,707,749 (+)		Zfp324	7	12,699,765 - 12,707,749 (+)		Zfp324	7	12,699,765 - 12,707,749 (+)
Zfp831	2	174,440,453 - 174,552,625 (+)		Zfp553	7	126,832,233 - 126,837,351 (+)		Zfp553	7	126,832,233 - 126,837,351 (+)		Zfp553	7	126,832,233 - 126,837,351 (+)		Zfp553	7	126,832,233 - 126,837,351 (+)		Zfp553	7	126,832,233 - 126,837,351 (+)		Zfp553	7	126,832,233 - 126,837,351 (+)		Zfp553	7	126,832,233 - 126,837,351 (+)		Zfp553	7	126,832,233 - 126,837,351 (+)		Zfp553	7	126,832,233 - 126,837,351 (+)		Zfp553	7	126,832,233 - 126,837,351 (+)
Gm14434	2	176,165,071 - 176,178,576 (-)		Zfp771	7	126,842,168 - 126,854,044 (+)		Zfp771	7	126,842,168 - 126,854,044 (+)		Zfp771	7	126,842,168 - 126,854,044 (+)		Zfp771	7	126,842,168 - 126,854,044 (+)		Zfp771	7	126,842,168 - 126,854,044 (+)		Zfp771	7	126,842,168 - 126,854,044 (+)		Zfp771	7	126,842,168 - 126,854,044 (+)		Zfp771	7	126,842,168 - 126,854,044 (+)		Zfp771	7	126,842,168 - 126,854,044 (+)		Zfp771	7	126,842,168 - 126,854,044 (+)
Gm14305	2	176,400,146 - 176,413,606 (+)		Zfp235	7	23,833,594 - 23,842,666 (+)		Zfp235	7	23,833,594 - 23,842,666 (+)		Zfp235	7	23,833,594 - 23,842,666 (+)		Zfp235	7	23,833,594 - 23,842,666 (+)		Zfp235	7	23,833,594 - 23,842,666 (+)		Zfp235	7	23,833,594 - 23,842,666 (+)		Zfp235	7	23,833,594 - 23,842,666 (+)		Zfp235	7	23,833,594 - 23,842,666 (+)		Zfp235	7	23,833,594 - 23,842,666 (+)		Zfp235	7	23,833,594 - 23,842,666 (+)
Gm14419	2	176,692,716 - 176,704,884 (+)		Zfp428	7	24,203,973 - 24,215,107 (+)		Zfp428	7	24,203,973 - 24,215,107 (+)		Zfp428	7	24,203,973 - 24,215,107 (+)		Zfp428	7	24,203,973 - 24,215,107 (+)		Zfp428	7	24,203,973 - 24,215,107 (+)		Zfp428	7	24,203,973 - 24,215,107 (+)		Zfp428	7	24,203,973 - 24,215,107 (+)		Zfp428	7	24,203,973 - 24,215,107 (+)		Zfp428	7	24,203,973 - 24,215,107 (+)		Zfp428	7	24,203,973 - 24,215,107 (+)
Zfp970	2	177,156,096 - 177,170,987 (+)		Zfp575	7	24,283,942 - 24,287,049 (-)		Zfp575	7	24,283,942 - 24,287,049 (-)		Zfp575	7	24,283,942 - 24,287,049 (-)		Zfp575	7	24,283,942 - 24,287,049 (-)		Zfp575	7	24,283,942 - 24,287,049 (-)		Zfp575	7	24,283,942 - 24,287,049 (-)		Zfp575	7	24,283,942 - 24,287,049 (-)		Zfp575	7	24,283,942 - 24,287,049 (-)		Zfp575	7	24,283,942 - 24,287,049 (-)		Zfp575	7	24,283,942 - 24,287,049 (-)
Zfp704	3	9,492,070 - 9,675,145 (-)		Zfp30	7	29,483,423 - 29,494,127 (+)		Zfp30	7	29,483,423 - 29,494,127 (+)		Zfp30	7	29,483,423 - 29,494,127 (+)		Zfp30	7	29,483,423 - 29,494,127 (+)		Zfp30	7	29,483,423 - 29,494,127 (+)		Zfp30	7	29,483,423 - 29,494,127 (+)		Zfp30	7	29,483,423 - 29,494,127 (+)		Zfp30	7	29,483,423 - 29,494,127 (+)		Zfp30	7	29,483,423 - 29,494,127 (+)		Zfp30	7	29,483,423 - 29,494,127 (+)
Zfp697	3	98,289,278 - 98,508,893 (+)		Zfp940	7	29,533,943 - 29,553,101 (-)		Zfp940	7	29,533,943 - 29,553,101 (-)		Zfp940	7	29,533,943 - 29,553,101 (-)		Zfp940	7	29,533,943 - 29,553,101 (-)		Zfp940	7	29,533,943 - 29,553,101 (-)		Zfp940	7	29,533,943 - 29,553,101 (-)		Zfp940	7	29,533,943 - 29,553,101 (-)		Zfp940	7	29,533,943 - 29,553,101 (-)		Zfp940	7	29,533,943 - 29,553,101 (-)		Zfp940	7	29,533,943 - 29,553,101 (-)
Zfp683	4	133,778,506 - 133,786,252 (+)		Zfp579	7	4,995,851 - 4,999,100 (-)		Zfp579	7	4,995,851 - 4,999,100 (-)		Zfp579	7	4,995,851 - 4,999,100 (-)		Zfp579	7	4,995,851 - 4,999,100 (-)		Zfp579	7	4,995,851 - 4,999,100 (-)		Zfp579	7	4,995,851 - 4,999,100 (-)		Zfp579	7	4,995,851 - 4,999,100 (-)		Zfp579	7	4,995,851 - 4,999,100 (-)		Zfp579	7	4,995,851 - 4,999,100 (-)		Zfp579	7	4,995,851 - 4,999,100 (-)
Zfp268	4	145,311,770 - 145,351,915 (+)		AW146154	7	41,128,298 - 41,149,314 (-)		AW146154	7	41,128,298 - 41,149,314 (-)		AW146154	7	41,128,298 - 41,149,314 (-)		AW146154	7	41,128,298 - 41,149,314 (-)		AW146154	7	41,128,298 - 41,149,314 (-)		AW146154	7	41,128,298 - 41,149,314 (-)		AW146154	7	41,128,298 - 41,149,314 (-)		AW146154	7	41,128,298 - 41,149,314 (-)		AW146154	7	41,128,298 - 41,149,314 (-)		AW146154	7	41,128,298 - 41,149,314 (-)
Zfp982	4	147,576,874 - 147,597,943 (+)		2610021A01Rik	7	41,248,654 - 41,277,957 (+)		2610021A01Rik	7	41,248,654 - 41,277,957 (+)		2610021A01Rik	7	41,248,654 - 41,277,957 (+)		2610021A01Rik	7	41,248,654 - 41,277,957 (+)		2610021A01Rik	7	41,248,654 - 41,277,957 (+)		2610021A01Rik	7	41,248,654 - 41,277,957 (+)		2610021A01Rik	7	41,248,654 - 41,277,957 (+)		2610021A01Rik	7	41,248,654 - 41,277,957 (+)		2610021A01Rik	7	41,248,654 - 41,277,957 (+)		2610021A01Rik	7	41,248,654 - 41,277,957 (+)
Zfp979	4	147,696,394 - 147,726,970 (-)		Zfp580	7	5,041,682 - 5,056,722 (+)		Zfp580	7	5,041,682 - 5,056,722 (+)		Zfp580	7	5,041,682 - 5,056,722 (+)		Zfp580	7	5,041,682 - 5,056,722 (+)		Zfp580	7	5,041,682 - 5,056,722 (+)		Zfp580	7	5,041,682 - 5,056,722 (+)		Zfp580	7	5,041,682 - 5,056,722 (+)		Zfp580	7	5,041,682 - 5,056,722 (+)		Zfp580	7	5,041,682 - 5,056,722 (+)		Zfp580	7	5,041,682 - 5,056,722 (+)
Zfp462	4	54,942,038 - 55,083,563 (+)		Zfp667	7	6,289,187 - 6,310,882 (+)		Zfp667	7	6,289,187 - 6,310,882 (+)		Zfp667	7	6,289,187 - 6,310,882 (+)		Zfp667	7	6,289,187 - 6,310,882 (+)		Zfp667	7	6,289,187 - 6,310,882 (+)		Zfp667	7	6,289,187 - 6,310,882 (+)		Zfp667	7	6,289,187 - 6,310,882 (+)		Zfp667	7	6,289,187 - 6,310,882 (+)		Zfp667	7	6,289,187 - 6,310,882 (+)		Zfp667	7	6,289,187 - 6,310,882 (+)
Zkscan16	4	58,943,628 - 58,958,355 (+)		Zfp28	7	6,386,317 - 6,399,636 (+)		Zfp28	7	6,386,317 - 6,399,636 (+)		Zfp28	7	6,386,317 - 6,399,636 (+)		Zfp28	7	6,386,317 - 6,399,636 (+)		Zfp28	7	6,386,317 - 6,399,636 (+)		Zfp28	7	6,386,317 - 6,399,636 (+)		Zfp28	7	6,386,317 - 6,399,636 (+)		Zfp28	7	6,386,317 - 6,399,636 (+)		Zfp28	7	6,386,317 - 6,399,636 (+)		Zfp28	7	6,386,317 - 6,399,636 (+)
Zfp37	4	62,107,777 - 62,126,685 (-)		Zim1	7	6,677,443 - 6,699,521 (-)		Zim1	7	6,677,443 - 6,699,521 (-)		Zim1	7	6,677,443 - 6,699,521 (-)		Zim1	7	6,677,443 - 6,699,521 (-)		Zim1	7	6,677,443 - 6,699,521 (-)		Zim1	7	6,677,443 - 6,699,521 (-)		Zim1	7	6,677,443 - 6,699,521 (-)		Zim1	7	6,677,443 - 6,699,521 (-)		Zim1	7	6,677,443 - 6,699,521 (-)		Zim1	7	6,677,443 - 6,699,521 (-)
Zfp951	5	104,950,112 - 105,007,988 (-)		Zfp773	7	7,133,677 - 7,139,754 (-)		Zfp773	7	7,133,677 - 7,139,754 (-)		Zfp773	7	7,133,677 - 7,139,754 (-)		Zfp773	7	7,133,677 - 7,139,754 (-)		Zfp773	7	7,133,677 - 7,139,754 (-)		Zfp773	7	7,133,677 - 7,139,754 (-)		Zfp773	7	7,133,677 - 7,139,754 (-)		Zfp773	7	7,133,677 - 7,139,754 (-)		Zfp773	7	7,133,677 - 7,139,754 (-)		Zfp773	7	7,133,677 - 7,139,754 (-)
Zfp1007	5	109,822,409 - 109,838,700 (-)		Zfp964	8	70,107,113 - 70,119,782 (+)		Zfp964	8	70,107,113 - 70,119,782 (+)		Zfp964	8	70,107,113 - 70,119,782 (+)		Zfp964	8	70,107,113 - 70,119,782 (+)		Zfp964	8	70,107,113 - 70,119,782 (+)		Zfp964	8	70,107,113 - 70,119,782 (+)		Zfp964	8	70,107,113 - 70,119,782 (+)		Zfp964	8	70,107,113 - 70,119,782 (+)		Zfp964	8	70,107,113 - 70,119,782 (+)		Zfp964	8	70,107,113 - 70,119,782 (+)
4930522L14Rik	5	109,883,856 - 109,899,752 (-)		Zfp869	8	70,157,787 - 70,169,718 (-)		Zfp869	8	70,157,787 - 70,169,718 (-)		Zfp869	8	70,157,787 - 70,169,718 (-)		Zfp869	8	70,157,787 - 70,169,718 (-)		Zfp869	8	70,157,787 - 70,169,718 (-)		Zfp869	8	70,157,787 - 70,169,718 (-)		Zfp869	8	70,157,787 - 70,169,718 (-)		Zfp869	8	70,157,787 - 70,169,718 (-)		Zfp869	8	70,157,787 - 70,169,718 (-)		Zfp869	8	70,157,787 - 70,169,718 (-)
Zfp11	5	129,731,659 - 129,747,152 (-)		Zfp660	9	122,732,313 - 122,743,223 (+)		Zfp660	9	122,732,313 - 122,743,223 (+)		Zfp660	9	122,732,313 - 122,743,223 (+)		Zfp660	9	122,732,313 - 122,743,223 (+)		Zfp660	9	122,732,313 - 122,743,223 (+)		Zfp660	9	122,732,313 - 122,743,223 (+)		Zfp660	9	122,732,313 - 122,743,223 (+)		Zfp660	9	122,732,313 - 122,743,223 (+)		Zfp660	9	122,732,313 - 122,743,223 (+)		Zfp660	9	122,732,313 - 122,743,223 (+)
Zfp113	5	138,137,964 - 138,154,006 (-)		Zfp105	9	122,752,137 - 122,760,093 (+)		Zfp105	9	122,752,137 - 122,760,093 (+)		Zfp105	9	122,752,137 - 122,760,093 (+)		Zfp105	9	122,752,137 - 122,760,093 (+)		Zfp105	9	122,752,137 - 122,760,093 (+)		Zfp105	9	122,752,137 - 122,760,093 (+)		Zfp105	9	122,752,137 - 122,760,093 (+)		Zfp105	9	122,752,137 - 122,760,093 (+)		Zfp105	9	122,752,137 - 122,760,093 (+)		Zfp105	9	122,752,137 - 122,760,093 (+)
Zfp12	5	143,220,910 - 143,233,712 (+)		Zfp26	9	20,338,457 - 20,371,465 (-)		Zfp26	9	20,338,457 - 20,371,465 (-)		Zfp26	9	20,338,457 - 20,371,465 (-)		Zfp26	9	20,338,457 - 20,371,465 (-)		Zfp26	9	20,338,457 - 20,371,465 (-)		Zfp26	9	20,338,457 - 20,371,465 (-)		Zfp26	9	20,338,457 - 20,371,465 (-)		Zfp26	9	20,338,457 - 20,371,465 (-)		Zfp26	9	20,338,457 - 20,371,465 (-)		Zfp26	9	20,338,457 - 20,371,465 (-)
Zfp518b	5	38,825,828 - 38,842,120 (-)		Zfp266	9	20,406,364 - 20,432,715 (-)		Zfp266	9	20,406,364 - 20,432,715 (-)		Zfp266	9	20,406,364 - 20,432,715 (-)		Zfp266	9	20,406,364 - 20,432,715 (-)		Zfp266	9	20,406,364 - 20,432,715 (-)		Zfp266	9	20,406,364 - 20,432,715 (-)		Zfp266	9	20,406,364 - 20,432,715 (-)		Zfp266	9	20,406,364 - 20,432,715 (-)		Zfp266	9	20,406,364 - 20,432,715 (-)		Zfp266	9	20,406,364 - 20,432,715 (-)
Zfp804b	5	6,819,030 - 7,394,378 (-)		Zfp846	9	20,492,595 - 20,516,706 (+)		Zfp846	9	20,492,595 - 20,516,706 (+)		Zfp846	9	20,492,595 - 20,516,706 (+)		Zfp846	9	20,492,595 - 20,516,706 (+)		Zfp846	9	20,492,595 - 20,516,706 (+)		Zfp846	9	20,492,595 - 20,516,706 (+)		Zfp846	9	20,492,595 - 20,516,706 (+)		Zfp846	9	20,492,595 - 20,516,706 (+)		Zfp846	9	20,492,595 - 20,516,706 (+)		Zfp846	9	20,492,595 - 20,516,706 (+)
Gm5581	6	131,143,329 - 131,144,284 (-)		Zkscan3	13	21,571,173 - 21,586,925 (-)		Zkscan3	13	21,571,173 - 21,586,925 (-)		Zkscan3	13	21,571,173 - 21,586,925 (-)		Zkscan3	13	21,571,173 - 21,586,925 (-)		Zkscan3	13	21,571,173 - 21,586,925 (-)		Zkscan3	13	21,571,173 - 21,586,925 (-)		Zkscan3	13	21,571,173 - 21,586,925 (-)		Zkscan3	13	21,571,173 - 21,586,925 (-)		Zkscan3	13	21,571,173 - 21,586,925 (-)		Zkscan3	13	21,571,173 - 21,586,925 (-)
Zfp398	6	47,812,595 - 47,850,471 (+)		Zfp192	13	21,697,391 - 21,715,284 (-)		Zfp192	13	21,697,391 - 21,715,284 (-)		Zfp192	13	21,697,391 - 21,715,284 (-)		Zfp192	13	21,697,391 - 21,715,284 (-)		Zfp192	13	21,697,391 - 21,715,284 (-)		Zfp192	13	21,697,391 - 21,715,284 (-)		Zfp192	13	21,697,391 - 21,715,284 (-)		Zfp192	13	21,697,391 - 21,715,284 (-)		Zfp192	13	21,697,391 - 21,715,284 (-)		Zfp192	13	21,697,391 - 21,715,284 (-)
Zik1	7	10,221,151 - 10,229,308 (-)		Zfp808	13	62,277,674 - 62,321,752 (+)		Zfp808	13	62,277,674 - 62,321,752 (+)		Zfp808	13	62,277,674 - 62,321,752 (+)		Zfp808	13	62,277,674 - 62,321,752 (+)		Zfp808	13	62,277,674 - 62,321,752 (+)		Zfp808	13	62,277,674 - 62,321,752 (+)		Zfp808	13	62,277,674 - 62,321,752 (+)		Zfp808	13	62,277,674 - 62,321,752 (+)		Zfp808	13	62,277,674 - 62,321,752 (+)		Zfp808	13	62,277,674 - 62,321,752 (+)
Zfp110	7	12,568,688 - 12,584,504 (+)		Gm3604	13	62,516,142 - 62,530,991 (-)		Gm3604	13	62,516,142 - 62,530,991 (-)		Gm3604	13	62,516,142 - 62,530,991 (-)		Gm3604	13	62,516,142 - 62,530,991 (-)		Gm3604	13	62,516,142 - 62,530,991 (-)		Gm3604	13	62,516,142 - 62,530,991 (-)		Gm3604	13	62,516,142 - 62,530,991 (-)		Gm3604	13	62,516,142 - 62,530,991 (-)		Gm3604	13	62,516,142 - 62,530,991 (-)		Gm3604	13	62,516,142 - 62,530,991 (-)
Zfp128	7	12,615,105 - 12,627,349 (+)		Zfp934	13	62,664,609 - 62,727,170 (-)		Zfp934	13	62,664,609 - 62,727,170 (-)		Zfp934	13	62,664,609 - 62,727,170 (-)		Zfp934	13	62,664,609 - 62,727,170 (-)		Zfp934	13	62,664,609 - 62,727,170 (-)		Zfp934	13	62,664,609 - 62,727,170 (-)		Zfp934	13	62,664,609 - 62,727,170 (-)		Zfp934	13	62,664,609 - 62,727,170 (-)		Zfp934	13	62,664,609 - 62,727,170 (-)		Zfp934	13	62,664,609 - 62,727,170 (-)
Zfp324	7	12,699,765 - 12,707,749 (+)		Zfp1008	13	62,750,827 - 62,771,996 (-)		Zfp1008	13	62,750,827 - 62,771,996 (-)		Zfp1008	13	62,750,827 - 62,771,996 (-)		Zfp1008	13	62,750,827 - 62,771,996 (-)		Zfp1008	13	62,750,827 - 62,771,996 (-)		Zfp1008	13	62,750,827 - 62,771,996 (-)		Zfp1008	13	62,750,827 - 62,771,996 (-)		Zfp1008	13	62,750,827 - 62,771,996 (-)		Zfp1008	13	62,750,827 - 62,771,996 (-)		Zfp1008	13	62,750,827 - 62,771,996 (-)
Zfp553	7	126,832,233 - 126,837,351 (+)		Zfp712	13	67,186,658 - 67,209,234 (-)		Zfp712	13	67,186,658 - 67,209,234 (-)		Zfp712	13	67,186,658 - 67,209,234 (-)		Zfp712	13	67,186,658 - 67,209,234 (-)		Zfp712	13	67,186,658 - 67,209,234 (-)		Zfp712	13	67,186,658 - 67,209,234 (-)		Zfp712	13	67,186,658 - 67,209,234 (-)		Zfp712	13	67,186,658 - 67,209,234 (-)		Zfp712	13	67,186,658 - 67,209,234 (-)		Zfp712	13	67,186,658 - 67,209,234 (-)
Zfp771	7	126,842,168 - 126,854,044 (+)		Zfp759	13	67,273,040 - 67,290,468 (+)		Zfp759	13	67,273,040 - 67,290,468 (+)		Zfp759	13	67,273,040 - 67,290,468 (+)		Zfp759	13	67,273,040 - 67,290,468 (+)		Zfp759	13	67,273,040 - 67,290,468 (+)		Zfp759	13	67,273,040 - 67,290,468 (+)		Zfp759	13	67,273,040 - 67,290,468 (+)		Zfp759	13	67,273,040 - 67,290,468 (+)		Zfp759	13	67,273,040 - 67,290,468 (+)		Zfp759	13	67,273,040 - 67,290,468 (+)
Zfp646	7	127,476,081 - 127,485,168 (+)		Zfp458	13	67,402,982 - 67,426,530 (-)		Zfp458	13	67,402,982 - 67,426,530 (-)		Zfp458	13	67,402,982 - 67,426,530 (-)		Zfp458	13	67,402,982 - 67,426,530 (-)		Zfp458	13	67,402,982 - 67,426,530 (-)		Zfp458	13	67,402,982 - 67,426,530 (-)		Zfp458	13	67,402,982 - 67,426,530 (-)		Zfp458	13	67,402,982 - 67,426,530 (-)		Zfp458	13	67,402,982 - 67,426,530 (-)		Zfp458	13	67,402,982 - 67,426,530 (-)
Zfp941	7	140,387,362 - 140,402,091 (-)		Zfp953	13	67,487,373 - 67,508,691 (-)		Zfp953	13	67,487,373 - 67,508,691 (-)		Zfp953	13	67,487,373 - 67,508,691 (-)		Zfp953	13	67,487,373 - 67,508,691 (-)		Zfp953	13	67,487,373 - 67,508,691 (-)		Zfp953	13	67,487,373 - 67,508,691 (-)		Zfp953	13	67,487,373 - 67,508,691 (-)		Zfp953	13	67,487,373 - 67,508,691 (-)		Zfp953	13	67,487,373 - 67,508,691 (-)		Zfp953	13	67,487,373 - 67,508,691 (-)
Zfp235	7	23,833,594 - 23,842,666 (+)		Zfp748	13	67,686,758 - 67,701,257 (-)		Zfp748	13	67,686,758 - 67,701,257 (-)		Zfp748	13	67,686,758 - 67,701,257 (-)		Zfp748	13	67,686,758 - 67,701,257 (-)		Zfp748	13	67,686,758 - 67,701,257 (-)		Zfp748	13	67,686,758 - 67,701,257 (-)		Zfp748	13	67,686,758 - 67,701,257 (-)		Zfp748	13	67,686,758 - 67,701,257 (-)		Zfp748	13	67,686,758 - 67,701,257 (-)		Zfp748	13	67,686,758 - 67,701,257 (-)
Zfp428	7	24,203,973 - 24,215,107 (+)		Zfp65	13	67,853,428 - 67,877,238 (-)		Zfp65	13	67,853,428 - 67,877,238 (-)		Zfp65	13	67,853,428 - 67,877,238 (-)		Zfp65	13	67,853,428 - 67,877,238 (-)		Zfp65	13	67,853,428 - 67,877,238 (-)		Zfp65	13	67,853,428 - 67,877,238 (-)		Zfp65	13	67,853,428 - 67,877,238 (-)		Zfp65	13	67,853,428 - 67,877,238 (-)		Zfp65	13	67,853,428 - 67,877,238 (-)		Zfp65	13	67,853,428 - 67,877,238 (-)
Zfp575	7	24,283,942 - 24,287,049 (-)		Zfp273	13	67,961,935 - 67,975,119 (+)		Zfp273	13	67,961,935 - 67,975,119 (+)		Zfp273	13	67,961,935 - 67,975,119 (+)		Zfp273	13	67,961,935 - 67,975,119 (+)		Zfp273	13	67,961,935 - 67,975,119 (+)		Zfp273	13	67,961,935 - 67,975,119 (+)		Zfp273	13	67,961,935 - 67,975,119 (+)		Zfp273	13	67,961,935 - 67,975,119 (+)		Zfp273	13	67,961,935 - 67,975,119 (+)		Zfp273	13	67,961,935 - 67,975,119 (+)
Zfp59	7	27,538,032 - 27,555,863 (+)		Zfp960	17	17,284,365 - 17,309,893 (+)		Zfp960	17	17,284,365 - 17,309,893 (+)		Zfp960	17	17,284,365 - 17,309,893 (+)		Zfp960	17	17,284,365 - 17,309,893 (+)		Zfp960	17	17,284,365 - 17,309,893 (+)		Zfp960	17	17,284,365 - 17,309,893 (+)		Zfp960	17	17,284,365 - 17,309,893 (+)		Zfp960	17	17,284,365 - 17,309,893 (+)		Zfp960	17	17,284,365 - 17,309,893 (+)		Zfp960	17	17,284,365 - 17,309,893 (+)
Zfp36	7	28,076,208 - 28,078,680 (-)		Zfp97	17	17,341,372 - 17,367,400 (+)		Zfp97	17	17,341,372 - 17,367,400 (+)		Zfp97	17	17,341,372 - 17,367,400 (+)		Zfp97	17	17,341,372 - 17,367,400 (+)		Zfp97	17	17,341,372 - 17,367,400 (+)		Zfp97	17	17,341,372 - 17,367,400 (+)		Zfp97	17	17,341,372 - 17,367,400 (+)		Zfp97	17	17,341,372 - 17,367,400 (+)		Zfp97	17	17,341,372 - 17,367,400 (+)		Zfp97	17	17,341,372 - 17,367,400 (+)
Zfp30	7	29,483,423 - 29,494,127 (+)		Zfp760	17	21,926,412 - 21,944,616 (+)		Zfp760	17	21,926,412 - 21,944,616 (+)		Zfp760	17	21,926,412 - 21,944,616 (+)		Zfp760	17	21,926,412 - 21,944,616 (+)		Zfp760	17	21,926,412 - 21,944,616 (+)		Zfp760	17	21,926,412 - 21,944,616 (+)		Zfp760	17	21,926,412 - 21,944,616 (+)		Zfp760	17	21,926,412 - 21,944,616 (+)		Zfp760	17	21,926,412 - 21,944,616 (+)		Zfp760	17	21,926,412 - 21,944,616 (+)
Zfp940	7	29,533,943 - 29,553,101 (-)		Zfp820	17	22,035,857 - 22,064,740 (-)		Zfp820	17	22,035,857 - 22,064,740 (-)		Zfp820	17	22,035,857 - 22,064,740 (-)		Zfp820	17	22,035,857 - 22,064,740 (-)		Zfp820	17	22,035,857 - 22,064,740 (-)		Zfp820	17	22,035,857 - 22,064,740 (-)		Zfp820	17	22,035,857 - 22,064,740 (-)		Zfp820	17	22,035,857 - 22,064,740 (-)		Zfp820	17	22,035,857 - 22,064,740 (-)		Zfp820	17	22,035,857 - 22,064,740 (-)
Zfp619	7	39,165,143 - 39,189,844 (+)		Zfp947	17	22,363,336 - 22,385,153 (-)		Zfp947	17	22,363,336 - 22,385,153 (-)		Zfp947	17	22,363,336 - 22,385,153 (-)		Zfp947	17	22,363,336 - 22,385,153 (-)		Zfp947	17	22,363,336 - 22,385,153 (-)		Zfp947	17	22,363,336 - 22,385,153 (-)		Zfp947	17	22,363,336 - 22,385,153 (-)		Zfp947	17	22,363,336 - 22,385,153 (-)		Zfp947	17	22,363,336 - 22,385,153 (-)		Zfp947	17	22,363,336 - 22,385,153 (-)
Zfp579	7	4,995,851 - 4,999,100 (-)		Zfp994	17	22,416,246 - 22,444,597 (-)		Zfp994	17	22,416,246 - 22,444,597 (-)		Zfp994	17	22,416,246 - 22,444,597 (-)		Zfp994	17	22,416,246 - 22,444,597 (-)		Zfp994	17	22,416,246 - 22,444,597 (-)		Zfp994	17	22,416,246 - 22,444,597 (-)		Zfp994	17	22,416,246 - 22,444,597 (-)		Zfp994	17	22,416,246 - 22,444,597 (-)		Zfp994	17	22,416,246 - 22,444,597 (-)		Zfp994	17	22,416,246 - 22,444,597 (-)
AW146154	7	41,128,298 - 41,149,314 (-)		Zfp871	17	32,984,470 - 33,007,261 (-)		Zfp871	17	32,984,470 - 33,007,261 (-)		Zfp871	17	32,984,470 - 33,007,261 (-)		Zfp871	17	32,984,470 - 33,007,261 (-)		Zfp871	17	32,984,470 - 33,007,261 (-)		Zfp871	17	32,984,470 - 33,007,261 (-)		Zfp871	17	32,984,470 - 33,007,261 (-)		Zfp871	17	32,984,470 - 33,007,261 (-)		Zfp871	17	32,984,470 - 33,007,261 (-)		Zfp871	17	32,984,470 - 33,007,261 (-)
2610021A01Rik	7	41,248,654 - 41,277,957 (+)		Zfp811	17	33,014,650 - 33,029,033 (-)		Zfp811	17	33,014,650 - 33,029,033 (-)		Zfp811	17	33,014,650 - 33,029,033 (-)		Zfp811	17	33,014,650 - 33,029,033 (-)		Zfp811	17	33,014,650 - 33,029,033 (-)		Zfp811	17	33,014,650 - 33,029,033 (-)		Zfp811	17	33,014,650 - 33,029,033 (-)		Zfp811	17	33,014,650 - 33,029,033 (-)		Zfp811	17	33,014,650 - 33,029,033 (-)		Zfp811	17	33,014,650 - 33,029,033 (-)
Zfp580	7	5,041,682 - 5,056,722 (+)		Zfp955b	17	33,508,495 - 33,526,213 (+)		Zfp955b	17	33,508,495 - 33,526,213 (+)		Zfp955b	17	33,508,495 - 33,526,213 (+)		Zfp955b	17	33,508,495 - 33,526,213 (+)		Zfp955b	17	33,508,495 - 33,526,213 (+)		Zfp955b	17	33,508,495 - 33,526,213 (+)		Zfp955b	17	33,508,495 - 33,526,213 (+)		Zfp955b	17	33,508,495 - 33,526,213 (+)		Zfp955b	17	33,508,495 - 33,526,213 (+)		Zfp955b	17	33,508,495 - 33,526,213 (+)
Zfp667	7	6,289,187 - 6,310,882 (+)		Zfp101	17	33,599,148 - 33,613,593 (-)		Zfp101	17	33,599,148 - 33,613,593 (-)		Zfp101	17	33,599,148 - 33,613,593 (-)		Zfp101	17	33,599,148 - 33,613,593 (-)		Zfp101	17	33,599,148 - 33,613,593 (-)		Zfp101	17	33,599,148 - 33,613,593 (-)		Zfp101	17	33,599,148 - 33,613,593 (-)		Zfp101	17	33,599,148 - 33,613,593 (-)		Zfp101	17	33,599,148 - 33,613,593 (-)		Zfp101	17	33,599,148 - 33,613,593 (-)
Zfp28	7	6,386,317 - 6,399,636 (+)		Gm14434	2	176,165,071 - 176,178,576 (-)		Gm14434	2	176,165,071 - 176,178,576 (-)		Gm14434	2	176,165,071 - 176,178,576 (-)		Gm14434	2	176,165,071 - 176,178,576 (-)		Gm14434	2	176,165,071 - 176,178,576 (-)		Gm14434	2	176,165,071 - 176,178,576 (-)		Gm14434	2	176,165,071 - 176,178,576 (-)		Gm14434	2	176,165,071 - 176,178,576 (-)		Gm14434	2	176,165,071 - 176,178,576 (-)		Gm14434	2	176,165,071 - 176,178,576 (-)
Zim1	7	6,677,443 - 6,699,521 (-)		Gm14305	2	176,400,146 - 176,413,606 (+)		Gm14305	2	176,400,146 - 176,413,606 (+)		Gm14305	2	176,400,146 - 176,413,606 (+)		Gm14305	2	176,400,146 - 176,413,606 (+)		Gm14305	2	176,400,146 - 176,413,606 (+)		Gm14305	2	176,400,146 - 176,413,606 (+)		Gm14305	2	176,400,146 - 176,413,606 (+)		Gm14305	2	176,400,146 - 176,413,606 (+)		Gm14305	2	176,400,146 - 176,413,606 (+)		Gm14305	2	176,400,146 - 176,413,606 (+)
Zfp773	7	7,133,677 - 7,139,754 (-)		Gm14419	2	176,692,716 - 176,704,884 (+)		Gm14419	2	176,692,716 - 176,704,884 (+)		Gm14419	2	176,692,716 - 176,704,884 (+)		Gm14419	2	176,692,716 - 176,704,884 (+)		Gm14419	2	176,692,716 - 176,704,884 (+)		Gm14419	2	176,692,716 - 176,704,884 (+)		Gm14419	2	176,692,716 - 176,704,884 (+)		Gm14419	2	176,692,716 - 176,704,884 (+)		Gm14419	2	176,692,716 - 176,704,884 (+)		Gm14419	2	176,692,716 - 176,704,884 (+)
Zfp710	7	79,674,581 - 79,742,498 (+)		Zfp970	2	177,156,096 - 177,170,987 (+)		Zfp970	2	177,156,096 - 177,170,987 (+)		Zfp970	2	177,156,096 - 177,170,987 (+)		Zfp970	2	177,156,096 - 177,170,987 (+)		Zfp970	2	177,156,096 - 177,170,987 (+)		Zfp970	2	177,156,096 - 177,170,987 (+)		Zfp970	2	177,156,096 - 177,170,987 (+)		Zfp970	2	177,156,096 - 177,170,987 (+)		Zfp970	2	177,156,096 - 177,170,987 (+)		Zfp970	2	177,156,096 - 177,170,987 (+)
Zfp592	7	80,643,432 - 80,694,912 (+)		Zfp59	7	27,538,032 - 27,555,863 (+)		Zfp59	7	27,538,032 - 27,555,863 (+)		Zfp59	7	27,538,032 - 27,555,863 (+)		Zfp59	7	27,538,032 - 27,555,863 (+)		Zfp59	7	27,538,032 - 27,555,863 (+)		Zfp59	7	27,538,032 - 27,555,863 (+)		Zfp59	7	27,538,032 - 27,555,863 (+)		Zfp59	7	27,538,032 - 27,555,863 (+)		Zfp59	7	27,538,032 - 27,555,863 (+)		Zfp59	7	27,538,032 - 27,555,863 (+)
Zfp419	7	9,061,491 - 9,068,439 (-)		Zfp36	7	28,076,208 - 28,078,680 (-)		Zfp36	7	28,076,208 - 28,078,680 (-)		Zfp36	7	28,076,208 - 28,078,680 (-)		Zfp36	7	28,076,208 - 28,078,680 (-)		Zfp36	7	28,076,208 - 28,078,680 (-)		Zfp36	7	28,076,208 - 28,078,680 (-)		Zfp36	7	28,076,208 - 28,078,680 (-)		Zfp36	7	28,076,208 - 28,078,680 (-)		Zfp36	7	28,076,208 - 28,078,680 (-)		Zfp36	7	28,076,208 - 28,078,680 (-)
Zfp90	8	107,141,929 - 107,153,575 (+)		Zfp354c	11	50,701,913 - 50,718,551 (-)		Zfp354c	11	50,701,913 - 50,718,551 (-)		Zfp354c	11	50,701,913 - 50,718,551 (-)		Zfp354c	11	50,701,913 - 50,718,551 (-)		Zfp354c	11	50,701,913 - 50,718,551 (-)		Zfp354c	11	50,701,913 - 50,718,551 (-)		Zfp354c	11	50,701,913 - 50,718,551 (-)		Zfp354c	11	50,701,913 - 50,718,551 (-)		Zfp354c	11	50,701,913 - 50,718,551 (-)		Zfp354c	11	50,701,913 - 50,718,551 (-)
Zfp1	8	112,370,033 - 112,397,643 (+)		Zfp354a	11	50,950,084 - 50,963,626 (+)		Zfp354a	11	50,950,084 - 50,963,626 (+)		Zfp354a	11	50,950,084 - 50,963,626 (+)		Zfp354a	11	50,950,084 - 50,963,626 (+)		Zfp354a	11	50,950,084 - 50,963,626 (+)		Zfp354a	11	50,950,084 - 50,963,626 (+)		Zfp354a	11	50,950,084 - 50,963,626 (+)		Zfp354a	11	50,950,084 - 50,963,626 (+)		Zfp354a	11	50,950,084 - 50,963,626 (+)		Zfp354a	11	50,950,084 - 50,963,626 (+)
Zfp276	8	123,980,934 - 123,996,484 (+)		Zfp236	18	82,611,718 - 82,711,008 (-)		Zfp236	18	82,611,718 - 82,711,008 (-)		Zfp236	18	82,611,718 - 82,711,008 (-)		Zfp236	18	82,611,718 - 82,711,008 (-)		Zfp236	18	82,611,718 - 82,711,008 (-)		Zfp236	18	82,611,718 - 82,711,008 (-)		Zfp236	18	82,611,718 - 82,711,008 (-)		Zfp236	18	82,611,718 - 82,711,008 (-)		Zfp236	18	82,611,718 - 82,711,008 (-)		Zfp236	18	82,611,718 - 82,711,008 (-)
Zfp703	8	27,467,364 - 27,471,490 (+)		Zfp516	18	82,925,324 - 83,023,439 (+)		Zfp516	18	82,925,324 - 83,023,439 (+)		Zfp516	18	82,925,324 - 83,023,439 (+)		Zfp516	18	82,925,324 - 83,023,439 (+)		Zfp516	18	82,925,324 - 83,023,439 (+)		Zfp516	18	82,925,324 - 83,023,439 (+)		Zfp516	18	82,925,324 - 83,023,439 (+)		Zfp516	18	82,925,324 - 83,023,439 (+)		Zfp516	18	82,925,324 - 83,023,439 (+)		Zfp516	18	82,925,324 - 83,023,439 (+)
Zfp964	8	70,107,113 - 70,119,782 (+)		Zfp185	X	72,030,860 - 72,075,149 (+)		Zfp185	X	72,030,860 - 72,075,149 (+)		Zfp185	X	72,030,860 - 72,075,149 (+)		Zfp185	X	72,030,860 - 72,075,149 (+)		Zfp185	X	72,030,860 - 72,075,149 (+)		Zfp185	X	72,030,860 - 72,075,149 (+)		Zfp185	X	72,030,860 - 72,075,149 (+)		Zfp185	X	72,030,860 - 72,075,149 (+)		Zfp185	X	72,030,860 - 72,075,149 (+)		Zfp185	X	72,030,860 - 72,075,149 (+)
Zfp869	8	70,157,787 - 70,169,718 (-)		Zfp92	X	72,454,555 - 72,473,980 (+)		Zfp92	X	72,454,555 - 72,473,980 (+)		Zfp92	X	72,454,555 - 72,473,980 (+)		Zfp92	X	72,454,555 - 72,473,980 (+)		Zfp92	X	72,454,555 - 72,473,980 (+)		Zfp92	X	72,454,555 - 72,473,980 (+)		Zfp92	X	72,454,555 - 72,473,980 (+)		Zfp92	X	72,454,555 - 72,473,980 (+)		Zfp92	X	72,454,555 - 72,473,980 (+)		Zfp92	X	72,454,555 - 72,473,980 (+)
Zfp882	8	72,662,450 - 72,672,695 (+)
Zfp827	8	79,753,754 - 79,920,397 (+)
Zfp660	9	122,732,313 - 122,743,223 (+)		Zfp268				Zfp268				Zfp419				Gm14434				4930522L14Rik	up			4930522L14Rik	up			Zfp41				2610008E11Rik				Zfp740				Zfp1
Zfp105	9	122,752,137 - 122,760,093 (+)		Zfp428	down			Zfp365				Zfp57				Zfp268				Gm3604				AW146154				Zfp419				2610021A01Rik				Zfp934				Zfp101
Zfp26	9	20,338,457 - 20,371,465 (-)		Zfp516				Zfp503								Zfp419				Zfp57				Gm3604	up			Zfp488				Gm14305	down			Zfp994				Zfp105	down
Zfp266	9	20,406,364 - 20,432,715 (-)		Zfp575	down			Zfp516								Zfp57				Zfp1007	up			Gm5581				Zfp518a				Gm14419	up			Zim1				Zfp11
Zfp846	9	20,492,595 - 20,516,706 (+)		Zfp579	down			Zfp518a																Pogk				Zfp57				Zfp1007								Zfp110	down
Zfp810	9	22,188,044 - 22,218,944 (-)		Zfp580	down			Zfp57																Zfp1007	up			Zfp773				Zfp128								Zfp113
Zfp609	9	65,599,673 - 65,734,846 (-)		Zfp697				Zfp677																Zfp1008	up			Zfp831				Zfp133ps								Zfp119b
Zfp365	10	67,721,935 - 67,748,492 (-)		Zfp771				Zfp811																Zfp185	up							Zfp185								Zfp12
Zfp280b	10	75,868,235 - 75,878,804 (+)		Zfp804b				Zfp831																Zfp28								Zfp26	down							Zfp120
2610008E11Rik	10	78,900,208 - 78,933,434 (-)		Zfp940				Zfp947																Zfp419								Zfp28	up							Zfp142
Zfp354c	11	50,701,913 - 50,718,551 (-)																						Zfp442	up							Zfp217								Zfp207
Zfp354a	11	50,950,084 - 50,963,626 (+)																						Zfp462								Zfp266	down							Zfp235
Zfp39	11	58,778,979 - 58,795,051 (-)																						Zfp57								Zfp280b								Zfp236
Zfp867	11	59,352,023 - 59,363,300 (-)		In cluster	4	2	12	9																Zfp703								Zfp36								Zfp251
Zfp207	11	80,274,105 - 80,296,559 (+)		Total	10	10	2	4	4	25	7	40												Zfp808	up							Zfp36l1								Zfp273	down
Zfp386	12	116,011,334 - 116,026,851 (+)																						Zfp827								Zfp36l2								Zfp276
Zfp36l1	12	80,154,534 - 80,159,787 (-)																						Zfp92	up							Zfp369								Zfp30
Zkscan3	13	21,571,173 - 21,586,925 (-)																						Zfp934	up							Zfp40								Zfp37
Zfp192	13	21,697,391 - 21,715,284 (-)																						Zfp937	up							Zfp407								Zfp39
Zfp808	13	62,277,674 - 62,321,752 (+)																						Zfp951								Zfp41								Zfp300
Gm3604	13	62,516,142 - 62,530,991 (-)																						Zfp960	up							Zfp419								Zfp324	up
Zfp934	13	62,664,609 - 62,727,170 (-)		In cluster	27																			Zfp964								Zfp488								Zfp335
Zfp1008	13	62,750,827 - 62,771,996 (-)		Total	102																			Zfp97	up							Zfp518a								Zfp354a	up
Zfp369	13	65,411,975 - 65,452,038 (+)																						Zfp970								Zfp57								Zfp354c	up
Zfp712	13	67,186,658 - 67,209,234 (-)																						Zkscan16								Zfp619								Zfp366
Zfp759	13	67,273,040 - 67,290,468 (+)																														Zfp667	down							Zfp386
Zfp458	13	67,402,982 - 67,426,530 (-)																														Zfp683								Zfp398
Zfp953	13	67,487,373 - 67,508,691 (-)																														Zfp703								Zfp40
Zfp748	13	67,686,758 - 67,701,257 (-)																														Zfp704								Zfp41
Zfp65	13	67,853,428 - 67,877,238 (-)																														Zfp710								Zfp407
Zfp273	13	67,961,935 - 67,975,119 (+)																														Zfp712								Zfp419
Zfp366	13	99,321,331 - 99,383,540 (+)																														Zfp760								Zfp451
Zfp503	14	22,034,030 - 22,039,669 (-)																														Zfp811	down							Zfp458	down
Zfp488	14	33,689,023 - 33,700,986 (-)																														Zfp827								Zfp518a
Zfp740	15	102,112,080 - 102,124,045 (+)																														Zfp831								Zfp518b
Zfp41	15	5,486,972 - 75,501,676 (+)																														Zfp846	down							Zfp553
Zfp251	15	76,736,331 - 76,755,635 (-)																														Zfp871	down							Zfp57
Zfp960	17	17,284,365 - 17,309,893 (+)																														Zfp882								Zfp59
Zfp97	17	17,341,372 - 17,367,400 (+)																														Zfp90								Zfp592
Zfp677	17	21,603,972 - 21,619,527 (+)																														Zfp955b								Zfp598
Zfp760	17	21,926,412 - 21,944,616 (+)																																						Zfp609
Zfp820	17	22,035,857 - 22,064,740 (-)																																						Zfp646
Zfp947	17	22,363,336 - 22,385,153 (-)																																						Zfp65	down
Zfp994	17	22,416,246 - 22,444,597 (-)																																						Zfp660	down
Zfp40	17	23,392,843 - 23,412,226 (-)																																						Zfp740
Zfp598	17	24,888,661 - 24,900,990 (+)																																						Zfp748	down
Zfp871	17	32,984,470 - 33,007,261 (-)																																						Zfp759	down
Zfp811	17	33,014,650 - 33,029,033 (-)																																						Zfp808	down
Zfp955b	17	33,508,495 - 33,526,213 (+)																																						Zfp810
Zfp101	17	33,599,148 - 33,613,593 (-)																																						Zfp820
Zfp57	17	37,307,060 - 37,326,196 (+)																																						Zfp867
Zfp119b	17	56,245,381 - 56,256,500 (-)																																						Zfp869
Zfp36l2	17	84,491,352 - 84,495,375 (-)																																						Zfp934	down
Zfp236	18	82,611,718 - 82,711,008 (-)																																						Zfp937
Zfp516	18	82,925,324 - 83,023,439 (+)																																						Zfp941
Zfp407	18	84,225,826 - 84,612,815 (-)																																						Zfp953	down
Zfp518a	19	40,882,472 - 40,906,391 (+)																																						Zfp979	down
Zfp300	X	20,945,413 - 20,955,766 (-)																																						Zfp982	down
Zfp185	X	72,030,860 - 72,075,149 (+)																																						Zfp994
Zfp92	X	72,454,555 - 72,473,980 (+)																																						Zfp192	down
																																								Zik1
																																								Zim1
																																								Zkscan3	up

## Sheet: CTX YM
Gene	baseMean	log2FoldChange	lfcSE	stat	pvalue	padj	Volcano FDR
ENSMUSG00000078502	31.4795	2.61486	0.357047	7.32358	2.41444e-13	4.22263e-10	9.37442
ENSMUSG00000050855	733.008	0.262425	0.0800123	3.27981	0.00103877	0.0370072	1.43171
ENSMUSG00000078502	Gm13212 (Zfp268)
ENSMUSG00000050855	Zfp940
ENSMUSG00000109006	2158.25	0.675958	0.0659117	10.2555	1.11793e-24	2.15068e-20	19.6674
ENSMUSG00000103332	706.118	0.684154	0.0688157	9.94182	2.73774e-23	2.63344e-19	18.5795
ENSMUSG00000020891	246.326	0.953168	0.106866	8.91926	4.69406e-19	2.55082e-15	14.5933
ENSMUSG00000051242	761.416	0.921874	0.103515	8.90573	5.3037e-19	2.55082e-15	14.5933
ENSMUSG00000009075	490.579	0.958533	0.1088	8.81001	1.25139e-18	4.81486e-15	14.3174
ENSMUSG00000041828	332.597	0.997634	0.120493	8.27957	1.23616e-16	3.96355e-13	12.4019
ENSMUSG00000115529	65.6311	-1.93438	0.243372	-7.94825	1.89164e-15	5.19877e-12	11.2841
ENSMUSG00000090667	993.771	0.980526	0.126073	7.77747	7.39911e-15	1.7793e-11	10.7498
ENSMUSG00000009376	352.735	-0.969097	0.130697	-7.41484	1.21772e-13	2.60294e-10	9.58454
ENSMUSG00000087620	2407.12	0.361516	0.0489615	7.38368	1.53968e-13	2.96203e-10	9.52841
ENSMUSG00000045498	424.13	0.649459	0.0889891	7.29818	2.91677e-13	4.67606e-10	9.33012
ENSMUSG00000103793	874.944	0.558618	0.0770134	7.25352	4.0607e-13	6.00922e-10	9.22118
ENSMUSG00000076441	714.445	0.710179	0.0983906	7.21795	5.27759e-13	7.25216e-10	9.13953
ENSMUSG00000025888	105.811	1.32691	0.185253	7.16271	7.90998e-13	1.01448e-09	8.99376
ENSMUSG00000051599	375.58	0.804478	0.11777	6.8309	8.43827e-12	1.0146e-08	7.99371
ENSMUSG00000041608	355.425	0.563194	0.0843367	6.67792	2.42359e-11	2.74265e-08	7.56183
ENSMUSG00000090071	11155	-0.436588	0.066157	-6.59926	4.13214e-11	4.41634e-08	7.35494
ENSMUSG00000103897	787.656	0.445335	0.0676982	6.57823	4.76072e-11	4.82036e-08	7.31692
ENSMUSG00000069662	6323.64	-0.376885	0.0575982	-6.54335	6.01578e-11	5.78658e-08	7.23758
ENSMUSG00000044847	1349.65	-0.600539	0.092025	-6.52583	6.7627e-11	6.18013e-08	7.209
ENSMUSG00000076431	872.097	-0.527327	0.0808881	-6.51922	7.06741e-11	6.18013e-08	7.209
ENSMUSG00000028222	4246.94	-0.489562	0.0755166	-6.48284	9.00144e-11	7.52912e-08	7.12326
ENSMUSG00000093773	22.544	2.11373	0.327251	6.45905	1.05362e-10	8.44564e-08	7.07337
ENSMUSG00000090061	3480.14	-0.457204	0.0721695	-6.33514	2.37126e-10	1.82473e-07	6.7388
ENSMUSG00000026414	141.348	1.00524	0.159158	6.31601	2.68409e-10	1.98602e-07	6.70202
ENSMUSG00000045876	296.356	0.719665	0.114378	6.29197	3.13463e-10	2.23348e-07	6.65102
ENSMUSG00000043439	2495.54	-0.656394	0.104584	-6.27621	3.46924e-10	2.38362e-07	6.62276
ENSMUSG00000069265	24.7393	-2.17224	0.3466	-6.26729	3.67384e-10	2.43715e-07	6.61312
ENSMUSG00000051678	311.693	0.578605	0.0929158	6.22719	4.74868e-10	3.04517e-07	6.51639
ENSMUSG00000030223	720.597	-0.595966	0.095903	-6.21426	5.15674e-10	3.20017e-07	6.49483
ENSMUSG00000032323	116.26	-0.810678	0.131083	-6.18447	6.23096e-10	3.74597e-07	6.42644
ENSMUSG00000046743	2314.4	-0.419484	0.0679944	-6.16939	6.8556e-10	3.99661e-07	6.39831
ENSMUSG00000113121	372.514	-0.768098	0.125728	-6.10918	1.00143e-09	5.66633e-07	6.2467
ENSMUSG00000020889	4902.6	0.404099	0.067319	6.00275	1.94006e-09	1.06637e-06	5.97209
ENSMUSG00000031170	87.7367	-0.906358	0.151855	-5.96857	2.39343e-09	1.27902e-06	5.89312
ENSMUSG00000052504	556.385	-0.637652	0.107815	-5.9143	3.33293e-09	1.73294e-06	5.76122
ENSMUSG00000056999	5449.69	-0.590259	0.100673	-5.86311	4.54284e-09	2.29987e-06	5.6383
ENSMUSG00000096107	102.577	0.962171	0.16484	5.83701	5.31452e-09	2.62156e-06	5.58144
ENSMUSG00000030256	1658.55	0.440026	0.0756339	5.81784	5.96118e-09	2.85779e-06	5.54397
ENSMUSG00000056656	184.725	0.593839	0.102135	5.81425	6.09052e-09	2.85779e-06	5.54397
ENSMUSG00000024598	249.536	-0.808569	0.13963	-5.7908	7.005e-09	3.20862e-06	5.49368
ENSMUSG00000017400	5005.31	0.314827	0.0548537	5.7394	9.50141e-09	4.15428e-06	5.3815
ENSMUSG00000041596	599.933	1.677	0.292007	5.74299	9.30174e-09	4.15428e-06	5.3815
ENSMUSG00000090799	393.283	0.474787	0.0828719	5.72917	1.00924e-08	4.31463e-06	5.36506
ENSMUSG00000044352	1692.66	-0.48738	0.0857938	-5.68083	1.34042e-08	5.60588e-06	5.25136
ENSMUSG00000105594	200.746	0.922365	0.162487	5.67654	1.37449e-08	5.62603e-06	5.2498
ENSMUSG00000020732	106.614	0.889401	0.157735	5.63856	1.71479e-08	6.87275e-06	5.16287
ENSMUSG00000021214	99.4171	1.11284	0.198241	5.61354	1.98223e-08	7.78249e-06	5.10888
ENSMUSG00000053411	1877.06	0.252415	0.0453206	5.56955	2.55393e-08	9.82652e-06	5.0076
ENSMUSG00000054716	345.431	-0.961722	0.172996	-5.55922	2.70978e-08	1.02217e-05	4.99048
ENSMUSG00000045689	338.902	0.618205	0.111321	5.55336	2.80226e-08	1.03673e-05	4.98434
ENSMUSG00000116525	131.096	-0.8252	0.149135	-5.53325	3.1436e-08	1.14107e-05	4.94269
ENSMUSG00000041741	189.07	-0.667334	0.120738	-5.52711	3.25549e-08	1.1598e-05	4.93562
ENSMUSG00000047945	748.528	-0.618527	0.112188	-5.51333	3.52114e-08	1.23163e-05	4.90952
ENSMUSG00000041120	975.327	-0.341129	0.0619793	-5.50391	3.7145e-08	1.27606e-05	4.89413
ENSMUSG00000011256	1229.87	-0.585194	0.106978	-5.4702	4.49524e-08	1.51718e-05	4.81896
ENSMUSG00000038550	516.208	0.658428	0.12069	5.45554	4.88254e-08	1.61949e-05	4.79062
ENSMUSG00000100586	29.8512	1.83783	0.337067	5.45242	4.96889e-08	1.6202e-05	4.79043
ENSMUSG00000032174	3712.14	-0.417395	0.0765953	-5.44936	5.05514e-08	1.62084e-05	4.79026
ENSMUSG00000086181	134.503	-0.754883	0.139412	-5.41478	6.13654e-08	1.93532e-05	4.71325
ENSMUSG00000022076	151.082	-0.998534	0.185231	-5.39074	7.01672e-08	2.17722e-05	4.6621
ENSMUSG00000051486	479.184	0.51393	0.0955629	5.37792	7.53497e-08	2.30092e-05	4.6381
ENSMUSG00000022656	2706.58	-0.522649	0.0975913	-5.35549	8.53241e-08	2.56479e-05	4.59095
ENSMUSG00000071076	2444.69	-0.516641	0.0966845	-5.34357	9.11316e-08	2.69722e-05	4.56908
ENSMUSG00000030994	237.224	0.481164	0.0903016	5.32842	9.90724e-08	2.8757e-05	4.54126
ENSMUSG00000063687	441.993	0.491529	0.0922807	5.32645	1.00152e-07	2.8757e-05	4.54126
ENSMUSG00000026452	5226.24	0.402173	0.0755446	5.32365	1.01705e-07	2.87736e-05	4.54101
ENSMUSG00000044726	38.7798	1.30002	0.244492	5.31722	1.05363e-07	2.93764e-05	4.532
ENSMUSG00000059182	643.045	0.364081	0.0686294	5.30503	1.12653e-07	3.09602e-05	4.5092
ENSMUSG00000104868	679.724	-0.372054	0.0708461	-5.25157	1.50808e-07	4.08626e-05	4.38867
ENSMUSG00000056116	680.566	0.44871	0.0860047	5.21727	1.81577e-07	4.78517e-05	4.3201
ENSMUSG00000113651	22.0681	1.46459	0.280679	5.21801	1.80854e-07	4.78517e-05	4.3201
ENSMUSG00000027358	128.179	-0.646467	0.124289	-5.20131	1.97892e-07	5.14465e-05	4.28864
ENSMUSG00000026179	5760.36	0.283587	0.0546284	5.19119	2.08952e-07	5.35976e-05	4.27085
ENSMUSG00000004031	5442.44	-0.223183	0.0431294	-5.17472	2.2825e-07	5.77772e-05	4.23824
ENSMUSG00000006920	2856.42	0.295375	0.057229	5.16129	2.45252e-07	6.0715e-05	4.2167
ENSMUSG00000034686	362.825	-1.0964	0.212456	-5.16059	2.46167e-07	6.0715e-05	4.2167
ENSMUSG00000027199	2936.29	0.509994	0.0991787	5.14217	2.7158e-07	6.58559e-05	4.18141
ENSMUSG00000060675	769.748	0.516944	0.100561	5.1406	2.73857e-07	6.58559e-05	4.18141
ENSMUSG00000047307	478.121	0.493221	0.0968581	5.0922	3.53929e-07	8.40604e-05	4.07541
ENSMUSG00000034685	1944.95	-0.344079	0.067636	-5.08722	3.63352e-07	8.52459e-05	4.06933
ENSMUSG00000033768	17059.2	-0.387888	0.0765497	-5.06714	4.03841e-07	9.36035e-05	4.02871
ENSMUSG00000042388	12328.7	-0.450216	0.0889147	-5.06347	4.11699e-07	9.42888e-05	4.02554
ENSMUSG00000052759	33.2927	-1.25171	0.247864	-5.05	4.41814e-07	9.99955e-05	4.00002
ENSMUSG00000006522	729.878	0.458789	0.0911332	5.03427	4.79676e-07	0.000107302	3.96939
ENSMUSG00000031805	185.644	-0.617938	0.123096	-5.01996	5.16826e-07	0.000114284	3.94202
ENSMUSG00000026043	215.985	-1.18967	0.237201	-5.01544	5.29119e-07	0.000115673	3.93677
ENSMUSG00000049932	604.79	-0.437446	0.0872627	-5.01297	5.35951e-07	0.00011585	3.93611
ENSMUSG00000044043	1213.46	0.311319	0.06223	5.00271	5.65295e-07	0.000120835	3.91781
ENSMUSG00000034201	1656.74	-0.326416	0.0652941	-4.99916	5.75801e-07	0.000121728	3.91461
ENSMUSG00000000792	516.991	0.64986	0.130561	4.97743	6.44331e-07	0.000134735	3.87052
ENSMUSG00000002341	14200.4	-0.2421	0.0489787	-4.94297	7.69432e-07	0.000157472	3.8028
ENSMUSG00000034768	101.708	0.729155	0.147472	4.94434	7.64006e-07	0.000157472	3.8028
ENSMUSG00000032356	21993.4	0.253013	0.0514267	4.91986	8.66043e-07	0.000175378	3.75602
ENSMUSG00000048616	288.116	-0.466455	0.0949627	-4.91198	9.01628e-07	0.000180683	3.74308
ENSMUSG00000028763	778.175	-0.588337	0.120331	-4.88932	1.01186e-06	0.000200681	3.69749
ENSMUSG00000055633	316.964	-0.53492	0.109463	-4.88676	1.02509e-06	0.000200923	3.69697
ENSMUSG00000106644	98.0418	0.691832	0.141622	4.88506	1.03396e-06	0.000200923	3.69697
ENSMUSG00000061186	190.301	-0.480572	0.0984863	-4.87958	1.06312e-06	0.000204523	3.68926
ENSMUSG00000001663	253.47	0.560454	0.114991	4.87388	1.09425e-06	0.000208428	3.68104
ENSMUSG00000031618	2753.85	0.284821	0.0586512	4.85619	1.19667e-06	0.000225701	3.64647
ENSMUSG00000040565	5033.25	-0.34808	0.0718378	-4.84536	1.26381e-06	0.00023605	3.627
ENSMUSG00000020914	26.3244	-1.32324	0.273659	-4.83535	1.32914e-06	0.000245865	3.6093
ENSMUSG00000005397	504.785	-0.69393	0.14426	-4.81027	1.50728e-06	0.000276163	3.55883
ENSMUSG00000047419	945.86	0.302916	0.0630351	4.80552	1.54348e-06	0.000280128	3.55264
ENSMUSG00000055067	1648.62	0.316545	0.0659102	4.80267	1.56564e-06	0.000281493	3.55053
ENSMUSG00000040649	879.4	-0.308152	0.0642117	-4.799	1.5946e-06	0.000284045	3.54661
ENSMUSG00000074776	151.042	0.685849	0.143234	4.78831	1.68191e-06	0.000296849	3.52746
ENSMUSG00000040125	18967.8	-0.28688	0.0599757	-4.78326	1.72475e-06	0.000301644	3.52051
ENSMUSG00000063632	972.986	-0.496968	0.104406	-4.75994	1.93649e-06	0.000335623	3.47415
ENSMUSG00000029004	9084.15	0.195293	0.0411959	4.7406	2.13091e-06	0.000366022	3.43649
ENSMUSG00000013858	2106.69	-0.243406	0.0513744	-4.73788	2.15967e-06	0.000367679	3.43453
ENSMUSG00000075012	1386.31	-0.383411	0.0809644	-4.73555	2.1846e-06	0.000368662	3.43337
ENSMUSG00000003346	1923.23	-0.384255	0.081284	-4.72731	2.27509e-06	0.000380594	3.41954
ENSMUSG00000085773	17.7455	1.90443	0.403368	4.72132	2.34314e-06	0.000388598	3.4105
ENSMUSG00000045083	3357.44	-0.306353	0.0649493	-4.71681	2.39573e-06	0.000393923	3.40459
ENSMUSG00000073590	151.137	0.526861	0.111753	4.71453	2.42271e-06	0.000394983	3.40342
ENSMUSG00000014592	20098.8	0.178485	0.0378749	4.71247	2.44729e-06	0.000395639	3.4027
ENSMUSG00002075524	67.8558	-1.62421	0.345257	-4.70435	2.54675e-06	0.000408286	3.38904
ENSMUSG00000021733	1455.91	-0.286341	0.0610592	-4.68957	2.73779e-06	0.000432946	3.36357
ENSMUSG00000022421	26731.9	-0.294476	0.0628461	-4.68566	2.79058e-06	0.000432946	3.36357
ENSMUSG00000084843	54.0174	0.910873	0.194384	4.68595	2.78669e-06	0.000432946	3.36357
ENSMUSG00000085526	73.3951	-0.770326	0.164316	-4.68808	2.75775e-06	0.000432946	3.36357
ENSMUSG00000074892	1212.9	0.391089	0.0836747	4.67393	2.95493e-06	0.000454776	3.3422
ENSMUSG00000020486	3713.04	0.4518	0.0967266	4.67089	2.99897e-06	0.000457891	3.33924
ENSMUSG00000030236	23.8165	-1.98408	0.424983	-4.66861	3.03239e-06	0.000459348	3.33786
ENSMUSG00000050896	1069.43	-0.590177	0.127268	-4.63728	3.53027e-06	0.000530588	3.27524
ENSMUSG00000030337	7400.61	0.368215	0.0794662	4.63361	3.59341e-06	0.000535892	3.27092
ENSMUSG00000030350	3216.29	-0.273154	0.0591474	-4.6182	3.8709e-06	0.000568461	3.2453
ENSMUSG00000040794	1615.09	-0.617118	0.133599	-4.61917	3.85274e-06	0.000568461	3.2453
ENSMUSG00000067203	36.3223	0.974784	0.211182	4.61584	3.91503e-06	0.000570586	3.24368
ENSMUSG00000015846	1256.36	0.259926	0.0563547	4.61232	3.98206e-06	0.000575992	3.23958
ENSMUSG00000098097	83.693	-0.788034	0.171061	-4.60674	4.09041e-06	0.000587248	3.23118
ENSMUSG00000000531	979.549	-0.592194	0.128663	-4.60268	4.17086e-06	0.000594363	3.22595
ENSMUSG00000049493	522.211	0.541211	0.117691	4.59858	4.25385e-06	0.000601732	3.2206
ENSMUSG00000038146	530.141	-0.524787	0.114211	-4.5949	4.32955e-06	0.000607969	3.21612
ENSMUSG00000024044	12251.6	0.179985	0.0392391	4.58687	4.49934e-06	0.000625183	3.20399
ENSMUSG00000059213	22839	-0.339566	0.0740432	-4.58605	4.51713e-06	0.000625183	3.20399
ENSMUSG00000051067	949.059	-0.448335	0.0979545	-4.57697	4.71753e-06	0.000648256	3.18825
ENSMUSG00000044176	246.949	-0.472683	0.103766	-4.55528	5.23169e-06	0.00071381	3.14642
ENSMUSG00000001227	3598.4	-0.335398	0.0737058	-4.5505	5.35176e-06	0.00072505	3.13963
ENSMUSG00000025764	2315.03	0.220654	0.0485743	4.54261	5.55632e-06	0.000739201	3.13124
ENSMUSG00000040274	329.137	-0.52554	0.115706	-4.54203	5.57148e-06	0.000739201	3.13124
ENSMUSG00000053080	1475.29	-0.307349	0.0676554	-4.54286	5.54969e-06	0.000739201	3.13124
ENSMUSG00000043557	764.478	-1.2724	0.280257	-4.54011	5.62243e-06	0.000740851	3.13027
ENSMUSG00000020810	1335.73	0.330371	0.0729754	4.52716	5.9782e-06	0.000782371	3.10659
ENSMUSG00000022419	3163.78	0.295651	0.0654189	4.51935	6.20286e-06	0.000806289	3.09351
ENSMUSG00000004637	833.572	0.29692	0.0657679	4.51467	6.34163e-06	0.000818794	3.08683
ENSMUSG00000026042	156.344	-0.620437	0.137476	-4.51304	6.39041e-06	0.000819591	3.0864
ENSMUSG00000089679	68.1597	1.06108	0.235655	4.50268	6.71023e-06	0.000854911	3.06808
ENSMUSG00000043458	570.421	0.363619	0.0809369	4.49262	7.03517e-06	0.000890412	3.05041
ENSMUSG00000042532	3856.45	-0.206914	0.0461827	-4.48034	7.45255e-06	0.000937073	3.02823
ENSMUSG00000030209	91059.5	-0.264448	0.0591294	-4.47235	7.73639e-06	0.000960211	3.01763
ENSMUSG00000033717	283.689	-0.575934	0.128771	-4.47256	7.72905e-06	0.000960211	3.01763
ENSMUSG00000056306	862.838	-0.372888	0.083511	-4.46514	8.00166e-06	0.000986768	3.00578
ENSMUSG00000046808	257.863	-0.469432	0.105366	-4.45526	8.37922e-06	0.00102675	2.98854
ENSMUSG00000104674	152.84	0.829099	0.186294	4.45047	8.5681e-06	0.00104325	2.98161
ENSMUSG00000052229	1268.18	-0.507668	0.114333	-4.44027	8.98449e-06	0.00108707	2.96374
ENSMUSG00000036466	688.68	-0.488501	0.110053	-4.43879	9.04669e-06	0.00108775	2.96347
ENSMUSG00000104264	32.5862	1.06035	0.239232	4.4323	9.32323e-06	0.00111404	2.9531
ENSMUSG00000055639	295.033	0.651129	0.147034	4.42842	9.4924e-06	0.00112725	2.94798
ENSMUSG00000031167	1812.61	0.448524	0.101357	4.42518	9.63632e-06	0.00112911	2.94726
ENSMUSG00000045318	406.115	-0.47599	0.107534	-4.4264	9.58183e-06	0.00112911	2.94726
ENSMUSG00000061615	21.412	-1.28812	0.291245	-4.4228	9.74284e-06	0.00112911	2.94726
ENSMUSG00000094910	3589.08	-0.273816	0.0619048	-4.42317	9.72623e-06	0.00112911	2.94726
ENSMUSG00000041134	362.192	-0.448716	0.101526	-4.41972	9.88282e-06	0.00113848	2.94368
ENSMUSG00000024810	1314.79	0.576091	0.130743	4.40628	1.05161e-05	0.00120422	2.91929
ENSMUSG00000044667	9000.45	-0.225276	0.0512343	-4.39698	1.09767e-05	0.00124953	2.90325
ENSMUSG00000071637	67.2732	-1.12977	0.257039	-4.39534	1.10601e-05	0.00125161	2.90253
ENSMUSG00000047205	1110.8	-0.408137	0.092962	-4.39037	1.13159e-05	0.00127307	2.89515
ENSMUSG00000104093	85.0877	0.814426	0.185638	4.38719	1.14826e-05	0.00128432	2.89133
ENSMUSG00000042529	476.925	-0.443682	0.101624	-4.36591	1.26592e-05	0.00140773	2.85148
ENSMUSG00000035270	71.2935	-0.766828	0.175879	-4.35997	1.30079e-05	0.00142998	2.84467
ENSMUSG00000079055	1464.83	0.25106	0.0575814	4.36008	1.30013e-05	0.00142998	2.84467
ENSMUSG00000029090	981.02	-0.281872	0.0647021	-4.35645	1.32189e-05	0.00143827	2.84216
ENSMUSG00000029826	387.493	0.418431	0.0960537	4.35622	1.32329e-05	0.00143827	2.84216
ENSMUSG00000072966	3538.26	0.250314	0.0575092	4.3526	1.34532e-05	0.001454	2.83744
ENSMUSG00000024887	1166.23	0.377772	0.0869749	4.34346	1.40256e-05	0.0015074	2.82177
ENSMUSG00000000957	345.552	-0.358352	0.0830093	-4.31702	1.58153e-05	0.0016903	2.77204
ENSMUSG00000002393	402.355	-0.521329	0.120823	-4.31483	1.59727e-05	0.0016977	2.77014
ENSMUSG00000075014	90.6656	0.73596	0.170742	4.31037	1.62981e-05	0.00172276	2.76378
ENSMUSG00000024647	2298.03	-0.320294	0.0747128	-4.28701	1.81097e-05	0.00185316	2.73209
ENSMUSG00000028364	146.569	-0.598012	0.139415	-4.28945	1.79119e-05	0.00185316	2.73209
ENSMUSG00000029084	122.416	-0.590995	0.137793	-4.28899	1.79485e-05	0.00185316	2.73209
ENSMUSG00000049928	111.409	0.71555	0.16675	4.29115	1.77748e-05	0.00185316	2.73209
ENSMUSG00000058571	916.891	-0.516398	0.120427	-4.28805	1.80248e-05	0.00185316	2.73209
ENSMUSG00000080058	61.3983	-1.10575	0.257882	-4.28781	1.80445e-05	0.00185316	2.73209
ENSMUSG00000051527	2977.72	0.240983	0.0562461	4.28444	1.832e-05	0.00186476	2.72938
ENSMUSG00000033191	323.624	-0.510922	0.119457	-4.27702	1.89411e-05	0.0019139	2.71808
ENSMUSG00000051703	1368.99	-0.345936	0.0809125	-4.27544	1.90761e-05	0.0019139	2.71808
ENSMUSG00000113920	15.8183	1.54793	0.362076	4.27515	1.91012e-05	0.0019139	2.71808
ENSMUSG00000009551	83.1073	0.759154	0.17787	4.26804	1.97202e-05	0.00194786	2.71044
ENSMUSG00000031494	24.847	1.41961	0.332578	4.26851	1.96782e-05	0.00194786	2.71044
ENSMUSG00000051149	119.611	-0.846755	0.198407	-4.26777	1.97439e-05	0.00194786	2.71044
ENSMUSG00000034265	1278.89	-0.410703	0.0962981	-4.26491	1.9998e-05	0.00196287	2.70711
ENSMUSG00000056481	117.759	-0.681104	0.15997	-4.25771	2.06529e-05	0.00201685	2.69533
ENSMUSG00000033740	364.241	0.532298	0.125087	4.25541	2.08663e-05	0.00202741	2.69306
ENSMUSG00000040867	3186.57	-0.230999	0.0545675	-4.23327	2.30315e-05	0.00222653	2.65237
ENSMUSG00000002763	1098.48	-0.249739	0.0590165	-4.23169	2.31945e-05	0.00223108	2.65149
ENSMUSG00000051550	479.942	-0.419369	0.0992254	-4.22643	2.37429e-05	0.00227246	2.6435
ENSMUSG00000028860	47.3143	0.956646	0.226661	4.2206	2.43649e-05	0.00232046	2.63443
ENSMUSG00000064225	5151.03	-0.174726	0.0414304	-4.21734	2.47201e-05	0.00234268	2.63029
ENSMUSG00000021585	985.479	0.33562	0.0798832	4.20138	2.6529e-05	0.00249623	2.60272
ENSMUSG00000055172	211.964	0.545755	0.129917	4.20078	2.65998e-05	0.00249623	2.60272
ENSMUSG00000041020	7105.57	0.252622	0.0603773	4.18405	2.86356e-05	0.00267423	2.5728
ENSMUSG00000051652	434.816	-0.362901	0.087009	-4.17084	3.03475e-05	0.00282041	2.54969
ENSMUSG00000029675	237.303	-0.590939	0.141805	-4.16726	3.08287e-05	0.00285136	2.54495
ENSMUSG00000022208	11452	-0.229135	0.0553293	-4.14129	3.45352e-05	0.00317889	2.49772
ENSMUSG00000017417	1477.78	0.273155	0.065979	4.14002	3.4727e-05	0.00318132	2.49739
ENSMUSG00000025422	32746.9	-0.298508	0.0724858	-4.11816	3.81908e-05	0.00348206	2.45816
ENSMUSG00000032125	247.078	-0.451863	0.109846	-4.1136	3.89536e-05	0.00353486	2.45163
ENSMUSG00000052848	218.797	-0.450513	0.109901	-4.09925	4.14496e-05	0.0037437	2.4267
ENSMUSG00000100210	219.417	-0.898774	0.219566	-4.0934	4.25086e-05	0.0038214	2.41778
ENSMUSG00000002289	50.2423	-1.21102	0.296432	-4.08532	4.40167e-05	0.00393858	2.40466
ENSMUSG00000019194	12534.2	0.209531	0.0514004	4.07644	4.57295e-05	0.00403552	2.3941
ENSMUSG00000041926	1104.52	-0.33706	0.0826658	-4.07738	4.55459e-05	0.00403552	2.3941
ENSMUSG00000070858	179.681	-0.752365	0.184523	-4.07734	4.55537e-05	0.00403552	2.3941
ENSMUSG00000037469	36.9796	1.18479	0.291179	4.06892	4.72319e-05	0.00414775	2.38219
ENSMUSG00000059187	1945.94	-0.339829	0.0835386	-4.06793	4.74324e-05	0.00414775	2.38219
ENSMUSG00000016763	3401.48	-0.487897	0.120024	-4.06499	4.80343e-05	0.00418138	2.37868
ENSMUSG00000026020	2259.77	0.199439	0.0490942	4.06238	4.85756e-05	0.00420945	2.37577
ENSMUSG00000042035	1179.49	-0.298308	0.0734807	-4.05967	4.91418e-05	0.00422049	2.37464
ENSMUSG00000064264	513.682	-0.400037	0.0985175	-4.06057	4.89525e-05	0.00422049	2.37464
ENSMUSG00000016487	1816.93	-0.287584	0.0708676	-4.05805	4.94849e-05	0.00423107	2.37355
ENSMUSG00000021130	4288.18	0.216768	0.053493	4.05228	5.07207e-05	0.00431755	2.36476
ENSMUSG00000075585	1217.42	-0.290372	0.072001	-4.03289	5.50949e-05	0.00464875	2.33266
ENSMUSG00000105565	38.5429	-0.997528	0.247288	-4.03387	5.48659e-05	0.00464875	2.33266
ENSMUSG00000116180	274.914	0.370607	0.0919327	4.03129	5.54719e-05	0.00466013	2.3316
ENSMUSG00000050295	396.116	-0.43829	0.108847	-4.02666	5.65737e-05	0.00472219	2.32586
ENSMUSG00000106847	17332.3	0.14619	0.0363102	4.02613	5.67016e-05	0.00472219	2.32586
ENSMUSG00000044042	6561.61	0.260729	0.0649046	4.01711	5.89151e-05	0.00488538	2.3111
ENSMUSG00000019768	88.8513	-0.704985	0.175563	-4.01558	5.9301e-05	0.00489628	2.31013
ENSMUSG00000047632	163.157	-0.496352	0.123815	-4.00883	6.10213e-05	0.00498452	2.30238
ENSMUSG00000066721	323.847	-0.461078	0.115011	-4.00899	6.09782e-05	0.00498452	2.30238
ENSMUSG00000113294	21.5039	-1.25786	0.313811	-4.00834	6.1147e-05	0.00498452	2.30238
ENSMUSG00000036422	727.172	-0.44882	0.112076	-4.00459	6.21244e-05	0.00504283	2.29733
ENSMUSG00000019889	6395.18	-0.218336	0.0545558	-4.00207	6.27904e-05	0.00507547	2.29452
ENSMUSG00000105011	111.307	-0.708073	0.177727	-3.98404	6.77543e-05	0.0054538	2.2633
ENSMUSG00000036155	8712.94	-0.183991	0.046237	-3.9793	6.9118e-05	0.00554038	2.25646
ENSMUSG00000010175	1054.08	0.30069	0.0756178	3.97644	6.99538e-05	0.00554644	2.25599
ENSMUSG00000021280	54.2654	0.764897	0.192337	3.97686	6.98314e-05	0.00554644	2.25599
ENSMUSG00000070348	2036.03	-0.326442	0.0821012	-3.97609	7.00584e-05	0.00554644	2.25599
ENSMUSG00000029581	6382.02	-0.327377	0.0824281	-3.97167	7.1371e-05	0.00562719	2.24971
ENSMUSG00000020990	664.855	0.352538	0.0890177	3.96031	7.48526e-05	0.00587761	2.2308
ENSMUSG00000039904	1486.28	0.498742	0.125995	3.95842	7.54481e-05	0.00590028	2.22913
ENSMUSG00000064994	114.496	0.741068	0.187578	3.95071	7.79185e-05	0.00606881	2.2169
ENSMUSG00000040152	247.168	0.858531	0.217613	3.94521	7.97287e-05	0.00618476	2.20868
ENSMUSG00000054871	508.553	-0.406089	0.10296	-3.94414	8.00864e-05	0.00618756	2.20848
ENSMUSG00000025128	1057.49	-0.413264	0.10486	-3.9411	8.11088e-05	0.00622088	2.20615
ENSMUSG00000027339	3203.53	0.179703	0.04561	3.93998	8.14878e-05	0.00622088	2.20615
ENSMUSG00000042286	851.023	-0.422169	0.107141	-3.94031	8.13754e-05	0.00622088	2.20615
ENSMUSG00000116081	592.228	-0.451768	0.114757	-3.93673	8.25992e-05	0.0062808	2.20198
ENSMUSG00000074576	242.075	-0.464074	0.118045	-3.93132	8.44792e-05	0.00639846	2.19392
ENSMUSG00000031790	557.388	-0.352064	0.0895998	-3.9293	8.51944e-05	0.00640314	2.19361
ENSMUSG00000064215	382.462	0.427218	0.108727	3.92926	8.52065e-05	0.00640314	2.19361
ENSMUSG00000107677	101.507	0.818944	0.20853	3.92722	8.59347e-05	0.00643273	2.1916
ENSMUSG00000029661	873.643	-0.742423	0.189228	-3.92343	8.7298e-05	0.00650857	2.18651
ENSMUSG00000035606	167.35	-0.580329	0.147948	-3.92253	8.76245e-05	0.00650857	2.18651
ENSMUSG00000040563	4064.95	-0.205021	0.0523077	-3.91952	8.87249e-05	0.00656496	2.18277
ENSMUSG00000027750	91.7501	-0.847758	0.216467	-3.91634	8.99038e-05	0.0066267	2.1787
ENSMUSG00000006342	394.304	0.489186	0.124968	3.91448	9.05991e-05	0.00665246	2.17702
ENSMUSG00000002111	70.0975	-0.646189	0.165254	-3.91027	9.21931e-05	0.00671823	2.17275
ENSMUSG00000030513	574.476	0.364187	0.0931259	3.9107	9.20307e-05	0.00671823	2.17275
ENSMUSG00000034974	853.317	-0.251714	0.0644048	-3.90831	9.2945e-05	0.00672209	2.1725
ENSMUSG00000086841	219.377	0.513508	0.131383	3.90849	9.28733e-05	0.00672209	2.1725
ENSMUSG00000029419	3512.55	-0.334626	0.0856413	-3.9073	9.33339e-05	0.00672494	2.17231
ENSMUSG00000042284	985.325	-0.358876	0.0919788	-3.90172	9.55123e-05	0.00685621	2.16392
ENSMUSG00000114433	32.2232	-0.909772	0.233285	-3.89982	9.62626e-05	0.00688438	2.16213
ENSMUSG00000020087	333.94	-0.318679	0.0817402	-3.89869	9.67162e-05	0.00689121	2.1617
ENSMUSG00000002012	753.577	0.385244	0.0989727	3.89243	9.92461e-05	0.00704538	2.1521
ENSMUSG00000026814	693.939	-0.43333	0.111523	-3.88557	0.00010209	0.00722058	2.14143
ENSMUSG00000028753	224.255	-0.466821	0.120461	-3.87527	0.000106505	0.00739688	2.13095
ENSMUSG00000032911	981.235	-0.359974	0.0928131	-3.87848	0.00010511	0.00739688	2.13095
ENSMUSG00000076612	149.852	0.77707	0.200506	3.87554	0.000106387	0.00739688	2.13095
ENSMUSG00000091636	204.739	0.426424	0.109969	3.87768	0.000105458	0.00739688	2.13095
ENSMUSG00000116557	167.303	-0.829522	0.214038	-3.87559	0.000106366	0.00739688	2.13095
ENSMUSG00000026888	657.669	-0.295549	0.0763327	-3.87186	0.00010801	0.00747444	2.12642
ENSMUSG00000086003	60.8079	0.618336	0.160088	3.86247	0.000112245	0.00773966	2.11128
ENSMUSG00000028176	16159.9	-0.152808	0.0395767	-3.86106	0.000112896	0.00775676	2.11032
ENSMUSG00000034151	41.9938	-0.791724	0.20516	-3.85906	0.000113822	0.00779256	2.10832
ENSMUSG00000031807	320.463	-0.383358	0.0994703	-3.85399	0.000116206	0.00792756	2.10086
ENSMUSG00000034412	567.13	-0.285809	0.0741867	-3.85256	0.000116887	0.00794583	2.09986
ENSMUSG00000028174	112.057	0.774336	0.201174	3.84909	0.000118556	0.00800274	2.09676
ENSMUSG00000040097	10779.9	0.187932	0.0488151	3.84988	0.000118177	0.00800274	2.09676
ENSMUSG00000092094	167.043	0.474949	0.123547	3.84428	0.000120907	0.00813287	2.08976
ENSMUSG00000029163	86.8841	-0.52369	0.136354	-3.84066	0.000122704	0.00822503	2.08486
ENSMUSG00000021466	3594.39	0.165332	0.0430703	3.83865	0.000123715	0.00826399	2.08281
ENSMUSG00000031983	1339.45	0.289259	0.0753905	3.83681	0.000124642	0.00829713	2.08107
ENSMUSG00000032036	1637.48	-0.216986	0.0565731	-3.8355	0.000125309	0.00831271	2.08026
ENSMUSG00000036264	3087.05	-0.467884	0.12202	-3.8345	0.000125822	0.00831272	2.08026
ENSMUSG00000038128	6562.84	-0.168263	0.0438989	-3.83297	0.000126605	0.00831272	2.08026
ENSMUSG00000042369	895.278	-0.224661	0.0586049	-3.83348	0.000126342	0.00831272	2.08026
ENSMUSG00000058056	309.762	-0.433328	0.113196	-3.82812	0.000129126	0.00842078	2.07465
ENSMUSG00000063804	490.057	0.442007	0.115442	3.82881	0.000128766	0.00842078	2.07465
ENSMUSG00000022483	31.929	1.02111	0.267392	3.81877	0.000134116	0.0086625	2.06236
ENSMUSG00000029554	407.86	0.328566	0.0860424	3.81865	0.000134184	0.0086625	2.06236
ENSMUSG00000046229	263.861	-1.29974	0.340226	-3.82022	0.00013333	0.0086625	2.06236
ENSMUSG00000010825	345.888	0.657609	0.172362	3.81528	0.00013603	0.00875232	2.05788
ENSMUSG00000033249	548.426	0.298866	0.078364	3.81381	0.000136841	0.00877514	2.05675
ENSMUSG00000072663	44.6437	0.711435	0.186603	3.81256	0.000137532	0.00879019	2.056
ENSMUSG00000031273	82.2682	-0.573773	0.150536	-3.81154	0.000138106	0.00879762	2.05563
ENSMUSG00000040495	832.532	0.343922	0.0903453	3.80675	0.000140803	0.00893982	2.04867
ENSMUSG00000097797	120.016	-0.671764	0.176559	-3.80475	0.000141949	0.00898292	2.04658
ENSMUSG00000029471	14833.3	-0.193603	0.0509534	-3.79962	0.000144919	0.00911098	2.04044
ENSMUSG00000099583	125.35	-0.701894	0.184696	-3.80028	0.000144535	0.00911098	2.04044
ENSMUSG00000024513	1448.41	0.222575	0.0587443	3.78888	0.000151326	0.00945201	2.02448
ENSMUSG00000032338	138.115	-0.454145	0.119852	-3.78922	0.000151118	0.00945201	2.02448
ENSMUSG00000040717	228.329	-0.358027	0.0947046	-3.78046	0.000156538	0.00974589	2.01118
ENSMUSG00000050822	104.117	-0.785401	0.208087	-3.77439	0.0001604	0.00995413	2.002
ENSMUSG00000074505	26350.1	-0.208236	0.05523	-3.77035	0.000163018	0.0100841	1.99636
ENSMUSG00000027004	711.669	-0.379675	0.100754	-3.76834	0.000164336	0.0101148	1.99504
ENSMUSG00000050910	1221.51	0.214799	0.0570063	3.76799	0.000164566	0.0101148	1.99504
ENSMUSG00000033460	2680.73	0.273647	0.0726476	3.76677	0.000165374	0.0101321	1.9943
ENSMUSG00000029076	9208.47	0.202046	0.0537142	3.76149	0.000168902	0.0102392	1.98973
ENSMUSG00000047996	447.511	0.451508	0.120012	3.76219	0.00016843	0.0102392	1.98973
ENSMUSG00000048583	75.2501	-0.727059	0.193317	-3.76098	0.000169252	0.0102392	1.98973
ENSMUSG00000056394	311.968	0.362696	0.0964091	3.76205	0.000168525	0.0102392	1.98973
ENSMUSG00000030739	899.758	0.312667	0.0831749	3.75915	0.000170491	0.0102818	1.98793
ENSMUSG00000020681	726.338	0.401163	0.106755	3.75777	0.000171434	0.0103064	1.98689
ENSMUSG00000006411	202.874	0.424739	0.113253	3.75037	0.000176576	0.0105534	1.97661
ENSMUSG00000021047	4553.37	0.292879	0.0780953	3.75028	0.00017664	0.0105534	1.97661
ENSMUSG00000033965	1389.5	-0.215373	0.0574525	-3.74872	0.000177742	0.0105864	1.97525
ENSMUSG00000029098	1544.4	0.229109	0.0611825	3.74469	0.000180619	0.0107245	1.96962
ENSMUSG00000015468	236.127	-0.690985	0.184646	-3.74221	0.000182411	0.0107976	1.96667
ENSMUSG00000026994	79.1212	-0.623878	0.16686	-3.73893	0.000184803	0.0108392	1.965
ENSMUSG00000097178	26.7536	-1.43969	0.385034	-3.73914	0.000184654	0.0108392	1.965
ENSMUSG00000102543	5877.28	-0.258025	0.0689955	-3.73974	0.000184209	0.0108392	1.965
ENSMUSG00000050705	1161.16	-0.216111	0.0578447	-3.73605	0.000186933	0.0109308	1.96135
ENSMUSG00000027015	48.0144	-0.704253	0.188645	-3.73323	0.000189041	0.0110205	1.9578
ENSMUSG00000000305	919.503	-0.403267	0.108082	-3.73113	0.000190623	0.0110458	1.9568
ENSMUSG00000074749	647.087	0.318006	0.0852249	3.73137	0.000190441	0.0110458	1.9568
ENSMUSG00000040265	13260	0.148685	0.039866	3.72961	0.000191775	0.0110792	1.95549
ENSMUSG00000063430	2051.68	-0.292725	0.0785331	-3.72741	0.000193461	0.0111431	1.95299
ENSMUSG00000078794	4929.48	-0.278985	0.0749408	-3.72274	0.00019707	0.0112919	1.94723
ENSMUSG00000100303	276.903	-0.402859	0.108221	-3.72255	0.000197217	0.0112919	1.94723
ENSMUSG00000021340	1357.6	0.239976	0.0645488	3.71775	0.000201005	0.0114717	1.94037
ENSMUSG00000026072	316.829	-0.685263	0.184356	-3.71707	0.00020155	0.0114717	1.94037
ENSMUSG00000036620	1156.41	-0.254604	0.0685629	-3.71343	0.000204468	0.0116034	1.93541
ENSMUSG00000038370	2166.85	0.356399	0.0959953	3.71267	0.000205088	0.0116044	1.93538
ENSMUSG00000048029	110.555	0.485036	0.130802	3.70818	0.000208753	0.0117771	1.92896
ENSMUSG00000026822	108.972	-4.71427	1.27164	-3.70724	0.000209529	0.0117863	1.92862
ENSMUSG00000037822	4556.12	0.178972	0.0482881	3.70635	0.00021027	0.0117935	1.92836
ENSMUSG00000040929	4275.44	-0.251886	0.06802	-3.70312	0.000212968	0.0119101	1.92409
ENSMUSG00000020734	1267.02	-0.343806	0.0929786	-3.69769	0.000217569	0.0120971	1.91732
ENSMUSG00000034282	142.821	0.565878	0.153032	3.69778	0.000217495	0.0120971	1.91732
ENSMUSG00000032280	1979.58	-0.298357	0.0807328	-3.69561	0.00021936	0.0121615	1.91501
ENSMUSG00000045777	384.745	0.280519	0.0759806	3.69198	0.000222518	0.0123012	1.91005
ENSMUSG00000091896	2960.53	-0.226789	0.0615121	-3.6869	0.000227001	0.0124773	1.90388
ENSMUSG00000110649	82.6139	0.570227	0.15466	3.68696	0.000226949	0.0124773	1.90388
ENSMUSG00000039126	5567.72	0.331364	0.0899917	3.68217	0.000231258	0.0126751	1.89705
ENSMUSG00000095562	43.5381	-2.30882	0.627156	-3.68141	0.000231945	0.0126766	1.897
ENSMUSG00000039089	1635.22	-0.262012	0.0712442	-3.67766	0.00023538	0.0128279	1.89185
ENSMUSG00000021180	1404.94	0.323213	0.0879925	3.67318	0.000239549	0.0130182	1.88545
ENSMUSG00000055333	63.0302	-0.668462	0.182232	-3.6682	0.000244266	0.0132372	1.87821
ENSMUSG00000041740	6974.21	-0.172968	0.0471628	-3.66746	0.000244967	0.0132379	1.87818
ENSMUSG00000002900	455.086	-0.32881	0.0896848	-3.66629	0.0002461	0.0132618	1.8774
ENSMUSG00000031137	4178.18	-0.173298	0.047307	-3.66325	0.000249031	0.0133823	1.87347
ENSMUSG00000046607	713.321	-0.47164	0.128913	-3.65859	0.000253603	0.01359	1.86678
ENSMUSG00000004894	281.705	0.499442	0.136597	3.65632	0.000255861	0.013635	1.86534
ENSMUSG00000097431	2051.93	0.268323	0.0733747	3.65688	0.0002553	0.013635	1.86534
ENSMUSG00000101355	36.7117	-2.26754	0.620574	-3.65394	0.000258249	0.0137243	1.86251
ENSMUSG00000027227	548.199	0.30548	0.0837272	3.64852	0.000263757	0.0139784	1.85454
ENSMUSG00000105891	140.503	0.662123	0.18156	3.64684	0.000265481	0.0140311	1.85291
ENSMUSG00000100837	49.9792	0.662134	0.181706	3.64398	0.000268459	0.0141496	1.84926
ENSMUSG00000032735	1380.54	0.221317	0.0607768	3.64147	0.000271086	0.0142491	1.84621
ENSMUSG00000004187	14220.2	0.158716	0.0437626	3.62674	0.000287021	0.0150455	1.82259
ENSMUSG00000026170	119.258	0.4412	0.121852	3.62078	0.000293712	0.0153544	1.81377
ENSMUSG00000033295	3206.93	-0.288534	0.0797679	-3.61716	0.000297849	0.0155285	1.80887
ENSMUSG00000004317	856.885	0.288428	0.0798333	3.61288	0.000302817	0.0157449	1.80286
ENSMUSG00000058881	896.132	0.229157	0.0634564	3.61125	0.00030473	0.0158016	1.8013
ENSMUSG00000053166	1579.99	-0.424807	0.117765	-3.60724	0.000309477	0.0160046	1.79575
ENSMUSG00000039457	34.6626	0.952542	0.264185	3.60559	0.000311439	0.0160629	1.79418
ENSMUSG00000021400	1621.45	-0.19082	0.0529393	-3.60451	0.000312741	0.0160869	1.79353
ENSMUSG00000019806	2030.06	0.205254	0.0569846	3.60192	0.000315875	0.0161617	1.79151
ENSMUSG00000049532	2259.02	0.26002	0.0721881	3.60198	0.000315806	0.0161617	1.79151
ENSMUSG00000020593	1509.14	0.213097	0.0591968	3.59981	0.000318452	0.0161824	1.79096
ENSMUSG00000022416	8595.18	-0.326832	0.0907797	-3.60028	0.000317874	0.0161824	1.79096
ENSMUSG00000028631	385.378	0.354462	0.0984749	3.59952	0.000318803	0.0161824	1.79096
ENSMUSG00000027001	498.972	-0.272392	0.0757735	-3.59482	0.000324622	0.0163465	1.78657
ENSMUSG00000028756	10041.1	0.266633	0.0741809	3.59436	0.000325188	0.0163465	1.78657
ENSMUSG00000031558	3583.52	-0.252625	0.0702735	-3.59488	0.000324543	0.0163465	1.78657
ENSMUSG00000050064	1906.33	-0.208748	0.0580906	-3.59348	0.000326284	0.0163465	1.78657
ENSMUSG00000099342	28.1429	-3.2484	0.90382	-3.59407	0.000325547	0.0163465	1.78657
ENSMUSG00000039059	2143.88	0.283861	0.0790848	3.58933	0.000331532	0.0165663	1.78078
ENSMUSG00000051435	179.79	0.441804	0.123139	3.58786	0.000333405	0.0166167	1.77945
ENSMUSG00000044345	374.27	-0.337884	0.0942286	-3.58579	0.000336063	0.0166285	1.77915
ENSMUSG00000068739	4638.92	0.221336	0.0617283	3.58565	0.000336235	0.0166285	1.77915
ENSMUSG00000095407	672.341	-0.365731	0.101963	-3.58689	0.000334645	0.0166285	1.77915
ENSMUSG00000097604	212.266	-0.483976	0.135137	-3.58137	0.000341801	0.0168605	1.77313
ENSMUSG00000005447	198.62	0.369465	0.103299	3.57664	0.000348038	0.017037	1.76861
ENSMUSG00000041037	4915.53	-0.182007	0.0508713	-3.57779	0.000346513	0.017037	1.76861
ENSMUSG00000059361	1450.09	0.415509	0.116166	3.57685	0.000347764	0.017037	1.76861
ENSMUSG00000027435	603.074	-0.590764	0.165404	-3.57164	0.000354754	0.0172779	1.76251
ENSMUSG00000036644	6747.88	0.162097	0.045378	3.57216	0.000354054	0.0172779	1.76251
ENSMUSG00000034341	10480.3	0.258029	0.0722896	3.56937	0.000357834	0.0173839	1.75985
ENSMUSG00000014602	72819.6	0.154592	0.0433402	3.56694	0.000361175	0.017502	1.75691
ENSMUSG00000025237	4889.72	-0.128944	0.0361624	-3.5657	0.000362885	0.0175124	1.75665
ENSMUSG00000030701	6077.95	0.384202	0.107757	3.56547	0.00036321	0.0175124	1.75665
ENSMUSG00000021577	11124.9	0.215469	0.060499	3.56153	0.000368704	0.0177328	1.75122
ENSMUSG00000059003	38732.2	-0.179395	0.0504964	-3.55263	0.000381396	0.0182975	1.73761
ENSMUSG00000037196	285.626	0.310949	0.0876361	3.54819	0.00038789	0.0185628	1.73136
ENSMUSG00000027827	3670.79	0.267416	0.0754325	3.5451	0.000392457	0.0187347	1.72735
ENSMUSG00000032705	4301.9	-0.251397	0.0709407	-3.54377	0.000394453	0.0187834	1.72623
ENSMUSG00000038060	138.906	-0.573821	0.161964	-3.5429	0.000395759	0.018799	1.72586
ENSMUSG00000026193	4342.6	-0.416724	0.117662	-3.54172	0.000397531	0.0188367	1.725
ENSMUSG00000031409	1158.08	0.308109	0.0871168	3.53673	0.000405108	0.0191486	1.71786
ENSMUSG00000063445	208.273	0.402923	0.114012	3.53405	0.000409242	0.0192966	1.71452
ENSMUSG00000002265	29641	0.179761	0.0509113	3.53086	0.000414203	0.0194459	1.71117
ENSMUSG00000036256	455.285	-0.513505	0.145443	-3.53063	0.000414571	0.0194459	1.71117
ENSMUSG00000070601	549.865	-0.470934	0.133406	-3.53008	0.000415441	0.0194459	1.71117
ENSMUSG00000039050	2128.55	0.156188	0.0442548	3.52929	0.000416681	0.0194566	1.71093
ENSMUSG00000037541	16333.2	-0.385845	0.109402	-3.52684	0.000420546	0.0195895	1.70798
ENSMUSG00000113555	84.6667	0.646136	0.18335	3.52405	0.000425003	0.0197493	1.70445
ENSMUSG00000057554	921.934	0.228019	0.0647411	3.52201	0.000428284	0.0198538	1.70216
ENSMUSG00000041923	6333.61	-0.231899	0.0659497	-3.5163	0.000437602	0.0201885	1.6949
ENSMUSG00000109121	266.893	-0.396218	0.112667	-3.51672	0.000436908	0.0201885	1.6949
ENSMUSG00000025856	967.298	-0.195834	0.0557655	-3.51174	0.000445187	0.0204804	1.68866
ENSMUSG00000044783	2277.25	0.233051	0.0663731	3.51122	0.000446059	0.0204804	1.68866
ENSMUSG00000051726	4516.93	-0.191059	0.0544316	-3.51007	0.000447989	0.02052	1.68782
ENSMUSG00000060032	475.39	-0.29611	0.0844155	-3.50776	0.000451892	0.0206497	1.68509
ENSMUSG00000039988	4744.9	-0.139836	0.0398888	-3.50564	0.000455517	0.020766	1.68265
ENSMUSG00000029404	455.535	0.341958	0.0976401	3.50223	0.000461386	0.020983	1.67813
ENSMUSG00000030678	3661.91	-0.162989	0.0465469	-3.50161	0.000462459	0.020983	1.67813
ENSMUSG00000032128	1734.75	-0.937187	0.267921	-3.498	0.000468768	0.0212192	1.67327
ENSMUSG00000028630	3114.88	-0.16323	0.0466947	-3.49569	0.00047283	0.0213528	1.67054
ENSMUSG00000028475	62.3603	-0.774956	0.221792	-3.49407	0.000475716	0.0214329	1.66892
ENSMUSG00000023266	511.748	0.272509	0.0780395	3.49194	0.000479533	0.0215543	1.66647
ENSMUSG00000001506	718.264	-1.24416	0.356392	-3.491	0.000481224	0.0215799	1.66595
ENSMUSG00000050944	332.517	-0.364595	0.104559	-3.48696	0.000488537	0.0218569	1.66041
ENSMUSG00000013629	681.341	-0.311473	0.0893712	-3.48516	0.00049185	0.0219541	1.65848
ENSMUSG00000021065	2813.6	-0.187616	0.0538981	-3.48095	0.000499647	0.0222505	1.65266
ENSMUSG00000050423	202.254	-0.414958	0.119373	-3.47614	0.000508696	0.0226011	1.64587
ENSMUSG00000061607	1075.51	0.195277	0.056187	3.47548	0.000509931	0.0226038	1.64582
ENSMUSG00000112280	1621.49	0.20937	0.0602606	3.4744	0.000511999	0.0226433	1.64506
ENSMUSG00000020357	158.746	-0.557506	0.160631	-3.47073	0.000519045	0.0227794	1.64246
ENSMUSG00000039830	561.902	-0.295945	0.0852623	-3.471	0.000518523	0.0227794	1.64246
ENSMUSG00000052613	2118.89	-0.247006	0.0711764	-3.47033	0.000519814	0.0227794	1.64246
ENSMUSG00000082229	4952.38	0.312311	0.0899478	3.47213	0.000516338	0.0227794	1.64246
ENSMUSG00000025213	198.89	0.479525	0.138251	3.46851	0.000523349	0.0228822	1.6405
ENSMUSG00000022836	889.846	-0.313889	0.0906249	-3.4636	0.000532994	0.0231985	1.63454
ENSMUSG00000055540	2882.37	-0.236558	0.0682959	-3.46372	0.000532755	0.0231985	1.63454
ENSMUSG00000036006	2836.1	-0.189066	0.054603	-3.46255	0.000535077	0.0232276	1.634
ENSMUSG00000093536	466.451	0.334888	0.096731	3.46205	0.000536078	0.0232276	1.634
ENSMUSG00000021375	1453.07	0.259581	0.0750103	3.4606	0.000538966	0.0233003	1.63264
ENSMUSG00000027220	10063.1	-0.230354	0.0665927	-3.45915	0.000541889	0.0233204	1.63226
ENSMUSG00000028394	485.553	0.35475	0.102569	3.45865	0.000542894	0.0233204	1.63226
ENSMUSG00000117864	164.385	0.583695	0.168768	3.45856	0.000543067	0.0233204	1.63226
ENSMUSG00000039328	112.858	-0.65212	0.188716	-3.45556	0.000549158	0.0235294	1.62839
ENSMUSG00000008398	317.47	-0.39335	0.113877	-3.45416	0.000552003	0.023565	1.62773
ENSMUSG00000020176	1811.57	0.279908	0.0810398	3.45395	0.000552438	0.023565	1.62773
ENSMUSG00000027536	19.4167	1.1677	0.338704	3.44756	0.000565676	0.0239702	1.62033
ENSMUSG00000040390	5259.14	-0.22495	0.0652331	-3.4484	0.000563921	0.0239702	1.62033
ENSMUSG00000053395	1897.74	-0.276861	0.0802956	-3.44802	0.000564713	0.0239702	1.62033
ENSMUSG00000022636	9377.27	-0.208321	0.0604485	-3.44625	0.000568421	0.0240336	1.61918
ENSMUSG00000034612	2109.1	-0.237535	0.0689936	-3.44285	0.000575612	0.0242843	1.61468
ENSMUSG00000026630	20.7098	1.00912	0.293275	3.44086	0.000579877	0.0244107	1.61242
ENSMUSG00000050315	360.092	-0.373991	0.108798	-3.43749	0.000587122	0.0246617	1.60798
ENSMUSG00000022096	2951.85	-0.333598	0.0971162	-3.43504	0.000592463	0.0248318	1.60499
ENSMUSG00000012443	65.835	-0.557342	0.162614	-3.4274	0.000609385	0.0254855	1.59371
ENSMUSG00000055027	40.9907	-0.756606	0.220981	-3.42385	0.0006174	0.0257647	1.58897
ENSMUSG00000037843	1315.28	-0.352584	0.103048	-3.42154	0.000622668	0.0259283	1.58623
ENSMUSG00000106139	92.0189	0.478824	0.140109	3.41752	0.000631944	0.0262578	1.58074
ENSMUSG00000070880	13549.1	0.249148	0.0729275	3.41638	0.000634585	0.0263107	1.57987
ENSMUSG00000026275	5173.23	0.251904	0.0738136	3.4127	0.000643217	0.0266112	1.57494
ENSMUSG00000037126	11770.3	-0.160651	0.0470939	-3.4113	0.000646545	0.0266915	1.57363
ENSMUSG00000025425	4302.35	-0.306957	0.0900363	-3.40926	0.000651386	0.0267764	1.57225
ENSMUSG00000107595	127.457	-0.548434	0.16084	-3.40981	0.000650073	0.0267764	1.57225
ENSMUSG00000027864	2978.36	-0.270882	0.0795508	-3.40514	0.000661297	0.0271258	1.56662
ENSMUSG00000037280	303.037	0.544285	0.159965	3.40252	0.000667663	0.0272129	1.56523
ENSMUSG00000057606	45.2079	-0.929597	0.273192	-3.40272	0.000667182	0.0272129	1.56523
ENSMUSG00000104507	47.4631	-0.670377	0.197021	-3.40256	0.00066758	0.0272129	1.56523
ENSMUSG00000015143	3534.55	-0.325976	0.0960293	-3.39454	0.000687432	0.0279595	1.55347
ENSMUSG00000025727	23.7427	0.939987	0.277247	3.39044	0.000697818	0.0282624	1.54879
ENSMUSG00000028914	1072.64	0.2412	0.0711294	3.391	0.000696369	0.0282624	1.54879
ENSMUSG00000028906	5010.54	0.213555	0.063008	3.38933	0.00070064	0.0282745	1.5486
ENSMUSG00000103472	882.356	0.368888	0.108843	3.38917	0.000701057	0.0282745	1.5486
ENSMUSG00000032500	1311.71	-0.293616	0.0866913	-3.38692	0.000706833	0.0284478	1.54595
ENSMUSG00000027221	7562.18	-0.215835	0.0637455	-3.38589	0.000709484	0.0284736	1.54556
ENSMUSG00000074737	126.097	-0.519163	0.153348	-3.38552	0.000710434	0.0284736	1.54556
ENSMUSG00000023911	131.154	0.524159	0.154997	3.38173	0.000720312	0.0287852	1.54083
ENSMUSG00000039474	2501.17	-0.317888	0.094011	-3.38139	0.000721201	0.0287852	1.54083
ENSMUSG00000020265	1803.55	0.270119	0.0800063	3.37623	0.000734873	0.0291601	1.53521
ENSMUSG00000036777	720.958	0.551943	0.163437	3.3771	0.000732533	0.0291601	1.53521
ENSMUSG00000039278	7780.29	-1.2306	0.364501	-3.37613	0.000735142	0.0291601	1.53521
ENSMUSG00000051331	7526.1	-0.323844	0.0959472	-3.37523	0.000737535	0.0291948	1.53469
ENSMUSG00000028701	2104.15	0.161758	0.0479458	3.37378	0.000741434	0.0292289	1.53419
ENSMUSG00000034206	166.195	-0.383588	0.113689	-3.374	0.000740843	0.0292289	1.53419
ENSMUSG00000022269	274.122	-0.423924	0.125705	-3.37236	0.000745278	0.0293204	1.53283
ENSMUSG00000073591	825.597	-0.232035	0.06882	-3.37162	0.00074727	0.0293387	1.53256
ENSMUSG00000039831	1857.13	-0.250664	0.0743604	-3.37093	0.000749151	0.0293527	1.53235
ENSMUSG00000033632	953.827	0.213833	0.0634823	3.36839	0.000756072	0.0295414	1.52957
ENSMUSG00000047910	1285.97	0.203732	0.0604899	3.36804	0.000757038	0.0295414	1.52957
ENSMUSG00000033781	2198.77	0.151522	0.0450141	3.3661	0.000762384	0.0296898	1.52739
ENSMUSG00000037428	8971.17	-0.365166	0.108554	-3.3639	0.000768497	0.0298674	1.5248
ENSMUSG00000056501	93.9792	-0.484872	0.144167	-3.36326	0.000770284	0.0298765	1.52467
ENSMUSG00000048120	714.076	-0.245275	0.0730758	-3.35644	0.000789518	0.0304995	1.51571
ENSMUSG00000056820	5650.8	-0.192666	0.0574005	-3.35653	0.000789267	0.0304995	1.51571
ENSMUSG00000027359	223.667	0.331337	0.0987953	3.35377	0.000797177	0.0307337	1.51239
ENSMUSG00000052911	1038.92	-0.239938	0.0715679	-3.3526	0.000800572	0.0308028	1.51141
ENSMUSG00000025226	339.211	-0.396895	0.118421	-3.35157	0.000803555	0.0308559	1.51066
ENSMUSG00000019846	790.466	-0.330027	0.0984913	-3.35082	0.000805716	0.0308772	1.51036
ENSMUSG00000026208	67.846	-0.541087	0.161563	-3.34907	0.000810829	0.0309683	1.50908
ENSMUSG00000029086	487.769	-0.297741	0.0889337	-3.34789	0.00081428	0.0309683	1.50908
ENSMUSG00000100954	96.2089	-0.437906	0.130779	-3.34845	0.00081266	0.0309683	1.50908
ENSMUSG00000112968	63.3638	0.807731	0.241272	3.34781	0.000814533	0.0309683	1.50908
ENSMUSG00000005882	1555.7	0.210174	0.0628052	3.34645	0.000818528	0.0310589	1.50781
ENSMUSG00000073147	892.65	-0.326079	0.0974789	-3.34512	0.000822461	0.0311467	1.50659
ENSMUSG00000029093	1906.6	-0.219716	0.0657074	-3.34385	0.000826234	0.0312281	1.50545
ENSMUSG00000078584	1493.7	-0.176295	0.0527892	-3.3396	0.000839001	0.0316484	1.49965
ENSMUSG00000020396	2222.14	0.37251	0.111665	3.33595	0.000850071	0.0319408	1.49565
ENSMUSG00000050138	365.558	-0.450787	0.135114	-3.33635	0.000848862	0.0319408	1.49565
ENSMUSG00000110249	3303.83	-0.181848	0.0545467	-3.3338	0.000856697	0.032127	1.49313
ENSMUSG00000112540	16.6572	-1.20425	0.361345	-3.3327	0.000860086	0.0321913	1.49226
ENSMUSG00000025586	2965.21	0.173838	0.0522124	3.32945	0.00087019	0.0325063	1.48803
ENSMUSG00000033356	99.3862	-0.449961	0.135281	-3.32612	0.000880652	0.0328333	1.48369
ENSMUSG00000105867	807.521	-0.379178	0.11404	-3.32496	0.000884322	0.0329064	1.48272
ENSMUSG00000031486	530.794	-0.421882	0.126971	-3.32267	0.000891617	0.0331138	1.47999
ENSMUSG00000026519	580.147	0.396826	0.119456	3.32195	0.000893905	0.0331348	1.47972
ENSMUSG00000086596	249.456	-0.350276	0.105523	-3.31945	0.000901964	0.0333692	1.47665
ENSMUSG00000086308	69.3877	-0.5753	0.173419	-3.3174	0.000908579	0.0335494	1.47432
ENSMUSG00000066129	5374.28	0.233958	0.0705822	3.31468	0.000917478	0.0338131	1.47092
ENSMUSG00000015709	15641.9	0.154133	0.0465398	3.31185	0.000926813	0.0340918	1.46735
ENSMUSG00000027253	2885.76	-0.246245	0.0744151	-3.30907	0.000936068	0.0342359	1.46552
ENSMUSG00000035860	51.0583	0.708243	0.21401	3.3094	0.00093497	0.0342359	1.46552
ENSMUSG00000063765	203.823	-0.430957	0.130199	-3.30999	0.000932996	0.0342359	1.46552
ENSMUSG00000028456	5411.9	-0.258943	0.0783418	-3.3053	0.000948755	0.0345953	1.46098
ENSMUSG00000056076	2660.24	-0.136604	0.0413316	-3.30508	0.000949492	0.0345953	1.46098
ENSMUSG00000030111	81.682	-0.728755	0.220885	-3.29926	0.000969402	0.035254	1.45279
ENSMUSG00000081683	57.3066	-0.700029	0.212212	-3.29873	0.000971235	0.035254	1.45279
ENSMUSG00000026322	75.5783	0.589348	0.178706	3.29787	0.000974201	0.0352951	1.45229
ENSMUSG00000041911	476.853	0.267021	0.0810027	3.29644	0.00097918	0.0353924	1.45109
ENSMUSG00000049538	143.368	-0.483659	0.146739	-3.29604	0.000980568	0.0353924	1.45109
ENSMUSG00000024805	2138.97	0.215332	0.0653673	3.29419	0.00098705	0.0355597	1.44904
ENSMUSG00000096847	7317.76	-0.200811	0.0610019	-3.29188	0.000995193	0.035786	1.44629
ENSMUSG00000037217	24433.6	-0.166156	0.0505053	-3.28987	0.00100233	0.0359755	1.44399
ENSMUSG00000066747	15.8115	-1.07082	0.325699	-3.28777	0.00100984	0.0361264	1.44218
ENSMUSG00000093803	672.563	-0.292712	0.0890338	-3.28765	0.00101029	0.0361264	1.44218
ENSMUSG00000055723	605.615	-0.283187	0.0863214	-3.28062	0.0010358	0.0369699	1.43215
ENSMUSG00000044122	49.0198	0.68791	0.209851	3.27809	0.00104513	0.0371651	1.42987
ENSMUSG00000021259	5350.27	-0.180235	0.0550138	-3.27618	0.00105223	0.0372639	1.42871
ENSMUSG00000025314	11894.2	-0.218023	0.0665388	-3.27663	0.00105054	0.0372639	1.42871
ENSMUSG00000025366	563.487	0.286188	0.0873648	3.27577	0.00105373	0.0372639	1.42871
ENSMUSG00000024423	11789.4	0.263015	0.0803515	3.2733	0.00106301	0.0374988	1.42598
ENSMUSG00000052688	50.0759	-0.719834	0.219933	-3.27296	0.00106427	0.0374988	1.42598
ENSMUSG00000040706	73.38	0.52387	0.160301	3.26804	0.00108294	0.0380176	1.42002
ENSMUSG00000094786	366.012	0.415691	0.127181	3.26849	0.00108124	0.0380176	1.42002
ENSMUSG00000027848	604.619	-0.291855	0.0893214	-3.26747	0.00108513	0.0380239	1.41994
ENSMUSG00000031534	499.666	0.331688	0.101563	3.26583	0.00109145	0.0380239	1.41994
ENSMUSG00000033949	199.201	0.372208	0.113973	3.26576	0.0010917	0.0380239	1.41994
ENSMUSG00000070705	542.609	-0.378844	0.115993	-3.2661	0.00109039	0.0380239	1.41994
ENSMUSG00000078853	235.109	0.403613	0.123602	3.26542	0.001093	0.0380239	1.41994
ENSMUSG00000024579	653.492	-0.230176	0.0706071	-3.25995	0.00111431	0.0386553	1.41279
ENSMUSG00000110020	145.229	-0.380309	0.116669	-3.25973	0.00111517	0.0386553	1.41279
ENSMUSG00000046791	324.261	-0.323763	0.0993887	-3.25755	0.0011238	0.0388581	1.41052
ENSMUSG00000109108	99.2465	-0.414369	0.127215	-3.25723	0.00112506	0.0388581	1.41052
ENSMUSG00000026399	267.648	-0.40604	0.124755	-3.2547	0.0011351	0.0391346	1.40744
ENSMUSG00000029162	186.365	0.334773	0.102887	3.25378	0.0011388	0.0391918	1.4068
ENSMUSG00000051537	936.989	0.265319	0.0815567	3.25318	0.0011412	0.0392044	1.40666
ENSMUSG00000028541	1951.62	-0.199538	0.0613722	-3.25127	0.0011489	0.0393282	1.4053
ENSMUSG00000085642	203.585	0.325278	0.100044	3.25134	0.00114861	0.0393282	1.4053
ENSMUSG00000029833	1660.69	-0.192983	0.0593769	-3.25013	0.00115354	0.0394171	1.40432
ENSMUSG00000028782	15314.6	-0.281263	0.0865758	-3.24875	0.00115914	0.0395382	1.40298
ENSMUSG00000007682	5514.85	-0.387732	0.119407	-3.24715	0.00116565	0.0396899	1.40132
ENSMUSG00000002396	541.263	-0.24751	0.0763453	-3.24199	0.001187	0.0397525	1.40064
ENSMUSG00000015112	118.26	0.409433	0.126221	3.24377	0.00117957	0.0397525	1.40064
ENSMUSG00000018830	545.237	-0.585071	0.180495	-3.24148	0.00118912	0.0397525	1.40064
ENSMUSG00000022187	16.7041	-1.02931	0.317429	-3.24264	0.00118427	0.0397525	1.40064
ENSMUSG00000024736	6237.69	-0.259909	0.0802191	-3.23998	0.00119537	0.0397525	1.40064
ENSMUSG00000029245	6024.65	-0.170903	0.0526935	-3.24335	0.00118134	0.0397525	1.40064
ENSMUSG00000029334	610.194	-0.40446	0.124809	-3.24063	0.00119264	0.0397525	1.40064
ENSMUSG00000029363	253.844	-0.284466	0.0877849	-3.24049	0.00119324	0.0397525	1.40064
ENSMUSG00000034675	7330.98	-0.236088	0.0727551	-3.24497	0.00117464	0.0397525	1.40064
ENSMUSG00000039621	7077.73	-0.29905	0.0922109	-3.24311	0.00118231	0.0397525	1.40064
ENSMUSG00000062252	40.9197	0.725088	0.223671	3.24176	0.00118795	0.0397525	1.40064
ENSMUSG00000070462	883.946	-0.226919	0.0699455	-3.24423	0.00117771	0.0397525	1.40064
ENSMUSG00000075307	15.7382	-1.12945	0.348623	-3.23973	0.00119642	0.0397525	1.40064
ENSMUSG00000098128	130.826	-0.412692	0.127272	-3.24259	0.00118447	0.0397525	1.40064
ENSMUSG00000031274	189.626	-0.452806	0.139814	-3.23863	0.00120107	0.0398382	1.3997
ENSMUSG00000020375	901.018	0.171312	0.0529415	3.23588	0.00121269	0.0399482	1.3985
ENSMUSG00000045087	309.836	0.339303	0.104844	3.23627	0.00121102	0.0399482	1.3985
ENSMUSG00000046806	150.341	-0.435435	0.134533	-3.23665	0.00120944	0.0399482	1.3985
ENSMUSG00000114278	47.8456	-0.821612	0.253818	-3.23701	0.00120787	0.0399482	1.3985
ENSMUSG00000042557	2043.96	0.182515	0.056421	3.23488	0.00121695	0.0400198	1.39772
ENSMUSG00000001229	2864.98	-0.199919	0.0618231	-3.23373	0.00122186	0.0400951	1.39691
ENSMUSG00000034164	84.9494	-0.581886	0.179963	-3.23337	0.0012234	0.0400951	1.39691
ENSMUSG00000045193	1315.71	0.319273	0.0989508	3.22658	0.00125278	0.040988	1.38734
ENSMUSG00000021709	5905.38	0.300782	0.0933675	3.22149	0.00127527	0.041653	1.38035
ENSMUSG00000033760	550.775	0.24111	0.0748794	3.21998	0.001282	0.0417847	1.37898
ENSMUSG00000046480	5711.57	0.420791	0.130716	3.21913	0.00128582	0.0417847	1.37898
ENSMUSG00000049630	2898.63	-0.231869	0.0720276	-3.21918	0.00128559	0.0417847	1.37898
ENSMUSG00000058655	8619.45	0.222576	0.0691546	3.21852	0.00128853	0.0418023	1.3788
ENSMUSG00000050105	71.5589	-0.711754	0.221202	-3.21767	0.00129237	0.0418563	1.37824
ENSMUSG00000034317	517.932	0.481932	0.149885	3.21535	0.00130287	0.0421254	1.37546
ENSMUSG00000020604	434.94	0.423136	0.131709	3.21265	0.00131518	0.042452	1.3721
ENSMUSG00000021916	691.828	-0.248979	0.0775319	-3.21131	0.00132132	0.0425789	1.37081
ENSMUSG00000048799	2353.64	0.165395	0.0515337	3.20945	0.00132988	0.0427181	1.36939
ENSMUSG00000061171	91.9918	-0.521601	0.162522	-3.20941	0.00133008	0.0427181	1.36939
ENSMUSG00000000202	331.908	-0.265226	0.0826651	-3.20844	0.00133456	0.0427193	1.36938
ENSMUSG00000026676	266.951	-0.452046	0.140892	-3.20847	0.00133443	0.0427193	1.36938
ENSMUSG00000020530	3386.01	0.141387	0.0441235	3.20435	0.00135367	0.0432591	1.36392
ENSMUSG00000022012	1796.12	-0.293493	0.0916144	-3.20357	0.00135735	0.0432856	1.36366
ENSMUSG00000075316	49.3067	-0.905412	0.282657	-3.20322	0.001359	0.0432856	1.36366
ENSMUSG00000002546	3123.14	0.149811	0.0467783	3.20257	0.00136206	0.0433112	1.3634
ENSMUSG00000046215	493.778	-0.263886	0.0824892	-3.19903	0.0013789	0.0437022	1.3595
ENSMUSG00000053835	81.7831	-0.558965	0.174712	-3.19934	0.00137741	0.0437022	1.3595
ENSMUSG00000039809	20310.3	-0.138666	0.043372	-3.19713	0.00138803	0.0439193	1.35734
ENSMUSG00000037608	9355.3	0.161418	0.0505057	3.19604	0.0013933	0.0440136	1.35641
ENSMUSG00000026672	596.328	0.224129	0.0701437	3.19528	0.00139696	0.0440568	1.35599
ENSMUSG00000062209	9278.66	0.192783	0.0603543	3.19419	0.00140224	0.0441511	1.35506
ENSMUSG00000031937	314.529	0.255215	0.0799313	3.19292	0.0014084	0.0442002	1.35458
ENSMUSG00000057123	24.655	-0.958746	0.300257	-3.19308	0.00140765	0.0442002	1.35458
ENSMUSG00000015790	974.604	0.298027	0.093384	3.19142	0.00141578	0.0443555	1.35305
ENSMUSG00000104374	100.31	-0.605907	0.189882	-3.19097	0.00141796	0.0443555	1.35305
ENSMUSG00000035711	259.594	-0.667477	0.209333	-3.18859	0.00142968	0.0446495	1.35018
ENSMUSG00000114590	102.227	0.4251	0.133458	3.18527	0.0014462	0.0450923	1.3459
ENSMUSG00000060257	736.355	-0.253519	0.0796259	-3.18388	0.00145317	0.0452364	1.34451
ENSMUSG00000013523	3037.6	0.396112	0.124551	3.18031	0.00147116	0.0454288	1.34267
ENSMUSG00000019978	4956.38	-0.188752	0.0593316	-3.18131	0.00146612	0.0454288	1.34267
ENSMUSG00000024378	1582.42	0.339013	0.106562	3.18136	0.00146587	0.0454288	1.34267
ENSMUSG00000026655	250.246	-0.383044	0.120429	-3.18066	0.00146941	0.0454288	1.34267
ENSMUSG00000030600	2091.41	-0.229284	0.0720899	-3.18053	0.00147004	0.0454288	1.34267
ENSMUSG00000031563	2266.49	-0.208351	0.0655617	-3.17793	0.00148329	0.0455159	1.34184
ENSMUSG00000049871	40.3711	-0.690179	0.217181	-3.1779	0.00148344	0.0455159	1.34184
ENSMUSG00000057716	15784.7	-0.193791	0.0609765	-3.17813	0.0014823	0.0455159	1.34184
ENSMUSG00000092060	683.09	-0.247002	0.0776922	-3.17923	0.00147666	0.0455159	1.34184
ENSMUSG00000024883	1936.23	-0.351473	0.110616	-3.17743	0.00148589	0.0455183	1.34181
ENSMUSG00000021377	1743.7	0.205495	0.064724	3.17495	0.00149864	0.04573	1.3398
ENSMUSG00000033061	1315.24	0.401822	0.12657	3.1747	0.00149993	0.04573	1.3398
ENSMUSG00000112393	65.9608	-0.631095	0.198746	-3.17538	0.00149641	0.04573	1.3398
ENSMUSG00000001143	1165.87	-0.219176	0.0691043	-3.17168	0.00151562	0.0461353	1.33597
ENSMUSG00000038354	364.721	0.255094	0.0804581	3.17052	0.00152167	0.0462462	1.33492
ENSMUSG00000034544	1853.06	0.238845	0.0753666	3.16911	0.00152909	0.0463239	1.33419
ENSMUSG00000070047	6526.33	-0.196372	0.061961	-3.16928	0.00152815	0.0463239	1.33419
ENSMUSG00000091623	26.2852	-0.785205	0.247804	-3.16866	0.00153145	0.0463239	1.33419
ENSMUSG00000002083	87.9623	-0.652649	0.20608	-3.16696	0.00154039	0.0465212	1.33235
ENSMUSG00000037111	12898.5	-0.161799	0.0510975	-3.16647	0.00154301	0.0465272	1.33229
ENSMUSG00000024913	467.55	-0.267467	0.084533	-3.16405	0.00155588	0.0466401	1.33124
ENSMUSG00000037833	235.35	-0.639043	0.201932	-3.16464	0.00155275	0.0466401	1.33124
ENSMUSG00000041324	1394.29	-0.54336	0.171735	-3.16395	0.00155645	0.0466401	1.33124
ENSMUSG00000046093	26615.2	-0.231099	0.0730291	-3.16448	0.00155363	0.0466401	1.33124
ENSMUSG00000026640	13074.6	-0.167223	0.0528702	-3.1629	0.00156207	0.0467052	1.33063
ENSMUSG00000031987	2935.23	-0.229868	0.0726927	-3.16218	0.0015659	0.0467052	1.33063
ENSMUSG00000034891	14300.7	0.234385	0.0741148	3.16246	0.00156444	0.0467052	1.33063
ENSMUSG00000026712	380.57	-0.55944	0.176991	-3.16084	0.00157315	0.0468486	1.3293
ENSMUSG00000104936	336.513	-0.656555	0.207834	-3.15903	0.00158294	0.0470674	1.32728
ENSMUSG00000097311	1293.77	-0.2278	0.0722029	-3.155	0.00160497	0.0476486	1.32195
ENSMUSG00000033615	24614.8	0.263261	0.0834637	3.1542	0.0016094	0.0477068	1.32142
ENSMUSG00000055134	47.6662	-0.653241	0.207181	-3.153	0.00161602	0.0478291	1.32031
ENSMUSG00000022240	15002.2	-0.138522	0.0439428	-3.15232	0.00161976	0.0478663	1.31997
ENSMUSG00000027353	212.831	0.327132	0.103804	3.15145	0.00162463	0.0479367	1.31933
ENSMUSG00000055932	6906.42	0.170199	0.0540561	3.14855	0.00164082	0.0483402	1.31569
ENSMUSG00000069273	270.006	-0.585102	0.185867	-3.14795	0.00164417	0.0483648	1.31547
ENSMUSG00000058441	3014.63	0.168616	0.0535755	3.14725	0.00164811	0.0484068	1.31509
ENSMUSG00000000568	6794.84	0.127546	0.0405554	3.14498	0.00166099	0.0485884	1.31347
ENSMUSG00000021113	2301.35	0.16449	0.0523052	3.14482	0.00166188	0.0485884	1.31347
ENSMUSG00000049571	213.41	0.449035	0.142751	3.14558	0.00165755	0.0485884	1.31347
ENSMUSG00000055485	1201.19	-0.307534	0.0978314	-3.14351	0.00166933	0.0487322	1.31218
ENSMUSG00000030413	96.7294	-0.62933	0.200326	-3.14153	0.00168069	0.0489896	1.3099
ENSMUSG00000029994	169.533	0.374853	0.119364	3.14043	0.00168701	0.0490993	1.30892
ENSMUSG00000021957	3657.47	0.205839	0.0655544	3.13997	0.00168964	0.0491017	1.3089
ENSMUSG00000026389	214.359	-0.365534	0.116478	-3.13821	0.00169985	0.0493239	1.30694
ENSMUSG00000031864	2750.3	-0.179102	0.0570965	-3.13683	0.00170786	0.0494816	1.30556
ENSMUSG00000074578	313.785	0.520785	0.166061	3.13611	0.00171207	0.0495291	1.30514
ENSMUSG00000055430	8713.07	0.291926	0.0931789	3.13296	0.0017305	0.0499871	1.30114
ENSMUSG00000060336	Zfp937
ENSMUSG00000063364	3300002I08Rik
ENSMUSG00000063393	Gm10130
ENSMUSG00000068130	Zfp442
ENSMUSG00000068134	Zfp120
ENSMUSG00000074731	Zfp345
ENSMUSG00000079008	Gm14124
ENSMUSG00000079009	Gm14139
ENSMUSG00000017667	Zfp334
ENSMUSG00000056824	Zfp663
ENSMUSG00000067480	Gm14403
ENSMUSG00000074519	Etohi1 (Zfp971)
ENSMUSG00000074521	Gm14327
ENSMUSG00000074527	Gm14296
ENSMUSG00000074529	C330013J21Rik (Zfp972)
ENSMUSG00000078861	Zfp931
ENSMUSG00000078862	Gm14326
ENSMUSG00000078863	Gm14325
ENSMUSG00000078864	Gm14322
ENSMUSG00000078865	Gm14406
ENSMUSG00000078866	Gm14420 (Zfp970)
ENSMUSG00000078867	Gm14418
ENSMUSG00000078868	Gm14412
ENSMUSG00000078870	Gm14410
ENSMUSG00000078872	Gm14401
ENSMUSG00000078875	Gm14419
ENSMUSG00000078876	Gm14408
ENSMUSG00000078877	Gm14295
ENSMUSG00000078878	Gm14305
ENSMUSG00000078879	Gm14306 (Zfp973)
ENSMUSG00000078880	Gm14308
ENSMUSG00000078881	Gm14434
ENSMUSG00000078882	Gm14431 (Zfp967)
ENSMUSG00000078883	Gm14430
ENSMUSG00000078884	Gm14436
ENSMUSG00000078885	Gm14432
ENSMUSG00000078886	Gm2026
ENSMUSG00000078887	Gm6710
ENSMUSG00000078888	Gm2007
ENSMUSG00000078889	Gm14288
ENSMUSG00000078890	Gm11007
ENSMUSG00000078891	Gm11008
ENSMUSG00000078893	Gm2004
ENSMUSG00000078894	2210418O10Rik
ENSMUSG00000078895	Gm11009
ENSMUSG00000078896	Gm8923 (Zfp965)
ENSMUSG00000078897	Gm4724
ENSMUSG00000078898	Gm4723 (Zfp968)
ENSMUSG00000078899	Gm4631
ENSMUSG00000078901	Gm14440
ENSMUSG00000078902	Gm14443
ENSMUSG00000078903	Gm14391
ENSMUSG00000078905	Gm14393
ENSMUSG00000078906	Gm14444
ENSMUSG00000089756	Gm8898 (Zfp966)
ENSMUSG00000089951	Gm14435 (Zfp968-ps)
ENSMUSG00000090093	Gm14399
ENSMUSG00000090221	Gm4245 (Zfp969)
ENSMUSG00000078503	Gm13225 (Zfp990)
ENSMUSG00000058186	Gm13242 (Zfp980)
ENSMUSG00000078500	Gm13235 (Zfp986)
ENSMUSG00000063245	Gm13248 (Zfp993)
ENSMUSG00000056300	Gm13247 (Zfp981)
ENSMUSG00000070605	Gm13251 (Zfp992)
ENSMUSG00000078499	Rex2
ENSMUSG00000066009	Gm13051 (Zfp987)
ENSMUSG00000066007	Zfp600
ENSMUSG00000086147	Gm13150 (Zfp989)
ENSMUSG00000067919	Gm13138
ENSMUSG00000067916	Gm13139 (Zfp991)
ENSMUSG00000078498	Gm13151 (Zfp988)
ENSMUSG00000078497	Gm13145 (Zfp978)
ENSMUSG00000078496	Gm13152 (Zfp982)
ENSMUSG00000065999	Gm13154 (Zfp985)
ENSMUSG00000066000	2610305D13Rik (Zfp979)
ENSMUSG00000062518	Zfp534
ENSMUSG00000078495	Gm13157 (Zfp984)
ENSMUSG00000059423	Zfp933
ENSMUSG00000023284	Zfp605
ENSMUSG00000066613	Zfp932
ENSMUSG00000072762	4930522L14Rik
ENSMUSG00000072763	5430403G16Rik
ENSMUSG00000090015	Gm15446
ENSMUSG00000029729	Zkscan1
ENSMUSG00000037007	Zfp113
ENSMUSG00000036898	Zfp157
ENSMUSG00000056014	A430033K04Rik
ENSMUSG00000058291	Zfp68
ENSMUSG00000029587	Zfp12
ENSMUSG00000046658	Zfp316
ENSMUSG00000061898	Rbak
ENSMUSG00000007812	Zfp655
ENSMUSG00000029627	Zkscan14
ENSMUSG00000055991	Zkscan5
ENSMUSG00000070420	Zfp498
ENSMUSG00000025821	Zfp282
ENSMUSG00000045466	Zfp956
ENSMUSG00000051499	Zfp786
ENSMUSG00000052763	Zfp212
ENSMUSG00000057691	Zfp746
ENSMUSG00000062519	Zfp398
ENSMUSG00000071477	Zfp777
ENSMUSG00000030145	Zfp248
ENSMUSG00000072623	Zfp9
ENSMUSG00000030443	Zfp583
ENSMUSG00000054893	Zfp667
ENSMUSG00000055150	Zfp78
ENSMUSG00000062861	Zfp28
ENSMUSG00000034538	Zfp418
ENSMUSG00000062116	Zfp954
ENSMUSG00000063535	Zfp773
ENSMUSG00000066838	Zfp772
ENSMUSG00000030386	Zfp606
ENSMUSG00000034071	Zfp551
ENSMUSG00000004500	Zfp324
ENSMUSG00000033961	Zfp446
ENSMUSG00000058638	Zfp110
ENSMUSG00000060397	Zfp128
ENSMUSG00000030486	Zfp108
ENSMUSG00000047603	Zfp235
ENSMUSG00000050605	Zfp61
ENSMUSG00000052675	Zfp112
ENSMUSG00000055305	Zfp93
ENSMUSG00000057101	Zfp180
ENSMUSG00000068962	Zfp114
ENSMUSG00000074282	Zfp94
ENSMUSG00000074283	Zfp109
ENSMUSG00000087598	Zfp111
ENSMUSG00000020420	Zfp607
ENSMUSG00000030604	Zfp626
ENSMUSG00000037640	Zfp60
ENSMUSG00000057093	C030039L03Rik
ENSMUSG00000063047	Zfp780b
ENSMUSG00000070709	1700049G17Rik
ENSMUSG00000078779	Zfp59
ENSMUSG00000011427	Zfp790
ENSMUSG00000046185	Zfp84
ENSMUSG00000047473	Zfp30
ENSMUSG00000053985	Zfp14
ENSMUSG00000058447	Zfp82
ENSMUSG00000059975	Zfp74
ENSMUSG00000062040	Zfp27
ENSMUSG00000074220	Zfp382
ENSMUSG00000074221	Zfp568
ENSMUSG00000078768	Zfp566
ENSMUSG00000056383	AI987944
ENSMUSG00000074165	Zfp788
ENSMUSG00000074166	AW146154
ENSMUSG00000090744	Gm6871
ENSMUSG00000091474	2610021A01Rik
ENSMUSG00000069727	Gm5595 (Zfp975)
ENSMUSG00000074158	9830147E19Rik
ENSMUSG00000091594	Gm17067
ENSMUSG00000092225	Gm2381
ENSMUSG00000092335	Gm7221 (ZFP977）
ENSMUSG00000092416	Zfp141
ENSMUSG00000012640	Zfp715
ENSMUSG00000064194	Zfp936
ENSMUSG00000074887	EU599041
ENSMUSG00000030469	Zfp719
ENSMUSG00000055102	Zfp819
ENSMUSG00000056592	Zfp658
ENSMUSG00000030823	9130019O22Rik
ENSMUSG00000045251	Zfp688
ENSMUSG00000045757	Zfp764
ENSMUSG00000048921	Zfp689
ENSMUSG00000054381	Zfp747
ENSMUSG00000078580	E430018J23Rik
ENSMUSG00000043090	Zfp866
ENSMUSG00000054648	Zfp869
ENSMUSG00000060427	Zfp868
ENSMUSG00000091764	Zfp964
ENSMUSG00000092260	Zfp963
ENSMUSG00000092544	Gm20422
ENSMUSG00000052446	Zfp961
ENSMUSG00000056019	Zfp709
ENSMUSG00000066880	Zfp617
ENSMUSG00000089857	Zfp882
ENSMUSG00000045519	Zfp560
ENSMUSG00000058192	Zfp846
ENSMUSG00000059475	Zfp426
ENSMUSG00000060510	Zfp266
ENSMUSG00000063108	Zfp26
ENSMUSG00000057982	Zfp809
ENSMUSG00000062794	Zfp599
ENSMUSG00000066829	Zfp810
ENSMUSG00000074472	Zfp872
ENSMUSG00000062540	Zfp781
ENSMUSG00000074860	Gm10778
ENSMUSG00000078436	Gm4767
ENSMUSG00000078437	Gm3055
ENSMUSG00000062931	Zfp938
ENSMUSG00000078435	AU041133
ENSMUSG00000020335	Zfp354b
ENSMUSG00000020364	Zfp354a
ENSMUSG00000044296	Zfp879
ENSMUSG00000044807	Zfp354c
ENSMUSG00000048728	Zfp454
ENSMUSG00000020491	2810021J22Rik
ENSMUSG00000037001	Zfp39
ENSMUSG00000068869	Gm12258
ENSMUSG00000020472	Zkscan17
ENSMUSG00000054519	Zfp867
ENSMUSG00000005267	Zfp287
ENSMUSG00000047342	Zfp286
ENSMUSG00000062632	Gm12588
ENSMUSG00000078564	Gm9631
ENSMUSG00000021327	Zkscan3
ENSMUSG00000063894	Zfp192
ENSMUSG00000055228	Zfp935
ENSMUSG00000072066	6720489N17Rik
ENSMUSG00000074865	Zfp934
ENSMUSG00000074867	Zfp808
ENSMUSG00000091183	Gm3604
ENSMUSG00000021510	A530054K11Rik
ENSMUSG00000030446	Zfp273
ENSMUSG00000048280	Zfp738
ENSMUSG00000051037	Zfp455
ENSMUSG00000052909	Gm9894
ENSMUSG00000055341	Zfp457
ENSMUSG00000055480	Zfp458
ENSMUSG00000055560	Zfp459
ENSMUSG00000056552	Zfp953
ENSMUSG00000057396	Zfp759
ENSMUSG00000057842	Zfp595
ENSMUSG00000058093	AA987161
ENSMUSG00000058246	Gm10037
ENSMUSG00000058331	Zfp85-rs1
ENSMUSG00000058883	Zfp708
ENSMUSG00000058900	Rsl1
ENSMUSG00000059839	Zfp874b
ENSMUSG00000069204	Zfp748
ENSMUSG00000069206	Zfp874a
ENSMUSG00000071281	Zfp71-rs1
ENSMUSG00000071285	Zfp87
ENSMUSG00000071291	Zfp58
ENSMUSG00000071295	Gm10323
ENSMUSG00000074824	Rslcan18
ENSMUSG00000074830	Zfp640
ENSMUSG00000078994	Zfp429
ENSMUSG00000078995	Zfp456
ENSMUSG00000090641	Zfp712
ENSMUSG00000090659	Zfp493
ENSMUSG00000069184	Zfp72
ENSMUSG00000069208	Zfp825
ENSMUSG00000022526	Zfp251
ENSMUSG00000033669	Zfp7
ENSMUSG00000054967	Zfp647
ENSMUSG00000022529	Zfp263
ENSMUSG00000039789	Zfp597
ENSMUSG00000067034	Zfp960
ENSMUSG00000072761	Gm6712
ENSMUSG00000073452	Zfp97
ENSMUSG00000023882	Zfp54
ENSMUSG00000023892	Zfp51
ENSMUSG00000033972	Zfp944
ENSMUSG00000035868	3110052M02Rik
ENSMUSG00000044501	Zfp758
ENSMUSG00000051341	Zfp52
ENSMUSG00000053347	Zfp943
ENSMUSG00000057409	Zfp53
ENSMUSG00000061544	Zfp229
ENSMUSG00000062743	Zfp677
ENSMUSG00000063383	Zfp947
ENSMUSG00000067928	Zfp760
ENSMUSG00000067931	Zfp948
ENSMUSG00000069743	Zfp820
ENSMUSG00000071266	Zfp946
ENSMUSG00000071267	Zfp942
ENSMUSG00000078546	2210404O09Rik
ENSMUSG00000062012	Zfp13
ENSMUSG00000071256	Zfp213
ENSMUSG00000003929	Zfp81
ENSMUSG00000008686	Zfp955a
ENSMUSG00000024298	Zfp871
ENSMUSG00000053390	Zfp952
ENSMUSG00000053600	Zfp472
ENSMUSG00000055202	Zfp811
ENSMUSG00000055240	Zfp101
ENSMUSG00000057254	Zfp870
ENSMUSG00000059000	Zfp799
ENSMUSG00000061532	Zfp955b
ENSMUSG00000067424	Zfp563
ENSMUSG00000067430	Zfp763
ENSMUSG00000003198	Zfp959
ENSMUSG00000057835	Zfp119a
ENSMUSG00000062101	Zfp119b
ENSMUSG00000023165	Ssxb2
ENSMUSG00000035371	Ssx9
ENSMUSG00000068218	Ssxb9
ENSMUSG00000068219	Ssxb10
ENSMUSG00000071816	Ssxb5
ENSMUSG00000079699	Gm6592
ENSMUSG00000079701	Ssxb3
ENSMUSG00000079703	Ssxb8
ENSMUSG00000079704	Gm14459
ENSMUSG00000079705	Ssxb1
ENSMUSG00000031079	Zfp300
ENSMUSG00000054737	Zfp182
ENSMUSG00000062814	Ssxa1
ENSMUSG00000040596	Pogk
ENSMUSG00000034800	Zfp661
ENSMUSG00000033883	D3Ertd254e
ENSMUSG00000028389	Zfp37
ENSMUSG00000038630	Zkscan16
ENSMUSG00000039634	Zfp189
ENSMUSG00000051351	Zfp46
ENSMUSG00000064141	Zfp69
ENSMUSG00000072774	Zfp951
ENSMUSG00000061969	Gm5581
ENSMUSG00000002266	Zim1
ENSMUSG00000030393	Zik1
ENSMUSG00000030757	Zkscan2
ENSMUSG00000048012	Zfp473
ENSMUSG00000060314	Zfp941
ENSMUSG00000068959	Zfp619
ENSMUSG00000031907	Zfp90
ENSMUSG00000044676	Zfp612
ENSMUSG00000055835	Zfp1
ENSMUSG00000058748	Zfp958
ENSMUSG00000059897	Zfp930
ENSMUSG00000074194	Zfp791
ENSMUSG00000091388	Gm17576
ENSMUSG00000025602	Zfp202
ENSMUSG00000032425	Zfp949
ENSMUSG00000043773	1700048O20Rik
ENSMUSG00000047036	Zfp445
ENSMUSG00000057551	Zfp317
ENSMUSG00000074500	Zfp558
ENSMUSG00000074829	2010315B03Rik
ENSMUSG00000050844	1700020N01Rik
ENSMUSG00000060301	2610008E11Rik
ENSMUSG00000018347	Zkscan6
ENSMUSG00000060630	Zfp735
ENSMUSG00000069476	Zfp616
ENSMUSG00000042063	Zfp386
ENSMUSG00000073158	9030624G23Rik
ENSMUSG00000073184	Gm10479
ENSMUSG00000073197	5730507C01Rik
ENSMUSG00000006720	Zfp184
ENSMUSG00000021514	Zfp369
ENSMUSG00000050954	Zfp169
ENSMUSG00000071302	Gm10324
ENSMUSG00000074832	2410141K09Rik (Zfp998)
ENSMUSG00000022987	Zfp641
ENSMUSG00000034429	Zfp707
ENSMUSG00000080717	B230307C23Rik
ENSMUSG00000002617	Zfp40
ENSMUSG00000036036	Zfp57
ENSMUSG00000051977	Prdm9
ENSMUSG00000059142	Zfp945
ENSMUSG00000067942	Zfp160
ENSMUSG00000092139	NCBIM37
ENSMUSG00000031374	Zfp92
ENSMUSG00000079697	Gm5751

## Sheet: CTX YO
Gene	baseMean	log2FoldChange	lfcSE	stat	pvalue	padj	Volcano FDR
ENSMUSG00000078502	64.9678	3.74996	0.281335	13.3292	1.56616e-40	6.34792e-37	36.1974
ENSMUSG00000062743	143.59	0.599902	0.12944	4.63459	3.57639e-06	0.000337109	3.47223
ENSMUSG00000063383	22.5156	1.15856	0.28105	4.12226	3.75173e-05	0.00230735	2.63689
ENSMUSG00000036036	282.815	-0.499715	0.142804	-3.49929	0.000466491	0.0175916	1.75469
ENSMUSG00000055202	365.331	-0.306145	0.0895523	-3.41861	0.000629414	0.0221195	1.65522
ENSMUSG00000078502	Gm13212 (Zfp268)
ENSMUSG00000062743	Zfp677
ENSMUSG00000063383	Zfp947
ENSMUSG00000055202	Zfp811
ENSMUSG00000036036	Zfp57
ENSMUSG00000045498	569.716	1.25457	0.076064	16.4936	4.0785e-61	9.9185e-57	56.0036
ENSMUSG00000056999	4792.12	-1.19935	0.0779499	-15.3862	2.02568e-53	2.46313e-49	48.6085
ENSMUSG00000022076	128.039	-2.01746	0.133845	-15.0731	2.43343e-51	1.97262e-47	46.705
ENSMUSG00000009075	567.197	1.2262	0.0880159	13.9316	4.06977e-44	2.47432e-40	39.6065
ENSMUSG00000041596	883.871	2.34223	0.169589	13.8112	2.18312e-43	1.06183e-39	38.9739
ENSMUSG00000009376	300.583	-1.93317	0.148887	-12.9842	1.50481e-38	5.22793e-35	34.2817
ENSMUSG00000100586	75.7839	3.37665	0.262513	12.8628	7.28778e-38	2.21539e-34	33.6545
ENSMUSG00000051599	525.997	1.47324	0.12157	12.1184	8.4344e-34	2.27907e-30	29.6422
ENSMUSG00000073418	844.902	1.15385	0.0963288	11.9782	4.61998e-33	1.12353e-29	28.9494
ENSMUSG00000109006	2315.07	0.793557	0.0693524	11.4424	2.5675e-30	5.67628e-27	26.2459
ENSMUSG00000020891	293.915	1.28354	0.113238	11.3349	8.81028e-30	1.78548e-26	25.7482
ENSMUSG00000041828	389.011	1.28525	0.113848	11.2891	1.48519e-29	2.77833e-26	25.5562
ENSMUSG00000025888	132.391	1.72719	0.159305	10.8421	2.17444e-27	3.77716e-24	23.4228
ENSMUSG00000093773	43.315	3.17	0.298728	10.6116	2.63114e-26	4.26578e-23	22.37
ENSMUSG00000044043	1465.59	0.726949	0.0724372	10.0356	1.06334e-23	1.61621e-20	19.7915
ENSMUSG00000051242	835.669	1.08118	0.10835	9.97865	1.89024e-23	2.70405e-20	19.568
ENSMUSG00000040565	4647.66	-0.694697	0.0709281	-9.79439	1.19018e-22	1.608e-19	18.7937
ENSMUSG00000115529	60.9478	-2.74294	0.281521	-9.74329	1.97073e-22	2.52243e-19	18.5982
ENSMUSG00000030223	668.612	-0.964913	0.0994113	-9.70627	2.83535e-22	3.44764e-19	18.4625
ENSMUSG00000104420	350.717	1.63102	0.168177	9.69822	3.06818e-22	3.5531e-19	18.4494
ENSMUSG00000045876	378.066	1.20795	0.129412	9.33416	1.01797e-20	1.12527e-17	16.9487
ENSMUSG00000040649	804.195	-0.687272	0.0738457	-9.30687	1.31657e-20	1.36513e-17	16.8648
ENSMUSG00000051678	394.579	1.07072	0.115098	9.30261	1.37045e-20	1.36513e-17	16.8648
ENSMUSG00000113342	30.7637	4.83427	0.519809	9.30008	1.40336e-20	1.36513e-17	16.8648
ENSMUSG00000051486	555.554	0.816364	0.0881456	9.26154	2.01513e-20	1.88485e-17	16.7247
ENSMUSG00000045689	420.208	1.05761	0.114284	9.25426	2.1571e-20	1.94291e-17	16.7115
ENSMUSG00000063687	523.5	0.844509	0.0920145	9.17799	4.39194e-20	3.81455e-17	16.4186
ENSMUSG00000047945	667.362	-1.17408	0.131811	-8.90729	5.22936e-19	4.38527e-16	15.358
ENSMUSG00000052504	512.051	-1.05125	0.118504	-8.87105	7.246e-19	5.87385e-16	15.2311
ENSMUSG00000068696	1519.86	-0.983702	0.118131	-8.32724	8.27512e-17	6.4917e-14	13.1876
ENSMUSG00000073590	188.727	0.995696	0.120698	8.2495	1.59059e-16	1.2088e-13	12.9176
ENSMUSG00000105594	239.699	1.2587	0.154743	8.13414	4.14872e-16	3.05736e-13	12.5147
ENSMUSG00000027356	30.8523	3.53772	0.436458	8.10552	5.25187e-16	3.75648e-13	12.4252
ENSMUSG00000073530	107.005	-2.18479	0.279405	-7.81944	5.30596e-15	3.68673e-12	11.4334
ENSMUSG00000103332	727.786	0.709393	0.0908132	7.81156	5.64837e-15	3.81563e-12	11.4184
ENSMUSG00000103897	887.094	0.6859	0.0895704	7.65766	1.89346e-14	1.24452e-11	10.905
ENSMUSG00000004707	24.7473	2.43143	0.32012	7.59538	3.06891e-14	1.96402e-11	10.7069
ENSMUSG00000029826	441.382	0.689807	0.0913201	7.55372	4.22998e-14	2.63766e-11	10.5788
ENSMUSG00000116525	117.937	-1.38834	0.183933	-7.54804	4.41872e-14	2.68647e-11	10.5708
ENSMUSG00000087620	2571.01	0.47864	0.0638057	7.50152	6.30824e-14	3.74171e-11	10.4269
ENSMUSG00000096107	129.404	1.40162	0.188738	7.42626	1.11712e-13	6.46838e-11	10.1892
ENSMUSG00000104264	49.0983	1.83154	0.247298	7.4062	1.29971e-13	7.35059e-11	10.1337
ENSMUSG00000102516	667.477	1.49869	0.202572	7.39827	1.37968e-13	7.62556e-11	10.1177
ENSMUSG00000076431	849.852	-0.694148	0.093929	-7.39014	1.46673e-13	7.92654e-11	10.1009
ENSMUSG00000090667	1016.24	0.987872	0.133768	7.38497	1.52486e-13	8.06155e-11	10.0936
ENSMUSG00000044726	45.8859	1.58393	0.214855	7.37208	1.67984e-13	8.6919e-11	10.0609
ENSMUSG00000030256	1771.02	0.554053	0.0752362	7.36417	1.78246e-13	9.03075e-11	10.0443
ENSMUSG00000095041	14152.5	1.29547	0.176953	7.32099	2.46152e-13	1.22167e-10	9.91305
ENSMUSG00000017400	5487.2	0.499243	0.0691662	7.21803	5.2746e-13	2.56546e-10	9.59083
ENSMUSG00000041608	378.289	0.668553	0.093456	7.15366	8.44925e-13	4.02897e-10	9.39481
ENSMUSG00000104674	175.543	1.08753	0.15216	7.1473	8.84986e-13	4.13884e-10	9.38312
ENSMUSG00000004894	371.725	1.08834	0.152485	7.13732	9.51685e-13	4.3668e-10	9.35984
ENSMUSG00000046743	2229.28	-0.619556	0.0883697	-7.01095	2.367e-12	1.06598e-09	8.97225
ENSMUSG00000020732	124.085	1.17585	0.170804	6.88419	5.81167e-12	2.56971e-09	8.59012
ENSMUSG00000024501	1440.82	-0.654753	0.0952285	-6.8756	6.17303e-12	2.68075e-09	8.57174
ENSMUSG00000028487	496.489	0.992114	0.14521	6.83227	8.35821e-12	3.56602e-09	8.44782
ENSMUSG00000086181	123.15	-1.23029	0.180711	-6.80807	9.89198e-12	4.14764e-09	8.3822
ENSMUSG00000026452	5919.05	0.659334	0.0969284	6.80227	1.02983e-11	4.24481e-09	8.37214
ENSMUSG00000059182	692.6	0.503055	0.0740582	6.7927	1.10058e-11	4.46082e-09	8.35059
ENSMUSG00000056656	201.6	0.759025	0.111808	6.78863	1.132e-11	4.51296e-09	8.34554
ENSMUSG00000110020	130.902	-0.822687	0.1215	-6.77107	1.27831e-11	5.01407e-09	8.29981
ENSMUSG00000010825	436.518	1.13145	0.168513	6.7143	1.88971e-11	7.29459e-09	8.137
ENSMUSG00000024339	300.945	0.634707	0.0946645	6.7048	2.01678e-11	7.66344e-09	8.11558
ENSMUSG00000021585	1080.6	0.519595	0.0782215	6.64261	3.08176e-11	1.15301e-08	7.93817
ENSMUSG00000026344	1012.16	-0.885334	0.135795	-6.51964	7.04756e-11	2.59681e-08	7.58556
ENSMUSG00000063632	956.631	-0.624941	0.0959828	-6.51097	7.46673e-11	2.7102e-08	7.567
ENSMUSG00000027004	665.439	-0.686135	0.105486	-6.50451	7.79477e-11	2.78766e-08	7.55476
ENSMUSG00000025366	653.243	0.607718	0.0939779	6.4666	1.00229e-10	3.53258e-08	7.45191
ENSMUSG00000063804	590.391	0.838752	0.130082	6.44789	1.13418e-10	3.94031e-08	7.40447
ENSMUSG00000103793	908.595	0.603621	0.0941576	6.41075	1.44805e-10	4.89097e-08	7.3106
ENSMUSG00000112968	87.2642	1.4459	0.225468	6.41286	1.42811e-10	4.89097e-08	7.3106
ENSMUSG00000113651	26.7485	1.7892	0.281731	6.35075	2.14271e-10	7.13815e-08	7.14641
ENSMUSG00000058498	313.426	1.08872	0.171551	6.34634	2.20501e-10	7.24644e-08	7.13988
ENSMUSG00000098097	74.7848	-1.39413	0.21989	-6.34013	2.29571e-10	7.44391e-08	7.1282
ENSMUSG00000069662	6073.01	-0.583598	0.0922132	-6.3288	2.47082e-10	7.90629e-08	7.10203
ENSMUSG00000103882	177.505	1.62378	0.256789	6.32342	2.55842e-10	8.0803e-08	7.09257
ENSMUSG00000028222	4024.3	-0.757292	0.119826	-6.31992	2.61699e-10	8.15929e-08	7.08835
ENSMUSG00000052469	16.0212	6.19607	0.9904	6.25613	3.94649e-10	1.21487e-07	6.91547
ENSMUSG00000067203	42.8741	1.27723	0.204245	6.25344	4.01515e-10	1.22055e-07	6.91344
ENSMUSG00000073411	1102.69	0.425256	0.0681037	6.24424	4.25869e-10	1.2786e-07	6.89326
ENSMUSG00000039474	2380.33	-0.550278	0.0882572	-6.23494	4.51943e-10	1.34034e-07	6.87278
ENSMUSG00000044667	8672.72	-0.407687	0.0654518	-6.22882	4.69973e-10	1.37702e-07	6.86106
ENSMUSG00000022656	2692.31	-0.611011	0.0984903	-6.20377	5.51278e-10	1.59602e-07	6.79696
ENSMUSG00000084350	173.135	0.737263	0.119747	6.15685	7.42069e-10	2.1231e-07	6.67303
ENSMUSG00000026414	142.406	0.9772	0.159264	6.13573	8.47704e-10	2.39713e-07	6.62031
ENSMUSG00000104093	96.9644	1.05983	0.172849	6.13151	8.7051e-10	2.43333e-07	6.6138
ENSMUSG00000024598	252.194	-0.840674	0.137241	-6.12555	9.03734e-10	2.49749e-07	6.6025
ENSMUSG00000042817	676.737	0.542357	0.0888032	6.1074	1.01266e-09	2.76706e-07	6.55798
ENSMUSG00000090799	425.264	0.6205	0.101761	6.09759	1.0768e-09	2.90964e-07	6.53616
ENSMUSG00000043458	602.969	0.453449	0.0744925	6.08717	1.14921e-09	3.07116e-07	6.5127
ENSMUSG00000085773	21.9723	2.24363	0.371035	6.04696	1.47606e-09	3.90176e-07	6.40874
ENSMUSG00000029816	109.855	1.08611	0.180528	6.01631	1.78435e-09	4.66598e-07	6.33106
ENSMUSG00000076441	668.197	0.502555	0.083829	5.995	2.0349e-09	5.26455e-07	6.27864
ENSMUSG00000040118	17708.2	-0.272734	0.0458143	-5.95304	2.632e-09	6.73764e-07	6.17149
ENSMUSG00000038128	6379.54	-0.317914	0.0534905	-5.94337	2.79219e-09	7.07326e-07	6.15038
ENSMUSG00000072663	54.8763	1.12634	0.189597	5.94069	2.83832e-09	7.09706e-07	6.14892
ENSMUSG00000109209	22.9149	2.05616	0.346188	5.93944	2.85995e-09	7.09706e-07	6.14892
ENSMUSG00000052581	2855.76	-0.379769	0.0647472	-5.86541	4.48021e-09	1.10055e-06	5.95839
ENSMUSG00000045083	3374.89	-0.352346	0.0601194	-5.86076	4.60741e-09	1.12048e-06	5.9506
ENSMUSG00000056306	818.129	-0.62742	0.107238	-5.8507	4.89503e-09	1.17864e-06	5.92862
ENSMUSG00000091712	501.172	0.82506	0.14131	5.83865	5.26257e-09	1.25471e-06	5.90146
ENSMUSG00000047307	511.951	0.611073	0.104909	5.82477	5.7192e-09	1.35034e-06	5.86956
ENSMUSG00000042834	2724.25	-0.556418	0.0958529	-5.80492	6.43983e-09	1.50587e-06	5.82221
ENSMUSG00000026399	254.045	-0.655333	0.113177	-5.79033	7.02473e-09	1.62699e-06	5.78861
ENSMUSG00000060962	15.1544	-2.23088	0.38542	-5.78818	7.11537e-09	1.63244e-06	5.78716
ENSMUSG00000015879	256.654	-0.55652	0.0962649	-5.78113	7.41987e-09	1.68639e-06	5.77304
ENSMUSG00000031543	5064.09	0.416199	0.0720399	5.77734	7.58894e-09	1.70885e-06	5.7673
ENSMUSG00000036777	847.039	0.880966	0.152768	5.76669	8.08447e-09	1.80373e-06	5.74383
ENSMUSG00000047658	1797.72	-0.340196	0.059054	-5.76076	8.37375e-09	1.85128e-06	5.73253
ENSMUSG00000047205	1057.21	-0.649698	0.113192	-5.73978	9.47985e-09	2.07694e-06	5.68258
ENSMUSG00000106644	107.379	0.854651	0.149193	5.72849	1.01329e-08	2.20021e-06	5.65754
ENSMUSG00000052229	1205.83	-0.763232	0.133507	-5.7168	1.08546e-08	2.33605e-06	5.63152
ENSMUSG00000015568	567.161	-0.695181	0.121872	-5.70421	1.16885e-08	2.49345e-06	5.6032
ENSMUSG00000002341	13836.6	-0.388433	0.0682272	-5.69323	1.24659e-08	2.63616e-06	5.57903
ENSMUSG00000064115	26223	-0.29576	0.0522591	-5.6595	1.51814e-08	3.18273e-06	5.4972
ENSMUSG00000059327	142.567	-0.765231	0.13525	-5.65791	1.5323e-08	3.18496e-06	5.4969
ENSMUSG00000030513	605.676	0.451527	0.0803983	5.61613	1.95277e-08	4.02453e-06	5.39529
ENSMUSG00000020681	724.274	0.341938	0.0611747	5.58953	2.2769e-08	4.58617e-06	5.33855
ENSMUSG00000028555	137.934	0.896705	0.160519	5.5863	2.31958e-08	4.58617e-06	5.33855
ENSMUSG00000046607	666.399	-0.794977	0.142224	-5.5896	2.27598e-08	4.58617e-06	5.33855
ENSMUSG00000058420	1169.97	-0.545879	0.0977162	-5.58637	2.31867e-08	4.58617e-06	5.33855
ENSMUSG00000084843	60.5412	1.10924	0.198466	5.58907	2.28295e-08	4.58617e-06	5.33855
ENSMUSG00000034151	38.471	-1.2816	0.229605	-5.58175	2.38113e-08	4.6699e-06	5.33069
ENSMUSG00000053411	1955.64	0.31115	0.0557922	5.57694	2.44785e-08	4.76233e-06	5.32218
ENSMUSG00000021280	61.6502	1.00422	0.180993	5.54841	2.88285e-08	5.54538e-06	5.25607
ENSMUSG00000061232	582.748	0.556629	0.100337	5.54761	2.89594e-08	5.54538e-06	5.25607
ENSMUSG00000047632	156.66	-0.716727	0.130038	-5.51165	3.5548e-08	6.75385e-06	5.17045
ENSMUSG00000107677	107.419	0.906098	0.16475	5.49985	3.80114e-08	7.16588e-06	5.14473
ENSMUSG00000038507	427.557	0.425191	0.0774433	5.49035	4.01129e-08	7.5039e-06	5.12471
ENSMUSG00000094910	3402.44	-0.515838	0.0944326	-5.4625	4.69475e-08	8.71539e-06	5.05971
ENSMUSG00000028364	141.598	-0.805912	0.14782	-5.452	4.98059e-08	9.17598e-06	5.03735
ENSMUSG00000019768	86.2608	-0.912998	0.168107	-5.43104	5.60275e-08	1.02446e-05	4.9895
ENSMUSG00000002459	1245.64	-0.456405	0.0841386	-5.42445	5.8134e-08	1.04723e-05	4.97996
ENSMUSG00000059187	1885.03	-0.512812	0.0945342	-5.42462	5.80769e-08	1.04723e-05	4.97996
ENSMUSG00000110649	92.6351	0.797298	0.147027	5.42279	5.86746e-08	1.0492e-05	4.97914
ENSMUSG00000057606	40.6229	-1.52401	0.28142	-5.41543	6.11411e-08	1.08532e-05	4.96444
ENSMUSG00000040364	70.223	1.03657	0.191459	5.41403	6.16222e-08	1.08594e-05	4.9642
ENSMUSG00000031099	3048.64	-0.350299	0.0647675	-5.40856	6.35326e-08	1.11155e-05	4.95407
ENSMUSG00000016496	126.508	0.755902	0.140253	5.38955	7.06342e-08	1.22129e-05	4.91318
ENSMUSG00000046844	1143.84	-0.585655	0.108674	-5.3891	7.08095e-08	1.22129e-05	4.91318
ENSMUSG00000011256	1226.56	-0.665444	0.123568	-5.38526	7.23394e-08	1.23263e-05	4.90917
ENSMUSG00000031558	3497.37	-0.395127	0.0733768	-5.38491	7.24809e-08	1.23263e-05	4.90917
ENSMUSG00000044352	1674.32	-0.59388	0.110462	-5.37634	7.60172e-08	1.28379e-05	4.89151
ENSMUSG00000086596	234.204	-0.636532	0.118485	-5.37228	7.77484e-08	1.30397e-05	4.88473
ENSMUSG00000091680	97.6745	1.03671	0.194544	5.32892	9.87967e-08	1.64564e-05	4.78366
ENSMUSG00000113429	199.824	-0.640059	0.120436	-5.31452	1.06937e-07	1.76912e-05	4.75224
ENSMUSG00000002900	436.115	-0.537912	0.101296	-5.31031	1.0944e-07	1.7983e-05	4.74514
ENSMUSG00000045441	1609.77	-0.441414	0.0831784	-5.30683	1.1155e-07	1.82067e-05	4.73977
ENSMUSG00000028631	422.843	0.539305	0.101844	5.29539	1.18761e-07	1.92544e-05	4.71547
ENSMUSG00000051652	428.433	-0.478807	0.090488	-5.29138	1.21394e-07	1.95508e-05	4.70884
ENSMUSG00000022483	40.2527	1.46178	0.277667	5.26452	1.40558e-07	2.23769e-05	4.6502
ENSMUSG00000039457	46.0205	1.49766	0.284556	5.26314	1.41612e-07	2.23769e-05	4.6502
ENSMUSG00000060550	16.0839	1.97789	0.375808	5.26303	1.41702e-07	2.23769e-05	4.6502
ENSMUSG00000034533	29.6759	1.99386	0.379098	5.25949	1.44457e-07	2.26649e-05	4.64465
ENSMUSG00000026519	634.743	0.570576	0.108569	5.25544	1.47675e-07	2.30212e-05	4.63787
ENSMUSG00000062372	544.148	-0.907407	0.173469	-5.23095	1.68642e-07	2.61223e-05	4.58299
ENSMUSG00000032500	1288.99	-0.413525	0.0794435	-5.20526	1.9372e-07	2.98169e-05	4.52554
ENSMUSG00000097604	198.532	-0.804633	0.154927	-5.19362	2.06241e-07	3.15445e-05	4.50108
ENSMUSG00000036095	8942.93	-0.522943	0.100927	-5.18138	2.20249e-07	3.34764e-05	4.47526
ENSMUSG00000045912	472.332	-0.561181	0.108349	-5.17939	2.22609e-07	3.3625e-05	4.47334
ENSMUSG00000049538	131.708	-0.883743	0.171114	-5.16466	2.40881e-07	3.61603e-05	4.44177
ENSMUSG00000036923	215.529	-0.558557	0.108234	-5.16066	2.46079e-07	3.67141e-05	4.43517
ENSMUSG00000025479	15.0409	2.55672	0.495826	5.15649	2.51626e-07	3.73128e-05	4.42814
ENSMUSG00000002147	735.362	0.339995	0.0660843	5.14487	2.67701e-07	3.92183e-05	4.40651
ENSMUSG00000026043	217.802	-1.24092	0.241144	-5.14597	2.66147e-07	3.92183e-05	4.40651
ENSMUSG00000021070	37.3483	1.16183	0.225903	5.14305	2.70313e-07	3.93637e-05	4.4049
ENSMUSG00000030110	144.742	-0.835769	0.162881	-5.13116	2.87957e-07	4.14616e-05	4.38235
ENSMUSG00000036006	2772.11	-0.32185	0.062726	-5.13105	2.88129e-07	4.14616e-05	4.38235
ENSMUSG00000036422	717.112	-0.565571	0.110263	-5.1293	2.90822e-07	4.16029e-05	4.38088
ENSMUSG00000073164	26.1676	-1.96441	0.383338	-5.12449	2.9835e-07	4.2374e-05	4.3729
ENSMUSG00000085526	74.0705	-0.816721	0.159403	-5.12364	2.99697e-07	4.2374e-05	4.3729
ENSMUSG00000084898	187.227	-0.766567	0.149806	-5.11705	3.10351e-07	4.36267e-05	4.36025
ENSMUSG00000110249	3252.9	-0.291387	0.0569898	-5.11297	3.1713e-07	4.43235e-05	4.35337
ENSMUSG00000064215	405.633	0.523559	0.102468	5.10952	3.22985e-07	4.48838e-05	4.34791
ENSMUSG00000028630	2931.97	-0.419386	0.08216	-5.10451	3.31659e-07	4.58274e-05	4.33887
ENSMUSG00000104454	191.688	1.06065	0.208193	5.09457	3.49536e-07	4.80247e-05	4.31854
ENSMUSG00000034872	150.054	1.01932	0.200486	5.08427	3.69044e-07	5.04201e-05	4.2974
ENSMUSG00000006522	795.408	0.622065	0.122606	5.07368	3.9019e-07	5.30114e-05	4.27563
ENSMUSG00000015852	580.169	-0.586568	0.115786	-5.06596	4.06357e-07	5.49011e-05	4.26042
ENSMUSG00000004031	5539.56	-0.228245	0.0450941	-5.06152	4.15931e-07	5.55771e-05	4.2551
ENSMUSG00000025128	1071.5	-0.432304	0.0854083	-5.06162	4.15715e-07	5.55771e-05	4.2551
ENSMUSG00000035929	108.43	0.853403	0.168843	5.05442	4.3171e-07	5.73702e-05	4.24131
ENSMUSG00000051323	2308.21	-0.462765	0.0920295	-5.02844	4.94474e-07	6.53539e-05	4.18473
ENSMUSG00000103472	974.353	0.567918	0.112983	5.0266	4.99264e-07	6.56302e-05	4.1829
ENSMUSG00000104572	15.4593	2.16535	0.432704	5.00423	5.60851e-07	7.33298e-05	4.13472
ENSMUSG00000074575	743.517	-0.631274	0.126539	-4.98876	6.07679e-07	7.90275e-05	4.10222
ENSMUSG00000014592	20893.6	0.23137	0.0464323	4.98295	6.26224e-07	8.10061e-05	4.09148
ENSMUSG00000027199	2967.22	0.488086	0.0981065	4.97506	6.5227e-07	8.34871e-05	4.07838
ENSMUSG00000061186	183.742	-0.675399	0.135738	-4.97575	6.49959e-07	8.34871e-05	4.07838
ENSMUSG00000040929	4173.81	-0.392272	0.079013	-4.96465	6.88267e-07	8.76333e-05	4.05733
ENSMUSG00000030337	7762.84	0.44061	0.0889038	4.95602	7.19504e-07	9.06813e-05	4.04248
ENSMUSG00000031605	5337.94	-0.236134	0.0476462	-4.95598	7.19663e-07	9.06813e-05	4.04248
ENSMUSG00000028753	223.719	-0.537872	0.10863	-4.95143	7.36688e-07	9.21974e-05	4.03528
ENSMUSG00000047786	1736.37	-0.566761	0.11448	-4.95075	7.39277e-07	9.21974e-05	4.03528
ENSMUSG00000021214	94.8486	0.975553	0.197187	4.94735	7.5229e-07	9.30303e-05	4.03138
ENSMUSG00000025738	26298	-0.247326	0.049995	-4.94701	7.53607e-07	9.30303e-05	4.03138
ENSMUSG00000054509	560.263	0.398964	0.08068	4.94501	7.61386e-07	9.35159e-05	4.02911
ENSMUSG00000032323	117.618	-0.840908	0.170158	-4.94191	7.73593e-07	9.45378e-05	4.02439
ENSMUSG00000022773	478.131	-0.618037	0.1251	-4.94036	7.79783e-07	9.48178e-05	4.02311
ENSMUSG00000105891	157.149	0.870281	0.176224	4.9385	7.87275e-07	9.52525e-05	4.02112
ENSMUSG00000006411	221.518	0.59239	0.120002	4.93652	7.95289e-07	9.57457e-05	4.01888
ENSMUSG00000052374	324.657	-0.583783	0.11838	-4.93145	8.16219e-07	9.77815e-05	4.00974
ENSMUSG00000023800	2650.61	-0.361827	0.0733857	-4.93048	8.20264e-07	9.77843e-05	4.00973
ENSMUSG00000004637	885.742	0.40382	0.0819318	4.92874	8.27634e-07	9.81816e-05	4.00797
ENSMUSG00000024736	6058.9	-0.41857	0.0850631	-4.9207	8.62368e-07	0.000100827	3.99643
ENSMUSG00000031355	202.05	-0.602314	0.122376	-4.92185	8.57314e-07	0.000100827	3.99643
ENSMUSG00000045062	459.867	0.486604	0.0988804	4.92114	8.60423e-07	0.000100827	3.99643
ENSMUSG00000103677	498.052	0.464007	0.0943433	4.91828	8.73093e-07	0.000101592	3.99314
ENSMUSG00000074591	102.968	0.721072	0.146877	4.90937	9.13701e-07	0.000105811	3.97547
ENSMUSG00000066129	5727.79	0.350697	0.071514	4.90389	9.39583e-07	0.000108292	3.9654
ENSMUSG00000031137	4041.75	-0.339721	0.0694214	-4.89361	9.9005e-07	0.000113571	3.94473
ENSMUSG00000037855	22651.8	-0.330546	0.0675616	-4.89251	9.95559e-07	0.000113667	3.94437
ENSMUSG00000053093	147.012	-1.029	0.210515	-4.88801	1.01863e-06	0.000115757	3.93645
ENSMUSG00000002997	2407.05	-0.306812	0.0627824	-4.88691	1.02432e-06	0.000115863	3.93606
ENSMUSG00000023963	282.24	0.677907	0.139024	4.87619	1.08154e-06	0.000121769	3.91446
ENSMUSG00000055197	4.75623	5.01415	1.03012	4.86755	1.12992e-06	0.00012663	3.89747
ENSMUSG00000041923	6146.17	-0.390841	0.0803634	-4.86342	1.15375e-06	0.000128706	3.8904
ENSMUSG00000032174	3763.51	-0.43685	0.0899655	-4.85575	1.19931e-06	0.000133135	3.87571
ENSMUSG00000033740	384.898	0.618063	0.127307	4.85491	1.2044e-06	0.000133135	3.87571
ENSMUSG00000021259	5316.88	-0.259875	0.0535828	-4.84997	1.23478e-06	0.000135876	3.86686
ENSMUSG00000050944	332.657	-0.424248	0.0875993	-4.84305	1.27862e-06	0.000140067	3.85366
ENSMUSG00000037280	326.489	0.673632	0.139439	4.83101	1.35841e-06	0.000148139	3.82933
ENSMUSG00000002032	1844.9	0.267731	0.055459	4.82755	1.38226e-06	0.000149401	3.82565
ENSMUSG00000091898	133.997	-1.11151	0.230209	-4.82829	1.37713e-06	0.000149401	3.82565
ENSMUSG00000059585	85.1656	0.839149	0.173967	4.82361	1.40986e-06	0.00015171	3.81899
ENSMUSG00000046093	24556.1	-0.564517	0.117211	-4.81623	1.46294e-06	0.000156728	3.80485
ENSMUSG00000044176	235.497	-0.714054	0.148442	-4.81033	1.50684e-06	0.000160723	3.79392
ENSMUSG00000021733	1475.26	-0.306534	0.0637426	-4.80893	1.51738e-06	0.00016114	3.7928
ENSMUSG00000074489	49.013	1.01224	0.210707	4.80402	1.55512e-06	0.000164431	3.78402
ENSMUSG00000075014	110.517	1.1274	0.235194	4.79349	1.63903e-06	0.000172552	3.76308
ENSMUSG00000022758	110.662	0.640301	0.133824	4.78464	1.71292e-06	0.000179554	3.74581
ENSMUSG00000049571	236.433	0.653402	0.136804	4.77619	1.78646e-06	0.000185663	3.73128
ENSMUSG00000074892	1265.98	0.450898	0.0944012	4.7764	1.78461e-06	0.000185663	3.73128
ENSMUSG00000073929	12.7996	2.02162	0.424385	4.76365	1.9012e-06	0.000196746	3.70609
ENSMUSG00000038932	7.53558	-2.92599	0.614398	-4.76236	1.91339e-06	0.000197169	3.70516
ENSMUSG00000033295	3148.34	-0.412264	0.0866549	-4.75754	1.95964e-06	0.000200238	3.69845
ENSMUSG00000047712	757.789	-0.350067	0.0735713	-4.7582	1.95324e-06	0.000200238	3.69845
ENSMUSG00000030134	7201.1	-0.24567	0.0516595	-4.75557	1.97887e-06	0.000201356	3.69603
ENSMUSG00000043822	341.845	0.425268	0.0895654	4.74813	2.05311e-06	0.00020804	3.68185
ENSMUSG00000050822	102.358	-0.941774	0.198654	-4.74077	2.1291e-06	0.000214845	3.66788
ENSMUSG00000021130	4475.88	0.279342	0.0589579	4.73799	2.15852e-06	0.00021602	3.66551
ENSMUSG00000086844	86.9375	1.10358	0.232888	4.73869	2.15107e-06	0.00021602	3.66551
ENSMUSG00000090061	3458.25	-0.547151	0.115568	-4.73447	2.19631e-06	0.000218902	3.65975
ENSMUSG00000102440	975.724	0.559315	0.118426	4.7229	2.32509e-06	0.000230791	3.63678
ENSMUSG00000031563	2246.54	-0.29728	0.0631142	-4.7102	2.47476e-06	0.00024465	3.61146
ENSMUSG00000022883	2852.33	-0.327255	0.0695666	-4.7042	2.54858e-06	0.000250072	3.60193
ENSMUSG00000103483	97.9532	0.754344	0.16036	4.70408	2.55018e-06	0.000250072	3.60193
ENSMUSG00000037321	131.35	0.678252	0.144284	4.70082	2.5912e-06	0.000252062	3.59849
ENSMUSG00000046764	6.70533	4.92709	1.04808	4.70105	2.58826e-06	0.000252062	3.59849
ENSMUSG00000055333	61.8129	-0.830139	0.177327	-4.68141	2.8491e-06	0.000276044	3.55902
ENSMUSG00000052087	814.03	-0.467759	0.0999361	-4.68058	2.86068e-06	0.000276067	3.55899
ENSMUSG00000007682	5184.13	-0.67297	0.144232	-4.66588	3.07304e-06	0.000295389	3.52961
ENSMUSG00000035967	3193.05	0.25883	0.0555814	4.65677	3.2121e-06	0.00030754	3.5121
ENSMUSG00000026170	130.701	0.612108	0.131897	4.64079	3.47083e-06	0.000331008	3.48016
ENSMUSG00000028541	1919.29	-0.313964	0.0676689	-4.63971	3.48907e-06	0.000331448	3.47958
ENSMUSG00000030077	8189.91	-0.476374	0.102724	-4.6374	3.52821e-06	0.000333862	3.47643
ENSMUSG00000026994	76.9677	-0.80407	0.173525	-4.63373	3.59141e-06	0.000337218	3.47209
ENSMUSG00000044783	2454.99	0.379542	0.0819924	4.62899	3.67446e-06	0.000343689	3.46383
ENSMUSG00000100009	78.7675	0.851198	0.183956	4.62718	3.70682e-06	0.000345388	3.46169
ENSMUSG00000041120	922.067	-0.602584	0.130263	-4.62589	3.73001e-06	0.000346222	3.46065
ENSMUSG00000027536	23.1254	1.48414	0.320908	4.6248	3.74952e-06	0.00034671	3.46003
ENSMUSG00000017417	1543.29	0.336152	0.0727112	4.62311	3.78036e-06	0.000348237	3.45813
ENSMUSG00000015134	66.3065	-1.17472	0.254403	-4.61756	3.8828e-06	0.000355226	3.44949
ENSMUSG00000070867	411.597	0.431184	0.0933822	4.61742	3.88545e-06	0.000355226	3.44949
ENSMUSG00000020102	6147.57	-0.290976	0.0630412	-4.61565	3.91869e-06	0.000356923	3.44742
ENSMUSG00000021340	1451.1	0.363986	0.078875	4.61471	3.9364e-06	0.000357199	3.44709
ENSMUSG00000035168	2493.8	0.467579	0.101461	4.60844	4.05702e-06	0.000366261	3.43621
ENSMUSG00000038530	21613.4	-0.452911	0.0982888	-4.60796	4.06639e-06	0.000366261	3.43621
ENSMUSG00000105948	9.84776	2.20361	0.478612	4.60416	4.14135e-06	0.000371636	3.42988
ENSMUSG00000104597	13002.1	-0.231633	0.0503967	-4.5962	4.30268e-06	0.000384694	3.41488
ENSMUSG00000058881	932.271	0.283991	0.0618413	4.59225	4.38492e-06	0.000388581	3.41052
ENSMUSG00000097178	25.7597	-1.78288	0.388226	-4.59237	4.38235e-06	0.000388581	3.41052
ENSMUSG00000098128	125.964	-0.625836	0.136294	-4.59181	4.39409e-06	0.000388581	3.41052
ENSMUSG00000038702	1260.84	-0.390491	0.0851199	-4.58754	4.48491e-06	0.000391284	3.40751
ENSMUSG00000083889	97.9114	0.721965	0.157371	4.58766	4.48237e-06	0.000391284	3.40751
ENSMUSG00000102543	5754.8	-0.388621	0.0847156	-4.58735	4.48901e-06	0.000391284	3.40751
ENSMUSG00000114189	23.3911	1.27299	0.277404	4.58893	4.45514e-06	0.000391284	3.40751
ENSMUSG00000022464	27.0833	-1.15811	0.253651	-4.56578	4.9765e-06	0.000432227	3.36429
ENSMUSG00000000794	1044.98	-0.336438	0.0738645	-4.5548	5.24345e-06	0.000453791	3.34314
ENSMUSG00000026042	158.293	-0.649056	0.142566	-4.55266	5.29719e-06	0.000456817	3.34026
ENSMUSG00000032554	3855.21	0.596728	0.131124	4.55085	5.34286e-06	0.000459127	3.33807
ENSMUSG00000074151	91.3978	0.927984	0.204083	4.54709	5.43922e-06	0.000465762	3.33184
ENSMUSG00000032936	7607.39	-0.372775	0.0820333	-4.54418	5.51483e-06	0.000468934	3.32889
ENSMUSG00000070564	417.843	0.613629	0.135014	4.54492	5.49561e-06	0.000468934	3.32889
ENSMUSG00000034768	102.621	0.710227	0.156476	4.5389	5.65482e-06	0.000479163	3.31952
ENSMUSG00000026354	42.5972	-0.879004	0.193777	-4.53617	5.72849e-06	0.000482645	3.31637
ENSMUSG00000044912	3955.51	-0.28725	0.0633281	-4.53591	5.73562e-06	0.000482645	3.31637
ENSMUSG00000020848	294.929	-0.668333	0.14743	-4.53322	5.80924e-06	0.000487155	3.31233
ENSMUSG00000049164	1021.44	-0.381305	0.0841769	-4.5298	5.90388e-06	0.000491716	3.30829
ENSMUSG00000058897	2014.5	-0.452262	0.0998415	-4.5298	5.90407e-06	0.000491716	3.30829
ENSMUSG00000034684	250.508	-0.596808	0.131967	-4.52242	6.11375e-06	0.000507441	3.29461
ENSMUSG00000032036	1628.33	-0.296571	0.0655984	-4.521	6.15468e-06	0.000509101	3.2932
ENSMUSG00000047117	20.483	1.39647	0.309577	4.51089	6.45559e-06	0.000532181	3.27394
ENSMUSG00000028176	16102.3	-0.223241	0.0495423	-4.50608	6.60377e-06	0.000538916	3.26848
ENSMUSG00000053199	9336.78	-0.297969	0.0661176	-4.50665	6.58585e-06	0.000538916	3.26848
ENSMUSG00000057182	3348.5	-0.294664	0.0653765	-4.50718	6.5695e-06	0.000538916	3.26848
ENSMUSG00000052912	19.1871	1.47983	0.328747	4.50144	6.74945e-06	0.000548963	3.26046
ENSMUSG00000110027	228.887	0.720976	0.160284	4.49812	6.85572e-06	0.000555748	3.25512
ENSMUSG00000050423	193.565	-0.64271	0.142998	-4.49455	6.97165e-06	0.000563267	3.24929
ENSMUSG00000027848	572.228	-0.54012	0.120215	-4.49296	7.02409e-06	0.000565625	3.24747
ENSMUSG00000036863	154.214	-0.553566	0.123518	-4.48165	7.40687e-06	0.000594481	3.22586
ENSMUSG00000036098	1676.85	0.553245	0.12375	4.47067	7.79768e-06	0.000623788	3.20496
ENSMUSG00000024621	2670.1	-0.465655	0.104201	-4.4688	7.86583e-06	0.000627178	3.20261
ENSMUSG00000026833	25169.5	-0.256502	0.0574811	-4.46237	8.10578e-06	0.000642218	3.19232
ENSMUSG00000079084	1562.45	0.246347	0.055206	4.46233	8.10728e-06	0.000642218	3.19232
ENSMUSG00000113784	15.7522	1.57829	0.354218	4.4557	8.36197e-06	0.000660243	3.1803
ENSMUSG00000054920	1455.54	-0.297958	0.0669778	-4.44861	8.64279e-06	0.000680207	3.16736
ENSMUSG00000057554	958.204	0.278781	0.0628325	4.43689	9.12676e-06	0.00071598	3.1451
ENSMUSG00000020160	167.718	0.665391	0.150105	4.43285	9.29963e-06	0.000727195	3.13835
ENSMUSG00000028906	5456.74	0.386562	0.0872351	4.43127	9.36813e-06	0.000730203	3.13656
ENSMUSG00000022208	11214.9	-0.358202	0.0808581	-4.43001	9.42294e-06	0.000732129	3.13541
ENSMUSG00000095616	404.903	4.77875	1.07913	4.42831	9.49732e-06	0.000735558	3.13338
ENSMUSG00000055942	3.59281	4.59204	1.03847	4.42192	9.78297e-06	0.000755276	3.12189
ENSMUSG00000030209	91602.6	-0.306738	0.0693925	-4.42033	9.85499e-06	0.000758429	3.12009
ENSMUSG00000047797	281.923	0.635058	0.143775	4.41703	1.00066e-05	0.000767664	3.11483
ENSMUSG00000058571	925.739	-0.550427	0.124688	-4.41442	1.01283e-05	0.000774563	3.11094
ENSMUSG00000022421	26720.6	-0.358272	0.0812161	-4.41134	1.02732e-05	0.00078318	3.10614
ENSMUSG00000022053	23.9431	-1.33462	0.303192	-4.40191	1.07304e-05	0.000815475	3.08859
ENSMUSG00000033880	550.671	0.493814	0.11221	4.40079	1.07856e-05	0.000817118	3.08772
ENSMUSG00000020758	297.763	0.484634	0.110189	4.3982	1.09153e-05	0.000824375	3.08388
ENSMUSG00000020396	2339.45	0.453833	0.103335	4.39187	1.12382e-05	0.000846137	3.07256
ENSMUSG00000055413	14.3489	2.00526	0.457155	4.3864	1.15243e-05	0.000864996	3.06299
ENSMUSG00000050910	1283.17	0.295887	0.0676599	4.37315	1.22464e-05	0.000916369	3.03793
ENSMUSG00000070421	12.7632	1.89285	0.433074	4.37073	1.23831e-05	0.000923759	3.03444
ENSMUSG00000022454	17428	-0.23298	0.0533155	-4.36985	1.24333e-05	0.000924668	3.03401
ENSMUSG00000097083	201.797	-0.489653	0.112112	-4.36752	1.25664e-05	0.000931711	3.03072
ENSMUSG00000020086	555.612	-0.29241	0.067078	-4.35925	1.30508e-05	0.000964688	3.01561
ENSMUSG00000030994	244.904	0.512555	0.117605	4.35827	1.31095e-05	0.000966089	3.01498
ENSMUSG00000047419	968.79	0.316404	0.0726393	4.35583	1.32563e-05	0.000973955	3.01146
ENSMUSG00000052707	5411.09	0.236479	0.0544537	4.34276	1.40706e-05	0.00103068	2.98688
ENSMUSG00000025237	4883.27	-0.191601	0.0441836	-4.33647	1.44792e-05	0.00105741	2.97576
ENSMUSG00000031837	414.71	-0.432943	0.0998999	-4.33377	1.46576e-05	0.00106724	2.97174
ENSMUSG00000103749	729.387	0.558249	0.128925	4.33002	1.49095e-05	0.00108234	2.96564
ENSMUSG00000005251	10.5586	1.84844	0.427363	4.32523	1.52373e-05	0.00110157	2.95799
ENSMUSG00000087266	174.069	0.494182	0.114266	4.32483	1.5265e-05	0.00110157	2.95799
ENSMUSG00000009471	12.5861	1.79888	0.416289	4.32124	1.55158e-05	0.00111636	2.9522
ENSMUSG00000052477	8.33726	2.62527	0.608042	4.31757	1.57754e-05	0.00112731	2.94796
ENSMUSG00000111994	60.8059	1.11935	0.259226	4.31806	1.57403e-05	0.00112731	2.94796
ENSMUSG00000113560	8.58755	2.12967	0.493306	4.31713	1.58071e-05	0.00112731	2.94796
ENSMUSG00000056116	688.246	0.429928	0.0999212	4.30267	1.68752e-05	0.00119997	2.92083
ENSMUSG00000024053	108.436	0.891442	0.207713	4.29169	1.77317e-05	0.00125719	2.9006
ENSMUSG00000052155	2256.64	-0.2776	0.0648507	-4.2806	1.86394e-05	0.00131771	2.88018
ENSMUSG00000036218	227.16	-0.613756	0.143657	-4.27238	1.93401e-05	0.00135543	2.86792
ENSMUSG00000044469	233.897	-0.521579	0.122066	-4.27294	1.92913e-05	0.00135543	2.86792
ENSMUSG00000047139	97.7823	-0.735677	0.172177	-4.2728	1.93031e-05	0.00135543	2.86792
ENSMUSG00000033885	1614.75	0.23003	0.0539306	4.26529	1.99642e-05	0.00139299	2.85605
ENSMUSG00000095681	11.0915	-1.93366	0.45338	-4.265	1.99906e-05	0.00139299	2.85605
ENSMUSG00000074505	25626.9	-0.358357	0.0840884	-4.26167	2.02904e-05	0.00140983	2.85083
ENSMUSG00000037872	1074.95	-0.396721	0.0931053	-4.261	2.03519e-05	0.00141008	2.85076
ENSMUSG00000046480	5918.49	0.460864	0.108239	4.25784	2.06412e-05	0.00142606	2.84586
ENSMUSG00000089914	8.78437	-2.45024	0.57559	-4.25691	2.07269e-05	0.00142792	2.8453
ENSMUSG00000103088	863.148	0.491282	0.115491	4.25386	2.10116e-05	0.00144345	2.8406
ENSMUSG00000020914	26.4464	-1.37882	0.32496	-4.24304	2.20508e-05	0.00150891	2.82134
ENSMUSG00000022894	152.55	-0.597692	0.140877	-4.24266	2.20886e-05	0.00150891	2.82134
ENSMUSG00000089679	76.8131	1.26601	0.298665	4.23889	2.24625e-05	0.00153015	2.81526
ENSMUSG00000070327	1788.22	0.422385	0.0998621	4.22968	2.34022e-05	0.00158972	2.79868
ENSMUSG00000029994	180.235	0.477784	0.113021	4.22741	2.36401e-05	0.0016014	2.7955
ENSMUSG00000034460	424.583	0.544844	0.12896	4.2249	2.39052e-05	0.00161486	2.79187
ENSMUSG00000036904	153.161	-0.58824	0.139412	-4.21943	2.44923e-05	0.00164994	2.78253
ENSMUSG00000041046	129.004	-0.71197	0.168791	-4.21806	2.4641e-05	0.00165537	2.78111
ENSMUSG00000033965	1349.17	-0.374064	0.0887406	-4.21525	2.495e-05	0.00165781	2.78046
ENSMUSG00000035860	63.0071	1.13512	0.269233	4.21612	2.48541e-05	0.00165781	2.78046
ENSMUSG00000055134	45.6594	-0.908123	0.215423	-4.21553	2.49193e-05	0.00165781	2.78046
ENSMUSG00000091636	215.419	0.503247	0.119355	4.21639	2.48248e-05	0.00165781	2.78046
ENSMUSG00000059742	27594.3	-0.188648	0.0447659	-4.21411	2.50769e-05	0.0016617	2.77945
ENSMUSG00000002265	31300.1	0.274138	0.065091	4.21162	2.5355e-05	0.00167557	2.77584
ENSMUSG00000045180	4405.21	-0.413774	0.0984985	-4.20082	2.6595e-05	0.00175275	2.75628
ENSMUSG00000047759	126.161	0.568181	0.135275	4.2002	2.66683e-05	0.00175283	2.75626
ENSMUSG00000022724	347.89	-0.445258	0.106103	-4.19649	2.71079e-05	0.00177215	2.7515
ENSMUSG00000085125	168.653	0.627015	0.149408	4.19666	2.70884e-05	0.00177215	2.7515
ENSMUSG00000032172	4514.28	-0.320949	0.0765896	-4.19051	2.78326e-05	0.00181464	2.74121
ENSMUSG00000027253	2775.28	-0.436441	0.104721	-4.16765	3.07762e-05	0.0020012	2.69871
ENSMUSG00000020080	486.265	-0.616016	0.148182	-4.15715	3.22248e-05	0.0020898	2.6799
ENSMUSG00000022636	9210.78	-0.326085	0.0784593	-4.1561	3.23727e-05	0.00209381	2.67906
ENSMUSG00000024593	1788.51	0.254319	0.061218	4.15431	3.26265e-05	0.00210463	2.67683
ENSMUSG00000044719	8.61346	1.98961	0.479476	4.14955	3.33134e-05	0.00213759	2.67008
ENSMUSG00000052848	222.381	-0.461339	0.111173	-4.14973	3.3286e-05	0.00213759	2.67008
ENSMUSG00000042529	473.712	-0.534245	0.128811	-4.14752	3.36089e-05	0.00215088	2.66738
ENSMUSG00000027750	89.6729	-1.02758	0.247864	-4.14575	3.38699e-05	0.00215586	2.66638
ENSMUSG00000055027	40.3602	-0.8914	0.215009	-4.14587	3.38526e-05	0.00215586	2.66638
ENSMUSG00000109792	135.825	0.896696	0.216322	4.14519	3.39526e-05	0.00215586	2.66638
ENSMUSG00000098741	5.31023	3.2486	0.78453	4.14082	3.4606e-05	0.00219162	2.65923
ENSMUSG00000005973	400.382	-0.385106	0.0930253	-4.13979	3.47619e-05	0.00219578	2.65841
ENSMUSG00000062151	1769.94	-0.33319	0.0805781	-4.135	3.54959e-05	0.00223633	2.65046
ENSMUSG00000091243	327.583	-0.424571	0.102704	-4.13392	3.56629e-05	0.00224105	2.64955
ENSMUSG00000039372	968.069	-0.446616	0.10814	-4.12997	3.62815e-05	0.00226467	2.64499
ENSMUSG00000045838	318.91	0.414127	0.100279	4.12973	3.63182e-05	0.00226467	2.64499
ENSMUSG00000072591	64.3907	-0.898293	0.217514	-4.12982	3.63052e-05	0.00226467	2.64499
ENSMUSG00000118202	4451.63	-0.226489	0.0548572	-4.1287	3.64812e-05	0.00226902	2.64416
ENSMUSG00000090486	47.6152	0.760247	0.184193	4.12744	3.6682e-05	0.00227569	2.64289
ENSMUSG00000038732	84.65	0.718741	0.174171	4.12663	3.68116e-05	0.00227792	2.64246
ENSMUSG00000045657	375.886	0.412673	0.100025	4.1257	3.69612e-05	0.00228137	2.6418
ENSMUSG00000026676	256.638	-0.666309	0.16165	-4.12193	3.75719e-05	0.00230735	2.63689
ENSMUSG00000015354	187.507	0.49976	0.121567	4.11099	3.93967e-05	0.00240726	2.61848
ENSMUSG00000020263	3031.55	0.226375	0.0550621	4.11127	3.93489e-05	0.00240726	2.61848
ENSMUSG00000038517	1345.76	0.390428	0.095012	4.10925	3.96943e-05	0.00241937	2.6163
ENSMUSG00000052572	29204.7	-0.254612	0.062003	-4.10644	4.01803e-05	0.00244286	2.6121
ENSMUSG00000079465	32.154	0.965873	0.235337	4.10422	4.05682e-05	0.00246029	2.60901
ENSMUSG00000024924	4419.83	-0.250778	0.0611762	-4.09928	4.14443e-05	0.00250717	2.60082
ENSMUSG00000049493	511.199	0.439066	0.107124	4.09869	4.15497e-05	0.00250731	2.60079
ENSMUSG00000028601	216.268	-0.415041	0.101438	-4.09159	4.28427e-05	0.00257894	2.58856
ENSMUSG00000062939	72.0137	-0.629743	0.154151	-4.08523	4.4034e-05	0.0026441	2.57772
ENSMUSG00000033342	2436.04	-0.280466	0.0686823	-4.08353	4.43565e-05	0.00265691	2.57562
ENSMUSG00000060780	1312.9	-0.372584	0.0912609	-4.08262	4.45302e-05	0.00266076	2.57499
ENSMUSG00000010021	60.8087	-0.891627	0.218596	-4.07888	4.52538e-05	0.00269737	2.56906
ENSMUSG00000026471	234.708	0.522376	0.12812	4.07725	4.55716e-05	0.00270372	2.56804
ENSMUSG00000104063	667.971	0.512955	0.125811	4.07719	4.55828e-05	0.00270372	2.56804
ENSMUSG00000073514	8177.6	-0.30988	0.076072	-4.07351	4.63104e-05	0.0027402	2.56222
ENSMUSG00000049928	111.278	0.667359	0.164084	4.06717	4.7587e-05	0.0028089	2.55146
ENSMUSG00000019194	13087.3	0.273315	0.0673205	4.0599	4.90935e-05	0.00289081	2.53898
ENSMUSG00000085235	65.0912	0.789923	0.194697	4.05719	4.96671e-05	0.00291752	2.53499
ENSMUSG00000020723	789.156	-0.29421	0.0725704	-4.05413	5.03219e-05	0.00294886	2.53035
ENSMUSG00000053626	133.093	-0.514711	0.127047	-4.05136	5.09215e-05	0.00297683	2.52625
ENSMUSG00000041309	151.083	0.617906	0.152584	4.04962	5.13012e-05	0.00299183	2.52406
ENSMUSG00000066189	4624.18	-0.310275	0.0766415	-4.04839	5.15705e-05	0.00300034	2.52283
ENSMUSG00000021200	111.995	0.575485	0.142226	4.04627	5.20404e-05	0.00302046	2.51993
ENSMUSG00000022187	16.01	-1.32003	0.326527	-4.04265	5.28504e-05	0.00306016	2.51426
ENSMUSG00000117864	186.386	0.832255	0.205908	4.04188	5.3025e-05	0.00306298	2.51386
ENSMUSG00000033196	55.3601	0.915439	0.226744	4.03733	5.40632e-05	0.00311555	2.50647
ENSMUSG00000041261	582.494	-0.426307	0.105693	-4.03345	5.49646e-05	0.00316001	2.50031
ENSMUSG00000025584	770.118	0.379926	0.0943663	4.02607	5.6716e-05	0.00324515	2.48877
ENSMUSG00000042524	1616.87	0.420157	0.104355	4.02623	5.66781e-05	0.00324515	2.48877
ENSMUSG00000053024	6324.4	0.29198	0.0725365	4.02529	5.69058e-05	0.00324515	2.48877
ENSMUSG00000079055	1518.31	0.294624	0.0731989	4.02498	5.69793e-05	0.00324515	2.48877
ENSMUSG00000044847	1399.68	-0.537802	0.133674	-4.02324	5.7404e-05	0.0032617	2.48656
ENSMUSG00000049281	2684.21	-0.406103	0.101086	-4.01739	5.88473e-05	0.00333592	2.47678
ENSMUSG00000025789	67.8294	-0.76512	0.191078	-4.00424	6.22176e-05	0.00351877	2.45361
ENSMUSG00000015846	1309.43	0.319464	0.0798114	4.00273	6.26146e-05	0.003533	2.45186
ENSMUSG00000104868	682.792	-0.424589	0.106252	-3.99604	6.44112e-05	0.00362596	2.44058
ENSMUSG00000018593	4392.78	0.483567	0.121057	3.99455	6.48172e-05	0.00364039	2.43885
ENSMUSG00000092274	3636.12	0.658885	0.165017	3.99283	6.52897e-05	0.00365007	2.4377
ENSMUSG00000113121	393.407	-0.63644	0.159378	-3.99327	6.5167e-05	0.00365007	2.4377
ENSMUSG00000058997	3960.16	0.187202	0.0470294	3.98052	6.87645e-05	0.00382864	2.41696
ENSMUSG00000079190	5.12182	3.15252	0.792009	3.9804	6.87987e-05	0.00382864	2.41696
ENSMUSG00000026614	541.883	-0.397606	0.0999068	-3.97976	6.89839e-05	0.00383018	2.41678
ENSMUSG00000028860	47.2189	0.909389	0.228636	3.97746	6.96556e-05	0.00385867	2.41356
ENSMUSG00000038370	2211.6	0.359751	0.0905725	3.97196	7.12832e-05	0.00393752	2.40478
ENSMUSG00000059213	23302.2	-0.336524	0.0847334	-3.97156	7.14029e-05	0.00393752	2.40478
ENSMUSG00000055639	274.02	0.423704	0.10672	3.97026	7.17951e-05	0.00395019	2.40338
ENSMUSG00000116081	600.977	-0.46618	0.117725	-3.95993	7.4973e-05	0.00411573	2.38555
ENSMUSG00000027547	5.14222	3.1489	0.795417	3.95881	7.53238e-05	0.00412568	2.3845
ENSMUSG00000068129	4.7529	3.41416	0.862552	3.95821	7.55131e-05	0.00412675	2.38439
ENSMUSG00000033590	653.477	0.750875	0.189806	3.95601	7.62112e-05	0.00414627	2.38234
ENSMUSG00000060675	754.463	0.41976	0.106105	3.95606	7.61953e-05	0.00414627	2.38234
ENSMUSG00000113920	16.7553	1.62227	0.410165	3.95516	7.64832e-05	0.00415177	2.38177
ENSMUSG00000070687	25.4461	-1.23077	0.311592	-3.94996	7.81654e-05	0.00423364	2.37329
ENSMUSG00000034098	603.695	-0.591173	0.149771	-3.94719	7.90738e-05	0.00426385	2.3702
ENSMUSG00000040428	145.984	0.591311	0.149786	3.94771	7.89023e-05	0.00426385	2.3702
ENSMUSG00000032356	22031.1	0.206297	0.0523527	3.94051	8.13082e-05	0.00437463	2.35906
ENSMUSG00000053963	8525.4	-0.415689	0.10557	-3.93756	8.23152e-05	0.00441904	2.35467
ENSMUSG00000027359	233.385	0.391303	0.0995432	3.93098	8.45991e-05	0.00452263	2.34461
ENSMUSG00000045087	323.929	0.402692	0.102442	3.93093	8.46168e-05	0.00452263	2.34461
ENSMUSG00000071176	1395.19	0.39473	0.100483	3.92831	8.55463e-05	0.00456228	2.34082
ENSMUSG00000049583	14105.7	-0.247805	0.0631651	-3.92314	8.74039e-05	0.00465115	2.33244
ENSMUSG00000029120	21664.5	-0.222685	0.0568232	-3.91891	8.89516e-05	0.00472318	2.32577
ENSMUSG00000066760	353.019	0.399065	0.10198	3.91315	9.10984e-05	0.00482663	2.31636
ENSMUSG00000075296	19.7796	-1.26833	0.3245	-3.90856	9.28484e-05	0.00490865	2.30904
ENSMUSG00000072944	7.77718	2.0252	0.51826	3.90769	9.31825e-05	0.00491563	2.30842
ENSMUSG00000026463	12150.7	-0.389343	0.0996846	-3.90575	9.3933e-05	0.00494449	2.30588
ENSMUSG00000022494	2906.94	-0.356005	0.0912653	-3.90077	9.58857e-05	0.00503638	2.29788
ENSMUSG00000028019	308.36	-0.439278	0.112654	-3.89934	9.64536e-05	0.00505529	2.29625
ENSMUSG00000102222	632.542	0.356983	0.0916028	3.89708	9.73611e-05	0.00509188	2.29312
ENSMUSG00000006301	1028.69	0.268335	0.0688796	3.89571	9.79122e-05	0.00510972	2.2916
ENSMUSG00000098029	43.3361	-0.92905	0.238878	-3.88923	0.000100563	0.0052368	2.28093
ENSMUSG00000029605	27.6746	1.05566	0.271706	3.8853	0.000102203	0.00531087	2.27483
ENSMUSG00000103585	666.047	0.53938	0.138933	3.88232	0.000103466	0.00536501	2.27043
ENSMUSG00000024887	1178.53	0.354258	0.0912744	3.88124	0.000103926	0.00537741	2.26943
ENSMUSG00000067889	43850.8	-0.245363	0.0632457	-3.87952	0.000104662	0.00540401	2.26728
ENSMUSG00000032714	417.569	0.350032	0.0902647	3.87784	0.000105388	0.00542996	2.2652
ENSMUSG00000035653	6089.4	-0.237673	0.0613265	-3.87554	0.00010639	0.00546996	2.26202
ENSMUSG00000020696	506.99	0.356625	0.0920813	3.87294	0.000107531	0.005517	2.2583
ENSMUSG00000000531	1031.12	-0.477957	0.123581	-3.86757	0.000109924	0.00562787	2.24966
ENSMUSG00000018470	3713.18	0.414559	0.107213	3.86669	0.000110324	0.0056365	2.24899
ENSMUSG00000026748	2485.67	-0.242906	0.0628362	-3.86571	0.000110768	0.00564089	2.24865
ENSMUSG00000044447	801.298	0.267191	0.0691225	3.86547	0.000110874	0.00564089	2.24865
ENSMUSG00000112540	16.2239	-1.42645	0.369163	-3.86403	0.000111533	0.00566255	2.24699
ENSMUSG00000029602	1536.57	-0.462148	0.119684	-3.86141	0.000112734	0.00571162	2.24324
ENSMUSG00000034401	179.699	0.384136	0.0995254	3.85968	0.000113536	0.00574029	2.24107
ENSMUSG00000112276	43.4623	1.08456	0.281168	3.85735	0.000114621	0.00578315	2.23784
ENSMUSG00000090071	11862.8	-0.296998	0.0770194	-3.85615	0.000115187	0.00579963	2.2366
ENSMUSG00000090626	761.092	0.413268	0.107336	3.85022	0.000118014	0.00592972	2.22697
ENSMUSG00000005087	101.006	-0.528463	0.137303	-3.84888	0.000118661	0.00594994	2.22549
ENSMUSG00000034209	531.854	-0.557337	0.144827	-3.84831	0.000118938	0.00595154	2.22537
ENSMUSG00000091476	713.264	-0.396118	0.103004	-3.84565	0.000120232	0.00600397	2.22156
ENSMUSG00000054889	16.1693	1.43961	0.375102	3.83793	0.000124077	0.00618327	2.20878
ENSMUSG00000033022	568.2	-0.427275	0.111457	-3.83353	0.00012632	0.00626933	2.20278
ENSMUSG00000049112	183.623	-0.388928	0.101448	-3.83378	0.00012619	0.00626933	2.20278
ENSMUSG00000000753	249.313	-0.520712	0.136051	-3.82733	0.000129542	0.00641616	2.19272
ENSMUSG00000001506	706.981	-1.41489	0.369789	-3.8262	0.000130136	0.00641682	2.19268
ENSMUSG00000026655	245.429	-0.518573	0.135523	-3.82645	0.000130003	0.00641682	2.19268
ENSMUSG00000028931	15633.8	0.192162	0.0502345	3.8253	0.000130611	0.00641682	2.19268
ENSMUSG00000040125	19320	-0.28955	0.0756869	-3.82563	0.000130437	0.00641682	2.19268
ENSMUSG00000033249	567.012	0.337189	0.0882195	3.82216	0.000132288	0.00648609	2.18802
ENSMUSG00000022150	712.881	-0.419139	0.109687	-3.82123	0.00013279	0.00649764	2.18724
ENSMUSG00000044788	1107.18	0.292605	0.0767004	3.8149	0.000136237	0.00665291	2.17699
ENSMUSG00000072875	1033.15	-0.34287	0.0899311	-3.81259	0.000137517	0.00670198	2.1738
ENSMUSG00000042460	1142	-0.349997	0.0919364	-3.80695	0.000140694	0.00682958	2.16561
ENSMUSG00000075316	46.6197	-1.2535	0.329268	-3.80694	0.000140697	0.00682958	2.16561
ENSMUSG00000028294	82.9269	-0.612073	0.160844	-3.80538	0.000141586	0.00685902	2.16374
ENSMUSG00000103081	350.166	0.587968	0.154561	3.80413	0.000142304	0.0068801	2.16241
ENSMUSG00000031241	20.4114	-1.17221	0.308306	-3.8021	0.000143475	0.00689958	2.16118
ENSMUSG00000064372	178.453	-0.487321	0.12816	-3.80244	0.000143277	0.00689958	2.16118
ENSMUSG00000109121	270.35	-0.417599	0.109838	-3.80196	0.000143558	0.00689958	2.16118
ENSMUSG00000106799	9.51137	1.82348	0.480088	3.79822	0.000145736	0.00699046	2.15549
ENSMUSG00000024411	4635.04	-0.400266	0.105431	-3.79648	0.000146763	0.00702586	2.1533
ENSMUSG00000029471	14846.2	-0.251271	0.0662769	-3.79123	0.000149902	0.007162	2.14497
ENSMUSG00000043635	896.099	-0.321402	0.0847987	-3.79017	0.000150542	0.00717848	2.14397
ENSMUSG00000057716	15889.1	-0.233077	0.0615436	-3.7872	0.000152357	0.00725083	2.13961
ENSMUSG00000044122	51.5503	0.751109	0.198389	3.78604	0.000153067	0.0072704	2.13844
ENSMUSG00000050600	2045.22	-0.340397	0.0899439	-3.78455	0.000153986	0.00729976	2.13669
ENSMUSG00000054934	1146.24	-0.257399	0.0680439	-3.78285	0.000155046	0.00733571	2.13456
ENSMUSG00000039323	783.884	-0.333041	0.0880656	-3.78174	0.000155734	0.00735398	2.13348
ENSMUSG00000027748	1054.83	-0.252727	0.0668511	-3.78045	0.000156547	0.00737804	2.13206
ENSMUSG00000041741	204.242	-0.458323	0.121252	-3.77993	0.000156874	0.00737916	2.13199
ENSMUSG00000034755	1720.91	-0.380856	0.100882	-3.77528	0.000159828	0.0074994	2.12497
ENSMUSG00000042567	75.4242	-1.10932	0.293864	-3.77494	0.000160047	0.0074994	2.12497
ENSMUSG00000021613	1269.67	-0.404066	0.107068	-3.77392	0.000160705	0.00750949	2.12439
ENSMUSG00000045994	6848.29	-0.226434	0.0600042	-3.77364	0.00016088	0.00750949	2.12439
ENSMUSG00000113074	10.0328	1.69811	0.450302	3.77104	0.000162567	0.00757371	2.12069
ENSMUSG00000020027	1117.19	0.274732	0.0728762	3.76984	0.000163353	0.00759576	2.11943
ENSMUSG00000029090	1021.96	-0.214342	0.0569543	-3.76341	0.000167611	0.00776404	2.10991
ENSMUSG00000059361	1445.98	0.358543	0.0952685	3.7635	0.000167553	0.00776404	2.10991
ENSMUSG00000037148	1816.44	-0.192062	0.0510594	-3.76154	0.000168873	0.00780765	2.10748
ENSMUSG00000029661	885.733	-0.761065	0.202543	-3.75755	0.000171583	0.0079179	2.10139
ENSMUSG00000004626	1021.58	0.518163	0.137949	3.75621	0.000172507	0.00794088	2.10013
ENSMUSG00000078137	748.12	-0.530395	0.141217	-3.75588	0.000172734	0.00794088	2.10013
ENSMUSG00000012443	64.7525	-0.675421	0.180064	-3.751	0.000176131	0.00807401	2.09291
ENSMUSG00000056820	5464.48	-0.360894	0.096229	-3.75037	0.000176575	0.00807401	2.09291
ENSMUSG00000074896	259.221	0.530026	0.141329	3.7503	0.000176626	0.00807401	2.09291
ENSMUSG00000083744	116.026	0.745249	0.199152	3.74212	0.000182473	0.00832563	2.07958
ENSMUSG00000114479	18.135	1.25173	0.334579	3.74119	0.000183148	0.00834077	2.07879
ENSMUSG00000040009	4132.22	-0.236673	0.0634011	-3.73295	0.000189254	0.00860274	2.06536
ENSMUSG00000031441	3344.47	0.208767	0.0559382	3.73209	0.000189894	0.00861575	2.06471
ENSMUSG00000053799	2165.91	-0.351263	0.0941528	-3.73077	0.000190895	0.00864501	2.06323
ENSMUSG00000097877	169.315	0.591327	0.158555	3.72946	0.000191887	0.0086738	2.06179
ENSMUSG00000018819	119.048	0.61285	0.164425	3.72723	0.000193593	0.00872361	2.0593
ENSMUSG00000100837	53.1102	0.74755	0.200572	3.72709	0.000193706	0.00872361	2.0593
ENSMUSG00000052336	1532.05	-0.348692	0.0937043	-3.72119	0.000198287	0.0089134	2.04996
ENSMUSG00000035397	1138.01	-0.400669	0.107692	-3.72051	0.000198819	0.0089208	2.0496
ENSMUSG00000079808	4.20498	3.62854	0.975699	3.71891	0.000200083	0.00896099	2.04764
ENSMUSG00000030577	15.4433	1.39374	0.374924	3.71739	0.00020129	0.00899846	2.04583
ENSMUSG00000039470	2942.06	-0.273823	0.0737037	-3.71519	0.000203052	0.0090606	2.04284
ENSMUSG00000025213	210.026	0.567903	0.152895	3.71433	0.000203741	0.00907469	2.04217
ENSMUSG00000019843	3512.56	-0.158371	0.0426483	-3.71342	0.00020448	0.00909097	2.04139
ENSMUSG00000028259	15.8268	-1.30893	0.35277	-3.71042	0.000206915	0.0091824	2.03704
ENSMUSG00000055067	1672.01	0.301861	0.0813771	3.7094	0.000207748	0.0092026	2.03609
ENSMUSG00000032705	4353.19	-0.27439	0.0740263	-3.70665	0.000210018	0.00926603	2.03311
ENSMUSG00000034282	144.95	0.554695	0.149634	3.707	0.000209727	0.00926603	2.03311
ENSMUSG00000051703	1379.47	-0.384555	0.103758	-3.70628	0.000210323	0.00926603	2.03311
ENSMUSG00000039087	1799.07	0.558513	0.150718	3.70567	0.000210833	0.0092717	2.03284
ENSMUSG00000023828	18.226	-1.54681	0.41776	-3.70262	0.000213383	0.0093669	2.0284
ENSMUSG00000118012	188.589	0.41091	0.111005	3.70172	0.00021414	0.00938317	2.02765
ENSMUSG00000044042	6653.06	0.246619	0.0666712	3.69903	0.000216423	0.00946618	2.02383
ENSMUSG00000027210	4117.54	-0.314548	0.0851016	-3.69615	0.000218891	0.00955694	2.01968
ENSMUSG00000036915	309.84	-0.516703	0.139858	-3.69448	0.000220336	0.00960278	2.0176
ENSMUSG00000060534	1796.69	-0.408704	0.110649	-3.6937	0.000221018	0.00961528	2.01704
ENSMUSG00000038257	608.285	-0.520275	0.140973	-3.6906	0.000223727	0.00971574	2.01252
ENSMUSG00000073591	816.02	-0.330856	0.0897404	-3.68681	0.000227085	0.009844	2.00683
ENSMUSG00000016256	785.847	0.366251	0.0993583	3.68616	0.000227665	0.00985155	2.0065
ENSMUSG00000117093	138.284	-0.453582	0.123078	-3.6853	0.000228431	0.00986715	2.00581
ENSMUSG00000044770	75.2264	-0.540394	0.146738	-3.68271	0.000230768	0.00995042	2.00216
ENSMUSG00000020181	10931.8	-0.197215	0.0535642	-3.68184	0.000231555	0.00996672	2.00145
ENSMUSG00000022091	830.928	0.324019	0.0880414	3.6803	0.000232958	0.0100094	1.99959
ENSMUSG00000026630	22.7323	1.15439	0.313747	3.67936	0.000233821	0.0100288	1.99875
ENSMUSG00000020061	408.835	0.413621	0.11246	3.67793	0.000235135	0.0100673	1.99709
ENSMUSG00000002944	20.7206	-1.40485	0.382524	-3.67259	0.000240106	0.0102621	1.98876
ENSMUSG00000010175	1066.3	0.281047	0.0766902	3.66471	0.000247621	0.0105278	1.97766
ENSMUSG00000024413	3269.26	0.169186	0.0461645	3.66485	0.000247482	0.0105278	1.97766
ENSMUSG00000040037	13484.7	-0.226416	0.0617695	-3.66551	0.00024685	0.0105278	1.97766
ENSMUSG00000035891	3015.62	0.216864	0.0591949	3.66355	0.000248741	0.010539	1.9772
ENSMUSG00000042035	1192.48	-0.324624	0.0886092	-3.66354	0.000248753	0.010539	1.9772
ENSMUSG00000044548	263.196	-0.401141	0.109518	-3.66278	0.000249493	0.010552	1.97666
ENSMUSG00000047996	451.737	0.424679	0.116035	3.65993	0.000252282	0.0106515	1.97259
ENSMUSG00000020593	1553.53	0.239601	0.0655159	3.65714	0.000255046	0.010735	1.9692
ENSMUSG00000028813	40.4282	-0.81867	0.223888	-3.6566	0.000255585	0.010735	1.9692
ENSMUSG00000031012	6176.1	-0.208668	0.0570651	-3.65667	0.000255517	0.010735	1.9692
ENSMUSG00000085282	339.724	-0.410442	0.112289	-3.65524	0.000256943	0.0107735	1.96764
ENSMUSG00000029307	362.872	0.535108	0.146487	3.65295	0.000259248	0.0108514	1.96452
ENSMUSG00000049106	4519.77	-0.177951	0.0487372	-3.65124	0.000260978	0.010905	1.96237
ENSMUSG00000111360	75.5145	0.672127	0.184231	3.64828	0.000264005	0.0110126	1.95811
ENSMUSG00000024937	460.034	-0.343183	0.0941322	-3.64576	0.000266604	0.0111019	1.9546
ENSMUSG00000105966	17.3581	1.18796	0.326066	3.64331	0.000269153	0.011189	1.95121
ENSMUSG00000055972	24.2337	-0.920478	0.252845	-3.64049	0.00027212	0.011293	1.94719
ENSMUSG00000040563	4087.55	-0.24812	0.0681908	-3.63861	0.00027411	0.0113369	1.94551
ENSMUSG00000053783	48.5796	-0.88581	0.243424	-3.63896	0.000273738	0.0113369	1.94551
ENSMUSG00000071379	466.392	-0.590439	0.162326	-3.63736	0.000275446	0.0113728	1.94413
ENSMUSG00000031613	141.784	-0.553502	0.152271	-3.63499	0.000277993	0.0114585	1.94087
ENSMUSG00000048281	115.98	-0.521573	0.143522	-3.63408	0.000278969	0.0114793	1.94009
ENSMUSG00000099375	13.6362	1.36636	0.376468	3.62943	0.000284048	0.0116685	1.93298
ENSMUSG00000070348	1999.39	-0.450696	0.124258	-3.62709	0.000286635	0.0117549	1.92978
ENSMUSG00000030236	26.6359	-1.41177	0.389328	-3.62616	0.000287662	0.0117772	1.92896
ENSMUSG00000030729	32370.1	-0.304173	0.0839037	-3.62526	0.000288673	0.0117987	1.92816
ENSMUSG00000105152	91.4282	-0.668511	0.184445	-3.62445	0.000289577	0.0118158	1.92754
ENSMUSG00000113725	5.40597	2.71962	0.75059	3.62331	0.000290854	0.011848	1.92635
ENSMUSG00000051136	5.8747	2.80626	0.775227	3.61992	0.000294694	0.0119844	1.92138
ENSMUSG00000118154	89.5871	0.766129	0.211905	3.61543	0.000299846	0.0121735	1.91458
ENSMUSG00000030789	11.7562	1.45743	0.403483	3.61213	0.000303695	0.0123093	1.90977
ENSMUSG00000109770	22.86	-0.980732	0.27159	-3.61107	0.000304932	0.0123388	1.90873
ENSMUSG00000117767	18.0427	-1.12849	0.312565	-3.61041	0.000305708	0.0123497	1.90834
ENSMUSG00000105265	1019.99	0.41758	0.115688	3.60953	0.000306753	0.0123714	1.90758
ENSMUSG00000029084	126.328	-0.537348	0.148935	-3.60795	0.00030863	0.0124059	1.90637
ENSMUSG00000047907	1537.17	0.368003	0.101992	3.60815	0.00030839	0.0124059	1.90637
ENSMUSG00000015112	124.48	0.489868	0.13586	3.60568	0.000311343	0.0124943	1.90329
ENSMUSG00000027820	423.15	-0.381802	0.105907	-3.60506	0.000312084	0.0125034	1.90297
ENSMUSG00000052565	385.041	-0.579983	0.160943	-3.60365	0.000313774	0.0125298	1.90205
ENSMUSG00000074748	6345.42	-0.26577	0.0737435	-3.60398	0.000313386	0.0125298	1.90205
ENSMUSG00000042498	19.1365	-1.08679	0.301751	-3.60161	0.000316249	0.012608	1.89936
ENSMUSG00000040339	1433.08	-0.367534	0.102093	-3.6	0.000318212	0.0126654	1.89738
ENSMUSG00000068735	1667.6	-0.38347	0.106539	-3.59934	0.000319021	0.0126769	1.89699
ENSMUSG00000036334	158.162	-0.443876	0.123436	-3.59601	0.000323138	0.0128196	1.89213
ENSMUSG00000034164	85.6006	-0.616025	0.171452	-3.59298	0.000326916	0.0129273	1.88849
ENSMUSG00000097596	550.757	0.475238	0.132254	3.59339	0.000326409	0.0129273	1.88849
ENSMUSG00000024109	44134.7	-0.147397	0.0411137	-3.5851	0.000336948	0.0132513	1.87774
ENSMUSG00000043013	8.80175	2.45894	0.685907	3.58495	0.000337142	0.0132513	1.87774
ENSMUSG00000048440	159.787	0.427309	0.119181	3.58539	0.00033658	0.0132513	1.87774
ENSMUSG00000078853	247.351	0.479995	0.133896	3.58484	0.000337289	0.0132513	1.87774
ENSMUSG00000044949	826.011	-0.322803	0.0900789	-3.58356	0.000338941	0.0132947	1.87632
ENSMUSG00000033350	5924.23	-0.256109	0.0715246	-3.58071	0.000342665	0.0134191	1.87228
ENSMUSG00000027296	3232.78	-0.297721	0.0832414	-3.57659	0.000348102	0.0136101	1.86614
ENSMUSG00000020889	4741.74	0.267852	0.0749499	3.57375	0.000351907	0.0137368	1.86211
ENSMUSG00000028957	3415.03	0.313766	0.0878122	3.57315	0.00035271	0.0137461	1.86182
ENSMUSG00000048644	6338.79	-0.39425	0.11055	-3.56626	0.000362113	0.01409	1.85109
ENSMUSG00000004952	223.638	0.512913	0.143917	3.56395	0.000365321	0.0141858	1.84815
ENSMUSG00000033006	859.542	0.389038	0.109169	3.56364	0.000365743	0.0141858	1.84815
ENSMUSG00000005547	6.96404	-2.57515	0.723582	-3.55888	0.000372433	0.0144223	1.84097
ENSMUSG00000027796	1040.72	0.253091	0.0711972	3.55479	0.000378275	0.0146252	1.8349
ENSMUSG00000052560	1068.54	-0.270244	0.0760338	-3.55426	0.000379043	0.0146317	1.83471
ENSMUSG00000060227	5364.26	-0.162396	0.0457012	-3.55343	0.000380236	0.0146545	1.83403
ENSMUSG00000036469	1795.69	-0.346145	0.097604	-3.54642	0.000390497	0.0150261	1.82315
ENSMUSG00000051615	4344.37	-0.240122	0.0678007	-3.54158	0.000397731	0.0152803	1.81587
ENSMUSG00000038534	532.909	0.367307	0.103734	3.54087	0.000398807	0.0152975	1.81538
ENSMUSG00000026179	5728.32	0.218074	0.061623	3.53884	0.000401896	0.0153917	1.81271
ENSMUSG00000071847	735.917	-0.383006	0.108428	-3.53234	0.000411892	0.0157497	1.80273
ENSMUSG00000021180	1439.04	0.335324	0.0949625	3.53112	0.0004138	0.0157978	1.8014
ENSMUSG00000005360	17547.2	-0.293517	0.0831486	-3.53003	0.000415507	0.0158381	1.8003
ENSMUSG00000058624	10903.8	-0.360693	0.102306	-3.52564	0.000422466	0.0160782	1.79376
ENSMUSG00000033676	16456.3	-0.234176	0.0665118	-3.52082	0.000430214	0.0163474	1.78655
ENSMUSG00000032523	463.184	0.279236	0.0793329	3.5198	0.00043188	0.0163852	1.78555
ENSMUSG00000034612	2104.39	-0.305453	0.0868045	-3.51887	0.000433397	0.0164171	1.7847
ENSMUSG00000048015	38.9827	-0.883776	0.251384	-3.51564	0.000438691	0.0165918	1.78011
ENSMUSG00000031385	797.925	0.425998	0.12174	3.49925	0.000466573	0.0175916	1.75469
ENSMUSG00000026605	27.6102	-1.00632	0.288384	-3.4895	0.000483926	0.0182176	1.73951
ENSMUSG00000026827	4838.92	-0.321672	0.0921964	-3.48898	0.000484865	0.0182248	1.73934
ENSMUSG00000027358	135.254	-0.529955	0.151945	-3.48781	0.000487001	0.0182768	1.7381
ENSMUSG00000005506	14009.6	-0.14905	0.0427497	-3.48656	0.000489268	0.0182807	1.73801
ENSMUSG00000034413	3609.34	-0.264666	0.0759114	-3.48651	0.00048936	0.0182807	1.73801
ENSMUSG00000036206	632.067	-0.314124	0.0900913	-3.48673	0.000488968	0.0182807	1.73801
ENSMUSG00000031995	16.1203	1.14938	0.329819	3.48489	0.000492348	0.018336	1.7367
ENSMUSG00000065987	9.34678	2.13521	0.612647	3.48522	0.000491729	0.018336	1.7367
ENSMUSG00000051726	4415.54	-0.323541	0.092885	-3.48324	0.000495375	0.0184205	1.7347
ENSMUSG00000005338	18238	-0.193032	0.0554736	-3.4797	0.000501972	0.0186373	1.72962
ENSMUSG00000111971	12.6539	-1.38386	0.39782	-3.47862	0.000504001	0.0186841	1.72853
ENSMUSG00000004383	7531.05	-0.26669	0.0766793	-3.478	0.000505169	0.0186989	1.72818
ENSMUSG00000030739	930.006	0.350078	0.100712	3.47603	0.000508887	0.0188079	1.72566
ENSMUSG00000024772	897.79	-0.222033	0.0639304	-3.47304	0.000514595	0.01899	1.72147
ENSMUSG00000040022	3651.08	-0.203559	0.0586267	-3.47211	0.000516381	0.0190271	1.72063
ENSMUSG00000045777	394.218	0.290822	0.0837791	3.47129	0.000517958	0.0190563	1.71996
ENSMUSG00000005397	548.492	-0.463875	0.13365	-3.47082	0.000518873	0.0190611	1.71985
ENSMUSG00000029878	4573.31	-0.255108	0.0735941	-3.46642	0.000527431	0.0193463	1.7134
ENSMUSG00000025592	38.2891	0.776465	0.224095	3.46489	0.000530454	0.0193907	1.71241
ENSMUSG00000041624	3199.35	-0.197989	0.0571361	-3.46522	0.000529798	0.0193907	1.71241
ENSMUSG00000069911	35.1953	-0.881257	0.254361	-3.46459	0.000531032	0.0193907	1.71241
ENSMUSG00000021720	652.183	-0.279983	0.0808315	-3.46379	0.000532624	0.0194196	1.71176
ENSMUSG00000018334	2225.16	0.249905	0.0722396	3.45939	0.000541395	0.0197098	1.70532
ENSMUSG00000095334	46.7626	0.792205	0.229051	3.45863	0.000542925	0.019736	1.70474
ENSMUSG00000059791	56.757	-0.618962	0.179046	-3.45701	0.000546212	0.0198259	1.70277
ENSMUSG00000104244	8.23066	1.72779	0.499898	3.45629	0.000547665	0.019849	1.70226
ENSMUSG00000029098	1588.76	0.253348	0.0733144	3.45563	0.000549004	0.0198679	1.70185
ENSMUSG00000033420	1367.79	0.331818	0.0960549	3.45446	0.0005514	0.0198954	1.70125
ENSMUSG00000035429	54.1564	0.732452	0.212013	3.45475	0.000550799	0.0198954	1.70125
ENSMUSG00000039452	111.24	0.603853	0.174914	3.45228	0.000555865	0.0200268	1.69839
ENSMUSG00000022519	272.877	-0.448422	0.129912	-3.45174	0.00055698	0.0200373	1.69816
ENSMUSG00000041431	110.655	-1.01137	0.293103	-3.45057	0.0005594	0.0200946	1.69692
ENSMUSG00000057722	298.586	-0.372183	0.107994	-3.44632	0.000568281	0.0203835	1.69072
ENSMUSG00000021047	4530.75	0.22827	0.0663122	3.44235	0.000576683	0.0206544	1.68499
ENSMUSG00000055540	2885.08	-0.295042	0.0857505	-3.44071	0.0005802	0.0207498	1.68299
ENSMUSG00000060402	463.412	0.318952	0.0927167	3.44008	0.000581553	0.0207677	1.68261
ENSMUSG00000039081	96.3219	0.583462	0.169668	3.43885	0.000584201	0.0208316	1.68128
ENSMUSG00000024990	277.906	-0.517008	0.150411	-3.43731	0.000587531	0.0208891	1.68008
ENSMUSG00000087301	328.131	0.335064	0.0974723	3.43753	0.000587037	0.0208891	1.68008
ENSMUSG00000029581	6513.89	-0.323351	0.09416	-3.43406	0.000594619	0.0211103	1.67551
ENSMUSG00000032338	140.075	-0.477947	0.139246	-3.43238	0.000598304	0.0212101	1.67346
ENSMUSG00000020905	148.453	-0.870154	0.25355	-3.43189	0.000599393	0.0212178	1.6733
ENSMUSG00000075031	53.4512	-0.834581	0.243266	-3.43074	0.000601938	0.0212769	1.67209
ENSMUSG00000040950	14.6273	-1.54602	0.451327	-3.42551	0.000613648	0.0216594	1.66435
ENSMUSG00000040183	1489.3	-0.527731	0.154237	-3.42156	0.000622639	0.0219449	1.65867
ENSMUSG00000031274	190.751	-0.495747	0.144931	-3.42056	0.000624915	0.0219932	1.65771
ENSMUSG00000102753	207.663	-0.427148	0.125014	-3.41681	0.000633601	0.0222345	1.65297
ENSMUSG00000104973	166.356	0.50151	0.146841	3.41533	0.000637045	0.0223232	1.65124
ENSMUSG00000029802	812.672	-0.295378	0.0864989	-3.41481	0.000638255	0.0223334	1.65104
ENSMUSG00000022715	31.7476	-0.912433	0.267237	-3.41432	0.000639421	0.0223354	1.65101
ENSMUSG00000104901	225.629	0.599362	0.17556	3.41401	0.000640148	0.0223354	1.65101
ENSMUSG00000036641	894.121	-0.328038	0.0961449	-3.41191	0.000645095	0.0224757	1.64829
ENSMUSG00000020589	12598.9	-0.296145	0.0868958	-3.40805	0.000654301	0.0227639	1.64275
ENSMUSG00000020886	27320.5	-0.255378	0.0749428	-3.40764	0.000655283	0.0227655	1.64272
ENSMUSG00000097754	15.9975	1.21248	0.355974	3.4061	0.000658978	0.0228612	1.6409
ENSMUSG00000053228	13.2112	1.38427	0.40657	3.40475	0.000662242	0.0229417	1.63937
ENSMUSG00000026640	13218	-0.192784	0.0566511	-3.403	0.000666495	0.0229908	1.63845
ENSMUSG00000069227	4403.21	-0.192694	0.0566201	-3.40328	0.000665819	0.0229908	1.63845
ENSMUSG00000079070	6.38359	1.98889	0.584445	3.40303	0.000666425	0.0229908	1.63845
ENSMUSG00000026841	197.613	-0.394017	0.115835	-3.40152	0.000670111	0.0230828	1.63671
ENSMUSG00000102232	199.101	0.523873	0.154035	3.40099	0.000671411	0.0230948	1.63649
ENSMUSG00000052920	1112.4	-0.262605	0.0772944	-3.39746	0.000680134	0.0233618	1.63149
ENSMUSG00000017132	2341.23	0.190114	0.0559666	3.39692	0.000681495	0.0233756	1.63124
ENSMUSG00000007207	7560.78	-0.235183	0.069326	-3.39242	0.000692777	0.0237291	1.62472
ENSMUSG00000081683	58.3386	-0.701305	0.206816	-3.39097	0.000696462	0.0238217	1.62303
ENSMUSG00000039328	118.148	-0.558307	0.164831	-3.38714	0.000706245	0.0241224	1.61758
ENSMUSG00000019359	84.1047	-0.480418	0.141864	-3.38647	0.000707985	0.0241479	1.61712
ENSMUSG00000026571	4007.8	-0.175926	0.0519825	-3.38434	0.000713491	0.0243017	1.61436
ENSMUSG00000028943	135.216	0.49195	0.14545	3.38226	0.000718933	0.0244528	1.61167
ENSMUSG00000027967	10.7408	-1.44151	0.426429	-3.38043	0.000723724	0.0245814	1.60939
ENSMUSG00000039542	13325.8	-0.25017	0.0741454	-3.37405	0.000740716	0.0251234	1.59992
ENSMUSG00000026188	696.942	-0.227748	0.0675636	-3.37087	0.000749325	0.0253553	1.59593
ENSMUSG00000037469	33.4055	0.930375	0.276014	3.37075	0.00074964	0.0253553	1.59593
ENSMUSG00000111069	14.621	1.21877	0.361681	3.36975	0.000752363	0.0254121	1.59496
ENSMUSG00000039904	1457.79	0.401225	0.119097	3.36888	0.000754744	0.0254572	1.59419
ENSMUSG00000103800	162.95	0.438395	0.130176	3.3677	0.000757986	0.0255311	1.59293
ENSMUSG00000006127	1483.15	0.216395	0.0642947	3.36568	0.000763558	0.0256832	1.59035
ENSMUSG00000015843	48.4633	-0.870405	0.259221	-3.35777	0.000785744	0.026393	1.57851
ENSMUSG00000052372	3785.08	-0.247417	0.0737072	-3.35676	0.000788628	0.0264533	1.57752
ENSMUSG00000021732	214.107	-0.513937	0.153201	-3.35467	0.000794603	0.026617	1.57484
ENSMUSG00000031382	220.592	0.54298	0.1621	3.34965	0.000809129	0.0270292	1.56817
ENSMUSG00000052681	2388.63	-0.290451	0.0867107	-3.34965	0.000809131	0.0270292	1.56817
ENSMUSG00000021065	2873.6	-0.182479	0.0544926	-3.3487	0.000811921	0.0270481	1.56786
ENSMUSG00000027318	452.381	0.701439	0.209443	3.34908	0.000810817	0.0270481	1.56786
ENSMUSG00000016487	1886.18	-0.229718	0.0686494	-3.34624	0.000819149	0.0272516	1.56461
ENSMUSG00000026812	4789.78	0.164449	0.0491512	3.34577	0.000820532	0.0272603	1.56447
ENSMUSG00000039089	1665.06	-0.265153	0.0792927	-3.34398	0.000825848	0.0273621	1.56285
ENSMUSG00000062542	232.117	-0.473029	0.141443	-3.34432	0.000824854	0.0273621	1.56285
ENSMUSG00000022558	3828.37	0.232787	0.0696298	3.34321	0.000828153	0.0273753	1.56264
ENSMUSG00000058589	15781.4	-0.169294	0.0506399	-3.34309	0.000828499	0.0273753	1.56264
ENSMUSG00000097929	220.332	-0.426457	0.127611	-3.34184	0.000832237	0.0274616	1.56127
ENSMUSG00000063446	171.819	-0.617801	0.184899	-3.34128	0.000833929	0.0274801	1.56098
ENSMUSG00000007613	1549.29	-0.269498	0.0806795	-3.34036	0.00083671	0.0275344	1.56012
ENSMUSG00000035274	387.333	-0.73144	0.219033	-3.33941	0.000839574	0.0275541	1.55981
ENSMUSG00000063458	33.5651	0.895211	0.268065	3.33953	0.000839189	0.0275541	1.55981
ENSMUSG00000045027	22.0048	-0.956856	0.287069	-3.33319	0.000858555	0.0281391	1.55069
ENSMUSG00000022665	251.776	-0.454126	0.136273	-3.33247	0.000860802	0.0281748	1.55014
ENSMUSG00000097801	152.642	0.386841	0.116099	3.33198	0.000862313	0.0281863	1.54996
ENSMUSG00000034235	3456.42	0.259484	0.0779792	3.32761	0.000875936	0.0285931	1.54374
ENSMUSG00000114442	44.6252	0.644652	0.19384	3.32569	0.000881992	0.0287522	1.54133
ENSMUSG00000105011	116.335	-0.611693	0.184069	-3.32317	0.000890014	0.0289749	1.53798
ENSMUSG00000034997	2579.77	-0.434008	0.130666	-3.3215	0.000895345	0.0291095	1.53597
ENSMUSG00000033949	207.885	0.431915	0.130086	3.32022	0.000899467	0.0292045	1.53455
ENSMUSG00000055761	264.116	-0.420832	0.126914	-3.31588	0.000913545	0.029622	1.52839
ENSMUSG00000028710	1792.85	0.201857	0.0608855	3.31535	0.000915287	0.029639	1.52814
ENSMUSG00000105703	180.282	-0.834554	0.25194	-3.31252	0.000924601	0.0299008	1.52432
ENSMUSG00000051111	3106.87	0.285433	0.0862453	3.30955	0.00093446	0.0301795	1.52029
ENSMUSG00000029231	1854.21	-0.302536	0.0914969	-3.30652	0.000944641	0.0304678	1.51616
ENSMUSG00000059854	31.0945	-0.809629	0.245014	-3.30441	0.000951748	0.0306564	1.51348
ENSMUSG00000021536	8380.43	-0.204553	0.0619849	-3.30005	0.000966692	0.0310554	1.50786
ENSMUSG00000031170	98.1447	-0.551344	0.167064	-3.30019	0.000966195	0.0310554	1.50786
ENSMUSG00000041911	485.876	0.265069	0.0803576	3.29862	0.000971622	0.0311726	1.50623
ENSMUSG00000049265	1255.26	0.211898	0.0642727	3.29687	0.000977704	0.0313265	1.50409
ENSMUSG00000015143	3633.11	-0.298677	0.0906189	-3.29596	0.000980846	0.0313446	1.50384
ENSMUSG00000040852	931.745	0.373725	0.113384	3.29609	0.000980407	0.0313446	1.50384
ENSMUSG00000029838	7837.63	-0.306392	0.0930005	-3.29452	0.000985913	0.0314651	1.50217
ENSMUSG00000046447	71505.3	-0.292891	0.0889611	-3.29235	0.000993541	0.0315842	1.50053
ENSMUSG00000085837	72.3226	-0.568001	0.172512	-3.29253	0.000992891	0.0315842	1.50053
ENSMUSG00000111110	53.3303	0.987812	0.300022	3.29247	0.000993123	0.0315842	1.50053
ENSMUSG00000102729	240.353	-0.364102	0.11064	-3.29086	0.000998818	0.0317105	1.4988
ENSMUSG00000026712	385.662	-0.578563	0.175846	-3.29018	0.00100124	0.0317296	1.49854
ENSMUSG00000109744	254.473	0.387286	0.117718	3.28996	0.00100203	0.0317296	1.49854
ENSMUSG00000032908	1413.56	0.264277	0.0803843	3.28767	0.00101019	0.0319466	1.49558
ENSMUSG00000025758	256.964	-0.327988	0.0998405	-3.28512	0.00101939	0.0321954	1.49221
ENSMUSG00000001870	720.499	-0.207364	0.0631468	-3.28385	0.001024	0.0322157	1.49193
ENSMUSG00000048120	707.5	-0.334783	0.101941	-3.28409	0.00102311	0.0322157	1.49193
ENSMUSG00000060371	9010.26	-0.205331	0.0625229	-3.28409	0.00102312	0.0322157	1.49193
ENSMUSG00000035354	2366.57	0.165123	0.0503157	3.28175	0.00103165	0.0324142	1.48926
ENSMUSG00000039849	1884.13	0.188113	0.0573568	3.2797	0.00103919	0.0326092	1.48666
ENSMUSG00000008763	10407.7	-0.24071	0.0734156	-3.27873	0.00104274	0.0326364	1.4863
ENSMUSG00000036712	8373.83	-0.215817	0.0658263	-3.27858	0.0010433	0.0326364	1.4863
ENSMUSG00000078122	25.99	-1.02722	0.313331	-3.27837	0.00104409	0.0326364	1.4863
ENSMUSG00000003420	364.518	-0.320356	0.0977775	-3.27638	0.00105148	0.0327059	1.48537
ENSMUSG00000004187	14776.4	0.210337	0.0641991	3.27632	0.00105169	0.0327059	1.48537
ENSMUSG00000063873	4553.28	-0.16383	0.0500011	-3.27653	0.0010509	0.0327059	1.48537
ENSMUSG00000075415	6564.39	0.325783	0.0994132	3.27706	0.00104894	0.0327059	1.48537
ENSMUSG00000036882	4075.52	-0.36492	0.111424	-3.27505	0.00105644	0.0327908	1.48425
ENSMUSG00000053399	133.108	-0.556325	0.169877	-3.27487	0.00105712	0.0327908	1.48425
ENSMUSG00000040717	226.172	-0.46333	0.141511	-3.27417	0.00105973	0.0328044	1.48407
ENSMUSG00000091455	21.9793	-0.892985	0.272748	-3.27403	0.00106025	0.0328044	1.48407
ENSMUSG00000086003	61.6847	0.602991	0.184202	3.27353	0.00106214	0.0328209	1.48385
ENSMUSG00000065499	74.0056	0.638426	0.195072	3.27277	0.001065	0.0328678	1.48323
ENSMUSG00000037824	1533.04	-0.279782	0.0854997	-3.27231	0.00106672	0.0328789	1.48308
ENSMUSG00000021057	7416.97	-0.29463	0.0900985	-3.27009	0.00107514	0.0330967	1.48022
ENSMUSG00000059003	39524	-0.176172	0.0538856	-3.26937	0.00107786	0.0331384	1.47967
ENSMUSG00000064080	251.863	0.454936	0.139183	3.26863	0.00108071	0.033184	1.47907
ENSMUSG00000029287	839.498	0.235725	0.0721373	3.26772	0.00108418	0.0332067	1.47877
ENSMUSG00000074001	171.433	0.440823	0.134891	3.268	0.00108312	0.0332067	1.47877
ENSMUSG00000118280	33.4269	0.74403	0.227717	3.26734	0.00108563	0.0332093	1.47874
ENSMUSG00000056413	4205.78	-0.158142	0.0484181	-3.26618	0.00109009	0.0333039	1.4775
ENSMUSG00000035948	86.1923	0.552693	0.169339	3.26383	0.00109918	0.0334975	1.47499
ENSMUSG00000097814	419.846	-0.257632	0.0789339	-3.26389	0.00109893	0.0334975	1.47499
ENSMUSG00000078350	283.862	0.319793	0.0980778	3.2606	0.00111175	0.0338381	1.47059
ENSMUSG00000003746	1681.81	-0.324182	0.0994828	-3.25868	0.00111934	0.0340264	1.46818
ENSMUSG00000038879	416.773	0.38385	0.117818	3.25799	0.00112204	0.0340661	1.46768
ENSMUSG00000034919	17.9731	-1.01356	0.311514	-3.25366	0.00113928	0.0345462	1.4616
ENSMUSG00000109587	5.75611	-2.00983	0.61822	-3.25099	0.00115004	0.0348292	1.45806
ENSMUSG00000022661	2261.6	-0.310382	0.0954995	-3.25009	0.0011537	0.0348531	1.45776
ENSMUSG00000035486	409.259	-0.397716	0.122362	-3.25031	0.0011528	0.0348531	1.45776
ENSMUSG00000028971	133.846	0.633437	0.195137	3.24612	0.0011699	0.0352947	1.45229
ENSMUSG00000105909	11.4162	-1.46739	0.452088	-3.2458	0.00117122	0.0352947	1.45229
ENSMUSG00000061576	8746.18	-0.163604	0.0504196	-3.24485	0.00117513	0.0353687	1.45138
ENSMUSG00000031937	327.819	0.311451	0.0960408	3.24291	0.00118316	0.0355666	1.44896
ENSMUSG00000035172	389.953	0.265811	0.0819779	3.24247	0.00118498	0.0355773	1.44883
ENSMUSG00000111631	7.6247	1.66935	0.515025	3.2413	0.00118987	0.035678	1.4476
ENSMUSG00002076474	14.5231	1.19881	0.369894	3.24096	0.00119127	0.035678	1.4476
ENSMUSG00000027864	3016.63	-0.291342	0.0899921	-3.23741	0.00120618	0.0360135	1.44353
ENSMUSG00000080885	16.2247	-1.22646	0.378818	-3.23761	0.00120535	0.0360135	1.44353
ENSMUSG00000116480	35.6511	0.828254	0.255852	3.23724	0.00120692	0.0360135	1.44353
ENSMUSG00000001943	128.327	0.499041	0.154331	3.23359	0.00122247	0.0364328	1.43851
ENSMUSG00000112597	32.1485	0.876871	0.271212	3.23316	0.00122429	0.0364424	1.43839
ENSMUSG00000092021	32.2336	0.780145	0.241374	3.2321	0.00122883	0.0365328	1.43732
ENSMUSG00000039552	39.5704	-0.712449	0.220627	-3.2292	0.00124139	0.0368612	1.43343
ENSMUSG00000060843	156.49	0.369574	0.114508	3.22749	0.00124882	0.0370368	1.43137
ENSMUSG00000020846	434.197	-0.482072	0.149415	-3.2264	0.0012536	0.0370429	1.43129
ENSMUSG00000039735	8376.94	-0.281384	0.0872023	-3.22679	0.00125186	0.0370429	1.43129
ENSMUSG00000102748	664.143	0.306469	0.0949791	3.2267	0.00125227	0.0370429	1.43129
ENSMUSG00000024855	3150.5	-0.157358	0.0488125	-3.22371	0.0012654	0.0373009	1.42828
ENSMUSG00000032570	8434.61	-0.156297	0.0484828	-3.22377	0.00126517	0.0373009	1.42828
ENSMUSG00000053080	1518.51	-0.277295	0.0860619	-3.22205	0.00127278	0.0374731	1.42628
ENSMUSG00000051401	6052.31	-0.189488	0.0589056	-3.21681	0.00129624	0.0381177	1.41887
ENSMUSG00000048029	109.413	0.417094	0.129725	3.21521	0.00130349	0.0382845	1.41698
ENSMUSG00000023908	137.683	0.450955	0.140389	3.21218	0.00131734	0.0386446	1.41291
ENSMUSG00000064308	28.5383	0.859542	0.267619	3.21181	0.00131901	0.038647	1.41288
ENSMUSG00000036155	8886.81	-0.182254	0.0567602	-3.21096	0.00132294	0.0386689	1.41264
ENSMUSG00000048001	138.017	-0.633667	0.197335	-3.21112	0.00132217	0.0386689	1.41264
ENSMUSG00000053004	575.027	-0.368387	0.114771	-3.20977	0.00132843	0.0387827	1.41136
ENSMUSG00000040483	233.712	0.454073	0.141521	3.20851	0.00133424	0.0389058	1.40999
ENSMUSG00000027173	38.5243	0.750908	0.234062	3.20816	0.00133586	0.0389064	1.40998
ENSMUSG00000030847	317.621	0.361823	0.112815	3.20722	0.00134025	0.0389875	1.40907
ENSMUSG00000118866	174.72	-2.14504	0.668999	-3.20634	0.00134435	0.03906	1.40827
ENSMUSG00000021134	8030.75	0.160041	0.0499938	3.20121	0.00136851	0.0397145	1.40105
ENSMUSG00000108218	49.0572	0.654096	0.204448	3.19933	0.00137746	0.0399266	1.39874
ENSMUSG00000041710	819.291	-0.337195	0.10541	-3.19888	0.00137963	0.0399418	1.39857
ENSMUSG00000072964	2396.87	-0.226995	0.0709942	-3.19737	0.00138688	0.0401041	1.39681
ENSMUSG00000045934	345.928	0.321417	0.100689	3.19218	0.00141202	0.0407826	1.38953
ENSMUSG00000038354	372.022	0.259213	0.0812219	3.19142	0.00141577	0.0408425	1.38889
ENSMUSG00000004698	3672.05	-0.266165	0.0834948	-3.1878	0.00143359	0.0413073	1.38397
ENSMUSG00000106361	4.33237	3.16579	0.993331	3.18704	0.00143735	0.0413667	1.38335
ENSMUSG00000055172	207.517	0.450714	0.141485	3.18561	0.0014445	0.0415233	1.38171
ENSMUSG00000060716	1194.67	0.407188	0.127835	3.18526	0.00144622	0.0415239	1.3817
ENSMUSG00000023249	178.61	0.437718	0.13746	3.18432	0.00145093	0.0416099	1.3808
ENSMUSG00000105422	25.7533	0.966128	0.303643	3.18179	0.00146367	0.0419256	1.37752
ENSMUSG00000037143	110.785	-0.416679	0.131027	-3.18011	0.00147219	0.0421202	1.37551
ENSMUSG00000026389	213.9	-0.440299	0.138483	-3.17946	0.00147551	0.0421656	1.37504
ENSMUSG00000050069	694.039	-0.351011	0.110434	-3.17847	0.00148056	0.0422603	1.37407
ENSMUSG00000085667	273.762	0.421632	0.132706	3.1772	0.00148706	0.042396	1.37268
ENSMUSG00000020151	821.616	-0.275253	0.0866827	-3.1754	0.00149629	0.0426092	1.3705
ENSMUSG00000089941	71.1256	0.595177	0.187483	3.17456	0.00150066	0.0426836	1.36974
ENSMUSG00000037833	239.791	-0.635795	0.200399	-3.17265	0.00151057	0.0428652	1.3679
ENSMUSG00000090675	28.0336	1.07575	0.339052	3.17283	0.00150962	0.0428652	1.3679
ENSMUSG00000068252	6.59543	1.78895	0.563977	3.17203	0.00151378	0.0429062	1.36748
ENSMUSG00000007279	44.1574	0.776314	0.244864	3.17038	0.00152239	0.0430817	1.36571
ENSMUSG00000072720	76.8931	-0.612635	0.19325	-3.17017	0.00152351	0.0430817	1.36571
ENSMUSG00000015202	148.606	-0.391105	0.123445	-3.16826	0.00153355	0.043265	1.36386
ENSMUSG00000030866	5.46004	1.91462	0.604302	3.16832	0.00153325	0.043265	1.36386
ENSMUSG00002075066	12.9669	1.28381	0.405736	3.16414	0.0015554	0.0438304	1.35822
ENSMUSG00000051497	1318.79	0.261854	0.0827799	3.16325	0.00156018	0.0439142	1.35739
ENSMUSG00000022505	574.945	-0.399127	0.126231	-3.16188	0.00156754	0.0439464	1.35708
ENSMUSG00000048376	174.527	-0.356631	0.112797	-3.16169	0.00156855	0.0439464	1.35708
ENSMUSG00000051182	4.06724	2.42105	0.765688	3.16193	0.00156727	0.0439464	1.35708
ENSMUSG00000087475	331.134	-0.283361	0.0895953	-3.16267	0.00156327	0.0439464	1.35708
ENSMUSG00000023279	12.138	-1.29983	0.411308	-3.16024	0.00157639	0.0440647	1.35591
ENSMUSG00000038147	156.265	0.36346	0.115004	3.1604	0.00157553	0.0440647	1.35591
ENSMUSG00000019996	4516.37	0.264846	0.0838275	3.15942	0.00158086	0.0441389	1.35518
ENSMUSG00000029016	4007.58	0.182941	0.0579107	3.15903	0.00158297	0.0441471	1.3551
ENSMUSG00000025357	509.627	0.329193	0.104254	3.1576	0.00159075	0.0441633	1.35494
ENSMUSG00000039114	7481.86	-0.314551	0.0996031	-3.15804	0.00158832	0.0441633	1.35494
ENSMUSG00000053297	936.88	0.246028	0.0779164	3.15759	0.00159082	0.0441633	1.35494
ENSMUSG00000101337	144.396	-0.40933	0.129632	-3.15764	0.00159051	0.0441633	1.35494
ENSMUSG00000025425	4367.38	-0.320899	0.101642	-3.15716	0.00159313	0.0441771	1.3548
ENSMUSG00000052921	676.689	0.312366	0.098979	3.15588	0.00160014	0.0443211	1.35339
ENSMUSG00000112358	522.393	0.45849	0.145548	3.1501	0.00163214	0.0451558	1.34529
ENSMUSG00000086655	28.8861	0.798282	0.25348	3.14929	0.0016367	0.0452306	1.34457
ENSMUSG00000045733	5433.28	-0.31299	0.0994015	-3.14875	0.00163972	0.0452625	1.34426
ENSMUSG00000020836	1978.25	0.561855	0.17851	3.14747	0.00164692	0.0453906	1.34303
ENSMUSG00000054150	133.71	0.376472	0.119619	3.14726	0.00164809	0.0453906	1.34303
ENSMUSG00000034714	1160.94	0.343598	0.109218	3.146	0.00165521	0.0455352	1.34165
ENSMUSG00000035112	144.643	0.522826	0.166246	3.14489	0.00166152	0.045657	1.34049
ENSMUSG00000040146	119.329	0.445323	0.141679	3.14317	0.00167129	0.0458736	1.33844
ENSMUSG00000012609	3436.29	0.211051	0.0671894	3.14113	0.00168297	0.0461421	1.3359
ENSMUSG00000036894	2645.81	-0.282832	0.0901286	-3.1381	0.00170047	0.0465695	1.3319
ENSMUSG00000022176	55.0947	-0.680715	0.217061	-3.13605	0.00171241	0.0467353	1.33036
ENSMUSG00000031497	72.2216	0.465809	0.148516	3.13642	0.00171021	0.0467353	1.33036
ENSMUSG00000054986	8.84379	-1.97517	0.629857	-3.1359	0.00171328	0.0467353	1.33036
ENSMUSG00000108865	12.3381	1.36349	0.434868	3.13541	0.00171613	0.0467353	1.33036
ENSMUSG00000114851	106.673	0.407007	0.129796	3.13574	0.00171422	0.0467353	1.33036
ENSMUSG00000003948	5977.28	-0.282668	0.0901981	-3.13386	0.00172522	0.0468812	1.329
ENSMUSG00000100303	286.232	-0.356589	0.113787	-3.13384	0.00172535	0.0468812	1.329
ENSMUSG00000031494	21.8985	1.13561	0.362582	3.13201	0.00173613	0.0471217	1.32678
ENSMUSG00000050640	1100.78	-0.239021	0.0763275	-3.13152	0.00173902	0.0471475	1.32654
ENSMUSG00000074634	626.622	0.47179	0.15081	3.12837	0.00175782	0.0476039	1.32236
ENSMUSG00000041235	1090.95	0.312917	0.100055	3.12745	0.00176331	0.0476591	1.32185
ENSMUSG00000052539	4638.05	-0.240309	0.0768407	-3.12737	0.00176377	0.0476591	1.32185
ENSMUSG00000016477	1334.6	-0.214206	0.0685273	-3.12585	0.00177289	0.0478523	1.3201
ENSMUSG00000057123	24.5925	-1.061	0.339613	-3.12414	0.00178323	0.048078	1.31805
ENSMUSG00000053310	47122.3	-0.215999	0.0691516	-3.12355	0.00178683	0.0481218	1.31766
ENSMUSG00000026587	16130	-0.179141	0.05738	-3.12202	0.00179618	0.0482864	1.31618
ENSMUSG00000056394	314.131	0.3289	0.105353	3.12189	0.00179692	0.0482864	1.31618
ENSMUSG00000014602	73800.7	0.138377	0.0443363	3.12108	0.00180186	0.0483658	1.31546
ENSMUSG00000037363	732.096	0.282572	0.0905475	3.12071	0.00180418	0.0483746	1.31538
ENSMUSG00000090291	37.2018	-0.742837	0.238232	-3.11813	0.00182005	0.0487466	1.31206
ENSMUSG00000020604	453.588	0.478757	0.153556	3.1178	0.00182207	0.0487469	1.31205
ENSMUSG00000031673	5090.08	-0.322553	0.103473	-3.11728	0.00182528	0.0487791	1.31177
ENSMUSG00000038252	966.123	0.230481	0.0739601	3.11629	0.0018314	0.0488847	1.31083
ENSMUSG00000038457	40.59	-0.72505	0.232686	-3.116	0.00183325	0.0488847	1.31083
ENSMUSG00000033594	1170.94	-0.392426	0.125997	-3.11456	0.0018422	0.0490696	1.30919
ENSMUSG00000030849	2100.13	0.243897	0.0783324	3.11362	0.00184808	0.0491723	1.30828
ENSMUSG00000063887	8777.76	-0.206862	0.0664785	-3.11171	0.00186007	0.0494373	1.30595
ENSMUSG00000061607	1125.97	0.267305	0.0859524	3.10992	0.00187137	0.0496832	1.30379
ENSMUSG00000078597	9.11871	1.32954	0.427611	3.10924	0.00187571	0.0497441	1.30326
ENSMUSG00000069044	18.9662	7.03156	2.2626	3.10774	0.00188525	0.0498884	1.302
ENSMUSG00000100832	5.33629	-1.80127	0.579607	-3.10774	0.00188522	0.0498884	1.302
ENSMUSG00000060336	Zfp937
ENSMUSG00000063364	3300002I08Rik
ENSMUSG00000063393	Gm10130
ENSMUSG00000068130	Zfp442
ENSMUSG00000068134	Zfp120
ENSMUSG00000074731	Zfp345
ENSMUSG00000079008	Gm14124
ENSMUSG00000079009	Gm14139
ENSMUSG00000017667	Zfp334
ENSMUSG00000056824	Zfp663
ENSMUSG00000067480	Gm14403
ENSMUSG00000074519	Etohi1 (Zfp971)
ENSMUSG00000074521	Gm14327
ENSMUSG00000074527	Gm14296
ENSMUSG00000074529	C330013J21Rik (Zfp972)
ENSMUSG00000078861	Zfp931
ENSMUSG00000078862	Gm14326
ENSMUSG00000078863	Gm14325
ENSMUSG00000078864	Gm14322
ENSMUSG00000078865	Gm14406
ENSMUSG00000078866	Gm14420 (Zfp970)
ENSMUSG00000078867	Gm14418
ENSMUSG00000078868	Gm14412
ENSMUSG00000078870	Gm14410
ENSMUSG00000078872	Gm14401
ENSMUSG00000078875	Gm14419
ENSMUSG00000078876	Gm14408
ENSMUSG00000078877	Gm14295
ENSMUSG00000078878	Gm14305
ENSMUSG00000078879	Gm14306 (Zfp973)
ENSMUSG00000078880	Gm14308
ENSMUSG00000078881	Gm14434
ENSMUSG00000078882	Gm14431 (Zfp967)
ENSMUSG00000078883	Gm14430
ENSMUSG00000078884	Gm14436
ENSMUSG00000078885	Gm14432
ENSMUSG00000078886	Gm2026
ENSMUSG00000078887	Gm6710
ENSMUSG00000078888	Gm2007
ENSMUSG00000078889	Gm14288
ENSMUSG00000078890	Gm11007
ENSMUSG00000078891	Gm11008
ENSMUSG00000078893	Gm2004
ENSMUSG00000078894	2210418O10Rik
ENSMUSG00000078895	Gm11009
ENSMUSG00000078896	Gm8923 (Zfp965)
ENSMUSG00000078897	Gm4724
ENSMUSG00000078898	Gm4723 (Zfp968)
ENSMUSG00000078899	Gm4631
ENSMUSG00000078901	Gm14440
ENSMUSG00000078902	Gm14443
ENSMUSG00000078903	Gm14391
ENSMUSG00000078905	Gm14393
ENSMUSG00000078906	Gm14444
ENSMUSG00000089756	Gm8898 (Zfp966)
ENSMUSG00000089951	Gm14435 (Zfp968-ps)
ENSMUSG00000090093	Gm14399
ENSMUSG00000090221	Gm4245 (Zfp969)
ENSMUSG00000078503	Gm13225 (Zfp990)
ENSMUSG00000058186	Gm13242 (Zfp980)
ENSMUSG00000078500	Gm13235 (Zfp986)
ENSMUSG00000063245	Gm13248 (Zfp993)
ENSMUSG00000056300	Gm13247 (Zfp981)
ENSMUSG00000070605	Gm13251 (Zfp992)
ENSMUSG00000078499	Rex2
ENSMUSG00000066009	Gm13051 (Zfp987)
ENSMUSG00000066007	Zfp600
ENSMUSG00000086147	Gm13150 (Zfp989)
ENSMUSG00000067919	Gm13138
ENSMUSG00000067916	Gm13139 (Zfp991)
ENSMUSG00000078498	Gm13151 (Zfp988)
ENSMUSG00000078497	Gm13145 (Zfp978)
ENSMUSG00000078496	Gm13152 (Zfp982)
ENSMUSG00000065999	Gm13154 (Zfp985)
ENSMUSG00000066000	2610305D13Rik (Zfp979)
ENSMUSG00000062518	Zfp534
ENSMUSG00000078495	Gm13157 (Zfp984)
ENSMUSG00000059423	Zfp933
ENSMUSG00000023284	Zfp605
ENSMUSG00000066613	Zfp932
ENSMUSG00000072762	4930522L14Rik
ENSMUSG00000072763	5430403G16Rik
ENSMUSG00000090015	Gm15446
ENSMUSG00000029729	Zkscan1
ENSMUSG00000037007	Zfp113
ENSMUSG00000036898	Zfp157
ENSMUSG00000056014	A430033K04Rik
ENSMUSG00000058291	Zfp68
ENSMUSG00000029587	Zfp12
ENSMUSG00000046658	Zfp316
ENSMUSG00000061898	Rbak
ENSMUSG00000007812	Zfp655
ENSMUSG00000029627	Zkscan14
ENSMUSG00000055991	Zkscan5
ENSMUSG00000070420	Zfp498
ENSMUSG00000025821	Zfp282
ENSMUSG00000045466	Zfp956
ENSMUSG00000051499	Zfp786
ENSMUSG00000052763	Zfp212
ENSMUSG00000057691	Zfp746
ENSMUSG00000062519	Zfp398
ENSMUSG00000071477	Zfp777
ENSMUSG00000030145	Zfp248
ENSMUSG00000072623	Zfp9
ENSMUSG00000030443	Zfp583
ENSMUSG00000054893	Zfp667
ENSMUSG00000055150	Zfp78
ENSMUSG00000062861	Zfp28
ENSMUSG00000034538	Zfp418
ENSMUSG00000062116	Zfp954
ENSMUSG00000063535	Zfp773
ENSMUSG00000066838	Zfp772
ENSMUSG00000030386	Zfp606
ENSMUSG00000034071	Zfp551
ENSMUSG00000004500	Zfp324
ENSMUSG00000033961	Zfp446
ENSMUSG00000058638	Zfp110
ENSMUSG00000060397	Zfp128
ENSMUSG00000030486	Zfp108
ENSMUSG00000047603	Zfp235
ENSMUSG00000050605	Zfp61
ENSMUSG00000052675	Zfp112
ENSMUSG00000055305	Zfp93
ENSMUSG00000057101	Zfp180
ENSMUSG00000068962	Zfp114
ENSMUSG00000074282	Zfp94
ENSMUSG00000074283	Zfp109
ENSMUSG00000087598	Zfp111
ENSMUSG00000020420	Zfp607
ENSMUSG00000030604	Zfp626
ENSMUSG00000037640	Zfp60
ENSMUSG00000057093	C030039L03Rik
ENSMUSG00000063047	Zfp780b
ENSMUSG00000070709	1700049G17Rik
ENSMUSG00000078779	Zfp59
ENSMUSG00000011427	Zfp790
ENSMUSG00000046185	Zfp84
ENSMUSG00000047473	Zfp30
ENSMUSG00000050855	Zfp940
ENSMUSG00000053985	Zfp14
ENSMUSG00000058447	Zfp82
ENSMUSG00000059975	Zfp74
ENSMUSG00000062040	Zfp27
ENSMUSG00000074220	Zfp382
ENSMUSG00000074221	Zfp568
ENSMUSG00000078768	Zfp566
ENSMUSG00000056383	AI987944
ENSMUSG00000074165	Zfp788
ENSMUSG00000074166	AW146154
ENSMUSG00000090744	Gm6871
ENSMUSG00000091474	2610021A01Rik
ENSMUSG00000069727	Gm5595 (Zfp975)
ENSMUSG00000074158	9830147E19Rik
ENSMUSG00000091594	Gm17067
ENSMUSG00000092225	Gm2381
ENSMUSG00000092335	Gm7221 (ZFP977）
ENSMUSG00000092416	Zfp141
ENSMUSG00000012640	Zfp715
ENSMUSG00000064194	Zfp936
ENSMUSG00000074887	EU599041
ENSMUSG00000030469	Zfp719
ENSMUSG00000055102	Zfp819
ENSMUSG00000056592	Zfp658
ENSMUSG00000030823	9130019O22Rik
ENSMUSG00000045251	Zfp688
ENSMUSG00000045757	Zfp764
ENSMUSG00000048921	Zfp689
ENSMUSG00000054381	Zfp747
ENSMUSG00000078580	E430018J23Rik
ENSMUSG00000043090	Zfp866
ENSMUSG00000054648	Zfp869
ENSMUSG00000060427	Zfp868
ENSMUSG00000091764	Zfp964
ENSMUSG00000092260	Zfp963
ENSMUSG00000092544	Gm20422
ENSMUSG00000052446	Zfp961
ENSMUSG00000056019	Zfp709
ENSMUSG00000066880	Zfp617
ENSMUSG00000089857	Zfp882
ENSMUSG00000045519	Zfp560
ENSMUSG00000058192	Zfp846
ENSMUSG00000059475	Zfp426
ENSMUSG00000060510	Zfp266
ENSMUSG00000063108	Zfp26
ENSMUSG00000057982	Zfp809
ENSMUSG00000062794	Zfp599
ENSMUSG00000066829	Zfp810
ENSMUSG00000074472	Zfp872
ENSMUSG00000062540	Zfp781
ENSMUSG00000074860	Gm10778
ENSMUSG00000078436	Gm4767
ENSMUSG00000078437	Gm3055
ENSMUSG00000062931	Zfp938
ENSMUSG00000078435	AU041133
ENSMUSG00000020335	Zfp354b
ENSMUSG00000020364	Zfp354a
ENSMUSG00000044296	Zfp879
ENSMUSG00000044807	Zfp354c
ENSMUSG00000048728	Zfp454
ENSMUSG00000020491	2810021J22Rik
ENSMUSG00000037001	Zfp39
ENSMUSG00000068869	Gm12258
ENSMUSG00000020472	Zkscan17
ENSMUSG00000054519	Zfp867
ENSMUSG00000005267	Zfp287
ENSMUSG00000047342	Zfp286
ENSMUSG00000062632	Gm12588
ENSMUSG00000078564	Gm9631
ENSMUSG00000021327	Zkscan3
ENSMUSG00000063894	Zfp192
ENSMUSG00000055228	Zfp935
ENSMUSG00000072066	6720489N17Rik
ENSMUSG00000074865	Zfp934
ENSMUSG00000074867	Zfp808
ENSMUSG00000091183	Gm3604
ENSMUSG00000021510	A530054K11Rik
ENSMUSG00000030446	Zfp273
ENSMUSG00000048280	Zfp738
ENSMUSG00000051037	Zfp455
ENSMUSG00000052909	Gm9894
ENSMUSG00000055341	Zfp457
ENSMUSG00000055480	Zfp458
ENSMUSG00000055560	Zfp459
ENSMUSG00000056552	Zfp953
ENSMUSG00000057396	Zfp759
ENSMUSG00000057842	Zfp595
ENSMUSG00000058093	AA987161
ENSMUSG00000058246	Gm10037
ENSMUSG00000058331	Zfp85-rs1
ENSMUSG00000058883	Zfp708
ENSMUSG00000058900	Rsl1
ENSMUSG00000059839	Zfp874b
ENSMUSG00000069204	Zfp748
ENSMUSG00000069206	Zfp874a
ENSMUSG00000071281	Zfp71-rs1
ENSMUSG00000071285	Zfp87
ENSMUSG00000071291	Zfp58
ENSMUSG00000071295	Gm10323
ENSMUSG00000074824	Rslcan18
ENSMUSG00000074830	Zfp640
ENSMUSG00000078994	Zfp429
ENSMUSG00000078995	Zfp456
ENSMUSG00000090641	Zfp712
ENSMUSG00000090659	Zfp493
ENSMUSG00000069184	Zfp72
ENSMUSG00000069208	Zfp825
ENSMUSG00000022526	Zfp251
ENSMUSG00000033669	Zfp7
ENSMUSG00000054967	Zfp647
ENSMUSG00000022529	Zfp263
ENSMUSG00000039789	Zfp597
ENSMUSG00000067034	Zfp960
ENSMUSG00000072761	Gm6712
ENSMUSG00000073452	Zfp97
ENSMUSG00000023882	Zfp54
ENSMUSG00000023892	Zfp51
ENSMUSG00000033972	Zfp944
ENSMUSG00000035868	3110052M02Rik
ENSMUSG00000044501	Zfp758
ENSMUSG00000051341	Zfp52
ENSMUSG00000053347	Zfp943
ENSMUSG00000057409	Zfp53
ENSMUSG00000061544	Zfp229
ENSMUSG00000067928	Zfp760
ENSMUSG00000067931	Zfp948
ENSMUSG00000069743	Zfp820
ENSMUSG00000071266	Zfp946
ENSMUSG00000071267	Zfp942
ENSMUSG00000078546	2210404O09Rik
ENSMUSG00000062012	Zfp13
ENSMUSG00000071256	Zfp213
ENSMUSG00000003929	Zfp81
ENSMUSG00000008686	Zfp955a
ENSMUSG00000024298	Zfp871
ENSMUSG00000053390	Zfp952
ENSMUSG00000053600	Zfp472
ENSMUSG00000055240	Zfp101
ENSMUSG00000057254	Zfp870
ENSMUSG00000059000	Zfp799
ENSMUSG00000061532	Zfp955b
ENSMUSG00000067424	Zfp563
ENSMUSG00000067430	Zfp763
ENSMUSG00000003198	Zfp959
ENSMUSG00000057835	Zfp119a
ENSMUSG00000062101	Zfp119b
ENSMUSG00000023165	Ssxb2
ENSMUSG00000035371	Ssx9
ENSMUSG00000068218	Ssxb9
ENSMUSG00000068219	Ssxb10
ENSMUSG00000071816	Ssxb5
ENSMUSG00000079699	Gm6592
ENSMUSG00000079701	Ssxb3
ENSMUSG00000079703	Ssxb8
ENSMUSG00000079704	Gm14459
ENSMUSG00000079705	Ssxb1
ENSMUSG00000031079	Zfp300
ENSMUSG00000054737	Zfp182
ENSMUSG00000062814	Ssxa1
ENSMUSG00000040596	Pogk
ENSMUSG00000034800	Zfp661
ENSMUSG00000033883	D3Ertd254e
ENSMUSG00000028389	Zfp37
ENSMUSG00000038630	Zkscan16
ENSMUSG00000039634	Zfp189
ENSMUSG00000051351	Zfp46
ENSMUSG00000064141	Zfp69
ENSMUSG00000072774	Zfp951
ENSMUSG00000061969	Gm5581
ENSMUSG00000002266	Zim1
ENSMUSG00000030393	Zik1
ENSMUSG00000030757	Zkscan2
ENSMUSG00000048012	Zfp473
ENSMUSG00000060314	Zfp941
ENSMUSG00000068959	Zfp619
ENSMUSG00000031907	Zfp90
ENSMUSG00000044676	Zfp612
ENSMUSG00000055835	Zfp1
ENSMUSG00000058748	Zfp958
ENSMUSG00000059897	Zfp930
ENSMUSG00000074194	Zfp791
ENSMUSG00000091388	Gm17576
ENSMUSG00000025602	Zfp202
ENSMUSG00000032425	Zfp949
ENSMUSG00000043773	1700048O20Rik
ENSMUSG00000047036	Zfp445
ENSMUSG00000057551	Zfp317
ENSMUSG00000074500	Zfp558
ENSMUSG00000074829	2010315B03Rik
ENSMUSG00000050844	1700020N01Rik
ENSMUSG00000060301	2610008E11Rik
ENSMUSG00000018347	Zkscan6
ENSMUSG00000060630	Zfp735
ENSMUSG00000069476	Zfp616
ENSMUSG00000042063	Zfp386
ENSMUSG00000073158	9030624G23Rik
ENSMUSG00000073184	Gm10479
ENSMUSG00000073197	5730507C01Rik
ENSMUSG00000006720	Zfp184
ENSMUSG00000021514	Zfp369
ENSMUSG00000050954	Zfp169
ENSMUSG00000071302	Gm10324
ENSMUSG00000074832	2410141K09Rik (Zfp998)
ENSMUSG00000022987	Zfp641
ENSMUSG00000034429	Zfp707
ENSMUSG00000080717	B230307C23Rik
ENSMUSG00000002617	Zfp40
ENSMUSG00000051977	Prdm9
ENSMUSG00000059142	Zfp945
ENSMUSG00000067942	Zfp160
ENSMUSG00000092139	NCBIM37
ENSMUSG00000031374	Zfp92
ENSMUSG00000079697	Gm5751

## Sheet: HIP YM
Gene	baseMean	log2FoldChange	lfcSE	stat	pvalue	padj	Volcano FDR
ENSMUSG00000036036	189.611	-0.893953	0.219292	-4.07655	4.57095e-05	0.0153778	1.81311
ENSMUSG00000036036	Zfp57
ENSMUSG00000118642	13687.6	2.97073	0.199346	14.9023	3.18262e-50	7.68157e-46	45.1146
ENSMUSG00000035551	52.0044	-2.96763	0.25052	-11.8459	2.25986e-32	2.72719e-28	27.5643
ENSMUSG00000037708	134.855	1.4524	0.157439	9.22518	2.83082e-20	2.27749e-16	15.6425
ENSMUSG00000098973	431.332	1.65389	0.198039	8.35133	6.74991e-17	4.0729e-13	12.3901
ENSMUSG00000119584	2438.59	1.54476	0.187571	8.2356	1.78663e-16	8.62443e-13	12.0643
ENSMUSG00000115529	201.439	-1.5817	0.211903	-7.46425	8.37764e-14	3.37005e-10	9.47236
ENSMUSG00000073418	3504.53	1.13084	0.154002	7.343	2.08863e-13	7.20161e-10	9.14257
ENSMUSG00000046764	21.144	2.76461	0.384247	7.19487	6.25184e-13	1.88618e-09	8.72442
ENSMUSG00000020914	142.353	-1.50346	0.215654	-6.97162	3.13305e-12	8.40215e-09	8.07561
ENSMUSG00000103332	791.236	0.717144	0.105008	6.82944	8.52486e-12	2.05756e-08	7.68665
ENSMUSG00000031004	148.458	-1.33324	0.195826	-6.80829	9.87625e-12	2.16703e-08	7.66414
ENSMUSG00000063632	1434.63	-0.680827	0.113741	-5.98574	2.15404e-09	4.33248e-06	5.36326
ENSMUSG00000051599	284.731	0.851033	0.143371	5.93586	2.92303e-09	5.42694e-06	5.26544
ENSMUSG00000029005	31.6003	-1.60299	0.273478	-5.86152	4.58661e-09	7.38016e-06	5.13193
ENSMUSG00000098132	53.6819	-1.21784	0.207766	-5.86159	4.58457e-09	7.38016e-06	5.13193
ENSMUSG00000029826	733.811	0.679511	0.117397	5.78816	7.11603e-09	1.07345e-05	4.96922
ENSMUSG00000051242	1021.39	0.659275	0.11562	5.7021	1.18341e-08	1.68017e-05	4.77465
ENSMUSG00000026605	121.976	-0.869706	0.153284	-5.67382	1.39645e-08	1.87248e-05	4.72758
ENSMUSG00000032446	11.5675	-4.10885	0.731549	-5.61664	1.94705e-08	2.43927e-05	4.61274
ENSMUSG00000113342	9.79449	4.64568	0.828082	5.61017	2.02127e-08	2.43927e-05	4.61274
ENSMUSG00000034810	459.959	0.719443	0.130877	5.49708	3.86126e-08	4.43788e-05	4.35282
ENSMUSG00000041828	1656.45	0.693327	0.127699	5.42936	5.65555e-08	6.20466e-05	4.20728
ENSMUSG00000114189	32.1673	1.63286	0.302582	5.39644	6.79775e-08	7.1335e-05	4.1467
ENSMUSG00000025578	418.604	-0.528777	0.101581	-5.20547	1.93506e-07	0.000186818	3.72858
ENSMUSG00000069267	24.4122	-1.79692	0.344742	-5.21237	1.8644e-07	0.000186818	3.72858
ENSMUSG00000044042	3636.06	0.358984	0.0695379	5.16241	2.43786e-07	0.000226309	3.6453
ENSMUSG00000104264	29.2686	1.33525	0.26227	5.09114	3.55921e-07	0.000318167	3.49734
ENSMUSG00000038943	62.0083	-1.10567	0.218539	-5.05935	4.20683e-07	0.000359247	3.44461
ENSMUSG00000040204	14.3879	-2.36773	0.468445	-5.05444	4.31645e-07	0.000359247	3.44461
ENSMUSG00000028864	443.779	0.636683	0.12715	5.00734	5.51867e-07	0.00043936	3.35718
ENSMUSG00000117254	676.115	0.69852	0.139619	5.00305	5.64308e-07	0.00043936	3.35718
ENSMUSG00000028364	713.351	-0.866415	0.174949	-4.95239	7.33078e-07	0.000552924	3.25733
ENSMUSG00000045689	525.22	0.592623	0.120435	4.92071	8.62318e-07	0.000630694	3.20018
ENSMUSG00000024164	108.072	1.28469	0.262062	4.90221	9.47623e-07	0.000672701	3.17218
ENSMUSG00000033952	70.7426	-1.01329	0.207202	-4.89035	1.00659e-06	0.000694145	3.15855
ENSMUSG00000053399	65.2387	-1.16924	0.240353	-4.86466	1.14656e-06	0.000747931	3.12614
ENSMUSG00000114479	96.2606	1.50618	0.309433	4.86756	1.12983e-06	0.000747931	3.12614
ENSMUSG00000052229	2045.17	-0.58962	0.12178	-4.84169	1.28737e-06	0.000817683	3.08742
ENSMUSG00000041431	37.4265	-1.3988	0.29292	-4.77536	1.79387e-06	0.00111018	2.95461
ENSMUSG00000035202	984.727	0.635163	0.133675	4.75155	2.01866e-06	0.00121806	2.91433
ENSMUSG00000045876	329.49	0.77855	0.164833	4.72327	2.32086e-06	0.00136625	2.86447
ENSMUSG00000096107	10.4682	2.11477	0.454758	4.65033	3.31409e-06	0.00190449	2.72022
ENSMUSG00000024534	207.769	-0.628099	0.136318	-4.60761	4.07318e-06	0.00228629	2.64087
ENSMUSG00000001506	137.987	-1.12176	0.244466	-4.5886	4.46226e-06	0.00244775	2.61123
ENSMUSG00000021765	60.7398	-1.18172	0.258217	-4.57645	4.72941e-06	0.00247796	2.60591
ENSMUSG00000030223	2457.54	-0.471977	0.103139	-4.57615	4.73613e-06	0.00247796	2.60591
ENSMUSG00000041460	146.749	-0.950255	0.207831	-4.57224	4.82533e-06	0.00247796	2.60591
ENSMUSG00000074704	62.8437	0.847293	0.187929	4.50859	6.52606e-06	0.00328152	2.48393
ENSMUSG00000064655	261.711	0.674107	0.149724	4.50232	6.72162e-06	0.00331088	2.48006
ENSMUSG00000047307	404.682	0.455753	0.101333	4.49757	6.87332e-06	0.00331789	2.47914
ENSMUSG00000098758	44.5656	1.74578	0.391013	4.46477	8.01544e-06	0.00379335	2.42098
ENSMUSG00000048070	87.3351	0.777989	0.175451	4.43422	9.24071e-06	0.00428911	2.36763
ENSMUSG00000046805	1190.33	0.409111	0.0923801	4.42857	9.48621e-06	0.00431998	2.36452
ENSMUSG00000029661	581.771	-0.734604	0.16619	-4.42026	9.8582e-06	0.00440625	2.35593
ENSMUSG00000021453	301.758	-0.589839	0.134045	-4.4003	1.08101e-05	0.00474385	2.32387
ENSMUSG00000026822	92.7771	-4.95375	1.14117	-4.34095	1.41868e-05	0.00611449	2.21364
ENSMUSG00000026380	431.429	0.482598	0.111732	4.31926	1.56551e-05	0.00629753	2.20083
ENSMUSG00000027932	182.558	-0.565576	0.130803	-4.32389	1.53299e-05	0.00629753	2.20083
ENSMUSG00000043313	1504.69	0.518863	0.120068	4.32142	1.55031e-05	0.00629753	2.20083
ENSMUSG00000063626	1831.87	0.390439	0.0902407	4.32664	1.51402e-05	0.00629753	2.20083
ENSMUSG00000092837	62.318	1.20822	0.281657	4.28968	1.78931e-05	0.00707981	2.14998
ENSMUSG00000025479	20.9092	1.91462	0.446783	4.28535	1.82449e-05	0.00710258	2.14858
ENSMUSG00000001228	50.0979	-1.07853	0.252863	-4.26526	1.99669e-05	0.00764954	2.11636
ENSMUSG00000026475	608.066	-0.903752	0.212092	-4.26112	2.03402e-05	0.00767079	2.11516
ENSMUSG00000111669	79.5243	0.929653	0.220401	4.218	2.46476e-05	0.00915224	2.03847
ENSMUSG00000022033	23.0995	-1.48009	0.352561	-4.19813	2.69132e-05	0.00984207	2.00691
ENSMUSG00000010461	408.929	0.420323	0.100501	4.18226	2.88628e-05	0.0103975	1.98307
ENSMUSG00000109874	168.003	0.613959	0.148522	4.1338	3.56819e-05	0.012665	1.8974
ENSMUSG00000030796	74.9716	-0.740538	0.179981	-4.11453	3.87976e-05	0.0135713	1.86738
ENSMUSG00000012443	169.815	-0.593895	0.14474	-4.10319	4.07493e-05	0.0140504	1.85231
ENSMUSG00000028639	5428.41	-0.249231	0.0611503	-4.07571	4.58735e-05	0.0153778	1.81311
ENSMUSG00000078117	358.579	0.576314	0.141538	4.07181	4.66501e-05	0.0154239	1.8118
ENSMUSG00000031170	149.786	-0.673984	0.165914	-4.06225	4.86021e-05	0.0157982	1.80139
ENSMUSG00000063297	12176	0.373153	0.0919117	4.05991	4.90912e-05	0.0157982	1.80139
ENSMUSG00000021948	2720.93	-0.916784	0.226299	-4.0512	5.09549e-05	0.0161822	1.79096
ENSMUSG00000044043	1405.57	0.329587	0.0818029	4.02903	5.60063e-05	0.0175554	1.75559
ENSMUSG00000031494	26.2493	1.29543	0.321993	4.02317	5.74196e-05	0.0177677	1.75037
ENSMUSG00000047632	176.621	-0.634186	0.157894	-4.01653	5.9062e-05	0.0180446	1.74365
ENSMUSG00000019787	19.7869	1.56326	0.389961	4.00875	6.10405e-05	0.0184159	1.73481
ENSMUSG00000065259	125.896	0.769078	0.192673	3.99161	6.56253e-05	0.0193162	1.71408
ENSMUSG00000095041	9524.44	0.546174	0.136825	3.99177	6.55811e-05	0.0193162	1.71408
ENSMUSG00000028678	12.1269	-1.63869	0.411816	-3.97918	6.91545e-05	0.0201098	1.69659
ENSMUSG00000049436	68.057	0.835904	0.211219	3.95753	7.57295e-05	0.0212536	1.67257
ENSMUSG00000059182	1245.84	0.289914	0.0732202	3.95948	7.51131e-05	0.0212536	1.67257
ENSMUSG00000115422	29.2884	-1.1439	0.288679	-3.96254	7.4156e-05	0.0212536	1.67257
ENSMUSG00000026303	67.8244	0.757511	0.191747	3.95057	7.79646e-05	0.0216294	1.66496
ENSMUSG00000020354	534.073	0.424725	0.107816	3.93935	8.17011e-05	0.0224084	1.64959
ENSMUSG00000087819	1115.65	0.569569	0.14519	3.92294	8.74763e-05	0.0237228	1.62483
ENSMUSG00000028640	4.76398	-3.82818	0.982145	-3.89778	9.70801e-05	0.0260347	1.58445
ENSMUSG00000086537	23.5068	-1.10499	0.284996	-3.87722	0.000105657	0.0280236	1.55248
ENSMUSG00000064344	78.9829	0.710615	0.183632	3.86977	0.000108937	0.0285794	1.54395
ENSMUSG00000103793	763.014	0.419309	0.10946	3.83072	0.000127769	0.0331595	1.47939
ENSMUSG00000076431	898.883	-0.325336	0.0850565	-3.82493	0.000130807	0.0335868	1.47383
ENSMUSG00000077457	11.0513	1.62583	0.427547	3.80268	0.00014314	0.0363665	1.4393
ENSMUSG00000051663	23.3152	1.15201	0.303868	3.79116	0.000149943	0.0376982	1.42368
ENSMUSG00000037725	37.6532	-0.917097	0.242955	-3.77477	0.000160158	0.0395881	1.40244
ENSMUSG00000107451	151.697	0.493038	0.130646	3.77386	0.00016074	0.0395881	1.40244
ENSMUSG00000018589	598.504	-0.455554	0.121137	-3.76065	0.000169472	0.0413169	1.38387
ENSMUSG00000112968	11.4111	1.80519	0.480714	3.75523	0.000173182	0.0417991	1.37883
ENSMUSG00000035274	292.497	-0.952554	0.254365	-3.74483	0.000180519	0.0428331	1.36822
ENSMUSG00000077704	58.2837	0.723951	0.193356	3.74414	0.000181015	0.0428331	1.36822
ENSMUSG00000119073	101.84	0.580696	0.155345	3.7381	0.000185413	0.0434478	1.36203
ENSMUSG00000104093	329.138	0.661042	0.177258	3.72925	0.000192047	0.0441452	1.35512
ENSMUSG00002075512	21.6009	1.34784	0.361353	3.72998	0.000191495	0.0441452	1.35512
ENSMUSG00000092312	4.53017	3.1152	0.836779	3.72285	0.00019699	0.0448542	1.3482
ENSMUSG00000051678	340.843	0.584939	0.157545	3.71283	0.000204952	0.0458029	1.33911
ENSMUSG00000105980	53.4794	0.795334	0.214114	3.71454	0.00020357	0.0458029	1.33911
ENSMUSG00000033453	520.231	-0.697577	0.188616	-3.6984	0.000216959	0.0480416	1.31838
ENSMUSG00000041046	242.149	-0.869271	0.235735	-3.6875	0.000226468	0.0495279	1.30515
ENSMUSG00000104674	288.747	0.727877	0.197469	3.68603	0.000227776	0.0495279	1.30515
ENSMUSG00000119227	434.078	0.762381	0.207063	3.68187	0.000231525	0.0498937	1.30195
ENSMUSG00000060336	Zfp937
ENSMUSG00000063364	3300002I08Rik
ENSMUSG00000063393	Gm10130
ENSMUSG00000068130	Zfp442
ENSMUSG00000068134	Zfp120
ENSMUSG00000074731	Zfp345
ENSMUSG00000079008	Gm14124
ENSMUSG00000079009	Gm14139
ENSMUSG00000017667	Zfp334
ENSMUSG00000056824	Zfp663
ENSMUSG00000067480	Gm14403
ENSMUSG00000074519	Etohi1 (Zfp971)
ENSMUSG00000074521	Gm14327
ENSMUSG00000074527	Gm14296
ENSMUSG00000074529	C330013J21Rik (Zfp972)
ENSMUSG00000078861	Zfp931
ENSMUSG00000078862	Gm14326
ENSMUSG00000078863	Gm14325
ENSMUSG00000078864	Gm14322
ENSMUSG00000078865	Gm14406
ENSMUSG00000078866	Gm14420 (Zfp970)
ENSMUSG00000078867	Gm14418
ENSMUSG00000078868	Gm14412
ENSMUSG00000078870	Gm14410
ENSMUSG00000078872	Gm14401
ENSMUSG00000078875	Gm14419
ENSMUSG00000078876	Gm14408
ENSMUSG00000078877	Gm14295
ENSMUSG00000078878	Gm14305
ENSMUSG00000078879	Gm14306 (Zfp973)
ENSMUSG00000078880	Gm14308
ENSMUSG00000078881	Gm14434
ENSMUSG00000078882	Gm14431 (Zfp967)
ENSMUSG00000078883	Gm14430
ENSMUSG00000078884	Gm14436
ENSMUSG00000078885	Gm14432
ENSMUSG00000078886	Gm2026
ENSMUSG00000078887	Gm6710
ENSMUSG00000078888	Gm2007
ENSMUSG00000078889	Gm14288
ENSMUSG00000078890	Gm11007
ENSMUSG00000078891	Gm11008
ENSMUSG00000078893	Gm2004
ENSMUSG00000078894	2210418O10Rik
ENSMUSG00000078895	Gm11009
ENSMUSG00000078896	Gm8923 (Zfp965)
ENSMUSG00000078897	Gm4724
ENSMUSG00000078898	Gm4723 (Zfp968)
ENSMUSG00000078899	Gm4631
ENSMUSG00000078901	Gm14440
ENSMUSG00000078902	Gm14443
ENSMUSG00000078903	Gm14391
ENSMUSG00000078905	Gm14393
ENSMUSG00000078906	Gm14444
ENSMUSG00000089756	Gm8898 (Zfp966)
ENSMUSG00000089951	Gm14435 (Zfp968-ps)
ENSMUSG00000090093	Gm14399
ENSMUSG00000090221	Gm4245 (Zfp969)
ENSMUSG00000078503	Gm13225 (Zfp990)
ENSMUSG00000058186	Gm13242 (Zfp980)
ENSMUSG00000078502	Gm13212 (Zfp268)
ENSMUSG00000078500	Gm13235 (Zfp986)
ENSMUSG00000063245	Gm13248 (Zfp993)
ENSMUSG00000056300	Gm13247 (Zfp981)
ENSMUSG00000070605	Gm13251 (Zfp992)
ENSMUSG00000078499	Rex2
ENSMUSG00000066009	Gm13051 (Zfp987)
ENSMUSG00000066007	Zfp600
ENSMUSG00000086147	Gm13150 (Zfp989)
ENSMUSG00000067919	Gm13138
ENSMUSG00000067916	Gm13139 (Zfp991)
ENSMUSG00000078498	Gm13151 (Zfp988)
ENSMUSG00000078497	Gm13145 (Zfp978)
ENSMUSG00000078496	Gm13152 (Zfp982)
ENSMUSG00000065999	Gm13154 (Zfp985)
ENSMUSG00000066000	2610305D13Rik (Zfp979)
ENSMUSG00000062518	Zfp534
ENSMUSG00000078495	Gm13157 (Zfp984)
ENSMUSG00000059423	Zfp933
ENSMUSG00000023284	Zfp605
ENSMUSG00000066613	Zfp932
ENSMUSG00000072762	4930522L14Rik
ENSMUSG00000072763	5430403G16Rik
ENSMUSG00000090015	Gm15446
ENSMUSG00000029729	Zkscan1
ENSMUSG00000037007	Zfp113
ENSMUSG00000036898	Zfp157
ENSMUSG00000056014	A430033K04Rik
ENSMUSG00000058291	Zfp68
ENSMUSG00000029587	Zfp12
ENSMUSG00000046658	Zfp316
ENSMUSG00000061898	Rbak
ENSMUSG00000007812	Zfp655
ENSMUSG00000029627	Zkscan14
ENSMUSG00000055991	Zkscan5
ENSMUSG00000070420	Zfp498
ENSMUSG00000025821	Zfp282
ENSMUSG00000045466	Zfp956
ENSMUSG00000051499	Zfp786
ENSMUSG00000052763	Zfp212
ENSMUSG00000057691	Zfp746
ENSMUSG00000062519	Zfp398
ENSMUSG00000071477	Zfp777
ENSMUSG00000030145	Zfp248
ENSMUSG00000072623	Zfp9
ENSMUSG00000030443	Zfp583
ENSMUSG00000054893	Zfp667
ENSMUSG00000055150	Zfp78
ENSMUSG00000062861	Zfp28
ENSMUSG00000034538	Zfp418
ENSMUSG00000062116	Zfp954
ENSMUSG00000063535	Zfp773
ENSMUSG00000066838	Zfp772
ENSMUSG00000030386	Zfp606
ENSMUSG00000034071	Zfp551
ENSMUSG00000004500	Zfp324
ENSMUSG00000033961	Zfp446
ENSMUSG00000058638	Zfp110
ENSMUSG00000060397	Zfp128
ENSMUSG00000030486	Zfp108
ENSMUSG00000047603	Zfp235
ENSMUSG00000050605	Zfp61
ENSMUSG00000052675	Zfp112
ENSMUSG00000055305	Zfp93
ENSMUSG00000057101	Zfp180
ENSMUSG00000068962	Zfp114
ENSMUSG00000074282	Zfp94
ENSMUSG00000074283	Zfp109
ENSMUSG00000087598	Zfp111
ENSMUSG00000020420	Zfp607
ENSMUSG00000030604	Zfp626
ENSMUSG00000037640	Zfp60
ENSMUSG00000057093	C030039L03Rik
ENSMUSG00000063047	Zfp780b
ENSMUSG00000070709	1700049G17Rik
ENSMUSG00000078779	Zfp59
ENSMUSG00000011427	Zfp790
ENSMUSG00000046185	Zfp84
ENSMUSG00000047473	Zfp30
ENSMUSG00000050855	Zfp940
ENSMUSG00000053985	Zfp14
ENSMUSG00000058447	Zfp82
ENSMUSG00000059975	Zfp74
ENSMUSG00000062040	Zfp27
ENSMUSG00000074220	Zfp382
ENSMUSG00000074221	Zfp568
ENSMUSG00000078768	Zfp566
ENSMUSG00000056383	AI987944
ENSMUSG00000074165	Zfp788
ENSMUSG00000074166	AW146154
ENSMUSG00000090744	Gm6871
ENSMUSG00000091474	2610021A01Rik
ENSMUSG00000069727	Gm5595 (Zfp975)
ENSMUSG00000074158	9830147E19Rik
ENSMUSG00000091594	Gm17067
ENSMUSG00000092225	Gm2381
ENSMUSG00000092335	Gm7221 (ZFP977）
ENSMUSG00000092416	Zfp141
ENSMUSG00000012640	Zfp715
ENSMUSG00000064194	Zfp936
ENSMUSG00000074887	EU599041
ENSMUSG00000030469	Zfp719
ENSMUSG00000055102	Zfp819
ENSMUSG00000056592	Zfp658
ENSMUSG00000030823	9130019O22Rik
ENSMUSG00000045251	Zfp688
ENSMUSG00000045757	Zfp764
ENSMUSG00000048921	Zfp689
ENSMUSG00000054381	Zfp747
ENSMUSG00000078580	E430018J23Rik
ENSMUSG00000043090	Zfp866
ENSMUSG00000054648	Zfp869
ENSMUSG00000060427	Zfp868
ENSMUSG00000091764	Zfp964
ENSMUSG00000092260	Zfp963
ENSMUSG00000092544	Gm20422
ENSMUSG00000052446	Zfp961
ENSMUSG00000056019	Zfp709
ENSMUSG00000066880	Zfp617
ENSMUSG00000089857	Zfp882
ENSMUSG00000045519	Zfp560
ENSMUSG00000058192	Zfp846
ENSMUSG00000059475	Zfp426
ENSMUSG00000060510	Zfp266
ENSMUSG00000063108	Zfp26
ENSMUSG00000057982	Zfp809
ENSMUSG00000062794	Zfp599
ENSMUSG00000066829	Zfp810
ENSMUSG00000074472	Zfp872
ENSMUSG00000062540	Zfp781
ENSMUSG00000074860	Gm10778
ENSMUSG00000078436	Gm4767
ENSMUSG00000078437	Gm3055
ENSMUSG00000062931	Zfp938
ENSMUSG00000078435	AU041133
ENSMUSG00000020335	Zfp354b
ENSMUSG00000020364	Zfp354a
ENSMUSG00000044296	Zfp879
ENSMUSG00000044807	Zfp354c
ENSMUSG00000048728	Zfp454
ENSMUSG00000020491	2810021J22Rik
ENSMUSG00000037001	Zfp39
ENSMUSG00000068869	Gm12258
ENSMUSG00000020472	Zkscan17
ENSMUSG00000054519	Zfp867
ENSMUSG00000005267	Zfp287
ENSMUSG00000047342	Zfp286
ENSMUSG00000062632	Gm12588
ENSMUSG00000078564	Gm9631
ENSMUSG00000021327	Zkscan3
ENSMUSG00000063894	Zfp192
ENSMUSG00000055228	Zfp935
ENSMUSG00000072066	6720489N17Rik
ENSMUSG00000074865	Zfp934
ENSMUSG00000074867	Zfp808
ENSMUSG00000091183	Gm3604
ENSMUSG00000021510	A530054K11Rik
ENSMUSG00000030446	Zfp273
ENSMUSG00000048280	Zfp738
ENSMUSG00000051037	Zfp455
ENSMUSG00000052909	Gm9894
ENSMUSG00000055341	Zfp457
ENSMUSG00000055480	Zfp458
ENSMUSG00000055560	Zfp459
ENSMUSG00000056552	Zfp953
ENSMUSG00000057396	Zfp759
ENSMUSG00000057842	Zfp595
ENSMUSG00000058093	AA987161
ENSMUSG00000058246	Gm10037
ENSMUSG00000058331	Zfp85-rs1
ENSMUSG00000058883	Zfp708
ENSMUSG00000058900	Rsl1
ENSMUSG00000059839	Zfp874b
ENSMUSG00000069204	Zfp748
ENSMUSG00000069206	Zfp874a
ENSMUSG00000071281	Zfp71-rs1
ENSMUSG00000071285	Zfp87
ENSMUSG00000071291	Zfp58
ENSMUSG00000071295	Gm10323
ENSMUSG00000074824	Rslcan18
ENSMUSG00000074830	Zfp640
ENSMUSG00000078994	Zfp429
ENSMUSG00000078995	Zfp456
ENSMUSG00000090641	Zfp712
ENSMUSG00000090659	Zfp493
ENSMUSG00000069184	Zfp72
ENSMUSG00000069208	Zfp825
ENSMUSG00000022526	Zfp251
ENSMUSG00000033669	Zfp7
ENSMUSG00000054967	Zfp647
ENSMUSG00000022529	Zfp263
ENSMUSG00000039789	Zfp597
ENSMUSG00000067034	Zfp960
ENSMUSG00000072761	Gm6712
ENSMUSG00000073452	Zfp97
ENSMUSG00000023882	Zfp54
ENSMUSG00000023892	Zfp51
ENSMUSG00000033972	Zfp944
ENSMUSG00000035868	3110052M02Rik
ENSMUSG00000044501	Zfp758
ENSMUSG00000051341	Zfp52
ENSMUSG00000053347	Zfp943
ENSMUSG00000057409	Zfp53
ENSMUSG00000061544	Zfp229
ENSMUSG00000062743	Zfp677
ENSMUSG00000063383	Zfp947
ENSMUSG00000067928	Zfp760
ENSMUSG00000067931	Zfp948
ENSMUSG00000069743	Zfp820
ENSMUSG00000071266	Zfp946
ENSMUSG00000071267	Zfp942
ENSMUSG00000078546	2210404O09Rik
ENSMUSG00000062012	Zfp13
ENSMUSG00000071256	Zfp213
ENSMUSG00000003929	Zfp81
ENSMUSG00000008686	Zfp955a
ENSMUSG00000024298	Zfp871
ENSMUSG00000053390	Zfp952
ENSMUSG00000053600	Zfp472
ENSMUSG00000055202	Zfp811
ENSMUSG00000055240	Zfp101
ENSMUSG00000057254	Zfp870
ENSMUSG00000059000	Zfp799
ENSMUSG00000061532	Zfp955b
ENSMUSG00000067424	Zfp563
ENSMUSG00000067430	Zfp763
ENSMUSG00000003198	Zfp959
ENSMUSG00000057835	Zfp119a
ENSMUSG00000062101	Zfp119b
ENSMUSG00000023165	Ssxb2
ENSMUSG00000035371	Ssx9
ENSMUSG00000068218	Ssxb9
ENSMUSG00000068219	Ssxb10
ENSMUSG00000071816	Ssxb5
ENSMUSG00000079699	Gm6592
ENSMUSG00000079701	Ssxb3
ENSMUSG00000079703	Ssxb8
ENSMUSG00000079704	Gm14459
ENSMUSG00000079705	Ssxb1
ENSMUSG00000031079	Zfp300
ENSMUSG00000054737	Zfp182
ENSMUSG00000062814	Ssxa1
ENSMUSG00000040596	Pogk
ENSMUSG00000034800	Zfp661
ENSMUSG00000033883	D3Ertd254e
ENSMUSG00000028389	Zfp37
ENSMUSG00000038630	Zkscan16
ENSMUSG00000039634	Zfp189
ENSMUSG00000051351	Zfp46
ENSMUSG00000064141	Zfp69
ENSMUSG00000072774	Zfp951
ENSMUSG00000061969	Gm5581
ENSMUSG00000002266	Zim1
ENSMUSG00000030393	Zik1
ENSMUSG00000030757	Zkscan2
ENSMUSG00000048012	Zfp473
ENSMUSG00000060314	Zfp941
ENSMUSG00000068959	Zfp619
ENSMUSG00000031907	Zfp90
ENSMUSG00000044676	Zfp612
ENSMUSG00000055835	Zfp1
ENSMUSG00000058748	Zfp958
ENSMUSG00000059897	Zfp930
ENSMUSG00000074194	Zfp791
ENSMUSG00000091388	Gm17576
ENSMUSG00000025602	Zfp202
ENSMUSG00000032425	Zfp949
ENSMUSG00000043773	1700048O20Rik
ENSMUSG00000047036	Zfp445
ENSMUSG00000057551	Zfp317
ENSMUSG00000074500	Zfp558
ENSMUSG00000074829	2010315B03Rik
ENSMUSG00000050844	1700020N01Rik
ENSMUSG00000060301	2610008E11Rik
ENSMUSG00000018347	Zkscan6
ENSMUSG00000060630	Zfp735
ENSMUSG00000069476	Zfp616
ENSMUSG00000042063	Zfp386
ENSMUSG00000073158	9030624G23Rik
ENSMUSG00000073184	Gm10479
ENSMUSG00000073197	5730507C01Rik
ENSMUSG00000006720	Zfp184
ENSMUSG00000021514	Zfp369
ENSMUSG00000050954	Zfp169
ENSMUSG00000071302	Gm10324
ENSMUSG00000074832	2410141K09Rik (Zfp998)
ENSMUSG00000022987	Zfp641
ENSMUSG00000034429	Zfp707
ENSMUSG00000080717	B230307C23Rik
ENSMUSG00000002617	Zfp40
ENSMUSG00000051977	Prdm9
ENSMUSG00000059142	Zfp945
ENSMUSG00000067942	Zfp160
ENSMUSG00000092139	NCBIM37
ENSMUSG00000031374	Zfp92
ENSMUSG00000079697	Gm5751

## Sheet: HIPYO
Gene	baseMean	log2FoldChange	lfcSE	stat	pvalue	padj	Volcano FDR
ENSMUSG00000078881	29.8255	22.3842	3.02735	7.39399	1.42488e-13	9.89379e-11	10.0046
ENSMUSG00000036036	197.953	-0.886542	0.248042	-3.57415	0.000351361	0.024908	1.60366
ENSMUSG00000078502	11.5145	1.57956	0.462954	3.41192	0.000645067	0.0397009	1.4012
ENSMUSG00000078881	Gm14434
ENSMUSG00000078502	Gm13212 (Zfp268)
ENSMUSG00000036036	Zfp57
ENSMUSG00000073418	9618.13	2.88782	0.0841148	34.3319	2.62297e-258	7.10301e-254	253.149
ENSMUSG00000118642	16721	3.22682	0.23243	13.883	8.03242e-44	1.08759e-39	38.9635
ENSMUSG00000037708	183.714	1.95886	0.145237	13.4874	1.85596e-41	1.67531e-37	36.7759
ENSMUSG00000079293	155.044	3.10712	0.236059	13.1625	1.44252e-39	9.76587e-36	35.0103
ENSMUSG00000020932	23615.5	0.964219	0.0744412	12.9528	2.26665e-38	1.22762e-34	33.9109
ENSMUSG00000056999	5618.31	-1.0605	0.0824884	-12.8564	7.92232e-38	3.5756e-34	33.4467
ENSMUSG00000119584	2672.57	1.64214	0.136367	12.0421	2.13577e-33	8.26237e-30	29.0829
ENSMUSG00000035551	53.0428	-3.26414	0.275967	-11.828	2.79604e-32	9.46458e-29	28.0239
ENSMUSG00000030789	72.976	2.83459	0.240659	11.7785	5.03972e-32	1.5164e-28	27.8192
ENSMUSG00000046805	1662.52	1.08462	0.0994503	10.9062	1.077e-27	2.91652e-24	23.5351
ENSMUSG00000046764	40.968	3.75708	0.357893	10.4978	8.8429e-26	2.17696e-22	21.6621
ENSMUSG00000068129	33.1604	3.43429	0.337352	10.1801	2.43253e-24	5.48941e-21	20.2605
ENSMUSG00000024164	231.486	2.60007	0.258342	10.0645	7.93259e-24	1.65242e-20	19.7819
ENSMUSG00000004707	43.9919	2.89686	0.290073	9.98669	1.74311e-23	3.37168e-20	19.4722
ENSMUSG00000098973	477.278	1.76766	0.191714	9.22029	2.96288e-20	5.34898e-17	16.2717
ENSMUSG00000051242	1295.11	1.09688	0.121963	8.99356	2.39354e-19	4.05107e-16	15.3924
ENSMUSG00000029826	856.897	0.9376	0.104592	8.96437	3.12063e-19	4.97098e-16	15.3036
ENSMUSG00000035778	444.922	0.935255	0.104857	8.91933	4.69112e-19	7.05752e-16	15.1513
ENSMUSG00000113342	38.3228	6.6012	0.750396	8.79695	1.4059e-18	2.00378e-15	14.6982
ENSMUSG00000037686	181.395	1.42546	0.16565	8.60527	7.61385e-18	9.81824e-15	14.008
ENSMUSG00000115529	197.085	-1.98448	0.230503	-8.60934	7.34835e-18	9.81824e-15	14.008
ENSMUSG00000029816	452.25	1.27441	0.15187	8.3915	4.79962e-17	5.90789e-14	13.2286
ENSMUSG00000069516	906.241	1.72793	0.209535	8.2465	1.631e-16	1.92032e-13	12.7166
ENSMUSG00000031004	138.446	-1.99807	0.242668	-8.23375	1.81439e-16	2.04724e-13	12.6888
ENSMUSG00000030577	26.9385	2.77233	0.340148	8.15036	3.6283e-16	3.93018e-13	12.4056
ENSMUSG00000038642	5321.21	0.957048	0.118451	8.07969	6.49307e-16	6.76278e-13	12.1699
ENSMUSG00000057596	165.29	1.01314	0.125765	8.0558	7.89584e-16	7.91923e-13	12.1013
ENSMUSG00000049723	20.8184	4.86759	0.6085	7.99932	1.25103e-15	1.20993e-12	11.9172
ENSMUSG00000027995	99.1623	1.3085	0.165205	7.92051	2.36542e-15	2.20881e-12	11.6558
ENSMUSG00000095041	12251.9	1.02695	0.131825	7.79023	6.68894e-15	6.03788e-12	11.2191
ENSMUSG00000051599	387.954	1.41693	0.187427	7.55991	4.03355e-14	3.5235e-11	10.453
ENSMUSG00000024338	201.335	0.984754	0.130493	7.54642	4.47373e-14	3.78589e-11	10.4218
ENSMUSG00000022218	17.7919	3.29836	0.438995	7.51342	5.76008e-14	4.72676e-11	10.3254
ENSMUSG00000026605	117.838	-1.20237	0.160361	-7.49791	6.48436e-14	5.1646e-11	10.287
ENSMUSG00000096107	20.823	3.19669	0.426835	7.4893	6.92426e-14	5.3574e-11	10.271
ENSMUSG00000038540	55.7862	1.72345	0.230981	7.46144	8.55826e-14	6.43772e-11	10.1913
ENSMUSG00000038147	354.031	0.892541	0.119782	7.45137	9.2378e-14	6.76107e-11	10.17
ENSMUSG00000062488	295.526	1.07723	0.144643	7.44755	9.50924e-14	6.77659e-11	10.169
ENSMUSG00000047632	164.43	-1.09326	0.151783	-7.20281	5.89835e-13	3.99318e-10	9.39868
ENSMUSG00000041828	1944.1	0.961602	0.134103	7.17062	7.46604e-13	4.93123e-10	9.30704
ENSMUSG00000030921	284.783	1.02025	0.14281	7.14411	9.05786e-13	5.84016e-10	9.23358
ENSMUSG00000015355	56.0736	1.64504	0.234499	7.01514	2.29712e-12	1.44665e-09	8.83964
ENSMUSG00000046879	568.416	0.82795	0.119676	6.91829	4.57139e-12	2.81348e-09	8.55076
ENSMUSG00000023992	637.374	0.869396	0.12588	6.90655	4.96578e-12	2.9883e-09	8.52458
ENSMUSG00000040565	8367.33	-0.595944	0.0865913	-6.88226	5.89101e-12	3.46801e-09	8.45992
ENSMUSG00000074896	564.136	1.2806	0.186925	6.85087	7.34e-12	4.22909e-09	8.37375
ENSMUSG00000073555	43.7273	2.06206	0.302	6.82802	8.60938e-12	4.85712e-09	8.31362
ENSMUSG00000049436	92.9342	1.40826	0.206644	6.81492	9.43189e-12	5.21256e-09	8.28295
ENSMUSG00000073411	1819.13	0.874054	0.128397	6.80744	9.93525e-12	5.38093e-09	8.26914
ENSMUSG00000036896	2448.4	0.753751	0.11171	6.74736	1.5056e-11	7.99442e-09	8.09721
ENSMUSG00000030579	748.908	0.834087	0.12414	6.71893	1.83066e-11	9.53352e-09	8.02075
ENSMUSG00000004730	539.993	0.875981	0.130568	6.70901	1.95946e-11	1.00117e-08	7.99949
ENSMUSG00000038943	59.1739	-1.54298	0.231143	-6.67545	2.4647e-11	1.21353e-08	7.91595
ENSMUSG00000045689	619.683	0.881357	0.13202	6.67595	2.45641e-11	1.21353e-08	7.91595
ENSMUSG00000040552	169.375	0.989637	0.148444	6.66675	2.61521e-11	1.26464e-08	7.89803
ENSMUSG00000015340	84.694	1.13165	0.170054	6.65463	2.84004e-11	1.34927e-08	7.8699
ENSMUSG00000020914	137.061	-2.00342	0.302187	-6.62971	3.36344e-11	1.57038e-08	7.804
ENSMUSG00000073489	55.2457	1.74942	0.266787	6.55735	5.4771e-11	2.5139e-08	7.59965
ENSMUSG00000039891	241.412	0.724418	0.110887	6.53294	6.44893e-11	2.91062e-08	7.53601
ENSMUSG00000001025	477.208	1.01527	0.155622	6.52393	6.84898e-11	3.0405e-08	7.51706
ENSMUSG00000044043	1619.24	0.580476	0.0893681	6.49535	8.28427e-11	3.61836e-08	7.44149
ENSMUSG00000018774	301.708	0.673193	0.104058	6.46941	9.83892e-11	4.22917e-08	7.37374
ENSMUSG00000019787	28.9552	2.20109	0.34239	6.42861	1.2878e-10	5.36518e-08	7.27042
ENSMUSG00000078945	186.367	1.03998	0.16173	6.43032	1.27331e-10	5.36518e-08	7.27042
ENSMUSG00000020143	516.248	0.675431	0.105509	6.40167	1.53686e-10	6.21166e-08	7.20679
ENSMUSG00000073590	333.697	0.716889	0.11197	6.40253	1.52821e-10	6.21166e-08	7.20679
ENSMUSG00000000682	92.7561	1.58563	0.247937	6.39529	1.60245e-10	6.3815e-08	7.19508
ENSMUSG00000010461	460.714	0.613366	0.0962279	6.37409	1.84048e-10	7.2232e-08	7.14127
ENSMUSG00000026728	2285.95	0.704568	0.111003	6.34727	2.19165e-10	8.47856e-08	7.07168
ENSMUSG00000045502	11.6946	4.25094	0.672639	6.31979	2.61919e-10	9.98983e-08	7.00044
ENSMUSG00000020256	502.165	0.645936	0.10337	6.24878	4.13666e-10	1.55584e-07	6.80803
ENSMUSG00000104264	36.1176	1.67091	0.268197	6.23015	4.65987e-10	1.72862e-07	6.7623
ENSMUSG00000064267	191.707	0.843169	0.136077	6.19626	5.782e-10	2.1159e-07	6.6745
ENSMUSG00000001131	14.6917	3.09421	0.499562	6.19383	5.87188e-10	2.12014e-07	6.67364
ENSMUSG00000005087	242.104	0.955557	0.154978	6.16575	7.01482e-10	2.49949e-07	6.60215
ENSMUSG00000056737	167.055	1.03975	0.168869	6.15718	7.40516e-10	2.60431e-07	6.58431
ENSMUSG00000022548	10658.8	1.04671	0.17164	6.09833	1.07183e-09	3.72116e-07	6.42932
ENSMUSG00000021091	2692.95	0.958434	0.158377	6.05161	1.43408e-09	4.91581e-07	6.3084
ENSMUSG00000020120	1322.21	0.584625	0.0966413	6.04943	1.45358e-09	4.92036e-07	6.308
ENSMUSG00000097415	171.8	1.06054	0.17588	6.02992	1.64039e-09	5.48417e-07	6.26089
ENSMUSG00000047307	461.174	0.67403	0.112331	6.00041	1.96819e-09	6.49982e-07	6.1871
ENSMUSG00000037921	166.842	1.0272	0.171512	5.98912	2.1098e-09	6.88353e-07	6.16219
ENSMUSG00000060802	4081.09	0.646335	0.108034	5.98271	2.19451e-09	7.0747e-07	6.15029
ENSMUSG00000112148	23.7266	1.82731	0.30696	5.95293	2.63391e-09	8.39134e-07	6.07617
ENSMUSG00000036887	3062.42	0.692147	0.116495	5.94144	2.8253e-09	8.79415e-07	6.05581
ENSMUSG00000040204	14.3083	-2.86445	0.482108	-5.94152	2.82393e-09	8.79415e-07	6.05581
ENSMUSG00000051678	409.05	0.90971	0.153437	5.9289	3.04965e-09	9.38461e-07	6.02758
ENSMUSG00000068699	370.078	1.214	0.206891	5.86781	4.41593e-09	1.34363e-06	5.87172
ENSMUSG00000029005	33.2134	-1.56437	0.266945	-5.86027	4.62107e-09	1.39043e-06	5.85685
ENSMUSG00000061232	1371.49	0.793555	0.135632	5.85081	4.89191e-09	1.45575e-06	5.83691
ENSMUSG00000032446	12.18	-3.8336	0.663369	-5.77899	7.51522e-09	2.21209e-06	5.6552
ENSMUSG00000037321	217.295	0.734561	0.127471	5.76255	8.28524e-09	2.41252e-06	5.61753
ENSMUSG00000052160	386.967	0.604805	0.105137	5.75254	8.79124e-09	2.53263e-06	5.59643
ENSMUSG00000059182	1364.79	0.418536	0.0731112	5.72466	1.03642e-08	2.92591e-06	5.53374
ENSMUSG00000112968	20.0822	2.71325	0.47397	5.72452	1.03725e-08	2.92591e-06	5.53374
ENSMUSG00000026395	566.495	0.802253	0.140563	5.70743	1.14695e-08	3.202e-06	5.49458
ENSMUSG00000018927	96.7229	0.988053	0.174063	5.6764	1.37556e-08	3.80105e-06	5.4201
ENSMUSG00000036905	2055.77	0.682795	0.120584	5.66238	1.49285e-08	4.08348e-06	5.38897
ENSMUSG00000026285	12.0036	2.64633	0.469373	5.63802	1.72018e-08	4.65824e-06	5.33178
ENSMUSG00000034459	245.834	1.16288	0.206373	5.63481	1.75248e-08	4.69873e-06	5.32802
ENSMUSG00000000290	376.124	0.712641	0.127555	5.58691	2.31145e-08	6.13668e-06	5.21207
ENSMUSG00000006519	223.659	0.687341	0.1234	5.57004	2.54687e-08	6.69604e-06	5.17418
ENSMUSG00000026380	522.481	0.837512	0.153159	5.46826	4.54474e-08	1.18338e-05	4.92688
ENSMUSG00000043157	33.0245	1.39217	0.255479	5.44925	5.05838e-08	1.30458e-05	4.88453
ENSMUSG00000058715	269.317	0.610365	0.112298	5.43522	5.47303e-08	1.3982e-05	4.85443
ENSMUSG00000023031	64.5471	1.12613	0.207337	5.4314	5.59122e-08	1.41505e-05	4.84923
ENSMUSG00000023367	355.363	0.576058	0.106317	5.41832	6.01606e-08	1.50847e-05	4.82146
ENSMUSG00000040170	122.33	1.01644	0.187662	5.41632	6.08373e-08	1.51144e-05	4.82061
ENSMUSG00000045876	374.989	0.975457	0.180511	5.40387	6.52184e-08	1.60556e-05	4.79437
ENSMUSG00000033880	518.551	0.872259	0.161561	5.39893	6.70392e-08	1.62091e-05	4.79024
ENSMUSG00000073902	48.0114	1.30375	0.241446	5.39975	6.67354e-08	1.62091e-05	4.79024
ENSMUSG00000043943	207.806	0.934842	0.173629	5.38412	7.27993e-08	1.74461e-05	4.7583
ENSMUSG00000034810	481.67	0.732307	0.137298	5.33371	9.62235e-08	2.28573e-05	4.64097
ENSMUSG00000023186	1904.43	0.479611	0.0899586	5.33146	9.74262e-08	2.29418e-05	4.63937
ENSMUSG00000052229	2008.93	-0.812727	0.15314	-5.30709	1.1139e-07	2.60037e-05	4.58496
ENSMUSG00000091556	163.438	-0.761679	0.144021	-5.28868	1.23202e-07	2.85154e-05	4.54492
ENSMUSG00000026656	138.683	0.921068	0.174555	5.27666	1.31562e-07	3.01923e-05	4.5201
ENSMUSG00000059498	850.796	0.672651	0.127542	5.27395	1.33518e-07	3.03838e-05	4.51736
ENSMUSG00000025888	116.107	1.27465	0.243491	5.23492	1.65056e-07	3.72477e-05	4.4289
ENSMUSG00000050335	96.741	1.32569	0.253498	5.22958	1.69899e-07	3.80236e-05	4.41995
ENSMUSG00000074366	4.72504	5.71035	1.09419	5.2188	1.80083e-07	3.99724e-05	4.39824
ENSMUSG00000029307	168.446	0.738384	0.142272	5.18995	2.10352e-07	4.63117e-05	4.33431
ENSMUSG00000052469	11.7324	2.44482	0.474151	5.1562	2.52012e-07	5.50363e-05	4.25935
ENSMUSG00000074151	92.3135	1.21335	0.235605	5.14993	2.60581e-07	5.64523e-05	4.24832
ENSMUSG00000030107	86.6297	1.25372	0.243929	5.13969	2.75192e-07	5.91444e-05	4.22809
ENSMUSG00000018920	75.7118	1.1845	0.232106	5.10328	3.33817e-07	7.01003e-05	4.15428
ENSMUSG00000029561	172.482	1.13144	0.221711	5.10322	3.3392e-07	7.01003e-05	4.15428
ENSMUSG00000071203	79.3359	0.915079	0.179314	5.10321	3.33934e-07	7.01003e-05	4.15428
ENSMUSG00000056880	48.2995	1.12547	0.22083	5.09657	3.4587e-07	7.20474e-05	4.14238
ENSMUSG00000026177	120.209	0.900318	0.177278	5.07855	3.80318e-07	7.86185e-05	4.10448
ENSMUSG00000115422	28.2571	-1.55191	0.308284	-5.03401	4.80324e-07	9.85391e-05	4.00639
ENSMUSG00000033355	119.25	0.932467	0.185735	5.02042	5.15583e-07	0.000104932	3.97909
ENSMUSG00000051486	781.616	0.581526	0.115863	5.01906	5.19237e-07	0.000104932	3.97909
ENSMUSG00000043458	753.111	0.609295	0.121506	5.01454	5.31595e-07	0.000106634	3.9721
ENSMUSG00000051506	248.826	0.525016	0.104896	5.00509	5.58367e-07	0.000111181	3.95397
ENSMUSG00000016256	1472.8	0.545069	0.108955	5.00268	5.654e-07	0.000111759	3.95172
ENSMUSG00000029919	612.979	0.425295	0.0854912	4.97472	6.53404e-07	0.000128219	3.89205
ENSMUSG00000063286	369.609	0.6843	0.137953	4.96037	7.03591e-07	0.000137074	3.86305
ENSMUSG00000018819	178.044	1.11011	0.224007	4.95569	7.20724e-07	0.000139409	3.85571
ENSMUSG00000040483	259.546	0.715661	0.144867	4.94013	7.80688e-07	0.000149936	3.82409
ENSMUSG00000028362	12.5353	2.5777	0.526926	4.89195	9.98412e-07	0.000190401	3.72033
ENSMUSG00000033777	250.973	0.721684	0.147591	4.88974	1.00969e-06	0.000191205	3.7185
ENSMUSG00000038507	727.593	0.391932	0.0803125	4.88009	1.06038e-06	0.00019941	3.70025
ENSMUSG00000050708	4778.74	0.333617	0.0686114	4.86242	1.1596e-06	0.000216566	3.66441
ENSMUSG00000098132	58.4588	-1.01225	0.208831	-4.84724	1.25189e-06	0.0002322	3.63414
ENSMUSG00000027932	184.449	-0.683229	0.141112	-4.84176	1.28696e-06	0.000237081	3.6251
ENSMUSG00000029762	48.6104	1.19113	0.246207	4.83791	1.31212e-06	0.000240083	3.61964
ENSMUSG00000053541	12.3132	2.28265	0.472653	4.82944	1.36917e-06	0.00024884	3.60408
ENSMUSG00000079017	45.469	1.86818	0.386948	4.82797	1.37929e-06	0.000249008	3.60379
ENSMUSG00000063234	50.2462	0.94173	0.195285	4.82234	1.41885e-06	0.000254453	3.59439
ENSMUSG00000102516	90.0957	1.26607	0.262892	4.81594	1.46509e-06	0.000261018	3.58333
ENSMUSG00000078853	206.954	0.685706	0.142609	4.80829	1.52227e-06	0.000269431	3.56955
ENSMUSG00000041460	153.297	-0.939422	0.195735	-4.79946	1.59093e-06	0.000279755	3.55322
ENSMUSG00000104713	47.1092	1.01693	0.212398	4.78786	1.68568e-06	0.000294504	3.53091
ENSMUSG00000025592	108.645	0.828886	0.17391	4.76617	1.87761e-06	0.000325933	3.48687
ENSMUSG00000044338	24.3618	-1.52548	0.322165	-4.73508	2.1897e-06	0.000377688	3.42287
ENSMUSG00000039264	8.8891	2.71132	0.574387	4.72038	2.35406e-06	0.000403468	3.39419
ENSMUSG00000034855	21.0639	1.79683	0.380994	4.71615	2.40343e-06	0.00040934	3.38792
ENSMUSG00000026548	44.677	1.38164	0.293096	4.71397	2.42934e-06	0.000411165	3.38598
ENSMUSG00000024501	3310.04	-0.397438	0.0844136	-4.70823	2.49883e-06	0.0004203	3.37644
ENSMUSG00000001228	52.4127	-1.06779	0.227567	-4.69222	2.70254e-06	0.000451758	3.34509
ENSMUSG00000074704	67.9748	0.932205	0.199898	4.66339	3.11036e-06	0.000516739	3.28673
ENSMUSG00000020399	213.59	0.743773	0.159566	4.66121	3.14351e-06	0.000519062	3.28478
ENSMUSG00000028364	692.951	-1.1719	0.252243	-4.64591	3.38577e-06	0.000553167	3.25714
ENSMUSG00000097194	8.63048	2.56705	0.552577	4.6456	3.3909e-06	0.000553167	3.25714
ENSMUSG00000070327	2472.18	0.505839	0.10893	4.6437	3.42233e-06	0.000554949	3.25575
ENSMUSG00000021213	21.0773	1.65451	0.357089	4.63332	3.59855e-06	0.000573492	3.24147
ENSMUSG00000025479	23.2719	2.02583	0.43724	4.63322	3.60021e-06	0.000573492	3.24147
ENSMUSG00000068245	46.5645	1.02928	0.22206	4.63515	3.56684e-06	0.000573492	3.24147
ENSMUSG00000063632	1514.18	-0.633467	0.136836	-4.62939	3.66749e-06	0.000580793	3.23598
ENSMUSG00000029484	600.124	0.432723	0.093596	4.62331	3.77671e-06	0.000594612	3.22577
ENSMUSG00000051663	30.2106	1.59327	0.345425	4.6125	3.97861e-06	0.000622779	3.20567
ENSMUSG00000073409	17.5649	2.42923	0.527115	4.60854	4.0551e-06	0.000631103	3.1999
ENSMUSG00000030223	2476.23	-0.591126	0.129732	-4.55651	5.20094e-06	0.000804289	3.09459
ENSMUSG00000030966	222.04	0.562479	0.123474	4.55545	5.22728e-06	0.000804289	3.09459
ENSMUSG00000021423	651.488	0.595394	0.130791	4.55224	5.3078e-06	0.000812063	3.09041
ENSMUSG00000024300	245.253	0.677893	0.14917	4.54443	5.50833e-06	0.000833327	3.07918
ENSMUSG00000092624	21.0528	2.53751	0.558266	4.54534	5.48455e-06	0.000833327	3.07918
ENSMUSG00000071068	24.951	1.48032	0.326616	4.53228	5.83513e-06	0.000877863	3.05657
ENSMUSG00000028859	265.347	0.56338	0.124544	4.52353	6.0818e-06	0.000909919	3.041
ENSMUSG00000000031	12.9677	-2.4877	0.550389	-4.51989	6.18712e-06	0.00092059	3.03593
ENSMUSG00000058818	30.2535	1.28262	0.28385	4.51867	6.22298e-06	0.000920865	3.0358
ENSMUSG00000032690	32.691	1.33031	0.294541	4.51654	6.2857e-06	0.000925091	3.03382
ENSMUSG00000041596	1019.36	1.0974	0.243246	4.51148	6.43782e-06	0.000942358	3.02578
ENSMUSG00000043263	22.2282	1.70052	0.377316	4.50688	6.57865e-06	0.000957794	3.01873
ENSMUSG00000028864	498.826	0.813403	0.180718	4.50096	6.76478e-06	0.000979627	3.00894
ENSMUSG00000005397	482.965	-0.493615	0.109705	-4.49946	6.81255e-06	0.000981296	3.0082
ENSMUSG00000001506	142.63	-1.16326	0.258663	-4.49721	6.88497e-06	0.000986481	3.00591
ENSMUSG00000047250	817.49	0.424401	0.0944805	4.49195	7.05756e-06	0.00100589	2.99745
ENSMUSG00000022033	22.0779	-2.04269	0.45531	-4.48637	7.2448e-06	0.00101786	2.99231
ENSMUSG00000090675	12.2059	2.37347	0.528952	4.48712	7.21917e-06	0.00101786	2.99231
ENSMUSG00000103332	794.364	0.630457	0.140536	4.48609	7.25432e-06	0.00101786	2.99231
ENSMUSG00000117239	3.78238	4.78085	1.06764	4.47794	7.53671e-06	0.00105203	2.97797
ENSMUSG00000044811	178.978	0.888701	0.198828	4.4697	7.83301e-06	0.00108778	2.96346
ENSMUSG00000030796	77.4529	-0.782527	0.17567	-4.45454	8.40739e-06	0.00116159	2.93495
ENSMUSG00000026043	252.803	-1.06804	0.239895	-4.45209	8.50382e-06	0.00116895	2.9322
ENSMUSG00000084890	1182.7	0.463988	0.104271	4.44984	8.5935e-06	0.00117531	2.92985
ENSMUSG00000063687	440.843	0.803651	0.180842	4.44394	8.83281e-06	0.00120197	2.92011
ENSMUSG00000076431	923.328	-0.372786	0.084017	-4.43703	9.12106e-06	0.00123499	2.90834
ENSMUSG00000096727	67.9559	0.955134	0.215404	4.43416	9.24327e-06	0.00124531	2.90472
ENSMUSG00000047735	786.665	0.748421	0.16909	4.42617	9.59203e-06	0.0012859	2.89079
ENSMUSG00000076617	719.754	1.01179	0.229751	4.40385	1.06348e-05	0.00141424	2.84948
ENSMUSG00000114479	93.9786	1.37917	0.313202	4.40346	1.06538e-05	0.00141424	2.84948
ENSMUSG00000038224	49.2933	1.10754	0.25297	4.37815	1.19692e-05	0.00158111	2.80104
ENSMUSG00000026628	71.3522	1.13581	0.26018	4.36547	1.2685e-05	0.00166752	2.77793
ENSMUSG00000029994	269.472	0.621727	0.142773	4.35465	1.33278e-05	0.00174356	2.75856
ENSMUSG00000028971	245.924	0.731104	0.16814	4.34818	1.3727e-05	0.00178715	2.74784
ENSMUSG00000117254	757.271	0.864032	0.198766	4.34697	1.38032e-05	0.00178847	2.74752
ENSMUSG00000024397	251.564	0.596687	0.137337	4.34469	1.39472e-05	0.00179853	2.74508
ENSMUSG00000026303	71.0391	0.768626	0.177011	4.34224	1.41036e-05	0.00179886	2.745
ENSMUSG00000048521	6.86994	3.39749	0.782554	4.34153	1.41491e-05	0.00179886	2.745
ENSMUSG00000053977	6.13671	3.52794	0.812318	4.34306	1.40515e-05	0.00179886	2.745
ENSMUSG00000104674	320.717	0.873544	0.201318	4.33913	1.43045e-05	0.00181013	2.74229
ENSMUSG00000025578	423.884	-0.634002	0.146481	-4.32821	1.50327e-05	0.00189342	2.72275
ENSMUSG00000002847	62.3822	0.834105	0.19339	4.31308	1.60999e-05	0.0019871	2.70178
ENSMUSG00000004709	6.94451	2.75673	0.639244	4.31248	1.61433e-05	0.0019871	2.70178
ENSMUSG00000024334	18.0531	1.46752	0.34025	4.31306	1.61007e-05	0.0019871	2.70178
ENSMUSG00000055172	116.502	0.658931	0.152777	4.31303	1.61035e-05	0.0019871	2.70178
ENSMUSG00000113088	51.3297	1.10943	0.257185	4.31374	1.60518e-05	0.0019871	2.70178
ENSMUSG00000049502	697.172	0.487933	0.113204	4.3102	1.63108e-05	0.00199863	2.69927
ENSMUSG00000045657	470.191	0.437914	0.10176	4.30339	1.68208e-05	0.00205183	2.68786
ENSMUSG00000029413	2036.53	0.367786	0.0855366	4.29975	1.70988e-05	0.00207639	2.68269
ENSMUSG00000057346	7.82858	2.8728	0.669341	4.29198	1.77089e-05	0.00214088	2.66941
ENSMUSG00000033952	71.2097	-1.16997	0.272714	-4.2901	1.78594e-05	0.00214947	2.66767
ENSMUSG00000021998	720.035	0.437644	0.102159	4.28394	1.83616e-05	0.00220014	2.65755
ENSMUSG00000022488	829.98	0.440286	0.102925	4.27772	1.88818e-05	0.00225251	2.64733
ENSMUSG00000066842	800.116	-0.454097	0.106209	-4.27551	1.907e-05	0.00226499	2.64493
ENSMUSG00000012819	174.637	0.698704	0.163486	4.27379	1.92177e-05	0.00227256	2.64348
ENSMUSG00000023249	212.867	0.50102	0.117488	4.26442	2.00422e-05	0.00235975	2.62713
ENSMUSG00000114189	28.0567	1.28701	0.301909	4.26291	2.0178e-05	0.00236546	2.62608
ENSMUSG00000044626	60.2684	0.986746	0.231532	4.26181	2.02782e-05	0.00236696	2.62581
ENSMUSG00000106086	10.74	-1.94801	0.45766	-4.25645	2.07696e-05	0.00241391	2.61728
ENSMUSG00000020649	57.7245	-0.948814	0.22397	-4.23635	2.27184e-05	0.00262912	2.58019
ENSMUSG00000032323	85.9082	-0.806007	0.190869	-4.22283	2.41249e-05	0.00278001	2.55595
ENSMUSG00000100832	5.70048	-3.39398	0.805062	-4.2158	2.48897e-05	0.00285599	2.54424
ENSMUSG00000036908	636.577	0.391482	0.0930534	4.20707	2.58705e-05	0.002956	2.5293
ENSMUSG00000026896	488.488	0.572412	0.136179	4.20337	2.62968e-05	0.00299209	2.52403
ENSMUSG00000034422	488.795	0.618421	0.147296	4.19849	2.68695e-05	0.00304446	2.51649
ENSMUSG00000070469	262.406	0.947082	0.226084	4.18906	2.80107e-05	0.00316054	2.50024
ENSMUSG00000057337	152.674	-0.871809	0.208215	-4.18706	2.82592e-05	0.00317535	2.49821
ENSMUSG00000015950	383.245	0.472848	0.113137	4.17944	2.9223e-05	0.00327008	2.48544
ENSMUSG00000026480	287.87	0.479817	0.114913	4.17547	2.97374e-05	0.00331394	2.47965
ENSMUSG00000035352	25.7574	1.30686	0.313894	4.1634	3.1355e-05	0.00347989	2.45843
ENSMUSG00000030124	122.287	0.812619	0.195489	4.15686	3.22653e-05	0.0035663	2.44778
ENSMUSG00000064215	1399	0.539317	0.129793	4.15522	3.24981e-05	0.00357744	2.44643
ENSMUSG00000004266	248.167	0.622247	0.149811	4.15355	3.27358e-05	0.00358901	2.44503
ENSMUSG00000045498	246.103	1.00935	0.243752	4.14088	3.45982e-05	0.00377222	2.4234
ENSMUSG00000104093	364.044	0.800444	0.19333	4.1403	3.46855e-05	0.00377222	2.4234
ENSMUSG00000032034	23.9491	-1.41095	0.340861	-4.13937	3.48265e-05	0.00377241	2.42338
ENSMUSG00000040751	113.116	0.685186	0.165699	4.13512	3.5477e-05	0.00382306	2.41759
ENSMUSG00000117733	12.6682	-1.88011	0.454739	-4.13448	3.55765e-05	0.00382306	2.41759
ENSMUSG00000025498	85.2952	1.11748	0.270392	4.13283	3.58324e-05	0.00383534	2.4162
ENSMUSG00000003283	141.947	0.674136	0.163381	4.12617	3.68855e-05	0.00390179	2.40874
ENSMUSG00000035929	154.172	0.827476	0.200522	4.12661	3.6815e-05	0.00390179	2.40874
ENSMUSG00000072721	4.77264	4.51793	1.09491	4.12631	3.68631e-05	0.00390179	2.40874
ENSMUSG00000030793	210.709	0.608619	0.147599	4.12346	3.73228e-05	0.00393269	2.40531
ENSMUSG00000024534	208.939	-0.758351	0.183976	-4.12201	3.75579e-05	0.00394213	2.40427
ENSMUSG00000105562	11.4511	-2.07853	0.504628	-4.11893	3.80633e-05	0.00397975	2.40014
ENSMUSG00000073164	17.8205	-1.43621	0.348913	-4.11625	3.85092e-05	0.00401088	2.39676
ENSMUSG00000031790	377.366	-0.804129	0.19637	-4.09497	4.2222e-05	0.00438074	2.35845
ENSMUSG00000092312	6.62635	3.65948	0.894389	4.0916	4.28414e-05	0.00442804	2.35379
ENSMUSG00000026347	303.625	-0.862111	0.211026	-4.08533	4.40151e-05	0.00450557	2.34625
ENSMUSG00000050103	596.453	0.517478	0.126645	4.08605	4.38788e-05	0.00450557	2.34625
ENSMUSG00000069310	13.4837	-1.97475	0.483423	-4.08493	4.40907e-05	0.00450557	2.34625
ENSMUSG00000108113	24.8155	1.25586	0.308195	4.07489	4.60357e-05	0.00468664	2.32914
ENSMUSG00000027356	88.6563	1.09837	0.269835	4.07052	4.69084e-05	0.00473985	2.32424
ENSMUSG00000069792	21.5563	1.30744	0.321177	4.07078	4.68566e-05	0.00473985	2.32424
ENSMUSG00000028339	193.029	-0.585008	0.143976	-4.06322	4.83997e-05	0.00487235	2.31226
ENSMUSG00000032434	1426.24	0.321882	0.0795183	4.0479	5.16784e-05	0.00518315	2.28541
ENSMUSG00000056290	8.11636	2.3829	0.588825	4.04688	5.19052e-05	0.00518669	2.28511
ENSMUSG00000064358	1155.81	-3.05891	0.757556	-4.03787	5.39397e-05	0.00537017	2.27001
ENSMUSG00000084887	46.4584	-1.04653	0.259718	-4.02948	5.59008e-05	0.00552479	2.25768
ENSMUSG00000110631	98.7348	-1.194	0.296283	-4.02994	5.5792e-05	0.00552479	2.25768
ENSMUSG00000022817	2656.62	0.382936	0.0951061	4.02641	5.6636e-05	0.0055771	2.25359
ENSMUSG00000008540	470.577	0.52286	0.130138	4.01772	5.87627e-05	0.00574475	2.24073
ENSMUSG00000069267	26.4292	-1.58635	0.394756	-4.01856	5.85558e-05	0.00574475	2.24073
ENSMUSG00000048752	12.5273	1.76198	0.438726	4.01613	5.91611e-05	0.00576289	2.23936
ENSMUSG00000009670	34.2668	1.38002	0.344396	4.00707	6.14757e-05	0.00594557	2.22581
ENSMUSG00000022146	751.931	0.815467	0.203493	4.00736	6.14025e-05	0.00594557	2.22581
ENSMUSG00000024985	667.431	-0.978646	0.244443	-4.00358	6.23917e-05	0.0060127	2.22093
ENSMUSG00000029168	410.016	-0.729869	0.182451	-4.00037	6.32444e-05	0.00607326	2.21658
ENSMUSG00000040296	538.893	0.434467	0.108635	3.99931	6.35269e-05	0.00607883	2.21618
ENSMUSG00000024810	4078.32	0.668771	0.167355	3.99613	6.43863e-05	0.00613937	2.21188
ENSMUSG00000000982	21.0458	1.30441	0.326671	3.99304	6.5232e-05	0.00616123	2.21033
ENSMUSG00000059089	11.8255	1.88047	0.47082	3.99403	6.49609e-05	0.00616123	2.21033
ENSMUSG00000089797	11.2261	1.75807	0.440389	3.99209	6.54932e-05	0.00616123	2.21033
ENSMUSG00000110649	99.5374	0.720534	0.180496	3.99197	6.55257e-05	0.00616123	2.21033
ENSMUSG00000046718	124.045	0.65216	0.163847	3.98029	6.88317e-05	0.00644969	2.19046
ENSMUSG00000021665	7663.61	0.516354	0.130318	3.96227	7.42408e-05	0.00693256	2.15911
ENSMUSG00000017724	227.339	-0.511404	0.12928	-3.95578	7.62859e-05	0.00707473	2.15029
ENSMUSG00000039005	291.361	0.695908	0.175904	3.95617	7.61606e-05	0.00707473	2.15029
ENSMUSG00000022912	1293.05	0.441173	0.111683	3.95021	7.80812e-05	0.00720981	2.14208
ENSMUSG00000064246	504.841	0.520188	0.131706	3.94962	7.82749e-05	0.00720981	2.14208
ENSMUSG00000024965	232.563	0.498865	0.126695	3.93752	8.23297e-05	0.00753205	2.12309
ENSMUSG00000035208	109.285	0.823396	0.209106	3.93769	8.22688e-05	0.00753205	2.12309
ENSMUSG00000003779	43.437	-0.889858	0.226071	-3.93618	8.27888e-05	0.00754676	2.12224
ENSMUSG00000047117	22.7083	1.26244	0.320788	3.93543	8.30478e-05	0.00754676	2.12224
ENSMUSG00000049109	8.01873	2.04861	0.520786	3.93369	8.36509e-05	0.00755089	2.122
ENSMUSG00000100586	28.5357	1.30288	0.33119	3.93394	8.35663e-05	0.00755089	2.122
ENSMUSG00000021680	1163.13	0.550195	0.140013	3.92959	8.50915e-05	0.00760488	2.11891
ENSMUSG00000030798	95.6535	0.59825	0.152221	3.93014	8.48959e-05	0.00760488	2.11891
ENSMUSG00000033208	6320.11	0.419975	0.106863	3.93004	8.49315e-05	0.00760488	2.11891
ENSMUSG00000069170	443.649	-0.808817	0.205989	-3.92651	8.61857e-05	0.0076584	2.11586
ENSMUSG00000098108	10.9986	1.70127	0.433299	3.92632	8.6256e-05	0.0076584	2.11586
ENSMUSG00000012443	171.642	-0.708766	0.181504	-3.90496	9.42423e-05	0.00834014	2.07883
ENSMUSG00000031387	136.281	0.621529	0.15978	3.88991	0.000100282	0.00884574	2.05327
ENSMUSG00000033488	298.918	0.474017	0.122122	3.8815	0.000103816	0.00912771	2.03964
ENSMUSG00000114083	31.8147	-1.2817	0.330884	-3.87357	0.000107255	0.00939953	2.02689
ENSMUSG00000035202	970.712	0.501386	0.129527	3.8709	0.000108434	0.00947227	2.02355
ENSMUSG00000025355	89.3777	0.840967	0.217417	3.86798	0.000109739	0.00952488	2.02114
ENSMUSG00000044827	46.6677	0.85367	0.220702	3.86798	0.00010974	0.00952488	2.02114
ENSMUSG00000032744	85.8367	-0.687399	0.178304	-3.8552	0.000115635	0.00997259	2.00119
ENSMUSG00000034486	30.9342	-1.2519	0.324673	-3.85588	0.000115312	0.00997259	2.00119
ENSMUSG00000024376	165.181	-0.600867	0.15659	-3.8372	0.000124446	0.0106984	1.97068
ENSMUSG00000032369	119.022	0.713615	0.186218	3.83215	0.000127026	0.0108857	1.96314
ENSMUSG00000027399	62.7773	0.695689	0.181821	3.82622	0.000130125	0.0110784	1.95552
ENSMUSG00000029490	56.9224	0.8098	0.211722	3.82482	0.000130865	0.0110784	1.95552
ENSMUSG00000044518	2.41221	4.72712	1.23593	3.82474	0.000130911	0.0110784	1.95552
ENSMUSG00000104572	18.5228	1.47501	0.385589	3.82535	0.000130584	0.0110784	1.95552
ENSMUSG00000055541	864.837	0.430073	0.112603	3.81939	0.000133782	0.011286	1.94746
ENSMUSG00000025577	100.409	-0.727439	0.19083	-3.81198	0.00013786	0.0115939	1.93577
ENSMUSG00000037725	38.5442	-0.985625	0.258777	-3.80878	0.000139654	0.0116364	1.93418
ENSMUSG00000052776	42.1032	0.954072	0.250477	3.80901	0.000139522	0.0116364	1.93418
ENSMUSG00000079057	461.583	0.403781	0.106003	3.80913	0.000139455	0.0116364	1.93418
ENSMUSG00000028640	5.25127	-2.95362	0.775796	-3.80721	0.000140542	0.0116745	1.93276
ENSMUSG00000074634	1059.38	0.673618	0.177079	3.80406	0.000142344	0.011788	1.92856
ENSMUSG00000028270	398.89	0.553769	0.145708	3.80055	0.000144372	0.0119195	1.92374
ENSMUSG00000048489	77.2946	1.35461	0.356753	3.79704	0.000146432	0.0120529	1.91891
ENSMUSG00000028268	378.11	0.710802	0.1876	3.78893	0.000151297	0.0124155	1.90603
ENSMUSG00000024079	625.18	0.502622	0.132765	3.7858	0.000153216	0.012535	1.90188
ENSMUSG00000055413	9.52084	2.01037	0.531879	3.77974	0.00015699	0.0128051	1.89262
ENSMUSG00000037411	44.2005	0.907317	0.240169	3.77783	0.000158199	0.0128649	1.89059
ENSMUSG00000113320	18.7809	-1.68437	0.446063	-3.77607	0.000159319	0.0129172	1.88883
ENSMUSG00000007041	315.768	0.493238	0.130956	3.76643	0.000165596	0.0133195	1.87551
ENSMUSG00000032089	294.093	0.490896	0.130343	3.76619	0.000165755	0.0133195	1.87551
ENSMUSG00000091649	20.787	1.4418	0.382817	3.76628	0.000165699	0.0133195	1.87551
ENSMUSG00000106734	143.174	0.588847	0.156608	3.76	0.000169912	0.013613	1.86604
ENSMUSG00000004609	439.418	0.487141	0.130203	3.7414	0.000183001	0.0146185	1.8351
ENSMUSG00000027985	411.877	-0.949352	0.253963	-3.73815	0.000185382	0.0147651	1.83076
ENSMUSG00000029090	1222.94	-0.357828	0.0957602	-3.73671	0.00018644	0.0148059	1.82957
ENSMUSG00000036560	1816.93	0.339525	0.0908892	3.73559	0.000187278	0.0148289	1.82889
ENSMUSG00000029026	98.6348	-0.908921	0.243562	-3.73179	0.000190125	0.0150105	1.82361
ENSMUSG00000087700	11.778	1.68674	0.454287	3.71294	0.000204863	0.016127	1.79245
ENSMUSG00000009185	6.87935	2.55132	0.687997	3.70833	0.000208629	0.0163758	1.7858
ENSMUSG00000043613	4.07374	4.25273	1.14808	3.70421	0.000212053	0.0165965	1.77998
ENSMUSG00000040229	959.093	0.470524	0.127246	3.69776	0.000217511	0.0169746	1.7702
ENSMUSG00000002985	66575.2	0.330441	0.0894058	3.69597	0.000219049	0.0169967	1.76964
ENSMUSG00000114822	11.6649	1.61913	0.438021	3.69647	0.000218616	0.0169967	1.76964
ENSMUSG00000084350	199.382	0.632152	0.171192	3.69266	0.000221924	0.0171706	1.76521
ENSMUSG00000032554	26751.7	0.806632	0.218998	3.68329	0.000230246	0.0177637	1.75047
ENSMUSG00000022575	138.155	0.482429	0.131164	3.67808	0.000235	0.0180673	1.74311
ENSMUSG00000034918	32.814	1.05522	0.287002	3.67669	0.000236278	0.0180673	1.74311
ENSMUSG00000041538	30.0143	1.26801	0.34482	3.67732	0.0002357	0.0180673	1.74311
ENSMUSG00000068246	9.55229	1.79828	0.489186	3.67608	0.000236849	0.0180673	1.74311
ENSMUSG00000029343	93.6467	0.690659	0.18827	3.66845	0.000244028	0.0185626	1.73136
ENSMUSG00000100837	92.1646	0.645073	0.175941	3.66641	0.000245975	0.0186583	1.72913
ENSMUSG00000020467	687.8	0.458245	0.125108	3.66278	0.000249494	0.0188197	1.72539
ENSMUSG00000066477	48.9221	1.46557	0.400097	3.66303	0.000249253	0.0188197	1.72539
ENSMUSG00000000673	10.9237	1.52436	0.416388	3.66091	0.000251321	0.0189049	1.72343
ENSMUSG00000028976	288.564	0.492134	0.134568	3.65715	0.000255034	0.0191311	1.71826
ENSMUSG00000026928	72.851	0.629863	0.172834	3.64432	0.000268098	0.0200156	1.69863
ENSMUSG00000098758	37.7475	1.34694	0.369621	3.64412	0.000268304	0.0200156	1.69863
ENSMUSG00000022906	377.163	0.417515	0.114641	3.64193	0.000270598	0.0201313	1.69613
ENSMUSG00000000386	22.4732	1.44824	0.397838	3.64027	0.000272354	0.0202064	1.69451
ENSMUSG00000022901	151.488	0.640553	0.176086	3.63773	0.000275049	0.0203506	1.69142
ENSMUSG00000027329	235.471	-0.456339	0.125488	-3.63653	0.000276334	0.02039	1.69058
ENSMUSG00000071713	67.6237	0.771938	0.212377	3.63476	0.000278243	0.020475	1.68878
ENSMUSG00000056144	177.932	0.555678	0.153065	3.63034	0.000283044	0.0207719	1.68252
ENSMUSG00000021448	4258.21	-0.447052	0.123312	-3.62537	0.000288548	0.0211186	1.67533
ENSMUSG00000048865	261.464	0.444912	0.122751	3.62451	0.000289507	0.0211317	1.67507
ENSMUSG00000028874	10.7153	1.65139	0.456846	3.61477	0.000300612	0.0218833	1.65989
ENSMUSG00000063297	12966.8	0.42816	0.118534	3.61213	0.000303687	0.0220479	1.65663
ENSMUSG00000071178	2.45779	4.78433	1.32618	3.60759	0.000309051	0.0223773	1.65019
ENSMUSG00000053318	12.533	1.4647	0.406134	3.60646	0.000310404	0.0224153	1.64945
ENSMUSG00000089679	83.7572	0.95587	0.266162	3.59131	0.000329025	0.0236968	1.62531
ENSMUSG00000105096	10.6446	1.57457	0.438677	3.58937	0.000331484	0.0238106	1.62323
ENSMUSG00000100009	197.516	0.537657	0.149998	3.58444	0.000337805	0.0242004	1.61618
ENSMUSG00000032372	142.98	0.808856	0.226095	3.57751	0.000346877	0.0247195	1.60696
ENSMUSG00000054435	26.5354	0.953776	0.266595	3.57762	0.000346738	0.0247195	1.60696
ENSMUSG00000025877	91.745	0.641998	0.179561	3.57538	0.000349714	0.0248563	1.60456
ENSMUSG00000039976	1601.13	-0.491148	0.137625	-3.56873	0.000358713	0.0253628	1.5958
ENSMUSG00000075437	182.38	0.79351	0.222416	3.56769	0.000360145	0.0253977	1.59521
ENSMUSG00000015484	454.217	-0.710169	0.199507	-3.55961	0.000371404	0.0257888	1.58857
ENSMUSG00000015947	124.725	0.798923	0.224431	3.55977	0.000371182	0.0257888	1.58857
ENSMUSG00000021876	846.997	0.443659	0.1246	3.56067	0.000369913	0.0257888	1.58857
ENSMUSG00000028970	421.533	0.357945	0.100527	3.56067	0.000369916	0.0257888	1.58857
ENSMUSG00000044350	371.174	0.418415	0.117489	3.56132	0.000368997	0.0257888	1.58857
ENSMUSG00000108218	34.1554	0.929152	0.260844	3.5621	0.000367898	0.0257888	1.58857
ENSMUSG00000086537	25.2387	-0.975649	0.274212	-3.55801	0.000373676	0.0258141	1.58814
ENSMUSG00000104519	20.3872	-1.11815	0.314217	-3.55853	0.00037294	0.0258141	1.58814
ENSMUSG00000035273	32.5251	0.871324	0.244985	3.55664	0.000375628	0.0258517	1.58751
ENSMUSG00000063626	1933.96	0.423449	0.11907	3.55629	0.000376129	0.0258517	1.58751
ENSMUSG00000020097	2261.21	0.280029	0.0787701	3.55501	0.000377959	0.0259117	1.5865
ENSMUSG00000026922	56.3442	0.740658	0.20848	3.55266	0.00038136	0.0260145	1.58478
ENSMUSG00000042228	689.011	0.36564	0.102967	3.55104	0.000383717	0.0260145	1.58478
ENSMUSG00000053399	71.1766	-0.965587	0.271844	-3.55199	0.000382331	0.0260145	1.58478
ENSMUSG00000074001	230.746	0.484207	0.136396	3.55002	0.000385195	0.0260145	1.58478
ENSMUSG00000109209	26.725	1.10361	0.310875	3.55001	0.000385222	0.0260145	1.58478
ENSMUSG00000112023	17.6403	1.61128	0.453751	3.55102	0.000383744	0.0260145	1.58478
ENSMUSG00000030111	953.732	0.830325	0.233937	3.54935	0.000386187	0.0260148	1.58478
ENSMUSG00000046688	425.017	0.403865	0.11384	3.54766	0.000388676	0.0261175	1.58307
ENSMUSG00000061991	8.15376	-1.80342	0.509583	-3.539	0.000401639	0.0269217	1.5699
ENSMUSG00000027860	356.133	-0.719064	0.203333	-3.53638	0.000405646	0.0271232	1.56666
ENSMUSG00000001665	79.0484	0.611551	0.173201	3.53089	0.000414172	0.027625	1.5587
ENSMUSG00000031647	6034.12	0.348742	0.0988386	3.5284	0.000418084	0.0277493	1.55675
ENSMUSG00000035004	52.9959	0.850065	0.240882	3.52898	0.000417172	0.0277493	1.55675
ENSMUSG00000058773	98.6329	-0.744361	0.211532	-3.5189	0.000433347	0.028692	1.54224
ENSMUSG00000019942	19.5285	-1.51782	0.431618	-3.51657	0.000437162	0.0288038	1.54055
ENSMUSG00000062760	2845.69	-0.503607	0.143197	-3.51689	0.000436635	0.0288038	1.54055
ENSMUSG00000078942	58.6841	0.730635	0.207824	3.51565	0.000438677	0.0288334	1.5401
ENSMUSG00000024978	6452.23	0.240605	0.0685394	3.51046	0.000447336	0.0293314	1.53267
ENSMUSG00000058498	118.167	0.539703	0.153791	3.50934	0.000449227	0.0293842	1.53189
ENSMUSG00000011171	210.524	-0.895356	0.255571	-3.50335	0.000459442	0.02998	1.52317
ENSMUSG00000052912	17.3286	1.60046	0.457901	3.49522	0.000473678	0.0308346	1.51096
ENSMUSG00000031877	4.75045	3.16657	0.910669	3.47719	0.000506691	0.0328258	1.48378
ENSMUSG00000078920	62.0358	0.720895	0.207289	3.47772	0.000505698	0.0328258	1.48378
ENSMUSG00000041736	137.005	0.801501	0.230693	3.47433	0.000512137	0.0330994	1.48018
ENSMUSG00000032231	444.813	0.515485	0.148529	3.47061	0.000519282	0.0334813	1.4752
ENSMUSG00000106220	74.1146	-0.883868	0.25482	-3.46859	0.00052319	0.0336532	1.47297
ENSMUSG00000000562	38.3586	0.828954	0.239038	3.46787	0.000524602	0.033664	1.47283
ENSMUSG00000100313	13.6481	-1.34934	0.389535	-3.46397	0.000532264	0.034075	1.46756
ENSMUSG00000034923	36.9856	1.20495	0.348414	3.45838	0.000543439	0.0347084	1.45957
ENSMUSG00000038007	498.957	0.826542	0.239516	3.45089	0.000558751	0.0356023	1.44852
ENSMUSG00000063446	456.107	-0.544494	0.157839	-3.44967	0.000561269	0.0356788	1.44759
ENSMUSG00000044583	216.921	0.538287	0.15618	3.44658	0.000567726	0.0360047	1.44364
ENSMUSG00000029096	61.877	0.857057	0.248746	3.44551	0.000569978	0.0360631	1.44294
ENSMUSG00000029162	192.582	0.434994	0.126327	3.44341	0.000574424	0.0362597	1.44058
ENSMUSG00000065987	8.44138	1.79532	0.521743	3.44101	0.000579557	0.0364986	1.43772
ENSMUSG00000020262	11831.3	-0.404375	0.117538	-3.44037	0.000580913	0.0364991	1.43772
ENSMUSG00000024621	5938.41	0.306411	0.0892032	3.43498	0.000592603	0.0371475	1.43007
ENSMUSG00000024679	83.5145	0.75452	0.219742	3.43366	0.000595494	0.0371566	1.42996
ENSMUSG00000097929	528.676	-0.528982	0.154047	-3.43389	0.000594975	0.0371566	1.42996
ENSMUSG00000026104	696.215	0.299904	0.0874182	3.43068	0.000602079	0.0374812	1.42619
ENSMUSG00000020866	1471.49	-0.645928	0.188557	-3.42563	0.000613368	0.0380963	1.41912
ENSMUSG00000103882	23.836	1.2408	0.363358	3.41481	0.000638275	0.0395526	1.40283
ENSMUSG00000029915	162.868	0.552909	0.162039	3.4122	0.000644408	0.0397009	1.4012
ENSMUSG00000063458	49.4243	0.663738	0.194515	3.41226	0.000644256	0.0397009	1.4012
ENSMUSG00000020573	335.833	0.455807	0.133702	3.40911	0.000651742	0.0400208	1.39771
ENSMUSG00000022221	9.89166	1.50901	0.442721	3.40848	0.000653249	0.0400226	1.3977
ENSMUSG00000024696	85.7462	0.545357	0.160131	3.40569	0.000659974	0.0403433	1.39423
ENSMUSG00000021390	821.383	0.735405	0.215992	3.40478	0.000662171	0.0403865	1.39376
ENSMUSG00000027514	18.4653	1.48088	0.437157	3.38752	0.000705284	0.0428231	1.36832
ENSMUSG00000034520	184.803	-0.53835	0.158902	-3.38795	0.000704171	0.0428231	1.36832
ENSMUSG00000031283	296.006	0.542364	0.160253	3.38442	0.000713296	0.0432126	1.36439
ENSMUSG00000071847	1176.95	-0.412249	0.122003	-3.37901	0.000727481	0.0438757	1.35778
ENSMUSG00000113186	54.9729	-0.721389	0.213485	-3.37912	0.000727192	0.0438757	1.35778
ENSMUSG00000048540	136.19	-0.673304	0.199344	-3.3776	0.000731205	0.0440023	1.35652
ENSMUSG00000034906	54.0643	-0.746894	0.221172	-3.37698	0.000732856	0.0440039	1.35651
ENSMUSG00000062545	41.3195	0.855835	0.25354	3.37555	0.000736685	0.0441359	1.35521
ENSMUSG00000113330	92.6513	0.696109	0.206262	3.37488	0.000738485	0.0441461	1.35511
ENSMUSG00000024737	73.8364	0.638909	0.189406	3.37323	0.000742929	0.0442165	1.35442
ENSMUSG00000053044	3.75334	3.11186	0.922483	3.37335	0.000742587	0.0442165	1.35442
ENSMUSG00000052133	511.624	-0.551904	0.163784	-3.36971	0.000752467	0.0446442	1.35024
ENSMUSG00000061186	317.818	-0.447424	0.132792	-3.36937	0.000753411	0.0446442	1.35024
ENSMUSG00000074578	950.428	0.452953	0.134759	3.3612	0.000776042	0.0458848	1.33833
ENSMUSG00000035697	304.244	0.463527	0.138223	3.35346	0.000798068	0.0469819	1.32807
ENSMUSG00000089773	11.5597	1.82241	0.543425	3.35356	0.000797802	0.0469819	1.32807
ENSMUSG00000038843	349.515	0.452485	0.135043	3.35068	0.000806145	0.0473544	1.32464
ENSMUSG00000092216	38.7297	-0.787685	0.235305	-3.34751	0.000815415	0.0477953	1.32061
ENSMUSG00000084234	15.4827	-1.13854	0.341319	-3.33572	0.000850787	0.0497609	1.30311
ENSMUSG00000060336	Zfp937
ENSMUSG00000063364	3300002I08Rik
ENSMUSG00000063393	Gm10130
ENSMUSG00000068130	Zfp442
ENSMUSG00000068134	Zfp120
ENSMUSG00000074731	Zfp345
ENSMUSG00000079008	Gm14124
ENSMUSG00000079009	Gm14139
ENSMUSG00000017667	Zfp334
ENSMUSG00000056824	Zfp663
ENSMUSG00000067480	Gm14403
ENSMUSG00000074519	Etohi1 (Zfp971)
ENSMUSG00000074521	Gm14327
ENSMUSG00000074527	Gm14296
ENSMUSG00000074529	C330013J21Rik (Zfp972)
ENSMUSG00000078861	Zfp931
ENSMUSG00000078862	Gm14326
ENSMUSG00000078863	Gm14325
ENSMUSG00000078864	Gm14322
ENSMUSG00000078865	Gm14406
ENSMUSG00000078866	Gm14420 (Zfp970)
ENSMUSG00000078867	Gm14418
ENSMUSG00000078868	Gm14412
ENSMUSG00000078870	Gm14410
ENSMUSG00000078872	Gm14401
ENSMUSG00000078875	Gm14419
ENSMUSG00000078876	Gm14408
ENSMUSG00000078877	Gm14295
ENSMUSG00000078878	Gm14305
ENSMUSG00000078879	Gm14306 (Zfp973)
ENSMUSG00000078880	Gm14308
ENSMUSG00000078882	Gm14431 (Zfp967)
ENSMUSG00000078883	Gm14430
ENSMUSG00000078884	Gm14436
ENSMUSG00000078885	Gm14432
ENSMUSG00000078886	Gm2026
ENSMUSG00000078887	Gm6710
ENSMUSG00000078888	Gm2007
ENSMUSG00000078889	Gm14288
ENSMUSG00000078890	Gm11007
ENSMUSG00000078891	Gm11008
ENSMUSG00000078893	Gm2004
ENSMUSG00000078894	2210418O10Rik
ENSMUSG00000078895	Gm11009
ENSMUSG00000078896	Gm8923 (Zfp965)
ENSMUSG00000078897	Gm4724
ENSMUSG00000078898	Gm4723 (Zfp968)
ENSMUSG00000078899	Gm4631
ENSMUSG00000078901	Gm14440
ENSMUSG00000078902	Gm14443
ENSMUSG00000078903	Gm14391
ENSMUSG00000078905	Gm14393
ENSMUSG00000078906	Gm14444
ENSMUSG00000089756	Gm8898 (Zfp966)
ENSMUSG00000089951	Gm14435 (Zfp968-ps)
ENSMUSG00000090093	Gm14399
ENSMUSG00000090221	Gm4245 (Zfp969)
ENSMUSG00000078503	Gm13225 (Zfp990)
ENSMUSG00000058186	Gm13242 (Zfp980)
ENSMUSG00000078500	Gm13235 (Zfp986)
ENSMUSG00000063245	Gm13248 (Zfp993)
ENSMUSG00000056300	Gm13247 (Zfp981)
ENSMUSG00000070605	Gm13251 (Zfp992)
ENSMUSG00000078499	Rex2
ENSMUSG00000066009	Gm13051 (Zfp987)
ENSMUSG00000066007	Zfp600
ENSMUSG00000086147	Gm13150 (Zfp989)
ENSMUSG00000067919	Gm13138
ENSMUSG00000067916	Gm13139 (Zfp991)
ENSMUSG00000078498	Gm13151 (Zfp988)
ENSMUSG00000078497	Gm13145 (Zfp978)
ENSMUSG00000078496	Gm13152 (Zfp982)
ENSMUSG00000065999	Gm13154 (Zfp985)
ENSMUSG00000066000	2610305D13Rik (Zfp979)
ENSMUSG00000062518	Zfp534
ENSMUSG00000078495	Gm13157 (Zfp984)
ENSMUSG00000059423	Zfp933
ENSMUSG00000023284	Zfp605
ENSMUSG00000066613	Zfp932
ENSMUSG00000072762	4930522L14Rik
ENSMUSG00000072763	5430403G16Rik
ENSMUSG00000090015	Gm15446
ENSMUSG00000029729	Zkscan1
ENSMUSG00000037007	Zfp113
ENSMUSG00000036898	Zfp157
ENSMUSG00000056014	A430033K04Rik
ENSMUSG00000058291	Zfp68
ENSMUSG00000029587	Zfp12
ENSMUSG00000046658	Zfp316
ENSMUSG00000061898	Rbak
ENSMUSG00000007812	Zfp655
ENSMUSG00000029627	Zkscan14
ENSMUSG00000055991	Zkscan5
ENSMUSG00000070420	Zfp498
ENSMUSG00000025821	Zfp282
ENSMUSG00000045466	Zfp956
ENSMUSG00000051499	Zfp786
ENSMUSG00000052763	Zfp212
ENSMUSG00000057691	Zfp746
ENSMUSG00000062519	Zfp398
ENSMUSG00000071477	Zfp777
ENSMUSG00000030145	Zfp248
ENSMUSG00000072623	Zfp9
ENSMUSG00000030443	Zfp583
ENSMUSG00000054893	Zfp667
ENSMUSG00000055150	Zfp78
ENSMUSG00000062861	Zfp28
ENSMUSG00000034538	Zfp418
ENSMUSG00000062116	Zfp954
ENSMUSG00000063535	Zfp773
ENSMUSG00000066838	Zfp772
ENSMUSG00000030386	Zfp606
ENSMUSG00000034071	Zfp551
ENSMUSG00000004500	Zfp324
ENSMUSG00000033961	Zfp446
ENSMUSG00000058638	Zfp110
ENSMUSG00000060397	Zfp128
ENSMUSG00000030486	Zfp108
ENSMUSG00000047603	Zfp235
ENSMUSG00000050605	Zfp61
ENSMUSG00000052675	Zfp112
ENSMUSG00000055305	Zfp93
ENSMUSG00000057101	Zfp180
ENSMUSG00000068962	Zfp114
ENSMUSG00000074282	Zfp94
ENSMUSG00000074283	Zfp109
ENSMUSG00000087598	Zfp111
ENSMUSG00000020420	Zfp607
ENSMUSG00000030604	Zfp626
ENSMUSG00000037640	Zfp60
ENSMUSG00000057093	C030039L03Rik
ENSMUSG00000063047	Zfp780b
ENSMUSG00000070709	1700049G17Rik
ENSMUSG00000078779	Zfp59
ENSMUSG00000011427	Zfp790
ENSMUSG00000046185	Zfp84
ENSMUSG00000047473	Zfp30
ENSMUSG00000050855	Zfp940
ENSMUSG00000053985	Zfp14
ENSMUSG00000058447	Zfp82
ENSMUSG00000059975	Zfp74
ENSMUSG00000062040	Zfp27
ENSMUSG00000074220	Zfp382
ENSMUSG00000074221	Zfp568
ENSMUSG00000078768	Zfp566
ENSMUSG00000056383	AI987944
ENSMUSG00000074165	Zfp788
ENSMUSG00000074166	AW146154
ENSMUSG00000090744	Gm6871
ENSMUSG00000091474	2610021A01Rik
ENSMUSG00000069727	Gm5595 (Zfp975)
ENSMUSG00000074158	9830147E19Rik
ENSMUSG00000091594	Gm17067
ENSMUSG00000092225	Gm2381
ENSMUSG00000092335	Gm7221 (ZFP977）
ENSMUSG00000092416	Zfp141
ENSMUSG00000012640	Zfp715
ENSMUSG00000064194	Zfp936
ENSMUSG00000074887	EU599041
ENSMUSG00000030469	Zfp719
ENSMUSG00000055102	Zfp819
ENSMUSG00000056592	Zfp658
ENSMUSG00000030823	9130019O22Rik
ENSMUSG00000045251	Zfp688
ENSMUSG00000045757	Zfp764
ENSMUSG00000048921	Zfp689
ENSMUSG00000054381	Zfp747
ENSMUSG00000078580	E430018J23Rik
ENSMUSG00000043090	Zfp866
ENSMUSG00000054648	Zfp869
ENSMUSG00000060427	Zfp868
ENSMUSG00000091764	Zfp964
ENSMUSG00000092260	Zfp963
ENSMUSG00000092544	Gm20422
ENSMUSG00000052446	Zfp961
ENSMUSG00000056019	Zfp709
ENSMUSG00000066880	Zfp617
ENSMUSG00000089857	Zfp882
ENSMUSG00000045519	Zfp560
ENSMUSG00000058192	Zfp846
ENSMUSG00000059475	Zfp426
ENSMUSG00000060510	Zfp266
ENSMUSG00000063108	Zfp26
ENSMUSG00000057982	Zfp809
ENSMUSG00000062794	Zfp599
ENSMUSG00000066829	Zfp810
ENSMUSG00000074472	Zfp872
ENSMUSG00000062540	Zfp781
ENSMUSG00000074860	Gm10778
ENSMUSG00000078436	Gm4767
ENSMUSG00000078437	Gm3055
ENSMUSG00000062931	Zfp938
ENSMUSG00000078435	AU041133
ENSMUSG00000020335	Zfp354b
ENSMUSG00000020364	Zfp354a
ENSMUSG00000044296	Zfp879
ENSMUSG00000044807	Zfp354c
ENSMUSG00000048728	Zfp454
ENSMUSG00000020491	2810021J22Rik
ENSMUSG00000037001	Zfp39
ENSMUSG00000068869	Gm12258
ENSMUSG00000020472	Zkscan17
ENSMUSG00000054519	Zfp867
ENSMUSG00000005267	Zfp287
ENSMUSG00000047342	Zfp286
ENSMUSG00000062632	Gm12588
ENSMUSG00000078564	Gm9631
ENSMUSG00000021327	Zkscan3
ENSMUSG00000063894	Zfp192
ENSMUSG00000055228	Zfp935
ENSMUSG00000072066	6720489N17Rik
ENSMUSG00000074865	Zfp934
ENSMUSG00000074867	Zfp808
ENSMUSG00000091183	Gm3604
ENSMUSG00000021510	A530054K11Rik
ENSMUSG00000030446	Zfp273
ENSMUSG00000048280	Zfp738
ENSMUSG00000051037	Zfp455
ENSMUSG00000052909	Gm9894
ENSMUSG00000055341	Zfp457
ENSMUSG00000055480	Zfp458
ENSMUSG00000055560	Zfp459
ENSMUSG00000056552	Zfp953
ENSMUSG00000057396	Zfp759
ENSMUSG00000057842	Zfp595
ENSMUSG00000058093	AA987161
ENSMUSG00000058246	Gm10037
ENSMUSG00000058331	Zfp85-rs1
ENSMUSG00000058883	Zfp708
ENSMUSG00000058900	Rsl1
ENSMUSG00000059839	Zfp874b
ENSMUSG00000069204	Zfp748
ENSMUSG00000069206	Zfp874a
ENSMUSG00000071281	Zfp71-rs1
ENSMUSG00000071285	Zfp87
ENSMUSG00000071291	Zfp58
ENSMUSG00000071295	Gm10323
ENSMUSG00000074824	Rslcan18
ENSMUSG00000074830	Zfp640
ENSMUSG00000078994	Zfp429
ENSMUSG00000078995	Zfp456
ENSMUSG00000090641	Zfp712
ENSMUSG00000090659	Zfp493
ENSMUSG00000069184	Zfp72
ENSMUSG00000069208	Zfp825
ENSMUSG00000022526	Zfp251
ENSMUSG00000033669	Zfp7
ENSMUSG00000054967	Zfp647
ENSMUSG00000022529	Zfp263
ENSMUSG00000039789	Zfp597
ENSMUSG00000067034	Zfp960
ENSMUSG00000072761	Gm6712
ENSMUSG00000073452	Zfp97
ENSMUSG00000023882	Zfp54
ENSMUSG00000023892	Zfp51
ENSMUSG00000033972	Zfp944
ENSMUSG00000035868	3110052M02Rik
ENSMUSG00000044501	Zfp758
ENSMUSG00000051341	Zfp52
ENSMUSG00000053347	Zfp943
ENSMUSG00000057409	Zfp53
ENSMUSG00000061544	Zfp229
ENSMUSG00000062743	Zfp677
ENSMUSG00000063383	Zfp947
ENSMUSG00000067928	Zfp760
ENSMUSG00000067931	Zfp948
ENSMUSG00000069743	Zfp820
ENSMUSG00000071266	Zfp946
ENSMUSG00000071267	Zfp942
ENSMUSG00000078546	2210404O09Rik
ENSMUSG00000062012	Zfp13
ENSMUSG00000071256	Zfp213
ENSMUSG00000003929	Zfp81
ENSMUSG00000008686	Zfp955a
ENSMUSG00000024298	Zfp871
ENSMUSG00000053390	Zfp952
ENSMUSG00000053600	Zfp472
ENSMUSG00000055202	Zfp811
ENSMUSG00000055240	Zfp101
ENSMUSG00000057254	Zfp870
ENSMUSG00000059000	Zfp799
ENSMUSG00000061532	Zfp955b
ENSMUSG00000067424	Zfp563
ENSMUSG00000067430	Zfp763
ENSMUSG00000003198	Zfp959
ENSMUSG00000057835	Zfp119a
ENSMUSG00000062101	Zfp119b
ENSMUSG00000023165	Ssxb2
ENSMUSG00000035371	Ssx9
ENSMUSG00000068218	Ssxb9
ENSMUSG00000068219	Ssxb10
ENSMUSG00000071816	Ssxb5
ENSMUSG00000079699	Gm6592
ENSMUSG00000079701	Ssxb3
ENSMUSG00000079703	Ssxb8
ENSMUSG00000079704	Gm14459
ENSMUSG00000079705	Ssxb1
ENSMUSG00000031079	Zfp300
ENSMUSG00000054737	Zfp182
ENSMUSG00000062814	Ssxa1
ENSMUSG00000040596	Pogk
ENSMUSG00000034800	Zfp661
ENSMUSG00000033883	D3Ertd254e
ENSMUSG00000028389	Zfp37
ENSMUSG00000038630	Zkscan16
ENSMUSG00000039634	Zfp189
ENSMUSG00000051351	Zfp46
ENSMUSG00000064141	Zfp69
ENSMUSG00000072774	Zfp951
ENSMUSG00000061969	Gm5581
ENSMUSG00000002266	Zim1
ENSMUSG00000030393	Zik1
ENSMUSG00000030757	Zkscan2
ENSMUSG00000048012	Zfp473
ENSMUSG00000060314	Zfp941
ENSMUSG00000068959	Zfp619
ENSMUSG00000031907	Zfp90
ENSMUSG00000044676	Zfp612
ENSMUSG00000055835	Zfp1
ENSMUSG00000058748	Zfp958
ENSMUSG00000059897	Zfp930
ENSMUSG00000074194	Zfp791
ENSMUSG00000091388	Gm17576
ENSMUSG00000025602	Zfp202
ENSMUSG00000032425	Zfp949
ENSMUSG00000043773	1700048O20Rik
ENSMUSG00000047036	Zfp445
ENSMUSG00000057551	Zfp317
ENSMUSG00000074500	Zfp558
ENSMUSG00000074829	2010315B03Rik
ENSMUSG00000050844	1700020N01Rik
ENSMUSG00000060301	2610008E11Rik
ENSMUSG00000018347	Zkscan6
ENSMUSG00000060630	Zfp735
ENSMUSG00000069476	Zfp616
ENSMUSG00000042063	Zfp386
ENSMUSG00000073158	9030624G23Rik
ENSMUSG00000073184	Gm10479
ENSMUSG00000073197	5730507C01Rik
ENSMUSG00000006720	Zfp184
ENSMUSG00000021514	Zfp369
ENSMUSG00000050954	Zfp169
ENSMUSG00000071302	Gm10324
ENSMUSG00000074832	2410141K09Rik (Zfp998)
ENSMUSG00000022987	Zfp641
ENSMUSG00000034429	Zfp707
ENSMUSG00000080717	B230307C23Rik
ENSMUSG00000002617	Zfp40
ENSMUSG00000051977	Prdm9
ENSMUSG00000059142	Zfp945
ENSMUSG00000067942	Zfp160
ENSMUSG00000092139	NCBIM37
ENSMUSG00000031374	Zfp92
ENSMUSG00000079697	Gm5751

## Sheet: CB YM
Gene	baseMean	log2FoldChange	lfcSE	stat	pvalue	padj	Volcano FDR
ENSMUSG00000036036	94.568	-1.38666	0.176944	-7.83673	4.62441e-15	9.80081e-12	11.0087
ENSMUSG00000072762	313.626	0.529927	0.100507	5.27256	1.34537e-07	4.75221e-05	4.3231
ENSMUSG00000072763	218.531	0.504525	0.127397	3.96026	7.48697e-05	0.00928424	2.03225
ENSMUSG00000091183	464.348	0.251647	0.0698132	3.60457	0.000312669	0.0285853	1.54386
ENSMUSG00000072762	4930522L14Rik
ENSMUSG00000072763	5430403G16Rik
ENSMUSG00000091183	Gm3604
ENSMUSG00000036036	Zfp57
ENSMUSG00000052276	62.599	2.33213	0.208344	11.1936	4.38051e-29	1.02123e-24	23.9909
ENSMUSG00000034459	268	1.53766	0.161932	9.49571	2.18715e-21	2.54946e-17	16.5936
ENSMUSG00000041828	582.797	1.02068	0.1138	8.96908	2.99009e-19	2.3236e-15	14.6338
ENSMUSG00000062488	416.716	1.32784	0.14883	8.92186	4.58539e-19	2.67248e-15	14.5731
ENSMUSG00000029826	825.485	0.873881	0.0995709	8.77647	1.68687e-18	7.86519e-15	14.1043
ENSMUSG00000063564	309.882	-0.781044	0.0920191	-8.48784	2.1051e-17	8.17938e-14	13.0873
ENSMUSG00000046879	380.028	1.06515	0.129509	8.22454	1.95947e-16	6.52587e-13	12.1854
ENSMUSG00000073418	995.644	1.31097	0.163733	8.00676	1.17769e-15	3.43192e-12	11.4645
ENSMUSG00000022176	155.907	-1.0354	0.130278	-7.9476	1.90158e-15	4.92573e-12	11.3075
ENSMUSG00000038642	1483.2	0.867662	0.110529	7.85011	4.15663e-15	9.69036e-12	11.0137
ENSMUSG00000074896	764.381	1.34167	0.172007	7.80007	6.18732e-15	1.20204e-11	10.9201
ENSMUSG00000031618	2908.47	0.476084	0.06152	7.73868	1.00453e-14	1.80143e-11	10.7444
ENSMUSG00000115529	52.4114	-1.82653	0.252044	-7.24686	4.26558e-13	7.1031e-10	9.14855
ENSMUSG00000023992	147.788	0.993649	0.137929	7.20406	5.84445e-13	9.08344e-10	9.04175
ENSMUSG00000025889	892.508	-0.845129	0.11925	-7.08702	1.37033e-12	1.99666e-09	8.6997
ENSMUSG00000026896	367.832	0.703534	0.102266	6.87944	6.00876e-12	8.24013e-09	8.08407
ENSMUSG00000029561	190.27	1.40753	0.206153	6.8276	8.63478e-12	1.11835e-08	7.95142
ENSMUSG00000062296	8890.42	0.454202	0.0671357	6.76544	1.32904e-11	1.63073e-08	7.78762
ENSMUSG00000040253	284.836	0.658659	0.0980737	6.71596	1.86836e-11	2.17785e-08	7.66197
ENSMUSG00000046805	433.94	0.749374	0.112245	6.67622	2.4518e-11	2.72184e-08	7.56514
ENSMUSG00000045932	417.319	0.862365	0.130986	6.58362	4.5914e-11	4.86542e-08	7.31288
ENSMUSG00000023224	545.07	0.570931	0.0885057	6.45078	1.11273e-10	1.12787e-07	6.94774
ENSMUSG00000022656	1499.13	-0.424443	0.0663419	-6.3978	1.57627e-10	1.53115e-07	6.81498
ENSMUSG00000057596	108.853	1.38874	0.217556	6.38334	1.73264e-10	1.61572e-07	6.79163
ENSMUSG00000073489	39.431	1.55973	0.247385	6.30487	2.88438e-10	2.53909e-07	6.59532
ENSMUSG00000079293	47.0433	1.72875	0.274323	6.30188	2.94066e-10	2.53909e-07	6.59532
ENSMUSG00000028364	1079.49	-0.918742	0.145952	-6.29481	3.0778e-10	2.5626e-07	6.59132
ENSMUSG00000005803	379.858	0.598109	0.0951924	6.28316	3.31756e-10	2.66697e-07	6.57398
ENSMUSG00000005397	762.686	-0.527306	0.0840713	-6.27213	3.56137e-10	2.76754e-07	6.55791
ENSMUSG00000022906	263.035	0.739582	0.11806	6.26446	3.74116e-10	2.81348e-07	6.55076
ENSMUSG00000046718	72.3883	1.10456	0.17738	6.22707	4.75225e-10	3.46216e-07	6.46065
ENSMUSG00000030107	75.6098	1.56457	0.256925	6.08959	1.13202e-09	7.99723e-07	6.09706
ENSMUSG00000026355	275.62	0.549585	0.0909973	6.03957	1.54522e-09	1.05952e-06	5.97489
ENSMUSG00000028755	84.5165	1.28849	0.216234	5.95877	2.54147e-09	1.69283e-06	5.77139
ENSMUSG00000056296	2135.43	0.471491	0.0792764	5.94742	2.72394e-09	1.76398e-06	5.75351
ENSMUSG00000078853	134.496	1.06224	0.181052	5.86704	4.43637e-09	2.79527e-06	5.55358
ENSMUSG00000040296	341.58	0.867249	0.148343	5.84622	5.02865e-09	3.08507e-06	5.51073
ENSMUSG00000054509	971.444	0.642555	0.110979	5.78988	7.04374e-09	4.21053e-06	5.37566
ENSMUSG00000051486	451.212	0.595446	0.103415	5.75785	8.51938e-09	4.96531e-06	5.30405
ENSMUSG00000113252	121.143	0.8263	0.14556	5.67668	1.37331e-08	7.80878e-06	5.10742
ENSMUSG00000070348	1167.32	-0.462932	0.0818258	-5.65754	1.5356e-08	8.52369e-06	5.06937
ENSMUSG00000049107	154.225	-1.02522	0.181464	-5.64969	1.60739e-08	8.71468e-06	5.05975
ENSMUSG00000025498	94.2625	1.34693	0.238678	5.6433	1.66826e-08	8.83911e-06	5.05359
ENSMUSG00000031849	94.6878	1.21311	0.215146	5.63854	1.715e-08	8.88484e-06	5.05135
ENSMUSG00000028150	1086.25	0.520914	0.0939464	5.5448	2.94293e-08	1.49149e-05	4.82638
ENSMUSG00000033880	387.682	1.137	0.205522	5.53228	3.16097e-08	1.56791e-05	4.80468
ENSMUSG00000024331	29.248	-2.01895	0.365603	-5.52224	3.34696e-08	1.60557e-05	4.79437
ENSMUSG00000097929	823.167	-0.5788	0.10484	-5.5208	3.37465e-08	1.60557e-05	4.79437
ENSMUSG00000016496	73.7572	0.947002	0.172042	5.50448	3.70252e-08	1.69249e-05	4.77147
ENSMUSG00000024339	297.75	0.719236	0.130644	5.50529	3.68553e-08	1.69249e-05	4.77147
ENSMUSG00000019820	10588.3	0.260571	0.0474496	5.49154	3.98448e-08	1.72701e-05	4.76271
ENSMUSG00000064215	512.015	0.966508	0.176022	5.49084	4.00028e-08	1.72701e-05	4.76271
ENSMUSG00000092083	1270.02	-0.46116	0.0839002	-5.49653	3.8734e-08	1.72701e-05	4.76271
ENSMUSG00000044042	1844.48	0.363774	0.066329	5.48438	4.14911e-08	1.7587e-05	4.75481
ENSMUSG00000060802	2730.24	0.525143	0.0966603	5.43287	5.54542e-08	2.26808e-05	4.64434
ENSMUSG00000070527	109.056	-1.08439	0.199566	-5.43373	5.51872e-08	2.26808e-05	4.64434
ENSMUSG00000060519	436.238	0.553614	0.102542	5.39889	6.70546e-08	2.69525e-05	4.5694
ENSMUSG00000020467	620.832	0.481171	0.08938	5.38343	7.30802e-08	2.88766e-05	4.53945
ENSMUSG00000089679	141.339	1.26835	0.236583	5.36113	8.27031e-08	3.21343e-05	4.49303
ENSMUSG00000103800	186.469	0.768852	0.143638	5.35272	8.66415e-08	3.31127e-05	4.48001
ENSMUSG00000070327	2218.63	0.903841	0.169622	5.32855	9.89989e-08	3.72252e-05	4.42916
ENSMUSG00000001506	301.968	-1.61989	0.306044	-5.29298	1.20337e-07	4.45305e-05	4.35134
ENSMUSG00000000290	108.454	0.80587	0.152596	5.28106	1.28441e-07	4.60668e-05	4.33661
ENSMUSG00000104713	102.873	1.41396	0.267671	5.28244	1.27472e-07	4.60668e-05	4.33661
ENSMUSG00000073590	706.995	0.526813	0.100295	5.25266	1.49919e-07	5.21651e-05	4.28262
ENSMUSG00000041062	37.8104	1.37501	0.261979	5.24856	1.53296e-07	5.25556e-05	4.27938
ENSMUSG00000105096	29.6188	2.27682	0.436222	5.21941	1.79495e-07	6.06459e-05	4.2172
ENSMUSG00000103677	776.789	0.463417	0.0889101	5.2122	1.86617e-07	6.21513e-05	4.20655
ENSMUSG00000029605	34.0022	1.77237	0.340323	5.20791	1.90975e-07	6.27069e-05	4.20268
ENSMUSG00000006522	3355.58	0.431345	0.0832013	5.18435	2.1677e-07	6.9679e-05	4.1569
ENSMUSG00000028268	265.485	0.800307	0.154406	5.18314	2.18186e-07	6.9679e-05	4.1569
ENSMUSG00000021665	1990.87	0.428713	0.0830275	5.16351	2.42359e-07	7.6353e-05	4.11717
ENSMUSG00000025888	90.3224	0.8932	0.173472	5.14897	2.61921e-07	8.14154e-05	4.08929
ENSMUSG00000035208	63.8967	1.19434	0.232228	5.14299	2.70407e-07	8.29472e-05	4.0812
ENSMUSG00000075020	413.026	-1.00227	0.195223	-5.13396	2.83713e-07	8.58988e-05	4.06601
ENSMUSG00000078945	60.2303	0.983727	0.19255	5.10894	3.23967e-07	9.68287e-05	4.014
ENSMUSG00000036896	557.292	0.616648	0.121329	5.08246	3.72581e-07	0.000109305	3.96136
ENSMUSG00000052336	573.535	0.488468	0.0961327	5.08119	3.75086e-07	0.000109305	3.96136
ENSMUSG00000000560	1064.1	-0.395084	0.0778901	-5.07232	3.92986e-07	0.000113107	3.94651
ENSMUSG00000002108	313.513	0.456456	0.0902198	5.05937	4.20644e-07	0.000119591	3.9223
ENSMUSG00000020143	144.253	0.698275	0.138459	5.04319	4.57842e-07	0.000128599	3.89076
ENSMUSG00000042834	20033.4	-0.387555	0.0774208	-5.00582	5.56234e-07	0.000154375	3.81142
ENSMUSG00000046764	21.3381	2.40848	0.482424	4.99245	5.96173e-07	0.000162079	3.79027
ENSMUSG00000079017	43.161	1.69076	0.338701	4.99189	5.97899e-07	0.000162079	3.79027
ENSMUSG00000096929	7576.55	0.441429	0.0885996	4.9823	6.28336e-07	0.000168372	3.77373
ENSMUSG00000028360	318.325	0.638203	0.128364	4.97181	6.63311e-07	0.000175725	3.75517
ENSMUSG00000036565	981.367	-0.377978	0.0761747	-4.96199	6.97757e-07	0.000182773	3.73809
ENSMUSG00000066258	139.914	0.721463	0.145619	4.95446	7.25329e-07	0.000187884	3.72611
ENSMUSG00000000275	202.572	0.592872	0.119937	4.94319	7.68531e-07	0.000196887	3.70578
ENSMUSG00000027489	467.157	-0.618761	0.125412	-4.93383	8.0634e-07	0.000204328	3.68967
ENSMUSG00000039989	940.828	-0.362679	0.0737211	-4.9196	8.67194e-07	0.000217386	3.66277
ENSMUSG00000061232	690.272	0.591138	0.120252	4.91583	8.84079e-07	0.000218866	3.65982
ENSMUSG00000104346	1296	0.499737	0.101694	4.91411	8.91876e-07	0.000218866	3.65982
ENSMUSG00000030921	170.637	0.90997	0.186485	4.87958	1.0631e-06	0.000258168	3.5881
ENSMUSG00000036887	771.573	0.693065	0.142169	4.87495	1.08838e-06	0.000261581	3.58239
ENSMUSG00000059970	761.532	0.508657	0.104511	4.86704	1.13284e-06	0.00026949	3.56946
ENSMUSG00000003282	587.587	0.3216	0.0662648	4.85326	1.21447e-06	0.000285989	3.54365
ENSMUSG00000108168	147.982	-0.846552	0.17562	-4.82035	1.43308e-06	0.000334093	3.47613
ENSMUSG00000052229	551.744	-0.865671	0.179748	-4.81603	1.46444e-06	0.000338025	3.47105
ENSMUSG00000042532	2556.28	-0.30822	0.0640798	-4.80994	1.50978e-06	0.000345074	3.46209
ENSMUSG00000032415	496.394	0.470087	0.0978312	4.80508	1.54686e-06	0.000350117	3.45579
ENSMUSG00000063972	643.327	0.627662	0.13084	4.79718	1.60915e-06	0.000360712	3.44284
ENSMUSG00000044043	1406.64	0.413969	0.0864137	4.79054	1.66332e-06	0.000369305	3.43261
ENSMUSG00000026090	1097.23	0.410839	0.0862921	4.76103	1.92608e-06	0.000423611	3.37303
ENSMUSG00000027009	193.684	-0.553958	0.116752	-4.74476	2.08752e-06	0.000454826	3.34215
ENSMUSG00000026315	91.5088	-0.961011	0.202761	-4.73962	2.14124e-06	0.00046221	3.33516
ENSMUSG00000030789	14.158	2.19971	0.46482	4.73239	2.21887e-06	0.000472574	3.32553
ENSMUSG00000032436	169.469	0.858381	0.181422	4.7314	2.22979e-06	0.000472574	3.32553
ENSMUSG00000108825	406.339	0.452406	0.0957303	4.72584	2.29167e-06	0.000481313	3.31757
ENSMUSG00000031504	19.4115	1.83761	0.389254	4.72085	2.34857e-06	0.000488859	3.31082
ENSMUSG00000030579	192.68	0.698236	0.148353	4.7066	2.51888e-06	0.000519669	3.28427
ENSMUSG00000039903	133.537	0.644529	0.137363	4.69214	2.70359e-06	0.000552884	3.25737
ENSMUSG00000031170	73.6238	-0.98048	0.209406	-4.68219	2.83829e-06	0.000575382	3.24004
ENSMUSG00000031636	50.4149	-1.03621	0.221424	-4.67976	2.87215e-06	0.000577228	3.23865
ENSMUSG00000051242	502.977	0.450506	0.0966715	4.66017	3.15953e-06	0.000629557	3.20096
ENSMUSG00000025887	262.933	0.667654	0.144087	4.6337	3.59192e-06	0.000709649	3.14896
ENSMUSG00000047735	382.056	0.517982	0.112289	4.61295	3.9699e-06	0.000777733	3.10917
ENSMUSG00000074151	66.0902	1.13157	0.246468	4.59113	4.40855e-06	0.000856472	3.06729
ENSMUSG00000058715	98.3318	0.626636	0.136576	4.5882	4.47082e-06	0.00086139	3.0648
ENSMUSG00000004707	21.5584	1.44446	0.315252	4.58191	4.60752e-06	0.000880451	3.05529
ENSMUSG00000032714	499.885	0.459498	0.101093	4.54532	5.48509e-06	0.00103963	2.98312
ENSMUSG00000049502	415.628	0.426855	0.0940215	4.53997	5.62617e-06	0.00105777	2.97561
ENSMUSG00000034422	299.749	0.585277	0.129142	4.53205	5.84136e-06	0.00108944	2.9628
ENSMUSG00000056144	145.128	0.939998	0.207558	4.52883	5.93104e-06	0.00109738	2.95964
ENSMUSG00000051029	216.907	0.583853	0.129287	4.51597	6.30291e-06	0.00115701	2.93666
ENSMUSG00000068220	346.22	0.519538	0.115223	4.50896	6.51458e-06	0.00118652	2.92573
ENSMUSG00000010461	71.6781	1.05955	0.236146	4.48684	7.22882e-06	0.0013064	2.88392
ENSMUSG00000024338	89.1055	0.968137	0.216181	4.47835	7.52207e-06	0.00134192	2.87227
ENSMUSG00000073902	51.1762	0.901084	0.201232	4.47783	7.54051e-06	0.00134192	2.87227
ENSMUSG00000038507	691.428	0.587568	0.131562	4.46609	7.96618e-06	0.00140694	2.85173
ENSMUSG00000037428	154.88	-0.876548	0.198082	-4.42519	9.6359e-06	0.00168903	2.77236
ENSMUSG00000019232	4461.2	0.592596	0.135123	4.38562	1.15658e-05	0.0020122	2.69633
ENSMUSG00000023905	401.126	-0.677095	0.154596	-4.37976	1.18812e-05	0.00203666	2.69108
ENSMUSG00000027188	169.302	0.540064	0.123296	4.38021	1.18564e-05	0.00203666	2.69108
ENSMUSG00000036908	218.699	0.535802	0.122842	4.36171	1.29049e-05	0.002196	2.65837
ENSMUSG00000056328	9.24693	-4.40757	1.01201	-4.35526	1.32909e-05	0.0022453	2.64873
ENSMUSG00000079434	36.4368	-1.09562	0.251809	-4.351	1.3552e-05	0.00227293	2.64341
ENSMUSG00000026043	294.641	-0.607776	0.13998	-4.34188	1.41268e-05	0.00235242	2.62849
ENSMUSG00000110649	92.3817	0.666196	0.153506	4.33986	1.42574e-05	0.00235733	2.62758
ENSMUSG00000037921	97.028	0.891716	0.205552	4.33816	1.43682e-05	0.00235891	2.62729
ENSMUSG00000004110	16018.8	-0.407521	0.0943051	-4.3213	1.5511e-05	0.00252873	2.5971
ENSMUSG00000117465	47.2255	-1.19902	0.27767	-4.31814	1.5735e-05	0.00254742	2.5939
ENSMUSG00000044674	1883.63	0.245668	0.0569823	4.3113	1.62299e-05	0.00260943	2.58345
ENSMUSG00000020641	107.526	0.752421	0.175427	4.28907	1.79423e-05	0.002865	2.54288
ENSMUSG00000007877	45.6571	1.1155	0.260796	4.27728	1.89194e-05	0.00300047	2.52281
ENSMUSG00000024579	600.934	-0.286109	0.0670669	-4.26602	1.98993e-05	0.00313454	2.50383
ENSMUSG00000063286	234.455	0.445036	0.104457	4.26046	2.04004e-05	0.0031919	2.49595
ENSMUSG00000024079	518.576	0.573759	0.135212	4.2434	2.20154e-05	0.0034204	2.46592
ENSMUSG00000115263	319.887	0.387394	0.0913235	4.242	2.21542e-05	0.0034204	2.46592
ENSMUSG00000042644	1357.25	0.775723	0.183042	4.23794	2.25579e-05	0.00345308	2.46179
ENSMUSG00000064294	77.373	0.89261	0.210675	4.23691	2.26621e-05	0.00345308	2.46179
ENSMUSG00000031502	878.404	-0.421226	0.0995197	-4.23259	2.31014e-05	0.00349717	2.45628
ENSMUSG00000050556	2265.02	0.35986	0.0857935	4.1945	2.7348e-05	0.00411331	2.38581
ENSMUSG00000098973	679.456	-1.32992	0.317554	-4.18802	2.81402e-05	0.00420533	2.3762
ENSMUSG00000039457	124.073	0.790376	0.189376	4.17357	2.9986e-05	0.00444969	2.35167
ENSMUSG00000073565	501.534	-0.520947	0.124859	-4.17228	3.01571e-05	0.00444969	2.35167
ENSMUSG00000035606	104.201	-0.743087	0.178512	-4.16267	3.14548e-05	0.00461199	2.33611
ENSMUSG00000043943	107.392	0.617538	0.148879	4.14793	3.35493e-05	0.00488835	2.31084
ENSMUSG00000035929	92.1871	0.841615	0.203557	4.13455	3.55655e-05	0.00514993	2.2882
ENSMUSG00000079084	3480.89	0.203465	0.0492534	4.13099	3.6121e-05	0.00519808	2.28416
ENSMUSG00000034460	286.257	0.690277	0.167366	4.12437	3.71757e-05	0.00531704	2.27433
ENSMUSG00000039997	141.113	0.655409	0.159228	4.11616	3.85232e-05	0.00544955	2.26364
ENSMUSG00000103037	788.583	0.42146	0.102398	4.11588	3.85697e-05	0.00544955	2.26364
ENSMUSG00000029661	948.189	-0.465586	0.113386	-4.10619	4.02232e-05	0.00564894	2.24803
ENSMUSG00000064380	937.008	0.429399	0.104705	4.10106	4.1127e-05	0.00574128	2.24099
ENSMUSG00000103088	1870.15	0.36498	0.0891003	4.09628	4.19848e-05	0.00582614	2.23462
ENSMUSG00000052397	1067.76	0.631515	0.15434	4.09173	4.28172e-05	0.00590649	2.22867
ENSMUSG00000047117	21.1167	1.32979	0.325189	4.08928	4.32721e-05	0.00593414	2.22664
ENSMUSG00000059854	608.674	0.474347	0.116065	4.08692	4.37136e-05	0.00595962	2.22478
ENSMUSG00000036905	558.732	0.486131	0.119161	4.0796	4.51129e-05	0.00611464	2.21363
ENSMUSG00000026946	225.444	0.394252	0.0969392	4.06701	4.76212e-05	0.0064173	2.19265
ENSMUSG00000025912	964.911	0.343	0.0845991	4.05442	5.0259e-05	0.00673384	2.17174
ENSMUSG00000041046	165.436	-0.515064	0.127211	-4.0489	5.14591e-05	0.00681673	2.16642
ENSMUSG00000064267	45.0675	0.91497	0.225981	4.04888	5.14625e-05	0.00681673	2.16642
ENSMUSG00000000386	17.607	1.40669	0.348896	4.03184	5.53427e-05	0.00724833	2.13976
ENSMUSG00000030674	46.4898	0.838992	0.208037	4.0329	5.50922e-05	0.00724833	2.13976
ENSMUSG00000052974	14.0432	-1.65342	0.411892	-4.01422	5.96434e-05	0.0077505	2.11067
ENSMUSG00000058070	3227.58	-0.234723	0.0584844	-4.01343	5.98417e-05	0.0077505	2.11067
ENSMUSG00000011256	576.222	-0.449903	0.112301	-4.00622	6.16975e-05	0.00794671	2.09981
ENSMUSG00000108218	34.119	1.14436	0.285796	4.00411	6.22502e-05	0.00797385	2.09833
ENSMUSG00000028145	1213.96	-0.33623	0.0840649	-3.99965	6.3436e-05	0.00808134	2.09252
ENSMUSG00000006611	255.888	0.511669	0.128436	3.98386	6.78057e-05	0.00859105	2.06595
ENSMUSG00000018819	82.2348	0.698164	0.175579	3.97636	6.99779e-05	0.00881835	2.05461
ENSMUSG00000047867	113.352	-0.604318	0.152232	-3.96971	7.19615e-05	0.00901956	2.04481
ENSMUSG00000071341	22.1762	-1.18728	0.299271	-3.96724	7.27101e-05	0.00906465	2.04265
ENSMUSG00000026395	172.738	0.513927	0.129824	3.95863	7.53799e-05	0.00929805	2.03161
ENSMUSG00000017418	2424.57	-0.209178	0.052913	-3.95325	7.70981e-05	0.00936139	2.02866
ENSMUSG00000019055	919.939	-0.363776	0.0919813	-3.95488	7.65717e-05	0.00936139	2.02866
ENSMUSG00000109517	191.779	-0.626209	0.158356	-3.95443	7.67163e-05	0.00936139	2.02866
ENSMUSG00000004730	131.883	0.638301	0.161662	3.94837	7.86842e-05	0.00950448	2.02207
ENSMUSG00000022895	2626.36	-0.267068	0.0676956	-3.94513	7.97568e-05	0.00958439	2.01844
ENSMUSG00000023232	505.468	-0.395343	0.100361	-3.93921	8.17488e-05	0.00977338	2.00996
ENSMUSG00000038147	94.6065	0.672548	0.171074	3.93133	8.44772e-05	0.010048	1.99792
ENSMUSG00000022831	75.4832	0.642394	0.16357	3.92734	8.58892e-05	0.0101132	1.99511
ENSMUSG00000035202	1028.49	-0.738173	0.187958	-3.92733	8.58927e-05	0.0101132	1.99511
ENSMUSG00000059149	1379.44	-0.302992	0.0773912	-3.91507	9.03764e-05	0.0105877	1.9752
ENSMUSG00000006411	570.423	0.352667	0.0902387	3.90815	9.30042e-05	0.010774	1.96762
ENSMUSG00000073411	3059.13	0.273908	0.0701027	3.90725	9.33537e-05	0.010774	1.96762
ENSMUSG00000119584	4207.8	-1.50757	0.385763	-3.90802	9.30574e-05	0.010774	1.96762
ENSMUSG00000044921	196.904	0.567042	0.146386	3.87362	0.000107232	0.0123148	1.90957
ENSMUSG00000026822	66.0464	-3.84898	0.999421	-3.85121	0.000117538	0.0134321	1.87186
ENSMUSG00000056031	42.9338	0.826376	0.214876	3.84582	0.000120148	0.0136635	1.86444
ENSMUSG00000036814	646.976	0.464815	0.120945	3.84319	0.000121448	0.0137442	1.86188
ENSMUSG00000026285	4.94813	2.96348	0.771621	3.84059	0.000122737	0.0137887	1.86048
ENSMUSG00000069793	25.914	1.23454	0.321494	3.84002	0.000123024	0.0137887	1.86048
ENSMUSG00000069516	294.525	0.634059	0.165304	3.83572	0.000125196	0.0139651	1.85496
ENSMUSG00000025578	426.067	-0.409231	0.107416	-3.80977	0.000139095	0.0154416	1.81131
ENSMUSG00000033355	79.3197	0.888955	0.233766	3.80275	0.000143098	0.0158106	1.80105
ENSMUSG00000063434	1101.57	0.279228	0.0735137	3.79831	0.000145685	0.0159453	1.79737
ENSMUSG00000103770	305.342	0.493781	0.129975	3.79904	0.000145256	0.0159453	1.79737
ENSMUSG00000059456	271.232	0.842759	0.221968	3.79676	0.000146597	0.0159702	1.79669
ENSMUSG00000032232	3594.19	-0.2107	0.0555539	-3.79272	0.000149008	0.0160876	1.79351
ENSMUSG00000045502	4.60468	3.44549	0.908865	3.79098	0.000150054	0.0160876	1.79351
ENSMUSG00000049097	873.099	-0.271751	0.0716572	-3.79237	0.000149216	0.0160876	1.79351
ENSMUSG00000077167	908.868	0.511595	0.134973	3.79035	0.000150436	0.0160876	1.79351
ENSMUSG00000025533	364.086	0.343162	0.0908938	3.77542	0.000159741	0.0168797	1.77263
ENSMUSG00000039851	92.3921	0.630182	0.166936	3.77499	0.000160015	0.0168797	1.77263
ENSMUSG00000040310	87.8618	0.602252	0.159451	3.77703	0.000158707	0.0168797	1.77263
ENSMUSG00000073555	25.6493	1.14308	0.30362	3.76485	0.000166652	0.0175007	1.75694
ENSMUSG00000104157	116.276	0.503701	0.133834	3.76362	0.000167469	0.0175076	1.75677
ENSMUSG00000056999	6650.99	-0.509055	0.135879	-3.74637	0.000179409	0.0186721	1.72881
ENSMUSG00000056737	83.0234	0.635598	0.169993	3.73896	0.000184782	0.0191459	1.71792
ENSMUSG00000022488	215.773	0.527623	0.141292	3.73427	0.000188264	0.0194203	1.71174
ENSMUSG00000016206	48.4243	0.815388	0.21903	3.72272	0.000197089	0.0198906	1.70135
ENSMUSG00000029298	283.354	0.426062	0.114381	3.72495	0.000195357	0.0198906	1.70135
ENSMUSG00000030319	352.058	0.421016	0.112975	3.72664	0.000194053	0.0198906	1.70135
ENSMUSG00000050335	60.0297	0.806397	0.216611	3.72279	0.000197034	0.0198906	1.70135
ENSMUSG00000085379	184.463	-0.393586	0.105674	-3.72452	0.000195685	0.0198906	1.70135
ENSMUSG00000046719	350.41	0.459312	0.123427	3.72133	0.000198176	0.0199141	1.70084
ENSMUSG00000046186	84.89	0.831203	0.223858	3.71309	0.000204743	0.0204858	1.68855
ENSMUSG00000028581	206.044	0.414802	0.112177	3.69774	0.000217528	0.021672	1.6641
ENSMUSG00000042246	1040.07	-0.245162	0.0665426	-3.68429	0.000229342	0.0227517	1.64299
ENSMUSG00000052776	35.633	0.913484	0.248256	3.6796	0.000233598	0.0230757	1.63684
ENSMUSG00000040170	118.317	0.882231	0.240088	3.67462	0.000238202	0.0234313	1.6302
ENSMUSG00000070637	57.7605	-0.670645	0.182566	-3.67344	0.000239304	0.0234407	1.63003
ENSMUSG00000036353	488.86	0.329556	0.0898989	3.66585	0.000246519	0.0240464	1.61895
ENSMUSG00000029798	144.388	0.60304	0.164781	3.65964	0.000252571	0.0245341	1.61023
ENSMUSG00000001281	161.782	0.485508	0.132749	3.65733	0.000254856	0.0246534	1.60812
ENSMUSG00000054675	214.347	0.516592	0.141606	3.6481	0.000264186	0.0254502	1.59431
ENSMUSG00000057003	9.60934	-3.53494	0.970264	-3.64327	0.000269191	0.0258258	1.58795
ENSMUSG00000046152	799.435	0.299981	0.0823866	3.64114	0.000271433	0.0259341	1.58613
ENSMUSG00000000682	40.647	1.18389	0.325414	3.63809	0.000274668	0.0261361	1.58276
ENSMUSG00000025150	22.8974	-1.16687	0.320853	-3.63676	0.000276091	0.0261647	1.58228
ENSMUSG00000041120	806.056	0.408852	0.112464	3.63542	0.00027753	0.0261946	1.58179
ENSMUSG00000015134	67.7922	0.737133	0.202897	3.63304	0.000280097	0.0263303	1.57954
ENSMUSG00000024308	804.102	0.357238	0.0983715	3.63152	0.000281752	0.0263794	1.57873
ENSMUSG00000038844	1887.25	0.224929	0.0620188	3.62679	0.000286967	0.0267603	1.57251
ENSMUSG00000040675	1221.2	0.260432	0.0718945	3.62242	0.000291862	0.0271083	1.5669
ENSMUSG00000004266	86.84	0.551449	0.152312	3.62052	0.000294012	0.0271996	1.56544
ENSMUSG00000051236	401.908	0.274225	0.0759415	3.611	0.000305021	0.0279959	1.55291
ENSMUSG00000067212	240.162	0.522919	0.144778	3.61188	0.00030399	0.0279959	1.55291
ENSMUSG00000056692	5942.69	-0.13187	0.0365978	-3.60323	0.000314287	0.028621	1.54332
ENSMUSG00000018899	150.647	0.468563	0.130158	3.59995	0.000318279	0.0287366	1.54156
ENSMUSG00000020990	916.396	0.26965	0.0749382	3.5983	0.000320309	0.0287366	1.54156
ENSMUSG00000030798	25.1512	0.975585	0.27121	3.59715	0.00032172	0.0287366	1.54156
ENSMUSG00000033658	1918.68	-0.225933	0.0628075	-3.59723	0.000321629	0.0287366	1.54156
ENSMUSG00000041180	954.097	-0.29892	0.0830316	-3.60008	0.000318122	0.0287366	1.54156
ENSMUSG00000015852	140.828	-0.573247	0.159647	-3.59071	0.000329775	0.0293118	1.53296
ENSMUSG00000049872	67.6756	0.635823	0.177109	3.59	0.000330675	0.0293118	1.53296
ENSMUSG00000079547	28.2562	1.07656	0.300103	3.58729	0.000334138	0.0295067	1.53008
ENSMUSG00000016256	977.45	0.353104	0.0984605	3.58625	0.000335464	0.029512	1.53
ENSMUSG00000086587	24.9868	1.00581	0.280574	3.58482	0.000337314	0.0295631	1.52925
ENSMUSG00000039959	3414.19	-0.248981	0.0696356	-3.57548	0.000349588	0.0305241	1.51536
ENSMUSG00000054640	18084.6	-0.202214	0.0565994	-3.57272	0.000353291	0.0307324	1.5124
ENSMUSG00000021775	8465.82	0.184833	0.0517593	3.57101	0.000355608	0.0308189	1.51118
ENSMUSG00000025104	7142.28	0.182927	0.0513488	3.56244	0.000367422	0.0313762	1.5034
ENSMUSG00000026956	381.482	0.308756	0.0866185	3.56455	0.000364485	0.0313762	1.5034
ENSMUSG00000095990	138.121	0.553879	0.155437	3.56337	0.000366122	0.0313762	1.5034
ENSMUSG00000097330	125.703	-0.53672	0.150624	-3.56332	0.000366197	0.0313762	1.5034
ENSMUSG00000018381	36.1891	0.817666	0.229738	3.55913	0.000372086	0.0316586	1.49951
ENSMUSG00000044518	7.30967	-2.59093	0.728466	-3.5567	0.000375548	0.031837	1.49707
ENSMUSG00000033207	298.318	0.311146	0.087777	3.54473	0.000393018	0.0331193	1.47992
ENSMUSG00000034115	10.2455	-1.80053	0.507992	-3.54439	0.000393516	0.0331193	1.47992
ENSMUSG00000027227	624.541	0.324759	0.0918439	3.53599	0.000406253	0.0340683	1.46765
ENSMUSG00000044499	252.219	-0.409944	0.115996	-3.53412	0.000409138	0.0341872	1.46614
ENSMUSG00000057337	103.674	-0.512358	0.145074	-3.5317	0.000412894	0.0343779	1.46372
ENSMUSG00000104318	238.124	0.41827	0.118517	3.52918	0.000416846	0.0345834	1.46113
ENSMUSG00000002325	525.902	0.509922	0.144682	3.52443	0.000424394	0.0350848	1.45488
ENSMUSG00000069893	32.2493	0.854752	0.242654	3.52252	0.000427467	0.0352139	1.45329
ENSMUSG00000002980	429.379	0.366493	0.104112	3.5202	0.000431228	0.0353987	1.45101
ENSMUSG00000048304	617.393	-0.503337	0.14331	-3.51222	0.000444381	0.0363503	1.43949
ENSMUSG00000001768	870.223	0.278224	0.0793859	3.5047	0.000457114	0.0372612	1.42874
ENSMUSG00000039234	335.336	0.299405	0.0857209	3.49279	0.000478002	0.0388281	1.41085
ENSMUSG00000015340	48.6534	0.695134	0.199147	3.49055	0.000482033	0.0388845	1.41022
ENSMUSG00000086324	25.2247	-1.57552	0.451366	-3.49056	0.000482001	0.0388845	1.41022
ENSMUSG00000034000	155.306	-0.59378	0.170551	-3.48154	0.000498535	0.0400771	1.3971
ENSMUSG00000033579	543.889	-0.405076	0.116407	-3.47982	0.000501752	0.040197	1.39581
ENSMUSG00000030577	9.25171	1.77335	0.510909	3.47098	0.000518564	0.0414016	1.38298
ENSMUSG00000040229	157.182	0.5597	0.161387	3.46807	0.00052422	0.0417103	1.37976
ENSMUSG00000020814	201.863	0.525662	0.151776	3.46341	0.000533371	0.0421004	1.37571
ENSMUSG00000022817	2761.14	0.214521	0.0619187	3.46457	0.000531088	0.0421004	1.37571
ENSMUSG00000113701	136.25	0.45523	0.131462	3.46282	0.00053454	0.0421004	1.37571
ENSMUSG00000086290	346.298	0.285523	0.0826472	3.45472	0.000550864	0.04324	1.36411
ENSMUSG00000048424	438.849	0.396788	0.114885	3.45379	0.000552769	0.043244	1.36407
ENSMUSG00000052160	113.297	0.562901	0.163198	3.4492	0.000562258	0.0438392	1.35814
ENSMUSG00000114479	25.2289	1.12628	0.32695	3.4448	0.000571479	0.0444096	1.35252
ENSMUSG00000020937	308.312	0.394104	0.114451	3.44345	0.000574351	0.0444845	1.35179
ENSMUSG00000036306	482.301	-0.420068	0.122184	-3.43799	0.00058605	0.0452404	1.34447
ENSMUSG00000016262	243.571	-0.448105	0.130481	-3.43425	0.000594192	0.0452776	1.34412
ENSMUSG00000037086	23.4179	2.06426	0.601087	3.4342	0.000594301	0.0452776	1.34412
ENSMUSG00000045318	188.499	-0.376622	0.109635	-3.43522	0.00059207	0.0452776	1.34412
ENSMUSG00000078607	146.083	0.43911	0.127831	3.43508	0.000592376	0.0452776	1.34412
ENSMUSG00000024642	1797.67	0.228961	0.0669648	3.41913	0.000628221	0.0477059	1.32143
ENSMUSG00000059887	5.85476	3.22044	0.942736	3.41606	0.000635348	0.0480905	1.31794
ENSMUSG00000022490	216.676	-0.592312	0.173833	-3.40737	0.000655931	0.0491922	1.3081
ENSMUSG00000036362	178.737	0.405699	0.119016	3.40878	0.000652543	0.0491922	1.3081
ENSMUSG00000104240	198.518	0.522569	0.15337	3.40724	0.000656234	0.0491922	1.3081
ENSMUSG00000029455	1681.62	0.300656	0.0883636	3.40248	0.00066777	0.0498965	1.30193
ENSMUSG00000060336	Zfp937
ENSMUSG00000063364	3300002I08Rik
ENSMUSG00000063393	Gm10130
ENSMUSG00000068130	Zfp442
ENSMUSG00000068134	Zfp120
ENSMUSG00000074731	Zfp345
ENSMUSG00000079008	Gm14124
ENSMUSG00000079009	Gm14139
ENSMUSG00000017667	Zfp334
ENSMUSG00000056824	Zfp663
ENSMUSG00000067480	Gm14403
ENSMUSG00000074519	Etohi1 (Zfp971)
ENSMUSG00000074521	Gm14327
ENSMUSG00000074527	Gm14296
ENSMUSG00000074529	C330013J21Rik (Zfp972)
ENSMUSG00000078861	Zfp931
ENSMUSG00000078862	Gm14326
ENSMUSG00000078863	Gm14325
ENSMUSG00000078864	Gm14322
ENSMUSG00000078865	Gm14406
ENSMUSG00000078866	Gm14420 (Zfp970)
ENSMUSG00000078867	Gm14418
ENSMUSG00000078868	Gm14412
ENSMUSG00000078870	Gm14410
ENSMUSG00000078872	Gm14401
ENSMUSG00000078875	Gm14419
ENSMUSG00000078876	Gm14408
ENSMUSG00000078877	Gm14295
ENSMUSG00000078878	Gm14305
ENSMUSG00000078879	Gm14306 (Zfp973)
ENSMUSG00000078880	Gm14308
ENSMUSG00000078881	Gm14434
ENSMUSG00000078882	Gm14431 (Zfp967)
ENSMUSG00000078883	Gm14430
ENSMUSG00000078884	Gm14436
ENSMUSG00000078885	Gm14432
ENSMUSG00000078886	Gm2026
ENSMUSG00000078887	Gm6710
ENSMUSG00000078888	Gm2007
ENSMUSG00000078889	Gm14288
ENSMUSG00000078890	Gm11007
ENSMUSG00000078891	Gm11008
ENSMUSG00000078893	Gm2004
ENSMUSG00000078894	2210418O10Rik
ENSMUSG00000078895	Gm11009
ENSMUSG00000078896	Gm8923 (Zfp965)
ENSMUSG00000078897	Gm4724
ENSMUSG00000078898	Gm4723 (Zfp968)
ENSMUSG00000078899	Gm4631
ENSMUSG00000078901	Gm14440
ENSMUSG00000078902	Gm14443
ENSMUSG00000078903	Gm14391
ENSMUSG00000078905	Gm14393
ENSMUSG00000078906	Gm14444
ENSMUSG00000089756	Gm8898 (Zfp966)
ENSMUSG00000089951	Gm14435 (Zfp968-ps)
ENSMUSG00000090093	Gm14399
ENSMUSG00000090221	Gm4245 (Zfp969)
ENSMUSG00000078503	Gm13225 (Zfp990)
ENSMUSG00000058186	Gm13242 (Zfp980)
ENSMUSG00000078502	Gm13212 (Zfp268)
ENSMUSG00000078500	Gm13235 (Zfp986)
ENSMUSG00000063245	Gm13248 (Zfp993)
ENSMUSG00000056300	Gm13247 (Zfp981)
ENSMUSG00000070605	Gm13251 (Zfp992)
ENSMUSG00000078499	Rex2
ENSMUSG00000066009	Gm13051 (Zfp987)
ENSMUSG00000066007	Zfp600
ENSMUSG00000086147	Gm13150 (Zfp989)
ENSMUSG00000067919	Gm13138
ENSMUSG00000067916	Gm13139 (Zfp991)
ENSMUSG00000078498	Gm13151 (Zfp988)
ENSMUSG00000078497	Gm13145 (Zfp978)
ENSMUSG00000078496	Gm13152 (Zfp982)
ENSMUSG00000065999	Gm13154 (Zfp985)
ENSMUSG00000066000	2610305D13Rik (Zfp979)
ENSMUSG00000062518	Zfp534
ENSMUSG00000078495	Gm13157 (Zfp984)
ENSMUSG00000059423	Zfp933
ENSMUSG00000023284	Zfp605
ENSMUSG00000066613	Zfp932
ENSMUSG00000090015	Gm15446
ENSMUSG00000029729	Zkscan1
ENSMUSG00000037007	Zfp113
ENSMUSG00000036898	Zfp157
ENSMUSG00000056014	A430033K04Rik
ENSMUSG00000058291	Zfp68
ENSMUSG00000029587	Zfp12
ENSMUSG00000046658	Zfp316
ENSMUSG00000061898	Rbak
ENSMUSG00000007812	Zfp655
ENSMUSG00000029627	Zkscan14
ENSMUSG00000055991	Zkscan5
ENSMUSG00000070420	Zfp498
ENSMUSG00000025821	Zfp282
ENSMUSG00000045466	Zfp956
ENSMUSG00000051499	Zfp786
ENSMUSG00000052763	Zfp212
ENSMUSG00000057691	Zfp746
ENSMUSG00000062519	Zfp398
ENSMUSG00000071477	Zfp777
ENSMUSG00000030145	Zfp248
ENSMUSG00000072623	Zfp9
ENSMUSG00000030443	Zfp583
ENSMUSG00000054893	Zfp667
ENSMUSG00000055150	Zfp78
ENSMUSG00000062861	Zfp28
ENSMUSG00000034538	Zfp418
ENSMUSG00000062116	Zfp954
ENSMUSG00000063535	Zfp773
ENSMUSG00000066838	Zfp772
ENSMUSG00000030386	Zfp606
ENSMUSG00000034071	Zfp551
ENSMUSG00000004500	Zfp324
ENSMUSG00000033961	Zfp446
ENSMUSG00000058638	Zfp110
ENSMUSG00000060397	Zfp128
ENSMUSG00000030486	Zfp108
ENSMUSG00000047603	Zfp235
ENSMUSG00000050605	Zfp61
ENSMUSG00000052675	Zfp112
ENSMUSG00000055305	Zfp93
ENSMUSG00000057101	Zfp180
ENSMUSG00000068962	Zfp114
ENSMUSG00000074282	Zfp94
ENSMUSG00000074283	Zfp109
ENSMUSG00000087598	Zfp111
ENSMUSG00000020420	Zfp607
ENSMUSG00000030604	Zfp626
ENSMUSG00000037640	Zfp60
ENSMUSG00000057093	C030039L03Rik
ENSMUSG00000063047	Zfp780b
ENSMUSG00000070709	1700049G17Rik
ENSMUSG00000078779	Zfp59
ENSMUSG00000011427	Zfp790
ENSMUSG00000046185	Zfp84
ENSMUSG00000047473	Zfp30
ENSMUSG00000050855	Zfp940
ENSMUSG00000053985	Zfp14
ENSMUSG00000058447	Zfp82
ENSMUSG00000059975	Zfp74
ENSMUSG00000062040	Zfp27
ENSMUSG00000074220	Zfp382
ENSMUSG00000074221	Zfp568
ENSMUSG00000078768	Zfp566
ENSMUSG00000056383	AI987944
ENSMUSG00000074165	Zfp788
ENSMUSG00000074166	AW146154
ENSMUSG00000090744	Gm6871
ENSMUSG00000091474	2610021A01Rik
ENSMUSG00000069727	Gm5595 (Zfp975)
ENSMUSG00000074158	9830147E19Rik
ENSMUSG00000091594	Gm17067
ENSMUSG00000092225	Gm2381
ENSMUSG00000092335	Gm7221 (ZFP977）
ENSMUSG00000092416	Zfp141
ENSMUSG00000012640	Zfp715
ENSMUSG00000064194	Zfp936
ENSMUSG00000074887	EU599041
ENSMUSG00000030469	Zfp719
ENSMUSG00000055102	Zfp819
ENSMUSG00000056592	Zfp658
ENSMUSG00000030823	9130019O22Rik
ENSMUSG00000045251	Zfp688
ENSMUSG00000045757	Zfp764
ENSMUSG00000048921	Zfp689
ENSMUSG00000054381	Zfp747
ENSMUSG00000078580	E430018J23Rik
ENSMUSG00000043090	Zfp866
ENSMUSG00000054648	Zfp869
ENSMUSG00000060427	Zfp868
ENSMUSG00000091764	Zfp964
ENSMUSG00000092260	Zfp963
ENSMUSG00000092544	Gm20422
ENSMUSG00000052446	Zfp961
ENSMUSG00000056019	Zfp709
ENSMUSG00000066880	Zfp617
ENSMUSG00000089857	Zfp882
ENSMUSG00000045519	Zfp560
ENSMUSG00000058192	Zfp846
ENSMUSG00000059475	Zfp426
ENSMUSG00000060510	Zfp266
ENSMUSG00000063108	Zfp26
ENSMUSG00000057982	Zfp809
ENSMUSG00000062794	Zfp599
ENSMUSG00000066829	Zfp810
ENSMUSG00000074472	Zfp872
ENSMUSG00000062540	Zfp781
ENSMUSG00000074860	Gm10778
ENSMUSG00000078436	Gm4767
ENSMUSG00000078437	Gm3055
ENSMUSG00000062931	Zfp938
ENSMUSG00000078435	AU041133
ENSMUSG00000020335	Zfp354b
ENSMUSG00000020364	Zfp354a
ENSMUSG00000044296	Zfp879
ENSMUSG00000044807	Zfp354c
ENSMUSG00000048728	Zfp454
ENSMUSG00000020491	2810021J22Rik
ENSMUSG00000037001	Zfp39
ENSMUSG00000068869	Gm12258
ENSMUSG00000020472	Zkscan17
ENSMUSG00000054519	Zfp867
ENSMUSG00000005267	Zfp287
ENSMUSG00000047342	Zfp286
ENSMUSG00000062632	Gm12588
ENSMUSG00000078564	Gm9631
ENSMUSG00000021327	Zkscan3
ENSMUSG00000063894	Zfp192
ENSMUSG00000055228	Zfp935
ENSMUSG00000072066	6720489N17Rik
ENSMUSG00000074865	Zfp934
ENSMUSG00000074867	Zfp808
ENSMUSG00000021510	A530054K11Rik
ENSMUSG00000030446	Zfp273
ENSMUSG00000048280	Zfp738
ENSMUSG00000051037	Zfp455
ENSMUSG00000052909	Gm9894
ENSMUSG00000055341	Zfp457
ENSMUSG00000055480	Zfp458
ENSMUSG00000055560	Zfp459
ENSMUSG00000056552	Zfp953
ENSMUSG00000057396	Zfp759
ENSMUSG00000057842	Zfp595
ENSMUSG00000058093	AA987161
ENSMUSG00000058246	Gm10037
ENSMUSG00000058331	Zfp85-rs1
ENSMUSG00000058883	Zfp708
ENSMUSG00000058900	Rsl1
ENSMUSG00000059839	Zfp874b
ENSMUSG00000069204	Zfp748
ENSMUSG00000069206	Zfp874a
ENSMUSG00000071281	Zfp71-rs1
ENSMUSG00000071285	Zfp87
ENSMUSG00000071291	Zfp58
ENSMUSG00000071295	Gm10323
ENSMUSG00000074824	Rslcan18
ENSMUSG00000074830	Zfp640
ENSMUSG00000078994	Zfp429
ENSMUSG00000078995	Zfp456
ENSMUSG00000090641	Zfp712
ENSMUSG00000090659	Zfp493
ENSMUSG00000069184	Zfp72
ENSMUSG00000069208	Zfp825
ENSMUSG00000022526	Zfp251
ENSMUSG00000033669	Zfp7
ENSMUSG00000054967	Zfp647
ENSMUSG00000022529	Zfp263
ENSMUSG00000039789	Zfp597
ENSMUSG00000067034	Zfp960
ENSMUSG00000072761	Gm6712
ENSMUSG00000073452	Zfp97
ENSMUSG00000023882	Zfp54
ENSMUSG00000023892	Zfp51
ENSMUSG00000033972	Zfp944
ENSMUSG00000035868	3110052M02Rik
ENSMUSG00000044501	Zfp758
ENSMUSG00000051341	Zfp52
ENSMUSG00000053347	Zfp943
ENSMUSG00000057409	Zfp53
ENSMUSG00000061544	Zfp229
ENSMUSG00000062743	Zfp677
ENSMUSG00000063383	Zfp947
ENSMUSG00000067928	Zfp760
ENSMUSG00000067931	Zfp948
ENSMUSG00000069743	Zfp820
ENSMUSG00000071266	Zfp946
ENSMUSG00000071267	Zfp942
ENSMUSG00000078546	2210404O09Rik
ENSMUSG00000062012	Zfp13
ENSMUSG00000071256	Zfp213
ENSMUSG00000003929	Zfp81
ENSMUSG00000008686	Zfp955a
ENSMUSG00000024298	Zfp871
ENSMUSG00000053390	Zfp952
ENSMUSG00000053600	Zfp472
ENSMUSG00000055202	Zfp811
ENSMUSG00000055240	Zfp101
ENSMUSG00000057254	Zfp870
ENSMUSG00000059000	Zfp799
ENSMUSG00000061532	Zfp955b
ENSMUSG00000067424	Zfp563
ENSMUSG00000067430	Zfp763
ENSMUSG00000003198	Zfp959
ENSMUSG00000057835	Zfp119a
ENSMUSG00000062101	Zfp119b
ENSMUSG00000023165	Ssxb2
ENSMUSG00000035371	Ssx9
ENSMUSG00000068218	Ssxb9
ENSMUSG00000068219	Ssxb10
ENSMUSG00000071816	Ssxb5
ENSMUSG00000079699	Gm6592
ENSMUSG00000079701	Ssxb3
ENSMUSG00000079703	Ssxb8
ENSMUSG00000079704	Gm14459
ENSMUSG00000079705	Ssxb1
ENSMUSG00000031079	Zfp300
ENSMUSG00000054737	Zfp182
ENSMUSG00000062814	Ssxa1
ENSMUSG00000040596	Pogk
ENSMUSG00000034800	Zfp661
ENSMUSG00000033883	D3Ertd254e
ENSMUSG00000028389	Zfp37
ENSMUSG00000038630	Zkscan16
ENSMUSG00000039634	Zfp189
ENSMUSG00000051351	Zfp46
ENSMUSG00000064141	Zfp69
ENSMUSG00000072774	Zfp951
ENSMUSG00000061969	Gm5581
ENSMUSG00000002266	Zim1
ENSMUSG00000030393	Zik1
ENSMUSG00000030757	Zkscan2
ENSMUSG00000048012	Zfp473
ENSMUSG00000060314	Zfp941
ENSMUSG00000068959	Zfp619
ENSMUSG00000031907	Zfp90
ENSMUSG00000044676	Zfp612
ENSMUSG00000055835	Zfp1
ENSMUSG00000058748	Zfp958
ENSMUSG00000059897	Zfp930
ENSMUSG00000074194	Zfp791
ENSMUSG00000091388	Gm17576
ENSMUSG00000025602	Zfp202
ENSMUSG00000032425	Zfp949
ENSMUSG00000043773	1700048O20Rik
ENSMUSG00000047036	Zfp445
ENSMUSG00000057551	Zfp317
ENSMUSG00000074500	Zfp558
ENSMUSG00000074829	2010315B03Rik
ENSMUSG00000050844	1700020N01Rik
ENSMUSG00000060301	2610008E11Rik
ENSMUSG00000018347	Zkscan6
ENSMUSG00000060630	Zfp735
ENSMUSG00000069476	Zfp616
ENSMUSG00000042063	Zfp386
ENSMUSG00000073158	9030624G23Rik
ENSMUSG00000073184	Gm10479
ENSMUSG00000073197	5730507C01Rik
ENSMUSG00000006720	Zfp184
ENSMUSG00000021514	Zfp369
ENSMUSG00000050954	Zfp169
ENSMUSG00000071302	Gm10324
ENSMUSG00000074832	2410141K09Rik (Zfp998)
ENSMUSG00000022987	Zfp641
ENSMUSG00000034429	Zfp707
ENSMUSG00000080717	B230307C23Rik
ENSMUSG00000002617	Zfp40
ENSMUSG00000051977	Prdm9
ENSMUSG00000059142	Zfp945
ENSMUSG00000067942	Zfp160
ENSMUSG00000092139	NCBIM37
ENSMUSG00000031374	Zfp92
ENSMUSG00000079697	Gm5751

## Sheet: CB YO
Gene	baseMean	log2FoldChange	lfcSE	stat	pvalue	padj	Volcano FDR
ENSMUSG00000031374	60.2041	1.08647	0.353148	3.07652	0.00209435	0.038977	1.40919
ENSMUSG00000031374	Zfp92
ENSMUSG00000036036	97.434	-1.81287	0.173472	-10.4505	1.45746e-25	5.20173e-23	22.2839
ENSMUSG00000036036	Zfp57
ENSMUSG00000038630	1114.62	0.416163	0.111145	3.74434	0.000180866	0.00557409	2.25383
ENSMUSG00000038630	Zkscan16
ENSMUSG00000040596	6438.71	-0.133143	0.0445423	-2.98914	0.00279764	0.0483643	1.31548
ENSMUSG00000040596	Pogk
ENSMUSG00000060336	370.92	0.35389	0.106652	3.31819	0.000906028	0.0209494	1.67883
ENSMUSG00000060336	Zfp937
ENSMUSG00000061969	6.11008	3.06821	0.775002	3.95897	7.52736e-05	0.00269088	2.57011
ENSMUSG00000061969	Gm5581
ENSMUSG00000062861	587.547	0.283884	0.0771272	3.68073	0.000232566	0.00690766	2.16067
ENSMUSG00000062861	Zfp28
ENSMUSG00000068130	626.949	0.382133	0.0886529	4.31044	1.62928e-05	0.000677682	3.16897
ENSMUSG00000068130	Zfp442
ENSMUSG00000072066	178.803	0.5437	0.166852	3.25856	0.00111978	0.0246797	1.60766
ENSMUSG00000072066	6720489N17Rik
ENSMUSG00000072762	375.539	0.698475	0.102992	6.78183	1.18665e-11	1.38932e-09	8.8572
ENSMUSG00000072762	4930522L14Rik
ENSMUSG00000072763	248.246	0.54434	0.123746	4.39883	1.08834e-05	0.00047407	3.32416
ENSMUSG00000072763	5430403G16Rik
ENSMUSG00000072774	343.545	0.467505	0.0992294	4.71135	2.46081e-06	0.000126048	3.89946
ENSMUSG00000072774	Zfp951
ENSMUSG00000074166	377.41	0.347179	0.11217	3.09511	0.00196742	0.0374657	1.42637
ENSMUSG00000074166	AW146154
ENSMUSG00000074865	332.168	0.456214	0.104771	4.35437	1.33452e-05	0.000568984	3.2449
ENSMUSG00000074865	Zfp934
ENSMUSG00000074867	125.781	0.777978	0.173715	4.47847	7.51783e-06	0.000342999	3.46471
ENSMUSG00000074867	Zfp808
ENSMUSG00000078866	1045.47	0.289898	0.0872776	3.32156	0.000895152	0.020763	1.68271
ENSMUSG00000078866	Gm14420 (Zfp970)
ENSMUSG00000091183	582.973	0.550425	0.0676024	8.14209	3.88519e-16	7.04683e-14	13.152
ENSMUSG00000091183	Gm3604
ENSMUSG00000091764	404.422	0.254446	0.0806512	3.1549	0.00160553	0.0324144	1.48926
ENSMUSG00000091764	Zfp964
ENSMUSG00000000078	2375.67	0.432053	0.0867949	4.97785	6.42929e-07	3.67616e-05	4.43461
ENSMUSG00000000275	253.864	0.860406	0.148755	5.78406	7.29175e-09	6.13505e-07	6.21218
ENSMUSG00000000290	201.582	1.842	0.134727	13.6722	1.489e-42	1.49767e-39	38.8246
ENSMUSG00000000305	837.217	-0.355766	0.103993	-3.42106	0.000623776	0.0154142	1.81208
ENSMUSG00000000386	40.4274	2.69291	0.3861	6.97464	3.0666e-12	3.92241e-10	9.40645
ENSMUSG00000000409	8.93933	1.52925	0.51123	2.99132	0.0027777	0.0481323	1.31756
ENSMUSG00000000440	200.795	0.43973	0.111703	3.93659	8.26461e-05	0.00291209	2.5358
ENSMUSG00000000560	1095.39	-0.669462	0.0817547	-8.18866	2.64144e-16	4.95338e-14	13.3051
ENSMUSG00000000682	80.3861	2.27133	0.251224	9.04107	1.55152e-19	3.9921e-17	16.3988
ENSMUSG00000000732	483.493	0.482534	0.11428	4.22238	2.41733e-05	0.0009501	3.02223
ENSMUSG00000000982	21.367	2.74351	0.381885	7.18414	6.76333e-13	9.18153e-11	10.0371
ENSMUSG00000001025	218.733	0.516797	0.164699	3.13783	0.00170202	0.0338081	1.47098
ENSMUSG00000001123	131.709	0.78892	0.151565	5.20517	1.93816e-07	1.2324e-05	4.90925
ENSMUSG00000001131	19.4478	1.30957	0.343231	3.81542	0.000135952	0.00444365	2.35226
ENSMUSG00000001166	41.1234	1.23501	0.34381	3.59215	0.000327965	0.00918635	2.03686
ENSMUSG00000001281	183.098	0.519117	0.128548	4.03832	5.38352e-05	0.00199877	2.69924
ENSMUSG00000001334	7426.99	-0.179768	0.0583537	-3.08066	0.00206544	0.0386015	1.4134
ENSMUSG00000001506	324.118	-1.85497	0.157129	-11.8054	3.66151e-32	1.97614e-29	28.7042
ENSMUSG00000001576	3809.49	-0.246675	0.0663903	-3.71552	0.000202787	0.00611502	2.2136
ENSMUSG00000001604	30.5254	0.867391	0.256783	3.37792	0.000730374	0.0175862	1.75483
ENSMUSG00000001663	504.141	0.303541	0.0874042	3.47285	0.000514972	0.0131738	1.88029
ENSMUSG00000001768	1028.37	0.4363	0.0772375	5.64881	1.61558e-08	1.27611e-06	5.89411
ENSMUSG00000001870	199.835	-0.646606	0.150953	-4.28349	1.83983e-05	0.000755321	3.12187
ENSMUSG00000002032	2113.71	-0.272147	0.0812408	-3.34988	0.000808478	0.0191221	1.71846
ENSMUSG00000002108	360.141	0.528388	0.0995479	5.30787	1.10911e-07	7.48242e-06	5.12596
ENSMUSG00000002111	31.9434	1.08385	0.261941	4.13776	3.50708e-05	0.00134497	2.87129
ENSMUSG00000002147	440.115	0.623662	0.0944858	6.60058	4.09544e-11	4.50865e-09	8.34595
ENSMUSG00000002266	Zim1
ENSMUSG00000002274	3742.43	-0.287123	0.0931614	-3.082	0.00205615	0.0384927	1.41462
ENSMUSG00000002325	770.542	1.12851	0.140389	8.03844	9.09861e-16	1.61067e-13	12.793
ENSMUSG00000002602	1950.22	0.382158	0.082165	4.6511	3.30165e-06	0.000163443	3.78663
ENSMUSG00000002617	Zfp40
ENSMUSG00000002699	73.2162	0.996937	0.170259	5.8554	4.75867e-09	4.14566e-07	6.38241
ENSMUSG00000002985	38322.3	0.574392	0.100406	5.7207	1.06083e-08	8.63019e-07	6.06398
ENSMUSG00000002996	2783.63	0.239783	0.07318	3.27662	0.00105059	0.0234823	1.62926
ENSMUSG00000003198	Zfp959
ENSMUSG00000003282	804.505	0.819787	0.0768839	10.6627	1.52174e-26	5.61217e-24	23.2509
ENSMUSG00000003283	61.2298	1.14991	0.218507	5.26256	1.42061e-07	9.35572e-06	5.02892
ENSMUSG00000003418	141.637	0.794728	0.174077	4.56539	4.98571e-06	0.000237767	3.62385
ENSMUSG00000003657	11279	-0.308634	0.0959771	-3.21571	0.00130124	0.0275538	1.55982
ENSMUSG00000003929	Zfp81
ENSMUSG00000004043	172.209	0.483071	0.124443	3.88186	0.000103662	0.00355084	2.44967
ENSMUSG00000004110	16210.3	-0.752308	0.0908394	-8.28173	1.21398e-16	2.4421e-14	13.6122
ENSMUSG00000004266	130.542	1.21508	0.13739	8.84401	9.23421e-19	2.22103e-16	15.6534
ENSMUSG00000004500	Zfp324
ENSMUSG00000004552	8.06177	2.3982	0.632901	3.78921	0.000151126	0.00481168	2.3177
ENSMUSG00000004609	163.003	0.884886	0.128022	6.91198	4.77933e-12	5.97497e-10	9.22366
ENSMUSG00000004707	55.3338	2.92502	0.24368	12.0035	3.40396e-33	1.98218e-30	29.7029
ENSMUSG00000004730	215.883	1.46026	0.129575	11.2696	1.85364e-29	8.54528e-27	26.0683
ENSMUSG00000004952	802.193	0.407891	0.135623	3.00754	0.0026337	0.046278	1.33463
ENSMUSG00000005087	648.657	0.414437	0.116737	3.55017	0.000384984	0.0105302	1.97756
ENSMUSG00000005142	1477.66	0.432866	0.0924455	4.68239	2.83546e-06	0.000143906	3.84192
ENSMUSG00000005267	Zfp287
ENSMUSG00000005397	792.587	-0.782503	0.0933258	-8.38464	5.08805e-17	1.06215e-14	13.9738
ENSMUSG00000005410	540.081	0.218891	0.0722303	3.03045	0.00244186	0.0439654	1.35689
ENSMUSG00000005547	16.5801	-4.29893	1.14778	-3.74544	0.000180079	0.00555759	2.25511
ENSMUSG00000005803	488.455	0.923296	0.0890393	10.3695	3.41184e-25	1.19837e-22	21.9214
ENSMUSG00000006014	108.015	0.85744	0.257296	3.3325	0.000860697	0.020099	1.69682
ENSMUSG00000006204	60.7208	-0.902344	0.274009	-3.29311	0.000990841	0.0224185	1.64939
ENSMUSG00000006411	641.84	0.37833	0.0862675	4.38555	1.15694e-05	0.000500994	3.30017
ENSMUSG00000006494	1370.95	0.284606	0.0853422	3.33488	0.000853366	0.0199823	1.69935
ENSMUSG00000006519	142.429	0.972837	0.134928	7.21005	5.59327e-13	7.68744e-11	10.1142
ENSMUSG00000006522	3993.08	0.593449	0.120731	4.91545	8.85797e-07	4.98751e-05	4.30212
ENSMUSG00000006527	2634.47	0.213919	0.0715253	2.99081	0.00278238	0.0481757	1.31717
ENSMUSG00000006611	280.581	0.477816	0.140006	3.41283	0.000642931	0.0157999	1.80135
ENSMUSG00000006720	Zfp184
ENSMUSG00000007440	286.523	0.697532	0.132787	5.25302	1.49623e-07	9.77087e-06	5.01007
ENSMUSG00000007613	1098.18	0.528311	0.0984772	5.36481	8.10358e-08	5.62119e-06	5.25017
ENSMUSG00000007812	Zfp655
ENSMUSG00000007877	56.7675	1.34226	0.21524	6.23609	4.48632e-10	4.37328e-08	7.35919
ENSMUSG00000007891	5046.94	0.698575	0.0938612	7.44264	9.86948e-14	1.46572e-11	10.8339
ENSMUSG00000008305	1555.3	0.25065	0.0830126	3.01942	0.00253259	0.0450853	1.34596
ENSMUSG00000008496	203.495	-0.575796	0.191891	-3.00065	0.00269408	0.0469798	1.32809
ENSMUSG00000008686	Zfp955a
ENSMUSG00000008734	9575.55	-0.296298	0.076046	-3.8963	9.76748e-05	0.00337184	2.47213
ENSMUSG00000008789	12.2621	6.96424	0.992382	7.01769	2.25559e-12	2.95336e-10	9.52968
ENSMUSG00000009112	1852.25	-0.18442	0.0559915	-3.2937	0.000988764	0.0223944	1.64986
ENSMUSG00000009216	135.297	0.912022	0.290386	3.14072	0.00168534	0.0336277	1.4733
ENSMUSG00000009376	62.9744	1.61005	0.263294	6.11502	9.65441e-10	9.01404e-08	7.04508
ENSMUSG00000009394	7389.62	-0.212447	0.0646463	-3.2863	0.00101513	0.0228513	1.64109
ENSMUSG00000009535	5363.54	0.229057	0.0719941	3.18161	0.00146459	0.0301747	1.52036
ENSMUSG00000009670	18.5423	2.20347	0.389531	5.65674	1.54273e-08	1.22797e-06	5.91081
ENSMUSG00000010080	734.497	-0.492075	0.125092	-3.93371	8.3645e-05	0.0029426	2.53127
ENSMUSG00000010358	113.941	0.938851	0.186098	5.04493	4.53694e-07	2.69151e-05	4.57
ENSMUSG00000010461	104.711	1.60355	0.194617	8.23953	1.72895e-16	3.3268e-14	13.478
ENSMUSG00000011171	564.6	0.756536	0.198893	3.80373	0.000142531	0.00461741	2.3356
ENSMUSG00000011256	613.089	-0.613074	0.108828	-5.63344	1.76649e-08	1.38123e-06	5.85973
ENSMUSG00000011427	Zfp790
ENSMUSG00000012640	Zfp715
ENSMUSG00000013033	9890.58	-0.38952	0.115	-3.38713	0.000706276	0.0170431	1.76845
ENSMUSG00000013584	299.175	0.541929	0.170384	3.18064	0.0014695	0.0301923	1.5201
ENSMUSG00000013766	60.3433	0.640953	0.194799	3.29033	0.00100072	0.0226189	1.64553
ENSMUSG00000014776	213.787	0.609007	0.160352	3.79794	0.000145905	0.00468589	2.32921
ENSMUSG00000015243	7601.94	0.323248	0.0583307	5.54165	2.99637e-08	2.21012e-06	5.65558
ENSMUSG00000015340	136.753	2.48174	0.164708	15.0675	2.65131e-51	4.51294e-48	47.3455
ENSMUSG00000015355	37.6787	2.32955	0.279843	8.32448	8.46989e-17	1.73539e-14	13.7606
ENSMUSG00000015568	133.826	2.08267	0.256561	8.11763	4.75377e-16	8.55215e-14	13.0679
ENSMUSG00000015829	6023.29	-0.394435	0.0813244	-4.85015	1.2337e-06	6.65837e-05	4.17663
ENSMUSG00000015839	928.719	0.445237	0.0985238	4.51908	6.2108e-06	0.000288119	3.54043
ENSMUSG00000015879	855.13	-0.415156	0.0934462	-4.44273	8.88253e-06	0.000396275	3.402
ENSMUSG00000015950	144.216	0.775412	0.140629	5.5139	3.50962e-08	2.53794e-06	5.59552
ENSMUSG00000016206	66.7749	1.26794	0.217446	5.83108	5.50706e-09	4.74164e-07	6.32407
ENSMUSG00000016256	1332.62	0.839874	0.0929416	9.03658	1.61651e-19	4.1115e-17	16.386
ENSMUSG00000016262	273.476	-0.41474	0.11927	-3.47733	0.000506435	0.0130207	1.88536
ENSMUSG00000016346	7109.77	-0.278173	0.0710675	-3.91421	9.06989e-05	0.00316559	2.49955
ENSMUSG00000016477	495.209	-0.473695	0.104459	-4.53476	5.76679e-06	0.000270929	3.56714
ENSMUSG00000016496	111.506	1.57053	0.182442	8.60837	7.4108e-18	1.70819e-15	14.7675
ENSMUSG00000016534	5248.17	0.247919	0.0655971	3.77942	0.000157194	0.00496205	2.30434
ENSMUSG00000016918	2187.17	0.339687	0.110183	3.08294	0.00204964	0.0384359	1.41526
ENSMUSG00000016946	1200.13	-0.179631	0.058569	-3.06699	0.00216224	0.0398385	1.3997
ENSMUSG00000017167	6435.08	-0.332267	0.1073	-3.09661	0.0019575	0.0374354	1.42672
ENSMUSG00000017418	2694.83	-0.215526	0.060261	-3.57654	0.000348172	0.00967883	2.01418
ENSMUSG00000017667	Zfp334
ENSMUSG00000017670	7399.95	-0.146031	0.0476649	-3.0637	0.00218618	0.0401125	1.39672
ENSMUSG00000017724	260.95	-0.641366	0.141866	-4.52093	6.15691e-06	0.000286219	3.5433
ENSMUSG00000017830	102.194	0.858428	0.163101	5.26318	1.41588e-07	9.35242e-06	5.02908
ENSMUSG00000018008	208.556	0.961936	0.12966	7.41889	1.18107e-13	1.74231e-11	10.7589
ENSMUSG00000018042	1880.43	0.263705	0.0607848	4.33834	1.43561e-05	0.000604967	3.21827
ENSMUSG00000018339	111.713	0.892802	0.234512	3.80706	0.00014063	0.00456955	2.34013
ENSMUSG00000018347	Zkscan6
ENSMUSG00000018381	43.6964	0.994971	0.250809	3.96705	7.27665e-05	0.00261392	2.58271
ENSMUSG00000018554	26.7084	-1.02409	0.309705	-3.30667	0.000944104	0.0216488	1.66457
ENSMUSG00000018566	216.939	0.424899	0.124868	3.40278	0.000667035	0.0162916	1.78804
ENSMUSG00000018654	53.2882	1.05029	0.206895	5.07643	3.84602e-07	2.31893e-05	4.63471
ENSMUSG00000018774	206.512	1.67372	0.141411	11.8359	2.54744e-32	1.40924e-29	28.851
ENSMUSG00000018819	112.563	1.16707	0.171161	6.81856	9.19581e-12	1.09992e-09	8.95864
ENSMUSG00000018899	190.761	0.781212	0.155432	5.02606	5.00648e-07	2.93078e-05	4.53302
ENSMUSG00000018920	78.2333	1.3739	0.192152	7.15006	8.67395e-13	1.16326e-10	9.93432
ENSMUSG00000018927	44.6114	1.60444	0.233089	6.88337	5.84542e-12	7.22612e-10	9.14109
ENSMUSG00000018930	6.91365	3.62252	0.819952	4.41797	9.96329e-06	0.000440055	3.35649
ENSMUSG00000019232	5145.51	0.675655	0.14025	4.81749	1.45376e-06	7.73287e-05	4.11166
ENSMUSG00000019487	196.75	0.510367	0.136454	3.74022	0.00018386	0.00565849	2.2473
ENSMUSG00000019489	39.626	-0.690928	0.2267	-3.04776	0.00230552	0.0418856	1.37794
ENSMUSG00000019820	12093.5	0.326061	0.0562085	5.80092	6.5951e-09	5.59143e-07	6.25248
ENSMUSG00000019822	429.191	0.23311	0.075533	3.0862	0.00202731	0.0381078	1.41899
ENSMUSG00000019823	345.465	0.320073	0.102362	3.12687	0.00176678	0.0346897	1.4598
ENSMUSG00000019832	68.687	0.682623	0.181358	3.76395	0.000167249	0.00522952	2.28154
ENSMUSG00000019880	367.138	0.520918	0.113038	4.60834	4.05902e-06	0.000195682	3.70845
ENSMUSG00000019891	282.859	-0.633046	0.125292	-5.05258	4.35876e-07	2.59276e-05	4.58624
ENSMUSG00000019929	963.081	0.549964	0.147712	3.72322	0.000196702	0.00597067	2.22398
ENSMUSG00000019961	4471.41	0.193506	0.0555315	3.48461	0.000492846	0.0127851	1.8933
ENSMUSG00000020044	4536.57	0.31059	0.0951752	3.26335	0.00110103	0.0243637	1.61326
ENSMUSG00000020101	731.266	0.477663	0.114993	4.15385	3.26921e-05	0.0012625	2.89877
ENSMUSG00000020120	1101.02	0.621678	0.0759446	8.18593	2.70198e-16	5.02432e-14	13.2989
ENSMUSG00000020140	639.067	-0.413387	0.10745	-3.84726	0.000119447	0.00395084	2.40331
ENSMUSG00000020143	214.703	1.32767	0.112489	11.8027	3.78152e-32	1.99232e-29	28.7006
ENSMUSG00000020150	170.149	-0.410904	0.133073	-3.0878	0.00201641	0.0380716	1.4194
ENSMUSG00000020176	2431.39	0.406971	0.104727	3.88604	0.000101894	0.00349567	2.45647
ENSMUSG00000020181	2082.77	-0.369439	0.0982535	-3.76006	0.000169872	0.00529426	2.27619
ENSMUSG00000020228	448.059	0.403518	0.0863658	4.67219	2.98005e-06	0.000149869	3.82429
ENSMUSG00000020327	153.81	0.55247	0.16083	3.43512	0.000592292	0.0148093	1.82947
ENSMUSG00000020335	Zfp354b
ENSMUSG00000020364	Zfp354a
ENSMUSG00000020380	1083.6	0.207358	0.0667778	3.10519	0.00190157	0.0367815	1.43437
ENSMUSG00000020399	84.7395	1.11761	0.222276	5.02801	4.95587e-07	2.90884e-05	4.53628
ENSMUSG00000020420	Zfp607
ENSMUSG00000020431	99727.9	-0.344753	0.101511	-3.3962	0.000683295	0.0165971	1.77997
ENSMUSG00000020437	20.4408	1.22228	0.359405	3.40083	0.000671814	0.0163574	1.78629
ENSMUSG00000020464	1892.2	0.224449	0.0632533	3.54842	0.000387549	0.0105668	1.97606
ENSMUSG00000020467	788.728	0.790241	0.0891501	8.86416	7.70823e-19	1.87437e-16	15.7271
ENSMUSG00000020472	Zkscan17
ENSMUSG00000020473	597.192	0.693229	0.160624	4.31585	1.58989e-05	0.000662543	3.17879
ENSMUSG00000020491	2810021J22Rik
ENSMUSG00000020527	345.934	-0.431285	0.141503	-3.0479	0.0023045	0.0418856	1.37794
ENSMUSG00000020573	122.498	0.857484	0.138407	6.19536	5.81504e-10	5.59457e-08	7.25223
ENSMUSG00000020591	1628.72	-0.287953	0.0935963	-3.07654	0.00209419	0.038977	1.40919
ENSMUSG00000020601	1686.99	-0.322115	0.105885	-3.04213	0.00234913	0.0425034	1.37158
ENSMUSG00000020610	1629.62	-0.173916	0.0536648	-3.24078	0.00119201	0.0259219	1.58633
ENSMUSG00000020620	3065.09	-0.26706	0.0746231	-3.57878	0.000345198	0.00960823	2.01736
ENSMUSG00000020638	830.93	0.576502	0.135793	4.24544	2.1816e-05	0.000872956	3.05901
ENSMUSG00000020640	3476.85	0.28479	0.0499739	5.69877	1.20676e-08	9.74567e-07	6.01119
ENSMUSG00000020641	174.509	1.52707	0.222342	6.8681	6.50615e-12	7.91033e-10	9.10181
ENSMUSG00000020644	4997.42	-0.367698	0.0820096	-4.4836	7.33946e-06	0.000336248	3.47334
ENSMUSG00000020653	329.203	0.313668	0.104456	3.00286	0.00267454	0.0467946	1.3298
ENSMUSG00000020723	478.898	-0.374593	0.115274	-3.2496	0.00115569	0.0252949	1.59697
ENSMUSG00000020794	1896.31	-0.205567	0.068262	-3.01144	0.00260016	0.046029	1.33697
ENSMUSG00000020814	219.792	0.477511	0.121192	3.94011	8.14452e-05	0.00287435	2.54146
ENSMUSG00000020848	1396.03	-0.422336	0.129394	-3.26395	0.0010987	0.0243363	1.61375
ENSMUSG00000020865	59.4724	0.58254	0.180004	3.23626	0.00121108	0.0261197	1.58303
ENSMUSG00000020891	181.964	0.502688	0.168455	2.9841	0.00284412	0.0490146	1.30967
ENSMUSG00000020922	1052.48	-0.265755	0.0659865	-4.02741	5.63947e-05	0.00208331	2.68125
ENSMUSG00000020932	8098.93	1.16531	0.102953	11.3188	1.05853e-29	5.092e-27	26.2931
ENSMUSG00000020990	1058.61	0.360058	0.111354	3.23344	0.00122307	0.0263014	1.58002
ENSMUSG00000021069	68.2139	0.831085	0.264837	3.1381	0.00170046	0.0338081	1.47098
ENSMUSG00000021070	93.4689	1.01722	0.211066	4.81942	1.43974e-06	7.67674e-05	4.11482
ENSMUSG00000021090	311.647	0.383437	0.118434	3.23756	0.00120558	0.0260518	1.58416
ENSMUSG00000021091	238.236	1.91653	0.20401	9.3943	5.75981e-21	1.65524e-18	17.7811
ENSMUSG00000021102	588.506	-0.295426	0.0910859	-3.24338	0.00118121	0.0257515	1.5892
ENSMUSG00000021115	860.048	0.207823	0.0659173	3.15278	0.00161722	0.0325918	1.48689
ENSMUSG00000021134	14344.6	0.19137	0.0552388	3.46442	0.000531377	0.0135464	1.86818
ENSMUSG00000021136	312.72	0.482615	0.119876	4.02596	5.67443e-05	0.00209273	2.67929
ENSMUSG00000021186	357.008	0.804494	0.212788	3.78073	0.00015637	0.00495014	2.30538
ENSMUSG00000021217	656.814	-0.500719	0.125712	-3.98305	6.8037e-05	0.00246403	2.60835
ENSMUSG00000021242	1859.47	0.321015	0.0955531	3.35954	0.000780711	0.0185759	1.73105
ENSMUSG00000021256	655.394	-0.403699	0.116112	-3.47679	0.000507458	0.0130207	1.88536
ENSMUSG00000021277	1647.03	-0.353162	0.0889225	-3.97158	7.13983e-05	0.00257313	2.58954
ENSMUSG00000021280	177.102	0.619198	0.162843	3.80242	0.000143291	0.00462881	2.33453
ENSMUSG00000021281	61.956	0.697278	0.223146	3.12477	0.00177945	0.0348458	1.45785
ENSMUSG00000021327	Zkscan3
ENSMUSG00000021423	255.916	0.885827	0.126342	7.01133	2.36061e-12	3.07268e-10	9.51248
ENSMUSG00000021470	2739.64	0.242852	0.0657912	3.69125	0.000223151	0.00664588	2.17745
ENSMUSG00000021474	1740.12	0.197712	0.063908	3.09369	0.00197681	0.037612	1.42467
ENSMUSG00000021510	A530054K11Rik
ENSMUSG00000021514	Zfp369
ENSMUSG00000021583	728.904	0.398846	0.123767	3.22256	0.0012705	0.027093	1.56714
ENSMUSG00000021594	232.794	-0.321163	0.0988932	-3.24757	0.00116395	0.0254253	1.59473
ENSMUSG00000021624	52.7105	1.39455	0.275561	5.06075	4.17613e-07	2.49082e-05	4.60366
ENSMUSG00000021665	2706.42	0.898871	0.0973763	9.2309	2.68367e-20	7.15474e-18	17.1454
ENSMUSG00000021676	321.459	0.514438	0.134825	3.81559	0.000135858	0.00444365	2.35226
ENSMUSG00000021822	74.2007	1.17963	0.191031	6.17507	6.61335e-10	6.33507e-08	7.19825
ENSMUSG00000021876	305.899	0.735388	0.137362	5.35363	8.62066e-08	5.96119e-06	5.22467
ENSMUSG00000021886	13.6026	1.40056	0.439882	3.18393	0.00145289	0.0300463	1.52221
ENSMUSG00000021890	936.975	-0.245599	0.0814292	-3.01611	0.00256043	0.0455077	1.34191
ENSMUSG00000021974	1780.01	-0.274938	0.080369	-3.42095	0.000624037	0.0154142	1.81208
ENSMUSG00000021998	643.497	0.561909	0.0992159	5.66349	1.48322e-08	1.18486e-06	5.92633
ENSMUSG00000022014	37.9933	1.63444	0.254469	6.42293	1.33674e-10	1.39526e-08	7.85535
ENSMUSG00000022148	101.127	1.04765	0.224928	4.65769	3.19774e-06	0.00015901	3.79857
ENSMUSG00000022176	166.825	-1.2235	0.147819	-8.27698	1.26335e-16	2.5185e-14	13.5989
ENSMUSG00000022177	160.997	0.54001	0.120916	4.46599	7.9698e-06	0.000360646	3.44292
ENSMUSG00000022216	511.611	0.436098	0.112786	3.86658	0.000110372	0.00372873	2.42844
ENSMUSG00000022218	5.97969	4.71549	1.04244	4.52352	6.08184e-06	0.000283922	3.5468
ENSMUSG00000022231	4137.88	0.591047	0.111483	5.30166	1.14754e-07	7.71817e-06	5.11249
ENSMUSG00000022311	2788.32	-0.61081	0.161472	-3.78275	0.000155103	0.00492412	2.30767
ENSMUSG00000022360	1380.51	0.260227	0.0772319	3.36943	0.00075325	0.0180976	1.74238
ENSMUSG00000022372	894.352	0.455347	0.131764	3.45578	0.000548706	0.013924	1.85623
ENSMUSG00000022376	2479.77	-0.18078	0.0567588	-3.18505	0.00144728	0.0299583	1.52348
ENSMUSG00000022415	12281.5	-0.233581	0.072513	-3.22124	0.00127639	0.0271616	1.56604
ENSMUSG00000022421	4430	-0.367236	0.116663	-3.14784	0.00164481	0.0330276	1.48112
ENSMUSG00000022439	46.6677	1.14245	0.22901	4.98864	6.0805e-07	3.50389e-05	4.45545
ENSMUSG00000022468	75.4575	0.690204	0.21821	3.16303	0.00156136	0.031697	1.49898
ENSMUSG00000022488	299.506	1.03692	0.123425	8.40121	4.41884e-17	9.40192e-15	14.0268
ENSMUSG00000022505	914.82	-0.271212	0.0788943	-3.43766	0.000586756	0.0146875	1.83305
ENSMUSG00000022526	Zfp251
ENSMUSG00000022529	Zfp263
ENSMUSG00000022548	10157.1	0.568335	0.0924035	6.15058	7.72016e-10	7.23863e-08	7.14034
ENSMUSG00000022575	66.9159	0.889079	0.175526	5.06523	4.07902e-07	2.44468e-05	4.61178
ENSMUSG00000022656	1552.65	-0.683082	0.0737618	-9.26066	2.03179e-20	5.48287e-18	17.261
ENSMUSG00000022748	256.262	0.324843	0.105146	3.08946	0.00200524	0.038	1.42022
ENSMUSG00000022817	3147.91	0.276118	0.0638874	4.32195	1.54657e-05	0.000646927	3.18914
ENSMUSG00000022831	96.6691	0.953313	0.150803	6.32158	2.58899e-10	2.61595e-08	7.58237
ENSMUSG00000022833	389.255	0.392828	0.128251	3.06296	0.00219158	0.0401783	1.39601
ENSMUSG00000022837	1491.74	0.222784	0.0743957	2.99458	0.00274827	0.0477344	1.32117
ENSMUSG00000022838	48.912	0.768406	0.220067	3.49169	0.00047998	0.01251	1.90274
ENSMUSG00000022876	45.1609	1.37132	0.245972	5.57508	2.47417e-08	1.85588e-06	5.73145
ENSMUSG00000022883	2245.56	0.388251	0.110234	3.52205	0.000428217	0.0114301	1.94195
ENSMUSG00000022894	193.358	-0.603331	0.160297	-3.76384	0.000167322	0.00522952	2.28154
ENSMUSG00000022895	2779.36	-0.436606	0.0634944	-6.87629	6.14302e-12	7.55182e-10	9.12195
ENSMUSG00000022901	58.9891	1.19442	0.207167	5.76549	8.14189e-09	6.79863e-07	6.16758
ENSMUSG00000022906	393.91	1.3663	0.135134	10.1107	4.95304e-24	1.63583e-21	20.7863
ENSMUSG00000022912	597.831	0.622128	0.116547	5.33802	9.39686e-08	6.45264e-06	5.19026
ENSMUSG00000022935	1379.34	-0.23752	0.0751711	-3.15972	0.00157919	0.0319709	1.49524
ENSMUSG00000022952	69.5792	0.867719	0.22781	3.80896	0.000139554	0.00454124	2.34283
ENSMUSG00000022969	163.993	0.49775	0.153776	3.23684	0.0012086	0.0260917	1.5835
ENSMUSG00000022971	408.201	0.256389	0.0853835	3.0028	0.00267512	0.0467946	1.3298
ENSMUSG00000022987	Zfp641
ENSMUSG00000023066	1320.8	0.253485	0.0653915	3.87643	0.000106	0.00360303	2.44333
ENSMUSG00000023159	32.542	0.877809	0.272725	3.21866	0.00128792	0.0273767	1.56262
ENSMUSG00000023165	Ssxb2
ENSMUSG00000023186	1013.01	0.483611	0.10977	4.40568	1.05453e-05	0.000461157	3.33615
ENSMUSG00000023224	699.546	0.894745	0.0836236	10.6997	1.0214e-26	3.89681e-24	23.4093
ENSMUSG00000023232	543.771	-0.515192	0.146966	-3.50553	0.000455701	0.0120045	1.92066
ENSMUSG00000023249	334.511	0.610639	0.0879964	6.93937	3.93848e-12	4.98004e-10	9.30277
ENSMUSG00000023284	Zfp605
ENSMUSG00000023341	102.643	1.61912	0.208368	7.7705	7.81782e-15	1.28143e-12	11.8923
ENSMUSG00000023367	119.26	0.616451	0.168471	3.6591	0.000253104	0.00741813	2.12971
ENSMUSG00000023495	4128.02	-0.205707	0.0565383	-3.63837	0.000274373	0.00795718	2.09924
ENSMUSG00000023882	Zfp54
ENSMUSG00000023892	Zfp51
ENSMUSG00000023905	426.204	-0.860207	0.127026	-6.7719	1.27101e-11	1.4725e-09	8.83194
ENSMUSG00000023927	1140.14	-0.304067	0.0781108	-3.89276	9.91093e-05	0.00341072	2.46715
ENSMUSG00000023992	268.951	1.95906	0.111971	17.4962	1.53248e-68	5.65178e-65	64.2478
ENSMUSG00000024013	57.2315	0.793378	0.190484	4.16506	3.11267e-05	0.00121049	2.91704
ENSMUSG00000024079	715.291	1.05302	0.103548	10.1694	2.71482e-24	9.24209e-22	21.0342
ENSMUSG00000024087	253.433	0.574775	0.182192	3.15478	0.00160617	0.0324144	1.48926
ENSMUSG00000024164	254.249	3.27737	0.478384	6.85092	7.33746e-12	8.87231e-10	9.05196
ENSMUSG00000024246	305.196	0.328413	0.0987638	3.32524	0.000883439	0.0205344	1.68752
ENSMUSG00000024298	Zfp871
ENSMUSG00000024300	126.098	1.3015	0.139847	9.30657	1.3203e-20	3.65195e-18	17.4375
ENSMUSG00000024308	961.894	0.533231	0.0921761	5.78492	7.25486e-09	6.12731e-07	6.21273
ENSMUSG00000024331	31.78	-2.18166	0.414327	-5.26555	1.39771e-07	9.26001e-06	5.03339
ENSMUSG00000024338	137.144	1.62756	0.208875	7.79203	6.5939e-15	1.08888e-12	11.963
ENSMUSG00000024339	406.609	1.16641	0.134807	8.65245	5.04064e-18	1.1741e-15	14.9303
ENSMUSG00000024349	63.3517	0.623893	0.190764	3.27049	0.0010736	0.0239242	1.62116
ENSMUSG00000024397	77.0902	1.33208	0.182273	7.30812	2.70903e-13	3.81819e-11	10.4181
ENSMUSG00000024403	3689.22	-0.363816	0.100599	-3.61651	0.000298599	0.00850374	2.07039
ENSMUSG00000024440	37.9249	-1.25214	0.270423	-4.63033	3.65089e-06	0.000177554	3.75067
ENSMUSG00000024462	26211.3	-0.238291	0.0474649	-5.02036	5.15756e-07	3.01125e-05	4.52125
ENSMUSG00000024486	951.41	-0.334234	0.0860036	-3.88628	0.000101793	0.00349567	2.45647
ENSMUSG00000024579	660.668	-0.320324	0.107023	-2.99304	0.00276218	0.0479008	1.31966
ENSMUSG00000024610	89.403	1.04011	0.196352	5.29719	1.17597e-07	7.8616e-06	5.10449
ENSMUSG00000024621	1722.38	0.473303	0.0943471	5.01662	5.25888e-07	3.06233e-05	4.51395
ENSMUSG00000024642	1993.55	0.219549	0.0599814	3.66029	0.000251931	0.00740335	2.13057
ENSMUSG00000024665	3169.08	-0.285349	0.0948432	-3.00864	0.0026242	0.0462696	1.3347
ENSMUSG00000024672	22.299	1.30177	0.322649	4.03462	5.46901e-05	0.00202711	2.69312
ENSMUSG00000024675	5.63361	2.69258	0.758834	3.54832	0.0003877	0.0105668	1.97606
ENSMUSG00000024677	46.091	0.831226	0.243399	3.41507	0.000637657	0.0156953	1.80423
ENSMUSG00000024679	37.5464	1.80781	0.285508	6.33192	2.42124e-10	2.45767e-08	7.60948
ENSMUSG00000024691	92.8772	0.782407	0.22183	3.52706	0.000420205	0.011298	1.947
ENSMUSG00000024736	7554.82	-0.396894	0.118114	-3.36026	0.000778697	0.0185679	1.73124
ENSMUSG00000024737	47.5613	1.29352	0.246246	5.25294	1.49689e-07	9.77087e-06	5.01007
ENSMUSG00000024789	3522.81	0.220494	0.0630761	3.49569	0.000472844	0.0123677	1.90771
ENSMUSG00000024846	178.155	0.493426	0.109321	4.51355	6.37499e-06	0.000294501	3.53091
ENSMUSG00000024899	314.563	-0.485208	0.104361	-4.64934	3.33006e-06	0.000164481	3.78388
ENSMUSG00000024965	97.5292	0.787484	0.174157	4.52168	6.13509e-06	0.000285805	3.54393
ENSMUSG00000025013	79.3821	-0.509601	0.166621	-3.05845	0.00222482	0.040754	1.38983
ENSMUSG00000025017	107.754	0.86187	0.152788	5.64097	1.69099e-08	1.32689e-06	5.87716
ENSMUSG00000025058	17.8118	1.20065	0.337334	3.55924	0.000371934	0.0101858	1.992
ENSMUSG00000025104	8159.65	0.250339	0.0722498	3.46492	0.000530395	0.013537	1.86848
ENSMUSG00000025154	245.972	0.308842	0.102164	3.02299	0.0025029	0.0447008	1.34968
ENSMUSG00000025192	601.849	-0.323603	0.105552	-3.06582	0.00217075	0.0399362	1.39863
ENSMUSG00000025202	511.58	-0.269687	0.0878411	-3.07017	0.00213939	0.0394833	1.40359
ENSMUSG00000025203	47065.8	-0.225892	0.0730918	-3.09053	0.00199801	0.0379502	1.42079
ENSMUSG00000025213	256.05	0.406581	0.131004	3.10357	0.00191201	0.0368113	1.43402
ENSMUSG00000025232	1725.08	0.289216	0.0940654	3.07462	0.00210769	0.0391923	1.4068
ENSMUSG00000025270	19.6592	2.1222	0.66389	3.19661	0.00139052	0.0290004	1.5376
ENSMUSG00000025290	10003.6	0.276475	0.0842416	3.28193	0.00103099	0.0231143	1.63612
ENSMUSG00000025323	6025.6	0.209326	0.0665346	3.14613	0.00165448	0.0331644	1.47933
ENSMUSG00000025352	1072.62	-0.419341	0.0832202	-5.03894	4.68116e-07	2.76226e-05	4.55874
ENSMUSG00000025355	43.5856	1.24114	0.265117	4.68147	2.84826e-06	0.000144225	3.84096
ENSMUSG00000025402	1206.51	-0.501787	0.0860692	-5.83004	5.54134e-09	4.75266e-07	6.32306
ENSMUSG00000025478	3223.2	-0.413206	0.136623	-3.02442	0.00249111	0.0446343	1.35033
ENSMUSG00000025492	259.925	0.851244	0.161857	5.25924	1.44648e-07	9.49785e-06	5.02237
ENSMUSG00000025498	168.402	2.21792	0.205901	10.7718	4.67822e-27	1.81614e-24	23.7409
ENSMUSG00000025533	447.002	0.594038	0.107486	5.52665	3.26406e-08	2.39574e-06	5.62056
ENSMUSG00000025534	400.761	0.449458	0.099069	4.53682	5.71088e-06	0.000268873	3.57045
ENSMUSG00000025578	442.695	-0.649425	0.119757	-5.42284	5.86596e-08	4.16032e-06	5.38087
ENSMUSG00000025602	Zfp202
ENSMUSG00000025647	1115.78	0.353903	0.0815349	4.34051	1.4215e-05	0.000600286	3.22164
ENSMUSG00000025747	237.068	0.423321	0.122409	3.45825	0.000543693	0.0138127	1.85972
ENSMUSG00000025762	982.388	-0.221475	0.0669324	-3.30894	0.000936502	0.0215191	1.66718
ENSMUSG00000025764	4168.27	0.270298	0.057055	4.73749	2.16379e-06	0.000112132	3.95027
ENSMUSG00000025812	1650.68	0.251516	0.0828713	3.03503	0.00240516	0.043446	1.36205
ENSMUSG00000025815	286.684	0.446889	0.141661	3.15464	0.00160695	0.0324144	1.48926
ENSMUSG00000025821	Zfp282
ENSMUSG00000025877	39.0423	0.885712	0.232439	3.81052	0.000138677	0.00452602	2.34428
ENSMUSG00000025887	372.607	1.19325	0.139906	8.52896	1.47667e-17	3.33425e-15	14.477
ENSMUSG00000025888	152.456	1.73182	0.15582	11.1142	1.06958e-28	4.64071e-26	25.3334
ENSMUSG00000025889	965.287	-0.964333	0.140258	-6.87543	6.18028e-12	7.55565e-10	9.12173
ENSMUSG00000025912	1098.56	0.398547	0.0877295	4.54291	5.54827e-06	0.000261774	3.58207
ENSMUSG00000025937	1093.69	0.206456	0.0655094	3.15155	0.00162408	0.0326705	1.48584
ENSMUSG00000025938	213.27	-0.373907	0.112278	-3.3302	0.000867849	0.0202145	1.69434
ENSMUSG00000025964	13628.6	-0.221201	0.0698607	-3.16631	0.00154385	0.0313703	1.50348
ENSMUSG00000026028	6978.83	-0.234303	0.0731236	-3.20421	0.00135435	0.0284337	1.54617
ENSMUSG00000026043	326.284	-0.63274	0.180004	-3.51514	0.000439527	0.0116757	1.93272
ENSMUSG00000026090	1286.52	0.538891	0.0805843	6.6873	2.27324e-11	2.56644e-09	8.59067
ENSMUSG00000026094	3930.37	-0.375013	0.111953	-3.34975	0.000808852	0.0191221	1.71846
ENSMUSG00000026104	1074.63	0.851026	0.0862089	9.87168	5.52324e-23	1.77128e-20	19.7517
ENSMUSG00000026109	2847.51	-0.164478	0.0506782	-3.24555	0.00117224	0.0255812	1.59208
ENSMUSG00000026175	37.8779	1.12206	0.229058	4.89858	9.6532e-07	5.3805e-05	4.26918
ENSMUSG00000026177	68.9839	1.66499	0.194242	8.57173	1.0194e-17	2.3255e-15	14.6335
ENSMUSG00000026192	1089.77	0.327888	0.0765745	4.28195	1.85266e-05	0.000759178	3.11966
ENSMUSG00000026202	11157.5	-0.272286	0.0876516	-3.10646	0.00189345	0.0366656	1.43574
ENSMUSG00000026220	201.982	-0.530177	0.115946	-4.57261	4.81683e-06	0.000230209	3.63788
ENSMUSG00000026222	185.482	0.694893	0.12497	5.56048	2.69026e-08	2.01115e-06	5.69656
ENSMUSG00000026223	13274.6	0.296915	0.0989509	3.00063	0.0026942	0.0469798	1.32809
ENSMUSG00000026227	333.475	0.379379	0.0961407	3.94608	7.94404e-05	0.00280808	2.55159
ENSMUSG00000026283	840.24	0.290766	0.0816841	3.55965	0.000371356	0.0101826	1.99214
ENSMUSG00000026285	11.1487	4.05526	0.687614	5.89758	3.68878e-09	3.27812e-07	6.48437
ENSMUSG00000026288	253.458	0.603567	0.1163	5.18976	2.10563e-07	1.33124e-05	4.87574
ENSMUSG00000026295	21.387	3.44398	0.433151	7.95099	1.85028e-15	3.22385e-13	12.4916
ENSMUSG00000026305	1608.03	-0.24394	0.0625816	-3.89795	9.70124e-05	0.0033542	2.47441
ENSMUSG00000026315	109.174	-0.679724	0.209604	-3.24289	0.00118323	0.0257702	1.58888
ENSMUSG00000026355	347.677	0.838236	0.0877259	9.55518	1.23372e-21	3.68914e-19	18.4331
ENSMUSG00000026358	12.2039	3.55918	0.602298	5.90933	3.43498e-09	3.06489e-07	6.51359
ENSMUSG00000026365	1613.75	0.431054	0.137692	3.13056	0.00174473	0.0344401	1.46294
ENSMUSG00000026380	76.6799	0.955569	0.282095	3.3874	0.000705576	0.0170431	1.76845
ENSMUSG00000026395	292.831	1.42674	0.106121	13.4445	3.31566e-41	2.93475e-38	37.5324
ENSMUSG00000026463	2171.99	-0.439262	0.133685	-3.2858	0.00101693	0.0228685	1.64076
ENSMUSG00000026471	308.938	0.481709	0.146027	3.29876	0.000971137	0.0220856	1.65589
ENSMUSG00000026475	458.893	0.438508	0.126131	3.4766	0.000507814	0.0130207	1.88536
ENSMUSG00000026480	121.03	0.686238	0.147738	4.64495	3.40156e-06	0.000166895	3.77756
ENSMUSG00000026536	17.6413	3.55403	0.521992	6.80859	9.85599e-12	1.17255e-09	8.93087
ENSMUSG00000026548	31.485	1.98339	0.284836	6.96328	3.32431e-12	4.22761e-10	9.37391
ENSMUSG00000026558	1554.49	-0.21437	0.0664513	-3.22597	0.00125547	0.0268935	1.57035
ENSMUSG00000026628	59.2525	0.792484	0.190564	4.15862	3.2017e-05	0.00123859	2.90707
ENSMUSG00000026638	69.9292	0.749362	0.191475	3.91362	9.09241e-05	0.00316845	2.49915
ENSMUSG00000026656	101.596	1.6275	0.176647	9.21331	3.16226e-20	8.3303e-18	17.0793
ENSMUSG00000026668	233.852	0.463356	0.149599	3.09731	0.00195283	0.0374132	1.42698
ENSMUSG00000026674	808.208	0.460602	0.0833465	5.52635	3.26968e-08	2.39574e-06	5.62056
ENSMUSG00000026676	286.6	0.850479	0.137911	6.16686	6.96591e-10	6.61552e-08	7.17944
ENSMUSG00000026726	66.0418	0.697162	0.225683	3.08912	0.0020075	0.038	1.42022
ENSMUSG00000026728	5014.82	0.248333	0.0799429	3.10638	0.00189392	0.0366656	1.43574
ENSMUSG00000026875	162.598	-0.625982	0.201478	-3.10695	0.00189029	0.0366593	1.43582
ENSMUSG00000026896	512.397	1.18906	0.10658	11.1565	6.65913e-29	2.94707e-26	25.5306
ENSMUSG00000026946	283.776	0.685363	0.104491	6.55904	5.41556e-11	5.90323e-09	8.22891
ENSMUSG00000026956	449.03	0.452355	0.0973223	4.64801	3.35157e-06	0.000165175	3.78206
ENSMUSG00000027004	89.8019	-0.611083	0.190904	-3.20099	0.00136957	0.0286677	1.54261
ENSMUSG00000027009	227.606	-0.369776	0.105332	-3.51056	0.000447167	0.0118502	1.92627
ENSMUSG00000027011	3653.01	-0.202068	0.0666062	-3.03376	0.00241524	0.0435924	1.36059
ENSMUSG00000027074	38.2612	0.692185	0.230356	3.00485	0.00265708	0.0465526	1.33206
ENSMUSG00000027078	131.277	0.962352	0.143676	6.69808	2.11177e-11	2.39637e-09	8.62045
ENSMUSG00000027087	4861.84	0.370894	0.0754733	4.91424	8.91255e-07	5.00551e-05	4.30055
ENSMUSG00000027188	195.959	0.638726	0.1867	3.42114	0.000623598	0.0154142	1.81208
ENSMUSG00000027227	720.288	0.415222	0.101001	4.11105	3.93868e-05	0.00149751	2.82463
ENSMUSG00000027230	29.323	-0.922279	0.290277	-3.17724	0.00148683	0.0304861	1.5159
ENSMUSG00000027296	1253	-0.30062	0.0858758	-3.50064	0.000464149	0.0121547	1.91526
ENSMUSG00000027322	52.0425	1.48521	0.270041	5.49992	3.79964e-08	2.73871e-06	5.56245
ENSMUSG00000027375	6009.69	-0.397456	0.0931613	-4.26632	1.98726e-05	0.000802447	3.09558
ENSMUSG00000027376	185.883	0.570851	0.176249	3.2389	0.00119993	0.0260059	1.58493
ENSMUSG00000027399	18.2308	1.21604	0.337709	3.60086	0.00031717	0.00895197	2.04808
ENSMUSG00000027489	440.999	-1.3285	0.16079	-8.26229	1.42898e-16	2.79827e-14	13.5531
ENSMUSG00000027514	32.7209	2.46888	0.360735	6.84402	7.70035e-12	9.26051e-10	9.03336
ENSMUSG00000027555	320.896	0.462237	0.134989	3.42424	0.000616512	0.0153045	1.81518
ENSMUSG00000027624	16742.7	-0.310688	0.102319	-3.03646	0.00239372	0.0432747	1.36377
ENSMUSG00000027663	2577.18	-0.38155	0.106946	-3.56769	0.000360139	0.00992423	2.0033
ENSMUSG00000027669	1422.09	-0.322232	0.0734943	-4.38445	1.16281e-05	0.000502551	3.29882
ENSMUSG00000027750	50.7085	0.940014	0.252501	3.72281	0.000197019	0.0059721	2.22387
ENSMUSG00000027848	512.141	0.33123	0.105283	3.1461	0.00165463	0.0331644	1.47933
ENSMUSG00000027849	520.849	0.471004	0.153658	3.06527	0.00217476	0.0399362	1.39863
ENSMUSG00000027858	4380.38	-0.331348	0.0706224	-4.69183	2.70778e-06	0.000137742	3.86093
ENSMUSG00000027884	1507.6	0.210251	0.0689919	3.04747	0.00230774	0.0418914	1.37788
ENSMUSG00000027950	4728.19	-0.325017	0.0520635	-6.24271	4.30061e-10	4.22951e-08	7.37371
ENSMUSG00000027955	152.429	-0.709373	0.148185	-4.78707	1.69236e-06	8.89516e-05	4.05085
ENSMUSG00000027956	584.281	0.36679	0.111108	3.30119	0.000962766	0.021963	1.65831
ENSMUSG00000027995	99.1135	1.76894	0.156047	11.336	8.70474e-30	4.28041e-27	26.3685
ENSMUSG00000028028	161.235	0.512291	0.128481	3.98731	6.68279e-05	0.00242819	2.61472
ENSMUSG00000028037	93.9416	1.64542	0.222087	7.40888	1.27369e-13	1.86651e-11	10.729
ENSMUSG00000028042	1133.1	-0.239709	0.0735032	-3.26121	0.00110939	0.0245065	1.61072
ENSMUSG00000028145	1311.41	-0.436812	0.100996	-4.32504	1.52505e-05	0.000640347	3.19358
ENSMUSG00000028150	1218.5	0.538862	0.0997689	5.4011	6.62352e-08	4.66768e-06	5.3309
ENSMUSG00000028159	40.0021	0.939407	0.243665	3.85532	0.000115581	0.00385757	2.41369
ENSMUSG00000028167	62.2836	0.815096	0.215406	3.784	0.000154326	0.0049065	2.30923
ENSMUSG00000028194	2659.34	-0.265002	0.0822358	-3.22247	0.0012709	0.027093	1.56714
ENSMUSG00000028226	2022.74	-0.289935	0.0725958	-3.99382	6.50164e-05	0.00237407	2.62451
ENSMUSG00000028238	10.7642	4.25084	0.74805	5.68256	1.3269e-08	1.06383e-06	5.97313
ENSMUSG00000028268	395.433	1.40756	0.127643	11.0273	2.82211e-28	1.20092e-25	24.9205
ENSMUSG00000028270	358.485	1.16867	0.158551	7.37094	1.69427e-13	2.45037e-11	10.6108
ENSMUSG00000028360	392.515	0.867294	0.180811	4.7967	1.61301e-06	8.49828e-05	4.07067
ENSMUSG00000028362	12.8683	2.69734	0.525494	5.13296	2.85224e-07	1.75318e-05	4.75617
ENSMUSG00000028364	1031.91	-1.67781	0.155158	-10.8135	2.97036e-27	1.17372e-24	23.9304
ENSMUSG00000028382	2144.42	0.234192	0.0755407	3.10021	0.00193383	0.0371457	1.43009
ENSMUSG00000028389	Zfp37
ENSMUSG00000028391	132.589	0.45314	0.132782	3.41265	0.000643334	0.0157999	1.80135
ENSMUSG00000028459	26.9958	1.93061	0.345111	5.59417	2.21682e-08	1.6857e-06	5.77322
ENSMUSG00000028463	123.416	-0.86063	0.193267	-4.45307	8.46529e-06	0.000379643	3.42062
ENSMUSG00000028542	2524.04	-0.379082	0.0926269	-4.09257	4.26626e-05	0.0016165	2.79142
ENSMUSG00000028559	6069.15	0.19669	0.0518766	3.7915	0.00014974	0.00477442	2.32108
ENSMUSG00000028581	272.49	0.829131	0.189371	4.37833	1.1959e-05	0.000514842	3.28833
ENSMUSG00000028599	97.7199	0.667173	0.143428	4.65163	3.29318e-06	0.000163389	3.78678
ENSMUSG00000028655	355.804	-0.674808	0.192438	-3.50662	0.000453837	0.0119839	1.9214
ENSMUSG00000028755	103.68	1.47693	0.230157	6.41708	1.38917e-10	1.43643e-08	7.84272
ENSMUSG00000028782	1311.83	-0.858534	0.162602	-5.27997	1.29204e-07	8.58566e-06	5.06623
ENSMUSG00000028859	111.106	1.33599	0.184639	7.23567	4.63252e-13	6.40677e-11	10.1934
ENSMUSG00000028861	950.865	0.179777	0.0573855	3.1328	0.00173149	0.0342092	1.46586
ENSMUSG00000028885	49.4772	0.947347	0.253737	3.73359	0.000188772	0.00578553	2.23766
ENSMUSG00000028927	1031.35	0.313414	0.104067	3.01166	0.00259826	0.046029	1.33697
ENSMUSG00000028954	4085.72	0.133942	0.0449125	2.9823	0.00286096	0.0492663	1.30745
ENSMUSG00000028970	102.055	0.627564	0.182058	3.44705	0.000566745	0.0142835	1.84516
ENSMUSG00000028995	587.221	-0.280567	0.0896697	-3.12889	0.00175467	0.0345676	1.46133
ENSMUSG00000029070	483.711	0.412399	0.106351	3.87772	0.000105438	0.00359985	2.44372
ENSMUSG00000029084	685.209	-0.295601	0.0879498	-3.36103	0.000776538	0.0185426	1.73183
ENSMUSG00000029120	12217.8	-0.28167	0.0821391	-3.42918	0.00060541	0.0151032	1.82093
ENSMUSG00000029185	184.332	0.387245	0.126315	3.06571	0.00217153	0.0399362	1.39863
ENSMUSG00000029191	2825.5	0.188057	0.0612153	3.07206	0.00212588	0.0393652	1.40489
ENSMUSG00000029204	24.2688	0.961729	0.28768	3.34305	0.000828631	0.0195271	1.70936
ENSMUSG00000029298	417.072	1.06207	0.134653	7.88746	3.0841e-15	5.2903e-13	12.2765
ENSMUSG00000029311	935.799	0.641265	0.124849	5.13631	2.80183e-07	1.73181e-05	4.7615
ENSMUSG00000029428	470.228	0.286589	0.0777125	3.68781	0.000226196	0.00672751	2.17215
ENSMUSG00000029455	1873.34	0.303053	0.082043	3.69383	0.0002209	0.0066055	2.18009
ENSMUSG00000029468	430.715	0.367351	0.0907678	4.04715	5.18457e-05	0.00193464	2.7134
ENSMUSG00000029470	1100.01	0.252916	0.0726344	3.48204	0.000497612	0.0128646	1.89061
ENSMUSG00000029471	8576.65	-0.3372	0.096687	-3.48754	0.000487486	0.0126609	1.89754
ENSMUSG00000029478	2091.86	-0.458899	0.126187	-3.63665	0.000276206	0.00799985	2.09692
ENSMUSG00000029484	369.569	0.521859	0.103516	5.04133	4.62301e-07	2.73524e-05	4.563
ENSMUSG00000029550	1600.46	-0.19481	0.0564597	-3.45043	0.000559691	0.0141703	1.84862
ENSMUSG00000029561	366.137	2.40086	0.164932	14.5567	5.29622e-48	6.89381e-45	44.1615
ENSMUSG00000029587	Zfp12
ENSMUSG00000029602	201.218	-1.09358	0.260892	-4.19168	2.76894e-05	0.00108253	2.96556
ENSMUSG00000029605	68.7355	2.79019	0.224701	12.4174	2.10383e-35	1.41071e-32	31.8506
ENSMUSG00000029622	349.148	0.508883	0.13774	3.69451	0.000220312	0.00659684	2.18066
ENSMUSG00000029627	Zkscan14
ENSMUSG00000029636	3372.92	-0.342265	0.103463	-3.3081	0.000939311	0.0215613	1.66633
ENSMUSG00000029661	1025	-0.572836	0.0753149	-7.60588	2.82975e-14	4.47262e-12	11.3494
ENSMUSG00000029729	Zkscan1
ENSMUSG00000029759	116.23	0.708518	0.223742	3.16668	0.00154189	0.0313594	1.50363
ENSMUSG00000029762	41.4957	1.25337	0.242645	5.16542	2.39894e-07	1.49954e-05	4.82404
ENSMUSG00000029771	78.8741	0.789967	0.161035	4.90555	9.31659e-07	5.206e-05	4.2835
ENSMUSG00000029798	198.322	1.07407	0.146899	7.3116	2.63983e-13	3.76865e-11	10.4238
ENSMUSG00000029816	341.935	2.64671	0.150318	17.6074	2.16201e-69	9.5682e-66	65.0192
ENSMUSG00000029826	1229.37	1.47596	0.0985998	14.9692	1.16629e-50	1.72051e-47	46.7643
ENSMUSG00000029843	609.214	0.643849	0.162362	3.96553	7.32344e-05	0.00262402	2.58103
ENSMUSG00000029915	61.4905	1.44276	0.190547	7.57168	3.68417e-14	5.74107e-12	11.241
ENSMUSG00000029919	176.724	0.817108	0.116058	7.04052	1.9153e-12	2.52273e-10	9.59813
ENSMUSG00000029925	103.905	0.555598	0.167688	3.31329	0.000922063	0.0212757	1.67212
ENSMUSG00000029994	250.253	0.606237	0.123914	4.89239	9.96173e-07	5.51083e-05	4.25878
ENSMUSG00000030047	74.0296	1.09078	0.195145	5.58957	2.27629e-08	1.72499e-06	5.76321
ENSMUSG00000030093	1869.45	-0.28529	0.094279	-3.02602	0.002478	0.0444682	1.35195
ENSMUSG00000030094	1085	0.243994	0.0645891	3.77764	0.000158321	0.0049905	2.30186
ENSMUSG00000030107	161.603	2.71066	0.225976	11.9954	3.75713e-33	2.13174e-30	29.6713
ENSMUSG00000030123	1403.74	0.472109	0.132581	3.5609	0.000369583	0.0101573	1.99322
ENSMUSG00000030124	58.5809	0.859984	0.191655	4.48714	7.21862e-06	0.000331397	3.47965
ENSMUSG00000030145	Zfp248
ENSMUSG00000030172	14721.4	-0.308963	0.0896817	-3.44511	0.00057083	0.0143538	1.84303
ENSMUSG00000030218	410.535	0.667538	0.199895	3.33944	0.000839484	0.0196781	1.70602
ENSMUSG00000030220	119.053	0.450167	0.14916	3.01802	0.00254431	0.0452576	1.34431
ENSMUSG00000030263	28.3029	0.942954	0.266235	3.54181	0.000397385	0.0107761	1.96754
ENSMUSG00000030283	4052.2	-0.218045	0.0676077	-3.22515	0.00125906	0.0269445	1.56953
ENSMUSG00000030341	177.54	0.585857	0.151948	3.85564	0.000115425	0.00385757	2.41369
ENSMUSG00000030376	3042.4	-0.603326	0.129	-4.67693	2.91196e-06	0.000147114	3.83235
ENSMUSG00000030386	Zfp606
ENSMUSG00000030393	Zik1
ENSMUSG00000030411	693.604	-0.45705	0.151151	-3.0238	0.00249622	0.0446617	1.35006
ENSMUSG00000030443	Zfp583
ENSMUSG00000030446	Zfp273
ENSMUSG00000030469	Zfp719
ENSMUSG00000030486	Zfp108
ENSMUSG00000030494	554.419	0.396086	0.127629	3.1034	0.0019131	0.0368113	1.43402
ENSMUSG00000030495	909.337	-0.475388	0.107795	-4.41012	1.03315e-05	0.000453325	3.34359
ENSMUSG00000030560	363.794	0.537827	0.122263	4.39893	1.08784e-05	0.00047407	3.32416
ENSMUSG00000030577	32.9144	3.71856	0.408224	9.10911	8.30584e-20	2.16225e-17	16.6651
ENSMUSG00000030579	349.889	1.71825	0.122982	13.9716	2.3239e-44	2.70649e-41	40.5676
ENSMUSG00000030604	Zfp626
ENSMUSG00000030674	61.1936	1.18363	0.222163	5.32776	9.94293e-08	6.74899e-06	5.17076
ENSMUSG00000030678	2381.27	-0.332502	0.107716	-3.08685	0.00202293	0.0380716	1.4194
ENSMUSG00000030717	219.542	0.526599	0.124073	4.24426	2.19315e-05	0.000874416	3.05828
ENSMUSG00000030745	27.7866	1.00872	0.301352	3.34733	0.000815946	0.0192487	1.7156
ENSMUSG00000030757	Zkscan2
ENSMUSG00000030786	104.128	0.833022	0.186288	4.4717	7.76012e-06	0.00035246	3.45289
ENSMUSG00000030789	84.9682	4.83977	0.330638	14.6377	1.61475e-48	2.23319e-45	44.6511
ENSMUSG00000030793	77.0499	0.97522	0.160431	6.07874	1.21129e-09	1.10758e-07	6.95563
ENSMUSG00000030798	34.0395	1.40821	0.255144	5.51927	3.40414e-08	2.46973e-06	5.60735
ENSMUSG00000030806	13533.7	-0.348045	0.108715	-3.20143	0.00136746	0.0286545	1.54281
ENSMUSG00000030823	9130019O22Rik
ENSMUSG00000030905	12.3852	3.15472	0.860303	3.66699	0.000245422	0.00724093	2.14021
ENSMUSG00000030921	301.361	1.82619	0.148515	12.2964	9.47077e-35	6.1638e-32	31.2102
ENSMUSG00000030930	2255.99	-0.362426	0.070371	-5.15022	2.60176e-07	1.61265e-05	4.79246
ENSMUSG00000030966	154.577	0.873949	0.189466	4.6127	3.97478e-06	0.000192039	3.71661
ENSMUSG00000031065	8702.62	-0.266492	0.0630877	-4.22416	2.39835e-05	0.000946	3.02411
ENSMUSG00000031079	Zfp300
ENSMUSG00000031101	35.9639	1.05429	0.257641	4.0921	4.27482e-05	0.00161698	2.7913
ENSMUSG00000031109	929.818	0.356528	0.11852	3.00817	0.00262829	0.046278	1.33463
ENSMUSG00000031170	84.1456	-0.854349	0.265863	-3.21349	0.00131132	0.0277407	1.55688
ENSMUSG00000031189	621.8	-0.480436	0.09836	-4.88447	1.0371e-06	5.70868e-05	4.24346
ENSMUSG00000031221	2031.05	0.212348	0.0646921	3.28244	0.00102914	0.0230962	1.63646
ENSMUSG00000031239	726.609	-0.446819	0.144639	-3.0892	0.00200694	0.038	1.42022
ENSMUSG00000031264	25.7439	1.12217	0.274661	4.08567	4.39507e-05	0.0016568	2.78073
ENSMUSG00000031297	277.403	-0.371102	0.11983	-3.09691	0.00195547	0.0374314	1.42676
ENSMUSG00000031351	44.726	0.926302	0.284789	3.2526	0.00114356	0.0251039	1.60026
ENSMUSG00000031425	50318	-0.498958	0.101964	-4.89348	9.90673e-07	5.49414e-05	4.2601
ENSMUSG00000031467	3999.29	-0.182269	0.0582604	-3.12852	0.0017569	0.0345676	1.46133
ENSMUSG00000031502	946.666	-0.532115	0.176967	-3.00685	0.00263967	0.0463209	1.33422
ENSMUSG00000031504	19.429	1.66622	0.376832	4.42164	9.79547e-06	0.000434377	3.36213
ENSMUSG00000031508	2548.68	0.189426	0.0602567	3.14365	0.00166854	0.0333527	1.47687
ENSMUSG00000031520	122.21	-0.626715	0.162335	-3.86064	0.000113092	0.00380898	2.41919
ENSMUSG00000031583	1106.07	0.250482	0.0559062	4.4804	7.45023e-06	0.000340617	3.46773
ENSMUSG00000031618	3367.39	0.570976	0.0729669	7.82514	5.07097e-15	8.63157e-13	12.0639
ENSMUSG00000031620	16.087	2.27719	0.72299	3.14969	0.00163445	0.0328493	1.48347
ENSMUSG00000031636	54.7112	-1.15348	0.223055	-5.1713	2.32474e-07	1.45728e-05	4.83646
ENSMUSG00000031639	642.899	0.361963	0.102826	3.52015	0.000431296	0.0114985	1.93936
ENSMUSG00000031662	27.1097	0.791287	0.262984	3.00888	0.00262213	0.0462696	1.3347
ENSMUSG00000031681	1822.49	-0.213474	0.0610819	-3.49488	0.000474282	0.0123907	1.9069
ENSMUSG00000031755	1311.1	0.229099	0.0594978	3.85055	0.000117852	0.00392154	2.40654
ENSMUSG00000031758	754.726	-0.336507	0.105373	-3.19349	0.00140562	0.0292327	1.53413
ENSMUSG00000031772	6680.77	0.238898	0.0793829	3.00944	0.00261734	0.0462222	1.33515
ENSMUSG00000031790	226.165	-0.5778	0.190612	-3.03129	0.00243509	0.0438792	1.35774
ENSMUSG00000031824	13679.3	-0.188849	0.0623925	-3.02679	0.00247165	0.0443934	1.35268
ENSMUSG00000031849	94.249	0.965894	0.206706	4.67279	2.97138e-06	0.000149774	3.82456
ENSMUSG00000031897	421.194	0.44322	0.108882	4.07065	4.68821e-05	0.00175832	2.7549
ENSMUSG00000031907	Zfp90
ENSMUSG00000031934	84.5473	-0.884907	0.290116	-3.05018	0.00228702	0.0416863	1.38001
ENSMUSG00000031970	531.779	-0.290075	0.0937185	-3.09517	0.00196698	0.0374657	1.42637
ENSMUSG00000032036	3762	-0.303408	0.101603	-2.98622	0.00282452	0.0487527	1.312
ENSMUSG00000032041	196.053	0.675878	0.117502	5.75207	8.81579e-09	7.33368e-07	6.13468
ENSMUSG00000032062	79.5251	0.569764	0.17596	3.23803	0.00120357	0.0260436	1.5843
ENSMUSG00000032092	91.1281	0.96229	0.200347	4.80311	1.56217e-06	8.26979e-05	4.08251
ENSMUSG00000032101	2384.71	0.317593	0.0831262	3.82061	0.000133121	0.00436401	2.36011
ENSMUSG00000032122	149.467	0.559805	0.159508	3.50957	0.000448828	0.01188	1.92518
ENSMUSG00000032265	156.244	0.440406	0.137594	3.20076	0.00137068	0.0286677	1.54261
ENSMUSG00000032280	1853.69	-0.521407	0.145841	-3.57519	0.000349979	0.00971685	2.01247
ENSMUSG00000032359	382.421	0.746348	0.110797	6.73615	1.62636e-11	1.87438e-09	8.72714
ENSMUSG00000032372	165.181	0.625943	0.161802	3.86858	0.000109472	0.00370963	2.43067
ENSMUSG00000032415	549.192	0.454737	0.125422	3.62566	0.000288229	0.00826158	2.08294
ENSMUSG00000032425	Zfp949
ENSMUSG00000032436	202.865	1.00853	0.137536	7.33288	2.25262e-13	3.23675e-11	10.4899
ENSMUSG00000032440	772.653	0.287188	0.0820387	3.50064	0.000464135	0.0121547	1.91526
ENSMUSG00000032548	519.577	0.514448	0.131389	3.91546	9.0231e-05	0.00315612	2.50085
ENSMUSG00000032596	141.252	0.991635	0.23816	4.16373	3.13091e-05	0.00121545	2.91526
ENSMUSG00000032656	319.905	-0.329465	0.0925302	-3.56062	0.000369975	0.0101573	1.99322
ENSMUSG00000032661	12.8011	5.28952	0.902958	5.85799	4.68507e-09	4.09768e-07	6.38746
ENSMUSG00000032690	62.2422	2.13014	0.293387	7.2605	3.85674e-13	5.40139e-11	10.2675
ENSMUSG00000032714	540.683	0.388859	0.0837079	4.64543	3.39363e-06	0.000166876	3.77761
ENSMUSG00000032717	150.684	-0.617074	0.179	-3.44734	0.00056613	0.0142835	1.84516
ENSMUSG00000032854	3971.28	-0.413634	0.117689	-3.51463	0.000440359	0.0116838	1.93242
ENSMUSG00000032890	7344.35	-0.556278	0.108322	-5.13543	2.815e-07	1.73511e-05	4.76067
ENSMUSG00000033053	61.8104	0.907415	0.194562	4.66389	3.10288e-06	0.000154641	3.81068
ENSMUSG00000033102	1831.93	0.282339	0.0657442	4.2945	1.75088e-05	0.000725533	3.13934
ENSMUSG00000033149	922.528	0.500153	0.133473	3.74721	0.000178815	0.00552628	2.25757
ENSMUSG00000033174	2954.07	-0.22219	0.0671397	-3.30937	0.000935067	0.0215085	1.66739
ENSMUSG00000033191	314.118	-0.431614	0.107868	-4.00131	6.29924e-05	0.00230777	2.63681
ENSMUSG00000033192	260.102	0.64851	0.15139	4.28371	1.83802e-05	0.000755321	3.12187
ENSMUSG00000033213	6.61057	1.77773	0.584256	3.04272	0.0023445	0.0424543	1.37208
ENSMUSG00000033214	927.137	-0.331383	0.109672	-3.02157	0.00251464	0.0448177	1.34855
ENSMUSG00000033220	37.3235	0.746141	0.225723	3.30556	0.000947877	0.021668	1.66418
ENSMUSG00000033308	272.15	0.513109	0.145533	3.52572	0.000422333	0.011314	1.94638
ENSMUSG00000033316	1782.51	-0.315609	0.0956445	-3.29982	0.000967483	0.0220252	1.65708
ENSMUSG00000033327	200.28	0.608105	0.189703	3.20557	0.00134795	0.0283262	1.54781
ENSMUSG00000033355	139.298	1.79569	0.201252	8.92255	4.55661e-19	1.13291e-16	15.9458
ENSMUSG00000033361	598.444	-0.47247	0.131924	-3.58139	0.000341771	0.00953684	2.0206
ENSMUSG00000033450	26.705	1.34733	0.298433	4.51466	6.34176e-06	0.000293578	3.53228
ENSMUSG00000033467	147.8	0.502887	0.16171	3.10981	0.00187205	0.0364014	1.43888
ENSMUSG00000033579	586.618	-0.514438	0.149424	-3.4428	0.000575716	0.0144602	1.83983
ENSMUSG00000033594	326.563	-0.582213	0.156796	-3.7132	0.000204658	0.00616146	2.21032
ENSMUSG00000033669	Zfp7
ENSMUSG00000033777	90.3285	1.32214	0.172331	7.67209	1.69216e-14	2.69383e-12	11.5696
ENSMUSG00000033880	727.842	2.1359	0.142653	14.9727	1.10793e-50	1.72051e-47	46.7643
ENSMUSG00000033883	D3Ertd254e
ENSMUSG00000033948	1251.64	-0.179381	0.0552149	-3.24878	0.001159	0.0253422	1.59616
ENSMUSG00000033961	Zfp446
ENSMUSG00000033972	Zfp944
ENSMUSG00000034041	34.3793	0.728502	0.22902	3.18095	0.00146791	0.0301876	1.52017
ENSMUSG00000034071	Zfp551
ENSMUSG00000034115	10.4207	-2.46311	0.639347	-3.85255	0.000116895	0.00389556	2.40943
ENSMUSG00000034116	91.3469	0.828621	0.149128	5.55643	2.75351e-08	2.05151e-06	5.68793
ENSMUSG00000034164	173.359	-0.600426	0.163529	-3.67167	0.000240971	0.00711911	2.14757
ENSMUSG00000034255	505.799	0.439663	0.143427	3.06542	0.00217362	0.0399362	1.39863
ENSMUSG00000034275	8938.01	-0.449955	0.141628	-3.17703	0.00148793	0.0304861	1.5159
ENSMUSG00000034330	169.181	0.736727	0.128127	5.74999	8.92495e-09	7.39668e-07	6.13096
ENSMUSG00000034422	474.291	1.34368	0.119029	11.2887	1.49298e-29	7.02906e-27	26.1531
ENSMUSG00000034429	Zfp707
ENSMUSG00000034459	504.625	2.47724	0.191526	12.9342	2.88609e-38	2.12878e-35	34.6719
ENSMUSG00000034460	359.277	0.960468	0.174875	5.4923	3.96732e-08	2.85029e-06	5.54511
ENSMUSG00000034538	Zfp418
ENSMUSG00000034612	1382.83	-0.259505	0.0829561	-3.12823	0.00175865	0.0345676	1.46133
ENSMUSG00000034732	127.537	-0.478883	0.139857	-3.42408	0.000616879	0.0153045	1.81518
ENSMUSG00000034792	31.9119	0.825192	0.265391	3.10935	0.00187502	0.036427	1.43858
ENSMUSG00000034795	79.9585	0.669354	0.185042	3.61731	0.000297679	0.00848845	2.07117
ENSMUSG00000034800	Zfp661
ENSMUSG00000034855	44.7037	3.06819	0.688695	4.45508	8.38629e-06	0.000377389	3.42321
ENSMUSG00000034957	89.3615	0.53107	0.161418	3.29004	0.00100175	0.022619	1.64553
ENSMUSG00000034993	718.189	0.456292	0.120935	3.77303	0.000161275	0.00506198	2.29568
ENSMUSG00000034998	4256.5	-0.260839	0.0784687	-3.32412	0.00088698	0.0205951	1.68624
ENSMUSG00000035004	33.4606	0.966618	0.276742	3.49284	0.000477906	0.0124706	1.90411
ENSMUSG00000035202	1116.62	-0.839748	0.16576	-5.06606	4.0614e-07	2.44214e-05	4.61223
ENSMUSG00000035208	131.106	2.32315	0.170403	13.6333	2.53821e-42	2.44198e-39	38.6123
ENSMUSG00000035226	3857.17	-0.346431	0.0911703	-3.79982	0.000144799	0.00466392	2.33125
ENSMUSG00000035273	17.3796	1.71763	0.543112	3.16258	0.00156378	0.031717	1.49871
ENSMUSG00000035371	Ssx9
ENSMUSG00000035478	727.682	-0.221231	0.0732198	-3.02147	0.00251553	0.0448177	1.34855
ENSMUSG00000035606	115.015	-0.755462	0.182092	-4.14878	3.34245e-05	0.00128853	2.88991
ENSMUSG00000035637	394.242	0.395598	0.107558	3.67801	0.000235064	0.00696319	2.15719
ENSMUSG00000035692	36.7495	1.71625	0.25739	6.66791	2.59474e-11	2.89982e-09	8.53763
ENSMUSG00000035697	124.731	0.900098	0.182529	4.93126	8.17022e-07	4.63566e-05	4.33389
ENSMUSG00000035764	2629.23	-0.234186	0.0696172	-3.3639	0.000768483	0.0184091	1.73497
ENSMUSG00000035778	126.427	0.573102	0.182256	3.1445	0.00166373	0.0332867	1.47773
ENSMUSG00000035868	3110052M02Rik
ENSMUSG00000035910	250.492	0.434727	0.144413	3.01029	0.00260997	0.0461658	1.33568
ENSMUSG00000035919	2533.68	0.31701	0.0810334	3.91208	9.15031e-05	0.00318362	2.49708
ENSMUSG00000035929	147.702	1.58406	0.205665	7.70215	1.33798e-14	2.16108e-12	11.6653
ENSMUSG00000035948	228.145	0.490651	0.152881	3.20937	0.00133024	0.0280339	1.55232
ENSMUSG00000035992	6962.3	0.208793	0.0672659	3.104	0.00190924	0.0368012	1.43414
ENSMUSG00000036306	516.225	-0.546886	0.16755	-3.26402	0.00109842	0.0243363	1.61375
ENSMUSG00000036334	472.866	-0.584685	0.129821	-4.50377	6.67588e-06	0.000307758	3.51179
ENSMUSG00000036353	553.537	0.372309	0.11082	3.35959	0.000780584	0.0185759	1.73105
ENSMUSG00000036362	228.572	0.74721	0.153226	4.87652	1.07971e-06	5.89923e-05	4.2292
ENSMUSG00000036402	1597.93	-0.276116	0.0699206	-3.949	7.84781e-05	0.00278295	2.55549
ENSMUSG00000036403	1285.24	0.267407	0.0614285	4.35314	1.34199e-05	0.000571067	3.24331
ENSMUSG00000036432	593.984	-0.385033	0.125121	-3.0773	0.00208887	0.0389406	1.4096
ENSMUSG00000036502	2503.04	-0.362026	0.0969285	-3.73498	0.000187729	0.00576954	2.23886
ENSMUSG00000036565	1051.67	-0.507643	0.120058	-4.22829	2.35469e-05	0.000932105	3.03054
ENSMUSG00000036594	78.4366	0.814799	0.271633	2.99963	0.00270304	0.0470597	1.32735
ENSMUSG00000036814	776.554	0.645285	0.161921	3.98518	6.74304e-05	0.00244606	2.61153
ENSMUSG00000036853	6.09533	3.41351	0.970083	3.51878	0.00043353	0.0115388	1.93784
ENSMUSG00000036872	792.846	0.378384	0.0810415	4.66901	3.02648e-06	0.000151859	3.81856
ENSMUSG00000036887	1361.2	1.65304	0.118146	13.9916	1.75524e-44	2.15777e-41	40.666
ENSMUSG00000036896	926.065	1.47397	0.0942474	15.6393	3.92746e-55	7.90063e-52	51.1023
ENSMUSG00000036898	Zfp157
ENSMUSG00000036905	920.203	1.35155	0.0993773	13.6002	3.99266e-42	3.68124e-39	38.434
ENSMUSG00000036908	279.301	0.858242	0.11423	7.51325	5.76752e-14	8.86275e-12	11.0524
ENSMUSG00000037001	Zfp39
ENSMUSG00000037007	Zfp113
ENSMUSG00000037138	1006.04	-0.37793	0.0926892	-4.07739	4.5544e-05	0.00171103	2.76674
ENSMUSG00000037174	7174.01	0.287457	0.0790695	3.6355	0.000277441	0.00800418	2.09668
ENSMUSG00000037217	1621.56	-0.414897	0.117786	-3.52248	0.000427537	0.0114258	1.94211
ENSMUSG00000037225	276.497	0.525715	0.109276	4.81088	1.50264e-06	7.97374e-05	4.09834
ENSMUSG00000037295	1023.26	-0.586436	0.150581	-3.8945	9.84035e-05	0.0033917	2.46958
ENSMUSG00000037321	158.628	1.11204	0.177541	6.26359	3.76202e-10	3.74982e-08	7.42599
ENSMUSG00000037411	15.1988	1.69592	0.486966	3.48263	0.000496506	0.0128646	1.89061
ENSMUSG00000037465	554.458	-0.428965	0.137536	-3.11893	0.00181509	0.0354808	1.45001
ENSMUSG00000037533	4981.25	0.21722	0.0616265	3.52478	0.000423835	0.0113405	1.94537
ENSMUSG00000037625	2410.34	-0.579534	0.0963004	-6.01798	1.76607e-09	1.60821e-07	6.79366
ENSMUSG00000037640	Zfp60
ENSMUSG00000037653	1287.47	-0.325243	0.0710562	-4.57727	4.71085e-06	0.000225631	3.6466
ENSMUSG00000037686	84.7176	1.00676	0.168949	5.95894	2.53876e-09	2.30236e-07	6.63783
ENSMUSG00000037849	14.9644	2.95148	0.459932	6.41723	1.3878e-10	1.43643e-08	7.84272
ENSMUSG00000037860	128.729	0.596358	0.195391	3.05213	0.00227223	0.0415193	1.38175
ENSMUSG00000037868	7.99782	1.66854	0.499412	3.341	0.00083476	0.0196089	1.70755
ENSMUSG00000037921	181.809	1.91453	0.175852	10.8872	1.32723e-27	5.33981e-25	24.2725
ENSMUSG00000037992	402.837	-0.56253	0.131813	-4.26762	1.97565e-05	0.000799219	3.09733
ENSMUSG00000037994	63.4871	1.14129	0.266411	4.28394	1.83612e-05	0.000755321	3.12187
ENSMUSG00000038070	2026.39	0.292964	0.0759512	3.85726	0.000114664	0.0038538	2.41411
ENSMUSG00000038143	5628.99	-0.218706	0.072665	-3.00978	0.00261435	0.0462064	1.3353
ENSMUSG00000038147	181.456	1.8006	0.134889	13.3487	1.20483e-40	1.02541e-37	36.9891
ENSMUSG00000038156	6173.09	0.236848	0.0655002	3.61599	0.000299196	0.00850763	2.07019
ENSMUSG00000038179	14.9667	4.24951	0.624343	6.80637	1.0009e-11	1.18438e-09	8.92651
ENSMUSG00000038213	223.766	0.387065	0.103051	3.75603	0.000172627	0.00535748	2.27104
ENSMUSG00000038264	6335.49	-0.251781	0.081957	-3.07211	0.00212552	0.0393652	1.40489
ENSMUSG00000038375	3346.62	-0.386431	0.0900888	-4.28944	1.79122e-05	0.000739481	3.13107
ENSMUSG00000038393	887.437	0.797998	0.139229	5.73153	9.95284e-09	8.18723e-07	6.08686
ENSMUSG00000038418	456.802	-0.563223	0.132866	-4.23903	2.24485e-05	0.000893333	3.04899
ENSMUSG00000038456	562.105	-0.348685	0.10836	-3.21786	0.00129153	0.027427	1.56182
ENSMUSG00000038507	888.433	0.914608	0.132566	6.89926	5.22743e-12	6.49846e-10	9.18719
ENSMUSG00000038518	4627.32	-0.251619	0.072337	-3.47843	0.000504352	0.0130073	1.88581
ENSMUSG00000038521	39.3721	0.918734	0.281479	3.26396	0.00109867	0.0243363	1.61375
ENSMUSG00000038555	3925.47	-0.387388	0.0820157	-4.72335	2.31996e-06	0.000119665	3.92203
ENSMUSG00000038602	1368.6	-0.344667	0.113051	-3.04877	0.00229779	0.0418481	1.37832
ENSMUSG00000038604	594.175	-0.356632	0.103123	-3.45832	0.000543547	0.0138127	1.85972
ENSMUSG00000038618	60.1694	0.581375	0.192407	3.02159	0.00251453	0.0448177	1.34855
ENSMUSG00000038622	458.892	0.399707	0.110687	3.61115	0.000304845	0.00863713	2.06363
ENSMUSG00000038642	2511.99	1.7206	0.0944166	18.2235	3.35882e-74	1.8581e-70	69.7309
ENSMUSG00000038811	47.5118	0.902758	0.252909	3.5695	0.000357668	0.00988075	2.00521
ENSMUSG00000038844	2194.45	0.33639	0.059787	5.62648	1.83929e-08	1.42806e-06	5.84525
ENSMUSG00000039005	227.455	0.945724	0.192588	4.9106	9.07993e-07	5.0866e-05	4.29357
ENSMUSG00000039013	11.0038	1.50442	0.464231	3.24066	0.00119254	0.0259219	1.58633
ENSMUSG00000039046	2385.96	-0.231486	0.0752007	-3.07824	0.00208224	0.0388825	1.41025
ENSMUSG00000039063	74.1201	0.554084	0.173611	3.19153	0.00141523	0.0293772	1.53199
ENSMUSG00000039232	20.2149	1.28822	0.332239	3.87739	0.000105581	0.00359985	2.44372
ENSMUSG00000039234	372.251	0.298444	0.100125	2.98071	0.00287584	0.0494074	1.30621
ENSMUSG00000039264	6.90176	2.84588	0.720435	3.95023	7.80771e-05	0.00277318	2.55702
ENSMUSG00000039375	690.991	0.360845	0.115975	3.11141	0.00186193	0.0362684	1.44047
ENSMUSG00000039410	280.412	0.437519	0.130178	3.36093	0.000776798	0.0185426	1.73183
ENSMUSG00000039457	159.174	1.09643	0.133853	8.1913	2.58425e-16	4.88754e-14	13.3109
ENSMUSG00000039616	61.3284	0.684805	0.190227	3.59993	0.000318302	0.00897246	2.04709
ENSMUSG00000039634	Zfp189
ENSMUSG00000039765	2999.69	0.292057	0.0857378	3.4064	0.00065825	0.0161126	1.79284
ENSMUSG00000039789	Zfp597
ENSMUSG00000039809	10602.6	-0.336948	0.0810051	-4.15958	3.18828e-05	0.00123556	2.90814
ENSMUSG00000039851	109.367	0.793955	0.143132	5.54703	2.90565e-08	2.15037e-06	5.66749
ENSMUSG00000039853	18.9861	1.42411	0.332638	4.28127	1.85828e-05	0.000760073	3.11914
ENSMUSG00000039891	139.92	0.698516	0.144387	4.83782	1.31272e-06	7.05043e-05	4.15178
ENSMUSG00000039903	167.576	0.910676	0.129243	7.04624	1.8382e-12	2.43567e-10	9.61338
ENSMUSG00000039936	397.748	0.39875	0.119093	3.34822	0.000813321	0.0192072	1.71654
ENSMUSG00000039989	1018.91	-0.459913	0.08653	-5.31506	1.06619e-07	7.2149e-06	5.14177
ENSMUSG00000039997	172.217	0.860235	0.138206	6.22431	4.83668e-10	4.69412e-08	7.32845
ENSMUSG00000040061	48.7125	0.989669	0.213426	4.63706	3.53404e-06	0.00017263	3.76288
ENSMUSG00000040084	269.032	0.787406	0.256659	3.06791	0.00215562	0.0397496	1.40067
ENSMUSG00000040147	743.122	0.381677	0.117958	3.23571	0.00121339	0.0261441	1.58263
ENSMUSG00000040152	359.829	0.653491	0.198724	3.28844	0.00100744	0.0227013	1.64395
ENSMUSG00000040170	142.526	1.06039	0.165286	6.41548	1.40377e-10	1.44477e-08	7.8402
ENSMUSG00000040181	150.214	0.441207	0.129366	3.41052	0.000648391	0.0159064	1.79843
ENSMUSG00000040213	262.346	0.346886	0.109038	3.18135	0.00146592	0.0301747	1.52036
ENSMUSG00000040229	199.217	0.856374	0.167774	5.10433	3.31961e-07	2.02918e-05	4.69268
ENSMUSG00000040253	389.816	1.11072	0.134225	8.27509	1.28354e-16	2.53591e-14	13.5959
ENSMUSG00000040254	501.579	0.393336	0.125202	3.14161	0.00168024	0.0335562	1.47423
ENSMUSG00000040296	537.666	1.57504	0.124476	12.6533	1.07275e-36	7.41805e-34	33.1297
ENSMUSG00000040387	1647.4	0.210722	0.0590136	3.57074	0.000355979	0.00984638	2.00672
ENSMUSG00000040483	195.456	1.00878	0.148823	6.77835	1.21559e-11	1.41571e-09	8.84903
ENSMUSG00000040502	293.018	-0.334574	0.10402	-3.21643	0.00129794	0.0275104	1.5605
ENSMUSG00000040528	13.3354	2.23275	0.433223	5.15381	2.55248e-07	1.59102e-05	4.79832
ENSMUSG00000040536	1619.49	0.551204	0.14387	3.83125	0.000127493	0.00420441	2.3763
ENSMUSG00000040552	129.989	1.74419	0.184583	9.44939	3.40799e-21	1.00549e-18	17.9976
ENSMUSG00000040564	61.8106	0.974314	0.218809	4.45281	8.4754e-06	0.000379643	3.42062
ENSMUSG00000040565	6428.78	-0.570454	0.0584862	-9.75366	1.77942e-22	5.46875e-20	19.2621
ENSMUSG00000040569	205.307	0.658777	0.2038	3.23247	0.00122725	0.02634	1.57938
ENSMUSG00000040606	1946.37	-0.312172	0.0820411	-3.80507	0.000141764	0.00459963	2.33728
ENSMUSG00000040613	114.96	1.1308	0.156924	7.20602	5.76103e-13	7.86914e-11	10.1041
ENSMUSG00000040653	279.846	-0.779836	0.123567	-6.31102	2.77205e-10	2.78818e-08	7.55468
ENSMUSG00000040669	987.203	-0.25212	0.0812017	-3.10485	0.00190373	0.036791	1.43426
ENSMUSG00000040675	1404.71	0.346139	0.0979527	3.53374	0.000409724	0.0110632	1.95612
ENSMUSG00000040724	26059	-0.243535	0.0645628	-3.77206	0.000161904	0.00507451	2.29461
ENSMUSG00000040747	178.042	1.1253	0.171193	6.5733	4.9212e-11	5.3909e-09	8.26834
ENSMUSG00000040751	71.5801	0.725476	0.221814	3.27065	0.00107299	0.0239242	1.62116
ENSMUSG00000040812	672.698	0.306113	0.0988702	3.09611	0.00196076	0.0374354	1.42672
ENSMUSG00000040852	539.611	0.332049	0.0768581	4.32029	1.55825e-05	0.000650585	3.1867
ENSMUSG00000040972	876.638	-0.622488	0.141721	-4.39235	1.12132e-05	0.000486519	3.3129
ENSMUSG00000040987	127.614	0.484395	0.154014	3.14514	0.00166008	0.0332436	1.47829
ENSMUSG00000041046	164.448	-0.940986	0.126305	-7.45009	9.3278e-14	1.39463e-11	10.8555
ENSMUSG00000041062	56.7516	1.96189	0.265032	7.40247	1.33675e-13	1.94603e-11	10.7109
ENSMUSG00000041120	890.998	0.387048	0.0868476	4.45664	8.32559e-06	0.000375977	3.42484
ENSMUSG00000041134	171.879	-0.430431	0.116562	-3.69272	0.000221864	0.00661646	2.17937
ENSMUSG00000041143	96.5738	0.580233	0.158978	3.64978	0.000262469	0.00767227	2.11508
ENSMUSG00000041180	1058.24	-0.31314	0.0858131	-3.6491	0.000263164	0.00768244	2.1145
ENSMUSG00000041329	9170.82	-0.398221	0.119246	-3.3395	0.000839304	0.0196781	1.70602
ENSMUSG00000041390	160.575	0.66835	0.174752	3.82456	0.000131003	0.00430734	2.36579
ENSMUSG00000041453	9193.97	0.3039	0.0976721	3.11143	0.00186182	0.0362684	1.44047
ENSMUSG00000041460	78.9244	-0.516079	0.159557	-3.23445	0.00121879	0.0262347	1.58112
ENSMUSG00000041471	711.425	0.327882	0.0976265	3.35854	0.000783559	0.0186236	1.72994
ENSMUSG00000041515	131.327	1.3344	0.156534	8.52468	1.53237e-17	3.42509e-15	14.4653
ENSMUSG00000041538	17.0162	1.53491	0.375275	4.0901	4.31194e-05	0.00162824	2.78828
ENSMUSG00000041559	373.259	0.421256	0.135758	3.103	0.00191573	0.0368299	1.4338
ENSMUSG00000041594	2191.41	0.241291	0.0753672	3.20155	0.00136692	0.0286545	1.54281
ENSMUSG00000041596	247.682	0.849706	0.247658	3.43096	0.00060145	0.0150213	1.82329
ENSMUSG00000041688	3202.25	-0.221043	0.0613447	-3.60329	0.000314213	0.00887983	2.0516
ENSMUSG00000041731	518.231	0.299456	0.0953947	3.13913	0.00169451	0.0337802	1.47134
ENSMUSG00000041736	80.4412	0.893559	0.216065	4.1356	3.54028e-05	0.00135535	2.86795
ENSMUSG00000041794	1364.51	0.277611	0.0841969	3.29717	0.000976655	0.0221465	1.65469
ENSMUSG00000041797	676.744	0.382799	0.124001	3.08706	0.00202149	0.0380716	1.4194
ENSMUSG00000041817	2054.2	0.635727	0.120308	5.28418	1.26268e-07	8.41585e-06	5.0749
ENSMUSG00000041827	21.3956	2.00904	0.389932	5.15228	2.57332e-07	1.5995e-05	4.79601
ENSMUSG00000041828	742.943	1.30758	0.100318	13.0343	7.80344e-39	5.95429e-36	35.2252
ENSMUSG00000041921	1408.33	0.261747	0.0772694	3.38745	0.000705446	0.0170431	1.76845
ENSMUSG00000042010	439.278	0.441032	0.146648	3.00742	0.00263472	0.046278	1.33463
ENSMUSG00000042063	Zfp386
ENSMUSG00000042198	1013.56	0.331294	0.0994166	3.33238	0.000861075	0.020099	1.69682
ENSMUSG00000042246	1091.32	-0.439557	0.0675364	-6.50845	7.59318e-11	8.1564e-09	8.0885
ENSMUSG00000042256	1995.58	-0.346052	0.0773932	-4.47134	7.77297e-06	0.00035246	3.45289
ENSMUSG00000042501	5.30132	2.43173	0.757366	3.21077	0.0013238	0.0279247	1.55401
ENSMUSG00000042532	2704.08	-0.481624	0.0591432	-8.14335	3.84491e-16	7.03141e-14	13.153
ENSMUSG00000042581	139.371	0.852453	0.283575	3.0061	0.00264623	0.0463992	1.33349
ENSMUSG00000042644	1668.55	0.99556	0.186605	5.33511	9.5485e-08	6.52127e-06	5.18567
ENSMUSG00000042734	2125.9	-0.270641	0.0754317	-3.5879	0.00033335	0.00931361	2.03088
ENSMUSG00000042763	1898.21	-0.2715	0.0749137	-3.62417	0.000289894	0.00829854	2.081
ENSMUSG00000042826	1352.54	-0.389256	0.0919563	-4.23305	2.3054e-05	0.000914226	3.03895
ENSMUSG00000042834	21292.5	-0.548504	0.104743	-5.23665	1.6352e-07	1.05492e-05	4.97678
ENSMUSG00000042873	2608.44	-0.25925	0.0691566	-3.74874	0.000177726	0.00550032	2.25961
ENSMUSG00000043090	Zfp866
ENSMUSG00000043157	18.0448	1.74937	0.359634	4.86431	1.14859e-06	6.22943e-05	4.20555
ENSMUSG00000043263	31.5616	2.06865	0.296536	6.97604	3.03611e-12	3.906e-10	9.40827
ENSMUSG00000043279	724.151	0.398135	0.112912	3.52606	0.000421788	0.0113131	1.94642
ENSMUSG00000043301	1633.14	-0.387596	0.100728	-3.84796	0.000119105	0.00394545	2.4039
ENSMUSG00000043458	541.826	0.578309	0.11597	4.98673	6.14095e-07	3.52953e-05	4.45228
ENSMUSG00000043557	319.896	-0.754327	0.163249	-4.62073	3.82394e-06	0.000185562	3.73151
ENSMUSG00000043740	9.6697	2.55775	0.561964	4.55145	5.32774e-06	0.000252988	3.5969
ENSMUSG00000043773	1700048O20Rik
ENSMUSG00000043943	135.124	0.906024	0.154602	5.86037	4.61825e-09	4.07142e-07	6.39025
ENSMUSG00000043964	747.649	-0.27645	0.0769523	-3.59248	0.000327547	0.00918626	2.03686
ENSMUSG00000044042	2201.35	0.535124	0.100947	5.30105	1.15137e-07	7.72049e-06	5.11236
ENSMUSG00000044043	1908.13	0.877766	0.0877669	10.0011	1.50692e-23	4.90371e-21	20.3095
ENSMUSG00000044164	1540.9	-0.293672	0.0925086	-3.17454	0.00150074	0.0306789	1.51316
ENSMUSG00000044244	2036.18	0.274532	0.0882199	3.1119	0.00185886	0.0362684	1.44047
ENSMUSG00000044296	Zfp879
ENSMUSG00000044345	326.6	0.315848	0.0999586	3.15979	0.00157885	0.0319709	1.49524
ENSMUSG00000044468	127.272	1.66208	0.169032	9.83293	8.12212e-23	2.56752e-20	19.5905
ENSMUSG00000044499	261.267	-0.649664	0.138369	-4.69517	2.66382e-06	0.000135818	3.86704
ENSMUSG00000044501	Zfp758
ENSMUSG00000044518	7.15299	-5.7935	1.06982	-5.41538	6.11594e-08	4.32375e-06	5.36414
ENSMUSG00000044576	385.846	-0.488098	0.113508	-4.30014	1.70693e-05	0.000708649	3.14957
ENSMUSG00000044583	86.5126	1.09323	0.171265	6.38326	1.73352e-10	1.7759e-08	7.75058
ENSMUSG00000044667	3392.9	-0.260347	0.0496204	-5.24677	1.54789e-07	1.00445e-05	4.99807
ENSMUSG00000044676	Zfp612
ENSMUSG00000044707	374.742	-0.489919	0.158936	-3.08249	0.0020528	0.0384626	1.41496
ENSMUSG00000044708	5638.41	-0.362223	0.100686	-3.59754	0.000321244	0.00902094	2.04475
ENSMUSG00000044719	19.5474	1.72974	0.332729	5.19866	2.00732e-07	1.27272e-05	4.89527
ENSMUSG00000044783	3555.85	0.239844	0.0627663	3.82121	0.000132796	0.00435981	2.36053
ENSMUSG00000044807	Zfp354c
ENSMUSG00000044811	73.7331	1.19703	0.185218	6.46283	1.02765e-10	1.09854e-08	7.95918
ENSMUSG00000044827	20.3624	1.67104	0.348118	4.80021	1.58499e-06	8.37057e-05	4.07724
ENSMUSG00000044921	231.571	0.707192	0.132593	5.33356	9.63034e-08	6.55693e-06	5.1833
ENSMUSG00000044933	608.961	-0.955169	0.115768	-8.25075	1.5741e-16	3.05541e-14	13.5149
ENSMUSG00000045053	10.1232	1.85744	0.609337	3.0483	0.00230139	0.0418793	1.378
ENSMUSG00000045201	830.077	-0.351155	0.0969427	-3.62229	0.000292001	0.0083373	2.07897
ENSMUSG00000045215	432.603	-0.672753	0.132828	-5.06483	4.08773e-07	2.44468e-05	4.61178
ENSMUSG00000045251	Zfp688
ENSMUSG00000045288	69.7955	0.748316	0.233945	3.19869	0.00138053	0.0288465	1.53991
ENSMUSG00000045466	Zfp956
ENSMUSG00000045498	168.39	0.51824	0.151492	3.4209	0.000624145	0.0154142	1.81208
ENSMUSG00000045502	7.58148	4.07262	0.863067	4.71877	2.37276e-06	0.00012182	3.91428
ENSMUSG00000045519	Zfp560
ENSMUSG00000045573	2772.29	0.347814	0.0879939	3.9527	7.72733e-05	0.00275347	2.56012
ENSMUSG00000045664	540.052	-0.301414	0.0810326	-3.71966	0.000199489	0.00603871	2.21906
ENSMUSG00000045679	32.9559	0.904911	0.258484	3.50084	0.000463797	0.0121547	1.91526
ENSMUSG00000045757	Zfp764
ENSMUSG00000045827	478.1	0.563027	0.144334	3.90087	9.58482e-05	0.00331914	2.47897
ENSMUSG00000045876	300.77	0.688888	0.158444	4.34783	1.37492e-05	0.000583958	3.23362
ENSMUSG00000045912	56.5329	-0.70929	0.229077	-3.0963	0.00195954	0.0374354	1.42672
ENSMUSG00000045932	584.016	1.34774	0.180414	7.47027	8.00315e-14	1.21297e-11	10.9161
ENSMUSG00000046027	1075.23	0.411303	0.095837	4.29169	1.77315e-05	0.000733386	3.13467
ENSMUSG00000046152	927.06	0.401304	0.100953	3.97517	7.03285e-05	0.00254286	2.59468
ENSMUSG00000046157	3517.88	-0.280701	0.0821012	-3.41896	0.000628608	0.0155071	1.80947
ENSMUSG00000046160	725.151	-0.355715	0.102306	-3.47699	0.000507085	0.0130207	1.88536
ENSMUSG00000046169	952.92	0.361394	0.109328	3.30561	0.000947713	0.021668	1.66418
ENSMUSG00000046185	Zfp84
ENSMUSG00000046186	151.311	1.79441	0.206998	8.66874	4.36937e-18	1.03963e-15	14.9831
ENSMUSG00000046215	36.569	1.44872	0.266395	5.43824	5.38092e-08	3.82858e-06	5.41696
ENSMUSG00000046230	10699.4	0.280739	0.0771152	3.64052	0.000272087	0.00791163	2.10173
ENSMUSG00000046240	1472.23	-0.305716	0.0987581	-3.09561	0.00196411	0.0374657	1.42637
ENSMUSG00000046410	67.4061	0.643274	0.183413	3.50724	0.000452774	0.0119701	1.9219
ENSMUSG00000046598	1527.2	-0.239621	0.0763651	-3.13784	0.00170199	0.0338081	1.47098
ENSMUSG00000046658	Zfp316
ENSMUSG00000046688	198.536	0.620586	0.142898	4.34285	1.40643e-05	0.000596198	3.22461
ENSMUSG00000046718	128.681	2.00284	0.178774	11.2032	3.93398e-29	1.77655e-26	25.7504
ENSMUSG00000046719	392.743	0.47129	0.150347	3.13469	0.00172035	0.0340805	1.46749
ENSMUSG00000046761	172.179	-0.511291	0.144695	-3.53358	0.000409972	0.0110632	1.95612
ENSMUSG00000046764	48.8899	3.59749	0.451567	7.96668	1.62988e-15	2.86237e-13	12.5433
ENSMUSG00000046805	907.302	2.01451	0.103879	19.3929	8.86681e-84	6.54016e-80	79.1844
ENSMUSG00000046807	752.19	-0.309857	0.0987369	-3.13821	0.00169982	0.0338081	1.47098
ENSMUSG00000046844	4763.93	-0.416262	0.113632	-3.66324	0.000249042	0.00733794	2.13443
ENSMUSG00000046879	618.26	1.80827	0.13	13.9098	5.525e-44	6.11286e-41	40.2138
ENSMUSG00000047013	1975.04	-0.322025	0.0824903	-3.90379	9.46985e-05	0.00328446	2.48354
ENSMUSG00000047036	Zfp445
ENSMUSG00000047090	419.1	-0.327551	0.0949523	-3.44963	0.000561345	0.0141959	1.84784
ENSMUSG00000047115	31.7131	1.11581	0.289839	3.84977	0.000118228	0.00392228	2.40646
ENSMUSG00000047117	31.1412	1.8974	0.297528	6.37719	1.80368e-10	1.83925e-08	7.73536
ENSMUSG00000047146	3566.13	-0.248012	0.0732464	-3.38599	0.000709222	0.0170955	1.76712
ENSMUSG00000047228	24.9975	-1.47917	0.47529	-3.11214	0.00185737	0.0362684	1.44047
ENSMUSG00000047307	307.855	0.542804	0.113995	4.76165	1.92018e-06	0.000100449	3.99806
ENSMUSG00000047342	Zfp286
ENSMUSG00000047361	188.608	0.976503	0.220873	4.42111	9.81954e-06	0.000434574	3.36194
ENSMUSG00000047419	2804.25	-0.279776	0.087557	-3.19536	0.00139659	0.0290721	1.53652
ENSMUSG00000047473	Zfp30
ENSMUSG00000047603	Zfp235
ENSMUSG00000047632	206.222	-1.21928	0.149056	-8.18005	2.8373e-16	5.23198e-14	13.2813
ENSMUSG00000047735	575.934	1.19707	0.154651	7.74045	9.90672e-15	1.61188e-12	11.7927
ENSMUSG00000047747	2483.36	-0.201213	0.0659538	-3.05081	0.00228226	0.041644	1.38045
ENSMUSG00000047810	37.9845	0.814648	0.245927	3.31256	0.000924452	0.0212906	1.67181
ENSMUSG00000047875	197.057	0.424716	0.142453	2.98145	0.00286888	0.0493471	1.30674
ENSMUSG00000047945	438.987	-0.379141	0.112947	-3.3568	0.000788508	0.0187212	1.72767
ENSMUSG00000047976	11613.5	-0.323914	0.0941615	-3.43998	0.00058176	0.0145854	1.83608
ENSMUSG00000047992	318.958	0.350122	0.0965643	3.62579	0.000288076	0.00826158	2.08294
ENSMUSG00000048012	Zfp473
ENSMUSG00000048148	6680.21	-0.218312	0.0628683	-3.47254	0.000515567	0.0131738	1.88029
ENSMUSG00000048200	79.1465	0.607073	0.168178	3.60971	0.000306538	0.00867401	2.06178
ENSMUSG00000048249	17249.9	0.294065	0.0963915	3.05074	0.00228282	0.041644	1.38045
ENSMUSG00000048280	Zfp738
ENSMUSG00000048304	670.933	-0.584896	0.157538	-3.71272	0.000205041	0.00616461	2.21009
ENSMUSG00000048424	583.106	0.820959	0.138614	5.92263	3.16834e-09	2.83842e-07	6.54692
ENSMUSG00000048458	1381.89	-0.402512	0.0825512	-4.87591	1.08308e-06	5.90308e-05	4.22892
ENSMUSG00000048489	48.6647	1.44739	0.368974	3.92275	8.75446e-05	0.0030749	2.51217
ENSMUSG00000048521	5.66221	4.05959	0.954287	4.25405	2.09935e-05	0.000843095	3.07412
ENSMUSG00000048612	300.674	0.546671	0.112208	4.87192	1.10516e-06	6.00862e-05	4.22123
ENSMUSG00000048728	Zfp454
ENSMUSG00000048779	31.8431	1.03122	0.277349	3.71814	0.000200695	0.0060669	2.21703
ENSMUSG00000048865	102.366	0.913121	0.136744	6.67759	2.42898e-11	2.72834e-09	8.5641
ENSMUSG00000048921	Zfp689
ENSMUSG00000049097	932.48	-0.412842	0.122595	-3.36751	0.000758492	0.0182038	1.73984
ENSMUSG00000049107	156.493	-1.50746	0.154303	-9.76953	1.52151e-22	4.74195e-20	19.324
ENSMUSG00000049265	2099.99	-0.298135	0.0876668	-3.40078	0.000671947	0.0163574	1.78629
ENSMUSG00000049287	208.851	-0.328414	0.106959	-3.07047	0.00213723	0.0394763	1.40366
ENSMUSG00000049502	570.525	0.910471	0.108575	8.38561	5.0464e-17	1.06215e-14	13.9738
ENSMUSG00000049511	803.368	-0.336513	0.0790042	-4.25943	2.04945e-05	0.000824549	3.08378
ENSMUSG00000049555	196.72	0.373133	0.10828	3.446	0.000568946	0.0143227	1.84398
ENSMUSG00000049556	571.306	-0.441133	0.116335	-3.79192	0.000149487	0.00477322	2.32119
ENSMUSG00000049685	8.60259	-4.87553	1.25761	-3.87683	0.000105826	0.00360264	2.44338
ENSMUSG00000049721	259.824	-0.504964	0.155303	-3.25148	0.00114804	0.0251773	1.59899
ENSMUSG00000049723	24.3318	7.37384	0.944985	7.80313	6.0389e-15	1.01234e-12	11.9947
ENSMUSG00000049866	3970.64	0.322325	0.0633502	5.08799	3.61875e-07	2.19386e-05	4.65879
ENSMUSG00000049872	75.7478	0.631449	0.169221	3.73151	0.000190335	0.00582536	2.23468
ENSMUSG00000050071	1801.24	0.330318	0.100184	3.29712	0.000976818	0.0221465	1.65469
ENSMUSG00000050122	12.8695	1.3318	0.446714	2.98132	0.00287011	0.0493471	1.30674
ENSMUSG00000050310	14214.6	0.203304	0.0678785	2.99511	0.00274343	0.0476878	1.32159
ENSMUSG00000050335	169.152	2.55287	0.151927	16.8033	2.30906e-63	6.38685e-60	59.1947
ENSMUSG00000050530	1051.03	-0.224377	0.0632425	-3.54788	0.000388342	0.0105692	1.97596
ENSMUSG00000050556	2522.18	0.360168	0.113199	3.18173	0.00146398	0.0301747	1.52036
ENSMUSG00000050558	96.2277	2.27964	0.318801	7.15068	8.63508e-13	1.16326e-10	9.93432
ENSMUSG00000050605	Zfp61
ENSMUSG00000050708	3141.83	0.467705	0.0943851	4.95528	7.22264e-07	4.10855e-05	4.38631
ENSMUSG00000050821	2261.9	-0.363795	0.114338	-3.18174	0.00146394	0.0301747	1.52036
ENSMUSG00000050822	640.366	-0.403992	0.123905	-3.2605	0.00111215	0.024536	1.6102
ENSMUSG00000050844	1700020N01Rik
ENSMUSG00000050855	Zfp940
ENSMUSG00000050954	Zfp169
ENSMUSG00000051029	266.684	0.823685	0.188739	4.36416	1.27615e-05	0.000546202	3.26265
ENSMUSG00000051037	Zfp455
ENSMUSG00000051067	1893.51	-0.283501	0.0744262	-3.80915	0.000139444	0.00454124	2.34283
ENSMUSG00000051111	5252.19	-0.457157	0.144026	-3.17413	0.00150289	0.0306789	1.51316
ENSMUSG00000051212	33.6107	0.869934	0.264978	3.28304	0.00102694	0.0230702	1.63695
ENSMUSG00000051236	465.478	0.373172	0.0888397	4.20051	2.66313e-05	0.00104485	2.98094
ENSMUSG00000051242	622.284	0.710074	0.0909856	7.80425	5.98562e-15	1.01107e-12	11.9952
ENSMUSG00000051341	Zfp52
ENSMUSG00000051351	Zfp46
ENSMUSG00000051486	564.894	0.865773	0.114467	7.5635	3.92363e-14	6.07147e-12	11.2167
ENSMUSG00000051498	18.7369	1.25036	0.405171	3.086	0.0020287	0.0381078	1.41899
ENSMUSG00000051499	Zfp786
ENSMUSG00000051506	103.42	0.99627	0.159716	6.23775	4.43907e-10	4.34636e-08	7.36187
ENSMUSG00000051599	202.344	1.03395	0.169906	6.08541	1.16197e-09	1.07133e-07	6.97008
ENSMUSG00000051615	1338.17	-0.31655	0.093347	-3.39111	0.000696114	0.0168714	1.77285
ENSMUSG00000051652	88.8747	0.547738	0.180795	3.0296	0.00244875	0.0440535	1.35602
ENSMUSG00000051678	280.284	0.586871	0.123427	4.75479	1.98655e-06	0.000103675	3.98432
ENSMUSG00000051790	3261.1	-0.406451	0.120345	-3.37739	0.000731775	0.0176008	1.75447
ENSMUSG00000051977	Prdm9
ENSMUSG00000052040	3043.79	-0.614746	0.124759	-4.92748	8.32986e-07	4.71415e-05	4.3266
ENSMUSG00000052085	185.3	0.617239	0.122608	5.03423	4.79764e-07	2.82346e-05	4.54922
ENSMUSG00000052142	38.9268	1.19052	0.246701	4.82577	1.39461e-06	7.45409e-05	4.12761
ENSMUSG00000052160	157.751	1.08191	0.144052	7.51056	5.88746e-14	8.98468e-12	11.0465
ENSMUSG00000052188	50.3609	1.01228	0.228689	4.42645	9.57957e-06	0.000425656	3.37094
ENSMUSG00000052229	583.869	-1.07805	0.195271	-5.52075	3.37548e-08	2.46505e-06	5.60817
ENSMUSG00000052276	94.6825	2.84218	0.207379	13.7053	9.44279e-43	9.95001e-40	39.0022
ENSMUSG00000052305	277.144	2.26797	0.73507	3.08537	0.00203296	0.0381555	1.41844
ENSMUSG00000052336	717.238	0.765868	0.0905521	8.45775	2.72575e-17	5.97182e-15	14.2239
ENSMUSG00000052397	1274.45	0.794015	0.142204	5.58363	2.35547e-08	1.7789e-06	5.74985
ENSMUSG00000052446	Zfp961
ENSMUSG00000052525	82.6722	0.866944	0.228488	3.79426	0.000148085	0.00474215	2.32403
ENSMUSG00000052675	Zfp112
ENSMUSG00000052749	8.57799	2.23292	0.569646	3.91983	8.86119e-05	0.00310746	2.50759
ENSMUSG00000052763	Zfp212
ENSMUSG00000052776	61.7512	1.79671	0.202547	8.87055	7.27827e-19	1.78948e-16	15.7473
ENSMUSG00000052909	Gm9894
ENSMUSG00000052912	10.7059	1.72929	0.539016	3.20823	0.00133553	0.0281186	1.55101
ENSMUSG00000052942	117.852	0.541454	0.163204	3.31765	0.000907781	0.020968	1.67844
ENSMUSG00000052974	14.593	-2.03784	0.416086	-4.89765	9.69891e-07	5.3924e-05	4.26822
ENSMUSG00000053040	341.12	0.379875	0.0986679	3.85003	0.000118102	0.00392228	2.40646
ENSMUSG00000053158	109.179	0.670887	0.141577	4.73867	2.15122e-06	0.000111742	3.95178
ENSMUSG00000053199	5498.25	-0.239381	0.0633876	-3.77647	0.000159067	0.00500687	2.30043
ENSMUSG00000053318	6.18148	2.88271	0.713725	4.03897	5.36862e-05	0.00199659	2.69971
ENSMUSG00000053332	2162.73	0.247221	0.0825814	2.99367	0.00275644	0.0478388	1.32022
ENSMUSG00000053347	Zfp943
ENSMUSG00000053390	Zfp952
ENSMUSG00000053399	1223.35	-0.772485	0.170621	-4.52749	5.96896e-06	0.000279833	3.5531
ENSMUSG00000053465	159.916	-0.678176	0.220807	-3.07135	0.00213094	0.039393	1.40458
ENSMUSG00000053541	9.91881	3.22472	0.615262	5.24121	1.59524e-07	1.03215e-05	4.98626
ENSMUSG00000053600	Zfp472
ENSMUSG00000053835	134.008	0.779356	0.16705	4.66541	3.07995e-06	0.000154193	3.81194
ENSMUSG00000053977	6.45016	3.48267	0.802833	4.33797	1.43805e-05	0.000604967	3.21827
ENSMUSG00000053985	Zfp14
ENSMUSG00000054027	1773.32	-0.277982	0.0676109	-4.1115	3.93095e-05	0.00149714	2.82474
ENSMUSG00000054072	217.635	1.45454	0.262011	5.55146	2.83295e-08	2.1036e-06	5.67704
ENSMUSG00000054280	5313.73	-0.270137	0.0771175	-3.50293	0.000460177	0.0120936	1.91745
ENSMUSG00000054381	Zfp747
ENSMUSG00000054509	1214.67	0.905292	0.126725	7.14375	9.08197e-13	1.21064e-10	9.91699
ENSMUSG00000054519	Zfp867
ENSMUSG00000054626	22.4592	1.07919	0.321561	3.3561	0.000790486	0.018748	1.72705
ENSMUSG00000054640	19514.7	-0.302208	0.0675106	-4.47645	7.58951e-06	0.000345557	3.46148
ENSMUSG00000054648	Zfp869
ENSMUSG00000054675	254.228	0.667424	0.127616	5.22995	1.69557e-07	1.09068e-05	4.9623
ENSMUSG00000054717	220.859	0.491958	0.130752	3.76252	0.000168207	0.00524976	2.27986
ENSMUSG00000054737	Zfp182
ENSMUSG00000054863	1634.91	-0.269403	0.0882635	-3.05225	0.0022713	0.0415193	1.38175
ENSMUSG00000054889	39.8415	1.04346	0.347732	3.00076	0.00269304	0.0469798	1.32809
ENSMUSG00000054893	Zfp667
ENSMUSG00000054920	1366.08	-0.260767	0.0712568	-3.65954	0.000252665	0.00741507	2.12988
ENSMUSG00000054967	Zfp647
ENSMUSG00000055053	2017.9	-0.46748	0.147008	-3.17996	0.00147296	0.0302354	1.51948
ENSMUSG00000055067	2153.65	0.281722	0.0845303	3.33279	0.000859803	0.020099	1.69682
ENSMUSG00000055102	Zfp819
ENSMUSG00000055150	Zfp78
ENSMUSG00000055172	35.5066	1.49824	0.324329	4.6195	3.84668e-06	0.000186257	3.72989
ENSMUSG00000055202	Zfp811
ENSMUSG00000055228	Zfp935
ENSMUSG00000055240	Zfp101
ENSMUSG00000055305	Zfp93
ENSMUSG00000055341	Zfp457
ENSMUSG00000055480	Zfp458
ENSMUSG00000055489	273.841	0.643303	0.160868	3.99894	6.3627e-05	0.00232717	2.63317
ENSMUSG00000055541	484.33	0.575337	0.0984839	5.84194	5.15967e-09	4.45989e-07	6.35068
ENSMUSG00000055560	Zfp459
ENSMUSG00000055676	160.186	-0.447182	0.112	-3.99271	6.53217e-05	0.00238128	2.62319
ENSMUSG00000055835	Zfp1
ENSMUSG00000055945	880.261	-0.418844	0.123482	-3.39194	0.000693989	0.0168384	1.7737
ENSMUSG00000055991	Zkscan5
ENSMUSG00000055994	22.5248	0.900795	0.29065	3.09924	0.00194016	0.0372349	1.42905
ENSMUSG00000056014	A430033K04Rik
ENSMUSG00000056019	Zfp709
ENSMUSG00000056031	60.8823	1.33664	0.228569	5.84786	4.97934e-09	4.32089e-07	6.36443
ENSMUSG00000056069	229.882	0.465396	0.110087	4.22753	2.36273e-05	0.000933615	3.02983
ENSMUSG00000056116	845.886	0.56949	0.0935957	6.08458	1.16799e-09	1.07242e-07	6.96964
ENSMUSG00000056144	203.431	1.40836	0.156912	8.97548	2.82107e-19	7.09371e-17	16.1491
ENSMUSG00000056215	68.083	0.723468	0.217417	3.32757	0.000876082	0.0203848	1.69069
ENSMUSG00000056267	1134.12	0.326276	0.0886991	3.67846	0.000234645	0.00696008	2.15739
ENSMUSG00000056290	7.36803	3.70814	0.759889	4.87984	1.06172e-06	5.81529e-05	4.23543
ENSMUSG00000056296	2495.63	0.587703	0.117751	4.99106	6.00488e-07	3.47843e-05	4.45862
ENSMUSG00000056300	Gm13247 (Zfp981)
ENSMUSG00000056383	AI987944
ENSMUSG00000056413	2215.52	-0.218917	0.0613045	-3.57097	0.000355658	0.00984638	2.00672
ENSMUSG00000056427	601.463	-0.569965	0.163254	-3.49129	0.000480703	0.0125141	1.9026
ENSMUSG00000056529	52.4701	0.887399	0.22918	3.87206	0.000107921	0.00366271	2.4362
ENSMUSG00000056552	Zfp953
ENSMUSG00000056592	Zfp658
ENSMUSG00000056737	134.596	1.42879	0.152322	9.38004	6.59498e-21	1.87095e-18	17.7279
ENSMUSG00000056824	Zfp663
ENSMUSG00000056888	13.8849	3.44785	0.564223	6.11079	9.91417e-10	9.21768e-08	7.03538
ENSMUSG00000056938	1339.22	0.221662	0.0721057	3.07412	0.00211124	0.0392255	1.40643
ENSMUSG00000056999	6362.55	-1.11424	0.0670964	-16.6065	6.25076e-62	1.53685e-58	57.8134
ENSMUSG00000057003	11.1798	-2.79837	0.860076	-3.25363	0.00113939	0.0250371	1.60142
ENSMUSG00000057093	C030039L03Rik
ENSMUSG00000057101	Zfp180
ENSMUSG00000057143	217.537	0.854856	0.10804	7.91241	2.52459e-15	4.36438e-13	12.3601
ENSMUSG00000057191	9.86012	1.36211	0.449898	3.02761	0.00246497	0.0443095	1.3535
ENSMUSG00000057254	Zfp870
ENSMUSG00000057337	105.996	-0.816047	0.155413	-5.25083	1.51414e-07	9.85436e-06	5.00637
ENSMUSG00000057346	16.8853	2.80381	0.498961	5.6193	1.91738e-08	1.48349e-06	5.82872
ENSMUSG00000057396	Zfp759
ENSMUSG00000057409	Zfp53
ENSMUSG00000057411	1204.04	-0.282931	0.0666547	-4.24473	2.18858e-05	0.000874169	3.0584
ENSMUSG00000057551	Zfp317
ENSMUSG00000057596	186.908	2.18261	0.14217	15.3521	3.42893e-53	6.32294e-50	49.1991
ENSMUSG00000057606	87.0353	-0.722711	0.195688	-3.69318	0.000221464	0.00661343	2.17957
ENSMUSG00000057691	Zfp746
ENSMUSG00000057835	Zfp119a
ENSMUSG00000057842	Zfp595
ENSMUSG00000057982	Zfp809
ENSMUSG00000058070	3526.56	-0.297417	0.0738847	-4.02543	5.68722e-05	0.00209396	2.67903
ENSMUSG00000058093	AA987161
ENSMUSG00000058163	23.7293	2.58926	0.370191	6.99437	2.66449e-12	3.44795e-10	9.46244
ENSMUSG00000058186	Gm13242 (Zfp980)
ENSMUSG00000058192	Zfp846
ENSMUSG00000058246	Gm10037
ENSMUSG00000058248	4946.86	0.282061	0.0875642	3.22119	0.00127658	0.0271616	1.56604
ENSMUSG00000058291	Zfp68
ENSMUSG00000058331	Zfp85-rs1
ENSMUSG00000058447	Zfp82
ENSMUSG00000058454	425.626	-0.361726	0.0993721	-3.64011	0.00027252	0.00791382	2.10161
ENSMUSG00000058586	172.543	0.538996	0.14188	3.79895	0.000145309	0.00467355	2.33035
ENSMUSG00000058638	Zfp110
ENSMUSG00000058715	146.296	1.2699	0.156658	8.10621	5.22249e-16	9.31962e-14	13.0306
ENSMUSG00000058748	Zfp958
ENSMUSG00000058773	246.453	-0.767844	0.134182	-5.7224	1.0503e-08	8.57607e-07	6.06671
ENSMUSG00000058818	28.2312	1.44125	0.310666	4.63924	3.49697e-06	0.000171197	3.7665
ENSMUSG00000058883	Zfp708
ENSMUSG00000058900	Rsl1
ENSMUSG00000058966	874.512	-0.336539	0.105762	-3.18205	0.00146238	0.0301747	1.52036
ENSMUSG00000059000	Zfp799
ENSMUSG00000059089	11.4085	1.62362	0.434765	3.73449	0.000188097	0.00577284	2.23861
ENSMUSG00000059142	Zfp945
ENSMUSG00000059149	1479.17	-0.431478	0.094003	-4.59004	4.4316e-06	0.000212717	3.6722
ENSMUSG00000059182	612.517	0.312363	0.091412	3.41709	0.000632945	0.0155967	1.80697
ENSMUSG00000059316	2592.67	-0.222275	0.0553099	-4.01872	5.85147e-05	0.00215085	2.66739
ENSMUSG00000059423	Zfp933
ENSMUSG00000059456	372.061	1.29148	0.221697	5.82541	5.69718e-09	4.86746e-07	6.3127
ENSMUSG00000059475	Zfp426
ENSMUSG00000059498	296.014	1.09079	0.149222	7.30986	2.67413e-13	3.79316e-11	10.421
ENSMUSG00000059555	185.901	0.370602	0.115884	3.19805	0.00138362	0.0288836	1.53935
ENSMUSG00000059791	91.7619	-0.567191	0.157975	-3.59037	0.000330204	0.00923736	2.03445
ENSMUSG00000059839	Zfp874b
ENSMUSG00000059897	Zfp930
ENSMUSG00000059970	866.904	0.565312	0.0972748	5.81149	6.19191e-09	5.26979e-07	6.27821
ENSMUSG00000059975	Zfp74
ENSMUSG00000060147	1379.24	0.323306	0.0801962	4.03144	5.54368e-05	0.00205135	2.68796
ENSMUSG00000060149	744.434	0.209918	0.0669294	3.13641	0.00171027	0.0339309	1.4694
ENSMUSG00000060206	2406.76	-0.361077	0.0909669	-3.96932	7.20785e-05	0.00259342	2.58613
ENSMUSG00000060240	7086.9	-0.199056	0.0653332	-3.04678	0.00231303	0.0419531	1.37724
ENSMUSG00000060301	2610008E11Rik
ENSMUSG00000060314	Zfp941
ENSMUSG00000060397	Zfp128
ENSMUSG00000060427	Zfp868
ENSMUSG00000060441	45.7498	0.857417	0.259729	3.3012	0.000962724	0.021963	1.65831
ENSMUSG00000060510	Zfp266
ENSMUSG00000060512	299.385	-0.381787	0.107619	-3.54757	0.0003888	0.0105692	1.97596
ENSMUSG00000060519	546.477	0.824692	0.107167	7.69539	1.41063e-14	2.26192e-12	11.6455
ENSMUSG00000060550	15.5192	3.00799	0.485282	6.19844	5.70242e-10	5.51018e-08	7.25883
ENSMUSG00000060568	888.209	-0.566605	0.127681	-4.43767	9.09383e-06	0.000404886	3.39267
ENSMUSG00000060594	191.582	-0.504945	0.111059	-4.54662	5.45134e-06	0.000258302	3.58787
ENSMUSG00000060630	Zfp735
ENSMUSG00000060802	4006.62	1.14652	0.087928	13.0393	7.31222e-39	5.77874e-36	35.2382
ENSMUSG00000060924	1639.32	-0.415758	0.102921	-4.03959	5.3545e-05	0.00199468	2.70013
ENSMUSG00000061132	44.5628	1.47316	0.228618	6.44375	1.1656e-10	1.23409e-08	7.90865
ENSMUSG00000061143	1655.59	-0.516157	0.109342	-4.72057	2.35183e-06	0.000121026	3.91712
ENSMUSG00000061186	184.989	-0.57837	0.17307	-3.34183	0.000832283	0.0195876	1.70802
ENSMUSG00000061232	1092.35	1.35713	0.117907	11.5101	1.17345e-30	5.90137e-28	27.229
ENSMUSG00000061311	148.491	0.412397	0.124175	3.32111	0.000896609	0.020775	1.68246
ENSMUSG00000061532	Zfp955b
ENSMUSG00000061533	430.812	0.311384	0.10107	3.08086	0.00206402	0.0386015	1.4134
ENSMUSG00000061544	Zfp229
ENSMUSG00000061728	6.00426	2.80207	0.708518	3.95483	7.65897e-05	0.00273351	2.56328
ENSMUSG00000061740	1283.43	0.293554	0.0676259	4.34085	1.41934e-05	0.000600286	3.22164
ENSMUSG00000061758	626.726	0.305204	0.0878865	3.4727	0.000515245	0.0131738	1.88029
ENSMUSG00000061898	Rbak
ENSMUSG00000062012	Zfp13
ENSMUSG00000062040	Zfp27
ENSMUSG00000062082	10.0601	2.90562	0.583685	4.97807	6.4221e-07	3.67616e-05	4.43461
ENSMUSG00000062101	Zfp119b
ENSMUSG00000062116	Zfp954
ENSMUSG00000062209	3658.96	-0.430346	0.105798	-4.06764	4.74913e-05	0.00177815	2.75003
ENSMUSG00000062296	9730.35	0.410289	0.076421	5.3688	7.92604e-08	5.51533e-06	5.25843
ENSMUSG00000062345	5.67284	-2.17579	0.694314	-3.13372	0.00172604	0.034132	1.46684
ENSMUSG00000062488	627.238	1.90086	0.143502	13.2462	4.74419e-40	3.88812e-37	36.4103
ENSMUSG00000062518	Zfp534
ENSMUSG00000062519	Zfp398
ENSMUSG00000062540	Zfp781
ENSMUSG00000062542	2250.77	-0.234201	0.0724429	-3.2329	0.00122539	0.0263256	1.57962
ENSMUSG00000062632	Gm12588
ENSMUSG00000062743	Zfp677
ENSMUSG00000062778	8.73058	1.77537	0.590337	3.00738	0.00263514	0.046278	1.33463
ENSMUSG00000062785	5532.1	-0.559104	0.164973	-3.38907	0.000701305	0.0169786	1.7701
ENSMUSG00000062794	Zfp599
ENSMUSG00000062814	Ssxa1
ENSMUSG00000062931	Zfp938
ENSMUSG00000063047	Zfp780b
ENSMUSG00000063065	1644.28	0.156995	0.0495751	3.16681	0.00154118	0.0313594	1.50363
ENSMUSG00000063108	Zfp26
ENSMUSG00000063160	1224.64	-0.36117	0.116344	-3.10434	0.00190702	0.0368012	1.43414
ENSMUSG00000063234	21.7079	1.22521	0.371243	3.30029	0.000965847	0.0220106	1.65737
ENSMUSG00000063239	11644.8	-0.537432	0.112472	-4.77836	1.76731e-06	9.26706e-05	4.03306
ENSMUSG00000063245	Gm13248 (Zfp993)
ENSMUSG00000063268	86.3049	0.779898	0.194758	4.00445	6.21613e-05	0.0022811	2.64186
ENSMUSG00000063286	349.294	1.10963	0.131852	8.41578	3.90281e-17	8.4668e-15	14.0723
ENSMUSG00000063364	3300002I08Rik
ENSMUSG00000063383	Zfp947
ENSMUSG00000063393	Gm10130
ENSMUSG00000063535	Zfp773
ENSMUSG00000063564	330.169	-0.944976	0.0863431	-10.9444	7.06565e-28	2.89535e-25	24.5383
ENSMUSG00000063894	Zfp192
ENSMUSG00000063972	701.068	0.577087	0.129803	4.44587	8.75348e-06	0.000391307	3.40748
ENSMUSG00000064141	Zfp69
ENSMUSG00000064194	Zfp936
ENSMUSG00000064215	830.781	1.72523	0.106451	16.2068	4.51481e-59	9.99037e-56	55.0004
ENSMUSG00000064246	351.954	0.517994	0.142792	3.62762	0.000286051	0.00822044	2.0851
ENSMUSG00000064267	84.9979	1.96354	0.169462	11.5869	4.80265e-31	2.47147e-28	27.607
ENSMUSG00000064294	100.345	1.22284	0.183693	6.65699	2.79484e-11	3.09221e-09	8.50973
ENSMUSG00000064341	92057.6	-0.391018	0.118577	-3.29759	0.000975172	0.0221465	1.65469
ENSMUSG00000064344	73.8579	-0.905011	0.256636	-3.52644	0.000421181	0.0113106	1.94652
ENSMUSG00000064345	32244.9	-0.615157	0.17018	-3.61474	0.000300649	0.00852919	2.06909
ENSMUSG00000064363	31384.2	-0.471122	0.133197	-3.53703	0.000404651	0.0109464	1.96073
ENSMUSG00000064370	75065.6	-0.437369	0.137987	-3.16964	0.00152627	0.0311275	1.50686
ENSMUSG00000064371	79.9882	1.84009	0.568292	3.23793	0.00120402	0.0260436	1.5843
ENSMUSG00000064380	1089.02	0.536787	0.1466	3.66158	0.000250664	0.00737592	2.13218
ENSMUSG00000064451	1075.57	0.637644	0.198523	3.21194	0.0013184	0.0278373	1.55537
ENSMUSG00000065353	4612.71	0.589789	0.158739	3.71545	0.000202839	0.00611502	2.2136
ENSMUSG00000065411	27.3905	-0.87044	0.287037	-3.0325	0.00242534	0.0437392	1.35913
ENSMUSG00000065637	848.534	0.427715	0.11183	3.82469	0.000130939	0.00430734	2.36579
ENSMUSG00000065999	Gm13154 (Zfp985)
ENSMUSG00000066000	2610305D13Rik (Zfp979)
ENSMUSG00000066007	Zfp600
ENSMUSG00000066009	Gm13051 (Zfp987)
ENSMUSG00000066129	9255.85	-0.337816	0.0888933	-3.80025	0.000144553	0.00466278	2.33136
ENSMUSG00000066258	181.807	1.06251	0.122693	8.65995	4.71986e-18	1.11107e-15	14.9543
ENSMUSG00000066613	Zfp932
ENSMUSG00000066677	22.9852	1.78656	0.325409	5.49021	4.0146e-08	2.87492e-06	5.54137
ENSMUSG00000066829	Zfp810
ENSMUSG00000066838	Zfp772
ENSMUSG00000066861	15.5878	2.65723	0.431911	6.15227	7.63812e-10	7.19218e-08	7.14314
ENSMUSG00000066880	Zfp617
ENSMUSG00000066894	181.272	0.440621	0.147003	2.99736	0.00272331	0.0473754	1.32445
ENSMUSG00000067034	Zfp960
ENSMUSG00000067071	340.472	0.454323	0.120155	3.78114	0.000156112	0.00494907	2.30548
ENSMUSG00000067212	348.32	1.11557	0.131786	8.46505	2.56045e-17	5.66577e-15	14.2467
ENSMUSG00000067297	40.3524	1.17414	0.323557	3.62886	0.000284674	0.00819151	2.08664
ENSMUSG00000067424	Zfp563
ENSMUSG00000067430	Zfp763
ENSMUSG00000067455	171.863	0.593796	0.172233	3.44763	0.000565532	0.0142835	1.84516
ENSMUSG00000067480	Gm14403
ENSMUSG00000067586	173.458	0.542326	0.129125	4.2	2.66921e-05	0.00104538	2.98072
ENSMUSG00000067916	Gm13139 (Zfp991)
ENSMUSG00000067919	Gm13138
ENSMUSG00000067928	Zfp760
ENSMUSG00000067931	Zfp948
ENSMUSG00000067942	Zfp160
ENSMUSG00000068129	50.2615	5.27426	0.493116	10.6958	1.06517e-26	3.99493e-24	23.3985
ENSMUSG00000068134	Zfp120
ENSMUSG00000068218	Ssxb9
ENSMUSG00000068219	Ssxb10
ENSMUSG00000068220	447.723	0.871749	0.155692	5.59918	2.1537e-08	1.64904e-06	5.78277
ENSMUSG00000068245	51.5663	1.34617	0.238149	5.65262	1.58016e-08	1.25326e-06	5.90196
ENSMUSG00000068246	14.4385	2.17929	0.546155	3.99023	6.60087e-05	0.00240237	2.61936
ENSMUSG00000068270	434.316	-0.333046	0.102126	-3.26113	0.0011097	0.0245065	1.61072
ENSMUSG00000068373	8925.64	-0.442049	0.0914747	-4.83247	1.34848e-06	7.22497e-05	4.14116
ENSMUSG00000068566	570.566	-0.323798	0.1038	-3.11943	0.00181201	0.0354519	1.45036
ENSMUSG00000068663	4041.13	-0.182345	0.0560218	-3.25488	0.00113438	0.0249519	1.6029
ENSMUSG00000068699	241.941	1.04267	0.150643	6.92146	4.47011e-12	5.62015e-10	9.25025
ENSMUSG00000068869	Gm12258
ENSMUSG00000068959	Zfp619
ENSMUSG00000068962	Zfp114
ENSMUSG00000069044	37.6153	22.5891	3.02704	7.46242	8.49496e-14	1.27875e-11	10.8932
ENSMUSG00000069170	192.996	-0.630976	0.169143	-3.73043	0.000191155	0.00584238	2.23341
ENSMUSG00000069184	Zfp72
ENSMUSG00000069204	Zfp748
ENSMUSG00000069206	Zfp874a
ENSMUSG00000069208	Zfp825
ENSMUSG00000069378	22.2453	1.12587	0.327301	3.43986	0.000582018	0.0145854	1.83608
ENSMUSG00000069476	Zfp616
ENSMUSG00000069516	832.869	2.45317	0.141134	17.3818	1.13288e-67	3.58121e-64	63.446
ENSMUSG00000069662	3638.26	-0.273554	0.0875373	-3.125	0.00177806	0.0348458	1.45785
ENSMUSG00000069727	Gm5595 (Zfp975)
ENSMUSG00000069743	Zfp820
ENSMUSG00000069792	16.5553	2.00827	0.385689	5.20697	1.91954e-07	1.22408e-05	4.91219
ENSMUSG00000069793	47.6208	2.17647	0.259054	8.4016	4.40418e-17	9.40192e-15	14.0268
ENSMUSG00000069806	3207.25	-0.300223	0.0883329	-3.39876	0.000676917	0.0164602	1.78356
ENSMUSG00000069874	263.224	0.996503	0.161501	6.17026	6.81792e-10	6.50288e-08	7.18689
ENSMUSG00000069892	146.178	0.478641	0.137652	3.47719	0.000506703	0.0130207	1.88536
ENSMUSG00000069893	42.9509	1.2344	0.236051	5.22938	1.70083e-07	1.0909e-05	4.96222
ENSMUSG00000069917	40.4163	2.04396	0.528706	3.86596	0.000110651	0.00373245	2.42801
ENSMUSG00000069919	80.6051	2.07526	0.671482	3.09057	0.00199773	0.0379502	1.42079
ENSMUSG00000070031	39.8992	1.09047	0.223349	4.88236	1.04823e-06	5.75566e-05	4.23991
ENSMUSG00000070034	46.2769	1.00644	0.218891	4.59791	4.26749e-06	0.000205285	3.68764
ENSMUSG00000070327	3159.16	1.41646	0.13291	10.6573	1.61271e-26	5.85018e-24	23.2328
ENSMUSG00000070348	1269.3	-0.549243	0.0925272	-5.93602	2.92023e-09	2.6375e-07	6.57881
ENSMUSG00000070420	Zfp498
ENSMUSG00000070469	263.438	0.933474	0.186644	5.00137	5.69246e-07	3.30611e-05	4.48068
ENSMUSG00000070471	55.1111	-0.688629	0.206708	-3.33141	0.000864075	0.0201478	1.69577
ENSMUSG00000070527	109.253	-1.65928	0.177633	-9.34103	9.53972e-21	2.67209e-18	17.5731
ENSMUSG00000070605	Gm13251 (Zfp992)
ENSMUSG00000070709	1700049G17Rik
ENSMUSG00000070847	5.57446	3.29379	0.936113	3.51859	0.000433853	0.0115388	1.93784
ENSMUSG00000071005	7.88578	1.98004	0.571598	3.46405	0.000532107	0.0135494	1.86808
ENSMUSG00000071064	2727.33	-0.263582	0.056071	-4.70085	2.5908e-06	0.0001324	3.87811
ENSMUSG00000071068	16.3219	3.30648	0.506342	6.53013	6.57117e-11	7.12778e-09	8.14705
ENSMUSG00000071203	40.4309	0.988859	0.231401	4.27336	1.9255e-05	0.000784653	3.10532
ENSMUSG00000071256	Zfp213
ENSMUSG00000071266	Zfp946
ENSMUSG00000071267	Zfp942
ENSMUSG00000071281	Zfp71-rs1
ENSMUSG00000071285	Zfp87
ENSMUSG00000071291	Zfp58
ENSMUSG00000071295	Gm10323
ENSMUSG00000071302	Gm10324
ENSMUSG00000071341	24.7101	-1.24884	0.285861	-4.36869	1.24996e-05	0.000536029	3.27081
ENSMUSG00000071477	Zfp777
ENSMUSG00000071713	37.2912	1.00077	0.241828	4.13834	3.49825e-05	0.00134391	2.87163
ENSMUSG00000071722	153.042	-0.398803	0.122102	-3.26616	0.00109018	0.0242204	1.61582
ENSMUSG00000071753	12068.2	-0.548911	0.112919	-4.86109	1.16742e-06	6.31606e-05	4.19955
ENSMUSG00000071816	Ssxb5
ENSMUSG00000071847	590.952	-0.407674	0.11213	-3.63574	0.000277182	0.00800418	2.09668
ENSMUSG00000072115	30.3512	1.11697	0.342873	3.25767	0.00112332	0.0247331	1.60672
ENSMUSG00000072235	9477.86	-0.262759	0.0824773	-3.18583	0.0014434	0.0299059	1.52424
ENSMUSG00000072591	58.5273	-0.604265	0.184742	-3.27085	0.00107223	0.0239242	1.62116
ENSMUSG00000072620	93.8417	1.14948	0.193999	5.92518	3.11956e-09	2.80608e-07	6.5519
ENSMUSG00000072623	Zfp9
ENSMUSG00000072676	510.016	-0.377737	0.0994821	-3.79703	0.00014644	0.00469626	2.32825
ENSMUSG00000072761	Gm6712
ENSMUSG00000073077	134.014	0.45349	0.150389	3.01545	0.00256597	0.0455332	1.34167
ENSMUSG00000073158	9030624G23Rik
ENSMUSG00000073184	Gm10479
ENSMUSG00000073197	5730507C01Rik
ENSMUSG00000073274	452.954	0.478803	0.108859	4.39839	1.09057e-05	0.000474108	3.32412
ENSMUSG00000073409	20.5055	2.54578	0.500593	5.08553	3.66601e-07	2.21643e-05	4.65435
ENSMUSG00000073411	3724.78	0.500386	0.0602087	8.31086	9.50098e-17	1.92879e-14	13.7147
ENSMUSG00000073418	2725.55	2.91791	0.10529	27.7129	4.87584e-169	1.07893e-164	163.967
ENSMUSG00000073421	41.3392	0.84383	0.240698	3.50576	0.00045531	0.0120045	1.92066
ENSMUSG00000073452	Zfp97
ENSMUSG00000073489	81.4135	2.6618	0.217368	12.2456	1.77396e-34	1.09039e-31	30.9624
ENSMUSG00000073490	44.8726	2.1586	0.323869	6.66503	2.64617e-11	2.94244e-09	8.53129
ENSMUSG00000073491	48.0349	2.77558	0.356017	7.79621	6.37964e-15	1.06142e-12	11.9741
ENSMUSG00000073528	75.5216	-0.857948	0.235555	-3.64224	0.000270275	0.00787964	2.10349
ENSMUSG00000073555	64.3922	2.61795	0.27855	9.39849	5.53527e-21	1.61164e-18	17.7927
ENSMUSG00000073565	566.307	-0.476646	0.143609	-3.31904	0.000903261	0.0209073	1.6797
ENSMUSG00000073590	919.819	0.884945	0.0954044	9.27573	1.76415e-20	4.81939e-18	17.317
ENSMUSG00000073902	70.1175	1.32476	0.196782	6.73211	1.67221e-11	1.91724e-09	8.71732
ENSMUSG00000073940	34.1372	1.92152	0.561181	3.42406	0.000616939	0.0153045	1.81518
ENSMUSG00000074151	119.42	2.04269	0.1665	12.2684	1.33903e-34	8.46575e-32	31.0723
ENSMUSG00000074158	9830147E19Rik
ENSMUSG00000074165	Zfp788
ENSMUSG00000074194	Zfp791
ENSMUSG00000074220	Zfp382
ENSMUSG00000074221	Zfp568
ENSMUSG00000074282	Zfp94
ENSMUSG00000074283	Zfp109
ENSMUSG00000074472	Zfp872
ENSMUSG00000074500	Zfp558
ENSMUSG00000074519	Etohi1 (Zfp971)
ENSMUSG00000074521	Gm14327
ENSMUSG00000074527	Gm14296
ENSMUSG00000074529	C330013J21Rik (Zfp972)
ENSMUSG00000074578	441.023	0.444226	0.138265	3.21286	0.0013142	0.0277751	1.55634
ENSMUSG00000074731	Zfp345
ENSMUSG00000074748	6065.1	-0.26969	0.0741814	-3.63555	0.000277385	0.00800418	2.09668
ENSMUSG00000074749	1683.16	0.283772	0.0783353	3.62253	0.000291731	0.0083373	2.07897
ENSMUSG00000074771	243.292	0.530767	0.103713	5.11766	3.09344e-07	1.89616e-05	4.72212
ENSMUSG00000074785	1734.34	0.334033	0.0704083	4.74423	2.093e-06	0.000108974	3.96268
ENSMUSG00000074824	Rslcan18
ENSMUSG00000074829	2010315B03Rik
ENSMUSG00000074830	Zfp640
ENSMUSG00000074832	2410141K09Rik (Zfp998)
ENSMUSG00000074860	Gm10778
ENSMUSG00000074863	621.906	0.415533	0.0729387	5.69702	1.21919e-08	9.81023e-07	6.00832
ENSMUSG00000074872	96.1552	0.811188	0.22435	3.61573	0.000299505	0.00850763	2.07019
ENSMUSG00000074887	EU599041
ENSMUSG00000074896	1276.48	2.10168	0.17199	12.2198	2.43618e-34	1.45697e-31	30.8366
ENSMUSG00000075020	478.777	-0.837035	0.226106	-3.70196	0.000213942	0.00642348	2.19223
ENSMUSG00000075266	37.1533	-1.04985	0.246183	-4.2645	2.00349e-05	0.000807528	3.09284
ENSMUSG00000075437	18.5178	1.01565	0.320712	3.16686	0.00154093	0.0313594	1.50363
ENSMUSG00000076439	1308.45	-0.375219	0.11008	-3.40862	0.000652929	0.016	1.79588
ENSMUSG00000076441	322.538	0.639334	0.165328	3.86705	0.000110158	0.00372717	2.42862
ENSMUSG00000076609	10.114	2.77579	0.803756	3.45352	0.000553318	0.014025	1.8531
ENSMUSG00000077167	1072.82	0.65059	0.174446	3.72947	0.00019188	0.00584838	2.23296
ENSMUSG00000078161	1507.02	0.268628	0.0864542	3.10717	0.0018889	0.0366593	1.43582
ENSMUSG00000078435	AU041133
ENSMUSG00000078436	Gm4767
ENSMUSG00000078437	Gm3055
ENSMUSG00000078495	Gm13157 (Zfp984)
ENSMUSG00000078496	Gm13152 (Zfp982)
ENSMUSG00000078497	Gm13145 (Zfp978)
ENSMUSG00000078498	Gm13151 (Zfp988)
ENSMUSG00000078499	Rex2
ENSMUSG00000078500	Gm13235 (Zfp986)
ENSMUSG00000078502	Gm13212 (Zfp268)
ENSMUSG00000078503	Gm13225 (Zfp990)
ENSMUSG00000078532	909.474	-0.253308	0.0809494	-3.12921	0.00175276	0.0345676	1.46133
ENSMUSG00000078546	2210404O09Rik
ENSMUSG00000078564	Gm9631
ENSMUSG00000078580	E430018J23Rik
ENSMUSG00000078607	175.169	0.618038	0.125471	4.92575	8.4038e-07	4.74386e-05	4.32387
ENSMUSG00000078768	Zfp566
ENSMUSG00000078779	Zfp59
ENSMUSG00000078853	244.271	2.00312	0.197462	10.1443	3.51239e-24	1.17761e-21	20.929
ENSMUSG00000078861	Zfp931
ENSMUSG00000078862	Gm14326
ENSMUSG00000078863	Gm14325
ENSMUSG00000078864	Gm14322
ENSMUSG00000078865	Gm14406
ENSMUSG00000078867	Gm14418
ENSMUSG00000078868	Gm14412
ENSMUSG00000078870	Gm14410
ENSMUSG00000078872	Gm14401
ENSMUSG00000078875	Gm14419
ENSMUSG00000078876	Gm14408
ENSMUSG00000078877	Gm14295
ENSMUSG00000078878	Gm14305
ENSMUSG00000078879	Gm14306 (Zfp973)
ENSMUSG00000078880	Gm14308
ENSMUSG00000078881	Gm14434
ENSMUSG00000078882	Gm14431 (Zfp967)
ENSMUSG00000078883	Gm14430
ENSMUSG00000078884	Gm14436
ENSMUSG00000078885	Gm14432
ENSMUSG00000078886	Gm2026
ENSMUSG00000078887	Gm6710
ENSMUSG00000078888	Gm2007
ENSMUSG00000078889	Gm14288
ENSMUSG00000078890	Gm11007
ENSMUSG00000078891	Gm11008
ENSMUSG00000078893	Gm2004
ENSMUSG00000078894	2210418O10Rik
ENSMUSG00000078895	Gm11009
ENSMUSG00000078896	Gm8923 (Zfp965)
ENSMUSG00000078897	Gm4724
ENSMUSG00000078898	Gm4723 (Zfp968)
ENSMUSG00000078899	Gm4631
ENSMUSG00000078901	Gm14440
ENSMUSG00000078902	Gm14443
ENSMUSG00000078903	Gm14391
ENSMUSG00000078905	Gm14393
ENSMUSG00000078906	Gm14444
ENSMUSG00000078920	56.5644	0.815062	0.256776	3.17422	0.00150241	0.0306789	1.51316
ENSMUSG00000078921	86.1264	1.11145	0.254327	4.37016	1.24156e-05	0.000533459	3.2729
ENSMUSG00000078922	50.883	1.35514	0.277241	4.88794	1.01899e-06	5.62299e-05	4.25003
ENSMUSG00000078942	32.0434	1.09466	0.263952	4.14718	3.3659e-05	0.00129532	2.88762
ENSMUSG00000078945	89.5425	1.54915	0.188257	8.22893	1.88892e-16	3.60328e-14	13.4433
ENSMUSG00000078994	Zfp429
ENSMUSG00000078995	Zfp456
ENSMUSG00000079008	Gm14124
ENSMUSG00000079009	Gm14139
ENSMUSG00000079017	90.7981	2.80637	0.256178	10.9548	6.30514e-28	2.63245e-25	24.5796
ENSMUSG00000079057	453.739	0.356991	0.100054	3.568	0.000359713	0.00992423	2.0033
ENSMUSG00000079084	4115.34	0.358638	0.0534787	6.70619	1.99777e-11	2.27869e-09	8.64231
ENSMUSG00000079293	197.097	3.92976	0.175796	22.3542	1.10001e-110	1.21705e-106	105.915
ENSMUSG00000079419	35.1639	1.75502	0.272451	6.44162	1.18204e-10	1.24553e-08	7.90465
ENSMUSG00000079434	40.3763	-1.10646	0.264715	-4.17983	2.91723e-05	0.00113649	2.94444
ENSMUSG00000079445	13.1901	-1.58878	0.436363	-3.64096	0.000271618	0.00790838	2.10191
ENSMUSG00000079491	41.6207	0.950857	0.22255	4.27256	1.93245e-05	0.000784653	3.10532
ENSMUSG00000079547	33.8581	1.23824	0.275478	4.49489	6.96075e-06	0.000320224	3.49455
ENSMUSG00000079598	2515.41	-0.403779	0.0655581	-6.1591	7.31597e-10	6.91828e-08	7.16
ENSMUSG00000079697	Gm5751
ENSMUSG00000079699	Gm6592
ENSMUSG00000079701	Ssxb3
ENSMUSG00000079703	Ssxb8
ENSMUSG00000079704	Gm14459
ENSMUSG00000079705	Ssxb1
ENSMUSG00000080365	1183.34	0.481709	0.155181	3.10418	0.0019081	0.0368012	1.43414
ENSMUSG00000080717	B230307C23Rik
ENSMUSG00000082292	19.6488	1.44695	0.391417	3.6967	0.000218424	0.00654918	2.18381
ENSMUSG00000082570	144.419	0.450346	0.131519	3.42419	0.00061663	0.0153045	1.81518
ENSMUSG00000083218	15.9026	1.29657	0.363007	3.57175	0.0003546	0.00983281	2.00732
ENSMUSG00000085241	143.43	0.355087	0.118946	2.98527	0.00283327	0.0488657	1.311
ENSMUSG00000085379	206.171	-0.389299	0.111536	-3.49035	0.000482391	0.0125433	1.90159
ENSMUSG00000085457	251.305	0.30169	0.0977358	3.08679	0.00202333	0.0380716	1.4194
ENSMUSG00000085527	96.9231	-0.538634	0.151089	-3.56502	0.000363823	0.0100133	1.99942
ENSMUSG00000085795	138.655	-0.61294	0.140674	-4.35715	1.31764e-05	0.000562873	3.24959
ENSMUSG00000086022	47.0854	1.19218	0.228741	5.21192	1.86899e-07	1.19529e-05	4.92253
ENSMUSG00000086040	778.286	-0.348878	0.106782	-3.2672	0.00108616	0.0241553	1.61699
ENSMUSG00000086147	Gm13150 (Zfp989)
ENSMUSG00000086290	392.415	0.332481	0.0880776	3.77486	0.000160095	0.00503207	2.29825
ENSMUSG00000086311	27.1376	-1.43127	0.346318	-4.13281	3.58355e-05	0.00136955	2.86342
ENSMUSG00000086324	28.488	-1.48379	0.447935	-3.31251	0.000924633	0.0212906	1.67181
ENSMUSG00000086496	519.564	-0.279308	0.0934036	-2.99033	0.00278672	0.048213	1.31684
[truncated: 167 more rows]

## Sheet: SCYM
Gene	baseMean	log2FoldChange	lfcSE	stat	pvalue	padj	Volcano FDR
[truncated: 1,070 more rows]

[truncated: 4 more sheets: SCMMIF, SCYO, SCOOIF, Sheet1]
