# Supplementary material for: Intermittent fasting attenuates CNS inflammaging - rebalancing the transposonome
Source: Research Square preprint supplement (doi:10.21203/rs.3.rs-6165725/v1), 2025-03-12
Supplement: Supplementary file 4 [file bfe643fad534708386af55c6.docx]

**Supplemental Figures**

## ***Figure S1***

**
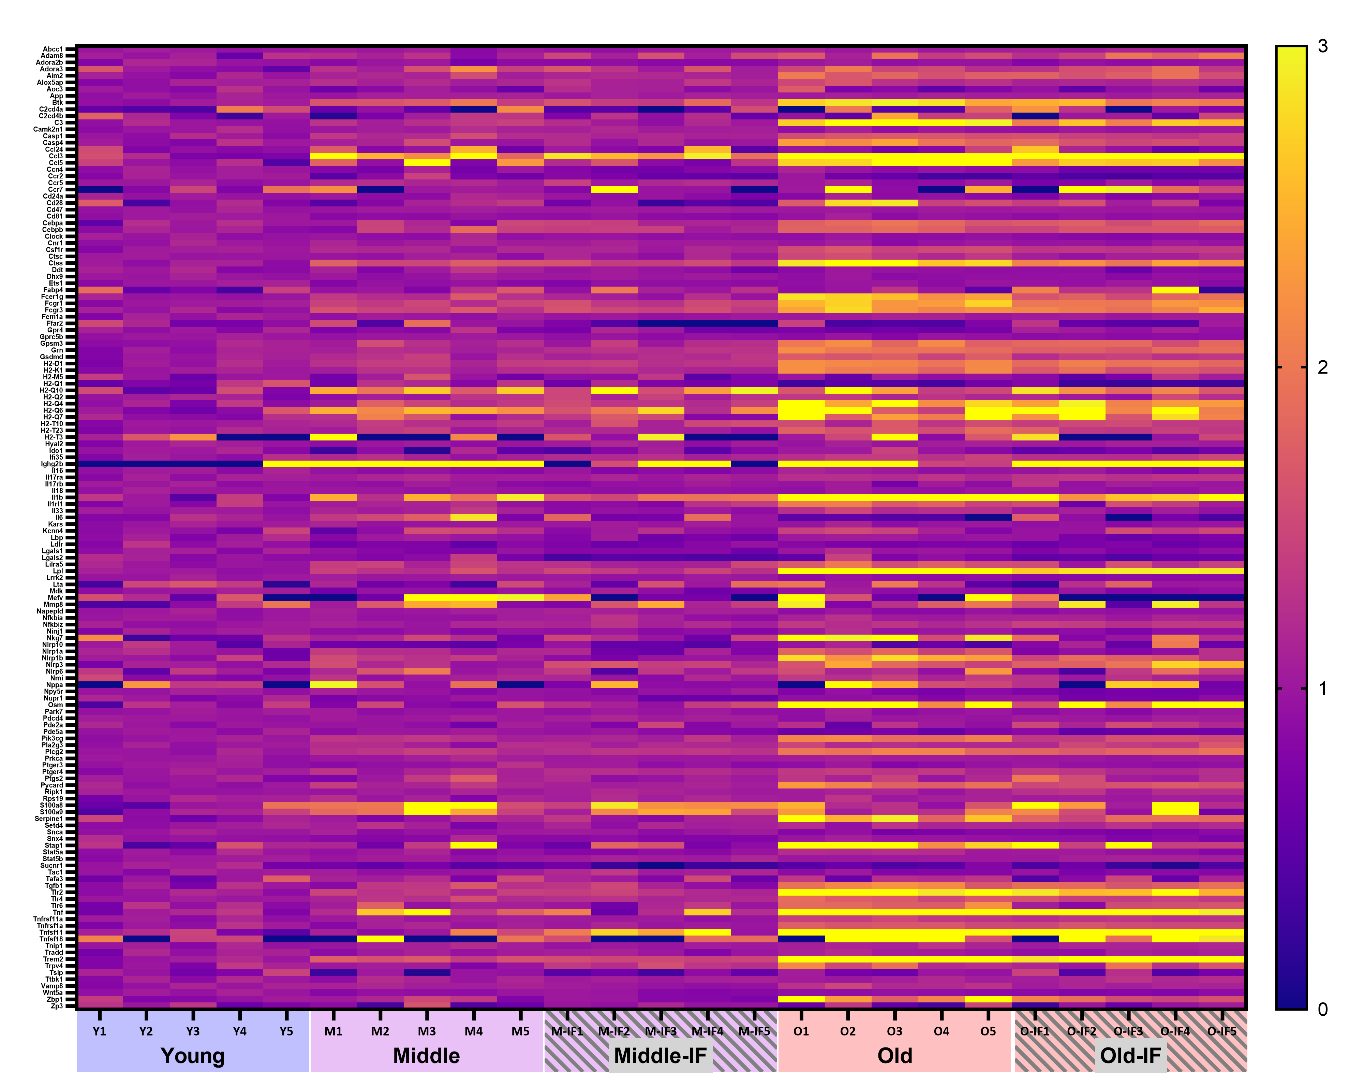
**

**Figure S1: Pro-inflammatory genes in aging spinal cord with intermittent fasting.** Heatmap of positive regulation of inflammatory response genes (GO:0050729) in aging spinal cord in animals subject to lifelong intermittent fasting (IF). Expression is represented as a fold change relative to the young average, with a maximum expression of linear 3-fold for scaling.

## ***Figure S2***


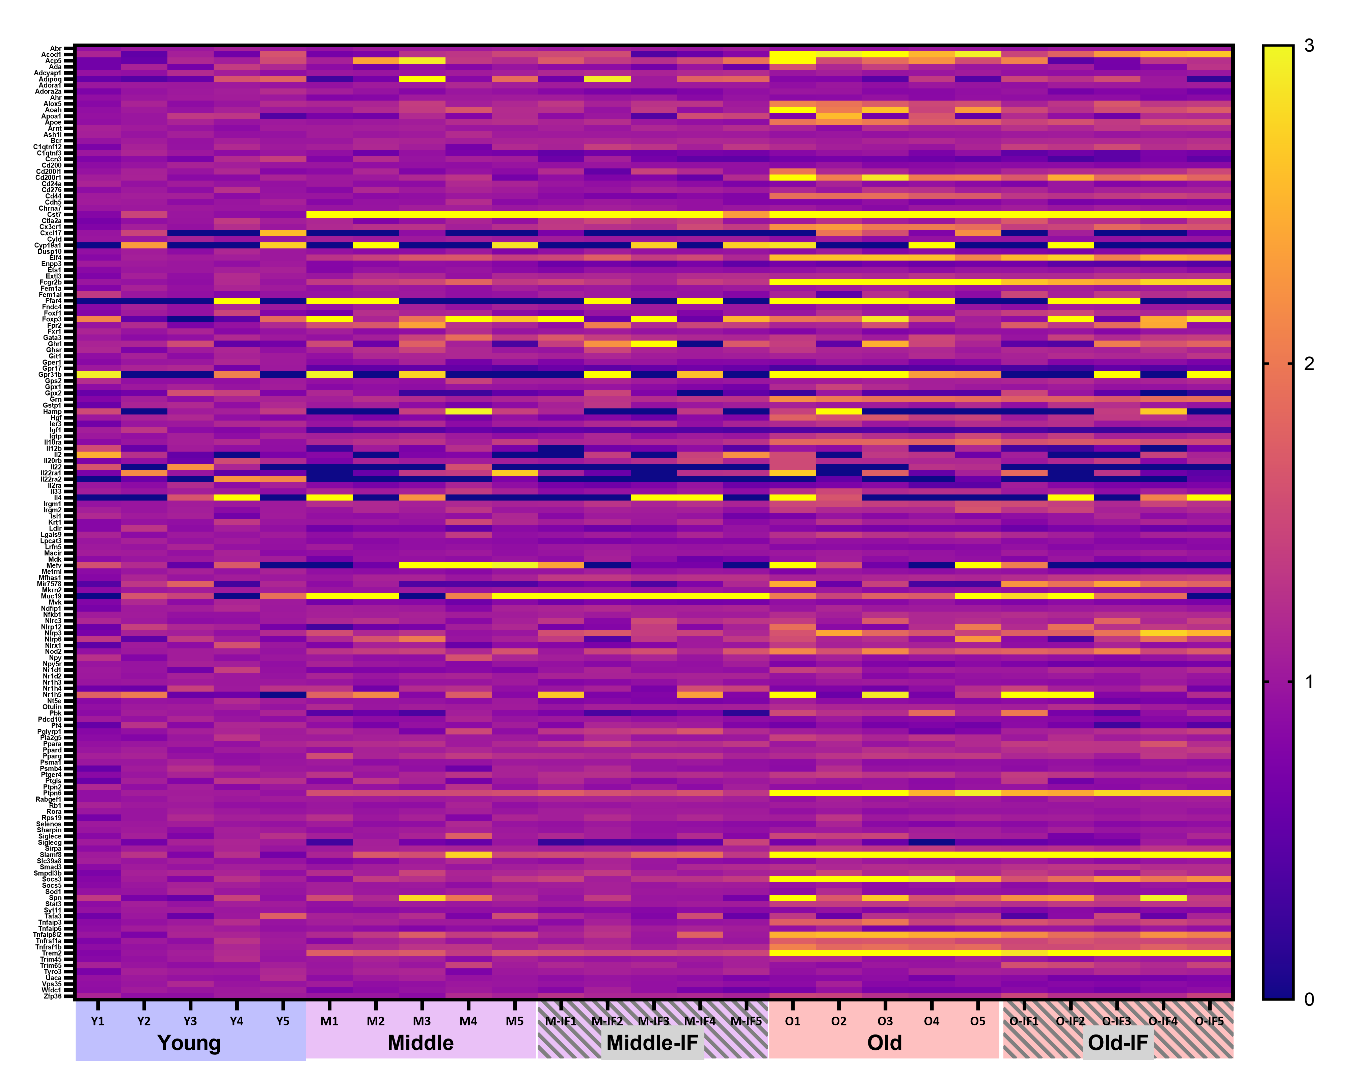


**Figure S2: Anti-inflammatory genes in aging spinal cord with intermittent fasting.** Heatmap of negative regulation of inflammatory response genes (GO:0050728) in aging spinal cord in animals subject to lifelong intermittent fasting (IF). Expression is represented as a fold change relative to the young average, with a maximum expression of linear 3-fold for scaling.

## ***Figure S3***


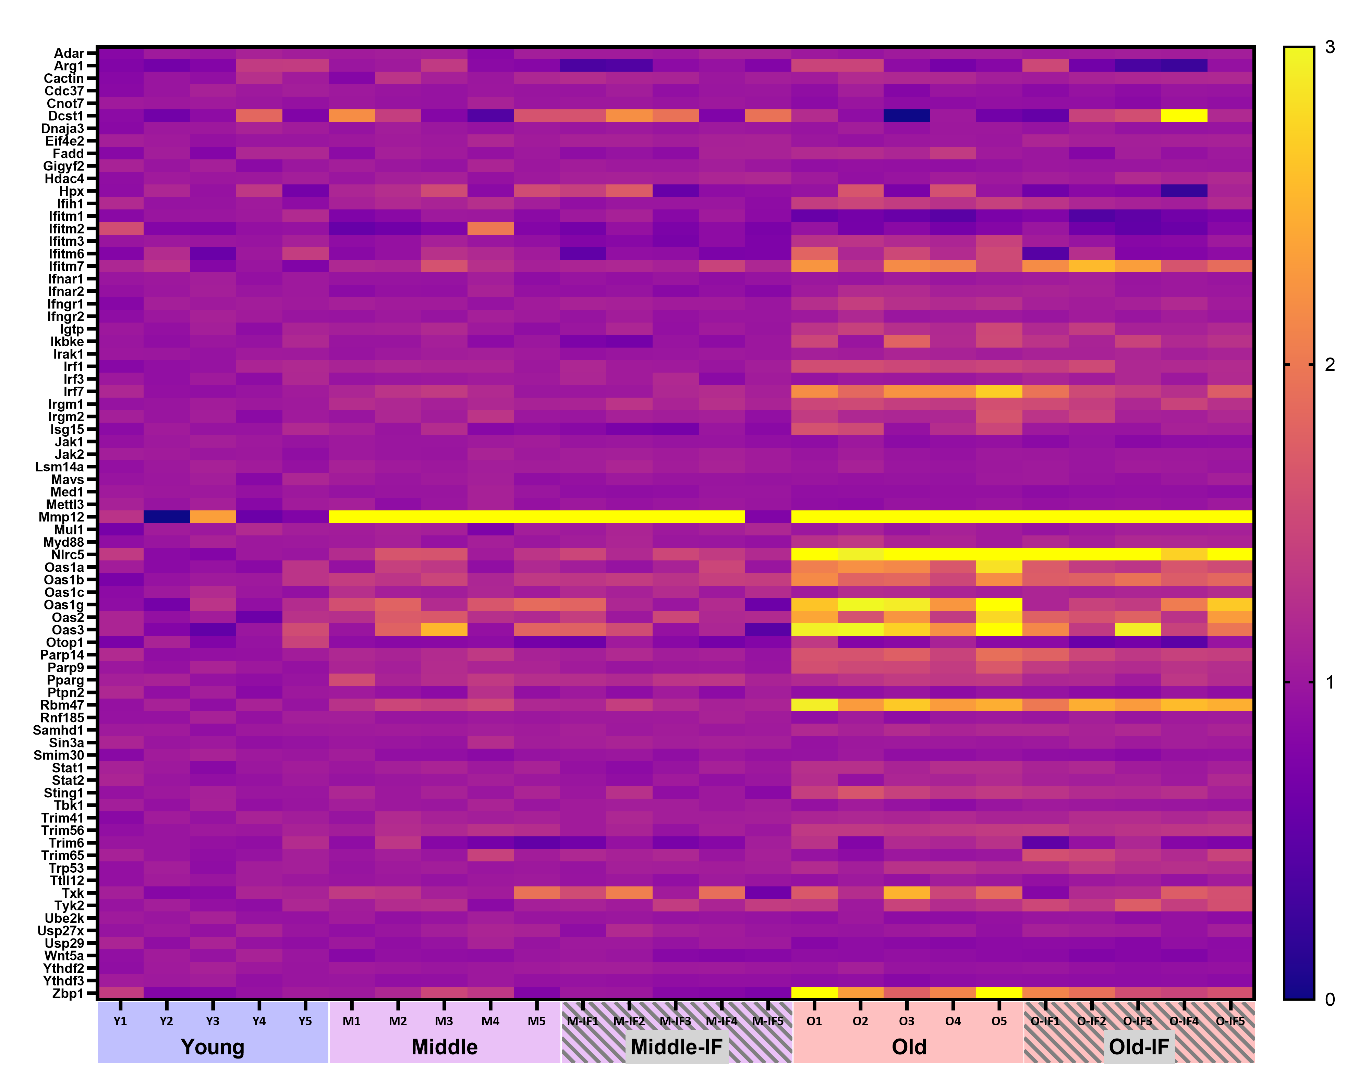


**Figure S3: Interferon signalling genes in aging spinal cord with intermittent fasting.** Heatmap of interferon-mediated signalling pathway genes (GO:0140888) in aging spinal cord in animals subject to lifelong intermittent fasting (IF). Expression is represented as a fold change relative to the young average, with a maximum expression of linear 3-fold for scaling.

## ***Figure S4***


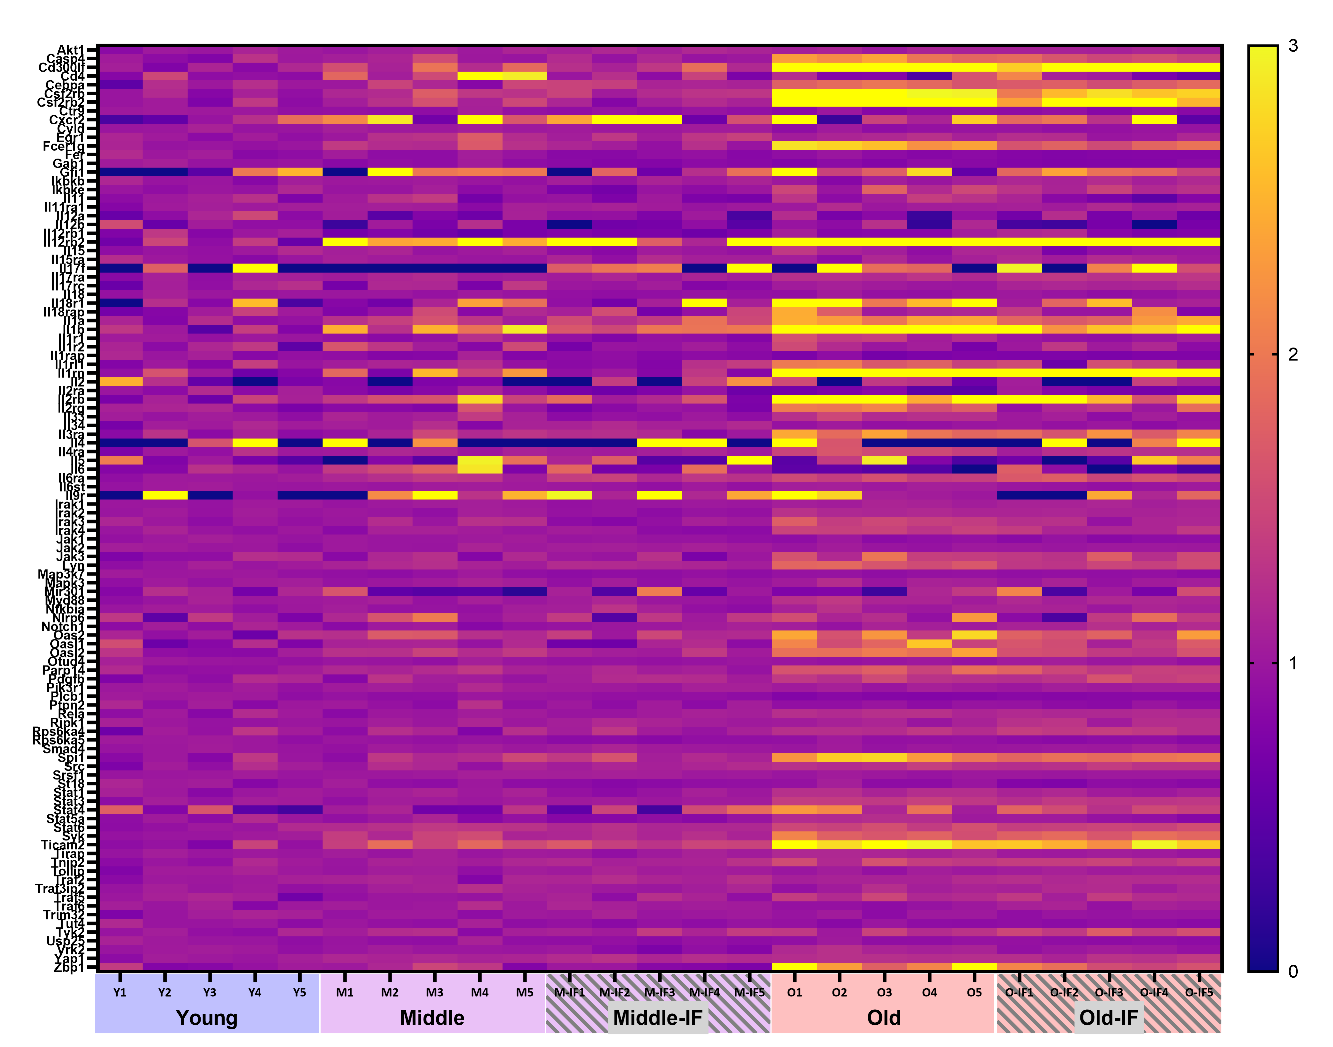


**Figure S4: Interleukin signalling genes in** **aging spinal cord with intermittent fasting.** Heatmap of interleukin-mediated signalling pathway genes (GO:0038154, GO:0035722, GO:0035772, GO:0035723, GO:0038173, GO:0097400, GO:0035655, GO:0070498, GO:0038155, GO:0070106, GO:0038110, GO:0038172, GO:0061514, GO:0038156, GO:0035771, GO:0038043, GO:0070102, GO:0038112, GO:0038113) in aging spinal cord in animals subject to lifelong intermittent fasting (IF). Expression is represented as a fold change relative to the young average, with a maximum expression of linear 3-fold for scaling.

## ***Figure S5***


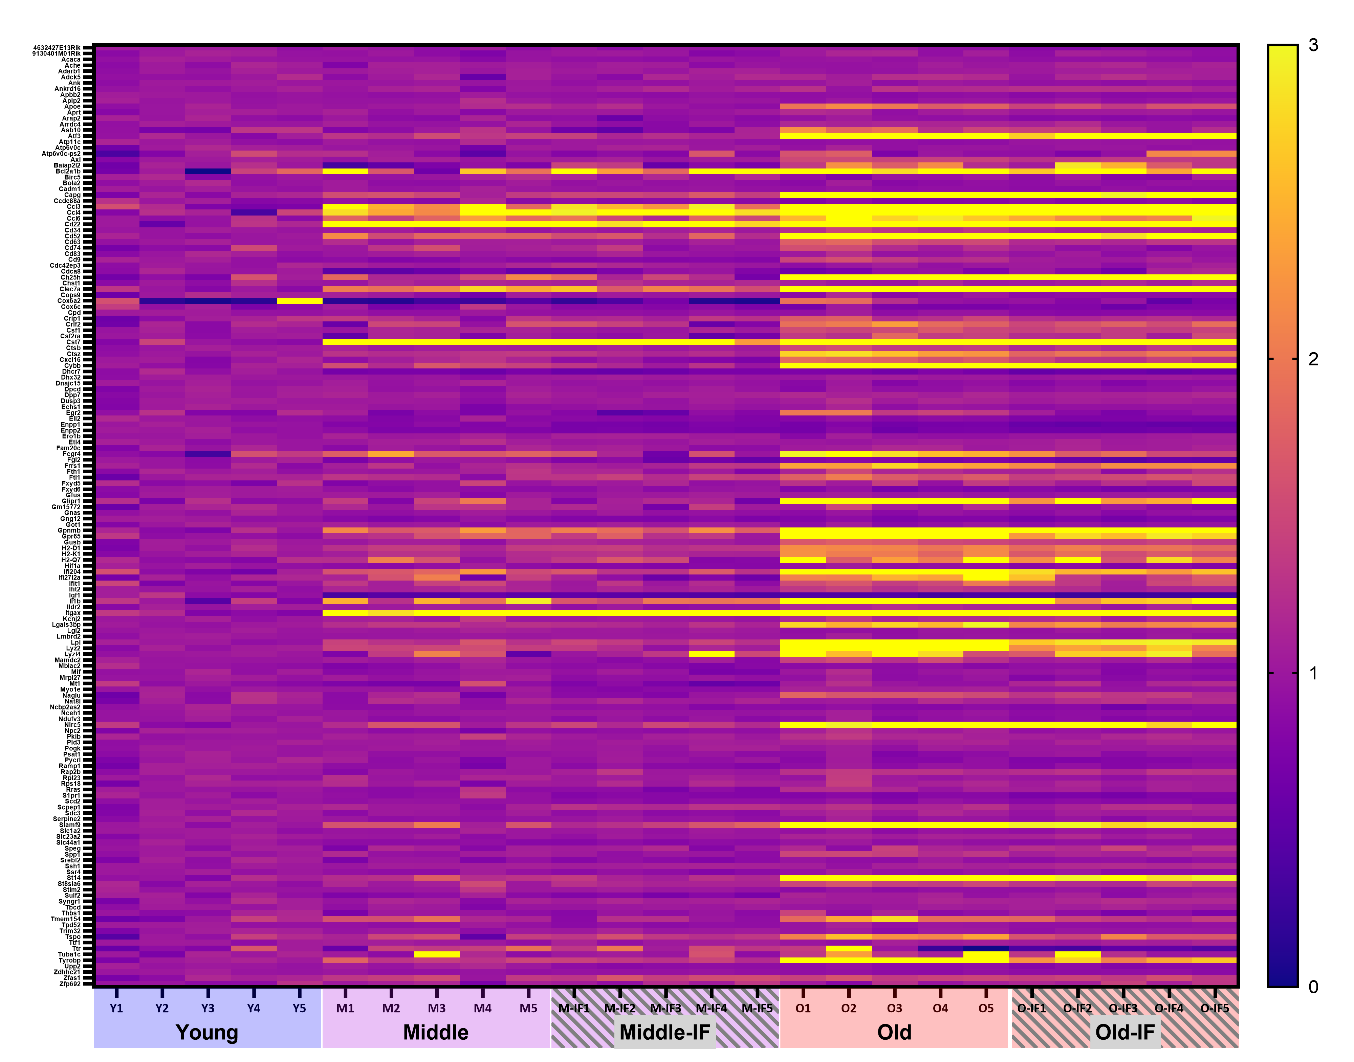


**Figure S5: Disease-associated microglia (DAM) genes in aging spinal cord with intermittent fasting.** Heatmap of DAM genes (Sobue *et al.* 2021) in aging spinal cord in animals subject to lifelong intermittent fasting (IF). Expression is represented as a fold change relative to the young average, with a maximum expression of linear 3-fold for scaling.

## ***Figure S6***


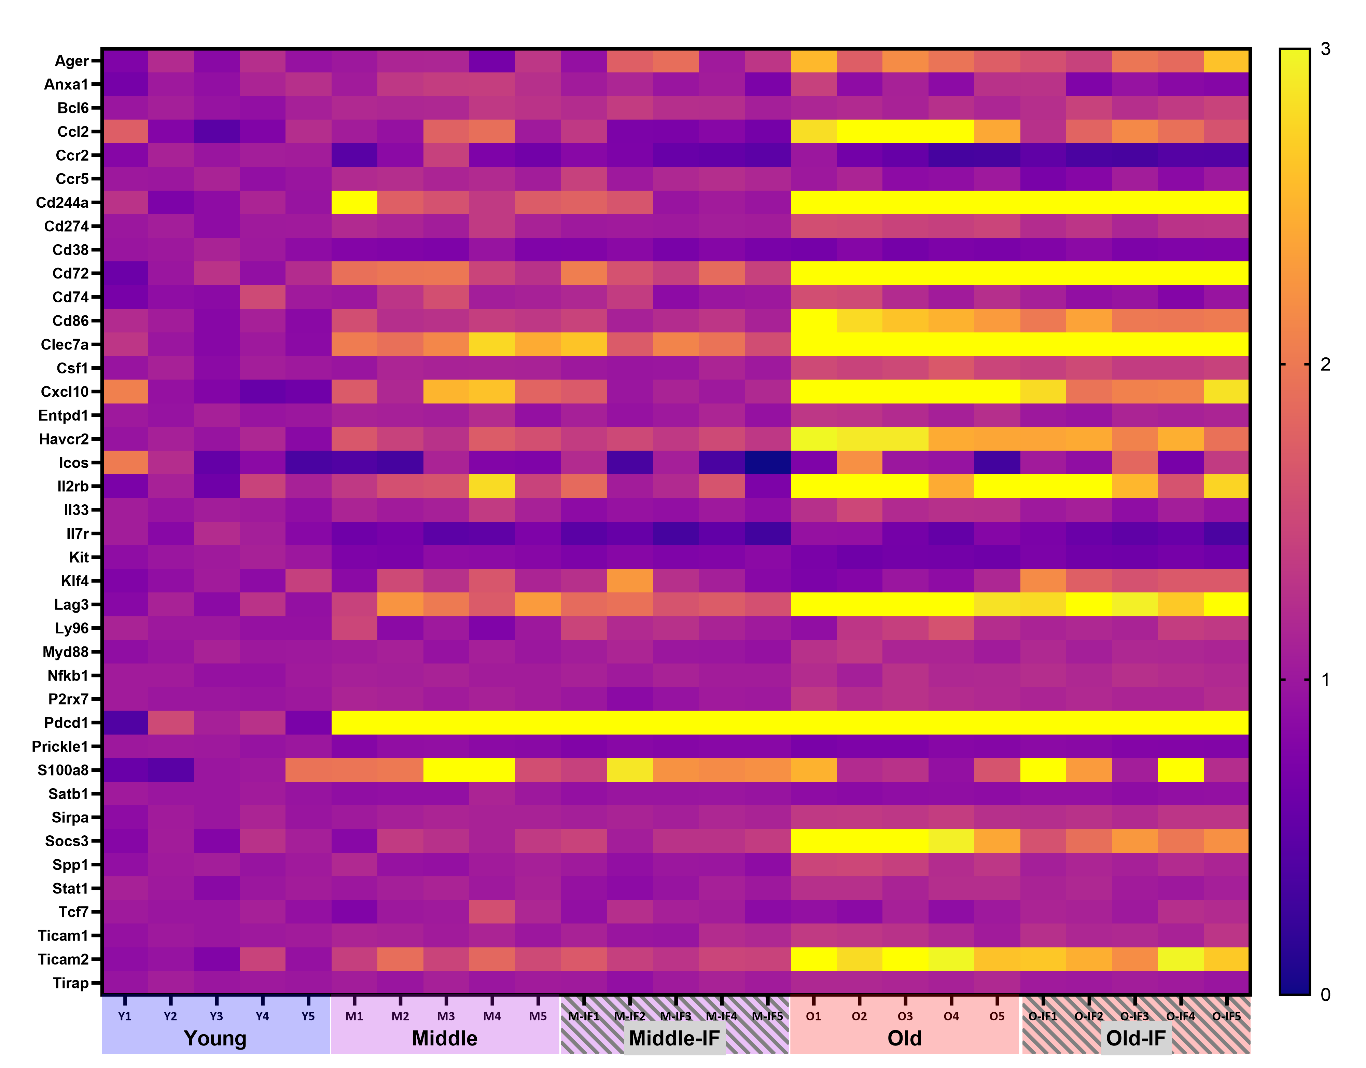


**Figure S6: Microglial exhaustion genes in aging CNS.** Heatmap of microglial phagocytic exhaustion genes (Bido *et al.* 2021) in aging spinal cord in animals subject to lifelong intermittent fasting (IF). Expression is represented as a fold change relative to the young average, with a maximum expression of linear 3-fold for scaling.

## ***Figure S7***


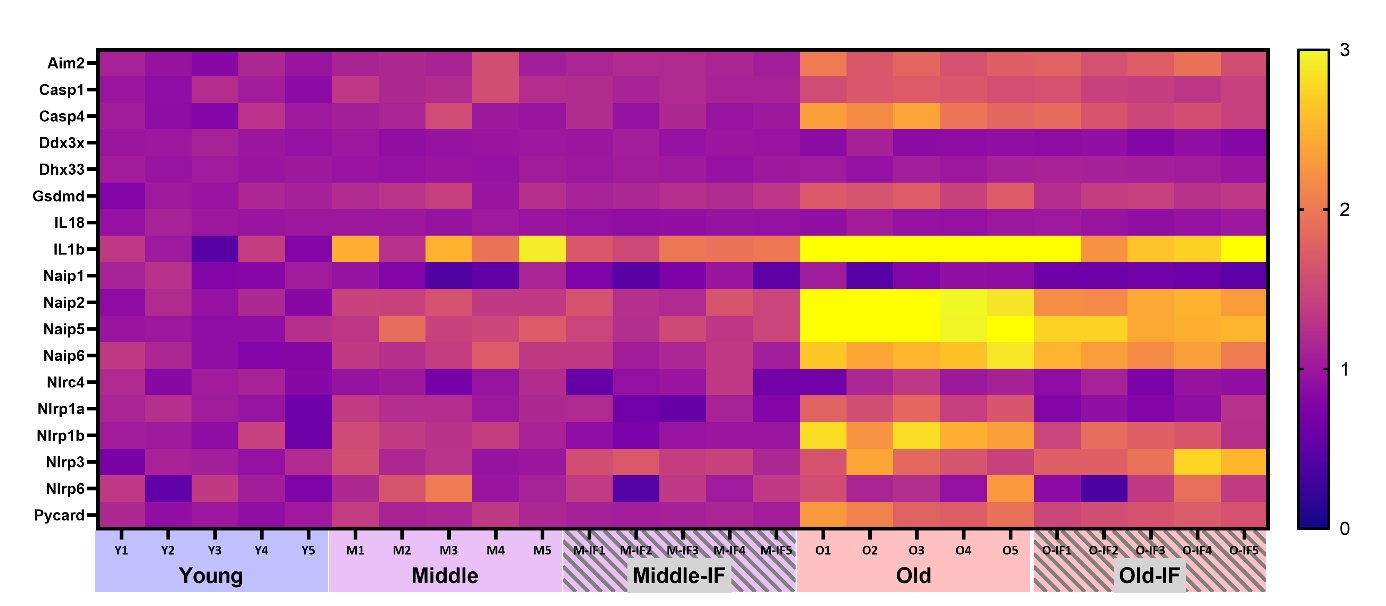


**Figure S7: Inflammasome genes in aging spinal cord with intermittent fasting.** Heatmap of inflammasome genes in aging spinal cord in animals subject to lifelong intermittent fasting (IF). Expression is represented as a fold change relative to the young average, with a maximum expression of linear 3-fold for scaling.

## ***Figure S8***


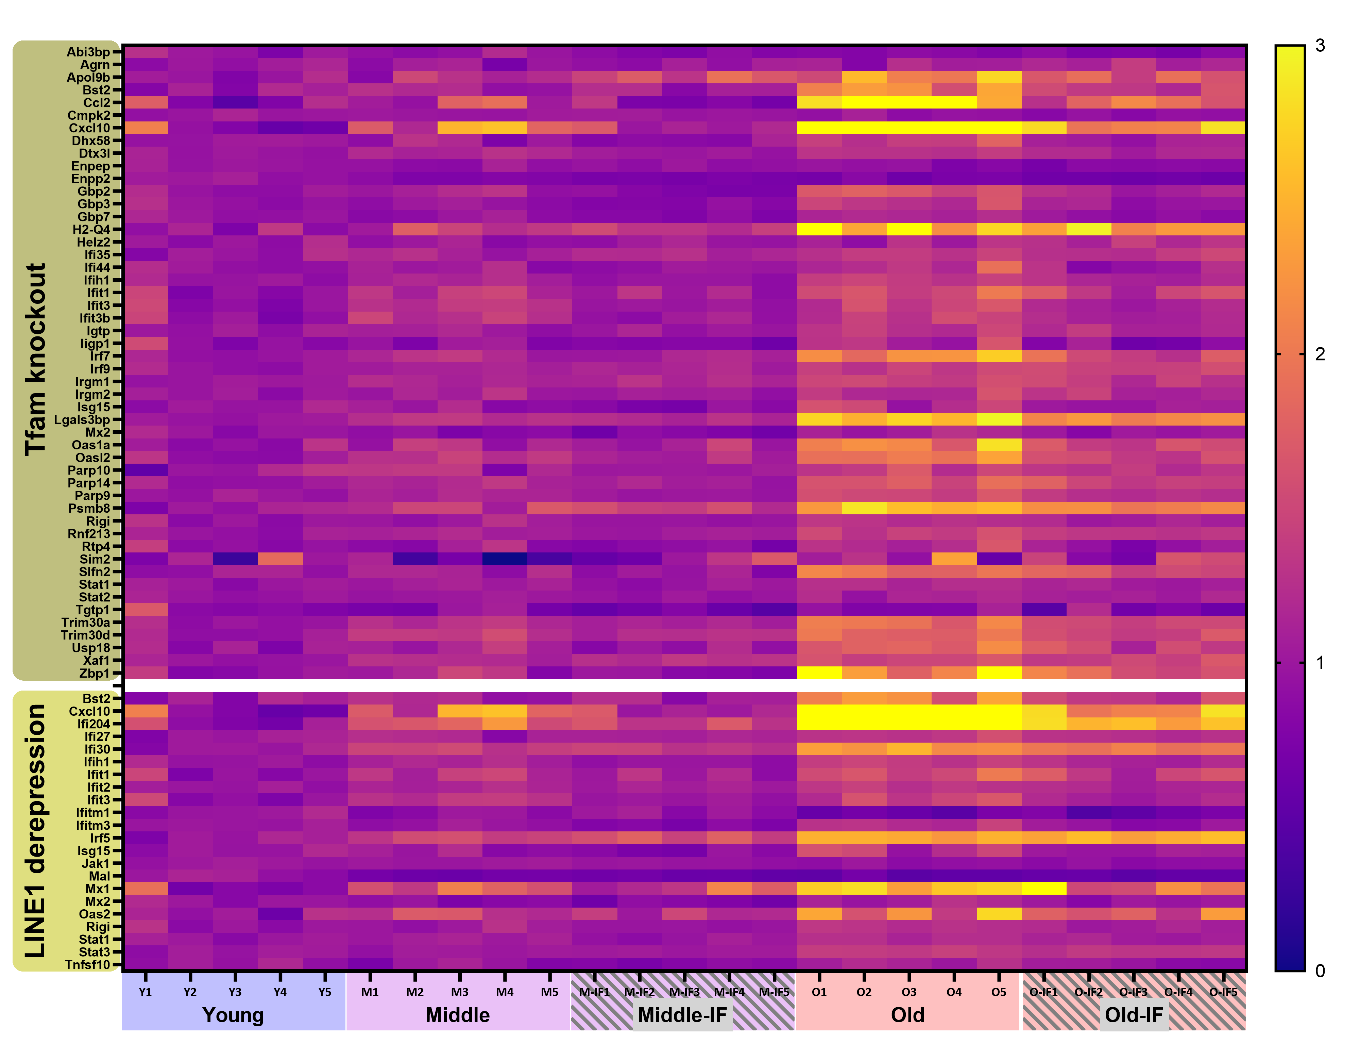


**Figure S8: Response to cytoplasmic DNA in aging CNS.** Heatmap of genes expressed in the Tfam knockout (Lei *et al.* 2023) and LINE1 derepression (De Cecco *et al.* 2019) contexts in aging spinal cord in animals subject to lifelong intermittent fasting (IF). Expression is represented as a fold change relative to the young average, with a maximum expression of linear 3-fold for scaling.

## ***Figure S9***


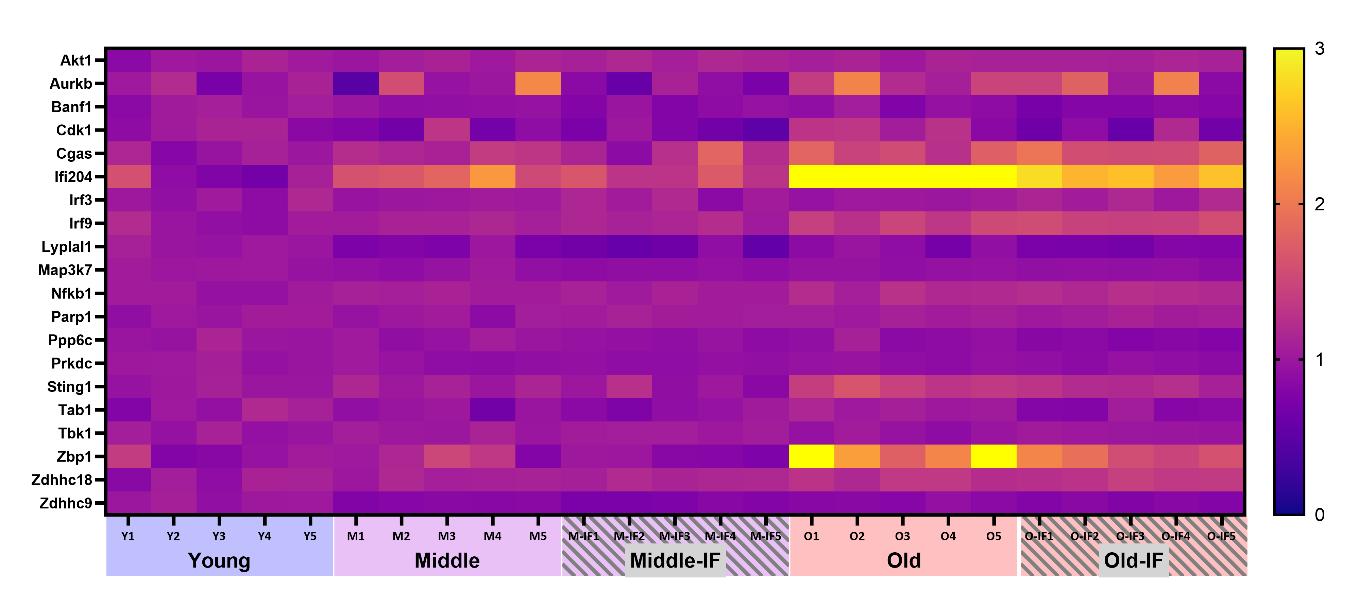


**Figure S9: cGAS-STING genes in aging spinal cord with intermittent fasting.** Heatmap of cGAS-STING in aging spinal cord in animals subject to lifelong intermittent fasting (IF). Expression is represented as a fold change relative to the young average, with a maximum expression of linear 3-fold for scaling.
