# Supplementary material for: Intermittent fasting attenuates CNS inflammaging - rebalancing the transposonome
Source: Research Square preprint supplement (doi:10.21203/rs.3.rs-6165725/v1), 2025-03-12
Supplement: Supplementary file 5 [file fdcba62b3e7730211a931dbc.xlsx]

## Sheet: CTX YvM
DESeq2		edgeR		Cuffdiff		Consensus	Name
ENSMUSG00000109006		ENSMUSG00000109006		ENSMUSG00000000031		ENSMUSG00000000531	Grasp
ENSMUSG00000103332		ENSMUSG00000051242		ENSMUSG00000000531		ENSMUSG00000000792	Slc5a5
ENSMUSG00000020891		ENSMUSG00000090667		ENSMUSG00000000792		ENSMUSG00000001227	Sema6b
ENSMUSG00000051242		ENSMUSG00000113342		ENSMUSG00000001227		ENSMUSG00000001506	Col1a1
ENSMUSG00000009075		ENSMUSG00000009075		ENSMUSG00000001506		ENSMUSG00000001663	Gstt1
ENSMUSG00000041828		ENSMUSG00000115529		ENSMUSG00000001663		ENSMUSG00000002763	Pex6
ENSMUSG00000115529		ENSMUSG00000078502		ENSMUSG00000002763		ENSMUSG00000005397	Nid1
ENSMUSG00000090667		ENSMUSG00000103332		ENSMUSG00000003934		ENSMUSG00000007682	Dio2
ENSMUSG00000009376		ENSMUSG00000041596		ENSMUSG00000004366		ENSMUSG00000009075	Cabp7
ENSMUSG00000087620		ENSMUSG00000041828		ENSMUSG00000004951		ENSMUSG00000009376	Met
ENSMUSG00000078502		ENSMUSG00000020891		ENSMUSG00000005397		ENSMUSG00000011256	Adam19
ENSMUSG00000045498		ENSMUSG00000093773		ENSMUSG00000007617		ENSMUSG00000013523	Bcas1
ENSMUSG00000103793		ENSMUSG00000009376		ENSMUSG00000007682		ENSMUSG00000013858	Tmem259
ENSMUSG00000076441		ENSMUSG00000069265		ENSMUSG00000009075		ENSMUSG00000016763	Scube1
ENSMUSG00000025888		ENSMUSG00000025888		ENSMUSG00000009376		ENSMUSG00000017400	Stac2
ENSMUSG00000051599		ENSMUSG00000076441		ENSMUSG00000011256		ENSMUSG00000018451	6330403K07Rik
ENSMUSG00000041608		ENSMUSG00000043439		ENSMUSG00000013523		ENSMUSG00000020396	Nefh
ENSMUSG00000090071		ENSMUSG00000028222		ENSMUSG00000013858		ENSMUSG00000020486	Sept4
ENSMUSG00000103897		ENSMUSG00000056999		ENSMUSG00000016763		ENSMUSG00000020732	Rab37
ENSMUSG00000069662		ENSMUSG00000044847		ENSMUSG00000017400		ENSMUSG00000020734	Grin2c
ENSMUSG00000044847		ENSMUSG00000090071		ENSMUSG00000018339		ENSMUSG00000020810	Cygb
ENSMUSG00000076431		ENSMUSG00000090061		ENSMUSG00000018451		ENSMUSG00000020891	Alox8
ENSMUSG00000028222		ENSMUSG00000051599		ENSMUSG00000020396		ENSMUSG00000021214	Akr1c18
ENSMUSG00000093773		ENSMUSG00000027356		ENSMUSG00000020486		ENSMUSG00000022076	Klhl1
ENSMUSG00000090061		ENSMUSG00000045498		ENSMUSG00000020732		ENSMUSG00000022416	Cacna1i
ENSMUSG00000026414		ENSMUSG00000043557		ENSMUSG00000020734		ENSMUSG00000022656	Nectin3
ENSMUSG00000045876		ENSMUSG00000103793		ENSMUSG00000020810		ENSMUSG00000024810	Il33
ENSMUSG00000043439		ENSMUSG00000069662		ENSMUSG00000020891		ENSMUSG00000025128	Bhlhe22
ENSMUSG00000069265		ENSMUSG00000026414		ENSMUSG00000021203		ENSMUSG00000026043	Col3a1
ENSMUSG00000051678		ENSMUSG00000100586		ENSMUSG00000021214		ENSMUSG00000026072	Il1r1
ENSMUSG00000030223		ENSMUSG00000022656		ENSMUSG00000021250		ENSMUSG00000026414	Tnnt2
ENSMUSG00000032323		ENSMUSG00000030223		ENSMUSG00000021478		ENSMUSG00000026678	Rgs5
ENSMUSG00000046743		ENSMUSG00000113121		ENSMUSG00000022076		ENSMUSG00000026712	Mrc1
ENSMUSG00000113121		ENSMUSG00000076431		ENSMUSG00000022416		ENSMUSG00000027004	Frzb
ENSMUSG00000020889		ENSMUSG00000046743		ENSMUSG00000022656		ENSMUSG00000027199	Gatm
ENSMUSG00000031170		ENSMUSG00000113651		ENSMUSG00000023067		ENSMUSG00000027358	Bmp2
ENSMUSG00000052504		ENSMUSG00000044352		ENSMUSG00000024529		ENSMUSG00000027435	Cd93
ENSMUSG00000056999		ENSMUSG00000011256		ENSMUSG00000024661		ENSMUSG00000027750	Postn
ENSMUSG00000096107		ENSMUSG00000071076		ENSMUSG00000024810		ENSMUSG00000028222	Calb1
ENSMUSG00000030256		ENSMUSG00000054716		ENSMUSG00000025128		ENSMUSG00000028804	Csmd2
ENSMUSG00000056656		ENSMUSG00000052504		ENSMUSG00000026043		ENSMUSG00000029419	Gm996
ENSMUSG00000024598		ENSMUSG00000047945		ENSMUSG00000026072		ENSMUSG00000030223	Ptpro
ENSMUSG00000017400		ENSMUSG00000031170		ENSMUSG00000026414		ENSMUSG00000030337	Vamp1
ENSMUSG00000041596		ENSMUSG00000020889		ENSMUSG00000026678		ENSMUSG00000030701	Plekhb1
ENSMUSG00000090799		ENSMUSG00000045876		ENSMUSG00000026688		ENSMUSG00000032128	Robo3
ENSMUSG00000044352		ENSMUSG00000021214		ENSMUSG00000026712		ENSMUSG00000034265	Zdhhc14
ENSMUSG00000105594		ENSMUSG00000044726		ENSMUSG00000026830		ENSMUSG00000034282	Evpl
ENSMUSG00000020732		ENSMUSG00000027199		ENSMUSG00000027004		ENSMUSG00000034686	Prr7
ENSMUSG00000021214		ENSMUSG00000024598		ENSMUSG00000027199		ENSMUSG00000034997	Htr2a
ENSMUSG00000053411		ENSMUSG00000032174		ENSMUSG00000027335		ENSMUSG00000035711	Dok3
ENSMUSG00000054716		ENSMUSG00000032323		ENSMUSG00000027358		ENSMUSG00000036264	Fstl4
ENSMUSG00000045689		ENSMUSG00000034686		ENSMUSG00000027435		ENSMUSG00000036422	Pcdh8
ENSMUSG00000116525		ENSMUSG00000042388		ENSMUSG00000027750		ENSMUSG00000036466	Megf11
ENSMUSG00000041741		ENSMUSG00000052759		ENSMUSG00000027875		ENSMUSG00000037280	Galnt6
ENSMUSG00000047945		ENSMUSG00000030256		ENSMUSG00000027971		ENSMUSG00000037541	Shank2
ENSMUSG00000041120		ENSMUSG00000020914		ENSMUSG00000028222		ENSMUSG00000038146	Notch3
ENSMUSG00000011256		ENSMUSG00000105594		ENSMUSG00000028804		ENSMUSG00000038370	Pcp4l1
ENSMUSG00000038550		ENSMUSG00000085773		ENSMUSG00000029419		ENSMUSG00000038550	Ciart
ENSMUSG00000100586		ENSMUSG00000096107		ENSMUSG00000029632		ENSMUSG00000039278	Pcsk1n
ENSMUSG00000032174		ENSMUSG00000038550		ENSMUSG00000029657		ENSMUSG00000039904	Gpr37
ENSMUSG00000086181		ENSMUSG00000022076		ENSMUSG00000030208		ENSMUSG00000040152	Thbs1
ENSMUSG00000022076		ENSMUSG00000026452		ENSMUSG00000030223		ENSMUSG00000040794	C1qtnf4
ENSMUSG00000051486		ENSMUSG00000087620		ENSMUSG00000030337		ENSMUSG00000041134	Cyyr1
ENSMUSG00000022656		ENSMUSG00000041608		ENSMUSG00000030701		ENSMUSG00000041324	Inhba
ENSMUSG00000071076		ENSMUSG00000026043		ENSMUSG00000031708		ENSMUSG00000041596	Nlrp5-ps
ENSMUSG00000030994		ENSMUSG00000030236		ENSMUSG00000031760		ENSMUSG00000041828	Abca8a
ENSMUSG00000063687		ENSMUSG00000116525		ENSMUSG00000032012		ENSMUSG00000042388	Dlgap3
ENSMUSG00000026452		ENSMUSG00000033768		ENSMUSG00000032128		ENSMUSG00000043439	Epop
ENSMUSG00000044726		ENSMUSG00000020732		ENSMUSG00000032259		ENSMUSG00000043557	Mdga1
ENSMUSG00000059182		ENSMUSG00000046229		ENSMUSG00000032517		ENSMUSG00000044352	Sowaha
ENSMUSG00000104868		ENSMUSG00000103897		ENSMUSG00000033730		ENSMUSG00000044726	Erich5
ENSMUSG00000056116		ENSMUSG00000040794		ENSMUSG00000034265		ENSMUSG00000044847	Lsm11
ENSMUSG00000113651		ENSMUSG00000051678		ENSMUSG00000034282		ENSMUSG00000046229	Scand1
ENSMUSG00000027358		ENSMUSG00000005397		ENSMUSG00000034686		ENSMUSG00000046480	Scn4b
ENSMUSG00000026179		ENSMUSG00000095562		ENSMUSG00000034892		ENSMUSG00000046607	Hrk
ENSMUSG00000004031		ENSMUSG00000020486		ENSMUSG00000034997		ENSMUSG00000046743	Fat4
ENSMUSG00000006920		ENSMUSG00000061615		ENSMUSG00000035274		ENSMUSG00000047205	Dusp18
ENSMUSG00000034686		ENSMUSG00000028763		ENSMUSG00000035711		ENSMUSG00000047907	Tshz2
ENSMUSG00000027199		ENSMUSG00000045689		ENSMUSG00000035783		ENSMUSG00000047945	Marcksl1
ENSMUSG00000060675		ENSMUSG00000000792		ENSMUSG00000036199		ENSMUSG00000049493	Pls1
ENSMUSG00000047307		ENSMUSG00000113920		ENSMUSG00000036264		ENSMUSG00000049932	H2afx
ENSMUSG00000034685		ENSMUSG00000063632		ENSMUSG00000036422		ENSMUSG00000050138	Kcnk12
ENSMUSG00000033768		ENSMUSG00000086181		ENSMUSG00000036466		ENSMUSG00000050896	Rtn4rl2
ENSMUSG00000042388		ENSMUSG00000060675		ENSMUSG00000036751		ENSMUSG00000051067	Lingo3
ENSMUSG00000052759		ENSMUSG00000040565		ENSMUSG00000037095		ENSMUSG00000051703	Tmem198
ENSMUSG00000006522		ENSMUSG00000001506		ENSMUSG00000037280		ENSMUSG00000052229	Gpr17
ENSMUSG00000031805		ENSMUSG00000050896		ENSMUSG00000037541		ENSMUSG00000052504	Epha3
ENSMUSG00000026043		ENSMUSG00000041741		ENSMUSG00000038146		ENSMUSG00000054716	Zfp771
ENSMUSG00000049932		ENSMUSG00000000531		ENSMUSG00000038370		ENSMUSG00000055639	Dach1
ENSMUSG00000044043		ENSMUSG00000101355		ENSMUSG00000038550		ENSMUSG00000056481	Cd248
ENSMUSG00000034201		ENSMUSG00000039278		ENSMUSG00000038630		ENSMUSG00000056999	Ide
ENSMUSG00000000792		ENSMUSG00000052229		ENSMUSG00000039278		ENSMUSG00000058571	Gpc6
ENSMUSG00000002341		ENSMUSG00002075524		ENSMUSG00000039904		ENSMUSG00000061482	Hist1h4d
ENSMUSG00000034768		ENSMUSG00000032128		ENSMUSG00000040152		ENSMUSG00000063632	Sox11
ENSMUSG00000032356		ENSMUSG00000030337		ENSMUSG00000040183		ENSMUSG00000067203	H2-K2
ENSMUSG00000048616		ENSMUSG00000067203		ENSMUSG00000040794		ENSMUSG00000069265	Hist1h3a
ENSMUSG00000028763		ENSMUSG00000051486		ENSMUSG00000040972		ENSMUSG00000069662	Marcks
ENSMUSG00000055633		ENSMUSG00000024810		ENSMUSG00000041134		ENSMUSG00000070601	Vmn2r84
ENSMUSG00000106644		ENSMUSG00000031494		ENSMUSG00000041324		ENSMUSG00000070705	Eid2b
ENSMUSG00000061186		ENSMUSG00000059213		ENSMUSG00000041380		ENSMUSG00000071076	Jund
ENSMUSG00000001663		ENSMUSG00000003346		ENSMUSG00000041596		ENSMUSG00000071341	Egr4
ENSMUSG00000031618		ENSMUSG00000017400		ENSMUSG00000041607		ENSMUSG00000071637	Cebpd
ENSMUSG00000040565		ENSMUSG00000056656		ENSMUSG00000041697		ENSMUSG00000076431	Sox4
ENSMUSG00000020914		ENSMUSG00000104264		ENSMUSG00000041828		ENSMUSG00000076441	Ass1
ENSMUSG00000005397		ENSMUSG00000084843		ENSMUSG00000042116		ENSMUSG00000076612	Ighg2c
ENSMUSG00000047419		ENSMUSG00000031167		ENSMUSG00000042388		ENSMUSG00000078502	Gm13212
ENSMUSG00000055067		ENSMUSG00000034685		ENSMUSG00000043439		ENSMUSG00000090061	Nwd2
ENSMUSG00000040649		ENSMUSG00000006522		ENSMUSG00000043557		ENSMUSG00000090071	Cdk5r2
ENSMUSG00000074776		ENSMUSG00000026822		ENSMUSG00000043843		ENSMUSG00000090667	Gm765
ENSMUSG00000040125		ENSMUSG00000056116		ENSMUSG00000044285		ENSMUSG00000092048	Vmn2r85
ENSMUSG00000063632		ENSMUSG00000075012		ENSMUSG00000044352		ENSMUSG00000094910	D430019H16Rik
ENSMUSG00000029004		ENSMUSG00000027358		ENSMUSG00000044726		ENSMUSG00000095041	AC149090.1
ENSMUSG00000013858		ENSMUSG00000071637		ENSMUSG00000044847		ENSMUSG00000099583	Hist1h3d
ENSMUSG00000075012		ENSMUSG00000063687		ENSMUSG00000045573		ENSMUSG00000100210	Hist1h3f
ENSMUSG00000003346		ENSMUSG00000051067		ENSMUSG00000046229		ENSMUSG00000104674	Gm42756
ENSMUSG00000085773		ENSMUSG00000058571		ENSMUSG00000046480		ENSMUSG00000105594	Gm43398
ENSMUSG00000045083		ENSMUSG00000047307		ENSMUSG00000046607		ENSMUSG00000107677	Olfr316
ENSMUSG00000073590		ENSMUSG00000001227		ENSMUSG00000046743		ENSMUSG00000109006	B230209E15Rik
ENSMUSG00000014592		ENSMUSG00000016763		ENSMUSG00000047205		ENSMUSG00000113651	Gm4900
ENSMUSG00002075524		ENSMUSG00000045083		ENSMUSG00000047907		ENSMUSG00000116081	AC165278.1
ENSMUSG00000021733		ENSMUSG00000034768		ENSMUSG00000047945		ENSMUSG00000116525	AC156026.1
ENSMUSG00000022421		ENSMUSG00000085526		ENSMUSG00000048758		ENSMUSG00000116557	4933432I09Rik
ENSMUSG00000084843		ENSMUSG00000041120		ENSMUSG00000049493		ENSMUSG00000024647	Cbln2
ENSMUSG00000085526		ENSMUSG00000049932		ENSMUSG00000049932		ENSMUSG00000025422	Agap2
ENSMUSG00000074892		ENSMUSG00000022421		ENSMUSG00000050121		ENSMUSG00000029581	Fscn1
ENSMUSG00000020486		ENSMUSG00000090799		ENSMUSG00000050138		ENSMUSG00000029675	Eln
ENSMUSG00000030236		ENSMUSG00000040125		ENSMUSG00000050896		ENSMUSG00000033717	Adra2a
ENSMUSG00000050896		ENSMUSG00000031805		ENSMUSG00000051067		ENSMUSG00000059361	Nrsn2
ENSMUSG00000030337		ENSMUSG00000113294		ENSMUSG00000051703		ENSMUSG00000066721	Zfp575
ENSMUSG00000030350		ENSMUSG00000089679		ENSMUSG00000052229		ENSMUSG00000075012	Fjx1
ENSMUSG00000040794		ENSMUSG00000074892		ENSMUSG00000052504		ENSMUSG00000097797	Gm26901
ENSMUSG00000067203		ENSMUSG00000038146		ENSMUSG00000054428		ENSMUSG00000025888	Casp1
ENSMUSG00000015846		ENSMUSG00000047205		ENSMUSG00000054716		ENSMUSG00000026676	Ccdc3
ENSMUSG00000098097		ENSMUSG00000049493		ENSMUSG00000055639		ENSMUSG00000031409	Tceal6
ENSMUSG00000000531		ENSMUSG00000034201		ENSMUSG00000056481		ENSMUSG00000034768	Asb16
ENSMUSG00000049493		ENSMUSG00000080058		ENSMUSG00000056999		ENSMUSG00000037843	Vstm2l
ENSMUSG00000038146		ENSMUSG00000036466		ENSMUSG00000057322		ENSMUSG00000040495	Chrm4
ENSMUSG00000024044		ENSMUSG00000098097		ENSMUSG00000058385		ENSMUSG00000040565	Btaf1
ENSMUSG00000059213		ENSMUSG00000074776		ENSMUSG00000058571		ENSMUSG00000045318	Adra2c
ENSMUSG00000051067		ENSMUSG00000034265		ENSMUSG00000059534		ENSMUSG00000047996	Prrg1
ENSMUSG00000044176		ENSMUSG00000055633		ENSMUSG00000059734		ENSMUSG00000056306	Sertm1
ENSMUSG00000001227		ENSMUSG00000006920		ENSMUSG00000059991		ENSMUSG00000082229	Nap1l2
ENSMUSG00000025764		ENSMUSG00000106644		ENSMUSG00000061482		ENSMUSG00000095562	Gm21887
ENSMUSG00000040274		ENSMUSG00000029661		ENSMUSG00000061762		ENSMUSG00000105891	A230001M10Rik
ENSMUSG00000053080		ENSMUSG00000036264		ENSMUSG00000061808		ENSMUSG00000002289	Angptl4
ENSMUSG00000043557		ENSMUSG00000002289		ENSMUSG00000063415		ENSMUSG00000029648	Flt1
ENSMUSG00000020810		ENSMUSG00000026179		ENSMUSG00000063457		ENSMUSG00000034317	Trim59
ENSMUSG00000022419		ENSMUSG00000104674		ENSMUSG00000063632		ENSMUSG00000084843	B230312C02Rik
ENSMUSG00000004637		ENSMUSG00000037469		ENSMUSG00000064337		ENSMUSG00000113920	Gm18783
ENSMUSG00000026042		ENSMUSG00000001663		ENSMUSG00000064339		ENSMUSG00000047632	Fgfbp3
ENSMUSG00000089679		ENSMUSG00000104868		ENSMUSG00000065701		ENSMUSG00000074576	Mocs3
ENSMUSG00000043458		ENSMUSG00000104093		ENSMUSG00000067203		ENSMUSG00000020681	Ace
ENSMUSG00000042532		ENSMUSG00000100210		ENSMUSG00000067996		ENSMUSG00000023911	Flywch2
ENSMUSG00000030209		ENSMUSG00000024647		ENSMUSG00000069265		ENSMUSG00000037428	Vgf
ENSMUSG00000033717		ENSMUSG00000105565		ENSMUSG00000069662		ENSMUSG00000041923	Nol4
ENSMUSG00000056306		ENSMUSG00000051149		ENSMUSG00000070436		ENSMUSG00000053166	Cdh22
ENSMUSG00000046808		ENSMUSG00000033717		ENSMUSG00000070601		ENSMUSG00000059213	Ddn
ENSMUSG00000104674		ENSMUSG00000055639		ENSMUSG00000070705		ENSMUSG00000070348	Ccnd1
ENSMUSG00000052229		ENSMUSG00000035270		ENSMUSG00000071076		ENSMUSG00000022096	Hr
ENSMUSG00000036466		ENSMUSG00000040274		ENSMUSG00000071234		ENSMUSG00000034164	Emid1
ENSMUSG00000104264		ENSMUSG00000028860		ENSMUSG00000071341		ENSMUSG00000039105	Atp6v1g1
ENSMUSG00000055639		ENSMUSG00000039904		ENSMUSG00000071637		ENSMUSG00000042529	Kcnj12
ENSMUSG00000031167		ENSMUSG00000029581		ENSMUSG00000074489		ENSMUSG00000050295	Foxc1
ENSMUSG00000045318		ENSMUSG00000095041		ENSMUSG00000074743		ENSMUSG00000051435	Fhad1
ENSMUSG00000061615		ENSMUSG00000056306		ENSMUSG00000076431		ENSMUSG00000055172	C1ra
ENSMUSG00000094910		ENSMUSG00000030209		ENSMUSG00000076441		ENSMUSG00000061615	Hist1h2ab
ENSMUSG00000041134		ENSMUSG00000051703		ENSMUSG00000076612		ENSMUSG00000069273	Hist1h3e
ENSMUSG00000024810		ENSMUSG00000002393		ENSMUSG00000078502		ENSMUSG00000081683	Fzd10
ENSMUSG00000044667		ENSMUSG00000026042		ENSMUSG00000079523		ENSMUSG00000025213	Kazald1
ENSMUSG00000071637		ENSMUSG00000025422		ENSMUSG00000079641		ENSMUSG00000032174	Icam5
ENSMUSG00000047205		ENSMUSG00000025128		ENSMUSG00000090061		ENSMUSG00000039474	Wfs1
ENSMUSG00000104093		ENSMUSG00000094910		ENSMUSG00000090071		ENSMUSG00000041608	Entpd3
ENSMUSG00000042529		ENSMUSG00000059187		ENSMUSG00000090223		ENSMUSG00000101355	Hist1h3h
ENSMUSG00000035270		ENSMUSG00000030350		ENSMUSG00000090667		ENSMUSG00000002083	Bbc3
ENSMUSG00000079055		ENSMUSG00000031618		ENSMUSG00000092048		ENSMUSG00000027015	Cybrd1
ENSMUSG00000029090		ENSMUSG00000022419		ENSMUSG00000093507		ENSMUSG00000087620	5330434G04Rik
ENSMUSG00000029826		ENSMUSG00000030994		ENSMUSG00000093674		ENSMUSG00000109121	Gm44644
ENSMUSG00000072966		ENSMUSG00000097178		ENSMUSG00000094910		ENSMUSG00000002012	Pnck
ENSMUSG00000024887		ENSMUSG00000114433		ENSMUSG00000095041		ENSMUSG00000014782	Plekhg4
ENSMUSG00000000957		ENSMUSG00000045318		ENSMUSG00000095098		ENSMUSG00000026822	Lcn2
ENSMUSG00000002393		ENSMUSG00000070858		ENSMUSG00000096768		ENSMUSG00000030413	Pglyrp1
ENSMUSG00000075014		ENSMUSG00000026193		ENSMUSG00000099583		ENSMUSG00000031494	Cd209a
ENSMUSG00000024647		ENSMUSG00000029419		ENSMUSG00000100210		ENSMUSG00000032911	Cspg4
ENSMUSG00000028364		ENSMUSG00000024887		ENSMUSG00000102504		ENSMUSG00000045193	Cirbp
ENSMUSG00000029084		ENSMUSG00000075014		ENSMUSG00000104674		ENSMUSG00000006411	Nectin4
ENSMUSG00000049928		ENSMUSG00000070348		ENSMUSG00000105594		ENSMUSG00000028631	Kcnq4
ENSMUSG00000058571		ENSMUSG00000022483		ENSMUSG00000107374		ENSMUSG00000060240	Cend1
ENSMUSG00000080058		ENSMUSG00000048616		ENSMUSG00000107677		ENSMUSG00000044667	Plppr4
ENSMUSG00000051527		ENSMUSG00000009551		ENSMUSG00000109006		ENSMUSG00000051652	Lrrc3
ENSMUSG00000033191		ENSMUSG00000042529		ENSMUSG00000110924		ENSMUSG00000037833	Sh2d4b
ENSMUSG00000051703		ENSMUSG00000053080		ENSMUSG00000113651		ENSMUSG00000024378	Stard4
ENSMUSG00000113920		ENSMUSG00000036422		ENSMUSG00000116081		ENSMUSG00000030350	Prmt8
ENSMUSG00000009551		ENSMUSG00000002341		ENSMUSG00000116525		ENSMUSG00000057455	Rit2
ENSMUSG00000031494		ENSMUSG00000049928		ENSMUSG00000116557		ENSMUSG00000027220	Syt13
ENSMUSG00000051149		ENSMUSG00000055067		ENSMUSG00000118790		ENSMUSG00000030256	Bhlhe41
ENSMUSG00000034265		ENSMUSG00000032356		ENSMUSG00002075795		ENSMUSG00000034341	Wbp2
ENSMUSG00000056481		ENSMUSG00000056481		ENSMUSG00002076601		ENSMUSG00000034612	Chst11
ENSMUSG00000033740		ENSMUSG00000042286		ENSMUSG00000014786		ENSMUSG00000039059	Hrh3
ENSMUSG00000040867		ENSMUSG00000040152		ENSMUSG00000023832		ENSMUSG00000097604	Gm17322
ENSMUSG00000002763		ENSMUSG00000059182		ENSMUSG00000024647		ENSMUSG00000036620	Mgat4b
ENSMUSG00000051550		ENSMUSG00000020810		ENSMUSG00000025422		ENSMUSG00000056656	Apol8
ENSMUSG00000028860		ENSMUSG00000029675		ENSMUSG00000026385		ENSMUSG00000002341	Ncan
ENSMUSG00000064225		ENSMUSG00000061186		ENSMUSG00000029581		ENSMUSG00000006342	Susd2
ENSMUSG00000021585		ENSMUSG00000037541		ENSMUSG00000029675		ENSMUSG00000040929	Rfx3
ENSMUSG00000055172		ENSMUSG00000033740		ENSMUSG00000030103		ENSMUSG00000018830	Myh11
ENSMUSG00000041020		ENSMUSG00000021733		ENSMUSG00000033717		ENSMUSG00000033615	Cplx1
ENSMUSG00000051652		ENSMUSG00000033191		ENSMUSG00000036098		ENSMUSG00000010175	Prox1
ENSMUSG00000029675		ENSMUSG00000027750		ENSMUSG00000036169		ENSMUSG00000027848	Olfml3
ENSMUSG00000022208		ENSMUSG00000034151		ENSMUSG00000059361		ENSMUSG00000095407	Tmem200c
ENSMUSG00000017417		ENSMUSG00000030701		ENSMUSG00000066721		ENSMUSG00000051242	Pcdhb9
ENSMUSG00000025422		ENSMUSG00000044043		ENSMUSG00000075012		ENSMUSG00000115529	CT009510.2
ENSMUSG00000032125		ENSMUSG00002076809		ENSMUSG00000090877		ENSMUSG00000103332	Pcdhga2
ENSMUSG00000052848		ENSMUSG00000116557		ENSMUSG00000097797		ENSMUSG00000093773	Obox3-ps7
ENSMUSG00000100210		ENSMUSG00000041134		ENSMUSG00000111443		ENSMUSG00000051599	Pcdhb2
ENSMUSG00000002289		ENSMUSG00000028364		ENSMUSG00000025608		ENSMUSG00000045498	Pcdhb3
ENSMUSG00000019194		ENSMUSG00000044176		ENSMUSG00000025888		ENSMUSG00000103793	Pcdhga6
ENSMUSG00000041926		ENSMUSG00000039126		ENSMUSG00000026676		ENSMUSG00000100586	Vmn1r90
ENSMUSG00000070858		ENSMUSG00000053166		ENSMUSG00000031409		ENSMUSG00000113121	Gm35161
ENSMUSG00000037469		ENSMUSG00000022416		ENSMUSG00000031557		ENSMUSG00000031170	Slc38a5
ENSMUSG00000059187		ENSMUSG00000029084		ENSMUSG00000034768		ENSMUSG00000020889	Nr1d1
ENSMUSG00000016763		ENSMUSG00000073590		ENSMUSG00000037843		ENSMUSG00000045876	Pcdhb8
ENSMUSG00000026020		ENSMUSG00000042284		ENSMUSG00000039109		ENSMUSG00000024598	Fbn2
ENSMUSG00000042035		ENSMUSG00000040649		ENSMUSG00000040495		ENSMUSG00000032323	Cyp11a1
ENSMUSG00000064264		ENSMUSG00000107677		ENSMUSG00000040565		ENSMUSG00000052759	Gpr25
ENSMUSG00000016487		ENSMUSG00000019768		ENSMUSG00000041377		ENSMUSG00000020914	Top2a
ENSMUSG00000021130		ENSMUSG00000051550		ENSMUSG00000045318		ENSMUSG00000085773	Gm16233
ENSMUSG00000075585		ENSMUSG00000027536		ENSMUSG00000047459		ENSMUSG00000096107	Gm16505
ENSMUSG00000105565		ENSMUSG00000026072		ENSMUSG00000047996		ENSMUSG00000026452	Syt2
ENSMUSG00000116180		ENSMUSG00000105011		ENSMUSG00000049241		ENSMUSG00000030236	Slco1b2
ENSMUSG00000050295		ENSMUSG00000026814		ENSMUSG00000056306		ENSMUSG00000033768	Nrxn2
ENSMUSG00000106847		ENSMUSG00000041926		ENSMUSG00000075702		ENSMUSG00000103897	Pcdhga8
ENSMUSG00000044042		ENSMUSG00000116081		ENSMUSG00000082229		ENSMUSG00000051678	Pcdhb6
ENSMUSG00000019768		ENSMUSG00000046808		ENSMUSG00000095562		ENSMUSG00000028763	Hspg2
ENSMUSG00000047632		ENSMUSG00000064994		ENSMUSG00000105891		ENSMUSG00000045689	Pcdhb4
ENSMUSG00000066721		ENSMUSG00000004031		ENSMUSG00000116867		ENSMUSG00000086181	C230034O21Rik
ENSMUSG00000113294		ENSMUSG00000076612		ENSMUSG00000002289		ENSMUSG00000060675	Pla2g16
ENSMUSG00000036422		ENSMUSG00000038370		ENSMUSG00000024411		ENSMUSG00000041741	Pde3a
ENSMUSG00000019889		ENSMUSG00000028174		ENSMUSG00000026864		ENSMUSG00002075524	unnamed_miRNA
ENSMUSG00000105011		ENSMUSG00000000305		ENSMUSG00000029455		ENSMUSG00000051486	Pcdhb11
ENSMUSG00000036155		ENSMUSG00000066747		ENSMUSG00000029648		ENSMUSG00000003346	Abhd17a
ENSMUSG00000010175		ENSMUSG00000037428		ENSMUSG00000034317		ENSMUSG00000104264	Gm18529
ENSMUSG00000021280		ENSMUSG00000032911		ENSMUSG00000050505		ENSMUSG00000031167	Rbm3
ENSMUSG00000070348		ENSMUSG00000027435		ENSMUSG00000068696		ENSMUSG00000034685	Fam171a2
ENSMUSG00000029581		ENSMUSG00000015468		ENSMUSG00000084843		ENSMUSG00000006522	Itih3
ENSMUSG00000020990		ENSMUSG00000021280		ENSMUSG00000095123		ENSMUSG00000056116	H2-T22
ENSMUSG00000039904		ENSMUSG00000016487		ENSMUSG00000105613		ENSMUSG00000063687	Pcdhb5
ENSMUSG00000064994		ENSMUSG00000050822		ENSMUSG00000113387		ENSMUSG00000047307	Pcdhb13
ENSMUSG00000040152		ENSMUSG00000046607		ENSMUSG00000113920		ENSMUSG00000045083	Lingo2
ENSMUSG00000054871		ENSMUSG00000039457		ENSMUSG00000114310		ENSMUSG00000085526	Gm16083
ENSMUSG00000025128		ENSMUSG00000050295		ENSMUSG00000005716		ENSMUSG00000041120	Nbl1
ENSMUSG00000027339		ENSMUSG00000078794		ENSMUSG00000025794		ENSMUSG00000022421	Nptxr
ENSMUSG00000042286		ENSMUSG00000021585		ENSMUSG00000027962		ENSMUSG00000090799	Klhl33
ENSMUSG00000116081		ENSMUSG00000072663		ENSMUSG00000028019		ENSMUSG00000040125	Gpr26
ENSMUSG00000074576		ENSMUSG00000044667		ENSMUSG00000029206		ENSMUSG00000031805	Jak3
ENSMUSG00000031790		ENSMUSG00000064264		ENSMUSG00000044734		ENSMUSG00000113294	AC154636.1
ENSMUSG00000064215		ENSMUSG00000007682		ENSMUSG00000046432		ENSMUSG00000089679	Gm16299
ENSMUSG00000107677		ENSMUSG00000099583		ENSMUSG00000047632		ENSMUSG00000074892	B3galt5
ENSMUSG00000029661		ENSMUSG00000059361		ENSMUSG00000074576		ENSMUSG00000034201	Gas2l1
ENSMUSG00000035606		ENSMUSG00000026630		ENSMUSG00000094840		ENSMUSG00000080058	Gm11175
ENSMUSG00000040563		ENSMUSG00000021047		ENSMUSG00000019966		ENSMUSG00000098097	6530403H02Rik
ENSMUSG00000027750		ENSMUSG00000027015		ENSMUSG00000020681		ENSMUSG00000074776	Gm10754
ENSMUSG00000006342		ENSMUSG00000041020		ENSMUSG00000023911		ENSMUSG00000055633	Zfp580
ENSMUSG00000002111		ENSMUSG00000025727		ENSMUSG00000032334		ENSMUSG00000006920	Ezh1
ENSMUSG00000030513		ENSMUSG00000010825		ENSMUSG00000037428		ENSMUSG00000106644	Gm40331
ENSMUSG00000034974		ENSMUSG00000022187		ENSMUSG00000041923		ENSMUSG00000029661	Col1a2
ENSMUSG00000086841		ENSMUSG00000055172		ENSMUSG00000048240		ENSMUSG00000026179	Pnkd
ENSMUSG00000029419		ENSMUSG00000033295		ENSMUSG00000053166		ENSMUSG00000037469	Acp7
ENSMUSG00000042284		ENSMUSG00000040929		ENSMUSG00000053175		ENSMUSG00000104868	Gm9954
ENSMUSG00000114433		ENSMUSG00000020734		ENSMUSG00000053963		ENSMUSG00000104093	A330015K06Rik
ENSMUSG00000020087		ENSMUSG00000029826		ENSMUSG00000059213		ENSMUSG00000105565	Gm43566
ENSMUSG00000002012		ENSMUSG00000002111		ENSMUSG00000063021		ENSMUSG00000051149	Adnp
ENSMUSG00000026814		ENSMUSG00000048583		ENSMUSG00000070348		ENSMUSG00000035270	Impg2
ENSMUSG00000028753		ENSMUSG00000006342		ENSMUSG00000073982		ENSMUSG00000040274	Cdk6
ENSMUSG00000032911		ENSMUSG00000051331		ENSMUSG00000115360		ENSMUSG00000028860	Sytl1
ENSMUSG00000076612		ENSMUSG00000022096		ENSMUSG00000004285		ENSMUSG00000030209	Grin2b
ENSMUSG00000091636		ENSMUSG00000082229		ENSMUSG00000020178		ENSMUSG00000002393	Nr2f6
ENSMUSG00000116557		ENSMUSG00000032280		ENSMUSG00000022096		ENSMUSG00000026042	Col5a2
ENSMUSG00000026888		ENSMUSG00000002012		ENSMUSG00000022769		ENSMUSG00000059187	Fam19a1
ENSMUSG00000086003		ENSMUSG00000102543		ENSMUSG00000027581		ENSMUSG00000031618	Nr3c2
ENSMUSG00000028176		ENSMUSG00000042035		ENSMUSG00000028964		ENSMUSG00000022419	Deptor
ENSMUSG00000034151		ENSMUSG00000015143		ENSMUSG00000034164		ENSMUSG00000030994	D7Ertd443e
ENSMUSG00000031807		ENSMUSG00000047907		ENSMUSG00000034613		ENSMUSG00000097178	2310002F09Rik
ENSMUSG00000034412		ENSMUSG00000054871		ENSMUSG00000037166		ENSMUSG00000114433	Gm48488
ENSMUSG00000028174		ENSMUSG00000036256		ENSMUSG00000039105		ENSMUSG00000070858	Gm1673
ENSMUSG00000040097		ENSMUSG00000027004		ENSMUSG00000042529		ENSMUSG00000026193	Fn1
ENSMUSG00000092094		ENSMUSG00000013858		ENSMUSG00000049775		ENSMUSG00000024887	Asah2
ENSMUSG00000029163		ENSMUSG00000097797		ENSMUSG00000050295		ENSMUSG00000075014	Gm10800
ENSMUSG00000021466		ENSMUSG00000039474		ENSMUSG00000051435		ENSMUSG00000022483	Col2a1
ENSMUSG00000031983		ENSMUSG00000086003		ENSMUSG00000055172		ENSMUSG00000048616	Nog
ENSMUSG00000032036		ENSMUSG00000066721		ENSMUSG00000061615		ENSMUSG00000009551	6330409D20Rik
ENSMUSG00000036264		ENSMUSG00000035606		ENSMUSG00000069273		ENSMUSG00000053080	2700081O15Rik
ENSMUSG00000038128		ENSMUSG00000047419		ENSMUSG00000081683		ENSMUSG00000049928	Glp2r
ENSMUSG00000042369		ENSMUSG00000025425		ENSMUSG00000025213		ENSMUSG00000055067	Smyd3
ENSMUSG00000058056		ENSMUSG00000044042		ENSMUSG00000046922		ENSMUSG00000032356	Rasgrf1
ENSMUSG00000063804		ENSMUSG00000043458		ENSMUSG00000007892		ENSMUSG00000042286	Stab1
ENSMUSG00000022483		ENSMUSG00000072966		ENSMUSG00000019232		ENSMUSG00000059182	Skap2
ENSMUSG00000029554		ENSMUSG00000053411		ENSMUSG00000030787		ENSMUSG00000061186	Sfmbt2
ENSMUSG00000046229		ENSMUSG00000063430		ENSMUSG00000032174		ENSMUSG00000033740	St18
ENSMUSG00000010825		ENSMUSG00000022208		ENSMUSG00000032330		ENSMUSG00000021733	Slc4a7
ENSMUSG00000033249		ENSMUSG00000029090		ENSMUSG00000032373		ENSMUSG00000033191	Tie1
ENSMUSG00000072663		ENSMUSG00000075585		ENSMUSG00000039474		ENSMUSG00000034151	Zbbx
ENSMUSG00000031273		ENSMUSG00000032125		ENSMUSG00000041608		ENSMUSG00000044043	Pcdhb14
ENSMUSG00000040495		ENSMUSG00000037843		ENSMUSG00000042182		ENSMUSG00000028364	Tnc
ENSMUSG00000097797		ENSMUSG00000040867		ENSMUSG00000049164		ENSMUSG00000044176	Spink10
ENSMUSG00000029471		ENSMUSG00000033460		ENSMUSG00000062960		ENSMUSG00000039126	Prune2
ENSMUSG00000099583		ENSMUSG00000047996		ENSMUSG00000101355		ENSMUSG00000029084	Cd38
ENSMUSG00000024513		ENSMUSG00000031558		ENSMUSG00000104586		ENSMUSG00000073590	3222401L13Rik
ENSMUSG00000032338		ENSMUSG00000020396		ENSMUSG00000002083		ENSMUSG00000042284	Itga1
ENSMUSG00000040717		ENSMUSG00000028756		ENSMUSG00000020022		ENSMUSG00000040649	Rimklb
ENSMUSG00000050822		ENSMUSG00000031273		ENSMUSG00000020905		ENSMUSG00000019768	Esr1
ENSMUSG00000074505		ENSMUSG00000055333		ENSMUSG00000023904		ENSMUSG00000051550	Zfp579
ENSMUSG00000027004		ENSMUSG00000070601		ENSMUSG00000027015		ENSMUSG00000027536	Chmp4c
ENSMUSG00000050910		ENSMUSG00000020681		ENSMUSG00000033377		ENSMUSG00000105011	Gm43210
ENSMUSG00000033460		ENSMUSG00000019889		ENSMUSG00000034872		ENSMUSG00000026814	Eng
ENSMUSG00000029076		ENSMUSG00000026994		ENSMUSG00000037185		ENSMUSG00000041926	Rnpep
ENSMUSG00000047996		ENSMUSG00000051652		ENSMUSG00000049517		ENSMUSG00000046808	Atp10d
ENSMUSG00000048583		ENSMUSG00000063804		ENSMUSG00000052456		ENSMUSG00000064994	Gm22422
ENSMUSG00000056394		ENSMUSG00000086841		ENSMUSG00000087620		ENSMUSG00000004031	Brinp2
ENSMUSG00000030739		ENSMUSG00000039621		ENSMUSG00000088185		ENSMUSG00000028174	Rpe65
ENSMUSG00000020681		ENSMUSG00000057606		ENSMUSG00000106147		ENSMUSG00000000305	Cdh4
ENSMUSG00000006411		ENSMUSG00000021180		ENSMUSG00000109121		ENSMUSG00000066747	Olfr878
ENSMUSG00000021047		ENSMUSG00000064215		ENSMUSG00000117930		ENSMUSG00000015468	Notch4
ENSMUSG00000033965		ENSMUSG00000036777		ENSMUSG00000000093		ENSMUSG00000021280	Exoc3l4
ENSMUSG00000029098		ENSMUSG00000097435		ENSMUSG00000002012		ENSMUSG00000016487	Ppfibp1
ENSMUSG00000015468		ENSMUSG00000032705		ENSMUSG00000006362		ENSMUSG00000050822	Slc29a4
ENSMUSG00000026994		ENSMUSG00000052848		ENSMUSG00000014782		ENSMUSG00000039457	Ppl
ENSMUSG00000097178		ENSMUSG00000046480		ENSMUSG00000023034		ENSMUSG00000078794	Dact3
ENSMUSG00000102543		ENSMUSG00000028475		ENSMUSG00000026822		ENSMUSG00000021585	Cast
ENSMUSG00000050705		ENSMUSG00000029163		ENSMUSG00000030413		ENSMUSG00000072663	Spef2
ENSMUSG00000027015		ENSMUSG00000047632		ENSMUSG00000031494		ENSMUSG00000064264	Zfp428
ENSMUSG00000000305		ENSMUSG00000051527		ENSMUSG00000032911		ENSMUSG00000026630	Batf3
ENSMUSG00000074749		ENSMUSG00000100837		ENSMUSG00000045193		ENSMUSG00000021047	Nova1
ENSMUSG00000040265		ENSMUSG00000074576		ENSMUSG00000102753		ENSMUSG00000041020	Map7d2
ENSMUSG00000063430		ENSMUSG00000027864		ENSMUSG00000006411		ENSMUSG00000025727	A930017K11Rik
ENSMUSG00000078794		ENSMUSG00000041324		ENSMUSG00000027562		ENSMUSG00000010825	Grid2ip
ENSMUSG00000100303		ENSMUSG00000057123		ENSMUSG00000028631		ENSMUSG00000022187	Gm5546
ENSMUSG00000021340		ENSMUSG00000074505		ENSMUSG00000033152		ENSMUSG00000033295	Ptprf
ENSMUSG00000026072		ENSMUSG00000039089		ENSMUSG00000041559		ENSMUSG00000029826	Zc3hav1
ENSMUSG00000036620		ENSMUSG00000058056		ENSMUSG00000046470		ENSMUSG00000002111	Spi1
ENSMUSG00000038370		ENSMUSG00000055027		ENSMUSG00000060240		ENSMUSG00000048583	Igf2
ENSMUSG00000048029		ENSMUSG00000105891		ENSMUSG00000015476		ENSMUSG00000051331	Cacna1c
ENSMUSG00000026822		ENSMUSG00000041923		ENSMUSG00000020709		ENSMUSG00000032280	Tle3
ENSMUSG00000037822		ENSMUSG00000091623		ENSMUSG00000034460		ENSMUSG00000102543	Pcdhgc5
ENSMUSG00000040929		ENSMUSG00000034341		ENSMUSG00000034714		ENSMUSG00000042035	Igsf3
ENSMUSG00000020734		ENSMUSG00000042532		ENSMUSG00000044667		ENSMUSG00000015143	Actn1
ENSMUSG00000034282		ENSMUSG00000028782		ENSMUSG00000049892		ENSMUSG00000054871	Tmem158
ENSMUSG00000032280		ENSMUSG00000020990		ENSMUSG00000051652		ENSMUSG00000036256	Igfbp7
ENSMUSG00000045777		ENSMUSG00000028753		ENSMUSG00000090291		ENSMUSG00000086003	B230206L02Rik
ENSMUSG00000091896		ENSMUSG00000095407		ENSMUSG00000026365		ENSMUSG00000035606	Ky
ENSMUSG00000110649		ENSMUSG00000018830		ENSMUSG00000031840		ENSMUSG00000047419	Cmya5
ENSMUSG00000039126		ENSMUSG00000024883		ENSMUSG00000037833		ENSMUSG00000025425	St8sia5
ENSMUSG00000095562		ENSMUSG00000031790		ENSMUSG00000043165		ENSMUSG00000044042	Fmn1
ENSMUSG00000039089		ENSMUSG00000004637		ENSMUSG00000064354		ENSMUSG00000043458	Pcdhb12
ENSMUSG00000021180		ENSMUSG00000057455		ENSMUSG00000088088		ENSMUSG00000072966	Gprasp2
ENSMUSG00000055333		ENSMUSG00000031216		ENSMUSG00000006333		ENSMUSG00000053411	Cbx7
ENSMUSG00000041740		ENSMUSG00000013523		ENSMUSG00000020331		ENSMUSG00000063430	Wscd2
ENSMUSG00000002900		ENSMUSG00000000957		ENSMUSG00000024378		ENSMUSG00000022208	Jph4
ENSMUSG00000031137		ENSMUSG00000028804		ENSMUSG00000030350		ENSMUSG00000029090	Adgra3
ENSMUSG00000046607		ENSMUSG00000027827		ENSMUSG00000038274		ENSMUSG00000075585	6330403L08Rik
ENSMUSG00000004894		ENSMUSG00000028456		ENSMUSG00000050628		ENSMUSG00000032125	Robo4
ENSMUSG00000097431		ENSMUSG00000030513		ENSMUSG00000057455		ENSMUSG00000040867	Begain
ENSMUSG00000101355		ENSMUSG00000119476		ENSMUSG00000022452		ENSMUSG00000033460	Armcx1
ENSMUSG00000027227		ENSMUSG00000105867		ENSMUSG00000027220		ENSMUSG00000031558	Slit2
ENSMUSG00000105891		ENSMUSG00000040495		ENSMUSG00000028367		ENSMUSG00000028756	Pink1
ENSMUSG00000100837		ENSMUSG00000010175		ENSMUSG00000029819		ENSMUSG00000031273	Col4a6
ENSMUSG00000032735		ENSMUSG00000024736		ENSMUSG00000030256		ENSMUSG00000055333	Fat2
ENSMUSG00000004187		ENSMUSG00000033061		ENSMUSG00000034341		ENSMUSG00000019889	Ptprk
ENSMUSG00000026170		ENSMUSG00000051650		ENSMUSG00000034612		ENSMUSG00000026994	Galnt3
ENSMUSG00000033295		ENSMUSG00000017417		ENSMUSG00000039059		ENSMUSG00000063804	Lin28b
ENSMUSG00000004317		ENSMUSG00000031983		ENSMUSG00000058488		ENSMUSG00000086841	2410006H16Rik
ENSMUSG00000058881		ENSMUSG00000004894		ENSMUSG00000078137		ENSMUSG00000039621	Prex1
ENSMUSG00000053166		ENSMUSG00000015846		ENSMUSG00000097604		ENSMUSG00000057606	Colq
ENSMUSG00000039457		ENSMUSG00000022836		ENSMUSG00000110540		ENSMUSG00000021180	Rps6ka5
ENSMUSG00000021400		ENSMUSG00000039328		ENSMUSG00000111844		ENSMUSG00000064215	Ifi27
ENSMUSG00000019806		ENSMUSG00000034282		ENSMUSG00000015806		ENSMUSG00000036777	Anln
ENSMUSG00000049532		ENSMUSG00000113555		ENSMUSG00000022658		ENSMUSG00000032705	Exd2
ENSMUSG00000020593		ENSMUSG00000027220		ENSMUSG00000036620		ENSMUSG00000052848	C130026L21Rik
ENSMUSG00000022416		ENSMUSG00000053395		ENSMUSG00000056656		ENSMUSG00000028475	Spaar
ENSMUSG00000028631		ENSMUSG00000039059		ENSMUSG00000062328		ENSMUSG00000029163	Emilin1
ENSMUSG00000027001		ENSMUSG00000027253		ENSMUSG00000002341		ENSMUSG00000051527	Usp29
ENSMUSG00000028756		ENSMUSG00000021709		ENSMUSG00000006342		ENSMUSG00000100837	1700063D05Rik
ENSMUSG00000031558		ENSMUSG00000030111		ENSMUSG00000015396		ENSMUSG00000027864	Ptgfrn
ENSMUSG00000050064		ENSMUSG00000018451		ENSMUSG00000015843		ENSMUSG00000057123	Gja5
ENSMUSG00000099342		ENSMUSG00000091896		ENSMUSG00000027669		ENSMUSG00000074505	Fat3
ENSMUSG00000039059		ENSMUSG00000034997		ENSMUSG00000030647		ENSMUSG00000039089	L3mbtl3
ENSMUSG00000051435		ENSMUSG00000104507		ENSMUSG00000040929		ENSMUSG00000058056	Palld
ENSMUSG00000044345		ENSMUSG00000038060		ENSMUSG00000110086		ENSMUSG00000055027	Smyd1
ENSMUSG00000068739		ENSMUSG00000042816		ENSMUSG00000018830		ENSMUSG00000091623	Gm17092
ENSMUSG00000095407		ENSMUSG00000105985		ENSMUSG00000020255		ENSMUSG00000042532	Golga7b
ENSMUSG00000097604		ENSMUSG00000070880		ENSMUSG00000027248		ENSMUSG00000028782	Adgrb2
ENSMUSG00000005447		ENSMUSG00000055430		ENSMUSG00000033307		ENSMUSG00000020990	Cdkl1
ENSMUSG00000041037		ENSMUSG00000055540		ENSMUSG00000033615		ENSMUSG00000028753	Vwa5b1
ENSMUSG00000059361		ENSMUSG00000024423		ENSMUSG00000040181		ENSMUSG00000024883	Rin1
ENSMUSG00000027435		ENSMUSG00000097604		ENSMUSG00000105517		ENSMUSG00000031790	Mmp15
ENSMUSG00000036644		ENSMUSG00000046093		ENSMUSG00000000308		ENSMUSG00000004637	Wwox
ENSMUSG00000034341		ENSMUSG00000031409		ENSMUSG00000010175		ENSMUSG00000000957	Mmp14
ENSMUSG00000014602		ENSMUSG00000002763		ENSMUSG00000018387		ENSMUSG00000027827	Kcnab1
ENSMUSG00000025237		ENSMUSG00000026275		ENSMUSG00000027848		ENSMUSG00000028456	Unc13b
ENSMUSG00000030701		ENSMUSG00000067653		ENSMUSG00000038530		ENSMUSG00000030513	Pcsk6
ENSMUSG00000021577		ENSMUSG00000020357		ENSMUSG00000049536		ENSMUSG00000105867	Gm42517
ENSMUSG00000059003		ENSMUSG00000114278		ENSMUSG00000020154		ENSMUSG00000024736	Tmem132a
ENSMUSG00000037196		ENSMUSG00000024440		ENSMUSG00000020163		ENSMUSG00000033061	Resp18
ENSMUSG00000027827		ENSMUSG00000032500		ENSMUSG00000025362		ENSMUSG00000017417	Plxdc1
ENSMUSG00000032705		ENSMUSG00000027939		ENSMUSG00000095407		ENSMUSG00000031983	2310022B05Rik
ENSMUSG00000038060		ENSMUSG00000026712		ENSMUSG00000114267		ENSMUSG00000004894	Hapln2
ENSMUSG00000026193		ENSMUSG00000031807				ENSMUSG00000015846	Rxra
ENSMUSG00000031409		ENSMUSG00000052688				ENSMUSG00000022836	Mylk
ENSMUSG00000063445		ENSMUSG00000034675				ENSMUSG00000039328	Rnf122
ENSMUSG00000002265		ENSMUSG00000071341				ENSMUSG00000113555	Gm10095
ENSMUSG00000036256		ENSMUSG00000012443				ENSMUSG00000053395	Cacng8
ENSMUSG00000070601		ENSMUSG00000031486				ENSMUSG00000027253	Lrp4
ENSMUSG00000039050		ENSMUSG00000111583				ENSMUSG00000021709	Erbin
ENSMUSG00000037541		ENSMUSG00000050304				ENSMUSG00000030111	A2m
ENSMUSG00000113555		ENSMUSG00000022636				ENSMUSG00000091896	Ube2d2a
ENSMUSG00000057554		ENSMUSG00000022012				ENSMUSG00000104507	A430027H14Rik
ENSMUSG00000041923		ENSMUSG00000075316				ENSMUSG00000038060	Dlec1
ENSMUSG00000109121		ENSMUSG00000020176				ENSMUSG00000070880	Gad1
ENSMUSG00000025856		ENSMUSG00000039831				ENSMUSG00000055430	Nap1l5
ENSMUSG00000044783		ENSMUSG00000037280				ENSMUSG00000055540	Epha6
ENSMUSG00000051726		ENSMUSG00000061482				ENSMUSG00000024423	Impact
ENSMUSG00000060032		ENSMUSG00000110649				ENSMUSG00000046093	Hpcal4
ENSMUSG00000039988		ENSMUSG00000040390				ENSMUSG00000026275	Ppp1r7
ENSMUSG00000029404		ENSMUSG00000029334				ENSMUSG00000020357	Flt4
ENSMUSG00000030678		ENSMUSG00000039860				ENSMUSG00000114278	AC157931.1
ENSMUSG00000032128		ENSMUSG00000024378				ENSMUSG00000032500	Dclk3
ENSMUSG00000028630		ENSMUSG00000035860				ENSMUSG00000031807	Pgls
ENSMUSG00000028475		ENSMUSG00000092021				ENSMUSG00000052688	Rab7b
ENSMUSG00000023266		ENSMUSG00000092094				ENSMUSG00000034675	Dbn1
ENSMUSG00000001506		ENSMUSG00000030739				ENSMUSG00000012443	Kif11
ENSMUSG00000050944		ENSMUSG00000014782				ENSMUSG00000031486	Adgra2
ENSMUSG00000013629		ENSMUSG00000040563				ENSMUSG00000022636	Alcam
ENSMUSG00000021065		ENSMUSG00000026678				ENSMUSG00000022012	Enox1
ENSMUSG00000050423		ENSMUSG00000026888				ENSMUSG00000075316	Scn9a
ENSMUSG00000061607		ENSMUSG00000049532				ENSMUSG00000020176	Grb10
ENSMUSG00000112280		ENSMUSG00000044006				ENSMUSG00000039831	Arhgap29
ENSMUSG00000020357		ENSMUSG00000035711				ENSMUSG00000110649	Gm40466
ENSMUSG00000039830		ENSMUSG00000002100				ENSMUSG00000040390	Map3k10
ENSMUSG00000052613		ENSMUSG00000052613				ENSMUSG00000029334	Prkg2
ENSMUSG00000082229		ENSMUSG00000081683				ENSMUSG00000035860	Cdhr3
ENSMUSG00000025213		ENSMUSG00000079055				ENSMUSG00000092094	Zfp804b
ENSMUSG00000022836		ENSMUSG00000073147				ENSMUSG00000030739	Myh14
ENSMUSG00000055540		ENSMUSG00000104936				ENSMUSG00000040563	Plppr2
ENSMUSG00000036006		ENSMUSG00000032338				ENSMUSG00000026888	Grb14
ENSMUSG00000093536		ENSMUSG00000027221				ENSMUSG00000049532	Sall2
ENSMUSG00000021375		ENSMUSG00000044122				ENSMUSG00000052613	Pcdh15
ENSMUSG00000027220		ENSMUSG00000112968				ENSMUSG00000079055	Slc8a3
ENSMUSG00000028394		ENSMUSG00000019846				ENSMUSG00000073147	5031425E22Rik
ENSMUSG00000117864		ENSMUSG00000097431				ENSMUSG00000104936	2610011E03Rik
ENSMUSG00000039328		ENSMUSG00000050105				ENSMUSG00000032338	Hcn4
ENSMUSG00000008398		ENSMUSG00000034612				ENSMUSG00000027221	Chst1
ENSMUSG00000020176		ENSMUSG00000050138				ENSMUSG00000044122	Proca1
ENSMUSG00000027536		ENSMUSG00000092048				ENSMUSG00000112968	Gm48530
ENSMUSG00000040390		ENSMUSG00000033615				ENSMUSG00000019846	Lama4
ENSMUSG00000053395		ENSMUSG00000100303				ENSMUSG00000097431	Gm26782
ENSMUSG00000022636		ENSMUSG00000049871				ENSMUSG00000050105	Grrp1
ENSMUSG00000034612		ENSMUSG00000060240				ENSMUSG00000100303	2600014E21Rik
ENSMUSG00000026630		ENSMUSG00000054162				ENSMUSG00000049871	Nlrc3
ENSMUSG00000050315		ENSMUSG00000037833				ENSMUSG00000062252	Lhfpl5
ENSMUSG00000022096		ENSMUSG00000062252				ENSMUSG00000025314	Ptprj
ENSMUSG00000012443		ENSMUSG00000029648				ENSMUSG00000117864	Gm19500
ENSMUSG00000055027		ENSMUSG00000095616				ENSMUSG00000107595	Gm44441
ENSMUSG00000037843		ENSMUSG00000034317				ENSMUSG00000049630	C1ql3
ENSMUSG00000106139		ENSMUSG00000025314				ENSMUSG00000091636	Akain1
ENSMUSG00000070880		ENSMUSG00000109770
ENSMUSG00000026275		ENSMUSG00000039105
ENSMUSG00000037126		ENSMUSG00000117864
ENSMUSG00000025425		ENSMUSG00000036620
ENSMUSG00000107595		ENSMUSG00000107595
ENSMUSG00000027864		ENSMUSG00000049630
ENSMUSG00000037280		ENSMUSG00000091636
ENSMUSG00000057606
ENSMUSG00000104507
ENSMUSG00000015143
ENSMUSG00000025727
ENSMUSG00000028914
ENSMUSG00000028906
ENSMUSG00000103472
ENSMUSG00000032500
ENSMUSG00000027221
ENSMUSG00000074737
ENSMUSG00000023911
ENSMUSG00000039474
ENSMUSG00000020265
ENSMUSG00000036777
ENSMUSG00000039278
ENSMUSG00000051331
ENSMUSG00000028701
ENSMUSG00000034206
ENSMUSG00000022269
ENSMUSG00000073591
ENSMUSG00000039831
ENSMUSG00000033632
ENSMUSG00000047910
ENSMUSG00000033781
ENSMUSG00000037428
ENSMUSG00000056501
ENSMUSG00000048120
ENSMUSG00000056820
ENSMUSG00000027359
ENSMUSG00000052911
ENSMUSG00000025226
ENSMUSG00000019846
ENSMUSG00000026208
ENSMUSG00000029086
ENSMUSG00000100954
ENSMUSG00000112968
ENSMUSG00000005882
ENSMUSG00000073147
ENSMUSG00000029093
ENSMUSG00000078584
ENSMUSG00000020396
ENSMUSG00000050138
ENSMUSG00000110249
ENSMUSG00000112540
ENSMUSG00000025586
ENSMUSG00000033356
ENSMUSG00000105867
ENSMUSG00000031486
ENSMUSG00000026519
ENSMUSG00000086596
ENSMUSG00000086308
ENSMUSG00000066129
ENSMUSG00000015709
ENSMUSG00000027253
ENSMUSG00000035860
ENSMUSG00000063765
ENSMUSG00000028456
ENSMUSG00000056076
ENSMUSG00000030111
ENSMUSG00000081683
ENSMUSG00000026322
ENSMUSG00000041911
ENSMUSG00000049538
ENSMUSG00000024805
ENSMUSG00000096847
ENSMUSG00000037217
ENSMUSG00000066747
ENSMUSG00000093803
ENSMUSG00000055723
ENSMUSG00000050855
ENSMUSG00000044122
ENSMUSG00000021259
ENSMUSG00000025314
ENSMUSG00000025366
ENSMUSG00000024423
ENSMUSG00000052688
ENSMUSG00000040706
ENSMUSG00000094786
ENSMUSG00000027848
ENSMUSG00000031534
ENSMUSG00000033949
ENSMUSG00000070705
ENSMUSG00000078853
ENSMUSG00000024579
ENSMUSG00000110020
ENSMUSG00000046791
ENSMUSG00000109108
ENSMUSG00000026399
ENSMUSG00000029162
ENSMUSG00000051537
ENSMUSG00000028541
ENSMUSG00000085642
ENSMUSG00000029833
ENSMUSG00000028782
ENSMUSG00000007682
ENSMUSG00000002396
ENSMUSG00000015112
ENSMUSG00000018830
ENSMUSG00000022187
ENSMUSG00000024736
ENSMUSG00000029245
ENSMUSG00000029334
ENSMUSG00000029363
ENSMUSG00000034675
ENSMUSG00000039621
ENSMUSG00000062252
ENSMUSG00000070462
ENSMUSG00000075307
ENSMUSG00000098128
ENSMUSG00000031274
ENSMUSG00000020375
ENSMUSG00000045087
ENSMUSG00000046806
ENSMUSG00000114278
ENSMUSG00000042557
ENSMUSG00000001229
ENSMUSG00000034164
ENSMUSG00000045193
ENSMUSG00000021709
ENSMUSG00000033760
ENSMUSG00000046480
ENSMUSG00000049630
ENSMUSG00000058655
ENSMUSG00000050105
ENSMUSG00000034317
ENSMUSG00000020604
ENSMUSG00000021916
ENSMUSG00000048799
ENSMUSG00000061171
ENSMUSG00000000202
ENSMUSG00000026676
ENSMUSG00000020530
ENSMUSG00000022012
ENSMUSG00000075316
ENSMUSG00000002546
ENSMUSG00000046215
ENSMUSG00000053835
ENSMUSG00000039809
ENSMUSG00000037608
ENSMUSG00000026672
ENSMUSG00000062209
ENSMUSG00000031937
ENSMUSG00000057123
ENSMUSG00000015790
ENSMUSG00000104374
ENSMUSG00000035711
ENSMUSG00000114590
ENSMUSG00000060257
ENSMUSG00000013523
ENSMUSG00000019978
ENSMUSG00000024378
ENSMUSG00000026655
ENSMUSG00000030600
ENSMUSG00000031563
ENSMUSG00000049871
ENSMUSG00000057716
ENSMUSG00000092060
ENSMUSG00000024883
ENSMUSG00000021377
ENSMUSG00000033061
ENSMUSG00000112393
ENSMUSG00000001143
ENSMUSG00000038354
ENSMUSG00000034544
ENSMUSG00000070047
ENSMUSG00000091623
ENSMUSG00000002083
ENSMUSG00000037111
ENSMUSG00000024913
ENSMUSG00000037833
ENSMUSG00000041324
ENSMUSG00000046093
ENSMUSG00000026640
ENSMUSG00000031987
ENSMUSG00000034891
ENSMUSG00000026712
ENSMUSG00000104936
ENSMUSG00000097311
ENSMUSG00000033615
ENSMUSG00000055134
ENSMUSG00000022240
ENSMUSG00000027353
ENSMUSG00000055932
ENSMUSG00000069273
ENSMUSG00000058441
ENSMUSG00000000568
ENSMUSG00000021113
ENSMUSG00000049571
ENSMUSG00000055485
ENSMUSG00000030413
ENSMUSG00000029994
ENSMUSG00000021957
ENSMUSG00000026389
ENSMUSG00000031864
ENSMUSG00000074578
ENSMUSG00000055430

## Sheet: CTX YvO
DESeq2		edgeR		Cuffdiff		Consensus	Name
ENSMUSG00000045498		ENSMUSG00000056999		ENSMUSG00000001506		ENSMUSG00000045498	Pcdhb3
ENSMUSG00000056999		ENSMUSG00000041596		ENSMUSG00000002341		ENSMUSG00000056999	Ide
ENSMUSG00000022076		ENSMUSG00000078502		ENSMUSG00000003934		ENSMUSG00000022076	Klhl1
ENSMUSG00000009075		ENSMUSG00000100586		ENSMUSG00000004894		ENSMUSG00000009075	Cabp7
ENSMUSG00000041596		ENSMUSG00000022076		ENSMUSG00000005124		ENSMUSG00000041596	Nlrp5-ps
ENSMUSG00000078502		ENSMUSG00000113342		ENSMUSG00000006411		ENSMUSG00000078502	Zfp268
ENSMUSG00000009376		ENSMUSG00000045498		ENSMUSG00000007682		ENSMUSG00000009376	Met
ENSMUSG00000100586		ENSMUSG00000009376		ENSMUSG00000009075		ENSMUSG00000100586	Vmn1r90
ENSMUSG00000051599		ENSMUSG00000093773		ENSMUSG00000009376		ENSMUSG00000051599	Pcdhb2
ENSMUSG00000073418		ENSMUSG00000009075		ENSMUSG00000009471		ENSMUSG00000073418	C4b
ENSMUSG00000109006		ENSMUSG00000051599		ENSMUSG00000010825		ENSMUSG00000109006	B230209E15Rik
ENSMUSG00000020891		ENSMUSG00000073418		ENSMUSG00000011256		ENSMUSG00000020891	Alox8
ENSMUSG00000041828		ENSMUSG00000109006		ENSMUSG00000013523		ENSMUSG00000041828	Abca8a
ENSMUSG00000025888		ENSMUSG00000041828		ENSMUSG00000015568		ENSMUSG00000025888	Casp1
ENSMUSG00000093773		ENSMUSG00000115529		ENSMUSG00000016496		ENSMUSG00000093773	Obox3-ps7
ENSMUSG00000044043		ENSMUSG00000051242		ENSMUSG00000017400		ENSMUSG00000044043	Pcdhb14
ENSMUSG00000051242		ENSMUSG00000025888		ENSMUSG00000018339		ENSMUSG00000051242	Pcdhb9
ENSMUSG00000040565		ENSMUSG00000020891		ENSMUSG00000018470		ENSMUSG00000040565	Btaf1
ENSMUSG00000115529		ENSMUSG00000104420		ENSMUSG00000018589		ENSMUSG00000115529	9630013A20Rik
ENSMUSG00000030223		ENSMUSG00000027356		ENSMUSG00000018593		ENSMUSG00000030223	Ptpro
ENSMUSG00000104420		ENSMUSG00000040565		ENSMUSG00000019232		ENSMUSG00000104420	E230020A03Rik
ENSMUSG00000045876		ENSMUSG00000047945		ENSMUSG00000019888		ENSMUSG00000045876	Pcdhb8
ENSMUSG00000040649		ENSMUSG00000045876		ENSMUSG00000020396		ENSMUSG00000040649	Rimklb
ENSMUSG00000051678		ENSMUSG00000068696		ENSMUSG00000020732		ENSMUSG00000051678	Pcdhb6
ENSMUSG00000113342		ENSMUSG00000030223		ENSMUSG00000020836		ENSMUSG00000113342	AA414992
ENSMUSG00000051486		ENSMUSG00000004707		ENSMUSG00000020846		ENSMUSG00000051486	Pcdhb11
ENSMUSG00000045689		ENSMUSG00000044043		ENSMUSG00000020848		ENSMUSG00000045689	Pcdhb4
ENSMUSG00000063687		ENSMUSG00000051678		ENSMUSG00000020891		ENSMUSG00000063687	Pcdhb5
ENSMUSG00000047945		ENSMUSG00000045689		ENSMUSG00000020905		ENSMUSG00000047945	Marcksl1
ENSMUSG00000052504		ENSMUSG00000052504		ENSMUSG00000021070		ENSMUSG00000052504	Epha3
ENSMUSG00000068696		ENSMUSG00000095041		ENSMUSG00000021203		ENSMUSG00000068696	Gpr88
ENSMUSG00000073590		ENSMUSG00000090667		ENSMUSG00000021803		ENSMUSG00000073590	3222401L13Rik
ENSMUSG00000105594		ENSMUSG00000063687		ENSMUSG00000022076		ENSMUSG00000105594	Gm43398
ENSMUSG00000027356		ENSMUSG00000073530		ENSMUSG00000022656		ENSMUSG00000027356	Fermt1
ENSMUSG00000073530		ENSMUSG00000102516		ENSMUSG00000023067		ENSMUSG00000073530	Pappa2
ENSMUSG00000103332		ENSMUSG00000051486		ENSMUSG00000023963		ENSMUSG00000103332	Pcdhga2
ENSMUSG00000103897		ENSMUSG00000105594		ENSMUSG00000024411		ENSMUSG00000103897	Pcdhga8
ENSMUSG00000004707		ENSMUSG00000104264		ENSMUSG00000024501		ENSMUSG00000004707	Ly9
ENSMUSG00000029826		ENSMUSG00000044726		ENSMUSG00000024529		ENSMUSG00000029826	Zc3hav1
ENSMUSG00000116525		ENSMUSG00000026452		ENSMUSG00000024647		ENSMUSG00000116525	Gm30371
ENSMUSG00000087620		ENSMUSG00000040649		ENSMUSG00000024736		ENSMUSG00000087620	5330434G04Rik
ENSMUSG00000096107		ENSMUSG00000116525		ENSMUSG00000025128		ENSMUSG00000096107	Gm16505
ENSMUSG00000104264		ENSMUSG00000004894		ENSMUSG00000025888		ENSMUSG00000104264	Gm18529
ENSMUSG00000102516		ENSMUSG00000028222		ENSMUSG00000025905		ENSMUSG00000102516	Gm38340
ENSMUSG00000076431		ENSMUSG00000073590		ENSMUSG00000026344		ENSMUSG00000076431	Sox4
ENSMUSG00000090667		ENSMUSG00000096107		ENSMUSG00000026365		ENSMUSG00000090667	Mdfic2
ENSMUSG00000044726		ENSMUSG00000028487		ENSMUSG00000026676		ENSMUSG00000044726	Erich5
ENSMUSG00000030256		ENSMUSG00000103332		ENSMUSG00000026697		ENSMUSG00000030256	Bhlhe41
ENSMUSG00000095041		ENSMUSG00000113651		ENSMUSG00000026822		ENSMUSG00000095041	ENSMUSG00000095041
ENSMUSG00000017400		ENSMUSG00000085773		ENSMUSG00000026830		ENSMUSG00000017400	Stac2
ENSMUSG00000041608		ENSMUSG00000103897		ENSMUSG00000027004		ENSMUSG00000041608	Entpd3
ENSMUSG00000104674		ENSMUSG00000017400		ENSMUSG00000027199		ENSMUSG00000104674	Gm42756
ENSMUSG00000004894		ENSMUSG00000060962		ENSMUSG00000027253		ENSMUSG00000004894	Hapln2
ENSMUSG00000046743		ENSMUSG00000010825		ENSMUSG00000027669		ENSMUSG00000046743	Fat4
ENSMUSG00000020732		ENSMUSG00000026344		ENSMUSG00000027848		ENSMUSG00000020732	Rab37
ENSMUSG00000024501		ENSMUSG00000069662		ENSMUSG00000028222		ENSMUSG00000024501	Dpysl3
ENSMUSG00000028487		ENSMUSG00000046743		ENSMUSG00000028487		ENSMUSG00000028487	Bnc2
ENSMUSG00000086181		ENSMUSG00000030256		ENSMUSG00000028631		ENSMUSG00000086181	C230034O21Rik
ENSMUSG00000026452		ENSMUSG00000024501		ENSMUSG00000029307		ENSMUSG00000026452	Syt2
ENSMUSG00000059182		ENSMUSG00000076431		ENSMUSG00000029826		ENSMUSG00000059182	Skap2
ENSMUSG00000056656		ENSMUSG00000109209		ENSMUSG00000030077		ENSMUSG00000056656	Apol8
ENSMUSG00000110020		ENSMUSG00000104674		ENSMUSG00000030110		ENSMUSG00000110020	Gm45441
ENSMUSG00000010825		ENSMUSG00000087620		ENSMUSG00000030223		ENSMUSG00000010825	Grid2ip
ENSMUSG00000024339		ENSMUSG00000020732		ENSMUSG00000030256		ENSMUSG00000024339	Tap2
ENSMUSG00000021585		ENSMUSG00000067203		ENSMUSG00000030337		ENSMUSG00000021585	Cast
ENSMUSG00000026344		ENSMUSG00000103882		ENSMUSG00000030701		ENSMUSG00000026344	Lypd1
ENSMUSG00000063632		ENSMUSG00000063804		ENSMUSG00000030787		ENSMUSG00000063632	Sox11
ENSMUSG00000027004		ENSMUSG00000086181		ENSMUSG00000031543		ENSMUSG00000027004	Frzb
ENSMUSG00000025366		ENSMUSG00000029826		ENSMUSG00000032012		ENSMUSG00000025366	Esyt1
ENSMUSG00000063804		ENSMUSG00000022656		ENSMUSG00000032174		ENSMUSG00000063804	Lin28b
ENSMUSG00000103793		ENSMUSG00000112968		ENSMUSG00000032373		ENSMUSG00000103793	Pcdhga6
ENSMUSG00000112968		ENSMUSG00000058498		ENSMUSG00000032500		ENSMUSG00000112968	Gm48530
ENSMUSG00000113651		ENSMUSG00000036777		ENSMUSG00000032517		ENSMUSG00000113651	Gm4900
ENSMUSG00000058498		ENSMUSG00000098097		ENSMUSG00000032554		ENSMUSG00000058498	Rnf207
ENSMUSG00000098097		ENSMUSG00000052229		ENSMUSG00000032936		ENSMUSG00000098097	6530403H02Rik
ENSMUSG00000069662		ENSMUSG00000039474		ENSMUSG00000033006		ENSMUSG00000069662	Marcks
ENSMUSG00000103882		ENSMUSG00000104572		ENSMUSG00000033730		ENSMUSG00000103882	Gm37452
ENSMUSG00000028222		ENSMUSG00000025479		ENSMUSG00000034098		ENSMUSG00000028222	Calb1
ENSMUSG00000052469		ENSMUSG00000063632		ENSMUSG00000034460		ENSMUSG00000067203	H2-K2
ENSMUSG00000067203		ENSMUSG00000027004		ENSMUSG00000034768		ENSMUSG00000073411	H2-D1
ENSMUSG00000073411		ENSMUSG00000042834		ENSMUSG00000034872		ENSMUSG00000039474	Wfs1
ENSMUSG00000039474		ENSMUSG00000041608		ENSMUSG00000034997		ENSMUSG00000044667	Plppr4
ENSMUSG00000044667		ENSMUSG00000021585		ENSMUSG00000035168		ENSMUSG00000022656	Nectin3
ENSMUSG00000022656		ENSMUSG00000091712		ENSMUSG00000035202		ENSMUSG00000084350	Znf41-ps
ENSMUSG00000084350		ENSMUSG00000103793		ENSMUSG00000035258		ENSMUSG00000026414	Tnnt2
ENSMUSG00000026414		ENSMUSG00000072663		ENSMUSG00000035274		ENSMUSG00000104093	A330015K06Rik
ENSMUSG00000104093		ENSMUSG00000104093		ENSMUSG00000035860		ENSMUSG00000024598	Fbn2
ENSMUSG00000024598		ENSMUSG00000034533		ENSMUSG00000035929		ENSMUSG00000042817	Flt3
ENSMUSG00000042817		ENSMUSG00000029816		ENSMUSG00000036095		ENSMUSG00000090799	Klhl33
ENSMUSG00000090799		ENSMUSG00000094910		ENSMUSG00000036098		ENSMUSG00000043458	Pcdhb12
ENSMUSG00000043458		ENSMUSG00000047205		ENSMUSG00000036422		ENSMUSG00000085773	Gm16233
ENSMUSG00000085773		ENSMUSG00000026414		ENSMUSG00000036777		ENSMUSG00000029816	Gpnmb
ENSMUSG00000029816		ENSMUSG00000025366		ENSMUSG00000037280		ENSMUSG00000076441	Ass1
ENSMUSG00000076441		ENSMUSG00000057606		ENSMUSG00000037416		ENSMUSG00000040118	Cacna2d1
ENSMUSG00000040118		ENSMUSG00000036095		ENSMUSG00000037541		ENSMUSG00000038128	Camk4
ENSMUSG00000038128		ENSMUSG00000056656		ENSMUSG00000038007		ENSMUSG00000072663	Spef2
ENSMUSG00000072663		ENSMUSG00000044667		ENSMUSG00000038128		ENSMUSG00000109209	Gm45104
ENSMUSG00000109209		ENSMUSG00000073164		ENSMUSG00000038257		ENSMUSG00000052581	Lrrtm4
ENSMUSG00000052581		ENSMUSG00000046607		ENSMUSG00000038370		ENSMUSG00000045083	Lingo2
ENSMUSG00000045083		ENSMUSG00000044352		ENSMUSG00000038530		ENSMUSG00000056306	Sertm1
ENSMUSG00000056306		ENSMUSG00000056306		ENSMUSG00000039087		ENSMUSG00000091712	Sec14l5
ENSMUSG00000091712		ENSMUSG00000034151		ENSMUSG00000039372		ENSMUSG00000047307	Pcdhb13
ENSMUSG00000047307		ENSMUSG00000110020		ENSMUSG00000039474		ENSMUSG00000042834	Nrep
ENSMUSG00000042834		ENSMUSG00000031543		ENSMUSG00000039904		ENSMUSG00000026399	Cd55
ENSMUSG00000026399		ENSMUSG00000011256		ENSMUSG00000040183		ENSMUSG00000060962	Dmkn
ENSMUSG00000060962		ENSMUSG00000027199		ENSMUSG00000040428		ENSMUSG00000015879	Fam184b
ENSMUSG00000015879		ENSMUSG00000022483		ENSMUSG00000040565		ENSMUSG00000031543	Ank1
ENSMUSG00000031543		ENSMUSG00000024598		ENSMUSG00000040972		ENSMUSG00000036777	Anln
ENSMUSG00000036777		ENSMUSG00000084843		ENSMUSG00000041046		ENSMUSG00000047658	Gal3st3
ENSMUSG00000047658		ENSMUSG00000030337		ENSMUSG00000041120		ENSMUSG00000047205	Dusp18
ENSMUSG00000047205		ENSMUSG00000095616		ENSMUSG00000041431		ENSMUSG00000106644	Gm40331
ENSMUSG00000106644		ENSMUSG00000039457		ENSMUSG00000041596		ENSMUSG00000052229	Gpr17
ENSMUSG00000052229		ENSMUSG00000046093		ENSMUSG00000041608		ENSMUSG00000015568	Lpl
ENSMUSG00000015568		ENSMUSG00000015568		ENSMUSG00000041695		ENSMUSG00000002341	Ncan
ENSMUSG00000002341		ENSMUSG00000059187		ENSMUSG00000041828		ENSMUSG00000064115	Cadm2
ENSMUSG00000064115		ENSMUSG00000046844		ENSMUSG00000041923		ENSMUSG00000059327	Eda
ENSMUSG00000059327		ENSMUSG00000047307		ENSMUSG00000042524		ENSMUSG00000030513	Pcsk6
ENSMUSG00000030513		ENSMUSG00000059182		ENSMUSG00000042529		ENSMUSG00000020681	Ace
ENSMUSG00000020681		ENSMUSG00000058420		ENSMUSG00000042817		ENSMUSG00000028555	Ttc39a
ENSMUSG00000028555		ENSMUSG00000032554		ENSMUSG00000042834		ENSMUSG00000046607	Hrk
ENSMUSG00000046607		ENSMUSG00000062372		ENSMUSG00000043557		ENSMUSG00000058420	Syt17
ENSMUSG00000058420		ENSMUSG00000021070		ENSMUSG00000044352		ENSMUSG00000084843	B230312C02Rik
ENSMUSG00000084843		ENSMUSG00000007682		ENSMUSG00000044469		ENSMUSG00000034151	Zbbx
ENSMUSG00000034151		ENSMUSG00000084350		ENSMUSG00000044667		ENSMUSG00000053411	Cbx7
ENSMUSG00000053411		ENSMUSG00000024339		ENSMUSG00000044726		ENSMUSG00000021280	Exoc3l4
ENSMUSG00000021280		ENSMUSG00000021280		ENSMUSG00000044847		ENSMUSG00000061232	H2-K1
ENSMUSG00000061232		ENSMUSG00000090799		ENSMUSG00000045441		ENSMUSG00000047632	Fgfbp3
ENSMUSG00000047632		ENSMUSG00000047786		ENSMUSG00000046093		ENSMUSG00000107677	Olfr316
ENSMUSG00000107677		ENSMUSG00000042817		ENSMUSG00000046480		ENSMUSG00000038507	Parp12
ENSMUSG00000038507		ENSMUSG00000001506		ENSMUSG00000046607		ENSMUSG00000094910	D430019H16Rik
ENSMUSG00000094910		ENSMUSG00000026043		ENSMUSG00000046743		ENSMUSG00000028364	Tnc
ENSMUSG00000028364		ENSMUSG00000006522		ENSMUSG00000047205		ENSMUSG00000019768	Esr1
ENSMUSG00000019768		ENSMUSG00000002341		ENSMUSG00000047632		ENSMUSG00000002459	Rgs20
ENSMUSG00000002459		ENSMUSG00000090061		ENSMUSG00000047786		ENSMUSG00000059187	Tafa1
ENSMUSG00000059187		ENSMUSG00000028555		ENSMUSG00000047797		ENSMUSG00000110649	Gm40466
ENSMUSG00000110649		ENSMUSG00000106644		ENSMUSG00000047945		ENSMUSG00000057606	Colq
ENSMUSG00000057606		ENSMUSG00000107677		ENSMUSG00000048644		ENSMUSG00000040364	Sec1
ENSMUSG00000040364		ENSMUSG00000040364		ENSMUSG00000049281		ENSMUSG00000031099	Smarca1
ENSMUSG00000031099		ENSMUSG00000091680		ENSMUSG00000050423		ENSMUSG00000016496	Cd274
ENSMUSG00000016496		ENSMUSG00000027536		ENSMUSG00000051323		ENSMUSG00000046844	Vat1l
ENSMUSG00000046844		ENSMUSG00000113784		ENSMUSG00000052229		ENSMUSG00000011256	Adam19
ENSMUSG00000011256		ENSMUSG00000076441		ENSMUSG00000052504		ENSMUSG00000031558	Slit2
ENSMUSG00000031558		ENSMUSG00000073411		ENSMUSG00000052565		ENSMUSG00000044352	Sowaha
ENSMUSG00000044352		ENSMUSG00000104454		ENSMUSG00000053963		ENSMUSG00000086596	Susd5
ENSMUSG00000086596		ENSMUSG00000061232		ENSMUSG00000056306		ENSMUSG00000091680	Klhdc7b
ENSMUSG00000091680		ENSMUSG00000114189		ENSMUSG00000056656		ENSMUSG00000113429	Gm20063
ENSMUSG00000113429		ENSMUSG00000030077		ENSMUSG00000056820		ENSMUSG00000002900	Lamb1
ENSMUSG00000002900		ENSMUSG00000052581		ENSMUSG00000056999		ENSMUSG00000045441	Gprin3
ENSMUSG00000045441		ENSMUSG00000047117		ENSMUSG00000058385		ENSMUSG00000028631	Kcnq4
ENSMUSG00000028631		ENSMUSG00000052912		ENSMUSG00000058571		ENSMUSG00000051652	Lrrc3
ENSMUSG00000051652		ENSMUSG00000028630		ENSMUSG00000058897		ENSMUSG00000022483	Col2a1
ENSMUSG00000022483		ENSMUSG00000103472		ENSMUSG00000059361		ENSMUSG00000039457	Ppl
ENSMUSG00000039457		ENSMUSG00000038530		ENSMUSG00000059991		ENSMUSG00000034533	Scn10a
ENSMUSG00000060550		ENSMUSG00000026519		ENSMUSG00000061232		ENSMUSG00000026519	Tmem63a
ENSMUSG00000034533		ENSMUSG00000031558		ENSMUSG00000061808		ENSMUSG00000062372	Otof
ENSMUSG00000026519		ENSMUSG00000034872		ENSMUSG00000062372		ENSMUSG00000032500	Dclk3
ENSMUSG00000062372		ENSMUSG00000051323		ENSMUSG00000063415		ENSMUSG00000097604	Gm17322
ENSMUSG00000032500		ENSMUSG00000024736		ENSMUSG00000063632		ENSMUSG00000036095	Dgkb
ENSMUSG00000097604		ENSMUSG00000059327		ENSMUSG00000063804		ENSMUSG00000045912	C2cd4c
ENSMUSG00000036095		ENSMUSG00000097178		ENSMUSG00000064339		ENSMUSG00000049538	Adamts16
ENSMUSG00000045912		ENSMUSG00000032174		ENSMUSG00000064945		ENSMUSG00000036923	Stox1
ENSMUSG00000049538		ENSMUSG00000046480		ENSMUSG00000067203		ENSMUSG00000025479	Cyp2e1
ENSMUSG00000036923		ENSMUSG00000035168		ENSMUSG00000067996		ENSMUSG00000002147	Stat6
ENSMUSG00000025479		ENSMUSG00000040929		ENSMUSG00000068696		ENSMUSG00000026043	Col3a1
ENSMUSG00000002147		ENSMUSG00000045441		ENSMUSG00000069662		ENSMUSG00000021070	Bdkrb2
ENSMUSG00000026043		ENSMUSG00000075014		ENSMUSG00000070436		ENSMUSG00000030110	Ret
ENSMUSG00000021070		ENSMUSG00000036098		ENSMUSG00000071379		ENSMUSG00000036006	Ripor2
ENSMUSG00000030110		ENSMUSG00000074575		ENSMUSG00000073164		ENSMUSG00000036422	Pcdh8
ENSMUSG00000036006		ENSMUSG00000019768		ENSMUSG00000073411		ENSMUSG00000073164	2410018L13Rik
ENSMUSG00000036422		ENSMUSG00000021214		ENSMUSG00000073418		ENSMUSG00000085526	Gm16083
ENSMUSG00000073164		ENSMUSG00000097604		ENSMUSG00000074489		ENSMUSG00000084898	Gm12371
ENSMUSG00000085526		ENSMUSG00000041923		ENSMUSG00000074575		ENSMUSG00000110249	9330121K16Rik
ENSMUSG00000084898		ENSMUSG00000074489		ENSMUSG00000074634		ENSMUSG00000064215	Ifi27
ENSMUSG00000110249		ENSMUSG00000016496		ENSMUSG00000075012		ENSMUSG00000028630	Dyrk2
ENSMUSG00000064215		ENSMUSG00000002459		ENSMUSG00000076431		ENSMUSG00000104454	Gm37827
ENSMUSG00000028630		ENSMUSG00000026399		ENSMUSG00000076612		ENSMUSG00000034872	Gipc3
ENSMUSG00000104454		ENSMUSG00000074892		ENSMUSG00000078137		ENSMUSG00000006522	Itih3
ENSMUSG00000034872		ENSMUSG00000028364		ENSMUSG00000078502		ENSMUSG00000015852	Fcrls
ENSMUSG00000006522		ENSMUSG00000091898		ENSMUSG00000083877		ENSMUSG00000004031	Brinp2
ENSMUSG00000015852		ENSMUSG00000036422		ENSMUSG00000084350		ENSMUSG00000025128	Bhlhe22
ENSMUSG00000004031		ENSMUSG00000020396		ENSMUSG00000084898		ENSMUSG00000035929	H2-Q4
ENSMUSG00000025128		ENSMUSG00000105891		ENSMUSG00000085235		ENSMUSG00000051323	Pcdh19
ENSMUSG00000035929		ENSMUSG00000110649		ENSMUSG00000086596		ENSMUSG00000103472	Pcdhga7
ENSMUSG00000051323		ENSMUSG00000102440		ENSMUSG00000087620		ENSMUSG00000104572	Fbxw23
ENSMUSG00000103472		ENSMUSG00000086844		ENSMUSG00000090667		ENSMUSG00000074575	Kcng1
ENSMUSG00000104572		ENSMUSG00000015852		ENSMUSG00000090799		ENSMUSG00000014592	Camta1
ENSMUSG00000074575		ENSMUSG00000053093		ENSMUSG00000091680		ENSMUSG00000027199	Gatm
ENSMUSG00000014592		ENSMUSG00000030110		ENSMUSG00000091712		ENSMUSG00000061186	Sfmbt2
ENSMUSG00000027199		ENSMUSG00000045083		ENSMUSG00000092274		ENSMUSG00000040929	Rfx3
ENSMUSG00000061186		ENSMUSG00000066129		ENSMUSG00000094910		ENSMUSG00000030337	Vamp1
ENSMUSG00000040929		ENSMUSG00000024621		ENSMUSG00000095041		ENSMUSG00000031605	Klhl2
ENSMUSG00000030337		ENSMUSG00000043458		ENSMUSG00000095562		ENSMUSG00000028753	Vwa5b1
ENSMUSG00000031605		ENSMUSG00000020914		ENSMUSG00000097604		ENSMUSG00000047786	Lix1
ENSMUSG00000028753		ENSMUSG00000022464		ENSMUSG00000098973		ENSMUSG00000021214	Akr1c18
ENSMUSG00000047786		ENSMUSG00000041120		ENSMUSG00000100586		ENSMUSG00000025738	Fbxl16
ENSMUSG00000021214		ENSMUSG00000049538		ENSMUSG00000102813		ENSMUSG00000054509	Parp4
ENSMUSG00000025738		ENSMUSG00000033295		ENSMUSG00000104674		ENSMUSG00000032323	Cyp11a1
ENSMUSG00000054509		ENSMUSG00000028906		ENSMUSG00000105594		ENSMUSG00000022773	Ypel1
ENSMUSG00000032323		ENSMUSG00000033740		ENSMUSG00000105891		ENSMUSG00000105891	A230001M10Rik
ENSMUSG00000022773		ENSMUSG00000035929		ENSMUSG00000107677		ENSMUSG00000006411	Nectin4
ENSMUSG00000105891		ENSMUSG00000031099		ENSMUSG00000109006		ENSMUSG00000052374	Actn2
ENSMUSG00000006411		ENSMUSG00000037280		ENSMUSG00000109792		ENSMUSG00000023800	Tiam2
ENSMUSG00000052374		ENSMUSG00000022773		ENSMUSG00000110027		ENSMUSG00000004637	Wwox
ENSMUSG00000023800		ENSMUSG00000022053		ENSMUSG00000110246		ENSMUSG00000024736	Tmem132a
ENSMUSG00000004637		ENSMUSG00000018593		ENSMUSG00000110924		ENSMUSG00000031355	Arhgap6
ENSMUSG00000024736		ENSMUSG00000023963		ENSMUSG00000112276		ENSMUSG00000045062	Pcdhb7
ENSMUSG00000031355		ENSMUSG00000015134		ENSMUSG00000113429		ENSMUSG00000103677	Pcdhga4
ENSMUSG00000045062		ENSMUSG00000038128		ENSMUSG00000113651		ENSMUSG00000074591	Ankub1
ENSMUSG00000103677		ENSMUSG00000047632		ENSMUSG00000113920		ENSMUSG00000066129	Kndc1
ENSMUSG00000074591		ENSMUSG00000044783		ENSMUSG00000116081		ENSMUSG00000031137	Fgf13
ENSMUSG00000066129		ENSMUSG00000084898		ENSMUSG00000116525		ENSMUSG00000037855	Zfp365
ENSMUSG00000031137		ENSMUSG00000032936		ENSMUSG00000119353		ENSMUSG00000053093	Myh7
ENSMUSG00000037855		ENSMUSG00000085526		ENSMUSG00000119584		ENSMUSG00000002997	Prkar2b
ENSMUSG00000053093		ENSMUSG00000030513		ENSMUSG00000000531		ENSMUSG00000023963	Cyp39a1
ENSMUSG00000002997		ENSMUSG00000063383		ENSMUSG00000006362		ENSMUSG00000041923	Nol4
ENSMUSG00000023963		ENSMUSG00000037855		ENSMUSG00000019768		ENSMUSG00000032174	Icam5
ENSMUSG00000055197		ENSMUSG00000028631		ENSMUSG00000021091		ENSMUSG00000033740	St18
ENSMUSG00000041923		ENSMUSG00000113920		ENSMUSG00000021732		ENSMUSG00000021259	Cyp46a1
ENSMUSG00000032174		ENSMUSG00000102543		ENSMUSG00000026043		ENSMUSG00000050944	Efcab5
ENSMUSG00000033740		ENSMUSG00000022187		ENSMUSG00000026414		ENSMUSG00000037280	Galnt6
ENSMUSG00000021259		ENSMUSG00000058897		ENSMUSG00000027210		ENSMUSG00000002032	Tmem25
ENSMUSG00000050944		ENSMUSG00000086596		ENSMUSG00000028630		ENSMUSG00000091898	Tnnc1
ENSMUSG00000037280		ENSMUSG00000032323		ENSMUSG00000031099		ENSMUSG00000059585	Ube2nl
ENSMUSG00000002032		ENSMUSG00000045180		ENSMUSG00000032690		ENSMUSG00000046093	Hpcal4
ENSMUSG00000091898		ENSMUSG00000045912		ENSMUSG00000034282		ENSMUSG00000044176	Spink10
ENSMUSG00000059585		ENSMUSG00000064215		ENSMUSG00000045180		ENSMUSG00000021733	Slc4a7
ENSMUSG00000046093		ENSMUSG00000059585		ENSMUSG00000045193		ENSMUSG00000074489	Bglap3
ENSMUSG00000044176		ENSMUSG00000044285		ENSMUSG00000047139		ENSMUSG00000075014	Gm10800
ENSMUSG00000021733		ENSMUSG00000092274		ENSMUSG00000047907		ENSMUSG00000022758	P2rx6
ENSMUSG00000074489		ENSMUSG00000023800		ENSMUSG00000047996		ENSMUSG00000049571	Cfap46
ENSMUSG00000075014		ENSMUSG00000050822		ENSMUSG00000053799		ENSMUSG00000074892	B3galt5
ENSMUSG00000022758		ENSMUSG00000111994		ENSMUSG00000058420		ENSMUSG00000033295	Ptprf
ENSMUSG00000049571		ENSMUSG00000025128		ENSMUSG00000058624		ENSMUSG00000047712	Ust
ENSMUSG00000074892		ENSMUSG00000044176		ENSMUSG00000070348		ENSMUSG00000030134	Rasgef1a
ENSMUSG00000073929		ENSMUSG00000074151		ENSMUSG00000074591		ENSMUSG00000043822	Adamtsl5
ENSMUSG00000038932		ENSMUSG00000074591		ENSMUSG00000074896		ENSMUSG00000050822	Slc29a4
ENSMUSG00000033295		ENSMUSG00000026354		ENSMUSG00000075031		ENSMUSG00000021130	Galnt16
ENSMUSG00000047712		ENSMUSG00000002900		ENSMUSG00000084843		ENSMUSG00000086844	B230206H07Rik
ENSMUSG00000030134		ENSMUSG00000070327		ENSMUSG00000086844		ENSMUSG00000090061	Nwd2
ENSMUSG00000043822		ENSMUSG00000031137		ENSMUSG00000110631		ENSMUSG00000102440	Pcdhga9
ENSMUSG00000050822		ENSMUSG00000064115		ENSMUSG00000000392		ENSMUSG00000031563	Wwc2
ENSMUSG00000021130		ENSMUSG00000032500		ENSMUSG00000025213		ENSMUSG00000022883	Robo1
ENSMUSG00000086844		ENSMUSG00000070564		ENSMUSG00000026630		ENSMUSG00000103483	Gm20162
ENSMUSG00000090061		ENSMUSG00000030577		ENSMUSG00000027962		ENSMUSG00000037321	Tap1
ENSMUSG00000102440		ENSMUSG00000074505		ENSMUSG00000027971		ENSMUSG00000055333	Fat2
ENSMUSG00000031563		ENSMUSG00000058571		ENSMUSG00000034714		ENSMUSG00000052087	Rgs14
ENSMUSG00000022883		ENSMUSG00000113429		ENSMUSG00000035783		ENSMUSG00000007682	Dio2
ENSMUSG00000103483		ENSMUSG00000061186		ENSMUSG00000037833		ENSMUSG00000035967	Ints6l
ENSMUSG00000037321		ENSMUSG00000110027		ENSMUSG00000039081		ENSMUSG00000026170	Cyp27a1
ENSMUSG00000046764		ENSMUSG00000022421		ENSMUSG00000047759		ENSMUSG00000028541	B4galt2
ENSMUSG00000055333		ENSMUSG00000045062		ENSMUSG00000049493		ENSMUSG00000030077	Chl1
ENSMUSG00000052087		ENSMUSG00000021340		ENSMUSG00000049571		ENSMUSG00000062743	Zfp677
ENSMUSG00000007682		ENSMUSG00000049571		ENSMUSG00000051652		ENSMUSG00000026994	Galnt3
ENSMUSG00000035967		ENSMUSG00000089679		ENSMUSG00000052087		ENSMUSG00000044783	Hjurp
ENSMUSG00000026170		ENSMUSG00000103749		ENSMUSG00000058672		ENSMUSG00000100009	Gm7967
ENSMUSG00000028541		ENSMUSG00000035860		ENSMUSG00000061086		ENSMUSG00000041120	Nbl1
ENSMUSG00000030077		ENSMUSG00000100009		ENSMUSG00000073530		ENSMUSG00000027536	Chmp4c
ENSMUSG00000062743		ENSMUSG00000015879		ENSMUSG00000076609		ENSMUSG00000017417	Plxdc1
ENSMUSG00000026994		ENSMUSG00000055333		ENSMUSG00000091636		ENSMUSG00000015134	Aldh1a3
ENSMUSG00000044783		ENSMUSG00000006411		ENSMUSG00000102516		ENSMUSG00000070867	Trabd2b
ENSMUSG00000100009		ENSMUSG00000004637		ENSMUSG00000119446		ENSMUSG00000020102	Slc16a7
ENSMUSG00000041120		ENSMUSG00000018470		ENSMUSG00000020160		ENSMUSG00000021340	Gpld1
ENSMUSG00000027536		ENSMUSG00000027253		ENSMUSG00000022505		ENSMUSG00000035168	Tanc1
ENSMUSG00000017417		ENSMUSG00000103483		ENSMUSG00000022894		ENSMUSG00000038530	Rgs4
ENSMUSG00000015134		ENSMUSG00000022208		ENSMUSG00000027750		ENSMUSG00000104597	B230334C09Rik
ENSMUSG00000070867		ENSMUSG00000037321		ENSMUSG00000034686		ENSMUSG00000058881	Zfp516
ENSMUSG00000020102		ENSMUSG00000079465		ENSMUSG00000035397		ENSMUSG00000097178	2310002F09Rik
ENSMUSG00000021340		ENSMUSG00000118866		ENSMUSG00000036904		ENSMUSG00000098128	Gm3693
ENSMUSG00000035168		ENSMUSG00000052087		ENSMUSG00000040929		ENSMUSG00000038702	Dsel
ENSMUSG00000038530		ENSMUSG00000075296		ENSMUSG00000041261		ENSMUSG00000083889	E530001F21Rik
ENSMUSG00000105948		ENSMUSG00000044847		ENSMUSG00000047261		ENSMUSG00000102543	Pcdhgc5
ENSMUSG00000104597		ENSMUSG00000024053		ENSMUSG00000048015		ENSMUSG00000114189	9330199G10Rik
ENSMUSG00000058881		ENSMUSG00000053963		ENSMUSG00000049164		ENSMUSG00000022464	Slc38a4
ENSMUSG00000097178		ENSMUSG00000047658		ENSMUSG00000050600		ENSMUSG00000000794	Kcnn3
ENSMUSG00000098128		ENSMUSG00000047797		ENSMUSG00000052135		ENSMUSG00000026042	Col5a2
ENSMUSG00000038702		ENSMUSG00000020848		ENSMUSG00000059327		ENSMUSG00000032554	Trf
ENSMUSG00000083889		ENSMUSG00000028259		ENSMUSG00000066705		ENSMUSG00000074151	Nlrc5
ENSMUSG00000102543		ENSMUSG00000033880		ENSMUSG00000090061		ENSMUSG00000032936	Camkv
ENSMUSG00000114189		ENSMUSG00000103677		ENSMUSG00000092048		ENSMUSG00000070564	Ntn5
ENSMUSG00000022464		ENSMUSG00000053411		ENSMUSG00000118154		ENSMUSG00000034768	Asb16
ENSMUSG00000000794		ENSMUSG00000070687		ENSMUSG00000000792		ENSMUSG00000026354	Lct
ENSMUSG00000026042		ENSMUSG00000114479		ENSMUSG00000010021		ENSMUSG00000044912	Syt16
ENSMUSG00000032554		ENSMUSG00000034768		ENSMUSG00000018830		ENSMUSG00000020848	Doc2b
ENSMUSG00000074151		ENSMUSG00000042524		ENSMUSG00000020486		ENSMUSG00000049164	Zfp518a
ENSMUSG00000032936		ENSMUSG00000052374		ENSMUSG00000022208		ENSMUSG00000058897	Col25a1
ENSMUSG00000070564		ENSMUSG00000021130		ENSMUSG00000022372		ENSMUSG00000034684	Sema3f
ENSMUSG00000034768		ENSMUSG00000026994		ENSMUSG00000024810		ENSMUSG00000032036	Kirrel3
ENSMUSG00000026354		ENSMUSG00000103088		ENSMUSG00000028555		ENSMUSG00000047117	Ankdd1b
ENSMUSG00000044912		ENSMUSG00000036006		ENSMUSG00000028971		ENSMUSG00000028176	Lrrc7
ENSMUSG00000020848		ENSMUSG00000027848		ENSMUSG00000029581		ENSMUSG00000053199	Arhgap20
ENSMUSG00000049164		ENSMUSG00000033590		ENSMUSG00000034755		ENSMUSG00000057182	Scn3a
ENSMUSG00000058897		ENSMUSG00000083889		ENSMUSG00000043252		ENSMUSG00000052912	Smarca5-ps
ENSMUSG00000034684		ENSMUSG00000038507		ENSMUSG00000045087		ENSMUSG00000110027	C030029H02Rik
ENSMUSG00000032036		ENSMUSG00000049281		ENSMUSG00000049538		ENSMUSG00000050423	Ppp1r3g
ENSMUSG00000047117		ENSMUSG00000051652		ENSMUSG00000073514		ENSMUSG00000027848	Olfml3
ENSMUSG00000028176		ENSMUSG00000027750		ENSMUSG00000073680		ENSMUSG00000036863	Syde2
ENSMUSG00000053199		ENSMUSG00000038370		ENSMUSG00000074505		ENSMUSG00000036098	Myrf
ENSMUSG00000057182		ENSMUSG00000109792		ENSMUSG00000114189		ENSMUSG00000024621	Csf1r
ENSMUSG00000052912		ENSMUSG00000031355		ENSMUSG00000019194		ENSMUSG00000026833	Olfm1
ENSMUSG00000110027		ENSMUSG00000040118		ENSMUSG00000020601		ENSMUSG00000079084	Ccdc82
ENSMUSG00000050423		ENSMUSG00000022758		ENSMUSG00000021214		ENSMUSG00000113784	Gm46400
ENSMUSG00000027848		ENSMUSG00000090486		ENSMUSG00000025789		ENSMUSG00000054920	Klhl5
ENSMUSG00000036863		ENSMUSG00000022883		ENSMUSG00000031239		ENSMUSG00000057554	Lgals8
ENSMUSG00000036098		ENSMUSG00000029605		ENSMUSG00000038702		ENSMUSG00000020160	Meis1
ENSMUSG00000024621		ENSMUSG00000031241		ENSMUSG00000045912		ENSMUSG00000028906	Epb41
ENSMUSG00000026833		ENSMUSG00000020160		ENSMUSG00000096768		ENSMUSG00000022208	Jph4
ENSMUSG00000079084		ENSMUSG00000024411		ENSMUSG00000024887		ENSMUSG00000095616	Gm26244
ENSMUSG00000113784		ENSMUSG00000105966		ENSMUSG00000025278		ENSMUSG00000030209	Grin2b
ENSMUSG00000054920		ENSMUSG00000022636		ENSMUSG00000026864		ENSMUSG00000047797	Gjb1
ENSMUSG00000057554		ENSMUSG00000026170		ENSMUSG00000031382		ENSMUSG00000058571	Gpc6
ENSMUSG00000020160		ENSMUSG00000038702		ENSMUSG00000031385		ENSMUSG00000022421	Nptxr
ENSMUSG00000028906		ENSMUSG00000034460		ENSMUSG00000033022		ENSMUSG00000022053	Ebf2
ENSMUSG00000022208		ENSMUSG00000026463		ENSMUSG00000037855		ENSMUSG00000033880	Lgals3bp
ENSMUSG00000095616		ENSMUSG00000036923		ENSMUSG00000059213		ENSMUSG00000020758	Itgb4
ENSMUSG00000055942		ENSMUSG00000038517		ENSMUSG00000064115		ENSMUSG00000020396	Nefh
ENSMUSG00000030209		ENSMUSG00000053199		ENSMUSG00000083889		ENSMUSG00000050910	Cdr2l
ENSMUSG00000047797		ENSMUSG00000055134		ENSMUSG00000097998		ENSMUSG00000022454	Nell2
ENSMUSG00000058571		ENSMUSG00000055027		ENSMUSG00000110390		ENSMUSG00000097083	D930019O06Rik
ENSMUSG00000022421		ENSMUSG00000039087		ENSMUSG00000000753		ENSMUSG00000020086	Macroh2a2
ENSMUSG00000022053		ENSMUSG00000017417		ENSMUSG00000021057		ENSMUSG00000030994	D7Ertd443e
ENSMUSG00000033880		ENSMUSG00000056116		ENSMUSG00000029657		ENSMUSG00000047419	Cmya5
ENSMUSG00000020758		ENSMUSG00000117864		ENSMUSG00000040339		ENSMUSG00000052707	Tnrc6a
ENSMUSG00000020396		ENSMUSG00000020080		ENSMUSG00000040649		ENSMUSG00000031837	Necab2
ENSMUSG00000055413		ENSMUSG00000020102		ENSMUSG00000041607		ENSMUSG00000103749	Pcdhgb5
ENSMUSG00000050910		ENSMUSG00000002944		ENSMUSG00000047658		ENSMUSG00000087266	Gm15991
ENSMUSG00000070421		ENSMUSG00000030209		ENSMUSG00000005397		ENSMUSG00000009471	Myod1
ENSMUSG00000022454		ENSMUSG00000002265		ENSMUSG00000022548		ENSMUSG00000111994	A330049N07Rik
ENSMUSG00000097083		ENSMUSG00000072591		ENSMUSG00000025823		ENSMUSG00000113560	Gm48519
ENSMUSG00000020086		ENSMUSG00000062743		ENSMUSG00000027875		ENSMUSG00000056116	H2-T22
ENSMUSG00000030994		ENSMUSG00000028860		ENSMUSG00000031283		ENSMUSG00000024053	Emilin2
ENSMUSG00000047419		ENSMUSG00000033196		ENSMUSG00000032128		ENSMUSG00000052155	Acvr2a
ENSMUSG00000052707		ENSMUSG00000043557		ENSMUSG00000051726		ENSMUSG00000036218	Pdzrn4
ENSMUSG00000025237		ENSMUSG00000050423		ENSMUSG00000066129		ENSMUSG00000044469	Tnfaip8l1
ENSMUSG00000031837		ENSMUSG00000104063		ENSMUSG00000068735		ENSMUSG00000047139	Cd24a
ENSMUSG00000103749		ENSMUSG00000071176		ENSMUSG00000105152		ENSMUSG00000033885	Pxk
ENSMUSG00000005251		ENSMUSG00000032172		ENSMUSG00000005087		ENSMUSG00000074505	Fat3
ENSMUSG00000087266		ENSMUSG00000110249		ENSMUSG00000024053		ENSMUSG00000037872	Ackr1
ENSMUSG00000009471		ENSMUSG00000056820		ENSMUSG00000031557		ENSMUSG00000046480	Scn4b
ENSMUSG00000052477		ENSMUSG00000026630		ENSMUSG00000037321		ENSMUSG00000103088	Pcdhgb6
ENSMUSG00000111994		ENSMUSG00000019194		ENSMUSG00000045733		ENSMUSG00000020914	Top2a
ENSMUSG00000113560		ENSMUSG00000085235		ENSMUSG00000062743		ENSMUSG00000022894	Adamts5
ENSMUSG00000056116		ENSMUSG00000053024		ENSMUSG00000064215		ENSMUSG00000089679	Gm16299
ENSMUSG00000024053		ENSMUSG00000059213		ENSMUSG00000025584		ENSMUSG00000070327	Rnf213
ENSMUSG00000052155		ENSMUSG00000026042		ENSMUSG00000025889		ENSMUSG00000029994	Anxa4
ENSMUSG00000036218		ENSMUSG00000112276		ENSMUSG00000038517		ENSMUSG00000034460	Six4
ENSMUSG00000044469		ENSMUSG00000034098		ENSMUSG00000074252		ENSMUSG00000036904	Fzd8
ENSMUSG00000047139		ENSMUSG00000073514		ENSMUSG00000112163		ENSMUSG00000041046	Ramp3
ENSMUSG00000033885		ENSMUSG00000029661		ENSMUSG00000004637		ENSMUSG00000033965	Slc16a2
ENSMUSG00000095681		ENSMUSG00000004626		ENSMUSG00000029816		ENSMUSG00000035860	Cdhr3
ENSMUSG00000074505		ENSMUSG00000034684		ENSMUSG00000031494		ENSMUSG00000055134	9130017K11Rik
ENSMUSG00000037872		ENSMUSG00000049164		ENSMUSG00000034612		ENSMUSG00000091636	Akain1
ENSMUSG00000046480		ENSMUSG00000031995		ENSMUSG00000042460		ENSMUSG00000002265	Peg3
ENSMUSG00000089914		ENSMUSG00000042529		ENSMUSG00000050910		ENSMUSG00000045180	Shroom2
ENSMUSG00000103088		ENSMUSG00000022494		ENSMUSG00000060981		ENSMUSG00000047759	Hs3st3a1
ENSMUSG00000020914		ENSMUSG00000039372		ENSMUSG00000085773		ENSMUSG00000022724	Riox2
ENSMUSG00000022894		ENSMUSG00000029602		ENSMUSG00000098029		ENSMUSG00000085125	Gm16070
ENSMUSG00000089679		ENSMUSG00000010021		ENSMUSG00000104713		ENSMUSG00000032172	Olfm2
ENSMUSG00000070327		ENSMUSG00000028753		ENSMUSG00000028243		ENSMUSG00000027253	Lrp4
ENSMUSG00000029994		ENSMUSG00000057182		ENSMUSG00000038507		ENSMUSG00000020080	Hkdc1
ENSMUSG00000034460		ENSMUSG00000038732		ENSMUSG00000040666		ENSMUSG00000022636	Alcam
ENSMUSG00000036904		ENSMUSG00000020681		ENSMUSG00000070867		ENSMUSG00000024593	Megf10
ENSMUSG00000041046		ENSMUSG00000047139		ENSMUSG00000078122		ENSMUSG00000052848	C130026L21Rik
ENSMUSG00000033965		ENSMUSG00000103585		ENSMUSG00000114680		ENSMUSG00000042529	Kcnj12
ENSMUSG00000035860		ENSMUSG00000070348		ENSMUSG00000025370		ENSMUSG00000027750	Postn
ENSMUSG00000055134		ENSMUSG00000098029		ENSMUSG00000027358		ENSMUSG00000055027	Smyd1
ENSMUSG00000091636		ENSMUSG00000117767		ENSMUSG00000029838		ENSMUSG00000109792	Gm45426
ENSMUSG00000059742		ENSMUSG00000042498		ENSMUSG00000055639		ENSMUSG00000005973	Rcn1
ENSMUSG00000002265		ENSMUSG00000113121		ENSMUSG00000083744		ENSMUSG00000062151	Unc13c
ENSMUSG00000045180		ENSMUSG00000002997		ENSMUSG00000115509		ENSMUSG00000091243	Vgll3
ENSMUSG00000047759		ENSMUSG00000054509		ENSMUSG00000035967		ENSMUSG00000039372	Marchf4
ENSMUSG00000022724		ENSMUSG00000035258		ENSMUSG00000047446		ENSMUSG00000045838	Ccdc9b
ENSMUSG00000085125		ENSMUSG00000026676		ENSMUSG00000051111		ENSMUSG00000072591	Fzd10os
ENSMUSG00000032172		ENSMUSG00000060675		ENSMUSG00000062151		ENSMUSG00000118202	C030017B01Rik
ENSMUSG00000027253		ENSMUSG00000030236		ENSMUSG00000063446		ENSMUSG00000090486	BC035947
ENSMUSG00000020080		ENSMUSG00000075316		ENSMUSG00000090486		ENSMUSG00000038732	Mboat1
ENSMUSG00000022636		ENSMUSG00000097754		ENSMUSG00000097178		ENSMUSG00000045657	Pcdhb10
ENSMUSG00000024593		ENSMUSG00000070867		ENSMUSG00000047712		ENSMUSG00000026676	Ccdc3
ENSMUSG00000044719		ENSMUSG00000000531		ENSMUSG00000050822		ENSMUSG00000063383	Zfp947
ENSMUSG00000052848		ENSMUSG00000044912		ENSMUSG00000015134		ENSMUSG00000015354	Pcolce2
ENSMUSG00000042529		ENSMUSG00000037872		ENSMUSG00000020599		ENSMUSG00000020263	Appl2
ENSMUSG00000027750		ENSMUSG00000034209		ENSMUSG00000030605		ENSMUSG00000038517	Tbkbp1
ENSMUSG00000055027		ENSMUSG00000049493		ENSMUSG00000031730		ENSMUSG00000052572	Dlg2
ENSMUSG00000109792		ENSMUSG00000098128		ENSMUSG00000032193		ENSMUSG00000079465	Col4a3
ENSMUSG00000098741		ENSMUSG00000002147		ENSMUSG00000037465		ENSMUSG00000024924	Vldlr
ENSMUSG00000005973		ENSMUSG00000041046		ENSMUSG00000054871		ENSMUSG00000049493	Pls1
ENSMUSG00000062151		ENSMUSG00000049928		ENSMUSG00000062760		ENSMUSG00000028601	Echdc2
ENSMUSG00000091243		ENSMUSG00000035967		ENSMUSG00000026471		ENSMUSG00000062939	Stat4
ENSMUSG00000039372		ENSMUSG00000030994		ENSMUSG00000033295		ENSMUSG00000033342	Plppr5
ENSMUSG00000045838		ENSMUSG00000055972		ENSMUSG00000104420		ENSMUSG00000060780	Lrrtm1
ENSMUSG00000072591		ENSMUSG00000020758		ENSMUSG00000107696		ENSMUSG00000010021	Kif19a
ENSMUSG00000118202		ENSMUSG00000048644		ENSMUSG00000026841		ENSMUSG00000026471	Mr1
ENSMUSG00000090486		ENSMUSG00000033965		ENSMUSG00000028194		ENSMUSG00000104063	Pcdhgb7
ENSMUSG00000038732		ENSMUSG00000060780		ENSMUSG00000032172		ENSMUSG00000073514	Dok6
ENSMUSG00000045657		ENSMUSG00000085125		ENSMUSG00000039735		ENSMUSG00000049928	Glp2r
ENSMUSG00000026676		ENSMUSG00000078137		ENSMUSG00000072875		ENSMUSG00000019194	Scn1b
ENSMUSG00000063383		ENSMUSG00000044122		ENSMUSG00000081683		ENSMUSG00000085235	Gm12576
ENSMUSG00000015354		ENSMUSG00000059361		ENSMUSG00000104708		ENSMUSG00000020723	Cacng4
ENSMUSG00000020263		ENSMUSG00000041309		ENSMUSG00000028601		ENSMUSG00000053626	Tll1
ENSMUSG00000038517		ENSMUSG00000066189		ENSMUSG00000030729		ENSMUSG00000041309	Nkx6-2
ENSMUSG00000052572		ENSMUSG00000036218		ENSMUSG00000044548		ENSMUSG00000066189	Cacng3
ENSMUSG00000079465		ENSMUSG00000014592		ENSMUSG00000027318		ENSMUSG00000021200	Asb2
ENSMUSG00000024924		ENSMUSG00000109770		ENSMUSG00000034009		ENSMUSG00000022187	Gm5546
ENSMUSG00000049493		ENSMUSG00000028541		ENSMUSG00000063458		ENSMUSG00000117864	Gm19500
ENSMUSG00000028601		ENSMUSG00000025789		ENSMUSG00000028906		ENSMUSG00000033196	Myh2
ENSMUSG00000062939		ENSMUSG00000024887		ENSMUSG00000031778		ENSMUSG00000041261	Car8
ENSMUSG00000033342		ENSMUSG00000058624		ENSMUSG00000090071		ENSMUSG00000025584	Pde8a
ENSMUSG00000060780		ENSMUSG00000042567		ENSMUSG00000112540		ENSMUSG00000042524	Sun2
ENSMUSG00000010021		ENSMUSG00000021613		ENSMUSG00000114590		ENSMUSG00000053024	Cntn2
ENSMUSG00000026471		ENSMUSG00000034755		ENSMUSG00000002265		ENSMUSG00000079055	Slc8a3
ENSMUSG00000104063		ENSMUSG00000062151		ENSMUSG00000021709		ENSMUSG00000044847	Lsm11
ENSMUSG00000073514		ENSMUSG00000030729		ENSMUSG00000031673		ENSMUSG00000049281	Scn3b
ENSMUSG00000049928		ENSMUSG00000060534		ENSMUSG00000033880		ENSMUSG00000025789	St8sia2
ENSMUSG00000019194		ENSMUSG00000028957		ENSMUSG00000055972		ENSMUSG00000015846	Rxra
ENSMUSG00000085235		ENSMUSG00000047759		ENSMUSG00000036402		ENSMUSG00000104868	Gm9954
ENSMUSG00000020723		ENSMUSG00000047907		ENSMUSG00000050069		ENSMUSG00000018593	Sparc
ENSMUSG00000053626		ENSMUSG00000103081		ENSMUSG00000082351		ENSMUSG00000092274	Neat1
ENSMUSG00000041309		ENSMUSG00000043822		ENSMUSG00000089679		ENSMUSG00000113121	Gm35161
ENSMUSG00000066189		ENSMUSG00000026471		ENSMUSG00000102753		ENSMUSG00000026614	Slc30a10
ENSMUSG00000021200		ENSMUSG00000091636		ENSMUSG00000003948		ENSMUSG00000028860	Sytl1
ENSMUSG00000022187		ENSMUSG00000053799		ENSMUSG00000031654		ENSMUSG00000038370	Pcp4l1
ENSMUSG00000117864		ENSMUSG00000090071		ENSMUSG00000033420		ENSMUSG00000059213	Ddn
ENSMUSG00000033196		ENSMUSG00000002032		ENSMUSG00000053783		ENSMUSG00000055639	Dach1
ENSMUSG00000041261		ENSMUSG00000100837		ENSMUSG00000098659		ENSMUSG00000116081	Gm49593
ENSMUSG00000025584		ENSMUSG00000062939		ENSMUSG00000019874		ENSMUSG00000033590	Myo5c
ENSMUSG00000042524		ENSMUSG00000015846		ENSMUSG00000020411		ENSMUSG00000060675	Plaat3
ENSMUSG00000053024		ENSMUSG00000040183		ENSMUSG00000039114		ENSMUSG00000113920	Gm18783
ENSMUSG00000079055		ENSMUSG00000044469		ENSMUSG00000050896		ENSMUSG00000070687	Htr1d
ENSMUSG00000044847		ENSMUSG00000038257		ENSMUSG00000025366		ENSMUSG00000034098	Fstl5
ENSMUSG00000049281		ENSMUSG00000025584		ENSMUSG00000028019		ENSMUSG00000040428	Plekha4
ENSMUSG00000025789		ENSMUSG00000031563		ENSMUSG00000029605		ENSMUSG00000032356	Rasgrf1
ENSMUSG00000015846		ENSMUSG00000022894		ENSMUSG00000029878		ENSMUSG00000053963	Stum
ENSMUSG00000104868		ENSMUSG00000026605		ENSMUSG00000066189		ENSMUSG00000027359	Slc27a2
ENSMUSG00000018593		ENSMUSG00000036863		ENSMUSG00000070601		ENSMUSG00000045087	S1pr5
ENSMUSG00000092274		ENSMUSG00000039904		ENSMUSG00000033377		ENSMUSG00000071176	Arhgef10
ENSMUSG00000113121		ENSMUSG00000025738		ENSMUSG00000044912		ENSMUSG00000049583	Grm5
ENSMUSG00000058997		ENSMUSG00000071379		ENSMUSG00000059187		ENSMUSG00000029120	Ppp2r2c
ENSMUSG00000079190		ENSMUSG00000021200		ENSMUSG00000060534		ENSMUSG00000066760	Psg16
ENSMUSG00000026614		ENSMUSG00000105265		ENSMUSG00000110249		ENSMUSG00000075296	Aldh3b2
ENSMUSG00000028860		ENSMUSG00000026833		ENSMUSG00000118012		ENSMUSG00000026463	Atp2b4
ENSMUSG00000038370		ENSMUSG00000090626		ENSMUSG00000052912		ENSMUSG00000022494	Shisa9
ENSMUSG00000059213		ENSMUSG00000021259		ENSMUSG00000067818		ENSMUSG00000028019	Pdgfc
ENSMUSG00000055639		ENSMUSG00000083744		ENSMUSG00000090675		ENSMUSG00000102222	Pcdhga10
ENSMUSG00000116081		ENSMUSG00000051703		ENSMUSG00000020387		ENSMUSG00000006301	Tmbim1
ENSMUSG00000027547		ENSMUSG00000116081		ENSMUSG00000025372		ENSMUSG00000098029	Gm7745
ENSMUSG00000068129		ENSMUSG00000027210		ENSMUSG00000026827		ENSMUSG00000029605	Oas1b
ENSMUSG00000033590		ENSMUSG00000040125		ENSMUSG00000040675		ENSMUSG00000103585	Pcdhgb4
ENSMUSG00000060675		ENSMUSG00000037469		ENSMUSG00000054488		ENSMUSG00000024887	Asah2
ENSMUSG00000113920		ENSMUSG00000034997		ENSMUSG00000027896		ENSMUSG00000067889	Sptbn2
ENSMUSG00000070687		ENSMUSG00000036904		ENSMUSG00000040364		ENSMUSG00000032714	Syde1
ENSMUSG00000034098		ENSMUSG00000104868		ENSMUSG00000020098		ENSMUSG00000035653	Lrfn5
ENSMUSG00000040428		ENSMUSG00000028813		ENSMUSG00000000184		ENSMUSG00000020696	Rffl
ENSMUSG00000032356		ENSMUSG00000050910		ENSMUSG00000005360		ENSMUSG00000000531	Tamalin
ENSMUSG00000053963		ENSMUSG00000005360		ENSMUSG00000017144		ENSMUSG00000018470	Kcnab3
ENSMUSG00000027359		ENSMUSG00000000794		ENSMUSG00000021223		ENSMUSG00000026748	Plxdc2
ENSMUSG00000045087		ENSMUSG00000051726		ENSMUSG00000038607		ENSMUSG00000044447	Dock5
ENSMUSG00000071176		ENSMUSG00000035397		ENSMUSG00000063260		ENSMUSG00000112540	Gm47461
ENSMUSG00000049583		ENSMUSG00000118154		ENSMUSG00000000794		ENSMUSG00000029602	Rasal1
ENSMUSG00000029120		ENSMUSG00000026827		ENSMUSG00000053411		ENSMUSG00000112276	5033421B08Rik
ENSMUSG00000066760		ENSMUSG00000041261		ENSMUSG00000090291		ENSMUSG00000090071	Cdk5r2
ENSMUSG00000075296		ENSMUSG00000052572		ENSMUSG00000021180		ENSMUSG00000090626	Tex9
ENSMUSG00000072944		ENSMUSG00000068735		ENSMUSG00000053289		ENSMUSG00000005087	Cd44
ENSMUSG00000026463		ENSMUSG00000047419		ENSMUSG00000069268		ENSMUSG00000034209	Rasl10a
ENSMUSG00000022494		ENSMUSG00000025592		ENSMUSG00000002997		ENSMUSG00000091476	Catspere2
ENSMUSG00000028019		ENSMUSG00000050944		ENSMUSG00000033350		ENSMUSG00000033022	Cdo1
ENSMUSG00000102222		ENSMUSG00000052565		ENSMUSG00000046182		ENSMUSG00000049112	Oxtr
ENSMUSG00000006301		ENSMUSG00000021733		ENSMUSG00000046523		ENSMUSG00000000753	Serpinf1
ENSMUSG00000098029		ENSMUSG00000052707		ENSMUSG00000069132		ENSMUSG00000001506	Col1a1
ENSMUSG00000029605		ENSMUSG00000074896		ENSMUSG00000022342		ENSMUSG00000026655	Fam107b
ENSMUSG00000103585		ENSMUSG00000029581		ENSMUSG00000040170		ENSMUSG00000028931	Kcnab2
ENSMUSG00000024887		ENSMUSG00000087266		ENSMUSG00000050953		ENSMUSG00000040125	Gpr26
ENSMUSG00000067889		ENSMUSG00000029307		ENSMUSG00000060675		ENSMUSG00000033249	Hsf4
ENSMUSG00000032714		ENSMUSG00000075415		ENSMUSG00000015846		ENSMUSG00000022150	Dab2
ENSMUSG00000035653		ENSMUSG00000040428		ENSMUSG00000023341		ENSMUSG00000044788	Fads6
ENSMUSG00000020696		ENSMUSG00000053783		ENSMUSG00000025776		ENSMUSG00000072875	Gpr27
ENSMUSG00000000531		ENSMUSG00000097596		ENSMUSG00000026614		ENSMUSG00000042460	C1galt1
ENSMUSG00000018470		ENSMUSG00000055067		ENSMUSG00000048834		ENSMUSG00000075316	Scn9a
ENSMUSG00000026748		ENSMUSG00000022715		ENSMUSG00000026389		ENSMUSG00000028294	Cfap206
ENSMUSG00000044447		ENSMUSG00000020889		ENSMUSG00000031837		ENSMUSG00000103081	Pcdhgb8
ENSMUSG00000112540		ENSMUSG00000013523		ENSMUSG00000033717		ENSMUSG00000031241	Tbx22
ENSMUSG00000029602		ENSMUSG00000071753		ENSMUSG00000034265		ENSMUSG00000064372	mt-Tp
ENSMUSG00000034401		ENSMUSG00000033006		ENSMUSG00000065701		ENSMUSG00000109121	Gm44644
ENSMUSG00000112276		ENSMUSG00000025213		ENSMUSG00000097336		ENSMUSG00000024411	Aqp4
ENSMUSG00000090071		ENSMUSG00000047712		ENSMUSG00000022494		ENSMUSG00000029471	Camkk2
ENSMUSG00000090626		ENSMUSG00000012443		ENSMUSG00000034459		ENSMUSG00000043635	Adamts3
ENSMUSG00000005087		ENSMUSG00000045027		ENSMUSG00000039109		ENSMUSG00000057716	Tmem178b
ENSMUSG00000034209		ENSMUSG00000031385		ENSMUSG00000040164		ENSMUSG00000044122	Proca1
ENSMUSG00000091476		ENSMUSG00000030134		ENSMUSG00000097929		ENSMUSG00000050600	Zfp831
ENSMUSG00000054889		ENSMUSG00000021180		ENSMUSG00000019789		ENSMUSG00000054934	Kcnmb4
ENSMUSG00000033022		ENSMUSG00000027669		ENSMUSG00000070880		ENSMUSG00000039323	Igfbp2
ENSMUSG00000049112		ENSMUSG00000029994		ENSMUSG00000090671		ENSMUSG00000041741	Pde3a
ENSMUSG00000000753		ENSMUSG00000050600		ENSMUSG00000113784		ENSMUSG00000034755	Pcdh11x
ENSMUSG00000001506		ENSMUSG00000095334		ENSMUSG00000031137		ENSMUSG00000042567	Nek10
ENSMUSG00000026655		ENSMUSG00000052336		ENSMUSG00000031613		ENSMUSG00000021613	Hapln1
ENSMUSG00000028931		ENSMUSG00000079055		ENSMUSG00000047419		ENSMUSG00000045994	B3gat1
ENSMUSG00000040125		ENSMUSG00000044042		ENSMUSG00000022893		ENSMUSG00000020027	Socs2
ENSMUSG00000033249		ENSMUSG00000040339		ENSMUSG00000002032		ENSMUSG00000059361	Nrsn2
ENSMUSG00000022150		ENSMUSG00000022150		ENSMUSG00000036466		ENSMUSG00000029661	Col1a2
ENSMUSG00000044788		ENSMUSG00000018819		ENSMUSG00000105003		ENSMUSG00000004626	Stxbp2
ENSMUSG00000072875		ENSMUSG00000048015		ENSMUSG00000019960		ENSMUSG00000078137	Ankrd63
ENSMUSG00000042460		ENSMUSG00000045657		ENSMUSG00000036699		ENSMUSG00000012443	Kif11
ENSMUSG00000075316		ENSMUSG00000031837		ENSMUSG00000004626		ENSMUSG00000056820	Tsnax
ENSMUSG00000028294		ENSMUSG00000069911		ENSMUSG00000016256		ENSMUSG00000074896	Ifit3
ENSMUSG00000103081		ENSMUSG00000042460		ENSMUSG00000021200		ENSMUSG00000083744	Gm14824
ENSMUSG00000031241		ENSMUSG00000020589		ENSMUSG00000030543		ENSMUSG00000114479	Gm49375
ENSMUSG00000064372		ENSMUSG00000015354		ENSMUSG00000038550		ENSMUSG00000040009	Gnaz
ENSMUSG00000109121		ENSMUSG00000016256		ENSMUSG00000015852		ENSMUSG00000031441	Atp11a
ENSMUSG00000106799		ENSMUSG00000031494		ENSMUSG00000044471		ENSMUSG00000053799	Exoc6
ENSMUSG00000024411		ENSMUSG00000034919		ENSMUSG00000044788		ENSMUSG00000097877	Gm26703
ENSMUSG00000029471		ENSMUSG00000054920		ENSMUSG00000046879		ENSMUSG00000018819	Lsp1
ENSMUSG00000043635		ENSMUSG00000027318		ENSMUSG00000115238		ENSMUSG00000100837	1700063D05Rik
ENSMUSG00000057716		ENSMUSG00000047996		ENSMUSG00000036894		ENSMUSG00000052336	Cx3cr1
ENSMUSG00000044122		ENSMUSG00000032036		ENSMUSG00000071847		ENSMUSG00000035397	Klf16
ENSMUSG00000050600		ENSMUSG00000027296		ENSMUSG00000029602		ENSMUSG00000030577	Cd22
ENSMUSG00000054934		ENSMUSG00000052155		ENSMUSG00000034317		ENSMUSG00000039470	Zdhhc2
ENSMUSG00000039323		ENSMUSG00000078122		ENSMUSG00000038879		ENSMUSG00000025213	Kazald1
ENSMUSG00000027748		ENSMUSG00000036469		ENSMUSG00000022421		ENSMUSG00000028259	Fhl5
ENSMUSG00000041741		ENSMUSG00000035429		ENSMUSG00000027296		ENSMUSG00000055067	Smyd3
ENSMUSG00000034755		ENSMUSG00000020836		ENSMUSG00000031216		ENSMUSG00000032705	Exd2
ENSMUSG00000042567		ENSMUSG00000063458		ENSMUSG00000038618		ENSMUSG00000034282	Evpl
ENSMUSG00000021613		ENSMUSG00000051111		ENSMUSG00000083534		ENSMUSG00000051703	Tmem198
ENSMUSG00000045994		ENSMUSG00000033022		ENSMUSG00000070564		ENSMUSG00000039087	Rreb1
ENSMUSG00000113074		ENSMUSG00000033342		ENSMUSG00000021130		ENSMUSG00000118012	Gm46620
ENSMUSG00000020027		ENSMUSG00000097877		ENSMUSG00000022176		ENSMUSG00000044042	Fmn1
ENSMUSG00000029090		ENSMUSG00000041431		ENSMUSG00000015879		ENSMUSG00000027210	Meis2
ENSMUSG00000059361		ENSMUSG00000097083		ENSMUSG00000030847		ENSMUSG00000036915	Kirrel2
ENSMUSG00000037148		ENSMUSG00000060716		ENSMUSG00000074968		ENSMUSG00000060534	Dcc
ENSMUSG00000029661		ENSMUSG00000074748		ENSMUSG00000024790		ENSMUSG00000038257	Glra3
ENSMUSG00000004626		ENSMUSG00000024924		ENSMUSG00000046818		ENSMUSG00000016256	Ctsz
ENSMUSG00000078137		ENSMUSG00000075031		ENSMUSG00000055761		ENSMUSG00000117093	Gm49949
ENSMUSG00000012443		ENSMUSG00000026655		ENSMUSG00000033342		ENSMUSG00000044770	Scml4
ENSMUSG00000056820		ENSMUSG00000090675		ENSMUSG00000029392		ENSMUSG00000022091	Sorbs3
ENSMUSG00000074896		ENSMUSG00000036915		ENSMUSG00000032532		ENSMUSG00000026630	Batf3
ENSMUSG00000083744		ENSMUSG00000036882		ENSMUSG00000047021		ENSMUSG00000020061	Mybpc1
ENSMUSG00000114479		ENSMUSG00000111110		ENSMUSG00000004952		ENSMUSG00000002944	Cd36
ENSMUSG00000040009		ENSMUSG00000031605		ENSMUSG00000021721		ENSMUSG00000010175	Prox1
ENSMUSG00000031441		ENSMUSG00000111360		ENSMUSG00000044787		ENSMUSG00000040037	Negr1
ENSMUSG00000053799		ENSMUSG00000091455		ENSMUSG00000060802		ENSMUSG00000035891	Cerk
ENSMUSG00000097877		ENSMUSG00000033420		ENSMUSG00000007617		ENSMUSG00000042035	Igsf3
ENSMUSG00000018819		ENSMUSG00000119584		ENSMUSG00000023800		ENSMUSG00000044548	Dact1
ENSMUSG00000100837		ENSMUSG00000029838		ENSMUSG00000024990		ENSMUSG00000047996	Prrg1
ENSMUSG00000052336		ENSMUSG00000091476		ENSMUSG00000028813		ENSMUSG00000020593	Lpin1
ENSMUSG00000035397		ENSMUSG00000024593		ENSMUSG00000117093		ENSMUSG00000028813	CK137956
ENSMUSG00000079808		ENSMUSG00000035274		ENSMUSG00000025592		ENSMUSG00000085282	Gm15663
ENSMUSG00000030577		ENSMUSG00000049583		ENSMUSG00000041710		ENSMUSG00000029307	Dmp1
ENSMUSG00000039470		ENSMUSG00000022724		ENSMUSG00000060093		ENSMUSG00000111360	Gm38642
ENSMUSG00000025213		ENSMUSG00000092021		ENSMUSG00000010175		ENSMUSG00000024937	Ehbp1l1
ENSMUSG00000019843		ENSMUSG00000003934		ENSMUSG00000021280		ENSMUSG00000105966	Gm43242
ENSMUSG00000028259		ENSMUSG00000039470		ENSMUSG00000033249		ENSMUSG00000055972	2810407A14Rik
ENSMUSG00000055067		ENSMUSG00000064308		ENSMUSG00000027796		ENSMUSG00000040563	Plppr2
ENSMUSG00000032705		ENSMUSG00000046447		ENSMUSG00000044949		ENSMUSG00000053783	1700016K19Rik
ENSMUSG00000034282		ENSMUSG00000020486		ENSMUSG00000018102		ENSMUSG00000071379	Hpcal1
ENSMUSG00000051703		ENSMUSG00000020905		ENSMUSG00000035545		ENSMUSG00000031613	Hpgd
ENSMUSG00000039087		ENSMUSG00000032705		ENSMUSG00000041362		ENSMUSG00000048281	Dleu7
ENSMUSG00000023828		ENSMUSG00000034235		ENSMUSG00000001227		ENSMUSG00000070348	Ccnd1
ENSMUSG00000118012		ENSMUSG00000105152		ENSMUSG00000022763		ENSMUSG00000030236	Slco1b2
ENSMUSG00000044042		ENSMUSG00000034282		ENSMUSG00000105422		ENSMUSG00000030729	Pgm2l1
ENSMUSG00000027210		ENSMUSG00000022454		ENSMUSG00000053093		ENSMUSG00000105152	Gm42864
ENSMUSG00000036915		ENSMUSG00000112597		ENSMUSG00000074892		ENSMUSG00000118154	9330117O12Rik
ENSMUSG00000060534		ENSMUSG00000000753		ENSMUSG00000045991		ENSMUSG00000109770	Gm30085
ENSMUSG00000038257		ENSMUSG00000020061		ENSMUSG00000076441		ENSMUSG00000117767	Gm18786
ENSMUSG00000073591		ENSMUSG00000105422		ENSMUSG00000022661		ENSMUSG00000105265	Sox2ot
ENSMUSG00000016256		ENSMUSG00000057132		ENSMUSG00000032338		ENSMUSG00000029084	Cd38
ENSMUSG00000117093		ENSMUSG00000045838		ENSMUSG00000035285		ENSMUSG00000047907	Tshz2
ENSMUSG00000044770		ENSMUSG00000116480		ENSMUSG00000046192		ENSMUSG00000015112	Slc25a13
ENSMUSG00000020181		ENSMUSG00000020696		ENSMUSG00000011148		ENSMUSG00000027820	Mme
ENSMUSG00000022091		ENSMUSG00000005397		ENSMUSG00000026399		ENSMUSG00000052565	H1f3
ENSMUSG00000026630		ENSMUSG00000058881		ENSMUSG00000040297		ENSMUSG00000074748	Atxn7l3b
ENSMUSG00000020061		ENSMUSG00000072875		ENSMUSG00000040852		ENSMUSG00000042498	Radx
ENSMUSG00000002944		ENSMUSG00000118280		ENSMUSG00000048001		ENSMUSG00000040339	Fam102b
ENSMUSG00000010175		ENSMUSG00000105703		ENSMUSG00000037169		ENSMUSG00000068735	Trp53i11
ENSMUSG00000024413		ENSMUSG00000102222		ENSMUSG00000046447		ENSMUSG00000034164	Emid1
ENSMUSG00000040037		ENSMUSG00000020263		ENSMUSG00000050926		ENSMUSG00000097596	Gm26673
ENSMUSG00000035891		ENSMUSG00000039114		ENSMUSG00000036578		ENSMUSG00000048440	Cyp4f16
ENSMUSG00000042035		ENSMUSG00000035202		ENSMUSG00000036264		ENSMUSG00000078853	Igtp
ENSMUSG00000044548		ENSMUSG00000028294		ENSMUSG00000000031		ENSMUSG00000044949	Ubtd2
ENSMUSG00000047996		ENSMUSG00000104901		ENSMUSG00000031987		ENSMUSG00000033350	Chst2
ENSMUSG00000020593		ENSMUSG00000030739		ENSMUSG00000092746		ENSMUSG00000027296	Itpka
ENSMUSG00000028813		ENSMUSG00000078853		ENSMUSG00000099583		ENSMUSG00000020889	Nr1d1
ENSMUSG00000031012		ENSMUSG00000004952		ENSMUSG00000031246		ENSMUSG00000028957	Per3
ENSMUSG00000085282		ENSMUSG00000026614		ENSMUSG00000049630		ENSMUSG00000048644	Ctxn1
ENSMUSG00000029307		ENSMUSG00000104597		ENSMUSG00000046449		ENSMUSG00000004952	Rasa4
ENSMUSG00000049106		ENSMUSG00000057554		ENSMUSG00000053199		ENSMUSG00000033006	Sox10
ENSMUSG00000111360		ENSMUSG00000032356		ENSMUSG00000040563		ENSMUSG00000027796	Smad9
ENSMUSG00000024937		ENSMUSG00000114442		ENSMUSG00000038521		ENSMUSG00000036469	Marchf1
ENSMUSG00000105966		ENSMUSG00000055540		ENSMUSG00000056174		ENSMUSG00000051615	Rap2a
ENSMUSG00000055972		ENSMUSG00000044788		ENSMUSG00000074748		ENSMUSG00000038534	Osbpl7
ENSMUSG00000040563		ENSMUSG00000015843		ENSMUSG00000078853		ENSMUSG00000026179	Pnkd
ENSMUSG00000053783		ENSMUSG00000045087		ENSMUSG00000024593		ENSMUSG00000071847	Apcdd1
ENSMUSG00000071379		ENSMUSG00000067889		ENSMUSG00000091243		ENSMUSG00000021180	Rps6ka5
ENSMUSG00000031613		ENSMUSG00000031673		ENSMUSG00000021061		ENSMUSG00000005360	Slc1a3
ENSMUSG00000048281		ENSMUSG00000055639		ENSMUSG00000031274		ENSMUSG00000058624	Gda
ENSMUSG00000099375		ENSMUSG00000059854		ENSMUSG00000059325		ENSMUSG00000033676	Gabrb3
ENSMUSG00000070348		ENSMUSG00000029471		ENSMUSG00000024924		ENSMUSG00000034612	Chst11
ENSMUSG00000030236		ENSMUSG00000066760		ENSMUSG00000029084		ENSMUSG00000048015	Neurod4
ENSMUSG00000030729		ENSMUSG00000004031		ENSMUSG00000050505		ENSMUSG00000031385	Plxnb3
ENSMUSG00000105152		ENSMUSG00000086655		ENSMUSG00000063021		ENSMUSG00000036036	Zfp57
ENSMUSG00000113725		ENSMUSG00000057123		ENSMUSG00000018849		ENSMUSG00000026605	Cenpf
ENSMUSG00000051136		ENSMUSG00000053626		ENSMUSG00000040289		ENSMUSG00000026827	Gpd2
ENSMUSG00000118154		ENSMUSG00000039452		ENSMUSG00000053004		ENSMUSG00000027358	Bmp2
ENSMUSG00000030789		ENSMUSG00000045733		ENSMUSG00000050234		ENSMUSG00000034413	Neurl1b
ENSMUSG00000109770		ENSMUSG00000034612		ENSMUSG00000054855		ENSMUSG00000036206	Sh3bp4
ENSMUSG00000117767		ENSMUSG00000091243		ENSMUSG00000025969		ENSMUSG00000031995	St14
ENSMUSG00000105265		ENSMUSG00000024810		ENSMUSG00000005716		ENSMUSG00000051726	Kcnf1
ENSMUSG00000029084		ENSMUSG00000079084		ENSMUSG00000007656		ENSMUSG00000004383	Large1
ENSMUSG00000047907		ENSMUSG00000052848		ENSMUSG00000030790		ENSMUSG00000030739	Myh14
ENSMUSG00000015112		ENSMUSG00000021047		ENSMUSG00000031167		ENSMUSG00000005397	Nid1
ENSMUSG00000027820		ENSMUSG00000025425		ENSMUSG00000034771		ENSMUSG00000029878	Dbpht2
ENSMUSG00000052565		ENSMUSG00000040852		ENSMUSG00000046687		ENSMUSG00000025592	Dach2
ENSMUSG00000074748		ENSMUSG00000119873		ENSMUSG00000051497		ENSMUSG00000041624	Gucy1a2
ENSMUSG00000042498		ENSMUSG00000027173		ENSMUSG00000057596		ENSMUSG00000069911	Insyn2b
ENSMUSG00000040339		ENSMUSG00000042035		ENSMUSG00000025504		ENSMUSG00000021720	Rnf180
ENSMUSG00000068735		ENSMUSG00000074634		ENSMUSG00000027356		ENSMUSG00000018334	Ksr1
ENSMUSG00000036334		ENSMUSG00000042118		ENSMUSG00000086655		ENSMUSG00000095334	Gm21984
ENSMUSG00000034164		ENSMUSG00000021057		ENSMUSG00000005973		ENSMUSG00000059791	Nrm
ENSMUSG00000097596		ENSMUSG00000034714		ENSMUSG00000029561		ENSMUSG00000029098	Acox3
ENSMUSG00000024109		ENSMUSG00000031382		ENSMUSG00000030376		ENSMUSG00000033420	Antxr1
ENSMUSG00000043013		ENSMUSG00000026712		ENSMUSG00000032323		ENSMUSG00000035429	Ptprh
ENSMUSG00000048440		ENSMUSG00000021709		ENSMUSG00000034413		ENSMUSG00000039452	Snx22
ENSMUSG00000078853		ENSMUSG00000031778		ENSMUSG00000045838		ENSMUSG00000041431	Ccnb1
ENSMUSG00000044949		ENSMUSG00000007279		ENSMUSG00000105843		ENSMUSG00000021047	Nova1
ENSMUSG00000033350		ENSMUSG00000033350		ENSMUSG00000106383		ENSMUSG00000055540	Epha6
ENSMUSG00000027296		ENSMUSG00000109073		ENSMUSG00000113440		ENSMUSG00000060402	Chst8
ENSMUSG00000020889		ENSMUSG00000107696		ENSMUSG00000078958		ENSMUSG00000039081	Zfp503
ENSMUSG00000028957		ENSMUSG00000004383		ENSMUSG00000109121		ENSMUSG00000024990	Rbp4
ENSMUSG00000048644		ENSMUSG00000019232		ENSMUSG00000020932		ENSMUSG00000087301	Gm13629
ENSMUSG00000004952		ENSMUSG00000022091		ENSMUSG00000039395		ENSMUSG00000029581	Fscn1
ENSMUSG00000033006		ENSMUSG00000039735		ENSMUSG00000071691		ENSMUSG00000032338	Hcn4
ENSMUSG00000005547		ENSMUSG00000039081		ENSMUSG00000052681		ENSMUSG00000020905	Usp43
ENSMUSG00000027796		ENSMUSG00000015143		ENSMUSG00000070576		ENSMUSG00000075031	H2bc3
ENSMUSG00000052560		ENSMUSG00000028971		ENSMUSG00000007591		ENSMUSG00000040183	Ankrd6
ENSMUSG00000060227		ENSMUSG00000019996		ENSMUSG00000026712		ENSMUSG00000031274	Col4a5
ENSMUSG00000036469		ENSMUSG00000034164		ENSMUSG00000004383		ENSMUSG00000055202	Zfp811
ENSMUSG00000051615		ENSMUSG00000031613		ENSMUSG00000075415		ENSMUSG00000102753	Gm37056
ENSMUSG00000038534		ENSMUSG00000002100		ENSMUSG00000030785		ENSMUSG00000104973	A530041M06Rik
ENSMUSG00000026179		ENSMUSG00000027864		ENSMUSG00000033965		ENSMUSG00000022715	Tmem114
ENSMUSG00000071847		ENSMUSG00000052681		ENSMUSG00000034926		ENSMUSG00000104901	Gm42692
ENSMUSG00000021180		ENSMUSG00000026179		ENSMUSG00000050777		ENSMUSG00000036641	Ccdc148
ENSMUSG00000005360		ENSMUSG00000034413		ENSMUSG00000108446		ENSMUSG00000020589	Cyria
ENSMUSG00000058624		ENSMUSG00000081683		ENSMUSG00000057337		ENSMUSG00000020886	Dlg4
ENSMUSG00000033676		ENSMUSG00000025889		ENSMUSG00000003974		ENSMUSG00000097754	Ptgs2os2
ENSMUSG00000032523		ENSMUSG00000005087		ENSMUSG00000027824		ENSMUSG00000069227	Gprin1
ENSMUSG00000034612		ENSMUSG00000029878		ENSMUSG00000073460		ENSMUSG00000026841	Fibcd1
ENSMUSG00000048015		ENSMUSG00000119656		ENSMUSG00000112169		ENSMUSG00000102232	Gm19035
ENSMUSG00000031385		ENSMUSG00000058818		ENSMUSG00000113342		ENSMUSG00000017132	Cyth1
ENSMUSG00000036036		ENSMUSG00000005973		ENSMUSG00000025314		ENSMUSG00000007207	Stx1a
ENSMUSG00000026605		ENSMUSG00000003746		ENSMUSG00000042348		ENSMUSG00000081683	Fzd10
ENSMUSG00000026827		ENSMUSG00000035653		ENSMUSG00000020427		ENSMUSG00000028943	Espn
ENSMUSG00000027358		ENSMUSG00000003948		ENSMUSG00000055172		ENSMUSG00000039542	Ncam1
ENSMUSG00000005506		ENSMUSG00000020604		ENSMUSG00000102729		ENSMUSG00000037469	Acp7
ENSMUSG00000034413		ENSMUSG00000022661		ENSMUSG00000059852		ENSMUSG00000039904	Gpr37
ENSMUSG00000036206		ENSMUSG00000028176		ENSMUSG00000048216		ENSMUSG00000006127	Inpp5k
ENSMUSG00000031995		ENSMUSG00000010175		ENSMUSG00000049112		ENSMUSG00000015843	Rxrg
ENSMUSG00000065987		ENSMUSG00000028019		ENSMUSG00000027864		ENSMUSG00000021732	Fgf10
ENSMUSG00000051726		ENSMUSG00000033594		ENSMUSG00000029661		ENSMUSG00000031382	Asb11
ENSMUSG00000005338		ENSMUSG00000035891		ENSMUSG00000037843		ENSMUSG00000052681	Rap1b
ENSMUSG00000111971		ENSMUSG00000038534		ENSMUSG00000081137		ENSMUSG00000027318	Adam33
ENSMUSG00000004383		ENSMUSG00000015112		ENSMUSG00000024873		ENSMUSG00000062542	Syt9
ENSMUSG00000030739		ENSMUSG00000033249		ENSMUSG00000027977		ENSMUSG00000022558	Mroh1
ENSMUSG00000024772		ENSMUSG00000029120		ENSMUSG00000071176		ENSMUSG00000097929	Tunar
ENSMUSG00000040022		ENSMUSG00000035916		ENSMUSG00000018166		ENSMUSG00000063446	Plppr1
ENSMUSG00000045777		ENSMUSG00000029084		ENSMUSG00000025738		ENSMUSG00000007613	Tgfbr1
ENSMUSG00000005397		ENSMUSG00000044770		ENSMUSG00000037868		ENSMUSG00000035274	Tpbg
ENSMUSG00000029878		ENSMUSG00000020886		ENSMUSG00000047394		ENSMUSG00000063458	Lrmda
ENSMUSG00000025592		ENSMUSG00000065499		ENSMUSG00000003746		ENSMUSG00000045027	Prss22
ENSMUSG00000041624		ENSMUSG00000059791		ENSMUSG00000114442		ENSMUSG00000034235	Usp54
ENSMUSG00000069911		ENSMUSG00000018334		ENSMUSG00000057606		ENSMUSG00000114442	F630042J09Rik
ENSMUSG00000021720		ENSMUSG00000033676		ENSMUSG00000098557		ENSMUSG00000105011	Gm43210
ENSMUSG00000018334		ENSMUSG00000020027		ENSMUSG00000051965		ENSMUSG00000034997	Htr2a
ENSMUSG00000095334		ENSMUSG00000025372		ENSMUSG00000061186		ENSMUSG00000033949	Trim36
ENSMUSG00000059791		ENSMUSG00000024990		ENSMUSG00000042388		ENSMUSG00000055761	Nkain3
ENSMUSG00000104244		ENSMUSG00000112358		ENSMUSG00000058254		ENSMUSG00000105703	Gm43305
ENSMUSG00000029098		ENSMUSG00000031167		ENSMUSG00000071341		ENSMUSG00000051111	Sv2c
ENSMUSG00000033420		ENSMUSG00000108218		ENSMUSG00000030737		ENSMUSG00000029231	Pdgfra
ENSMUSG00000035429		ENSMUSG00000036036		ENSMUSG00000106010		ENSMUSG00000059854	Hydin
ENSMUSG00000039452		ENSMUSG00000071847		ENSMUSG00000026748		ENSMUSG00000021536	Adcy2
ENSMUSG00000022519		ENSMUSG00000006301		ENSMUSG00000029419		ENSMUSG00000041911	Dlx1
ENSMUSG00000041431		ENSMUSG00000032714		ENSMUSG00000088185		ENSMUSG00000015143	Actn1
ENSMUSG00000057722		ENSMUSG00000102232		ENSMUSG00000029334		ENSMUSG00000040852	Plekhh2
ENSMUSG00000021047		ENSMUSG00000051615		ENSMUSG00000096107		ENSMUSG00000029838	Ptn
ENSMUSG00000055540		ENSMUSG00000116604		ENSMUSG00000105044		ENSMUSG00000046447	Camk2n1
ENSMUSG00000060402		ENSMUSG00000086003		ENSMUSG00000050930		ENSMUSG00000111110	Gm36855
ENSMUSG00000039081		ENSMUSG00000112168		ENSMUSG00000027499		ENSMUSG00000102729	Gm32444
ENSMUSG00000024990		ENSMUSG00000074923		ENSMUSG00000106292		ENSMUSG00000026712	Mrc1
ENSMUSG00000087301		ENSMUSG00000029231		ENSMUSG00000005718		ENSMUSG00000032908	Sgpp2
ENSMUSG00000029581		ENSMUSG00000117557		ENSMUSG00000053070		ENSMUSG00000025758	Plk4
ENSMUSG00000032338		ENSMUSG00000064372		ENSMUSG00000055134		ENSMUSG00000008763	Man1a2
ENSMUSG00000020905		ENSMUSG00000047261		ENSMUSG00000100053		ENSMUSG00000078122	F630028O10Rik
ENSMUSG00000075031		ENSMUSG00000019122		ENSMUSG00000094707		ENSMUSG00000004187	Kifc2
ENSMUSG00000040950		ENSMUSG00000040009		ENSMUSG00000006587		ENSMUSG00000075415	Fnbp1
ENSMUSG00000040183		ENSMUSG00000027359		ENSMUSG00000052783		ENSMUSG00000036882	Arhgap33
ENSMUSG00000031274		ENSMUSG00000057716		ENSMUSG00000116604		ENSMUSG00000053399	Adamts18
ENSMUSG00000055202		ENSMUSG00000022558		ENSMUSG00000030513		ENSMUSG00000040717	Il17rd
ENSMUSG00000102753		ENSMUSG00000063415		ENSMUSG00000073427		ENSMUSG00000091455	Otogl
ENSMUSG00000104973		ENSMUSG00000029098		ENSMUSG00000090698		ENSMUSG00000086003	B230206L02Rik
ENSMUSG00000029802		ENSMUSG00000067158		ENSMUSG00000028278		ENSMUSG00000065499	Mir384
ENSMUSG00000022715		ENSMUSG00000039323		ENSMUSG00000039323		ENSMUSG00000021057	Akap5
ENSMUSG00000104901		ENSMUSG00000040563		ENSMUSG00000040811		ENSMUSG00000064080	Fbln2
ENSMUSG00000036641		ENSMUSG00000119799		ENSMUSG00000118202		ENSMUSG00000118280	Gm41804
ENSMUSG00000020589		ENSMUSG00000035783		ENSMUSG00000025795		ENSMUSG00000003746	Man1a
ENSMUSG00000020886		ENSMUSG00000063446		ENSMUSG00000033615		ENSMUSG00000038879	Nipal2
ENSMUSG00000097754		ENSMUSG00000028931		ENSMUSG00000045287		ENSMUSG00000034919	Ttc22
ENSMUSG00000053228		ENSMUSG00000033885		ENSMUSG00000069265		ENSMUSG00000022661	Cd200
ENSMUSG00000026640		ENSMUSG00000034926		ENSMUSG00000052374		ENSMUSG00000035486	Plk5
ENSMUSG00000069227		ENSMUSG00000024076		ENSMUSG00000022231		ENSMUSG00000028971	Cort
ENSMUSG00000079070		ENSMUSG00000032517		ENSMUSG00000045083		ENSMUSG00000031937	Vstm5
ENSMUSG00000026841		ENSMUSG00000048281		ENSMUSG00000068762		ENSMUSG00000027864	Ptgfrn
ENSMUSG00000102232		ENSMUSG00000054488		ENSMUSG00000116656		ENSMUSG00000116480	Gm49512
ENSMUSG00000052920		ENSMUSG00000037833		ENSMUSG00000064941		ENSMUSG00000001943	Vsig2
ENSMUSG00000017132		ENSMUSG00000041741		ENSMUSG00000022490		ENSMUSG00000112597	Gm4777
ENSMUSG00000007207		ENSMUSG00000039542		ENSMUSG00000029994		ENSMUSG00000092021	Gbp11
ENSMUSG00000081683		ENSMUSG00000032908		ENSMUSG00000055271		ENSMUSG00000039552	Rsph4a
ENSMUSG00000039328		ENSMUSG00000004698		ENSMUSG00000004031		ENSMUSG00000020846	Rflnb
ENSMUSG00000019359		ENSMUSG00000043635		ENSMUSG00000044122		ENSMUSG00000039735	Fnbp1l
ENSMUSG00000026571		ENSMUSG00000043252		ENSMUSG00000112968		ENSMUSG00000064308	2410137M14Rik
ENSMUSG00000028943		ENSMUSG00000118202		ENSMUSG00000031355		ENSMUSG00000048001	Hes5
ENSMUSG00000027967		ENSMUSG00000018849		ENSMUSG00000105663		ENSMUSG00000053004	Hrh1
ENSMUSG00000039542		ENSMUSG00000104708		ENSMUSG00000111110		ENSMUSG00000040483	Xaf1
ENSMUSG00000026188		ENSMUSG00000055602		ENSMUSG00000118711		ENSMUSG00000027173	Depdc7
ENSMUSG00000037469		ENSMUSG00000105011		ENSMUSG00000104597		ENSMUSG00000030847	Bag3
ENSMUSG00000111069		ENSMUSG00000021091		ENSMUSG00000036923		ENSMUSG00000118866	Rn7s1
ENSMUSG00000039904		ENSMUSG00000085282		ENSMUSG00000001151		ENSMUSG00000108218	Olfr1372-ps1
ENSMUSG00000103800		ENSMUSG00000031557		ENSMUSG00000040113		ENSMUSG00000041710	Trpc5
ENSMUSG00000006127		ENSMUSG00000048834		ENSMUSG00000044783		ENSMUSG00000004698	Hdac9
ENSMUSG00000015843		ENSMUSG00000026830		ENSMUSG00000115529		ENSMUSG00000055172	C1ra
ENSMUSG00000052372		ENSMUSG00000020846		ENSMUSG00000046719		ENSMUSG00000060716	Plekhh1
ENSMUSG00000021732		ENSMUSG00000039552		ENSMUSG00000086825		ENSMUSG00000105422	Gm6089
ENSMUSG00000031382		ENSMUSG00000031441		ENSMUSG00000049225		ENSMUSG00000037143	Cfap61
ENSMUSG00000052681		ENSMUSG00000031004		ENSMUSG00000041193		ENSMUSG00000026389	Steap3
ENSMUSG00000021065		ENSMUSG00000025813		ENSMUSG00000047976		ENSMUSG00000050069	Grem2
ENSMUSG00000027318		ENSMUSG00000020593		ENSMUSG00000020027		ENSMUSG00000037833	Sh2d4b
ENSMUSG00000016487		ENSMUSG00000059991		ENSMUSG00000020577		ENSMUSG00000090675	Olfr111
ENSMUSG00000026812		ENSMUSG00000027820		ENSMUSG00000031937		ENSMUSG00000007279	Scube2
ENSMUSG00000039089		ENSMUSG00000008763		ENSMUSG00000032220		ENSMUSG00000015202	Cnksr3
ENSMUSG00000062542		ENSMUSG00000097098		ENSMUSG00000039533		ENSMUSG00000051497	Kcnj16
ENSMUSG00000022558		ENSMUSG00000040037		ENSMUSG00000043439		ENSMUSG00000022505	Emp2
ENSMUSG00000058589		ENSMUSG00000104973		ENSMUSG00000049001		ENSMUSG00000048376	F2r
ENSMUSG00000097929		ENSMUSG00000056031		ENSMUSG00000051615		ENSMUSG00000038147	Cd84
ENSMUSG00000063446		ENSMUSG00000007207		ENSMUSG00000109122		ENSMUSG00000019996	Map7
ENSMUSG00000007613		ENSMUSG00000024647		ENSMUSG00000054958		ENSMUSG00000025357	Dgka
ENSMUSG00000035274		ENSMUSG00000051498		ENSMUSG00000020589		ENSMUSG00000039114	Nrn1
ENSMUSG00000063458				ENSMUSG00000042761		ENSMUSG00000053297	AI854703
ENSMUSG00000045027				ENSMUSG00000070327		ENSMUSG00000025425	St8sia5
ENSMUSG00000022665				ENSMUSG00000018819		ENSMUSG00000052921	Arhgef15
ENSMUSG00000097801				ENSMUSG00000032269		ENSMUSG00000112358	Gm33869
ENSMUSG00000034235				ENSMUSG00000051359		ENSMUSG00000086655	C330018A13Rik
ENSMUSG00000114442				ENSMUSG00000028364		ENSMUSG00000045733	Sprn
ENSMUSG00000105011				ENSMUSG00000035441		ENSMUSG00000020836	Coro6
ENSMUSG00000034997				ENSMUSG00000020886		ENSMUSG00000034714	Ttyh2
ENSMUSG00000033949				ENSMUSG00000025170		ENSMUSG00000012609	Ttll5
ENSMUSG00000055761				ENSMUSG00000040254		ENSMUSG00000036894	Rap2b
ENSMUSG00000028710				ENSMUSG00000074676		ENSMUSG00000022176	Rem2
ENSMUSG00000105703				ENSMUSG00000041773		ENSMUSG00000003948	Mmd
ENSMUSG00000051111				ENSMUSG00000112168		ENSMUSG00000031494	Cd209a
ENSMUSG00000029231				ENSMUSG00000026519		ENSMUSG00000050640	Tmem150c
ENSMUSG00000059854				ENSMUSG00000100967		ENSMUSG00000074634	Tmem267
ENSMUSG00000021536				ENSMUSG00000033917		ENSMUSG00000041235	Chd7
ENSMUSG00000031170				ENSMUSG00000109695		ENSMUSG00000016477	E2f3
ENSMUSG00000041911				ENSMUSG00000024172		ENSMUSG00000057123	Gja5
ENSMUSG00000049265				ENSMUSG00000027956		ENSMUSG00000090291	Lrrc10b
ENSMUSG00000015143				ENSMUSG00000098132		ENSMUSG00000020604	Arsg
ENSMUSG00000040852				ENSMUSG00000054000		ENSMUSG00000031673	Cdh11
ENSMUSG00000029838				ENSMUSG00000109770		ENSMUSG00000033594	Spata2l
ENSMUSG00000046447				ENSMUSG00000030795		ENSMUSG00000044285	Ubb-ps
ENSMUSG00000085837				ENSMUSG00000103695		ENSMUSG00000043557	Mdga1
ENSMUSG00000111110				ENSMUSG00000018648		ENSMUSG00000035258	Abi3bp
ENSMUSG00000102729				ENSMUSG00000053024		ENSMUSG00000013523	Bcas1
ENSMUSG00000026712				ENSMUSG00000022996		ENSMUSG00000071753	Cdr1os
ENSMUSG00000109744				ENSMUSG00000020681		ENSMUSG00000027669	Gnb4
ENSMUSG00000032908				ENSMUSG00000027555		ENSMUSG00000119584	Rn18s-rs5
ENSMUSG00000025758				ENSMUSG00000015342		ENSMUSG00000003934	Efnb3
ENSMUSG00000001870				ENSMUSG00000024766		ENSMUSG00000020486	Septin4
ENSMUSG00000048120				ENSMUSG00000052298		ENSMUSG00000035202	Lars2
ENSMUSG00000060371				ENSMUSG00000105703		ENSMUSG00000024810	Il33
ENSMUSG00000035354				ENSMUSG00000024378		ENSMUSG00000021709	Erbin
ENSMUSG00000039849				ENSMUSG00000104586		ENSMUSG00000031778	Cx3cl1
ENSMUSG00000008763				ENSMUSG00000022091		ENSMUSG00000107696	Gm44171
ENSMUSG00000036712				ENSMUSG00000029134		ENSMUSG00000019232	Etnppl
ENSMUSG00000078122				ENSMUSG00000068015		ENSMUSG00000025889	Snca
ENSMUSG00000003420				ENSMUSG00000111994		ENSMUSG00000025372	Baiap2
ENSMUSG00000004187				ENSMUSG00000030134		ENSMUSG00000031167	Rbm3
ENSMUSG00000063873				ENSMUSG00000039903		ENSMUSG00000116604	Gm49745
ENSMUSG00000075415				ENSMUSG00000044349		ENSMUSG00000112168	Gm34776
ENSMUSG00000036882				ENSMUSG00000020723		ENSMUSG00000074923	Pak6
ENSMUSG00000053399				ENSMUSG00000015484		ENSMUSG00000047261	Gap43
ENSMUSG00000040717				ENSMUSG00000074923		ENSMUSG00000063415	Cyp26b1
ENSMUSG00000091455				ENSMUSG00000001249		ENSMUSG00000035783	Acta2
ENSMUSG00000086003				ENSMUSG00000026610		ENSMUSG00000034926	Dhcr24
ENSMUSG00000065499				ENSMUSG00000056481		ENSMUSG00000032517	Mobp
ENSMUSG00000037824				ENSMUSG00000036469		ENSMUSG00000054488	Gm9946
ENSMUSG00000021057				ENSMUSG00000028943		ENSMUSG00000043252	Tmem64
ENSMUSG00000059003				ENSMUSG00000056116		ENSMUSG00000018849	Wwc1
ENSMUSG00000064080				ENSMUSG00000015843		ENSMUSG00000104708	Gm42503
ENSMUSG00000029287				ENSMUSG00000017417		ENSMUSG00000021091	Serpina3n
ENSMUSG00000074001				ENSMUSG00000027359		ENSMUSG00000031557	Plekha2
ENSMUSG00000118280				ENSMUSG00000027840		ENSMUSG00000048834	Vstm2a
ENSMUSG00000056413				ENSMUSG00000029819		ENSMUSG00000026830	Ermn
ENSMUSG00000035948				ENSMUSG00000039252		ENSMUSG00000025813	Homer2
ENSMUSG00000097814				ENSMUSG00000054206		ENSMUSG00000059991	Nptx2
ENSMUSG00000078350				ENSMUSG00000015112		ENSMUSG00000024647	Cbln2
ENSMUSG00000003746				ENSMUSG00000036902
ENSMUSG00000038879				ENSMUSG00000117465
ENSMUSG00000034919				ENSMUSG00000034164
ENSMUSG00000109587				ENSMUSG00000060512
ENSMUSG00000022661				ENSMUSG00000036206
ENSMUSG00000035486				ENSMUSG00000020374
ENSMUSG00000028971				ENSMUSG00000051627
ENSMUSG00000105909				ENSMUSG00000004187
ENSMUSG00000061576				ENSMUSG00000002459
ENSMUSG00000031937				ENSMUSG00000015143
ENSMUSG00000035172				ENSMUSG00000031605
ENSMUSG00000111631				ENSMUSG00000031618
ENSMUSG00002076474				ENSMUSG00000039059
ENSMUSG00000027864				ENSMUSG00000046805
ENSMUSG00000080885				ENSMUSG00000052688
ENSMUSG00000116480				ENSMUSG00000020774
ENSMUSG00000001943				ENSMUSG00000032714
ENSMUSG00000112597				ENSMUSG00000036006
ENSMUSG00000092021				ENSMUSG00000028527
ENSMUSG00000039552				ENSMUSG00000032280
ENSMUSG00000060843				ENSMUSG00000033933
ENSMUSG00000020846				ENSMUSG00000048385
ENSMUSG00000039735				ENSMUSG00000055202
ENSMUSG00000102748				ENSMUSG00000112597
ENSMUSG00000024855				ENSMUSG00000111990
ENSMUSG00000032570				ENSMUSG00000025422
ENSMUSG00000053080				ENSMUSG00000068617
ENSMUSG00000051401				ENSMUSG00000086363
ENSMUSG00000048029				ENSMUSG00000028755
ENSMUSG00000023908				ENSMUSG00000031517
ENSMUSG00000064308				ENSMUSG00000032908
ENSMUSG00000036155				ENSMUSG00000041559
ENSMUSG00000048001				ENSMUSG00000048440
ENSMUSG00000053004				ENSMUSG00000063286
ENSMUSG00000040483				ENSMUSG00000116557
ENSMUSG00000027173				ENSMUSG00000044689
ENSMUSG00000030847				ENSMUSG00000026072
ENSMUSG00000118866				ENSMUSG00000026170
ENSMUSG00000021134				ENSMUSG00000029096
ENSMUSG00000108218				ENSMUSG00000029716
ENSMUSG00000041710				ENSMUSG00000051985
ENSMUSG00000072964				ENSMUSG00000084968
ENSMUSG00000045934				ENSMUSG00000025813
ENSMUSG00000038354				ENSMUSG00000087536
ENSMUSG00000004698				ENSMUSG00000033906
ENSMUSG00000106361				ENSMUSG00000037253
ENSMUSG00000055172				ENSMUSG00000114469
ENSMUSG00000060716				ENSMUSG00000038732
ENSMUSG00000023249				ENSMUSG00000041378
ENSMUSG00000105422				ENSMUSG00000026388
ENSMUSG00000037143				ENSMUSG00000041141
ENSMUSG00000026389				ENSMUSG00000048376
ENSMUSG00000050069				ENSMUSG00000053178
ENSMUSG00000085667				ENSMUSG00000111027
ENSMUSG00000020151				ENSMUSG00000032101
ENSMUSG00000089941				ENSMUSG00000036856
ENSMUSG00000037833				ENSMUSG00000101972
ENSMUSG00000090675				ENSMUSG00000026833
ENSMUSG00000068252				ENSMUSG00000026443
ENSMUSG00000007279				ENSMUSG00000060424
ENSMUSG00000072720				ENSMUSG00000035891
ENSMUSG00000015202				ENSMUSG00000033949
ENSMUSG00000030866				ENSMUSG00000028753
ENSMUSG00002075066				ENSMUSG00000046321
ENSMUSG00000051497				ENSMUSG00000027173
ENSMUSG00000022505				ENSMUSG00000109372
ENSMUSG00000048376				ENSMUSG00000022261
ENSMUSG00000051182				ENSMUSG00000040653
ENSMUSG00000087475				ENSMUSG00000049580
ENSMUSG00000023279				ENSMUSG00000044447
ENSMUSG00000038147				ENSMUSG00000048489
ENSMUSG00000019996				ENSMUSG00000028931
ENSMUSG00000029016				ENSMUSG00000049892
ENSMUSG00000025357				ENSMUSG00000086181
ENSMUSG00000039114				ENSMUSG00000021643
ENSMUSG00000053297				ENSMUSG00000002897
ENSMUSG00000101337				ENSMUSG00000056215
ENSMUSG00000025425				ENSMUSG00000029361
ENSMUSG00000052921				ENSMUSG00000016763
ENSMUSG00000112358				ENSMUSG00000017009
ENSMUSG00000086655				ENSMUSG00000026463
ENSMUSG00000045733				ENSMUSG00000062785
ENSMUSG00000020836				ENSMUSG00000042846
ENSMUSG00000054150				ENSMUSG00000062542
ENSMUSG00000034714				ENSMUSG00000039621
ENSMUSG00000035112				ENSMUSG00000020102
ENSMUSG00000040146				ENSMUSG00000021379
ENSMUSG00000012609				ENSMUSG00000025427
ENSMUSG00000036894				ENSMUSG00000064345
ENSMUSG00000022176				ENSMUSG00000070524
ENSMUSG00000031497				ENSMUSG00000025986
ENSMUSG00000054986				ENSMUSG00000100837
ENSMUSG00000108865				ENSMUSG00000048782
ENSMUSG00000114851				ENSMUSG00000073000
ENSMUSG00000003948				ENSMUSG00000070687
ENSMUSG00000100303				ENSMUSG00000110331
ENSMUSG00000031494				ENSMUSG00000022382
ENSMUSG00000050640				ENSMUSG00000037071
ENSMUSG00000074634				ENSMUSG00000070366
ENSMUSG00000041235				ENSMUSG00000040717
ENSMUSG00000052539				ENSMUSG00000052707
ENSMUSG00000016477				ENSMUSG00000034258
ENSMUSG00000057123				ENSMUSG00000090877
ENSMUSG00000053310				ENSMUSG00000060716
ENSMUSG00000026587				ENSMUSG00000061615
ENSMUSG00000056394				ENSMUSG00000044734
ENSMUSG00000014602				ENSMUSG00000045027
ENSMUSG00000037363				ENSMUSG00000022715
ENSMUSG00000090291				ENSMUSG00000001943
ENSMUSG00000020604				ENSMUSG00000014592
ENSMUSG00000031673				ENSMUSG00000026185
ENSMUSG00000038252				ENSMUSG00000026994
ENSMUSG00000038457				ENSMUSG00000028480
ENSMUSG00000033594				ENSMUSG00000049420
ENSMUSG00000030849				ENSMUSG00000051703
ENSMUSG00000063887				ENSMUSG00000069306
ENSMUSG00000061607				ENSMUSG00000091476
ENSMUSG00000078597				ENSMUSG00000028871
ENSMUSG00000069044				ENSMUSG00000043079
ENSMUSG00000100832				ENSMUSG00000113459
				ENSMUSG00000079084
				ENSMUSG00000030905
				ENSMUSG00000060260
				ENSMUSG00000049556
				ENSMUSG00000049521
				ENSMUSG00000066043
				ENSMUSG00000022454
				ENSMUSG00000024610
				ENSMUSG00000022037
				ENSMUSG00000044254
				ENSMUSG00000056966
				ENSMUSG00000030208
				ENSMUSG00000040490
				ENSMUSG00000087165
				ENSMUSG00000026701
				ENSMUSG00000029120
				ENSMUSG00000038650
				ENSMUSG00000051439
				ENSMUSG00000075334
				ENSMUSG00000022309
				ENSMUSG00000040483
				ENSMUSG00000045318
				ENSMUSG00000087035
				ENSMUSG00000103183
				ENSMUSG00000028597
				ENSMUSG00000030283
				ENSMUSG00000035653
				ENSMUSG00000055485
				ENSMUSG00000095407
				ENSMUSG00000112300
				ENSMUSG00000031762
				ENSMUSG00000020173
				ENSMUSG00000023019
				ENSMUSG00000037143
				ENSMUSG00000102665
				ENSMUSG00000038463
				ENSMUSG00000045994
				ENSMUSG00000020467
				ENSMUSG00000028655
				ENSMUSG00000044042
				ENSMUSG00000096233
				ENSMUSG00000105708
				ENSMUSG00000100009
				ENSMUSG00000007892
				ENSMUSG00000054920
				ENSMUSG00000027238
				ENSMUSG00000029086
				ENSMUSG00000074743
				ENSMUSG00000028756
				ENSMUSG00000053297
				ENSMUSG00000018500
				ENSMUSG00000052821
				ENSMUSG00000022773
				ENSMUSG00000072591
				ENSMUSG00000041235
				ENSMUSG00000048895
				ENSMUSG00000023192
				ENSMUSG00000036941
				ENSMUSG00000004698
				ENSMUSG00000022622
				ENSMUSG00000031563
				ENSMUSG00000036934
				ENSMUSG00000040711
				ENSMUSG00000063455
				ENSMUSG00000087365
				ENSMUSG00000090129
				ENSMUSG00000024811
				ENSMUSG00000078670
				ENSMUSG00000019996
				ENSMUSG00000025650
				ENSMUSG00000042035
				ENSMUSG00000048978
				ENSMUSG00000029231
				ENSMUSG00000046312
				ENSMUSG00000079055
				ENSMUSG00000036863
				ENSMUSG00000114148
				ENSMUSG00000116867
				ENSMUSG00000039539
				ENSMUSG00000029642
				ENSMUSG00000033940
				ENSMUSG00000022061
				ENSMUSG00000036103
				ENSMUSG00000031842
				ENSMUSG00000043165
				ENSMUSG00000057182
				ENSMUSG00000038147
				ENSMUSG00000022636
				ENSMUSG00000054850
				ENSMUSG00000032356
				ENSMUSG00000045328
				ENSMUSG00002075637
				ENSMUSG00000115928
				ENSMUSG00000019966
				ENSMUSG00000068167
				ENSMUSG00000050201
				ENSMUSG00000053626
				ENSMUSG00000116822
				ENSMUSG00000027355
				ENSMUSG00000048281
				ENSMUSG00000042671
				ENSMUSG00000072487
				ENSMUSG00000100783
				ENSMUSG00000026482
				ENSMUSG00000044216
				ENSMUSG00000045613
				ENSMUSG00000064943
				ENSMUSG00000074715
				ENSMUSG00000015243
				ENSMUSG00000096169
				ENSMUSG00000051435
				ENSMUSG00000003814
				ENSMUSG00000014599
				ENSMUSG00000074738
				ENSMUSG00000111235
				ENSMUSG00000021047
				ENSMUSG00000051906
				ENSMUSG00000032966
				ENSMUSG00000066438
				ENSMUSG00000105265
				ENSMUSG00000033579
				ENSMUSG00000039546
				ENSMUSG00000006304
				ENSMUSG00000028294
				ENSMUSG00000036218
				ENSMUSG00000053399
				ENSMUSG00000015377
				ENSMUSG00000071266
				ENSMUSG00000024942
				ENSMUSG00000020593
				ENSMUSG00000043484
				ENSMUSG00000097961
				ENSMUSG00000028974
				ENSMUSG00000042105
				ENSMUSG00000058881
				ENSMUSG00000002763
				ENSMUSG00000070407
				ENSMUSG00000020086
				ENSMUSG00000067377
				ENSMUSG00000007613
				ENSMUSG00000034684
				ENSMUSG00000064080
				ENSMUSG00000050640
				ENSMUSG00000035606
				ENSMUSG00000051067
				ENSMUSG00000025425
				ENSMUSG00000074151
				ENSMUSG00000042810
				ENSMUSG00000118426
				ENSMUSG00000033768
				ENSMUSG00000003418
				ENSMUSG00000059288
				ENSMUSG00000032586
				ENSMUSG00000095217
				ENSMUSG00000020696
				ENSMUSG00000091722
				ENSMUSG00000026179
				ENSMUSG00000014329
				ENSMUSG00000072872
				ENSMUSG00000022095
				ENSMUSG00000023755
				ENSMUSG00000036040
				ENSMUSG00000040152
				ENSMUSG00000050288
				ENSMUSG00000055184
				ENSMUSG00000032564
				ENSMUSG00000039579
				ENSMUSG00000027955
				ENSMUSG00000038844
				ENSMUSG00000027534
				ENSMUSG00000107451
				ENSMUSG00000021259
				ENSMUSG00000095193
				ENSMUSG00000034000
				ENSMUSG00000075585
				ENSMUSG00000007207
				ENSMUSG00000078302
				ENSMUSG00000093773
				ENSMUSG00000039304
				ENSMUSG00000034551
				ENSMUSG00000097164
				ENSMUSG00000000489
				ENSMUSG00000030020
				ENSMUSG00000059182
				ENSMUSG00000031661
				ENSMUSG00000052581
				ENSMUSG00000002580
				ENSMUSG00000021929
				ENSMUSG00000022257
				ENSMUSG00000028883
				ENSMUSG00000031026
				ENSMUSG00000031765
				ENSMUSG00000044633
				ENSMUSG00000052921
				ENSMUSG00000055435
				ENSMUSG00000056296
				ENSMUSG00000057246
				ENSMUSG00000075053
				ENSMUSG00000090963
				ENSMUSG00000042532
				ENSMUSG00000018841
				ENSMUSG00000024598
				ENSMUSG00000026932
				ENSMUSG00000070644
				ENSMUSG00000110996
				ENSMUSG00000024066
				ENSMUSG00000028347
				ENSMUSG00000027568
				ENSMUSG00000072235
				ENSMUSG00000049241
				ENSMUSG00000052566
				ENSMUSG00000017132
				ENSMUSG00000066760
				ENSMUSG00000079654
				ENSMUSG00000020176
				ENSMUSG00000024621
				ENSMUSG00000085125
				ENSMUSG00000095789
				ENSMUSG00000110393
				ENSMUSG00000035268
				ENSMUSG00000086179
				ENSMUSG00000027803
				ENSMUSG00000035506
				ENSMUSG00000010592
				ENSMUSG00000079507
				ENSMUSG00000027820
				ENSMUSG00000050530
				ENSMUSG00000001525
				ENSMUSG00000016477
				ENSMUSG00000094421
				ENSMUSG00000003363
				ENSMUSG00000038235
				ENSMUSG00000026955
				ENSMUSG00000103882
				ENSMUSG00000073982
				ENSMUSG00000098198
				ENSMUSG00000069227
				ENSMUSG00000022577
				ENSMUSG00000037703
				ENSMUSG00000025758
				ENSMUSG00000006519
				ENSMUSG00000024937
				ENSMUSG00000033960
				ENSMUSG00000041617
				ENSMUSG00000010797
				ENSMUSG00000047497
				ENSMUSG00000048373
				ENSMUSG00000031343
				ENSMUSG00000021913
				ENSMUSG00000049036
				ENSMUSG00000041592
				ENSMUSG00000100480
				ENSMUSG00000021680
				ENSMUSG00000041423
				ENSMUSG00000021534
				ENSMUSG00000082286
				ENSMUSG00000040084
				ENSMUSG00000031628
				ENSMUSG00000103947
				ENSMUSG00000028176
				ENSMUSG00000031489
				ENSMUSG00000033207
				ENSMUSG00000034209
				ENSMUSG00000056267
				ENSMUSG00000105876
				ENSMUSG00000107374
				ENSMUSG00000025357
				ENSMUSG00000043635
				ENSMUSG00000104362
				ENSMUSG00000033594
				ENSMUSG00000117662
				ENSMUSG00000031736
				ENSMUSG00000019916
				ENSMUSG00000063229
				ENSMUSG00000025810
				ENSMUSG00000030670
				ENSMUSG00000046794
				ENSMUSG00000099875
				ENSMUSG00000023951
				ENSMUSG00000027660
				ENSMUSG00000018217
				ENSMUSG00000018459
				ENSMUSG00000061046
				ENSMUSG00000020099
				ENSMUSG00000057554
				ENSMUSG00000060402
				ENSMUSG00000025321
				ENSMUSG00000034308
				ENSMUSG00000049401
				ENSMUSG00000030109
				ENSMUSG00000015476
				ENSMUSG00000071076
				ENSMUSG00000032911
				ENSMUSG00000001166
				ENSMUSG00000029098
				ENSMUSG00000021585
				ENSMUSG00000022358
				ENSMUSG00000037979
				ENSMUSG00000072620
				ENSMUSG00000085873
				ENSMUSG00000004460
				ENSMUSG00000023945
				ENSMUSG00000086015
				ENSMUSG00000039286
				ENSMUSG00000020658
				ENSMUSG00000034636
				ENSMUSG00000091742
				ENSMUSG00000028785
				ENSMUSG00000097350
				ENSMUSG00000066152
				ENSMUSG00000026249
				ENSMUSG00000031750
				ENSMUSG00000078794
				ENSMUSG00000039997
				ENSMUSG00000036197
				ENSMUSG00000054545
				ENSMUSG00000024339
				ENSMUSG00000047415
				ENSMUSG00000026235
				ENSMUSG00000039518
				ENSMUSG00000057716
				ENSMUSG00000073295
				ENSMUSG00000105942
				ENSMUSG00000110010
				ENSMUSG00000047591
				ENSMUSG00000072214
				ENSMUSG00000035632
				ENSMUSG00000057836
				ENSMUSG00000090066
				ENSMUSG00000000884
				ENSMUSG00000004936
				ENSMUSG00000026558
				ENSMUSG00000071757
				ENSMUSG00000027298
				ENSMUSG00000028341
				ENSMUSG00000037419
				ENSMUSG00000109205
				ENSMUSG00000090958
				ENSMUSG00000058126
				ENSMUSG00000109435
				ENSMUSG00000028782
				ENSMUSG00000033953
				ENSMUSG00000040797
				ENSMUSG00000029335
				ENSMUSG00000037474
				ENSMUSG00000102526
				ENSMUSG00000045532
				ENSMUSG00000030878
				ENSMUSG00000015354
				ENSMUSG00000055745
				ENSMUSG00000024892
				ENSMUSG00000027931
				ENSMUSG00000023826
				ENSMUSG00000001119
				ENSMUSG00000024856
				ENSMUSG00000031983
				ENSMUSG00000032121
				ENSMUSG00000033715
				ENSMUSG00000052848
				ENSMUSG00000092569
				ENSMUSG00000115569
				ENSMUSG00000117098
				ENSMUSG00000000682
				ENSMUSG00000037638
				ENSMUSG00000118364
				ENSMUSG00000055540
				ENSMUSG00000085167
				ENSMUSG00000093651
				ENSMUSG00000024511
				ENSMUSG00000021032
				ENSMUSG00000021613
				ENSMUSG00000026034
				ENSMUSG00000032322
				ENSMUSG00000035637
				ENSMUSG00000052336
				ENSMUSG00000027227
				ENSMUSG00000032718
				ENSMUSG00000043461
				ENSMUSG00000118841
				ENSMUSG00000026494
				ENSMUSG00000038400
				ENSMUSG00000046844
				ENSMUSG00000117864
				ENSMUSG00000054675
				ENSMUSG00000023186
				ENSMUSG00000036052
				ENSMUSG00000018427
				ENSMUSG00000051674
				ENSMUSG00000063160
				ENSMUSG00000063511
				ENSMUSG00000074607
				ENSMUSG00000078640
				ENSMUSG00000115867
				ENSMUSG00000018566
				ENSMUSG00000036820
				ENSMUSG00000054021
				ENSMUSG00000100147
				ENSMUSG00000066687
				ENSMUSG00000115041
				ENSMUSG00000056755
				ENSMUSG00000031278
				ENSMUSG00000041624
				ENSMUSG00000085022
				ENSMUSG00000006720
				ENSMUSG00000012609
				ENSMUSG00000026222
				ENSMUSG00000027009
				ENSMUSG00000029352
				ENSMUSG00000029695
				ENSMUSG00000031833
				ENSMUSG00000043411
				ENSMUSG00000044393
				ENSMUSG00000050323
				ENSMUSG00000051351
				ENSMUSG00000067369
				ENSMUSG00000067629
				ENSMUSG00000071753
				ENSMUSG00000075271
				ENSMUSG00000110020
				ENSMUSG00000021866
				ENSMUSG00000043964
				ENSMUSG00000053025
				ENSMUSG00000001663
				ENSMUSG00000031422
				ENSMUSG00000038793
				ENSMUSG00000045268
				ENSMUSG00000110795
				ENSMUSG00000026452
				ENSMUSG00000032311
				ENSMUSG00000024896
				ENSMUSG00000007872
				ENSMUSG00000048004
				ENSMUSG00000040009
				ENSMUSG00002075745
				ENSMUSG00000040037
				ENSMUSG00000092090
				ENSMUSG00000097305
				ENSMUSG00000115481
				ENSMUSG00000090626
				ENSMUSG00000031209
				ENSMUSG00000051278
				ENSMUSG00000033885
				ENSMUSG00000021448
				ENSMUSG00000050711
				ENSMUSG00000094786
				ENSMUSG00000117613
				ENSMUSG00000104030
				ENSMUSG00000110649
				ENSMUSG00000006127
				ENSMUSG00000037185
				ENSMUSG00000057706
				ENSMUSG00000074384
				ENSMUSG00000087301
				ENSMUSG00000026275
				ENSMUSG00000034685
				ENSMUSG00000063297
				ENSMUSG00000104960
				ENSMUSG00000028541
				ENSMUSG00000029330
				ENSMUSG00000058488
				ENSMUSG00000070942
				ENSMUSG00000085526
				ENSMUSG00000097296
				ENSMUSG00000103280
				ENSMUSG00000021115
				ENSMUSG00000061740
				ENSMUSG00000032254
				ENSMUSG00000072762
				ENSMUSG00000062382
				ENSMUSG00000021720
				ENSMUSG00000045294
				ENSMUSG00000010936
				ENSMUSG00000027500
				ENSMUSG00000034522
				ENSMUSG00000028804
				ENSMUSG00000077666
				ENSMUSG00000028150
				ENSMUSG00000038622
				ENSMUSG00000021792
				ENSMUSG00000026632
				ENSMUSG00000027187
				ENSMUSG00000029490
				ENSMUSG00000034532
				ENSMUSG00000042589
				ENSMUSG00000045409
				ENSMUSG00000047875
				ENSMUSG00000063430
				ENSMUSG00000117877
				ENSMUSG00000026548
				ENSMUSG00000100210
				ENSMUSG00000085565
				ENSMUSG00000033361
				ENSMUSG00000018822
				ENSMUSG00000016206
				ENSMUSG00000030098
				ENSMUSG00000031217
				ENSMUSG00000118084
				ENSMUSG00000021930
				ENSMUSG00000020325
				ENSMUSG00000045629
				ENSMUSG00000047643
				ENSMUSG00000040097
				ENSMUSG00000100975
				ENSMUSG00000026255
				ENSMUSG00000031558
				ENSMUSG00000068551
				ENSMUSG00000034402
				ENSMUSG00000061028
				ENSMUSG00000069274
				ENSMUSG00000016179
				ENSMUSG00000032652
				ENSMUSG00000040118
				ENSMUSG00000067879
				ENSMUSG00000082063
				ENSMUSG00000069763
				ENSMUSG00000009013
				ENSMUSG00000098202
				ENSMUSG00000035847
				ENSMUSG00000021536
				ENSMUSG00000035078
				ENSMUSG00000032352
				ENSMUSG00000035486
				ENSMUSG00000064872
				ENSMUSG00000097532
				ENSMUSG00000038593
				ENSMUSG00000026278
				ENSMUSG00000036304
				ENSMUSG00000041939
				ENSMUSG00000043670
				ENSMUSG00000045094
				ENSMUSG00000056665
				ENSMUSG00000022769
				ENSMUSG00000029076
				ENSMUSG00000084033
				ENSMUSG00000036634
				ENSMUSG00000014786
				ENSMUSG00000060063
				ENSMUSG00000063060
				ENSMUSG00000020183
				ENSMUSG00000039519
				ENSMUSG00000052387
				ENSMUSG00000017670
				ENSMUSG00000027447
				ENSMUSG00000031139
				ENSMUSG00000031562
				ENSMUSG00000031932
				ENSMUSG00000045625
				ENSMUSG00000049285
				ENSMUSG00000051537
				ENSMUSG00000053897
				ENSMUSG00000097115
				ENSMUSG00000110067
				ENSMUSG00000117648
				ENSMUSG00000033107
				ENSMUSG00000037010
				ENSMUSG00000060962
				ENSMUSG00000041911
				ENSMUSG00000029404
				ENSMUSG00000106275
				ENSMUSG00000058975
				ENSMUSG00000006373
				ENSMUSG00000030340
				ENSMUSG00000037892
				ENSMUSG00000108325
				ENSMUSG00000062488
				ENSMUSG00000062014
				ENSMUSG00000051343
				ENSMUSG00000014158
				ENSMUSG00000021708
				ENSMUSG00000041961
				ENSMUSG00000017677
				ENSMUSG00000113560
				ENSMUSG00000085611
				ENSMUSG00000097028
				ENSMUSG00000073600
				ENSMUSG00000112096
				ENSMUSG00000042305
				ENSMUSG00000060012
				ENSMUSG00000034842
				ENSMUSG00000004880
				ENSMUSG00000020889
				ENSMUSG00000027953
				ENSMUSG00000032705
				ENSMUSG00000037469
				ENSMUSG00000117310
				ENSMUSG00000023959
				ENSMUSG00000024597
				ENSMUSG00000026889
				ENSMUSG00000027001
				ENSMUSG00000035413
				ENSMUSG00000038260
				ENSMUSG00000043415
				ENSMUSG00000099686
				ENSMUSG00000004366
				ENSMUSG00000022793
				ENSMUSG00000023990
				ENSMUSG00000028933
				ENSMUSG00000031432
				ENSMUSG00000037395
				ENSMUSG00000040265
				ENSMUSG00000048677
				ENSMUSG00000051041
				ENSMUSG00000074361
				ENSMUSG00000090223
				ENSMUSG00000097842
				ENSMUSG00000105366
				ENSMUSG00000118866
				ENSMUSG00000001773
				ENSMUSG00000015202
				ENSMUSG00000103174
				ENSMUSG00000104454
				ENSMUSG00000039787
				ENSMUSG00000047197
				ENSMUSG00000038807
				ENSMUSG00000033061
				ENSMUSG00000102336
				ENSMUSG00000114179
				ENSMUSG00000041852
				ENSMUSG00000028661
				ENSMUSG00000044285
				ENSMUSG00000086003
				ENSMUSG00000035357
				ENSMUSG00000045767
				ENSMUSG00000022883
				ENSMUSG00000038178
				ENSMUSG00000044921
				ENSMUSG00000005057
				ENSMUSG00000050071
				ENSMUSG00000039199
				ENSMUSG00000032402
				ENSMUSG00000068373
				ENSMUSG00000029456
				ENSMUSG00000030103
				ENSMUSG00000054934
				ENSMUSG00000046324
				ENSMUSG00000022416
				ENSMUSG00000026509
				ENSMUSG00000037940
				ENSMUSG00000045731
				ENSMUSG00000029343
				ENSMUSG00000025017
				ENSMUSG00000036641
				ENSMUSG00000040258
				ENSMUSG00000042293
				ENSMUSG00000045322
				ENSMUSG00000101621
				ENSMUSG00000074521
				ENSMUSG00000017978

## Sheet: HIP YvM
DESeq2		edgeR		Cuffdiff		Consensus	Name
ENSMUSG00000118642		ENSMUSG00000118642		ENSMUSG00000001506		ENSMUSG00000118642	AY036118
ENSMUSG00000035551		ENSMUSG00000035551		ENSMUSG00000003657		ENSMUSG00000035551	Igfbpl1
ENSMUSG00000037708		ENSMUSG00000119584		ENSMUSG00000004951		ENSMUSG00000037708	Spag6
ENSMUSG00000098973		ENSMUSG00000098973		ENSMUSG00000013076		ENSMUSG00000098973	Mir6236
ENSMUSG00000119584		ENSMUSG00000046764		ENSMUSG00000015202		ENSMUSG00000119584	Rn18s-rs5
ENSMUSG00000115529		ENSMUSG00000037708		ENSMUSG00000015843		ENSMUSG00000115529	9630013A20Rik
ENSMUSG00000073418		ENSMUSG00000073418		ENSMUSG00000019966		ENSMUSG00000073418	C4b
ENSMUSG00000046764		ENSMUSG00000032446		ENSMUSG00000020178		ENSMUSG00000046764	A530053G22Rik
ENSMUSG00000020914		ENSMUSG00000115529		ENSMUSG00000020599		ENSMUSG00000020914	Top2a
ENSMUSG00000103332		ENSMUSG00000020914		ENSMUSG00000020914		ENSMUSG00000103332	Pcdhga2
ENSMUSG00000031004		ENSMUSG00000031004		ENSMUSG00000020953		ENSMUSG00000031004	Mki67
ENSMUSG00000063632		ENSMUSG00000029005		ENSMUSG00000021478		ENSMUSG00000063632	Sox11
ENSMUSG00000051599		ENSMUSG00000103332		ENSMUSG00000021609		ENSMUSG00000051599	Pcdhb2
ENSMUSG00000029005		ENSMUSG00000063632		ENSMUSG00000021948		ENSMUSG00000029005	Draxin
ENSMUSG00000098132		ENSMUSG00000114189		ENSMUSG00000022033		ENSMUSG00000098132	Rassf10
ENSMUSG00000029826		ENSMUSG00000098132		ENSMUSG00000023274		ENSMUSG00000029826	Zc3hav1
ENSMUSG00000051242		ENSMUSG00000069267		ENSMUSG00000024164		ENSMUSG00000051242	Pcdhb9
ENSMUSG00000026605		ENSMUSG00000041828		ENSMUSG00000024810		ENSMUSG00000026605	Cenpf
ENSMUSG00000032446		ENSMUSG00000051242		ENSMUSG00000024966		ENSMUSG00000032446	Eomes
ENSMUSG00000113342		ENSMUSG00000104264		ENSMUSG00000024985		ENSMUSG00000034810	Scn7a
ENSMUSG00000034810		ENSMUSG00000029826		ENSMUSG00000026475		ENSMUSG00000041828	Abca8a
ENSMUSG00000041828		ENSMUSG00000051599		ENSMUSG00000026822		ENSMUSG00000114189	9330199G10Rik
ENSMUSG00000114189		ENSMUSG00000026822		ENSMUSG00000028364		ENSMUSG00000025578	Cbx8
ENSMUSG00000025578		ENSMUSG00000028364		ENSMUSG00000029563		ENSMUSG00000069267	H3c2
ENSMUSG00000069267		ENSMUSG00000052229		ENSMUSG00000029826		ENSMUSG00000044042	Fmn1
ENSMUSG00000044042		ENSMUSG00000041431		ENSMUSG00000031004		ENSMUSG00000104264	Gm18529
ENSMUSG00000104264		ENSMUSG00000026605		ENSMUSG00000031551		ENSMUSG00000038943	Prc1
ENSMUSG00000038943		ENSMUSG00000114479		ENSMUSG00000032259		ENSMUSG00000028864	Hgf
ENSMUSG00000040204		ENSMUSG00000038943		ENSMUSG00000032338		ENSMUSG00000117254	Gm34567
ENSMUSG00000028864		ENSMUSG00000034810		ENSMUSG00000033453		ENSMUSG00000028364	Tnc
ENSMUSG00000117254		ENSMUSG00000024164		ENSMUSG00000034810		ENSMUSG00000045689	Pcdhb4
ENSMUSG00000028364		ENSMUSG00000117254		ENSMUSG00000035274		ENSMUSG00000024164	C3
ENSMUSG00000045689		ENSMUSG00000053399		ENSMUSG00000035551		ENSMUSG00000033952	Aspm
ENSMUSG00000024164		ENSMUSG00000035202		ENSMUSG00000040624		ENSMUSG00000053399	Adamts18
ENSMUSG00000033952		ENSMUSG00000033952		ENSMUSG00000041046		ENSMUSG00000114479	Gm49375
ENSMUSG00000053399		ENSMUSG00000098758		ENSMUSG00000042388		ENSMUSG00000052229	Gpr17
ENSMUSG00000114479		ENSMUSG00000022033		ENSMUSG00000043013		ENSMUSG00000041431	Ccnb1
ENSMUSG00000052229		ENSMUSG00000001506		ENSMUSG00000045573		ENSMUSG00000035202	Lars2
ENSMUSG00000041431		ENSMUSG00000030223		ENSMUSG00000046480		ENSMUSG00000045876	Pcdhb8
ENSMUSG00000035202		ENSMUSG00000021765		ENSMUSG00000046764		ENSMUSG00000024534	Sncaip
ENSMUSG00000045876		ENSMUSG00000021948		ENSMUSG00000046922		ENSMUSG00000001506	Col1a1
ENSMUSG00000096107		ENSMUSG00000041460		ENSMUSG00000048572		ENSMUSG00000021765	Fst
ENSMUSG00000024534		ENSMUSG00000026475		ENSMUSG00000049225		ENSMUSG00000030223	Ptpro
ENSMUSG00000001506		ENSMUSG00000045876		ENSMUSG00000050541		ENSMUSG00000041460	Cacna2d4
ENSMUSG00000021765		ENSMUSG00000028864		ENSMUSG00000052229		ENSMUSG00000074704	Rad21l
ENSMUSG00000030223		ENSMUSG00000029661		ENSMUSG00000056999		ENSMUSG00000064655	Gm25788
ENSMUSG00000041460		ENSMUSG00000031494		ENSMUSG00000057719		ENSMUSG00000098758	7630403G23Rik
ENSMUSG00000074704		ENSMUSG00000095041		ENSMUSG00000061718		ENSMUSG00000048070	Pirt
ENSMUSG00000064655		ENSMUSG00000045689		ENSMUSG00000062151		ENSMUSG00000046805	Mpeg1
ENSMUSG00000047307		ENSMUSG00000092837		ENSMUSG00000063632		ENSMUSG00000029661	Col1a2
ENSMUSG00000098758		ENSMUSG00000043313		ENSMUSG00000064179		ENSMUSG00000021453	Gadd45g
ENSMUSG00000048070		ENSMUSG00000001228		ENSMUSG00000065176		ENSMUSG00000026822	Lcn2
ENSMUSG00000046805		ENSMUSG00000086537		ENSMUSG00000065701		ENSMUSG00000043313	Pcdhb19
ENSMUSG00000029661		ENSMUSG00000115422		ENSMUSG00000068696		ENSMUSG00000063626	Unc5d
ENSMUSG00000021453		ENSMUSG00000074704		ENSMUSG00000069267		ENSMUSG00000092837	Rpph1
ENSMUSG00000026822		ENSMUSG00000044042		ENSMUSG00000070436		ENSMUSG00000001228	Uhrf1
ENSMUSG00000026380		ENSMUSG00000025578		ENSMUSG00000071234		ENSMUSG00000026475	Rgs16
ENSMUSG00000027932		ENSMUSG00000051663		ENSMUSG00000073418		ENSMUSG00000111669	Gm31698
ENSMUSG00000043313		ENSMUSG00002075512		ENSMUSG00000074634		ENSMUSG00000022033	Pbk
ENSMUSG00000063626		ENSMUSG00000111669		ENSMUSG00000075053		ENSMUSG00000030796	Tead2
ENSMUSG00000092837		ENSMUSG00000087819		ENSMUSG00000076617		ENSMUSG00000036036	Zfp57
ENSMUSG00000025479		ENSMUSG00000036036		ENSMUSG00000089809		ENSMUSG00000063297	Luzp2
ENSMUSG00000001228		ENSMUSG00000064655		ENSMUSG00000090223		ENSMUSG00000021948	Prkcd
ENSMUSG00000026475		ENSMUSG00000048070		ENSMUSG00000095041		ENSMUSG00000031494	Cd209a
ENSMUSG00000111669		ENSMUSG00000024534		ENSMUSG00000098132		ENSMUSG00000095041	ENSMUSG00000095041
ENSMUSG00000022033		ENSMUSG00000063626		ENSMUSG00000098758		ENSMUSG00000115422	4930452G13Rik
ENSMUSG00000010461		ENSMUSG00000063297		ENSMUSG00000104674		ENSMUSG00000087819	Gm25117
ENSMUSG00000109874		ENSMUSG00000030796		ENSMUSG00000114189		ENSMUSG00000086537	Gnasas1
ENSMUSG00000030796		ENSMUSG00000021453		ENSMUSG00000117254		ENSMUSG00000051663	Pcdhb1
ENSMUSG00000012443		ENSMUSG00000035274		ENSMUSG00000118642		ENSMUSG00000035274	Tpbg
ENSMUSG00000028639		ENSMUSG00000046805		ENSMUSG00000118790		ENSMUSG00002075512	7SK
ENSMUSG00000036036				ENSMUSG00000119520		ENSMUSG00000033453	Adamts15
ENSMUSG00000078117				ENSMUSG00000119584		ENSMUSG00000041046	Ramp3
ENSMUSG00000031170				ENSMUSG00002074925		ENSMUSG00000104674	Gm42756
ENSMUSG00000063297				ENSMUSG00000021108
ENSMUSG00000021948				ENSMUSG00000021760
ENSMUSG00000044043				ENSMUSG00000022769
ENSMUSG00000031494				ENSMUSG00000031494
ENSMUSG00000047632				ENSMUSG00000032368
ENSMUSG00000019787				ENSMUSG00000041828
ENSMUSG00000065259				ENSMUSG00000088185
ENSMUSG00000095041				ENSMUSG00000012428
ENSMUSG00000028678				ENSMUSG00000040972
ENSMUSG00000049436				ENSMUSG00000057337
ENSMUSG00000059182				ENSMUSG00000061762
ENSMUSG00000115422				ENSMUSG00000022949
ENSMUSG00000026303				ENSMUSG00000026579
ENSMUSG00000020354				ENSMUSG00000041431
ENSMUSG00000087819				ENSMUSG00000050473
ENSMUSG00000028640				ENSMUSG00000063297
ENSMUSG00000086537
ENSMUSG00000064344
ENSMUSG00000103793
ENSMUSG00000076431
ENSMUSG00000077457
ENSMUSG00000051663
ENSMUSG00000037725
ENSMUSG00000107451
ENSMUSG00000018589
ENSMUSG00000112968
ENSMUSG00000035274
ENSMUSG00000077704
ENSMUSG00000119073
ENSMUSG00000104093
ENSMUSG00002075512
ENSMUSG00000092312
ENSMUSG00000051678
ENSMUSG00000105980
ENSMUSG00000033453
ENSMUSG00000041046
ENSMUSG00000104674
ENSMUSG00000119227

## Sheet: HIP YvO
DESeq2		edgeR		Cuffdiff		Consensus	Name
ENSMUSG00000073418		ENSMUSG00000073418		ENSMUSG00000000031		ENSMUSG00000073418	C4b
ENSMUSG00000118642		ENSMUSG00000113342		ENSMUSG00000000682		ENSMUSG00000118642	AY036118
ENSMUSG00000037708		ENSMUSG00000118642		ENSMUSG00000001020		ENSMUSG00000037708	Spag6
ENSMUSG00000079293		ENSMUSG00000119584		ENSMUSG00000001025		ENSMUSG00000079293	Clec7a
ENSMUSG00000020932		ENSMUSG00000079293		ENSMUSG00000003657		ENSMUSG00000020932	Gfap
ENSMUSG00000056999		ENSMUSG00000035551		ENSMUSG00000004707		ENSMUSG00000056999	Ide
ENSMUSG00000119584		ENSMUSG00000046764		ENSMUSG00000004730		ENSMUSG00000119584	Rn18s-rs5
ENSMUSG00000035551		ENSMUSG00000068129		ENSMUSG00000005087		ENSMUSG00000035551	Igfbpl1
ENSMUSG00000030789		ENSMUSG00000049723		ENSMUSG00000010122		ENSMUSG00000030789	Itgax
ENSMUSG00000046805		ENSMUSG00000030789		ENSMUSG00000015202		ENSMUSG00000046805	Mpeg1
ENSMUSG00000046764		ENSMUSG00000037708		ENSMUSG00000015355		ENSMUSG00000046764	A530053G22Rik
ENSMUSG00000068129		ENSMUSG00000056999		ENSMUSG00000015484		ENSMUSG00000068129	Cst7
ENSMUSG00000024164		ENSMUSG00000004707		ENSMUSG00000018819		ENSMUSG00000024164	C3
ENSMUSG00000004707		ENSMUSG00000020932		ENSMUSG00000020178		ENSMUSG00000004707	Ly9
ENSMUSG00000098973		ENSMUSG00000024164		ENSMUSG00000020599		ENSMUSG00000098973	Mir6236
ENSMUSG00000051242		ENSMUSG00000046805		ENSMUSG00000020914		ENSMUSG00000051242	Pcdhb9
ENSMUSG00000029826		ENSMUSG00000098973		ENSMUSG00000020932		ENSMUSG00000029826	Zc3hav1
ENSMUSG00000035778		ENSMUSG00000022218		ENSMUSG00000020953		ENSMUSG00000035778	Ggta1
ENSMUSG00000113342		ENSMUSG00000030577		ENSMUSG00000021091		ENSMUSG00000113342	AA414992
ENSMUSG00000037686		ENSMUSG00000096107		ENSMUSG00000021097		ENSMUSG00000037686	Aspg
ENSMUSG00000115529		ENSMUSG00000051242		ENSMUSG00000021108		ENSMUSG00000115529	9630013A20Rik
ENSMUSG00000029816		ENSMUSG00000069516		ENSMUSG00000021478		ENSMUSG00000029816	Gpnmb
ENSMUSG00000069516		ENSMUSG00000115529		ENSMUSG00000021680		ENSMUSG00000069516	Lyz2
ENSMUSG00000031004		ENSMUSG00000095041		ENSMUSG00000021760		ENSMUSG00000031004	Mki67
ENSMUSG00000030577		ENSMUSG00000038642		ENSMUSG00000021948		ENSMUSG00000030577	Cd22
ENSMUSG00000038642		ENSMUSG00000031004		ENSMUSG00000022425		ENSMUSG00000038642	Ctss
ENSMUSG00000057596		ENSMUSG00000029816		ENSMUSG00000022548		ENSMUSG00000057596	Trim30d
ENSMUSG00000049723		ENSMUSG00000032446		ENSMUSG00000022949		ENSMUSG00000049723	Mmp12
ENSMUSG00000027995		ENSMUSG00000001131		ENSMUSG00000023992		ENSMUSG00000027995	Tlr2
ENSMUSG00000095041		ENSMUSG00000037686		ENSMUSG00000024164		ENSMUSG00000095041	ENSMUSG00000095041
ENSMUSG00000051599		ENSMUSG00000051599		ENSMUSG00000024810		ENSMUSG00000051599	Pcdhb2
ENSMUSG00000024338		ENSMUSG00000029826		ENSMUSG00000024985		ENSMUSG00000024338	Psmb8
ENSMUSG00000022218		ENSMUSG00000041828		ENSMUSG00000025888		ENSMUSG00000022218	Tgm1
ENSMUSG00000026605		ENSMUSG00000038540		ENSMUSG00000026380		ENSMUSG00000026605	Cenpf
ENSMUSG00000096107		ENSMUSG00000073555		ENSMUSG00000026395		ENSMUSG00000096107	Gm16505
ENSMUSG00000038540		ENSMUSG00000019787		ENSMUSG00000026475		ENSMUSG00000038540	Tmc3
ENSMUSG00000038147		ENSMUSG00000074896		ENSMUSG00000026548		ENSMUSG00000038147	Cd84
ENSMUSG00000062488		ENSMUSG00000073411		ENSMUSG00000026579		ENSMUSG00000062488	Ifit3b
ENSMUSG00000078881		ENSMUSG00000027995		ENSMUSG00000026728		ENSMUSG00000047632	Fgfbp3
ENSMUSG00000047632		ENSMUSG00000035778		ENSMUSG00000026822		ENSMUSG00000041828	Abca8a
ENSMUSG00000041828		ENSMUSG00000022548		ENSMUSG00000027985		ENSMUSG00000030921	Trim30a
ENSMUSG00000030921		ENSMUSG00000021091		ENSMUSG00000027995		ENSMUSG00000015355	Cd48
ENSMUSG00000015355		ENSMUSG00000015355		ENSMUSG00000028082		ENSMUSG00000046879	Irgm1
ENSMUSG00000046879		ENSMUSG00000020914		ENSMUSG00000028364		ENSMUSG00000023992	Trem2
ENSMUSG00000023992		ENSMUSG00000112968		ENSMUSG00000028661		ENSMUSG00000040565	Btaf1
ENSMUSG00000040565		ENSMUSG00000036896		ENSMUSG00000029304		ENSMUSG00000074896	Ifit3
ENSMUSG00000074896		ENSMUSG00000062488		ENSMUSG00000029561		ENSMUSG00000073555	Gm4951
ENSMUSG00000073555		ENSMUSG00000073489		ENSMUSG00000029563		ENSMUSG00000049436	Upk1b
ENSMUSG00000049436		ENSMUSG00000038943		ENSMUSG00000029816		ENSMUSG00000073411	H2-D1
ENSMUSG00000073411		ENSMUSG00000026605		ENSMUSG00000029826		ENSMUSG00000036896	C1qc
ENSMUSG00000036896		ENSMUSG00000049436		ENSMUSG00000030107		ENSMUSG00000030579	Tyrobp
ENSMUSG00000030579		ENSMUSG00000104264		ENSMUSG00000030111		ENSMUSG00000004730	Adgre1
ENSMUSG00000004730		ENSMUSG00000112148		ENSMUSG00000030577		ENSMUSG00000038943	Prc1
ENSMUSG00000038943		ENSMUSG00000000682		ENSMUSG00000030579		ENSMUSG00000045689	Pcdhb4
ENSMUSG00000045689		ENSMUSG00000026728		ENSMUSG00000030789		ENSMUSG00000040552	C3ar1
ENSMUSG00000040552		ENSMUSG00000030921		ENSMUSG00000030921		ENSMUSG00000015340	Cybb
ENSMUSG00000015340		ENSMUSG00000001025		ENSMUSG00000031004		ENSMUSG00000020914	Top2a
ENSMUSG00000020914		ENSMUSG00000057596		ENSMUSG00000031239		ENSMUSG00000073489	Ifi204
ENSMUSG00000073489		ENSMUSG00000047632		ENSMUSG00000031551		ENSMUSG00000039891	Txlnb
ENSMUSG00000039891		ENSMUSG00000023992		ENSMUSG00000031790		ENSMUSG00000001025	S100a6
ENSMUSG00000001025		ENSMUSG00000045689		ENSMUSG00000032259		ENSMUSG00000044043	Pcdhb14
ENSMUSG00000044043		ENSMUSG00000030579		ENSMUSG00000032338		ENSMUSG00000018774	Cd68
ENSMUSG00000018774		ENSMUSG00000040565		ENSMUSG00000032368		ENSMUSG00000019787	Trdn
ENSMUSG00000019787		ENSMUSG00000060802		ENSMUSG00000032554		ENSMUSG00000078945	Naip2
ENSMUSG00000078945		ENSMUSG00000029005		ENSMUSG00000032690		ENSMUSG00000020143	Dock2
ENSMUSG00000020143		ENSMUSG00000024338		ENSMUSG00000034275		ENSMUSG00000073590	3222401L13Rik
ENSMUSG00000073590		ENSMUSG00000046879		ENSMUSG00000034459		ENSMUSG00000000682	Cd52
ENSMUSG00000000682		ENSMUSG00000038147		ENSMUSG00000034472		ENSMUSG00000010461	Eya4
ENSMUSG00000010461		ENSMUSG00000036887		ENSMUSG00000034810		ENSMUSG00000026728	Vim
ENSMUSG00000026728		ENSMUSG00000004730		ENSMUSG00000035551		ENSMUSG00000020256	Aldh1l2
ENSMUSG00000045502		ENSMUSG00000061232		ENSMUSG00000035778		ENSMUSG00000104264	Gm18529
ENSMUSG00000020256		ENSMUSG00000068699		ENSMUSG00000036169		ENSMUSG00000064267	Hvcn1
ENSMUSG00000104264		ENSMUSG00000052229		ENSMUSG00000036887		ENSMUSG00000001131	Timp1
ENSMUSG00000064267		ENSMUSG00000015340		ENSMUSG00000036896		ENSMUSG00000005087	Cd44
ENSMUSG00000001131		ENSMUSG00000078945		ENSMUSG00000036905		ENSMUSG00000056737	Capg
ENSMUSG00000005087		ENSMUSG00000040552		ENSMUSG00000037280		ENSMUSG00000022548	Apod
ENSMUSG00000056737		ENSMUSG00000036905		ENSMUSG00000037416		ENSMUSG00000021091	Serpina3n
ENSMUSG00000022548		ENSMUSG00000064358		ENSMUSG00000037686		ENSMUSG00000020120	Plek
ENSMUSG00000021091		ENSMUSG00000034459		ENSMUSG00000038007		ENSMUSG00000097415	AU020206
ENSMUSG00000020120		ENSMUSG00000043157		ENSMUSG00000038370		ENSMUSG00000047307	Pcdhb13
ENSMUSG00000097415		ENSMUSG00000051678		ENSMUSG00000038642		ENSMUSG00000037921	Ddx60
ENSMUSG00000047307		ENSMUSG00000056737		ENSMUSG00000039103		ENSMUSG00000060802	B2m
ENSMUSG00000037921		ENSMUSG00000097415		ENSMUSG00000039672		ENSMUSG00000112148	Lilrb4a
ENSMUSG00000060802		ENSMUSG00000005087		ENSMUSG00000040373		ENSMUSG00000036887	C1qa
ENSMUSG00000112148		ENSMUSG00000044043		ENSMUSG00000040552		ENSMUSG00000051678	Pcdhb6
ENSMUSG00000036887		ENSMUSG00000022033		ENSMUSG00000040565		ENSMUSG00000068699	Flnc
ENSMUSG00000040204		ENSMUSG00000037921		ENSMUSG00000041596		ENSMUSG00000029005	Draxin
ENSMUSG00000051678		ENSMUSG00000034855		ENSMUSG00000041828		ENSMUSG00000061232	H2-K1
ENSMUSG00000068699		ENSMUSG00000092624		ENSMUSG00000043157		ENSMUSG00000032446	Eomes
ENSMUSG00000029005		ENSMUSG00000115422		ENSMUSG00000043943		ENSMUSG00000037321	Tap1
ENSMUSG00000061232		ENSMUSG00000073409		ENSMUSG00000044811		ENSMUSG00000052160	Pld4
ENSMUSG00000032446		ENSMUSG00000073902		ENSMUSG00000045573		ENSMUSG00000059182	Skap2
ENSMUSG00000037321		ENSMUSG00000026380		ENSMUSG00000046480		ENSMUSG00000112968	Gm48530
ENSMUSG00000052160		ENSMUSG00000033880		ENSMUSG00000046764		ENSMUSG00000026395	Ptprc
ENSMUSG00000059182		ENSMUSG00000045876		ENSMUSG00000046805		ENSMUSG00000018927	Ccl6
ENSMUSG00000112968		ENSMUSG00000026395		ENSMUSG00000046879		ENSMUSG00000036905	C1qb
ENSMUSG00000026395		ENSMUSG00000021213		ENSMUSG00000046922		ENSMUSG00000034459	Ifit1
ENSMUSG00000018927		ENSMUSG00000050335		ENSMUSG00000047496		ENSMUSG00000000290	Itgb2
ENSMUSG00000036905		ENSMUSG00000025479		ENSMUSG00000047632		ENSMUSG00000006519	Cyba
ENSMUSG00000026285		ENSMUSG00000025888		ENSMUSG00000047735		ENSMUSG00000026380	Tfcp2l1
ENSMUSG00000034459		ENSMUSG00000020120		ENSMUSG00000049436		ENSMUSG00000043157	Arl11
ENSMUSG00000000290		ENSMUSG00000079017		ENSMUSG00000050063		ENSMUSG00000058715	Fcer1g
ENSMUSG00000006519		ENSMUSG00000023031		ENSMUSG00000050335		ENSMUSG00000023031	Cela1
ENSMUSG00000026380		ENSMUSG00000074151		ENSMUSG00000052229		ENSMUSG00000023367	Tmem176a
ENSMUSG00000043157		ENSMUSG00000044338		ENSMUSG00000052305		ENSMUSG00000040170	Fmo2
ENSMUSG00000058715		ENSMUSG00000029561		ENSMUSG00000052861		ENSMUSG00000045876	Pcdhb8
ENSMUSG00000023031		ENSMUSG00000030107		ENSMUSG00000054545		ENSMUSG00000033880	Lgals3bp
ENSMUSG00000023367		ENSMUSG00000018927		ENSMUSG00000056737		ENSMUSG00000073902	Gvin3
ENSMUSG00000040170		ENSMUSG00000064267		ENSMUSG00000056999		ENSMUSG00000043943	Naalad2
ENSMUSG00000045876		ENSMUSG00000028364		ENSMUSG00000057596		ENSMUSG00000034810	Scn7a
ENSMUSG00000033880		ENSMUSG00000043263		ENSMUSG00000058488		ENSMUSG00000023186	Vwa5a
ENSMUSG00000073902		ENSMUSG00000020143		ENSMUSG00000058620		ENSMUSG00000052229	Gpr17
ENSMUSG00000043943		ENSMUSG00000071068		ENSMUSG00000059498		ENSMUSG00000091556	Gm14569
ENSMUSG00000034810		ENSMUSG00000051663		ENSMUSG00000059898		ENSMUSG00000026656	Fcgr2b
ENSMUSG00000023186		ENSMUSG00000043943		ENSMUSG00000060802		ENSMUSG00000059498	Fcgr3
ENSMUSG00000052229		ENSMUSG00000018920		ENSMUSG00000061048		ENSMUSG00000025888	Casp1
ENSMUSG00000091556		ENSMUSG00000040170		ENSMUSG00000061232		ENSMUSG00000050335	Lgals3
ENSMUSG00000026656		ENSMUSG00000041596		ENSMUSG00000061718		ENSMUSG00000029307	Dmp1
ENSMUSG00000059498		ENSMUSG00000018819		ENSMUSG00000061808		ENSMUSG00000074151	Nlrc5
ENSMUSG00000025888		ENSMUSG00000056880		ENSMUSG00000062488		ENSMUSG00000030107	Usp18
ENSMUSG00000050335		ENSMUSG00000059498		ENSMUSG00000063632		ENSMUSG00000018920	Cxcl16
ENSMUSG00000074366		ENSMUSG00000026548		ENSMUSG00000064179		ENSMUSG00000029561	Oasl2
ENSMUSG00000029307		ENSMUSG00000073590		ENSMUSG00000064337		ENSMUSG00000071203	Naip5
ENSMUSG00000052469		ENSMUSG00000063632		ENSMUSG00000068129		ENSMUSG00000056880	Gadl1
ENSMUSG00000074151		ENSMUSG00000102516		ENSMUSG00000068323		ENSMUSG00000026177	Slc11a1
ENSMUSG00000030107		ENSMUSG00000047307		ENSMUSG00000068696		ENSMUSG00000115422	4930452G13Rik
ENSMUSG00000018920		ENSMUSG00000034810		ENSMUSG00000068699		ENSMUSG00000033355	Rtp4
ENSMUSG00000029561		ENSMUSG00000026656		ENSMUSG00000069267		ENSMUSG00000051486	Pcdhb11
ENSMUSG00000071203		ENSMUSG00000030223		ENSMUSG00000069516		ENSMUSG00000043458	Pcdhb12
ENSMUSG00000056880		ENSMUSG00000039891		ENSMUSG00000069917		ENSMUSG00000051506	Wdfy4
ENSMUSG00000026177		ENSMUSG00000020256		ENSMUSG00000069919		ENSMUSG00000016256	Ctsz
ENSMUSG00000115422		ENSMUSG00000029762		ENSMUSG00000071234		ENSMUSG00000063286	Gvin-ps7
ENSMUSG00000033355		ENSMUSG00000076617		ENSMUSG00000073409		ENSMUSG00000018819	Lsp1
ENSMUSG00000051486		ENSMUSG00000032690		ENSMUSG00000073411		ENSMUSG00000040483	Xaf1
ENSMUSG00000043458		ENSMUSG00000000290		ENSMUSG00000073418		ENSMUSG00000033777	Tlr13
ENSMUSG00000051506		ENSMUSG00000018774		ENSMUSG00000073489		ENSMUSG00000050708	Ftl1
ENSMUSG00000016256		ENSMUSG00000016256		ENSMUSG00000073555		ENSMUSG00000098132	Rassf10
ENSMUSG00000029919		ENSMUSG00000117254		ENSMUSG00000073940		ENSMUSG00000027932	Slc27a3
ENSMUSG00000063286		ENSMUSG00000058818		ENSMUSG00000074634		ENSMUSG00000029762	Akr1b8
ENSMUSG00000018819		ENSMUSG00000033355		ENSMUSG00000074896		ENSMUSG00000079017	Ifi27l2a
ENSMUSG00000040483		ENSMUSG00000098132		ENSMUSG00000076617		ENSMUSG00000063234	Gpr84
ENSMUSG00000028362		ENSMUSG00000010461		ENSMUSG00000078945		ENSMUSG00000102516	Gm38340
ENSMUSG00000033777		ENSMUSG00000026177		ENSMUSG00000079017		ENSMUSG00000078853	Igtp
ENSMUSG00000038507		ENSMUSG00000023186		ENSMUSG00000079293		ENSMUSG00000041460	Cacna2d4
ENSMUSG00000050708		ENSMUSG00000104713		ENSMUSG00000090223		ENSMUSG00000104713	Gbp6
ENSMUSG00000098132		ENSMUSG00000114479		ENSMUSG00000092274		ENSMUSG00000025592	Dach2
ENSMUSG00000027932		ENSMUSG00000037321		ENSMUSG00000093894		ENSMUSG00000044338	Aplnr
ENSMUSG00000029762		ENSMUSG00000114189		ENSMUSG00000095041		ENSMUSG00000034855	Cxcl10
ENSMUSG00000053541		ENSMUSG00000001228		ENSMUSG00000097415		ENSMUSG00000026548	Slamf9
ENSMUSG00000079017		ENSMUSG00000032034		ENSMUSG00000104674		ENSMUSG00000024501	Dpysl3
ENSMUSG00000063234		ENSMUSG00000071203		ENSMUSG00000104713		ENSMUSG00000001228	Uhrf1
ENSMUSG00000102516		ENSMUSG00000001506		ENSMUSG00000110631		ENSMUSG00000074704	Rad21l
ENSMUSG00000078853		ENSMUSG00000070327		ENSMUSG00000112148		ENSMUSG00000020399	Havcr2
ENSMUSG00000041460		ENSMUSG00000063234		ENSMUSG00000117254		ENSMUSG00000028364	Tnc
ENSMUSG00000104713		ENSMUSG00000041460		ENSMUSG00000118642		ENSMUSG00000070327	Rnf213
ENSMUSG00000025592		ENSMUSG00000028864		ENSMUSG00002074846		ENSMUSG00000021213	Akr1c13
ENSMUSG00000044338		ENSMUSG00000026043		ENSMUSG00002075795		ENSMUSG00000025479	Cyp2e1
ENSMUSG00000039264		ENSMUSG00000024810		ENSMUSG00000000386		ENSMUSG00000068245	Phf11d
ENSMUSG00000034855		ENSMUSG00000043458		ENSMUSG00000004655		ENSMUSG00000063632	Sox11
ENSMUSG00000026548		ENSMUSG00000047735		ENSMUSG00000009670		ENSMUSG00000051663	Pcdhb1
ENSMUSG00000024501		ENSMUSG00000068245		ENSMUSG00000013076		ENSMUSG00000073409	H2-Q6
ENSMUSG00000001228		ENSMUSG00000063687		ENSMUSG00000018920		ENSMUSG00000030223	Ptpro
ENSMUSG00000074704		ENSMUSG00000069267		ENSMUSG00000019787		ENSMUSG00000030966	Trim21
ENSMUSG00000020399		ENSMUSG00000091556		ENSMUSG00000020681		ENSMUSG00000021423	Ly86
ENSMUSG00000028364		ENSMUSG00000052305		ENSMUSG00000021448		ENSMUSG00000024300	Myo1f
ENSMUSG00000097194		ENSMUSG00000035352		ENSMUSG00000029762		ENSMUSG00000092624	Gm3654
ENSMUSG00000070327		ENSMUSG00000026628		ENSMUSG00000035929		ENSMUSG00000071068	Treml2
ENSMUSG00000021213		ENSMUSG00000103332		ENSMUSG00000039976		ENSMUSG00000028859	Csf3r
ENSMUSG00000025479		ENSMUSG00000069792		ENSMUSG00000040624		ENSMUSG00000000031	H19
ENSMUSG00000068245		ENSMUSG00000108113		ENSMUSG00000041046		ENSMUSG00000058818	Pirb
ENSMUSG00000063632		ENSMUSG00000051486		ENSMUSG00000047230		ENSMUSG00000032690	Oas2
ENSMUSG00000029484		ENSMUSG00000038224		ENSMUSG00000063286		ENSMUSG00000041596	Nlrp5-ps
ENSMUSG00000051663		ENSMUSG00000000982		ENSMUSG00000064339		ENSMUSG00000043263	Ifi209
ENSMUSG00000073409		ENSMUSG00000069919		ENSMUSG00000068245		ENSMUSG00000028864	Hgf
ENSMUSG00000030223		ENSMUSG00000006519		ENSMUSG00000070327		ENSMUSG00000005397	Nid1
ENSMUSG00000030966		ENSMUSG00000063286		ENSMUSG00000070469		ENSMUSG00000001506	Col1a1
ENSMUSG00000021423		ENSMUSG00000074704		ENSMUSG00000026656		ENSMUSG00000047250	Ptgs1
ENSMUSG00000024300		ENSMUSG00000113088		ENSMUSG00000028864		ENSMUSG00000022033	Pbk
ENSMUSG00000092624		ENSMUSG00000104674		ENSMUSG00000030223		ENSMUSG00000103332	Pcdhga2
ENSMUSG00000071068		ENSMUSG00000033952		ENSMUSG00000030307		ENSMUSG00000044811	Cd300c2
ENSMUSG00000028859		ENSMUSG00000009670		ENSMUSG00000031210		ENSMUSG00000030796	Tead2
ENSMUSG00000000031		ENSMUSG00000024985		ENSMUSG00000033453		ENSMUSG00000026043	Col3a1
ENSMUSG00000058818		ENSMUSG00000040483		ENSMUSG00000037708		ENSMUSG00000084890	A830036E02Rik
ENSMUSG00000032690		ENSMUSG00000052160		ENSMUSG00000038147		ENSMUSG00000063687	Pcdhb5
ENSMUSG00000041596		ENSMUSG00000045498		ENSMUSG00000062542		ENSMUSG00000096727	Psmb9
ENSMUSG00000043263		ENSMUSG00000047117		ENSMUSG00000005268		ENSMUSG00000047735	Samd9l
ENSMUSG00000028864		ENSMUSG00000022146		ENSMUSG00000025577		ENSMUSG00000076617	Ighm
ENSMUSG00000005397		ENSMUSG00000044811		ENSMUSG00000028268		ENSMUSG00000114479	Gm49375
ENSMUSG00000001506		ENSMUSG00000069917		ENSMUSG00000030500		ENSMUSG00000038224	Serpinf2
ENSMUSG00000047250		ENSMUSG00000070469		ENSMUSG00000030854		ENSMUSG00000026628	Atf3
ENSMUSG00000022033		ENSMUSG00000025592		ENSMUSG00000032890		ENSMUSG00000029994	Anxa4
ENSMUSG00000090675		ENSMUSG00000029307		ENSMUSG00000035352		ENSMUSG00000028971	Cort
ENSMUSG00000103332		ENSMUSG00000096727		ENSMUSG00000011171		ENSMUSG00000117254	Gm34567
ENSMUSG00000117239		ENSMUSG00000091649		ENSMUSG00000020399		ENSMUSG00000024397	Aif1
ENSMUSG00000044811		ENSMUSG00000025498		ENSMUSG00000020428		ENSMUSG00000026303	Mlph
ENSMUSG00000030796		ENSMUSG00000100586		ENSMUSG00000026628		ENSMUSG00000104674	Gm42756
ENSMUSG00000026043		ENSMUSG00000033777		ENSMUSG00000031167		ENSMUSG00000025578	Cbx8
ENSMUSG00000084890		ENSMUSG00000021665		ENSMUSG00000042834		ENSMUSG00000002847	Pla1a
ENSMUSG00000063687		ENSMUSG00000044626		ENSMUSG00000043020		ENSMUSG00000055172	C1ra
ENSMUSG00000076431		ENSMUSG00000050063		ENSMUSG00000064215		ENSMUSG00000113088	Gm36757
ENSMUSG00000096727		ENSMUSG00000020399		ENSMUSG00000075437		ENSMUSG00000049502	Dtx3l
ENSMUSG00000047735		ENSMUSG00000110631		ENSMUSG00000005611		ENSMUSG00000029413	Naaa
ENSMUSG00000076617		ENSMUSG00000027356		ENSMUSG00000014158		ENSMUSG00000033952	Aspm
ENSMUSG00000114479		ENSMUSG00000034486		ENSMUSG00000025479		ENSMUSG00000022488	Nckap1l
ENSMUSG00000038224		ENSMUSG00000074634		ENSMUSG00000063239		ENSMUSG00000066842	Hmcn1
ENSMUSG00000026628		ENSMUSG00000021423		ENSMUSG00000019772		ENSMUSG00000012819	Cdh23
ENSMUSG00000029994		ENSMUSG00000032554		ENSMUSG00000050541		ENSMUSG00000114189	9330199G10Rik
ENSMUSG00000028971		ENSMUSG00000064215		ENSMUSG00000063297		ENSMUSG00000044626	Liph
ENSMUSG00000117254		ENSMUSG00000026347		ENSMUSG00000070436		ENSMUSG00000020649	Rrm2
ENSMUSG00000024397		ENSMUSG00000020649		ENSMUSG00000096107		ENSMUSG00000032323	Cyp11a1
ENSMUSG00000026303		ENSMUSG00000114083		ENSMUSG00000098132		ENSMUSG00000026896	Ifih1
ENSMUSG00000048521		ENSMUSG00000031790		ENSMUSG00000098758		ENSMUSG00000034422	Parp14
ENSMUSG00000053977		ENSMUSG00000104093		ENSMUSG00000021213		ENSMUSG00000070469	Adamtsl3
ENSMUSG00000104674		ENSMUSG00000024501		ENSMUSG00000029661		ENSMUSG00000057337	Chst3
ENSMUSG00000025578		ENSMUSG00000058715		ENSMUSG00000057337		ENSMUSG00000035352	Ccl12
ENSMUSG00000002847		ENSMUSG00000000386		ENSMUSG00000010080		ENSMUSG00000030124	Lag3
ENSMUSG00000004709		ENSMUSG00000069170		ENSMUSG00000022840		ENSMUSG00000064215	Ifi27
ENSMUSG00000024334		ENSMUSG00000078853		ENSMUSG00000023868		ENSMUSG00000004266	Ptpn6
ENSMUSG00000055172		ENSMUSG00000084887		ENSMUSG00000026605		ENSMUSG00000045498	Pcdhb3
ENSMUSG00000113088		ENSMUSG00000021680		ENSMUSG00000033777		ENSMUSG00000104093	A330015K06Rik
ENSMUSG00000049502		ENSMUSG00000023367		ENSMUSG00000048752		ENSMUSG00000032034	Kcnj5
ENSMUSG00000045657		ENSMUSG00000057337		ENSMUSG00000069310		ENSMUSG00000040751	Lat2
ENSMUSG00000029413		ENSMUSG00000059182		ENSMUSG00000091649		ENSMUSG00000025498	Irf7
ENSMUSG00000057346		ENSMUSG00000029168		ENSMUSG00000016918		ENSMUSG00000003283	Hck
ENSMUSG00000033952		ENSMUSG00000027932		ENSMUSG00000025592		ENSMUSG00000035929	H2-Q4
ENSMUSG00000021998		ENSMUSG00000028971		ENSMUSG00000031786		ENSMUSG00000030793	Pycard
ENSMUSG00000022488		ENSMUSG00000059898		ENSMUSG00000032372		ENSMUSG00000024534	Sncaip
ENSMUSG00000066842		ENSMUSG00000041538		ENSMUSG00000050473		ENSMUSG00000031790	Mmp15
ENSMUSG00000012819		ENSMUSG00000048489		ENSMUSG00000059336		ENSMUSG00000026347	Tmem163
ENSMUSG00000023249		ENSMUSG00000002847		ENSMUSG00000010066		ENSMUSG00000050103	Agmo
ENSMUSG00000114189		ENSMUSG00000025578		ENSMUSG00000021423		ENSMUSG00000069310	H3c3
ENSMUSG00000044626		ENSMUSG00000098758		ENSMUSG00000021709		ENSMUSG00000108113	Zim2
ENSMUSG00000106086		ENSMUSG00000027985		ENSMUSG00000057719		ENSMUSG00000027356	Fermt1
ENSMUSG00000020649		ENSMUSG00000024534				ENSMUSG00000069792	Wfdc17
ENSMUSG00000032323		ENSMUSG00000066477				ENSMUSG00000064358	mt-Co3
ENSMUSG00000100832		ENSMUSG00000030124				ENSMUSG00000084887	Gm11749
ENSMUSG00000036908		ENSMUSG00000024300				ENSMUSG00000110631	Gm42047
ENSMUSG00000026896		ENSMUSG00000035929				ENSMUSG00000022817	Itgb5
ENSMUSG00000034422		ENSMUSG00000084890				ENSMUSG00000008540	Mgst1
ENSMUSG00000070469		ENSMUSG00000030796				ENSMUSG00000069267	H3c2
ENSMUSG00000057337		ENSMUSG00000034422				ENSMUSG00000048752	Prss50
ENSMUSG00000015950		ENSMUSG00000037725				ENSMUSG00000009670	Tex11
ENSMUSG00000026480		ENSMUSG00000032323				ENSMUSG00000022146	Osmr
ENSMUSG00000035352		ENSMUSG00000104519				ENSMUSG00000024985	Tcf7l2
ENSMUSG00000030124		ENSMUSG00000030111				ENSMUSG00000029168	Dpysl5
ENSMUSG00000064215		ENSMUSG00000003779				ENSMUSG00000024810	Il33
ENSMUSG00000004266		ENSMUSG00000033208				ENSMUSG00000000982	Ccl3
ENSMUSG00000045498		ENSMUSG00000062760				ENSMUSG00000110649	Gm40466
ENSMUSG00000104093		ENSMUSG00000012819				ENSMUSG00000046718	Bst2
ENSMUSG00000032034		ENSMUSG00000034918				ENSMUSG00000021665	Hexb
ENSMUSG00000040751		ENSMUSG00000026303				ENSMUSG00000039005	Tlr4
ENSMUSG00000117733		ENSMUSG00000103882				ENSMUSG00000022912	Pros1
ENSMUSG00000025498		ENSMUSG00000052776				ENSMUSG00000064246	Chil1
ENSMUSG00000003283		ENSMUSG00000109209				ENSMUSG00000035208	Slfn8
ENSMUSG00000035929		ENSMUSG00000054435				ENSMUSG00000003779	Kif20a
ENSMUSG00000072721		ENSMUSG00000029304				ENSMUSG00000047117	Ankdd1b
ENSMUSG00000030793		ENSMUSG00000028268				ENSMUSG00000100586	Vmn1r90
ENSMUSG00000024534		ENSMUSG00000034923				ENSMUSG00000021680	Crhbp
ENSMUSG00000105562		ENSMUSG00000029994				ENSMUSG00000033208	S100b
ENSMUSG00000073164		ENSMUSG00000021448				ENSMUSG00000069170	Adgrv1
ENSMUSG00000031790		ENSMUSG00000020866				ENSMUSG00000012443	Kif11
ENSMUSG00000092312		ENSMUSG00000086537				ENSMUSG00000114083	Gm47860
ENSMUSG00000026347		ENSMUSG00000026896				ENSMUSG00000035202	Lars2
ENSMUSG00000050103		ENSMUSG00000039005				ENSMUSG00000025355	Mmp19
ENSMUSG00000069310		ENSMUSG00000035208				ENSMUSG00000044827	Tlr1
ENSMUSG00000108113		ENSMUSG00000037411				ENSMUSG00000034486	Gbx2
ENSMUSG00000027356		ENSMUSG00000025355				ENSMUSG00000032369	Plscr1
ENSMUSG00000069792		ENSMUSG00000021097				ENSMUSG00000029490	Mfsd7a
ENSMUSG00000028339		ENSMUSG00000029026				ENSMUSG00000025577	Cbx2
ENSMUSG00000032434		ENSMUSG00000049502				ENSMUSG00000037725	Ckap2
ENSMUSG00000056290		ENSMUSG00000015484				ENSMUSG00000052776	Oas1a
ENSMUSG00000064358		ENSMUSG00000063297				ENSMUSG00000074634	Tmem267
ENSMUSG00000084887		ENSMUSG00000044827				ENSMUSG00000048489	Depp1
ENSMUSG00000110631		ENSMUSG00000036036				ENSMUSG00000028268	Gbp3
ENSMUSG00000022817		ENSMUSG00000039976				ENSMUSG00000024079	Eif2ak2
ENSMUSG00000008540		ENSMUSG00000035202				ENSMUSG00000037411	Serpine1
ENSMUSG00000069267		ENSMUSG00000038007				ENSMUSG00000091649	Phf11b
ENSMUSG00000048752		ENSMUSG00000108218				ENSMUSG00000027985	Lef1
ENSMUSG00000009670		ENSMUSG00000021390				ENSMUSG00000029026	Trp73
ENSMUSG00000022146		ENSMUSG00000089679				ENSMUSG00000040229	Gpr34
ENSMUSG00000024985		ENSMUSG00000029490				ENSMUSG00000032554	Trf
ENSMUSG00000029168		ENSMUSG00000055172				ENSMUSG00000034918	Cdhr2
ENSMUSG00000040296		ENSMUSG00000004266				ENSMUSG00000041538	H2-Ob
ENSMUSG00000024810		ENSMUSG00000040751				ENSMUSG00000066477	Gm16551
ENSMUSG00000000982		ENSMUSG00000110649				ENSMUSG00000098758	7630403G23Rik
ENSMUSG00000059089		ENSMUSG00000028859				ENSMUSG00000000386	Mx1
ENSMUSG00000089797		ENSMUSG00000022912				ENSMUSG00000021448	Shc3
ENSMUSG00000110649		ENSMUSG00000050103				ENSMUSG00000063297	Luzp2
ENSMUSG00000046718		ENSMUSG00000024397				ENSMUSG00000089679	Gm16299
ENSMUSG00000021665		ENSMUSG00000012443				ENSMUSG00000032372	Plscr2
ENSMUSG00000017724		ENSMUSG00000053399				ENSMUSG00000054435	Gimap4
ENSMUSG00000039005		ENSMUSG00000011171				ENSMUSG00000036036	Zfp57
ENSMUSG00000022912		ENSMUSG00000003283				ENSMUSG00000039976	Tbc1d16
ENSMUSG00000064246		ENSMUSG00000027860				ENSMUSG00000075437	Gm11681
ENSMUSG00000024965		ENSMUSG00000022817				ENSMUSG00000015484	Fam163a
ENSMUSG00000035208		ENSMUSG00000038872				ENSMUSG00000015947	Fcgr1
ENSMUSG00000003779		ENSMUSG00000066842				ENSMUSG00000108218	Olfr1372-ps1
ENSMUSG00000047117		ENSMUSG00000035273				ENSMUSG00000086537	Gnasas1
ENSMUSG00000049109		ENSMUSG00000050708				ENSMUSG00000104519	Gm37161
ENSMUSG00000100586		ENSMUSG00000063626				ENSMUSG00000035273	Hpse
ENSMUSG00000021680		ENSMUSG00000005397				ENSMUSG00000063626	Unc5d
ENSMUSG00000030798		ENSMUSG00000075437				ENSMUSG00000053399	Adamts18
ENSMUSG00000033208		ENSMUSG00000022488				ENSMUSG00000109209	Gm45104
ENSMUSG00000069170		ENSMUSG00000028082				ENSMUSG00000030111	A2m
ENSMUSG00000098108		ENSMUSG00000051506				ENSMUSG00000027860	Vangl1
ENSMUSG00000012443		ENSMUSG00000031494				ENSMUSG00000062760	Shisal1
ENSMUSG00000031387		ENSMUSG00000032259				ENSMUSG00000011171	Vipr2
ENSMUSG00000033488		ENSMUSG00000020262				ENSMUSG00000034923	Ly6g6f
ENSMUSG00000114083		ENSMUSG00000029413				ENSMUSG00000038007	Acer2
ENSMUSG00000035202		ENSMUSG00000026475				ENSMUSG00000020262	Adarb1
ENSMUSG00000025355		ENSMUSG00000032369				ENSMUSG00000020866	Cacna1g
ENSMUSG00000044827		ENSMUSG00000032372				ENSMUSG00000103882	Gm37452
ENSMUSG00000032744		ENSMUSG00000030966				ENSMUSG00000021390	Ogn
ENSMUSG00000034486		ENSMUSG00000015947				ENSMUSG00000052305	Hbb-bs
ENSMUSG00000024376		ENSMUSG00000030793				ENSMUSG00000069919	Hba-a1
ENSMUSG00000032369		ENSMUSG00000053175				ENSMUSG00000069917	Hba-a2
ENSMUSG00000027399		ENSMUSG00000025577				ENSMUSG00000050063	Klk6
ENSMUSG00000029490		ENSMUSG00000024079				ENSMUSG00000059898	Dsc3
ENSMUSG00000044518		ENSMUSG00000114442				ENSMUSG00000029304	Spp1
ENSMUSG00000104572		ENSMUSG00000085620				ENSMUSG00000021097	Clmn
ENSMUSG00000055541		ENSMUSG00000047250				ENSMUSG00000028082	Sh3d19
ENSMUSG00000025577		ENSMUSG00000022667				ENSMUSG00000032259	Drd2
ENSMUSG00000037725		ENSMUSG00000040229				ENSMUSG00000026475	Rgs16
ENSMUSG00000052776		ENSMUSG00000059336				ENSMUSG00000059336	Slc14a1
ENSMUSG00000079057		ENSMUSG00000073940				ENSMUSG00000073940	Hbb-bt
ENSMUSG00000028640		ENSMUSG00000046718
ENSMUSG00000074634		ENSMUSG00000008540
ENSMUSG00000028270		ENSMUSG00000064246
ENSMUSG00000048489
ENSMUSG00000028268
ENSMUSG00000024079
ENSMUSG00000055413
ENSMUSG00000037411
ENSMUSG00000113320
ENSMUSG00000007041
ENSMUSG00000032089
ENSMUSG00000091649
ENSMUSG00000106734
ENSMUSG00000004609
ENSMUSG00000027985
ENSMUSG00000029090
ENSMUSG00000036560
ENSMUSG00000029026
ENSMUSG00000087700
ENSMUSG00000009185
ENSMUSG00000043613
ENSMUSG00000040229
ENSMUSG00000002985
ENSMUSG00000114822
ENSMUSG00000084350
ENSMUSG00000032554
ENSMUSG00000022575
ENSMUSG00000034918
ENSMUSG00000041538
ENSMUSG00000068246
ENSMUSG00000029343
ENSMUSG00000100837
ENSMUSG00000020467
ENSMUSG00000066477
ENSMUSG00000000673
ENSMUSG00000028976
ENSMUSG00000026928
ENSMUSG00000098758
ENSMUSG00000022906
ENSMUSG00000000386
ENSMUSG00000022901
ENSMUSG00000027329
ENSMUSG00000071713
ENSMUSG00000056144
ENSMUSG00000021448
ENSMUSG00000048865
ENSMUSG00000028874
ENSMUSG00000063297
ENSMUSG00000071178
ENSMUSG00000053318
ENSMUSG00000089679
ENSMUSG00000105096
ENSMUSG00000100009
ENSMUSG00000032372
ENSMUSG00000054435
ENSMUSG00000025877
ENSMUSG00000036036
ENSMUSG00000039976
ENSMUSG00000075437
ENSMUSG00000015484
ENSMUSG00000015947
ENSMUSG00000021876
ENSMUSG00000028970
ENSMUSG00000044350
ENSMUSG00000108218
ENSMUSG00000086537
ENSMUSG00000104519
ENSMUSG00000035273
ENSMUSG00000063626
ENSMUSG00000020097
ENSMUSG00000026922
ENSMUSG00000042228
ENSMUSG00000053399
ENSMUSG00000074001
ENSMUSG00000109209
ENSMUSG00000112023
ENSMUSG00000030111
ENSMUSG00000046688
ENSMUSG00000061991
ENSMUSG00000027860
ENSMUSG00000001665
ENSMUSG00000031647
ENSMUSG00000035004
ENSMUSG00000058773
ENSMUSG00000019942
ENSMUSG00000062760
ENSMUSG00000078942
ENSMUSG00000024978
ENSMUSG00000058498
ENSMUSG00000011171
ENSMUSG00000052912
ENSMUSG00000031877
ENSMUSG00000078920
ENSMUSG00000041736
ENSMUSG00000032231
ENSMUSG00000106220
ENSMUSG00000000562
ENSMUSG00000100313
ENSMUSG00000034923
ENSMUSG00000038007
ENSMUSG00000063446
ENSMUSG00000044583
ENSMUSG00000029096
ENSMUSG00000029162
ENSMUSG00000065987
ENSMUSG00000020262
ENSMUSG00000024621
ENSMUSG00000024679
ENSMUSG00000097929
ENSMUSG00000026104
ENSMUSG00000020866
ENSMUSG00000103882
ENSMUSG00000029915
ENSMUSG00000063458
ENSMUSG00000078502
ENSMUSG00000020573
ENSMUSG00000022221
ENSMUSG00000024696
ENSMUSG00000021390
ENSMUSG00000027514
ENSMUSG00000034520
ENSMUSG00000031283
ENSMUSG00000071847
ENSMUSG00000113186
ENSMUSG00000048540
ENSMUSG00000034906
ENSMUSG00000062545
ENSMUSG00000113330
ENSMUSG00000024737
ENSMUSG00000053044
ENSMUSG00000052133
ENSMUSG00000061186
ENSMUSG00000074578
ENSMUSG00000035697
ENSMUSG00000089773
ENSMUSG00000038843
ENSMUSG00000092216
ENSMUSG00000084234

## Sheet: CB YvM
DESeq2		edgeR		Cuffdiff		Consensus	Name
ENSMUSG00000052276		ENSMUSG00000052276		ENSMUSG00000000214		ENSMUSG00000052276	Ostn
ENSMUSG00000034459		ENSMUSG00000034459		ENSMUSG00000000263		ENSMUSG00000034459	Ifit1
ENSMUSG00000041828		ENSMUSG00000062488		ENSMUSG00000001506		ENSMUSG00000041828	Abca8a
ENSMUSG00000062488		ENSMUSG00000073418		ENSMUSG00000002341		ENSMUSG00000062488	Ifit3b
ENSMUSG00000029826		ENSMUSG00000038642		ENSMUSG00000004655		ENSMUSG00000029826	Zc3hav1
ENSMUSG00000063564		ENSMUSG00000074896		ENSMUSG00000005397		ENSMUSG00000063564	Col23a1
ENSMUSG00000046879		ENSMUSG00000041828		ENSMUSG00000019232		ENSMUSG00000046879	Irgm1
ENSMUSG00000073418		ENSMUSG00000029826		ENSMUSG00000019874		ENSMUSG00000073418	C4b
ENSMUSG00000022176		ENSMUSG00000046879		ENSMUSG00000020048		ENSMUSG00000022176	Rem2
ENSMUSG00000038642		ENSMUSG00000025889		ENSMUSG00000021250		ENSMUSG00000038642	Ctss
ENSMUSG00000036036		ENSMUSG00000115529		ENSMUSG00000022176		ENSMUSG00000036036	Zfp57
ENSMUSG00000074896		ENSMUSG00000031618		ENSMUSG00000022206		ENSMUSG00000074896	Ifit3
ENSMUSG00000031618		ENSMUSG00000036036		ENSMUSG00000022425		ENSMUSG00000031618	Nr3c2
ENSMUSG00000115529		ENSMUSG00000001506		ENSMUSG00000023034		ENSMUSG00000115529	9630013A20Rik
ENSMUSG00000023992		ENSMUSG00000028364		ENSMUSG00000023043		ENSMUSG00000023992	Trem2
ENSMUSG00000025889		ENSMUSG00000029561		ENSMUSG00000023992		ENSMUSG00000025889	Snca
ENSMUSG00000026896		ENSMUSG00000022176		ENSMUSG00000024331		ENSMUSG00000026896	Ifih1
ENSMUSG00000029561		ENSMUSG00000079293		ENSMUSG00000024339		ENSMUSG00000029561	Oasl2
ENSMUSG00000062296		ENSMUSG00000062296		ENSMUSG00000025083		ENSMUSG00000062296	Trank1
ENSMUSG00000040253		ENSMUSG00000073489		ENSMUSG00000025823		ENSMUSG00000040253	Gbp7
ENSMUSG00000046805		ENSMUSG00000057596		ENSMUSG00000025889		ENSMUSG00000046805	Mpeg1
ENSMUSG00000045932		ENSMUSG00000045932		ENSMUSG00000026051		ENSMUSG00000045932	Ifit2
ENSMUSG00000023224		ENSMUSG00000023992		ENSMUSG00000026579		ENSMUSG00000023224	Serping1
ENSMUSG00000022656		ENSMUSG00000063564		ENSMUSG00000026822		ENSMUSG00000022656	Nectin3
ENSMUSG00000057596		ENSMUSG00000060802		ENSMUSG00000027270		ENSMUSG00000057596	Trim30d
ENSMUSG00000073489		ENSMUSG00000030107		ENSMUSG00000028150		ENSMUSG00000073489	Ifi204
ENSMUSG00000079293		ENSMUSG00000056296		ENSMUSG00000028364		ENSMUSG00000079293	Clec7a
ENSMUSG00000028364		ENSMUSG00000070327		ENSMUSG00000028755		ENSMUSG00000028364	Tnc
ENSMUSG00000005803		ENSMUSG00000024331		ENSMUSG00000029135		ENSMUSG00000005803	Sqor
ENSMUSG00000005397		ENSMUSG00000098973		ENSMUSG00000029561		ENSMUSG00000005397	Nid1
ENSMUSG00000022906		ENSMUSG00000046805		ENSMUSG00000029657		ENSMUSG00000022906	Parp9
ENSMUSG00000046718		ENSMUSG00000046764		ENSMUSG00000029826		ENSMUSG00000046718	Bst2
ENSMUSG00000030107		ENSMUSG00000105096		ENSMUSG00000029843		ENSMUSG00000030107	Usp18
ENSMUSG00000026355		ENSMUSG00000054509		ENSMUSG00000030107		ENSMUSG00000026355	Mcm6
ENSMUSG00000028755		ENSMUSG00000119584		ENSMUSG00000030579		ENSMUSG00000028755	Cda
ENSMUSG00000056296		ENSMUSG00000028755		ENSMUSG00000030921		ENSMUSG00000056296	Synpr
ENSMUSG00000078853		ENSMUSG00000046718		ENSMUSG00000031618		ENSMUSG00000078853	Igtp
ENSMUSG00000040296		ENSMUSG00000033880		ENSMUSG00000032060		ENSMUSG00000040296	Ddx58
ENSMUSG00000054509		ENSMUSG00000064215		ENSMUSG00000032373		ENSMUSG00000054509	Parp4
ENSMUSG00000051486		ENSMUSG00000025498		ENSMUSG00000032446		ENSMUSG00000051486	Pcdhb11
ENSMUSG00000113252		ENSMUSG00000029605		ENSMUSG00000032854		ENSMUSG00000113252	Gm33489
ENSMUSG00000070348		ENSMUSG00000026896		ENSMUSG00000033880		ENSMUSG00000070348	Ccnd1
ENSMUSG00000049107		ENSMUSG00000040296		ENSMUSG00000034459		ENSMUSG00000049107	Ntf3
ENSMUSG00000025498		ENSMUSG00000006522		ENSMUSG00000034460		ENSMUSG00000025498	Irf7
ENSMUSG00000031849		ENSMUSG00000078853		ENSMUSG00000035208		ENSMUSG00000031849	Comp
ENSMUSG00000028150		ENSMUSG00000022656		ENSMUSG00000035274		ENSMUSG00000028150	Rorc
ENSMUSG00000033880		ENSMUSG00000031849		ENSMUSG00000036169		ENSMUSG00000033880	Lgals3bp
ENSMUSG00000024331		ENSMUSG00000041062		ENSMUSG00000036887		ENSMUSG00000024331	Dsc2
ENSMUSG00000097929		ENSMUSG00000028150		ENSMUSG00000036896		ENSMUSG00000097929	Tunar
ENSMUSG00000016496		ENSMUSG00000089679		ENSMUSG00000036905		ENSMUSG00000016496	Cd274
ENSMUSG00000024339		ENSMUSG00000049107		ENSMUSG00000037416		ENSMUSG00000024339	Tap2
ENSMUSG00000019820		ENSMUSG00000104713		ENSMUSG00000037625		ENSMUSG00000019820	Utrn
ENSMUSG00000064215		ENSMUSG00000096929		ENSMUSG00000038642		ENSMUSG00000064215	Ifi27
ENSMUSG00000092083		ENSMUSG00000031504		ENSMUSG00000039323		ENSMUSG00000092083	Kcnb2
ENSMUSG00000044042		ENSMUSG00000021665		ENSMUSG00000039672		ENSMUSG00000044042	Fmn1
ENSMUSG00000060802		ENSMUSG00000075020		ENSMUSG00000039728		ENSMUSG00000060802	B2m
ENSMUSG00000070527		ENSMUSG00000005397		ENSMUSG00000040296		ENSMUSG00000070527	Mkrn3
ENSMUSG00000060519		ENSMUSG00000023224		ENSMUSG00000041062		ENSMUSG00000060519	Tor3a
ENSMUSG00000020467		ENSMUSG00000070527		ENSMUSG00000041773		ENSMUSG00000020467	Efemp1
ENSMUSG00000089679		ENSMUSG00000022906		ENSMUSG00000041828		ENSMUSG00000089679	Gm16299
ENSMUSG00000103800		ENSMUSG00000070348		ENSMUSG00000042644		ENSMUSG00000103800	Pcdha8
ENSMUSG00000070327		ENSMUSG00000097929		ENSMUSG00000042834		ENSMUSG00000070327	Rnf213
ENSMUSG00000001506		ENSMUSG00000079017		ENSMUSG00000045932		ENSMUSG00000001506	Col1a1
ENSMUSG00000000290		ENSMUSG00000092083		ENSMUSG00000046718		ENSMUSG00000000290	Itgb2
ENSMUSG00000104713		ENSMUSG00000036887		ENSMUSG00000046805		ENSMUSG00000104713	Gbp6
ENSMUSG00000072762		ENSMUSG00000042834		ENSMUSG00000046879		ENSMUSG00000072762	4930522L14Rik
ENSMUSG00000073590		ENSMUSG00000019232		ENSMUSG00000047230		ENSMUSG00000073590	3222401L13Rik
ENSMUSG00000041062		ENSMUSG00000104346		ENSMUSG00000048304		ENSMUSG00000041062	Mslnl
ENSMUSG00000105096		ENSMUSG00000004707		ENSMUSG00000049107		ENSMUSG00000105096	Gbp10
ENSMUSG00000103677		ENSMUSG00000040253		ENSMUSG00000052229		ENSMUSG00000103677	Pcdhga4
ENSMUSG00000029605		ENSMUSG00000035208		ENSMUSG00000052276		ENSMUSG00000029605	Oas1b
ENSMUSG00000006522		ENSMUSG00000005803		ENSMUSG00000052397		ENSMUSG00000006522	Itih3
ENSMUSG00000028268		ENSMUSG00000051486		ENSMUSG00000054509		ENSMUSG00000028268	Gbp3
ENSMUSG00000021665		ENSMUSG00000016496		ENSMUSG00000055866		ENSMUSG00000021665	Hexb
ENSMUSG00000025888		ENSMUSG00000026822		ENSMUSG00000056144		ENSMUSG00000025888	Casp1
ENSMUSG00000035208		ENSMUSG00000052229		ENSMUSG00000056174		ENSMUSG00000035208	Slfn8
ENSMUSG00000075020		ENSMUSG00000044042		ENSMUSG00000056296		ENSMUSG00000075020	Mir670hg
ENSMUSG00000078945		ENSMUSG00000073590		ENSMUSG00000056999		ENSMUSG00000078945	Naip2
ENSMUSG00000036896		ENSMUSG00000061232		ENSMUSG00000057596		ENSMUSG00000036896	C1qc
ENSMUSG00000052336		ENSMUSG00000024339		ENSMUSG00000058488		ENSMUSG00000052336	Cx3cr1
ENSMUSG00000000560		ENSMUSG00000036896		ENSMUSG00000059456		ENSMUSG00000000560	Gabra2
ENSMUSG00000002108		ENSMUSG00000063972		ENSMUSG00000059970		ENSMUSG00000002108	Nr1h3
ENSMUSG00000020143		ENSMUSG00000028268		ENSMUSG00000060802		ENSMUSG00000020143	Dock2
ENSMUSG00000042834		ENSMUSG00000113252		ENSMUSG00000061808		ENSMUSG00000042834	Nrep
ENSMUSG00000046764		ENSMUSG00000044043		ENSMUSG00000062488		ENSMUSG00000046764	A530053G22Rik
ENSMUSG00000079017		ENSMUSG00000025888		ENSMUSG00000063564		ENSMUSG00000079017	Ifi27l2a
ENSMUSG00000096929		ENSMUSG00000078945		ENSMUSG00000064215		ENSMUSG00000096929	A330023F24Rik
ENSMUSG00000028360		ENSMUSG00000042644		ENSMUSG00000064345		ENSMUSG00000028360	Slc44a5
ENSMUSG00000036565		ENSMUSG00000030921		ENSMUSG00000067996		ENSMUSG00000036565	Ttyh3
ENSMUSG00000066258		ENSMUSG00000059970		ENSMUSG00000067998		ENSMUSG00000066258	Trim12a
ENSMUSG00000000275		ENSMUSG00000103800		ENSMUSG00000068196		ENSMUSG00000000275	Trim25
ENSMUSG00000027489		ENSMUSG00000000290		ENSMUSG00000069516		ENSMUSG00000027489	Necab3
ENSMUSG00000039989		ENSMUSG00000103677		ENSMUSG00000070327		ENSMUSG00000039989	Cbx4
ENSMUSG00000061232		ENSMUSG00000020467		ENSMUSG00000073418		ENSMUSG00000061232	H2-K1
ENSMUSG00000104346		ENSMUSG00000031636		ENSMUSG00000073565		ENSMUSG00000104346	Pcdhga3
ENSMUSG00000030921		ENSMUSG00000027489		ENSMUSG00000074896		ENSMUSG00000030921	Trim30a
ENSMUSG00000036887		ENSMUSG00000060519		ENSMUSG00000075020		ENSMUSG00000036887	C1qa
ENSMUSG00000059970		ENSMUSG00000074151		ENSMUSG00000078853		ENSMUSG00000059970	Hspa2
ENSMUSG00000003282		ENSMUSG00000004110		ENSMUSG00000079017		ENSMUSG00000108168	Gm43864
ENSMUSG00000108168		ENSMUSG00000047117		ENSMUSG00000092035		ENSMUSG00000052229	Gpr17
ENSMUSG00000052229		ENSMUSG00000032436		ENSMUSG00000097929		ENSMUSG00000042532	Golga7b
ENSMUSG00000042532		ENSMUSG00000000386		ENSMUSG00000098973		ENSMUSG00000032415	Ube2cbp
ENSMUSG00000032415		ENSMUSG00000038507		ENSMUSG00000104713		ENSMUSG00000063972	Nr6a1
ENSMUSG00000063972		ENSMUSG00000052397		ENSMUSG00000118642		ENSMUSG00000044043	Pcdhb14
ENSMUSG00000044043		ENSMUSG00000056144		ENSMUSG00000119584		ENSMUSG00000026090	Cracdl
ENSMUSG00000026090		ENSMUSG00000108168		ENSMUSG00000000682		ENSMUSG00000027009	Itga4
ENSMUSG00000027009		ENSMUSG00000026090		ENSMUSG00000016496		ENSMUSG00000026315	Serpinb8
ENSMUSG00000026315		ENSMUSG00000042532		ENSMUSG00000019929		ENSMUSG00000032436	Cmtm7
ENSMUSG00000030789		ENSMUSG00000010461		ENSMUSG00000025887		ENSMUSG00000108825	Gm45838
ENSMUSG00000032436		ENSMUSG00000026315		ENSMUSG00000026896		ENSMUSG00000031504	Rab20
ENSMUSG00000108825		ENSMUSG00000050556		ENSMUSG00000031504		ENSMUSG00000030579	Tyrobp
ENSMUSG00000031504		ENSMUSG00000052336		ENSMUSG00000037086		ENSMUSG00000039903	Eva1c
ENSMUSG00000030579		ENSMUSG00000026355		ENSMUSG00000039457		ENSMUSG00000031170	Slc38a5
ENSMUSG00000039903		ENSMUSG00000031170		ENSMUSG00000040253		ENSMUSG00000031636	Pdlim3
ENSMUSG00000031170		ENSMUSG00000079434		ENSMUSG00000041120		ENSMUSG00000051242	Pcdhb9
ENSMUSG00000031636		ENSMUSG00000000560		ENSMUSG00000045903		ENSMUSG00000025887	Casp12
ENSMUSG00000051242		ENSMUSG00000024338		ENSMUSG00000048108		ENSMUSG00000047735	Samd9l
ENSMUSG00000025887		ENSMUSG00000028360		ENSMUSG00000051111		ENSMUSG00000074151	Nlrc5
ENSMUSG00000047735		ENSMUSG00000117465		ENSMUSG00000068220		ENSMUSG00000058715	Fcer1g
ENSMUSG00000074151		ENSMUSG00000071341		ENSMUSG00000073489		ENSMUSG00000004707	Ly9
ENSMUSG00000058715		ENSMUSG00000007877		ENSMUSG00000000290		ENSMUSG00000032714	Syde1
ENSMUSG00000004707		ENSMUSG00000020143		ENSMUSG00000005268		ENSMUSG00000049502	Dtx3l
ENSMUSG00000032714		ENSMUSG00000066258		ENSMUSG00000020681		ENSMUSG00000034422	Parp14
ENSMUSG00000049502		ENSMUSG00000056999		ENSMUSG00000028145		ENSMUSG00000056144	Trim34a
ENSMUSG00000034422		ENSMUSG00000025887		ENSMUSG00000032415		ENSMUSG00000051029	Serpinb1b
ENSMUSG00000056144		ENSMUSG00000073902		ENSMUSG00000039114		ENSMUSG00000068220	Lgals1
ENSMUSG00000051029		ENSMUSG00000035202		ENSMUSG00000046764		ENSMUSG00000010461	Eya4
ENSMUSG00000068220		ENSMUSG00000030579		ENSMUSG00000059854		ENSMUSG00000024338	Psmb8
ENSMUSG00000010461		ENSMUSG00000037428		ENSMUSG00000062296		ENSMUSG00000073902	Gvin3
ENSMUSG00000024338		ENSMUSG00000023905		ENSMUSG00000092090		ENSMUSG00000038507	Parp12
ENSMUSG00000073902		ENSMUSG00000103088		ENSMUSG00000117465		ENSMUSG00000037428	Vgf
ENSMUSG00000038507		ENSMUSG00000019820		ENSMUSG00000020467		ENSMUSG00000019232	Etnppl
ENSMUSG00000037428		ENSMUSG00000108218		ENSMUSG00000023067		ENSMUSG00000023905	Tnfrsf12a
ENSMUSG00000019232		ENSMUSG00000072762		ENSMUSG00000030218		ENSMUSG00000027188	Pamr1
ENSMUSG00000023905		ENSMUSG00000069793		ENSMUSG00000038507		ENSMUSG00000036908	Unc93b1
ENSMUSG00000027188		ENSMUSG00000029661		ENSMUSG00000046402		ENSMUSG00000079434	Neu2
ENSMUSG00000036908		ENSMUSG00000064294		ENSMUSG00000055235		ENSMUSG00000026043	Col3a1
ENSMUSG00000056328		ENSMUSG00000024079		ENSMUSG00000070348		ENSMUSG00000110649	Gm40466
ENSMUSG00000079434		ENSMUSG00000036565		ENSMUSG00000004460		ENSMUSG00000037921	Ddx60
ENSMUSG00000026043		ENSMUSG00000032415		ENSMUSG00000010461		ENSMUSG00000004110	Cacna1e
ENSMUSG00000110649		ENSMUSG00000037921		ENSMUSG00000023224		ENSMUSG00000117465	Gm49980
ENSMUSG00000037921		ENSMUSG00000064380		ENSMUSG00000026043		ENSMUSG00000044674	Fzd1
ENSMUSG00000004110		ENSMUSG00000047735		ENSMUSG00000027489		ENSMUSG00000020641	Rsad2
ENSMUSG00000117465		ENSMUSG00000039989		ENSMUSG00000030376		ENSMUSG00000007877	Tcap
ENSMUSG00000044674		ENSMUSG00000077167		ENSMUSG00000031762		ENSMUSG00000024079	Eif2ak2
ENSMUSG00000020641		ENSMUSG00000064267		ENSMUSG00000038843		ENSMUSG00000042644	Itpr3
ENSMUSG00000007877		ENSMUSG00000073555		ENSMUSG00000039385		ENSMUSG00000064294	Aox3
ENSMUSG00000024579		ENSMUSG00000025150		ENSMUSG00000044468		ENSMUSG00000031502	Col4a1
ENSMUSG00000063286		ENSMUSG00000034422		ENSMUSG00000047735		ENSMUSG00000050556	Kcnb1
ENSMUSG00000024079		ENSMUSG00000000275		ENSMUSG00000058626		ENSMUSG00000098973	Mir6236
ENSMUSG00000115263		ENSMUSG00000034460		ENSMUSG00000078945		ENSMUSG00000039457	Ppl
ENSMUSG00000042644		ENSMUSG00000051242		ENSMUSG00000079293		ENSMUSG00000073565	Prr16
ENSMUSG00000064294		ENSMUSG00000035929		ENSMUSG00002076601		ENSMUSG00000035606	Ky
ENSMUSG00000031502		ENSMUSG00000039903		ENSMUSG00000022512		ENSMUSG00000043943	Naalad2
ENSMUSG00000050556		ENSMUSG00000026043		ENSMUSG00000027375		ENSMUSG00000035929	H2-Q4
ENSMUSG00000098973		ENSMUSG00000068220		ENSMUSG00000046719		ENSMUSG00000034460	Six4
ENSMUSG00000039457		ENSMUSG00000039457		ENSMUSG00000064387		ENSMUSG00000039997	Ifi203
ENSMUSG00000073565		ENSMUSG00000031502		ENSMUSG00000029311		ENSMUSG00000103037	Pcdhgb1
ENSMUSG00000035606		ENSMUSG00000073565		ENSMUSG00000029605		ENSMUSG00000029661	Col1a2
ENSMUSG00000043943		ENSMUSG00000032714		ENSMUSG00000029661		ENSMUSG00000064380	Gm26448
ENSMUSG00000035929		ENSMUSG00000051029		ENSMUSG00000032714		ENSMUSG00000103088	Pcdhgb6
ENSMUSG00000079084		ENSMUSG00000103037		ENSMUSG00000051029		ENSMUSG00000052397	Ezr
ENSMUSG00000034460		ENSMUSG00000036905		ENSMUSG00000092083		ENSMUSG00000047117	Ankdd1b
ENSMUSG00000039997		ENSMUSG00000073411		ENSMUSG00000095041		ENSMUSG00000059854	Hydin
ENSMUSG00000103037		ENSMUSG00000059456		ENSMUSG00000115068		ENSMUSG00000036905	C1qb
ENSMUSG00000029661		ENSMUSG00000020641		ENSMUSG00000007877		ENSMUSG00000025912	Mybl1
ENSMUSG00000064380		ENSMUSG00000059854		ENSMUSG00000025888		ENSMUSG00000064267	Hvcn1
ENSMUSG00000103088		ENSMUSG00000000682		ENSMUSG00000035929		ENSMUSG00000000386	Mx1
ENSMUSG00000052397		ENSMUSG00000030674		ENSMUSG00000037428		ENSMUSG00000030674	Qprt
ENSMUSG00000047117		ENSMUSG00000058715		ENSMUSG00000042532		ENSMUSG00000011256	Adam19
ENSMUSG00000059854		ENSMUSG00000079547		ENSMUSG00000064325		ENSMUSG00000108218	Olfr1372-ps1
ENSMUSG00000036905		ENSMUSG00000030798		ENSMUSG00000113252		ENSMUSG00000028145	Them4
ENSMUSG00000026946		ENSMUSG00000086587		ENSMUSG00000039676		ENSMUSG00000018819	Lsp1
ENSMUSG00000025912		ENSMUSG00000110649		ENSMUSG00000048482		ENSMUSG00000071341	Egr4
ENSMUSG00000041046		ENSMUSG00000036814		ENSMUSG00002076896		ENSMUSG00000022895	Ets2
ENSMUSG00000064267		ENSMUSG00000114479				ENSMUSG00000038147	Cd84
ENSMUSG00000000386		ENSMUSG00000108825				ENSMUSG00000035202	Lars2
ENSMUSG00000030674		ENSMUSG00000086324				ENSMUSG00000073411	H2-D1
ENSMUSG00000052974		ENSMUSG00000037086				ENSMUSG00000119584	Rn18s-rs5
ENSMUSG00000058070		ENSMUSG00000052776				ENSMUSG00000026822	Lcn2
ENSMUSG00000011256		ENSMUSG00000002108				ENSMUSG00000056031	9330154J02Rik
ENSMUSG00000108218		ENSMUSG00000033355				ENSMUSG00000036814	Slc6a20a
ENSMUSG00000028145		ENSMUSG00000022895				ENSMUSG00000069793	Slfn9
ENSMUSG00000006611		ENSMUSG00000065353				ENSMUSG00000069516	Lyz2
ENSMUSG00000018819		ENSMUSG00000025912				ENSMUSG00000033355	Rtp4
ENSMUSG00000047867		ENSMUSG00000056031				ENSMUSG00000059456	Ptk2b
ENSMUSG00000071341		ENSMUSG00000064023				ENSMUSG00000077167	Gm24119
ENSMUSG00000072763		ENSMUSG00000027009				ENSMUSG00000073555	Gm4951
ENSMUSG00000026395		ENSMUSG00000069516				ENSMUSG00000056999	Ide
ENSMUSG00000017418		ENSMUSG00000028145				ENSMUSG00000016206	H2-M3
ENSMUSG00000019055		ENSMUSG00000040170				ENSMUSG00000046719	Nxph3
ENSMUSG00000109517		ENSMUSG00000051111				ENSMUSG00000046186	Cd109
ENSMUSG00000004730		ENSMUSG00000039997				ENSMUSG00000052776	Oas1a
ENSMUSG00000022895		ENSMUSG00000032854				ENSMUSG00000040170	Fmo2
ENSMUSG00000023232		ENSMUSG00000118642				ENSMUSG00000000682	Cd52
ENSMUSG00000038147		ENSMUSG00000035606				ENSMUSG00000025150	Cbr2
ENSMUSG00000022831		ENSMUSG00000036908				ENSMUSG00000041120	Nbl1
ENSMUSG00000035202		ENSMUSG00000117671				ENSMUSG00000030798	Cd37
ENSMUSG00000059149		ENSMUSG00000046186				ENSMUSG00000079547	H2-DMb1
ENSMUSG00000006411		ENSMUSG00000011256				ENSMUSG00000086587	Gm11837
ENSMUSG00000073411		ENSMUSG00000018819				ENSMUSG00000018381	Abi3
ENSMUSG00000119584		ENSMUSG00000016206				ENSMUSG00000069893	9930111J21Rik1
ENSMUSG00000044921		ENSMUSG00000041120				ENSMUSG00000048304	Slitrk3
ENSMUSG00000026822		ENSMUSG00000037625				ENSMUSG00000086324	Gm15564
ENSMUSG00000056031		ENSMUSG00000049502				ENSMUSG00000114479	Gm49375
ENSMUSG00000036814		ENSMUSG00000018381				ENSMUSG00000037086	Prr32
ENSMUSG00000026285		ENSMUSG00000044674				ENSMUSG00000051111	Sv2c
ENSMUSG00000069793		ENSMUSG00000027188				ENSMUSG00000032854	Ugt8a
ENSMUSG00000069516		ENSMUSG00000043943				ENSMUSG00000118642	AY036118
ENSMUSG00000025578		ENSMUSG00000002341				ENSMUSG00000037625	Cldn11
ENSMUSG00000033355		ENSMUSG00000069893				ENSMUSG00000002341	Ncan
ENSMUSG00000063434		ENSMUSG00000038147
ENSMUSG00000103770
ENSMUSG00000059456
ENSMUSG00000032232
ENSMUSG00000045502
ENSMUSG00000049097
ENSMUSG00000077167
ENSMUSG00000025533
ENSMUSG00000039851
ENSMUSG00000040310
ENSMUSG00000073555
ENSMUSG00000104157
ENSMUSG00000056999
ENSMUSG00000056737
ENSMUSG00000022488
ENSMUSG00000016206
ENSMUSG00000029298
ENSMUSG00000030319
ENSMUSG00000050335
ENSMUSG00000085379
ENSMUSG00000046719
ENSMUSG00000046186
ENSMUSG00000028581
ENSMUSG00000042246
ENSMUSG00000052776
ENSMUSG00000040170
ENSMUSG00000070637
ENSMUSG00000036353
ENSMUSG00000029798
ENSMUSG00000001281
ENSMUSG00000054675
ENSMUSG00000057003
ENSMUSG00000046152
ENSMUSG00000000682
ENSMUSG00000025150
ENSMUSG00000041120
ENSMUSG00000015134
ENSMUSG00000024308
ENSMUSG00000038844
ENSMUSG00000040675
ENSMUSG00000004266
ENSMUSG00000051236
ENSMUSG00000067212
ENSMUSG00000091183
ENSMUSG00000056692
ENSMUSG00000018899
ENSMUSG00000020990
ENSMUSG00000030798
ENSMUSG00000033658
ENSMUSG00000041180
ENSMUSG00000015852
ENSMUSG00000049872
ENSMUSG00000079547
ENSMUSG00000016256
ENSMUSG00000086587
ENSMUSG00000039959
ENSMUSG00000054640
ENSMUSG00000021775
ENSMUSG00000025104
ENSMUSG00000026956
ENSMUSG00000095990
ENSMUSG00000097330
ENSMUSG00000018381
ENSMUSG00000044518
ENSMUSG00000033207
ENSMUSG00000034115
ENSMUSG00000027227
ENSMUSG00000044499
ENSMUSG00000057337
ENSMUSG00000104318
ENSMUSG00000002325
ENSMUSG00000069893
ENSMUSG00000002980
ENSMUSG00000048304
ENSMUSG00000001768
ENSMUSG00000039234
ENSMUSG00000015340
ENSMUSG00000086324
ENSMUSG00000034000
ENSMUSG00000033579
ENSMUSG00000030577
ENSMUSG00000040229
ENSMUSG00000020814
ENSMUSG00000022817
ENSMUSG00000113701
ENSMUSG00000086290
ENSMUSG00000048424
ENSMUSG00000052160
ENSMUSG00000114479
ENSMUSG00000020937
ENSMUSG00000036306
ENSMUSG00000016262
ENSMUSG00000037086
ENSMUSG00000045318
ENSMUSG00000078607
ENSMUSG00000024642
ENSMUSG00000059887
ENSMUSG00000022490
ENSMUSG00000036362
ENSMUSG00000104240
ENSMUSG00000029455

## Sheet: CB YvO
DESeq2		edgeR		Cuffdiff		Consensus	Name
ENSMUSG00000073418		ENSMUSG00000073418		ENSMUSG00000000214		ENSMUSG00000073418	C4b
ENSMUSG00000079293		ENSMUSG00000079293		ENSMUSG00000000263		ENSMUSG00000079293	Clec7a
ENSMUSG00000046805		ENSMUSG00000038642		ENSMUSG00000000275		ENSMUSG00000046805	Mpeg1
ENSMUSG00000038642		ENSMUSG00000046805		ENSMUSG00000000290		ENSMUSG00000038642	Ctss
ENSMUSG00000029816		ENSMUSG00000069516		ENSMUSG00000000560		ENSMUSG00000029816	Gpnmb
ENSMUSG00000023992		ENSMUSG00000030789		ENSMUSG00000000682		ENSMUSG00000023992	Trem2
ENSMUSG00000069516		ENSMUSG00000029816		ENSMUSG00000000982		ENSMUSG00000069516	Lyz2
ENSMUSG00000050335		ENSMUSG00000064215		ENSMUSG00000001506		ENSMUSG00000050335	Lgals3
ENSMUSG00000056999		ENSMUSG00000033880		ENSMUSG00000002325		ENSMUSG00000056999	Ide
ENSMUSG00000064215		ENSMUSG00000056999		ENSMUSG00000002341		ENSMUSG00000064215	Ifi27
ENSMUSG00000036896		ENSMUSG00000036887		ENSMUSG00000002602		ENSMUSG00000036896	C1qc
ENSMUSG00000057596		ENSMUSG00000029826		ENSMUSG00000002985		ENSMUSG00000057596	Trim30d
ENSMUSG00000015340		ENSMUSG00000050335		ENSMUSG00000003282		ENSMUSG00000015340	Cybb
ENSMUSG00000029826		ENSMUSG00000036896		ENSMUSG00000003418		ENSMUSG00000029826	Zc3hav1
ENSMUSG00000033880		ENSMUSG00000029561		ENSMUSG00000004110		ENSMUSG00000033880	Lgals3bp
ENSMUSG00000030789		ENSMUSG00000023992		ENSMUSG00000004266		ENSMUSG00000030789	Itgax
ENSMUSG00000029561		ENSMUSG00000049723		ENSMUSG00000004707		ENSMUSG00000029561	Oasl2
ENSMUSG00000036887		ENSMUSG00000068129		ENSMUSG00000004730		ENSMUSG00000036887	C1qa
ENSMUSG00000030579		ENSMUSG00000060802		ENSMUSG00000005397		ENSMUSG00000030579	Tyrobp
ENSMUSG00000046879		ENSMUSG00000046879		ENSMUSG00000005803		ENSMUSG00000046879	Irgm1
ENSMUSG00000052276		ENSMUSG00000074896		ENSMUSG00000006519		ENSMUSG00000052276	Ostn
ENSMUSG00000000290		ENSMUSG00000015340		ENSMUSG00000006522		ENSMUSG00000000290	Itgb2
ENSMUSG00000035208		ENSMUSG00000062488		ENSMUSG00000007613		ENSMUSG00000035208	Slfn8
ENSMUSG00000036905		ENSMUSG00000034459		ENSMUSG00000007891		ENSMUSG00000036905	C1qb
ENSMUSG00000026395		ENSMUSG00000052276		ENSMUSG00000009216		ENSMUSG00000026395	Ptprc
ENSMUSG00000038147		ENSMUSG00000057596		ENSMUSG00000010358		ENSMUSG00000038147	Cd84
ENSMUSG00000062488		ENSMUSG00000036905		ENSMUSG00000010461		ENSMUSG00000062488	Ifit3b
ENSMUSG00000060802		ENSMUSG00000020932		ENSMUSG00000011171		ENSMUSG00000060802	B2m
ENSMUSG00000041828		ENSMUSG00000004707		ENSMUSG00000015090		ENSMUSG00000041828	Abca8a
ENSMUSG00000034459		ENSMUSG00000035208		ENSMUSG00000015340		ENSMUSG00000034459	Ifit1
ENSMUSG00000104713		ENSMUSG00000029605		ENSMUSG00000015355		ENSMUSG00000104713	Gbp6
ENSMUSG00000040296		ENSMUSG00000070327		ENSMUSG00000015568		ENSMUSG00000040296	Ddx58
ENSMUSG00000029605		ENSMUSG00000030579		ENSMUSG00000016206		ENSMUSG00000029605	Oas1b
ENSMUSG00000030921		ENSMUSG00000061232		ENSMUSG00000016256		ENSMUSG00000030921	Trim30a
ENSMUSG00000074151		ENSMUSG00000104713		ENSMUSG00000016496		ENSMUSG00000074151	Nlrc5
ENSMUSG00000073489		ENSMUSG00000041828		ENSMUSG00000018008		ENSMUSG00000073489	Ifi204
ENSMUSG00000074896		ENSMUSG00000040296		ENSMUSG00000018774		ENSMUSG00000074896	Ifit3
ENSMUSG00000004707		ENSMUSG00000030107		ENSMUSG00000018819		ENSMUSG00000004707	Ly9
ENSMUSG00000030107		ENSMUSG00000028364		ENSMUSG00000018920		ENSMUSG00000030107	Usp18
ENSMUSG00000018774		ENSMUSG00000073489		ENSMUSG00000018927		ENSMUSG00000018774	Cd68
ENSMUSG00000001506		ENSMUSG00000000290		ENSMUSG00000019232		ENSMUSG00000001506	Col1a1
ENSMUSG00000020143		ENSMUSG00000030921		ENSMUSG00000019874		ENSMUSG00000020143	Dock2
ENSMUSG00000064267		ENSMUSG00000001506		ENSMUSG00000019891		ENSMUSG00000064267	Hvcn1
ENSMUSG00000061232		ENSMUSG00000038147		ENSMUSG00000019929		ENSMUSG00000061232	H2-K1
ENSMUSG00000027995		ENSMUSG00000074151		ENSMUSG00000020120		ENSMUSG00000027995	Tlr2
ENSMUSG00000020932		ENSMUSG00000079017		ENSMUSG00000020396		ENSMUSG00000020932	Gfap
ENSMUSG00000034422		ENSMUSG00000030577		ENSMUSG00000020399		ENSMUSG00000034422	Parp14
ENSMUSG00000004730		ENSMUSG00000115529		ENSMUSG00000020467		ENSMUSG00000004730	Adgre1
ENSMUSG00000046718		ENSMUSG00000008789		ENSMUSG00000020473		ENSMUSG00000046718	Bst2
ENSMUSG00000026896		ENSMUSG00000026395		ENSMUSG00000020638		ENSMUSG00000026896	Ifih1
ENSMUSG00000025888		ENSMUSG00000025498		ENSMUSG00000020641		ENSMUSG00000025888	Casp1
ENSMUSG00000028268		ENSMUSG00000064267		ENSMUSG00000020644		ENSMUSG00000028268	Gbp3
ENSMUSG00000079017		ENSMUSG00000046718		ENSMUSG00000020788		ENSMUSG00000079017	Ifi27l2a
ENSMUSG00000063564		ENSMUSG00000018774		ENSMUSG00000020848		ENSMUSG00000063564	Col23a1
ENSMUSG00000037921		ENSMUSG00000034422		ENSMUSG00000020866		ENSMUSG00000037921	Ddx60
ENSMUSG00000028364		ENSMUSG00000105096		ENSMUSG00000020932		ENSMUSG00000028364	Tnc
ENSMUSG00000025498		ENSMUSG00000037921		ENSMUSG00000021070		ENSMUSG00000025498	Irf7
ENSMUSG00000023224		ENSMUSG00000044043		ENSMUSG00000021091		ENSMUSG00000023224	Serping1
ENSMUSG00000068129		ENSMUSG00000078853		ENSMUSG00000021186		ENSMUSG00000068129	Cst7
ENSMUSG00000003282		ENSMUSG00000021665		ENSMUSG00000021250		ENSMUSG00000003282	Plag1
ENSMUSG00000070327		ENSMUSG00000028268		ENSMUSG00000021423		ENSMUSG00000070327	Rnf213
ENSMUSG00000036036		ENSMUSG00000026295		ENSMUSG00000021665		ENSMUSG00000036036	Zfp57
ENSMUSG00000005803		ENSMUSG00000025888		ENSMUSG00000021822		ENSMUSG00000005803	Sqor
ENSMUSG00000115529		ENSMUSG00000027995		ENSMUSG00000021876		ENSMUSG00000115529	9630013A20Rik
ENSMUSG00000024079		ENSMUSG00000038179		ENSMUSG00000022014		ENSMUSG00000024079	Eif2ak2
ENSMUSG00000078853		ENSMUSG00000073555		ENSMUSG00000022176		ENSMUSG00000078853	Igtp
ENSMUSG00000022906		ENSMUSG00000026896		ENSMUSG00000022231		ENSMUSG00000022906	Parp9
ENSMUSG00000044043		ENSMUSG00000024164		ENSMUSG00000022311		ENSMUSG00000044043	Pcdhb14
ENSMUSG00000026104		ENSMUSG00000004730		ENSMUSG00000022488		ENSMUSG00000026104	Stat1
ENSMUSG00000044468		ENSMUSG00000022906		ENSMUSG00000022548		ENSMUSG00000044468	Tent5c
ENSMUSG00000049107		ENSMUSG00000021091		ENSMUSG00000022656		ENSMUSG00000049107	Ntf3
ENSMUSG00000040565		ENSMUSG00000024079		ENSMUSG00000022895		ENSMUSG00000040565	Btaf1
ENSMUSG00000105096		ENSMUSG00000036036		ENSMUSG00000022901		ENSMUSG00000105096	Gbp10
ENSMUSG00000026355		ENSMUSG00000112148		ENSMUSG00000022912		ENSMUSG00000026355	Mcm6
ENSMUSG00000040552		ENSMUSG00000020143		ENSMUSG00000023186		ENSMUSG00000040552	C3ar1
ENSMUSG00000073555		ENSMUSG00000044468		ENSMUSG00000023224		ENSMUSG00000073555	Gm4951
ENSMUSG00000021091		ENSMUSG00000000682		ENSMUSG00000023992		ENSMUSG00000021091	Serpina3n
ENSMUSG00000056737		ENSMUSG00000016256		ENSMUSG00000024079		ENSMUSG00000056737	Capg
ENSMUSG00000070527		ENSMUSG00000015355		ENSMUSG00000024164		ENSMUSG00000070527	Mkrn3
ENSMUSG00000024300		ENSMUSG00000026104		ENSMUSG00000024300		ENSMUSG00000024300	Myo1f
ENSMUSG00000073590		ENSMUSG00000046764		ENSMUSG00000024338		ENSMUSG00000073590	3222401L13Rik
ENSMUSG00000022656		ENSMUSG00000023224		ENSMUSG00000024339		ENSMUSG00000022656	Nectin3
ENSMUSG00000021665		ENSMUSG00000040552		ENSMUSG00000024397		ENSMUSG00000021665	Hexb
ENSMUSG00000026656		ENSMUSG00000073590		ENSMUSG00000024610		ENSMUSG00000026656	Fcgr2b
ENSMUSG00000030577		ENSMUSG00000004110		ENSMUSG00000024736		ENSMUSG00000030577	Cd22
ENSMUSG00000000682		ENSMUSG00000033355		ENSMUSG00000024810		ENSMUSG00000000682	Cd52
ENSMUSG00000016256		ENSMUSG00000049107		ENSMUSG00000024966		ENSMUSG00000016256	Ctsz
ENSMUSG00000056144		ENSMUSG00000026536		ENSMUSG00000025083		ENSMUSG00000056144	Trim34a
ENSMUSG00000033355		ENSMUSG00000069793		ENSMUSG00000025492		ENSMUSG00000033355	Rtp4
ENSMUSG00000052776		ENSMUSG00000052776		ENSMUSG00000025582		ENSMUSG00000052776	Oas1a
ENSMUSG00000020467		ENSMUSG00000003282		ENSMUSG00000025887		ENSMUSG00000020467	Efemp1
ENSMUSG00000004266		ENSMUSG00000026656		ENSMUSG00000025888		ENSMUSG00000004266	Ptpn6
ENSMUSG00000046186		ENSMUSG00000070527		ENSMUSG00000025889		ENSMUSG00000046186	Cd109
ENSMUSG00000066258		ENSMUSG00000046186		ENSMUSG00000026043		ENSMUSG00000066258	Trim12a
ENSMUSG00000024339		ENSMUSG00000000982		ENSMUSG00000026094		ENSMUSG00000024339	Tap2
ENSMUSG00000016496		ENSMUSG00000002325		ENSMUSG00000026104		ENSMUSG00000016496	Cd274
ENSMUSG00000026177		ENSMUSG00000118642		ENSMUSG00000026177		ENSMUSG00000026177	Slc11a1
ENSMUSG00000025887		ENSMUSG00000015568		ENSMUSG00000026365		ENSMUSG00000025887	Casp12
ENSMUSG00000041515		ENSMUSG00000073491		ENSMUSG00000026395		ENSMUSG00000041515	Irf8
ENSMUSG00000067212		ENSMUSG00000056144		ENSMUSG00000026480		ENSMUSG00000067212	H2-T23
ENSMUSG00000052336		ENSMUSG00000056737		ENSMUSG00000026548		ENSMUSG00000052336	Cx3cr1
ENSMUSG00000063286		ENSMUSG00000119584		ENSMUSG00000026656		ENSMUSG00000063286	Gvin-ps7
ENSMUSG00000022488		ENSMUSG00000071068		ENSMUSG00000026676		ENSMUSG00000022488	Nckap1l
ENSMUSG00000069793		ENSMUSG00000022656		ENSMUSG00000026822		ENSMUSG00000069793	Slfn9
ENSMUSG00000005397		ENSMUSG00000037849		ENSMUSG00000026896		ENSMUSG00000005397	Nid1
ENSMUSG00000049502		ENSMUSG00000007891		ENSMUSG00000027078		ENSMUSG00000049502	Dtx3l
ENSMUSG00000112148		ENSMUSG00000026177		ENSMUSG00000027270		ENSMUSG00000112148	Lilrb4a
ENSMUSG00000015355		ENSMUSG00000058163		ENSMUSG00000027322		ENSMUSG00000015355	Cd48
ENSMUSG00000073411		ENSMUSG00000027489		ENSMUSG00000027375		ENSMUSG00000073411	H2-D1
ENSMUSG00000004110		ENSMUSG00000040565		ENSMUSG00000027489		ENSMUSG00000004110	Cacna1e
ENSMUSG00000022176		ENSMUSG00000005803		ENSMUSG00000027995		ENSMUSG00000022176	Rem2
ENSMUSG00000040253		ENSMUSG00000024339		ENSMUSG00000028037		ENSMUSG00000040253	Gbp7
ENSMUSG00000027489		ENSMUSG00000016496		ENSMUSG00000028145		ENSMUSG00000027489	Necab3
ENSMUSG00000044933		ENSMUSG00000025887		ENSMUSG00000028268		ENSMUSG00000044933	Sstr3
ENSMUSG00000010461		ENSMUSG00000056888		ENSMUSG00000028270		ENSMUSG00000010461	Eya4
ENSMUSG00000078945		ENSMUSG00000047735		ENSMUSG00000028360		ENSMUSG00000078945	Naip2
ENSMUSG00000039457		ENSMUSG00000104346		ENSMUSG00000028364		ENSMUSG00000039457	Ppl
ENSMUSG00000000560		ENSMUSG00000045932		ENSMUSG00000028581		ENSMUSG00000000560	Gabra2
ENSMUSG00000020120		ENSMUSG00000024300		ENSMUSG00000028655		ENSMUSG00000020120	Plek
ENSMUSG00000047632		ENSMUSG00000020467		ENSMUSG00000028755		ENSMUSG00000047632	Fgfbp3
ENSMUSG00000042532		ENSMUSG00000054509		ENSMUSG00000028782		ENSMUSG00000042532	Golga7b
ENSMUSG00000091183		ENSMUSG00000010461		ENSMUSG00000029298		ENSMUSG00000091183	Gm5141
ENSMUSG00000015568		ENSMUSG00000060550		ENSMUSG00000029304		ENSMUSG00000015568	Lpl
ENSMUSG00000058715		ENSMUSG00000063286		ENSMUSG00000029311		ENSMUSG00000058715	Fcer1g
ENSMUSG00000002325		ENSMUSG00000078945		ENSMUSG00000029561		ENSMUSG00000002325	Irf9
ENSMUSG00000046764		ENSMUSG00000040253		ENSMUSG00000029602		ENSMUSG00000046764	A530053G22Rik
ENSMUSG00000026295		ENSMUSG00000067212		ENSMUSG00000029605		ENSMUSG00000026295	Spp2
ENSMUSG00000057143		ENSMUSG00000024338		ENSMUSG00000029657		ENSMUSG00000057143	Trim12c
ENSMUSG00000029298		ENSMUSG00000090942		ENSMUSG00000029762		ENSMUSG00000029298	Gbp9
ENSMUSG00000031618		ENSMUSG00000041062		ENSMUSG00000029816		ENSMUSG00000031618	Nr3c2
ENSMUSG00000051242		ENSMUSG00000063564		ENSMUSG00000029826		ENSMUSG00000051242	Pcdhb9
ENSMUSG00000049723		ENSMUSG00000000386		ENSMUSG00000029843		ENSMUSG00000049723	Mmp12
ENSMUSG00000073491		ENSMUSG00000044933		ENSMUSG00000030107		ENSMUSG00000073491	Ifi213
ENSMUSG00000024338		ENSMUSG00000027514		ENSMUSG00000030218		ENSMUSG00000024338	Psmb8
ENSMUSG00000023341		ENSMUSG00000032690		ENSMUSG00000030376		ENSMUSG00000023341	Mx2
ENSMUSG00000047735		ENSMUSG00000066861		ENSMUSG00000030577		ENSMUSG00000047735	Samd9l
ENSMUSG00000035929		ENSMUSG00000031618		ENSMUSG00000030579		ENSMUSG00000035929	H2-Q4
ENSMUSG00000060519		ENSMUSG00000049502		ENSMUSG00000030674		ENSMUSG00000060519	Tor3a
ENSMUSG00000033777		ENSMUSG00000035929		ENSMUSG00000030786		ENSMUSG00000033777	Tlr13
ENSMUSG00000029661		ENSMUSG00000043263		ENSMUSG00000030789		ENSMUSG00000029661	Col1a2
ENSMUSG00000097415		ENSMUSG00000026548		ENSMUSG00000030806		ENSMUSG00000097415	AU020206
ENSMUSG00000029915		ENSMUSG00000029298		ENSMUSG00000030921		ENSMUSG00000029915	Clec5a
ENSMUSG00000051486		ENSMUSG00000050558		ENSMUSG00000031239		ENSMUSG00000051486	Pcdhb11
ENSMUSG00000036908		ENSMUSG00000041515		ENSMUSG00000031425		ENSMUSG00000036908	Unc93b1
ENSMUSG00000052160		ENSMUSG00000023341		ENSMUSG00000031618		ENSMUSG00000052160	Pld4
ENSMUSG00000045932		ENSMUSG00000005397		ENSMUSG00000032060		ENSMUSG00000045932	Ifit2
ENSMUSG00000069044		ENSMUSG00000004266		ENSMUSG00000032359		ENSMUSG00000041046	Ramp3
ENSMUSG00000041046		ENSMUSG00000025889		ENSMUSG00000032436		ENSMUSG00000007891	Ctsd
ENSMUSG00000007891		ENSMUSG00000028037		ENSMUSG00000032446		ENSMUSG00000018008	Cyth4
ENSMUSG00000018008		ENSMUSG00000047632		ENSMUSG00000032690		ENSMUSG00000028037	Ifi44
ENSMUSG00000028037		ENSMUSG00000052336		ENSMUSG00000032854		ENSMUSG00000041062	Mslnl
ENSMUSG00000041062		ENSMUSG00000058715		ENSMUSG00000032890		ENSMUSG00000028270	Gbp2
ENSMUSG00000028270		ENSMUSG00000091649		ENSMUSG00000032936		ENSMUSG00000032436	Cmtm7
ENSMUSG00000032436		ENSMUSG00000028270		ENSMUSG00000033061		ENSMUSG00000029798	Herc6
ENSMUSG00000029798		ENSMUSG00000022488		ENSMUSG00000033355		ENSMUSG00000059498	Fcgr3
ENSMUSG00000059498		ENSMUSG00000073490		ENSMUSG00000033777		ENSMUSG00000024397	Aif1
ENSMUSG00000024397		ENSMUSG00000000560		ENSMUSG00000033880		ENSMUSG00000032690	Oas2
ENSMUSG00000032690		ENSMUSG00000038507		ENSMUSG00000034275		ENSMUSG00000104346	Pcdhga3
ENSMUSG00000104346		ENSMUSG00000029915		ENSMUSG00000034330		ENSMUSG00000028859	Csf3r
ENSMUSG00000028859		ENSMUSG00000022176		ENSMUSG00000034422		ENSMUSG00000006519	Cyba
ENSMUSG00000006519		ENSMUSG00000073411		ENSMUSG00000034459		ENSMUSG00000040613	Apobec1
ENSMUSG00000040613		ENSMUSG00000018927		ENSMUSG00000034460		ENSMUSG00000000982	Ccl3
ENSMUSG00000000982		ENSMUSG00000020120		ENSMUSG00000034810		ENSMUSG00000018920	Cxcl16
ENSMUSG00000018920		ENSMUSG00000026355		ENSMUSG00000035208		ENSMUSG00000050558	Prokr2
ENSMUSG00000050558		ENSMUSG00000051486		ENSMUSG00000035274		ENSMUSG00000054509	Parp4
ENSMUSG00000054509		ENSMUSG00000035692		ENSMUSG00000035692		ENSMUSG00000039903	Eva1c
ENSMUSG00000039903		ENSMUSG00000066258		ENSMUSG00000035735		ENSMUSG00000029919	Hpgds
ENSMUSG00000029919		ENSMUSG00000020641		ENSMUSG00000035929		ENSMUSG00000008789	Ceacam5
ENSMUSG00000008789		ENSMUSG00000033777		ENSMUSG00000036036		ENSMUSG00000021423	Ly86
ENSMUSG00000021423		ENSMUSG00000097415		ENSMUSG00000036887		ENSMUSG00000058163	Gm5431
ENSMUSG00000058163		ENSMUSG00000047117		ENSMUSG00000036896		ENSMUSG00000043263	Ifi209
ENSMUSG00000043263		ENSMUSG00000059498		ENSMUSG00000036905		ENSMUSG00000000386	Mx1
ENSMUSG00000000386		ENSMUSG00000096929		ENSMUSG00000037321		ENSMUSG00000026548	Slamf9
ENSMUSG00000026548		ENSMUSG00000079419		ENSMUSG00000037362		ENSMUSG00000023249	Parp3
ENSMUSG00000023249		ENSMUSG00000024397		ENSMUSG00000037416		ENSMUSG00000068699	Flnc
ENSMUSG00000068699		ENSMUSG00000060519		ENSMUSG00000037625		ENSMUSG00000004609	Cd33
ENSMUSG00000004609		ENSMUSG00000028859		ENSMUSG00000037921		ENSMUSG00000038507	Parp12
ENSMUSG00000038507		ENSMUSG00000042532		ENSMUSG00000038007		ENSMUSG00000018927	Ccl6
ENSMUSG00000018927		ENSMUSG00000018920		ENSMUSG00000038147		ENSMUSG00000022895	Ets2
ENSMUSG00000022895		ENSMUSG00000024679		ENSMUSG00000038257		ENSMUSG00000025889	Snca
ENSMUSG00000025889		ENSMUSG00000039457		ENSMUSG00000038393		ENSMUSG00000020641	Rsad2
ENSMUSG00000020641		ENSMUSG00000022014		ENSMUSG00000038418		ENSMUSG00000024164	C3
ENSMUSG00000024164		ENSMUSG00000109654		ENSMUSG00000038507		ENSMUSG00000027514	Zbp1
ENSMUSG00000027514		ENSMUSG00000022548		ENSMUSG00000038555		ENSMUSG00000018819	Lsp1
ENSMUSG00000018819		ENSMUSG00000009670		ENSMUSG00000038642		ENSMUSG00000026536	Ifi211
ENSMUSG00000026536		ENSMUSG00000112023		ENSMUSG00000039005		ENSMUSG00000038179	Slamf7
ENSMUSG00000038179		ENSMUSG00000029798		ENSMUSG00000039457		ENSMUSG00000108168	Gm43864
ENSMUSG00000108168		ENSMUSG00000061132		ENSMUSG00000039728		ENSMUSG00000072762	4930522L14Rik
ENSMUSG00000072762		ENSMUSG00000051242		ENSMUSG00000039809		ENSMUSG00000040483	Xaf1
ENSMUSG00000040483		ENSMUSG00000052160		ENSMUSG00000039903		ENSMUSG00000023905	Tnfrsf12a
ENSMUSG00000023905		ENSMUSG00000073902		ENSMUSG00000039997		ENSMUSG00000032359	Ctsh
ENSMUSG00000032359		ENSMUSG00000034855		ENSMUSG00000040152		ENSMUSG00000073902	Gvin3
ENSMUSG00000073902		ENSMUSG00000028755		ENSMUSG00000040253		ENSMUSG00000079084	Ccdc82
ENSMUSG00000079084		ENSMUSG00000002985		ENSMUSG00000040296		ENSMUSG00000027078	Ube2l6
ENSMUSG00000027078		ENSMUSG00000040613		ENSMUSG00000040536		ENSMUSG00000026090	Cracdl
ENSMUSG00000026090		ENSMUSG00000108168		ENSMUSG00000040552		ENSMUSG00000048865	Arhgap30
ENSMUSG00000048865		ENSMUSG00000068699		ENSMUSG00000040565		ENSMUSG00000035692	Isg15
ENSMUSG00000035692		ENSMUSG00000037625		ENSMUSG00000040612		ENSMUSG00000073490	Ifi207
ENSMUSG00000073490		ENSMUSG00000009376		ENSMUSG00000040613		ENSMUSG00000064294	Aox3
ENSMUSG00000064294		ENSMUSG00000032436		ENSMUSG00000040653		ENSMUSG00000002147	Stat6
ENSMUSG00000002147		ENSMUSG00000018008		ENSMUSG00000040747		ENSMUSG00000040747	Cd53
ENSMUSG00000040747		ENSMUSG00000103800		ENSMUSG00000040972		ENSMUSG00000026946	Nmi
ENSMUSG00000026946		ENSMUSG00000052397		ENSMUSG00000041046		ENSMUSG00000071068	Treml2
ENSMUSG00000071068		ENSMUSG00000018819		ENSMUSG00000041062		ENSMUSG00000090942	F830016B08Rik
ENSMUSG00000090942		ENSMUSG00000023905		ENSMUSG00000041329		ENSMUSG00000042246	Tmc7
ENSMUSG00000042246		ENSMUSG00000040747		ENSMUSG00000041515		ENSMUSG00000044811	Cd300c2
ENSMUSG00000044811		ENSMUSG00000028459		ENSMUSG00000041596		ENSMUSG00000103800	Pcdha8
ENSMUSG00000103800		ENSMUSG00000059456		ENSMUSG00000041828		ENSMUSG00000061132	Blnk
ENSMUSG00000061132		ENSMUSG00000064294		ENSMUSG00000042109		ENSMUSG00000079419	Ms4a6c
ENSMUSG00000079419		ENSMUSG00000036908		ENSMUSG00000042532		ENSMUSG00000104318	Pcdha7
ENSMUSG00000104318		ENSMUSG00000098973		ENSMUSG00000042644		ENSMUSG00000022014	Epsti1
ENSMUSG00000022014		ENSMUSG00000038393		ENSMUSG00000042834		ENSMUSG00000028755	Cda
ENSMUSG00000028755		ENSMUSG00000057143		ENSMUSG00000043263		ENSMUSG00000037849	Ifi206
ENSMUSG00000037849		ENSMUSG00000029661		ENSMUSG00000044042		ENSMUSG00000040170	Fmo2
ENSMUSG00000040170		ENSMUSG00000069792		ENSMUSG00000044468		ENSMUSG00000044583	Tlr7
ENSMUSG00000044583		ENSMUSG00000066677		ENSMUSG00000044583		ENSMUSG00000047117	Ankdd1b
ENSMUSG00000047117		ENSMUSG00000007877		ENSMUSG00000044811		ENSMUSG00000024679	Ms4a6d
ENSMUSG00000024679		ENSMUSG00000042644		ENSMUSG00000044933		ENSMUSG00000022831	Hcls1
ENSMUSG00000022831		ENSMUSG00000022231		ENSMUSG00000045215		ENSMUSG00000040653	Ppp1r14c
ENSMUSG00000040653		ENSMUSG00000040483		ENSMUSG00000045827		ENSMUSG00000118642	AY036118
ENSMUSG00000118642		ENSMUSG00000021423		ENSMUSG00000045932		ENSMUSG00000037321	Tap1
ENSMUSG00000037321		ENSMUSG00000026090		ENSMUSG00000046186		ENSMUSG00000091649	Phf11b
ENSMUSG00000091649		ENSMUSG00000041817		ENSMUSG00000046718		ENSMUSG00000110649	Gm40466
ENSMUSG00000110649		ENSMUSG00000103037		ENSMUSG00000046764		ENSMUSG00000027950	Chrnb2
ENSMUSG00000027950		ENSMUSG00000073409		ENSMUSG00000046805		ENSMUSG00000051506	Wdfy4
ENSMUSG00000051506		ENSMUSG00000041046		ENSMUSG00000046879		ENSMUSG00000007877	Tcap
ENSMUSG00000007877		ENSMUSG00000044811		ENSMUSG00000047632		ENSMUSG00000039997	Ifi203
ENSMUSG00000039997		ENSMUSG00000006519		ENSMUSG00000047735		ENSMUSG00000060550	H2-Q7
ENSMUSG00000060550		ENSMUSG00000097929		ENSMUSG00000047976		ENSMUSG00000020573	Pik3cg
ENSMUSG00000020573		ENSMUSG00000044719		ENSMUSG00000048142		ENSMUSG00000021822	Plau
ENSMUSG00000021822		ENSMUSG00000069874		ENSMUSG00000048304		ENSMUSG00000069874	Irgm2
ENSMUSG00000069874		ENSMUSG00000048424		ENSMUSG00000048424		ENSMUSG00000026676	Ccdc3
ENSMUSG00000026676		ENSMUSG00000037321		ENSMUSG00000049107		ENSMUSG00000079598	Clec2l
ENSMUSG00000079598		ENSMUSG00000041827		ENSMUSG00000050335		ENSMUSG00000066861	Oas1g
ENSMUSG00000066861		ENSMUSG00000024331		ENSMUSG00000050558		ENSMUSG00000022548	Apod
ENSMUSG00000022548		ENSMUSG00000052229		ENSMUSG00000050708		ENSMUSG00000009376	Met
ENSMUSG00000009376		ENSMUSG00000022895		ENSMUSG00000051029		ENSMUSG00000056888	Glipr1
ENSMUSG00000056888		ENSMUSG00000040170		ENSMUSG00000051111		ENSMUSG00000096929	A330023F24Rik
ENSMUSG00000096929		ENSMUSG00000028782		ENSMUSG00000051790		ENSMUSG00000051599	Pcdhb2
ENSMUSG00000051599		ENSMUSG00000056031		ENSMUSG00000052160		ENSMUSG00000056116	H2-T22
ENSMUSG00000056116		ENSMUSG00000054072		ENSMUSG00000052229		ENSMUSG00000030793	Pycard
ENSMUSG00000030793		ENSMUSG00000051599		ENSMUSG00000052276		ENSMUSG00000037625	Cldn11
ENSMUSG00000037625		ENSMUSG00000030798		ENSMUSG00000052305		ENSMUSG00000037686	Aspg
ENSMUSG00000037686		ENSMUSG00000021822		ENSMUSG00000052397		ENSMUSG00000070348	Ccnd1
ENSMUSG00000070348		ENSMUSG00000044042		ENSMUSG00000052776		ENSMUSG00000072620	Slfn2
ENSMUSG00000072620		ENSMUSG00000042834		ENSMUSG00000053399		ENSMUSG00000048424	Ranbp3l
ENSMUSG00000048424		ENSMUSG00000039903		ENSMUSG00000054072		ENSMUSG00000108825	Gm45838
ENSMUSG00000026358		ENSMUSG00000096727		ENSMUSG00000054509		ENSMUSG00000043943	Naalad2
ENSMUSG00000026285		ENSMUSG00000027078		ENSMUSG00000054675		ENSMUSG00000097929	Tunar
ENSMUSG00000108825		ENSMUSG00000044583		ENSMUSG00000055172		ENSMUSG00000002699	Lcp2
ENSMUSG00000043943		ENSMUSG00000056296		ENSMUSG00000056116		ENSMUSG00000056031	9330154J02Rik
ENSMUSG00000032661		ENSMUSG00000089679		ENSMUSG00000056144		ENSMUSG00000055541	Lair1
ENSMUSG00000097929		ENSMUSG00000016206		ENSMUSG00000056296		ENSMUSG00000016206	H2-M3
ENSMUSG00000002699		ENSMUSG00000019232		ENSMUSG00000056737		ENSMUSG00000025402	Nab2
ENSMUSG00000056031		ENSMUSG00000032359		ENSMUSG00000056999		ENSMUSG00000059456	Ptk2b
ENSMUSG00000055541		ENSMUSG00000046215		ENSMUSG00000057143		ENSMUSG00000059970	Hspa2
ENSMUSG00000016206		ENSMUSG00000027322		ENSMUSG00000057596		ENSMUSG00000019820	Utrn
ENSMUSG00000025402		ENSMUSG00000004609		ENSMUSG00000058163		ENSMUSG00000024308	Tapbp
ENSMUSG00000059456		ENSMUSG00000103897		ENSMUSG00000058715		ENSMUSG00000000275	Trim25
ENSMUSG00000059970		ENSMUSG00000068245		ENSMUSG00000058773		ENSMUSG00000091549	Gm6548
ENSMUSG00000019820		ENSMUSG00000006522		ENSMUSG00000059456		ENSMUSG00000022901	Cd86
ENSMUSG00000024308		ENSMUSG00000022876		ENSMUSG00000059498		ENSMUSG00000032041	Tirap
ENSMUSG00000000275		ENSMUSG00000097572		ENSMUSG00000059970		ENSMUSG00000034330	Plcg2
ENSMUSG00000091549		ENSMUSG00000035202		ENSMUSG00000060519		ENSMUSG00000112023	Lilrb4b
ENSMUSG00000022901		ENSMUSG00000068220		ENSMUSG00000060550		ENSMUSG00000038393	Txnip
ENSMUSG00000032041		ENSMUSG00000043157		ENSMUSG00000060568		ENSMUSG00000115317	Gm32618
ENSMUSG00000034330		ENSMUSG00000070348		ENSMUSG00000060802		ENSMUSG00000058773	H1f5
ENSMUSG00000112023		ENSMUSG00000032890		ENSMUSG00000061132		ENSMUSG00000002985	Apoe
ENSMUSG00000038393		ENSMUSG00000052040		ENSMUSG00000061232		ENSMUSG00000106734	Gm20559
ENSMUSG00000115317		ENSMUSG00000026676		ENSMUSG00000061482		ENSMUSG00000020640	Itsn2
ENSMUSG00000058773		ENSMUSG00000103384		ENSMUSG00000061808		ENSMUSG00000074863	Platr25
ENSMUSG00000002985		ENSMUSG00000034460		ENSMUSG00000062209		ENSMUSG00000021998	Lcp1
ENSMUSG00000106734		ENSMUSG00000048865		ENSMUSG00000062488		ENSMUSG00000009670	Tex11
ENSMUSG00000020640		ENSMUSG00000072620		ENSMUSG00000063239		ENSMUSG00000068245	Phf11d
ENSMUSG00000074863		ENSMUSG00000022901		ENSMUSG00000063286		ENSMUSG00000001768	Rin2
ENSMUSG00000028238		ENSMUSG00000056116		ENSMUSG00000063564		ENSMUSG00000119584	Rn18s-rs5
ENSMUSG00000021998		ENSMUSG00000029919		ENSMUSG00000064215		ENSMUSG00000025017	Pik3ap1
ENSMUSG00000009670		ENSMUSG00000103677		ENSMUSG00000064267		ENSMUSG00000011256	Adam19
ENSMUSG00000068245		ENSMUSG00000072762		ENSMUSG00000064325		ENSMUSG00000103707	Pcdha6
ENSMUSG00000001768		ENSMUSG00000044827		ENSMUSG00000064341		ENSMUSG00000038844	Kif16b
ENSMUSG00000119584		ENSMUSG00000071753		ENSMUSG00000064345		ENSMUSG00000057346	Apol9a
ENSMUSG00000025017		ENSMUSG00000059970		ENSMUSG00000064363		ENSMUSG00000089679	Gm16299
ENSMUSG00000011256		ENSMUSG00000051506		ENSMUSG00000064370		ENSMUSG00000103037	Pcdhgb1
ENSMUSG00000103707		ENSMUSG00000091183		ENSMUSG00000067212		ENSMUSG00000068220	Lgals1
ENSMUSG00000038844		ENSMUSG00000022831		ENSMUSG00000067996		ENSMUSG00000109654	Gm3912
ENSMUSG00000057346		ENSMUSG00000029311		ENSMUSG00000067998		ENSMUSG00000028459	Cd72
ENSMUSG00000089679		ENSMUSG00000050708		ENSMUSG00000068220		ENSMUSG00000030047	Arhgap25
ENSMUSG00000103037		ENSMUSG00000037686		ENSMUSG00000068245		ENSMUSG00000052397	Ezr
ENSMUSG00000068220		ENSMUSG00000030793		ENSMUSG00000068373		ENSMUSG00000097440	Gm6277
ENSMUSG00000109654		ENSMUSG00000028150		ENSMUSG00000068699		ENSMUSG00000022876	Samsn1
ENSMUSG00000028459		ENSMUSG00000000275		ENSMUSG00000069516		ENSMUSG00000026222	Sp100
ENSMUSG00000030047		ENSMUSG00000079598		ENSMUSG00000069792		ENSMUSG00000034116	Vav1
ENSMUSG00000052397		ENSMUSG00000092083		ENSMUSG00000069793		ENSMUSG00000054072	Iigp1
ENSMUSG00000097440		ENSMUSG00000002699		ENSMUSG00000069874		ENSMUSG00000039851	4932438H23Rik
ENSMUSG00000022876		ENSMUSG00000069893		ENSMUSG00000069917		ENSMUSG00000015243	Abca1
ENSMUSG00000026222		ENSMUSG00000030047		ENSMUSG00000069919		ENSMUSG00000025533	Asl
ENSMUSG00000034116		ENSMUSG00000024308		ENSMUSG00000070327		ENSMUSG00000026674	Ddr2
ENSMUSG00000054072		ENSMUSG00000024737		ENSMUSG00000070348		ENSMUSG00000052229	Gpr17
ENSMUSG00000039851		ENSMUSG00000079084		ENSMUSG00000070570		ENSMUSG00000097823	Gm16701
ENSMUSG00000015243		ENSMUSG00000062296		ENSMUSG00000072620		ENSMUSG00000030798	Cd37
ENSMUSG00000025533		ENSMUSG00000039997		ENSMUSG00000073409		ENSMUSG00000015950	Ncf1
ENSMUSG00000026674		ENSMUSG00000040653		ENSMUSG00000073411		ENSMUSG00000027322	Siglec1
ENSMUSG00000052229		ENSMUSG00000030376		ENSMUSG00000073418		ENSMUSG00000034460	Six4
ENSMUSG00000097823		ENSMUSG00000110649		ENSMUSG00000073489		ENSMUSG00000066677	Ifi208
ENSMUSG00000030798		ENSMUSG00000025402		ENSMUSG00000073490		ENSMUSG00000095990	Zfp97
ENSMUSG00000015950		ENSMUSG00000091549		ENSMUSG00000073491		ENSMUSG00000046215	Rprml
ENSMUSG00000027322		ENSMUSG00000007613		ENSMUSG00000073555		ENSMUSG00000025578	Cbx8
ENSMUSG00000034460		ENSMUSG00000029762		ENSMUSG00000073902		ENSMUSG00000028150	Rorc
ENSMUSG00000066677		ENSMUSG00000031425		ENSMUSG00000073940		ENSMUSG00000096727	Psmb9
ENSMUSG00000095990		ENSMUSG00000106734		ENSMUSG00000074483		ENSMUSG00000092083	Kcnb2
ENSMUSG00000046215		ENSMUSG00000030674		ENSMUSG00000074896		ENSMUSG00000062296	Trank1
ENSMUSG00000025578		ENSMUSG00000000078		ENSMUSG00000075020		ENSMUSG00000007613	Tgfbr1
ENSMUSG00000044518		ENSMUSG00000021624		ENSMUSG00000076441		ENSMUSG00000021876	Rnase4
ENSMUSG00000028150		ENSMUSG00000063239		ENSMUSG00000078853		ENSMUSG00000103677	Pcdhga4
ENSMUSG00000090675		ENSMUSG00000043943		ENSMUSG00000078945		ENSMUSG00000022912	Pros1
ENSMUSG00000096727		ENSMUSG00000002147		ENSMUSG00000079017		ENSMUSG00000103770	Pcdha9
ENSMUSG00000092083		ENSMUSG00000026946		ENSMUSG00000079293		ENSMUSG00000042644	Itpr3
ENSMUSG00000062296		ENSMUSG00000020573		ENSMUSG00000079419		ENSMUSG00000044921	Rassf9
ENSMUSG00000007613		ENSMUSG00000003283		ENSMUSG00000079522		ENSMUSG00000030674	Qprt
ENSMUSG00000021876		ENSMUSG00000024621		ENSMUSG00000079598		ENSMUSG00000039989	Cbx4
ENSMUSG00000103677		ENSMUSG00000086022		ENSMUSG00000091549		ENSMUSG00000002108	Nr1h3
ENSMUSG00000022912		ENSMUSG00000031504		ENSMUSG00000091649		ENSMUSG00000022231	Sema5a
ENSMUSG00000103770		ENSMUSG00000112810		ENSMUSG00000092035		ENSMUSG00000044042	Fmn1
ENSMUSG00000042644		ENSMUSG00000068373		ENSMUSG00000092083		ENSMUSG00000024610	Cd74
ENSMUSG00000044921		ENSMUSG00000025492		ENSMUSG00000092090		ENSMUSG00000041817	Fam169a
ENSMUSG00000030674		ENSMUSG00000078922		ENSMUSG00000095041		ENSMUSG00000028782	Adgrb2
ENSMUSG00000039989		ENSMUSG00000103770		ENSMUSG00000095990		ENSMUSG00000024331	Dsc2
ENSMUSG00000002108		ENSMUSG00000053399		ENSMUSG00000096929		ENSMUSG00000017830	Dhx58
ENSMUSG00000022231		ENSMUSG00000070469		ENSMUSG00000097572		ENSMUSG00000003283	Hck
ENSMUSG00000044042		ENSMUSG00000021998		ENSMUSG00000097929		ENSMUSG00000025492	Ifitm3
ENSMUSG00000024610		ENSMUSG00000024610		ENSMUSG00000098557		ENSMUSG00000007440	Pcdha10
ENSMUSG00000041817		ENSMUSG00000023249		ENSMUSG00000098973		ENSMUSG00000024737	Slc15a3
ENSMUSG00000028782		ENSMUSG00000022912		ENSMUSG00000104713		ENSMUSG00000057337	Chst3
ENSMUSG00000024331		ENSMUSG00000104318		ENSMUSG00000109654		ENSMUSG00000044667	Plppr4
ENSMUSG00000017830		ENSMUSG00000011256		ENSMUSG00000110140		ENSMUSG00000042834	Nrep
ENSMUSG00000003283		ENSMUSG00000058818		ENSMUSG00000112148		ENSMUSG00000054675	Tmem119
ENSMUSG00000025492		ENSMUSG00000026175		ENSMUSG00000118642		ENSMUSG00000069893	9930111J21Rik1
ENSMUSG00000007440		ENSMUSG00000031636		ENSMUSG00000119584		ENSMUSG00000086022	Rad51ap2
ENSMUSG00000024737		ENSMUSG00000055172		ENSMUSG00002076601		ENSMUSG00000069792	Wfdc17
ENSMUSG00000057337		ENSMUSG00000102206		ENSMUSG00000007877		ENSMUSG00000001123	Lgals9
ENSMUSG00000044667		ENSMUSG00000058773		ENSMUSG00000013033		ENSMUSG00000044719	E230025N22Rik
ENSMUSG00000053541		ENSMUSG00000052142		ENSMUSG00000018899		ENSMUSG00000026288	Inpp5d
ENSMUSG00000042834		ENSMUSG00000042246		ENSMUSG00000021032		ENSMUSG00000102206	Pcdha11
ENSMUSG00000054675		ENSMUSG00000061143		ENSMUSG00000022876		ENSMUSG00000103897	Pcdhga8
ENSMUSG00000069893		ENSMUSG00000039005		ENSMUSG00000024331		ENSMUSG00000031636	Pdlim3
ENSMUSG00000086022		ENSMUSG00000020399		ENSMUSG00000026355		ENSMUSG00000029762	Akr1b8
ENSMUSG00000069792		ENSMUSG00000095990		ENSMUSG00000027737		ENSMUSG00000040528	Milr1
ENSMUSG00000001123		ENSMUSG00000027087		ENSMUSG00000028150		ENSMUSG00000041827	Oasl1
ENSMUSG00000044719		ENSMUSG00000070031		ENSMUSG00000028859		ENSMUSG00000030930	Chst15
ENSMUSG00000026288		ENSMUSG00000028360		ENSMUSG00000029695		ENSMUSG00000029311	Hsd17b11
ENSMUSG00000102206		ENSMUSG00000022439		ENSMUSG00000029915		ENSMUSG00000032890	Rims3
ENSMUSG00000103897		ENSMUSG00000033450		ENSMUSG00000030560		ENSMUSG00000074771	Ankef1
ENSMUSG00000031636		ENSMUSG00000018654		ENSMUSG00000035226		ENSMUSG00000040229	Gpr34
ENSMUSG00000029762		ENSMUSG00000025017		ENSMUSG00000039313		ENSMUSG00000110140	5430421F17Rik
ENSMUSG00000040528		ENSMUSG00000021876		ENSMUSG00000040564		ENSMUSG00000097572	Gm26797
ENSMUSG00000041827		ENSMUSG00000025355		ENSMUSG00000044349		ENSMUSG00000049866	Arl4c
ENSMUSG00000030930		ENSMUSG00000110140		ENSMUSG00000044708		ENSMUSG00000073409	H2-Q6
ENSMUSG00000029311		ENSMUSG00000108825		ENSMUSG00000046215		ENSMUSG00000018654	Ikzf1
ENSMUSG00000032890		ENSMUSG00000106093		ENSMUSG00000050121		ENSMUSG00000035202	Lars2
ENSMUSG00000028362		ENSMUSG00000055541		ENSMUSG00000062061		ENSMUSG00000022575	Gsdmd
ENSMUSG00000074771		ENSMUSG00000039853		ENSMUSG00000062591		ENSMUSG00000045215	Asxl3
ENSMUSG00000040229		ENSMUSG00000015829		ENSMUSG00000062785		ENSMUSG00000021624	Cd180
ENSMUSG00000110140		ENSMUSG00000024440		ENSMUSG00000064387		ENSMUSG00000019891	Dcbld1
ENSMUSG00000097572		ENSMUSG00000040229		ENSMUSG00000065353		ENSMUSG00000010358	Ifi35
ENSMUSG00000049866		ENSMUSG00000034116		ENSMUSG00000066129		ENSMUSG00000029484	Anxa3
ENSMUSG00000073409		ENSMUSG00000001768		ENSMUSG00000066258		ENSMUSG00000025352	Gdf11
ENSMUSG00000018654		ENSMUSG00000097762		ENSMUSG00000091183		ENSMUSG00000052085	Dock8
ENSMUSG00000035202		ENSMUSG00000025578		ENSMUSG00000091722		ENSMUSG00000020399	Havcr2
ENSMUSG00000022575		ENSMUSG00000019820		ENSMUSG00002076896		ENSMUSG00000018899	Irf1
ENSMUSG00000045215		ENSMUSG00000041538		ENSMUSG00000001123		ENSMUSG00000024462	Gabbr1
ENSMUSG00000021624		ENSMUSG00000038844		ENSMUSG00000003283		ENSMUSG00000024621	Csf1r
ENSMUSG00000019891		ENSMUSG00000079547		ENSMUSG00000020573		ENSMUSG00000070469	Adamtsl3
ENSMUSG00000010358		ENSMUSG00000010358		ENSMUSG00000021448		ENSMUSG00000056296	Synpr
ENSMUSG00000029484		ENSMUSG00000034330		ENSMUSG00000024403		ENSMUSG00000103092	Pcdha5
ENSMUSG00000025352		ENSMUSG00000007440		ENSMUSG00000025352		ENSMUSG00000022439	Parvg
ENSMUSG00000052085		ENSMUSG00000025533		ENSMUSG00000025533		ENSMUSG00000043458	Pcdhb12
ENSMUSG00000020399		ENSMUSG00000039851		ENSMUSG00000027514		ENSMUSG00000000078	Klf6
ENSMUSG00000018899		ENSMUSG00000045215		ENSMUSG00000027858		ENSMUSG00000087361	0610043K17Rik
ENSMUSG00000024462		ENSMUSG00000030930		ENSMUSG00000030411		ENSMUSG00000050708	Ftl1
ENSMUSG00000024621		ENSMUSG00000021070		ENSMUSG00000031504		ENSMUSG00000035697	Arhgap45
ENSMUSG00000070469		ENSMUSG00000015950		ENSMUSG00000033768		ENSMUSG00000052040	Klf13
ENSMUSG00000056296		ENSMUSG00000038555		ENSMUSG00000035697		ENSMUSG00000078607	1810010H24Rik
ENSMUSG00000103092		ENSMUSG00000026674		ENSMUSG00000037979		ENSMUSG00000006522	Itih3
ENSMUSG00000022439		ENSMUSG00000022575		ENSMUSG00000038630		ENSMUSG00000027087	Itgav
ENSMUSG00000043458		ENSMUSG00000035697		ENSMUSG00000040170		ENSMUSG00000039005	Tlr4
ENSMUSG00000000078		ENSMUSG00000005142		ENSMUSG00000041000		ENSMUSG00000029771	Irf5
ENSMUSG00000062082		ENSMUSG00000044921		ENSMUSG00000042246		ENSMUSG00000026175	Vil1
ENSMUSG00000087361		ENSMUSG00000022148		ENSMUSG00000047115		ENSMUSG00000052974	Cyp2f2
ENSMUSG00000050708		ENSMUSG00000027950		ENSMUSG00000049097		ENSMUSG00000031425	Plp1
ENSMUSG00000035697		ENSMUSG00000071341		ENSMUSG00000056888		ENSMUSG00000029994	Anxa4
ENSMUSG00000052040		ENSMUSG00000015243		ENSMUSG00000074151		ENSMUSG00000078922	Tgtp1
ENSMUSG00000078607		ENSMUSG00002076809		ENSMUSG00000086022		ENSMUSG00000031189	Aff2
ENSMUSG00000006522		ENSMUSG00000032092		ENSMUSG00000097415		ENSMUSG00000070031	Sp140
ENSMUSG00000027087		ENSMUSG00000039989		ENSMUSG00000003657		ENSMUSG00000036362	P2ry13
ENSMUSG00000039005		ENSMUSG00000032041		ENSMUSG00000013367		ENSMUSG00000048458	Inka2
ENSMUSG00000029771		ENSMUSG00000017830		ENSMUSG00000015839		ENSMUSG00000048612	Myof
ENSMUSG00000026175		ENSMUSG00000018899		ENSMUSG00000019146		ENSMUSG00000043157	Arl11
ENSMUSG00000052974		ENSMUSG00000040972		ENSMUSG00000020143		ENSMUSG00000071753	Cdr1os
ENSMUSG00000031425		ENSMUSG00000043458		ENSMUSG00000030772		ENSMUSG00000015829	Tnr
ENSMUSG00000029994		ENSMUSG00000002602		ENSMUSG00000033213		ENSMUSG00000103384	Gm37753
ENSMUSG00000078922		ENSMUSG00000001123		ENSMUSG00000034832		ENSMUSG00000039891	Txlnb
ENSMUSG00000031189		ENSMUSG00000070034		ENSMUSG00000039621		ENSMUSG00000068373	D430041D05Rik
ENSMUSG00000070031		ENSMUSG00000036362		ENSMUSG00000042826		ENSMUSG00000052142	Rasal3
ENSMUSG00000056290		ENSMUSG00000059149		ENSMUSG00000043157		ENSMUSG00000021070	Bdkrb2
ENSMUSG00000036362		ENSMUSG00000086311		ENSMUSG00000045532		ENSMUSG00000019232	Etnppl
ENSMUSG00000048458		ENSMUSG00000060568		ENSMUSG00000046402		ENSMUSG00000037225	Fgf2
ENSMUSG00000048612		ENSMUSG00000063972		ENSMUSG00000076439		ENSMUSG00000032092	Mpzl2
ENSMUSG00000043157		ENSMUSG00000057337		ENSMUSG00000112023		ENSMUSG00000044827	Tlr1
ENSMUSG00000071753		ENSMUSG00000049866		ENSMUSG00000113186		ENSMUSG00000028360	Slc44a5
ENSMUSG00000015829		ENSMUSG00000054675		ENSMUSG00000015599		ENSMUSG00000027955	Gask1b
ENSMUSG00000103384		ENSMUSG00000024672		ENSMUSG00000025017		ENSMUSG00000063239	Grm4
ENSMUSG00000039891		ENSMUSG00000047361		ENSMUSG00000027171		ENSMUSG00000047307	Pcdhb13
ENSMUSG00000068373		ENSMUSG00000020473		ENSMUSG00000027227		ENSMUSG00000051678	Pcdhb6
ENSMUSG00000052142		ENSMUSG00000115317		ENSMUSG00000030124		ENSMUSG00000074785	Plxnc1
ENSMUSG00000021070		ENSMUSG00000020638		ENSMUSG00000031189		ENSMUSG00000053158	Fes
ENSMUSG00000019232		ENSMUSG00000078921		ENSMUSG00000031636		ENSMUSG00000025764	Jade1
ENSMUSG00000037225		ENSMUSG00000026222		ENSMUSG00000034116		ENSMUSG00000113440	Gm46404
ENSMUSG00000032092		ENSMUSG00000040061		ENSMUSG00000038453		ENSMUSG00000038555	Reep2
ENSMUSG00000044827		ENSMUSG00000020644		ENSMUSG00000040483		ENSMUSG00000061143	Maml3
ENSMUSG00000028360		ENSMUSG00000023186		ENSMUSG00000041577		ENSMUSG00000072774	Zfp951
ENSMUSG00000027955		ENSMUSG00000028581		ENSMUSG00000043301		ENSMUSG00000071064	Zfp827
ENSMUSG00000063239		ENSMUSG00000031849		ENSMUSG00000048865		ENSMUSG00000044499	Hs3st5
ENSMUSG00000047307		ENSMUSG00000037994		ENSMUSG00000052974		ENSMUSG00000027858	Tspan2
ENSMUSG00000051678		ENSMUSG00000030966		ENSMUSG00000059173		ENSMUSG00000005142	Man2b1
ENSMUSG00000074785		ENSMUSG00000027375		ENSMUSG00000070034		ENSMUSG00000025355	Mmp19
ENSMUSG00000053158		ENSMUSG00000038375		ENSMUSG00000089715		ENSMUSG00000030376	Slc8a2
ENSMUSG00000025764		ENSMUSG00000103092		ENSMUSG00000016477		ENSMUSG00000031849	Comp
ENSMUSG00000113440		ENSMUSG00000103483		ENSMUSG00000017167		ENSMUSG00000020228	Helb
ENSMUSG00000038555		ENSMUSG00000033053		ENSMUSG00000018339		ENSMUSG00000036872	Abcc12
ENSMUSG00000061143		ENSMUSG00000048458		ENSMUSG00000026946		ENSMUSG00000053835	H2-T24
ENSMUSG00000045502		ENSMUSG00000043557		ENSMUSG00000027188		ENSMUSG00000033053	1700028P14Rik
ENSMUSG00000072774		ENSMUSG00000065353		ENSMUSG00000032372		ENSMUSG00000113626	Gm7240
ENSMUSG00000071064		ENSMUSG00000051029		ENSMUSG00000046152		ENSMUSG00000022148	Fyb
ENSMUSG00000044499		ENSMUSG00000020176		ENSMUSG00000048458		ENSMUSG00000028599	Tnfrsf1b
ENSMUSG00000027858		ENSMUSG00000040536		ENSMUSG00000064367		ENSMUSG00000002602	Axl
ENSMUSG00000005142		ENSMUSG00000040564		ENSMUSG00000073274		ENSMUSG00000024899	Papss2
ENSMUSG00000025355		ENSMUSG00000025352		ENSMUSG00000004460		ENSMUSG00000026956	Uap1l1
ENSMUSG00000030376		ENSMUSG00000062209		ENSMUSG00000024308		ENSMUSG00000032714	Syde1
ENSMUSG00000031849		ENSMUSG00000039232		ENSMUSG00000025794		ENSMUSG00000026480	Ncf2
ENSMUSG00000020228		ENSMUSG00000001131		ENSMUSG00000028463		ENSMUSG00000058818	Pirb
ENSMUSG00000036872		ENSMUSG00000113626		ENSMUSG00000032415		ENSMUSG00000040061	Plcb2
ENSMUSG00000053835		ENSMUSG00000075266		ENSMUSG00000036181		ENSMUSG00000103642	Gm37769
ENSMUSG00000033053		ENSMUSG00000071203		ENSMUSG00000067297		ENSMUSG00000024440	Pcdh12
ENSMUSG00000113626		ENSMUSG00000002111		ENSMUSG00000071341		ENSMUSG00000043557	Mdga1
ENSMUSG00000022148		ENSMUSG00000110986		ENSMUSG00000089679		ENSMUSG00000055172	C1ra
ENSMUSG00000028599		ENSMUSG00000052188		ENSMUSG00000108168		ENSMUSG00000030966	Trim21
ENSMUSG00000002602		ENSMUSG00000064371		ENSMUSG00000002108		ENSMUSG00000019880	Rspo3
ENSMUSG00000024899		ENSMUSG00000052305		ENSMUSG00000026223		ENSMUSG00000070034	Sp110
ENSMUSG00000026956		ENSMUSG00000031264		ENSMUSG00000032280		ENSMUSG00000059149	Mfsd4a
ENSMUSG00000032714		ENSMUSG00000078942		ENSMUSG00000068129		ENSMUSG00000037653	Kctd8
ENSMUSG00000026480		ENSMUSG00000015839		ENSMUSG00000000078		ENSMUSG00000026220	Slc16a14
ENSMUSG00000058818		ENSMUSG00000103707		ENSMUSG00000007594		ENSMUSG00000003418	St8sia6
ENSMUSG00000040061		ENSMUSG00000036565		ENSMUSG00000020218		ENSMUSG00000115471	C230086J09Rik
ENSMUSG00000103642		ENSMUSG00000036814		ENSMUSG00000022831		ENSMUSG00000060594	Layn
ENSMUSG00000024440		ENSMUSG00000029771		ENSMUSG00000023232		ENSMUSG00000110986	Gm20276
ENSMUSG00000043557		ENSMUSG00000022311		ENSMUSG00000023905		ENSMUSG00000025912	Mybl1
ENSMUSG00000055172		ENSMUSG00000053835		ENSMUSG00000029994		ENSMUSG00000025534	Gusb
ENSMUSG00000030966		ENSMUSG00000029602		ENSMUSG00000036908		ENSMUSG00000016477	E2f3
ENSMUSG00000019880		ENSMUSG00000031101		ENSMUSG00000037174		ENSMUSG00000053399	Adamts18
ENSMUSG00000070034		ENSMUSG00000098557		ENSMUSG00000049517		ENSMUSG00000097762	4732463B04Rik
ENSMUSG00000059149		ENSMUSG00000019891		ENSMUSG00000049866		ENSMUSG00000024965	Fermt3
ENSMUSG00000037653		ENSMUSG00000104240		ENSMUSG00000061689		ENSMUSG00000017724	Etv4
ENSMUSG00000026220		ENSMUSG00000103088		ENSMUSG00000069833		ENSMUSG00000015839	Nfe2l2
ENSMUSG00000003418		ENSMUSG00000026288		ENSMUSG00000073565		ENSMUSG00000033450	Tagap
ENSMUSG00000115471		ENSMUSG00000027858		ENSMUSG00000105096		ENSMUSG00000024846	Cst6
ENSMUSG00000043740		ENSMUSG00000025912		ENSMUSG00002076809		ENSMUSG00000036334	Igsf10
ENSMUSG00000060594		ENSMUSG00000079434		ENSMUSG00000015879		ENSMUSG00000079547	H2-DMb1
ENSMUSG00000110986		ENSMUSG00000020640		ENSMUSG00000033579		ENSMUSG00000030124	Lag3
ENSMUSG00000025912		ENSMUSG00000079491		ENSMUSG00000041817		ENSMUSG00000020644	Id2
ENSMUSG00000025534		ENSMUSG00000003418		ENSMUSG00000045679		ENSMUSG00000074867	Zfp808
ENSMUSG00000016477		ENSMUSG00000028145		ENSMUSG00000046442		ENSMUSG00000054640	Slc8a1
ENSMUSG00000053399		ENSMUSG00000110235		ENSMUSG00000079547		ENSMUSG00000030786	Itgam
ENSMUSG00000097762		ENSMUSG00000048489		ENSMUSG00000099696		ENSMUSG00000042256	Ptchd4
ENSMUSG00000022218		ENSMUSG00000032596		ENSMUSG00000015243		ENSMUSG00000022177	Haus4
ENSMUSG00000024965		ENSMUSG00000089715		ENSMUSG00000019082		ENSMUSG00000041120	Nbl1
ENSMUSG00000017724		ENSMUSG00000028542		ENSMUSG00000019880		ENSMUSG00000034855	Cxcl10
ENSMUSG00000015839		ENSMUSG00000069919		ENSMUSG00000026536		ENSMUSG00000091722	Siah3
ENSMUSG00000033450		ENSMUSG00000077167		ENSMUSG00000037992		ENSMUSG00000028463	Car9
ENSMUSG00000024846		ENSMUSG00000069917		ENSMUSG00000041390		ENSMUSG00000040564	Apoc1
ENSMUSG00000036334		ENSMUSG00000039891		ENSMUSG00000041695		ENSMUSG00000063972	Nr6a1
ENSMUSG00000079547		ENSMUSG00000002108		ENSMUSG00000105504		ENSMUSG00000015879	Fam184b
ENSMUSG00000030124		ENSMUSG00000074785		ENSMUSG00000000386		ENSMUSG00000060568	Fam78b
ENSMUSG00000020644		ENSMUSG00000030786		ENSMUSG00000020140		ENSMUSG00000052188	Gm14964
ENSMUSG00000031583		ENSMUSG00000028463		ENSMUSG00000026380		ENSMUSG00000031504	Rab20
ENSMUSG00000074867		ENSMUSG00000030495		ENSMUSG00000030745		ENSMUSG00000047361	Gm973
ENSMUSG00000054640		ENSMUSG00000045573		ENSMUSG00000035352		ENSMUSG00000103483	Gm20162
ENSMUSG00000030786		ENSMUSG00000071713		ENSMUSG00000036594		ENSMUSG00000030495	Slc7a10
ENSMUSG00000042256		ENSMUSG00000045876		ENSMUSG00000000732		ENSMUSG00000098973	Mir6236
ENSMUSG00000022177		ENSMUSG00000037295		ENSMUSG00000025479		ENSMUSG00000116735	Gm49555
ENSMUSG00000041120		ENSMUSG00000064345		ENSMUSG00000055489		ENSMUSG00000023186	Vwa5a
ENSMUSG00000034855		ENSMUSG00000030124		ENSMUSG00000055866		ENSMUSG00000030560	Ctsc
ENSMUSG00000091722		ENSMUSG00000029843		ENSMUSG00000061983		ENSMUSG00000072763	5430403G16Rik
ENSMUSG00000028463		ENSMUSG00000029994		ENSMUSG00000070306		ENSMUSG00000073274	Gm14636
ENSMUSG00000040564		ENSMUSG00000036334		ENSMUSG00000038375		ENSMUSG00000040972	Igsf21
ENSMUSG00000063972		ENSMUSG00000097440		ENSMUSG00000056529		ENSMUSG00000006411	Nectin4
ENSMUSG00000015879		ENSMUSG00000115471		ENSMUSG00000057346		ENSMUSG00000027669	Gnb4
ENSMUSG00000060568		ENSMUSG00000024965		ENSMUSG00000110235		ENSMUSG00000104240	Gm36858
ENSMUSG00000052188		ENSMUSG00000087361		ENSMUSG00000113626		ENSMUSG00000028581	Laptm5
ENSMUSG00000031504		ENSMUSG00000092528		ENSMUSG00000115317		ENSMUSG00000078921	Tgtp2
ENSMUSG00000047361		ENSMUSG00000046027		ENSMUSG00000012296		ENSMUSG00000071341	Egr4
ENSMUSG00000018930		ENSMUSG00000042256		ENSMUSG00000031167		ENSMUSG00000051029	Serpinb1b
ENSMUSG00000103483		ENSMUSG00000074867		ENSMUSG00000033327		ENSMUSG00000085795	Zfp703
ENSMUSG00000030495		ENSMUSG00000031189		ENSMUSG00000040907		ENSMUSG00000074865	Zfp934
ENSMUSG00000098973		ENSMUSG00000107215		ENSMUSG00000044499		ENSMUSG00000036403	Cep135
ENSMUSG00000116735		ENSMUSG00000074863		ENSMUSG00000045573		ENSMUSG00000045876	Pcdhb8
ENSMUSG00000023186		ENSMUSG00000060924		ENSMUSG00000105703		ENSMUSG00000046688	Tifa
ENSMUSG00000030560		ENSMUSG00000011171		ENSMUSG00000023915		ENSMUSG00000025647	Shisa5
ENSMUSG00000072763		ENSMUSG00000044499		ENSMUSG00000029120		ENSMUSG00000061740	Cyp2d22
ENSMUSG00000073274		ENSMUSG00000052085		ENSMUSG00000039851		ENSMUSG00000018042	Cyb5r3
ENSMUSG00000040972		ENSMUSG00000039809		ENSMUSG00000062296		ENSMUSG00000028145	Them4
ENSMUSG00000006411		ENSMUSG00000117613		ENSMUSG00000076617		ENSMUSG00000113836	Gm3325
ENSMUSG00000027669		ENSMUSG00000029484		ENSMUSG00000018554		ENSMUSG00000022817	Itgb5
ENSMUSG00000104240		ENSMUSG00000027399		ENSMUSG00000021998		ENSMUSG00000020473	Aebp1
ENSMUSG00000028581		ENSMUSG00000027955		ENSMUSG00000024665		ENSMUSG00000068130	Zfp442
ENSMUSG00000078921		ENSMUSG00000020101		ENSMUSG00000026864		ENSMUSG00000044576	Garem2
ENSMUSG00000071341		ENSMUSG00000060206		ENSMUSG00000039976		ENSMUSG00000033102	Cdc14b
ENSMUSG00000051029		ENSMUSG00000019929		ENSMUSG00000052040		ENSMUSG00000046027	Stard5
ENSMUSG00000085795		ENSMUSG00000051678		ENSMUSG00000090461		ENSMUSG00000038375	Trp53inp2
ENSMUSG00000074865		ENSMUSG00000047115		ENSMUSG00000115529		ENSMUSG00000001870	Ltbp1
ENSMUSG00000036403		ENSMUSG00000083218		ENSMUSG00000010080		ENSMUSG00000033192	Lpcat2
ENSMUSG00000045876		ENSMUSG00000064380		ENSMUSG00000020483		ENSMUSG00000037994	Slc9b2
ENSMUSG00000046688		ENSMUSG00000042826		ENSMUSG00000028756		ENSMUSG00000026192	Atic
ENSMUSG00000025647		ENSMUSG00000046844		ENSMUSG00000030137		ENSMUSG00000039853	Trim14
ENSMUSG00000061740		ENSMUSG00000018381		ENSMUSG00000031374		ENSMUSG00000110235	Gm5086
ENSMUSG00000018042		ENSMUSG00000064363		ENSMUSG00000033316		ENSMUSG00000071203	Naip5
ENSMUSG00000053977		ENSMUSG00000041736		ENSMUSG00000037541		ENSMUSG00000079491	H2-T10
ENSMUSG00000028145		ENSMUSG00000026480		ENSMUSG00000044827		ENSMUSG00000097462	9530026P05Rik
ENSMUSG00000113836		ENSMUSG00000029478		ENSMUSG00000072762		ENSMUSG00000037992	Rara
ENSMUSG00000022817		ENSMUSG00002075987		ENSMUSG00000082292		ENSMUSG00000027375	Mal
ENSMUSG00000040852		ENSMUSG00000048612		ENSMUSG00000117465		ENSMUSG00000075266	Cenpw
ENSMUSG00000020473		ENSMUSG00000017724		ENSMUSG00000004609		ENSMUSG00000049511	Htr1b
ENSMUSG00000068130		ENSMUSG00000032280		ENSMUSG00000013584		ENSMUSG00000117613	Gm2629
ENSMUSG00000044576		ENSMUSG00000035919		ENSMUSG00000022212		ENSMUSG00000020638	Cmpk2
ENSMUSG00000033102		ENSMUSG00000025058		ENSMUSG00000027447		ENSMUSG00000057411	Antkmt
ENSMUSG00000046027		ENSMUSG00000033192		ENSMUSG00000031790		ENSMUSG00000030717	Nupr1
ENSMUSG00000038375		ENSMUSG00000021186		ENSMUSG00000052512		ENSMUSG00000038418	Egr1
ENSMUSG00000001870		ENSMUSG00000033149		ENSMUSG00000020331		ENSMUSG00000108616	Gm35040
ENSMUSG00000033192		ENSMUSG00000022883		ENSMUSG00000021136		ENSMUSG00000042826	Fgf11
ENSMUSG00000037994		ENSMUSG00000025764		ENSMUSG00000024076		ENSMUSG00000036565	Ttyh3
ENSMUSG00000026192		ENSMUSG00000078607		ENSMUSG00000032231		ENSMUSG00000056069	Otulinl
ENSMUSG00000039853		ENSMUSG00000095041		ENSMUSG00000040569		ENSMUSG00000031065	Cdk16
ENSMUSG00000110235		ENSMUSG00000015879		ENSMUSG00000041333		ENSMUSG00000000732	Icosl
ENSMUSG00000071203		ENSMUSG00000047307		ENSMUSG00000113440		ENSMUSG00000112810	Gm35101
ENSMUSG00000079491		ENSMUSG00000102232		ENSMUSG00000023341		ENSMUSG00000051236	Msrb3
ENSMUSG00000097462		ENSMUSG00000054640		ENSMUSG00000046719		ENSMUSG00000067586	S1pr3
ENSMUSG00000092624		ENSMUSG00000075020		ENSMUSG00000067684		ENSMUSG00000029602	Rasal1
ENSMUSG00000037992		ENSMUSG00000026628		ENSMUSG00000105047		ENSMUSG00000106093	Gm42722
ENSMUSG00000027375		ENSMUSG00000041120		ENSMUSG00000000983		ENSMUSG00000079434	Neu2
ENSMUSG00000075266		ENSMUSG00000048779		ENSMUSG00000022372		ENSMUSG00000024013	Fgd2
ENSMUSG00000049511		ENSMUSG00000030123		ENSMUSG00000024899		ENSMUSG00000032596	Uba7
ENSMUSG00000048521		ENSMUSG00000043301		ENSMUSG00000032717		ENSMUSG00000039809	Gabbr2
ENSMUSG00000117613		ENSMUSG00000028159		ENSMUSG00000058897		ENSMUSG00000026628	Atf3
ENSMUSG00000020638		ENSMUSG00000036502		ENSMUSG00000016349		ENSMUSG00000020101	Vsir
ENSMUSG00000057411		ENSMUSG00000053158		ENSMUSG00000020601		ENSMUSG00000035606	Ky
ENSMUSG00000030717		ENSMUSG00000028599		ENSMUSG00000022206		ENSMUSG00000078942	Naip6
ENSMUSG00000038418		ENSMUSG00000067297		ENSMUSG00000024087		ENSMUSG00000071713	Csf2rb
ENSMUSG00000108616		ENSMUSG00000074771		ENSMUSG00000025232		ENSMUSG00000002111	Spi1
ENSMUSG00000042826		ENSMUSG00000032101		ENSMUSG00000033361		ENSMUSG00000041736	Tspo
ENSMUSG00000036565		ENSMUSG00000038418		ENSMUSG00000039616		ENSMUSG00000086311	Gm12122
ENSMUSG00000056069		ENSMUSG00000035226		ENSMUSG00000075053		ENSMUSG00000054027	Nt5dc3
ENSMUSG00000031065		ENSMUSG00000030560		ENSMUSG00002075795		ENSMUSG00000027227	Sord
ENSMUSG00000000732		ENSMUSG00000025877		ENSMUSG00000011256		ENSMUSG00000109517	Gm44763
ENSMUSG00000112810		ENSMUSG00000019880		ENSMUSG00000028081		ENSMUSG00000028542	Slc6a9
ENSMUSG00000051236		ENSMUSG00000038630		ENSMUSG00000032101		ENSMUSG00000031101	Sash3
ENSMUSG00000067586		ENSMUSG00000062785		ENSMUSG00000041120		ENSMUSG00000041538	H2-Ob
ENSMUSG00000029602		ENSMUSG00000027663		ENSMUSG00000044921		ENSMUSG00000031264	Btk
ENSMUSG00000106093		ENSMUSG00000037992		ENSMUSG00000052142		ENSMUSG00000087620	5330434G04Rik
ENSMUSG00000079434		ENSMUSG00000024403		ENSMUSG00000053465		ENSMUSG00000037138	Aff3
ENSMUSG00000024013		ENSMUSG00000025647		ENSMUSG00000092274		ENSMUSG00000031897	Psmb10
ENSMUSG00000032596		ENSMUSG00000001166		ENSMUSG00000027296		ENSMUSG00000062209	Erbb4
ENSMUSG00000039809		ENSMUSG00000024013		ENSMUSG00000030592		ENSMUSG00000090461	Il22b
ENSMUSG00000026628		ENSMUSG00000022817		ENSMUSG00000040528		ENSMUSG00000060924	Csmd1
ENSMUSG00000020101		ENSMUSG00000020181		ENSMUSG00000040563		ENSMUSG00000001281	Itgb7
ENSMUSG00000035606		ENSMUSG00000032854		ENSMUSG00000061143		ENSMUSG00000024672	Ms4a7
ENSMUSG00000078942		ENSMUSG00000066129		ENSMUSG00000063234		ENSMUSG00000060147	Serpinb6a
ENSMUSG00000071713		ENSMUSG00000056529		ENSMUSG00000074748		ENSMUSG00000021136	Smoc1
ENSMUSG00000002111		ENSMUSG00000037225		ENSMUSG00000057841		ENSMUSG00000058070	Eml1
ENSMUSG00000041736		ENSMUSG00000045827		ENSMUSG00000020431		ENSMUSG00000063268	Parp10
ENSMUSG00000086311		ENSMUSG00000091722		ENSMUSG00000021256		ENSMUSG00000055489	Ano5
ENSMUSG00000102037		ENSMUSG00000046152		ENSMUSG00000022894		ENSMUSG00000028226	Mmp16
ENSMUSG00000054027		ENSMUSG00000065637		ENSMUSG00000047013		ENSMUSG00000028028	Alpk1
ENSMUSG00000027227		ENSMUSG00000055489		ENSMUSG00000000805		ENSMUSG00000036814	Slc6a20a
ENSMUSG00000109517		ENSMUSG00000097823		ENSMUSG00000022769		ENSMUSG00000021217	Tshz3
ENSMUSG00000028542		ENSMUSG00000018339		ENSMUSG00000022906		ENSMUSG00000046152	Fut10
ENSMUSG00000031101		ENSMUSG00000021217		ENSMUSG00000028885		ENSMUSG00000107215	Gm43197
ENSMUSG00000041538		ENSMUSG00000073274		ENSMUSG00000045216		ENSMUSG00000021277	Traf3
ENSMUSG00000031264		ENSMUSG00000010080		ENSMUSG00000050063		ENSMUSG00000060206	Zfp462
ENSMUSG00000087620		ENSMUSG00000069378		ENSMUSG00000058248		ENSMUSG00000018381	Abi3
ENSMUSG00000037138		ENSMUSG00000020437		ENSMUSG00000046574		ENSMUSG00000029843	Slc13a4
ENSMUSG00000031897		ENSMUSG00000022952		ENSMUSG00000001870		ENSMUSG00000098557	Kctd12
ENSMUSG00000062209		ENSMUSG00000028885		ENSMUSG00000026443		ENSMUSG00000045573	Penk
ENSMUSG00000090461		ENSMUSG00000035273		ENSMUSG00000029636		ENSMUSG00000114590	5930438M14Rik
ENSMUSG00000029468		ENSMUSG00000046688		ENSMUSG00000032548		ENSMUSG00000036402	Gng12
ENSMUSG00000060924		ENSMUSG00000044708		ENSMUSG00000048385		ENSMUSG00000109625	3110080E11Rik
ENSMUSG00000053318		ENSMUSG00000000732		ENSMUSG00000038602		ENSMUSG00000020814	Mxra7
ENSMUSG00000001281		ENSMUSG00000048304		ENSMUSG00000060441		ENSMUSG00000010080	Epn3
ENSMUSG00000024672		ENSMUSG00000027750				ENSMUSG00000048489	Depp1
ENSMUSG00000060147		ENSMUSG00000036872				ENSMUSG00000032548	Slco2a1
ENSMUSG00000020922		ENSMUSG00000113836				ENSMUSG00000103601	Gm18150
ENSMUSG00000021136		ENSMUSG00000035606				ENSMUSG00000016346	Kcnq2
ENSMUSG00000058070		ENSMUSG00000063268				ENSMUSG00000026638	Irf6
ENSMUSG00000059316		ENSMUSG00000076441				ENSMUSG00000035919	Bbs9
ENSMUSG00000063268		ENSMUSG00000090272				ENSMUSG00000047013	Fbxo41
ENSMUSG00000033191		ENSMUSG00000021277				ENSMUSG00000045827	Serpinb9
ENSMUSG00000055489		ENSMUSG00000108218				ENSMUSG00000008734	Gprc5b
ENSMUSG00000028226		ENSMUSG00000067998				ENSMUSG00000037295	Ldlrap1
ENSMUSG00000055676		ENSMUSG00000001870				ENSMUSG00000023927	Satb1
ENSMUSG00000068246		ENSMUSG00000016477				ENSMUSG00000020176	Grb10
ENSMUSG00000028028		ENSMUSG00000103642				ENSMUSG00000024486	Hbegf
ENSMUSG00000036814		ENSMUSG00000037217				ENSMUSG00000102232	Gm19035
ENSMUSG00000021217		ENSMUSG00000027227				ENSMUSG00000029070	Mxra8
ENSMUSG00000046152		ENSMUSG00000034993				ENSMUSG00000039232	Stx11
ENSMUSG00000107215		ENSMUSG00000060147				ENSMUSG00000056529	Ptafr
ENSMUSG00000021277		ENSMUSG00000063234				ENSMUSG00000032372	Plscr2
ENSMUSG00000060206		ENSMUSG00000051790				ENSMUSG00000076441	Ass1
ENSMUSG00000018381		ENSMUSG00000103793				ENSMUSG00000022216	Psme1
ENSMUSG00000029843		ENSMUSG00000041329				ENSMUSG00000069917	Hba-a2
ENSMUSG00000098557		ENSMUSG00000073940				ENSMUSG00000031520	Vegfc
ENSMUSG00000061969		ENSMUSG00000058070				ENSMUSG00000038070	Cntln
ENSMUSG00000061728		ENSMUSG00000032548				ENSMUSG00000090272	Mndal
ENSMUSG00000045573		ENSMUSG00000035004				ENSMUSG00000097006	9530082P21Rik
ENSMUSG00000114590		ENSMUSG00000038070				ENSMUSG00000028159	Dapp1
ENSMUSG00000039264		ENSMUSG00000030263				ENSMUSG00000030341	Tnfrsf1a
ENSMUSG00000036402		ENSMUSG00000113440				ENSMUSG00000047115	Fam221a
ENSMUSG00000109625		ENSMUSG00000026956				ENSMUSG00000043301	Kcnj6
ENSMUSG00000026227		ENSMUSG00000052525				ENSMUSG00000020140	Lgr5
ENSMUSG00000020814		ENSMUSG00000008734				ENSMUSG00000040536	Necab1
ENSMUSG00000000440		ENSMUSG00000103601				ENSMUSG00000041390	Mdfic
ENSMUSG00000010080		ENSMUSG00000027669				ENSMUSG00000065637	Gm26397
ENSMUSG00000048489		ENSMUSG00000024736				ENSMUSG00000044783	Hjurp
ENSMUSG00000052749		ENSMUSG00000037174				ENSMUSG00000032101	Ddx25
ENSMUSG00000032548		ENSMUSG00000013033				ENSMUSG00000001131	Timp1
ENSMUSG00000103601		ENSMUSG00000064341				ENSMUSG00000021676	Iqgap2
ENSMUSG00000016346		ENSMUSG00000054626				ENSMUSG00000025877	Hk3
ENSMUSG00000026638		ENSMUSG00000026192				ENSMUSG00000022952	Runx1
ENSMUSG00000035919		ENSMUSG00000113186				ENSMUSG00000051067	Lingo3
ENSMUSG00000097428		ENSMUSG00000101111				ENSMUSG00000018339	Gpx3
ENSMUSG00000047013		ENSMUSG00000116735				ENSMUSG00000040606	Kazn
ENSMUSG00000045827		ENSMUSG00000028167				ENSMUSG00000011171	Vipr2
ENSMUSG00000026305		ENSMUSG00000037653				ENSMUSG00000021280	Exoc3l4
ENSMUSG00000008734		ENSMUSG00000086324				ENSMUSG00000066129	Kndc1
ENSMUSG00000037295		ENSMUSG00000026094				ENSMUSG00000035226	Rims4
ENSMUSG00000023927		ENSMUSG00000046230				ENSMUSG00000058586	Serhl
ENSMUSG00000020176		ENSMUSG00000026463				ENSMUSG00000014776	Nol3
ENSMUSG00000024486		ENSMUSG00000072763				ENSMUSG00000052525	Spdya
ENSMUSG00000004043		ENSMUSG00000033102				ENSMUSG00000113186	A330076C08Rik
ENSMUSG00000102232		ENSMUSG00000044667				ENSMUSG00000049556	Lingo1
ENSMUSG00000029070		ENSMUSG00000026638				ENSMUSG00000028167	Bdh2
ENSMUSG00000039232		ENSMUSG00000072774				ENSMUSG00000022311	Csmd3
ENSMUSG00000049685		ENSMUSG00000067996				ENSMUSG00000067071	Hes6
ENSMUSG00000023066		ENSMUSG00000037138				ENSMUSG00000021186	Fbln5
ENSMUSG00000056529		ENSMUSG00000071064				ENSMUSG00000089715	Cbx6
ENSMUSG00000032372		ENSMUSG00000029471				ENSMUSG00000016534	Lamp2
ENSMUSG00000076441		ENSMUSG00000051111				ENSMUSG00000053199	Arhgap20
ENSMUSG00000022216		ENSMUSG00000064451				ENSMUSG00000034993	Vat1
ENSMUSG00000069917		ENSMUSG00000047013				ENSMUSG00000040724	Kcna2
ENSMUSG00000031520		ENSMUSG00000038811				ENSMUSG00000019832	Rab32
ENSMUSG00000038070		ENSMUSG00000050556				ENSMUSG00000022894	Adamts5
ENSMUSG00000097295		ENSMUSG00000020431				ENSMUSG00000054717	Hmgb2
ENSMUSG00000090272		ENSMUSG00000064370				ENSMUSG00000020181	Nav3
ENSMUSG00000097006		ENSMUSG00000041596				ENSMUSG00000104157	Gm38101
ENSMUSG00000028159		ENSMUSG00000022372				ENSMUSG00000092528	Nlrp1c-ps
ENSMUSG00000030341		ENSMUSG00000025534				ENSMUSG00000116597	Gm536
ENSMUSG00000034115		ENSMUSG00000029204				ENSMUSG00000042873	Lhfpl4
ENSMUSG00000031755		ENSMUSG00000045679				ENSMUSG00000033149	Phldb2
ENSMUSG00000047115		ENSMUSG00000030745				ENSMUSG00000038630	Zkscan16
ENSMUSG00000053040		ENSMUSG00000034275				ENSMUSG00000019487	Trip10
ENSMUSG00000043301		ENSMUSG00000094421				ENSMUSG00000036502	Tmem255a
ENSMUSG00000020140		ENSMUSG00000041390				ENSMUSG00000028885	Smpdl3b
ENSMUSG00000102634		ENSMUSG00000085795				ENSMUSG00000049872	Calhm5
ENSMUSG00000040536		ENSMUSG00000074872				ENSMUSG00000069170	Adgrv1
ENSMUSG00000041390		ENSMUSG00000029455				ENSMUSG00000077167	Gm24119
ENSMUSG00000065637		ENSMUSG00000040675				ENSMUSG00000104420	E230020A03Rik
ENSMUSG00000044783		ENSMUSG00000019874				ENSMUSG00000103088	Pcdhgb6
ENSMUSG00000032101		ENSMUSG00000035274				ENSMUSG00000019929	Dcn
ENSMUSG00000001131		ENSMUSG00000028226				ENSMUSG00000027750	Postn
ENSMUSG00000021676		ENSMUSG00000055053				ENSMUSG00000048779	P2ry6
ENSMUSG00000025877		ENSMUSG00000105922				ENSMUSG00000001576	Ergic1
ENSMUSG00000022952		ENSMUSG00000109625				ENSMUSG00000065353	Snora73b
ENSMUSG00000051067		ENSMUSG00000026365				ENSMUSG00000033594	Spata2l
ENSMUSG00000018339		ENSMUSG00000037362				ENSMUSG00000048304	Slitrk3
ENSMUSG00000040606		ENSMUSG00000006411				ENSMUSG00000075020	Mir670hg
ENSMUSG00000011171		ENSMUSG00000073528				ENSMUSG00000082292	Gm12250
ENSMUSG00000097194		ENSMUSG00000047976				ENSMUSG00000029622	Arpc1b
ENSMUSG00000021280		ENSMUSG00000020044				ENSMUSG00000029455	Aldh2
ENSMUSG00000066129		ENSMUSG00000097619				ENSMUSG00000057606	Colq
ENSMUSG00000035226		ENSMUSG00000064344				ENSMUSG00000021470	Ercc6l2
ENSMUSG00000058586		ENSMUSG00000029636				ENSMUSG00000056267	Cep70
ENSMUSG00000014776		ENSMUSG00000030172				ENSMUSG00000034164	Emid1
ENSMUSG00000072676		ENSMUSG00000024899				ENSMUSG00000046844	Vat1l
ENSMUSG00000052525		ENSMUSG00000068130				ENSMUSG00000064380	Gm26448
ENSMUSG00000113186		ENSMUSG00000014776				ENSMUSG00000023367	Tmem176a
ENSMUSG00000049556		ENSMUSG00000056427				ENSMUSG00000041143	Tmco4
ENSMUSG00000028559		ENSMUSG00000090461				ENSMUSG00000041180	Hectd2
ENSMUSG00000004552		ENSMUSG00000073421				ENSMUSG00000073528	Gm10530
ENSMUSG00000028167		ENSMUSG00000051498				ENSMUSG00000046230	Vps13a
ENSMUSG00000022311		ENSMUSG00000018042				ENSMUSG00000029478	Ncor2
ENSMUSG00000067071		ENSMUSG00000032372				ENSMUSG00000037174	Elf2
ENSMUSG00000021186		ENSMUSG00000040606				ENSMUSG00000071847	Apcdd1
ENSMUSG00000089715		ENSMUSG00000016346				ENSMUSG00000074748	Atxn7l3b
ENSMUSG00000016534		ENSMUSG00000030717				ENSMUSG00000067297	Ifit1bl2
ENSMUSG00000030094		ENSMUSG00000028655				ENSMUSG00000064246	Chil1
ENSMUSG00000053199		ENSMUSG00000044576				ENSMUSG00000032415	Ube2cbp
ENSMUSG00000086290		ENSMUSG00000026380				ENSMUSG00000042763	Maneal
ENSMUSG00000034993		ENSMUSG00000031065				ENSMUSG00000045201	Lrrc3b
ENSMUSG00000040724		ENSMUSG00000097462				ENSMUSG00000074749	Kiz
ENSMUSG00000019832		ENSMUSG00000087620				ENSMUSG00000034795	Ccdc122
ENSMUSG00000022894		ENSMUSG00000050071				ENSMUSG00000024403	Atp6v1g2
ENSMUSG00000054717		ENSMUSG00000072115				ENSMUSG00000038156	Spon1
ENSMUSG00000020181		ENSMUSG00000030218				ENSMUSG00000074872	Ctxn2
ENSMUSG00000104157		ENSMUSG00000032714				ENSMUSG00000064345	mt-Nd2
ENSMUSG00000092528		ENSMUSG00000116597				ENSMUSG00000048200	Cracr2b
ENSMUSG00000038213		ENSMUSG00000020848				ENSMUSG00000027399	Il1a
ENSMUSG00000116597		ENSMUSG00000026220				ENSMUSG00000039616	Mocos
ENSMUSG00000042873		ENSMUSG00000018554				ENSMUSG00000044708	Kcnj10
ENSMUSG00000033149		ENSMUSG00000016918				ENSMUSG00000097619	4833422M21Rik
ENSMUSG00000005547		ENSMUSG00000033594				ENSMUSG00000001166	Oas1c
ENSMUSG00000038630		ENSMUSG00000061740				ENSMUSG00000042734	Ttc9
ENSMUSG00000019487		ENSMUSG00000047228				ENSMUSG00000033361	Prrg3
ENSMUSG00000036502		ENSMUSG00000050821				ENSMUSG00000108218	Olfr1372-ps1
ENSMUSG00000059089		ENSMUSG00000021242				ENSMUSG00000020620	Abca8b
ENSMUSG00000028885		ENSMUSG00000039765				ENSMUSG00000032280	Tle3
ENSMUSG00000049872		ENSMUSG00000021280				ENSMUSG00000083218	Gm16425
ENSMUSG00000069170		ENSMUSG00000075437				ENSMUSG00000038811	Gngt2
ENSMUSG00000077167		ENSMUSG00000080365				ENSMUSG00000027663	Zmat3
ENSMUSG00000104420		ENSMUSG00000031897				ENSMUSG00000030123	Plxnd1
ENSMUSG00000102312		ENSMUSG00000022177				ENSMUSG00000025058	Tasl
ENSMUSG00000103088		ENSMUSG00000092021				ENSMUSG00000005087	Cd44
ENSMUSG00000019929		ENSMUSG00000001604				ENSMUSG00000092021	Gbp11
ENSMUSG00000027750		ENSMUSG00000074865				ENSMUSG00000030263	Irag2
ENSMUSG00000045664		ENSMUSG00000114590				ENSMUSG00000117822	Eef1a1-ps1
ENSMUSG00000048779		ENSMUSG00000104420				ENSMUSG00000064363	mt-Nd4
ENSMUSG00000001576		ENSMUSG00000067586				ENSMUSG00000040675	Mthfd1l
ENSMUSG00000065353		ENSMUSG00000024691				ENSMUSG00000103793	Pcdhga6
ENSMUSG00000033594		ENSMUSG00000030341				ENSMUSG00000024691	Fam111a
ENSMUSG00000048304		ENSMUSG00000019832				ENSMUSG00000064344	mt-Tm
ENSMUSG00000075020		ENSMUSG00000020228				ENSMUSG00000043279	Trim56
ENSMUSG00000082292		ENSMUSG00000109517				ENSMUSG00000033308	Dpyd
ENSMUSG00000029622		ENSMUSG00000000214				ENSMUSG00000037217	Syn1
ENSMUSG00000029455		ENSMUSG00000016534				ENSMUSG00000022883	Robo1
ENSMUSG00000057606		ENSMUSG00000030806				ENSMUSG00000031639	Tlr3
ENSMUSG00000041134		ENSMUSG00000032415				ENSMUSG00000026043	Col3a1
ENSMUSG00000021470		ENSMUSG00000022421				ENSMUSG00000032854	Ugt8a
ENSMUSG00000029428		ENSMUSG00000051212				ENSMUSG00000046410	Kcnk6
ENSMUSG00000062861		ENSMUSG00000022216				ENSMUSG00000028655	Mfsd2a
ENSMUSG00000056267		ENSMUSG00000097006				ENSMUSG00000023232	Serinc2
ENSMUSG00000035637		ENSMUSG00000023232				ENSMUSG00000073421	H2-Ab1
ENSMUSG00000109814		ENSMUSG00000043279				ENSMUSG00000102808	5430420F09Rik
ENSMUSG00000034164		ENSMUSG00000102440				ENSMUSG00000054280	Prr14l
ENSMUSG00000030905		ENSMUSG00000026043				ENSMUSG00000027296	Itpka
ENSMUSG00000046844		ENSMUSG00000020140				ENSMUSG00000045679	Pqlc3
ENSMUSG00000064380		ENSMUSG00000025290				ENSMUSG00000035004	Igsf6
ENSMUSG00000024642		ENSMUSG00000074749				ENSMUSG00000022838	Eaf2
ENSMUSG00000054920		ENSMUSG00000069806				ENSMUSG00000056427	Slit3
ENSMUSG00000023367		ENSMUSG00000057606				ENSMUSG00000029471	Camkk2
ENSMUSG00000102267		ENSMUSG00000112276				ENSMUSG00000094942	Gm3604
ENSMUSG00000041143		ENSMUSG00000105286				ENSMUSG00000088493	Gm24401
ENSMUSG00000041180		ENSMUSG00000024846				ENSMUSG00000038518	Jarid2
ENSMUSG00000073528		ENSMUSG00000006014				ENSMUSG00000021256	Vash1
ENSMUSG00000079445		ENSMUSG00000029622				ENSMUSG00000026475	Rgs16
ENSMUSG00000046230		ENSMUSG00000021676				ENSMUSG00000025104	Hdgfl3
ENSMUSG00000058454		ENSMUSG00000041453				ENSMUSG00000022372	Sla
ENSMUSG00000023495		ENSMUSG00000056267				ENSMUSG00000032717	Mdfi
ENSMUSG00000029478		ENSMUSG00000064246				ENSMUSG00000067455	H4c11
ENSMUSG00000037174		ENSMUSG00000021136				ENSMUSG00000030172	Erc1
ENSMUSG00000071847		ENSMUSG00000038521				ENSMUSG00000033579	Fa2h
ENSMUSG00000074748		ENSMUSG00000069170				ENSMUSG00000047976	Kcna1
ENSMUSG00000113701		ENSMUSG00000040152				ENSMUSG00000069378	Prdm6
ENSMUSG00000067297		ENSMUSG00000111971				ENSMUSG00000041596	Nlrp5-ps
ENSMUSG00000064246		ENSMUSG00000024677				ENSMUSG00000029120	Ppp2r2c
ENSMUSG00000032415		ENSMUSG00000023159				ENSMUSG00000104093	A330015K06Rik
ENSMUSG00000047992		ENSMUSG00000033579				ENSMUSG00000073940	Hbb-bt
ENSMUSG00000042763		ENSMUSG00000005087				ENSMUSG00000027188	Pamr1
ENSMUSG00000045201		ENSMUSG00000031351				ENSMUSG00000046157	Tmem229b
ENSMUSG00000074749		ENSMUSG00000076439				ENSMUSG00000024677	Ms4a6b
ENSMUSG00000034795		ENSMUSG00000049265				ENSMUSG00000076439	Mog
ENSMUSG00000024403		ENSMUSG00000022838				ENSMUSG00000039765	Cc2d2a
ENSMUSG00000038156		ENSMUSG00000033361				ENSMUSG00000095041	ENSMUSG00000095041
ENSMUSG00000074872		ENSMUSG00000057378				ENSMUSG00000020437	Myo1g
ENSMUSG00000064345		ENSMUSG00000025478				ENSMUSG00000049265	Kcnk3
ENSMUSG00000038622		ENSMUSG00000024462				ENSMUSG00000069806	Cacng7
ENSMUSG00000048200		ENSMUSG00000049097				ENSMUSG00000020431	Adcy1
ENSMUSG00000041688		ENSMUSG00000055067				ENSMUSG00000055945	Prr18
ENSMUSG00000027399		ENSMUSG00000021470				ENSMUSG00000051615	Rap2a
ENSMUSG00000039616		ENSMUSG00000022894				ENSMUSG00000062785	Kcnc3
ENSMUSG00000044708		ENSMUSG00000029120				ENSMUSG00000013033	Adgrl1
ENSMUSG00000097619		ENSMUSG00000060594				ENSMUSG00000026380	Tfcp2l1
ENSMUSG00000104572		ENSMUSG00000049872				ENSMUSG00000001604	Tcea3
ENSMUSG00000043964		ENSMUSG00000038900				ENSMUSG00000051790	Nlgn2
ENSMUSG00000001166		ENSMUSG00000044349				ENSMUSG00000049097	Ankrd34a
ENSMUSG00000059791		ENSMUSG00000054280				ENSMUSG00000105922	Gm42769
ENSMUSG00000042734		ENSMUSG00000054027				ENSMUSG00000024736	Tmem132a
ENSMUSG00000033361		ENSMUSG00000046442				ENSMUSG00000021242	Npc2
ENSMUSG00000108218		ENSMUSG00000051067				ENSMUSG00000054626	Xlr
ENSMUSG00000020620		ENSMUSG00000047810				ENSMUSG00000026094	Stk17b
ENSMUSG00000017418		ENSMUSG00000025104				ENSMUSG00000030745	Il21r
ENSMUSG00000032280		ENSMUSG00000003657				ENSMUSG00000029204	Rhoh
ENSMUSG00000083218		ENSMUSG00000049556				ENSMUSG00000105286	Gm43140
ENSMUSG00000040387		ENSMUSG00000074748				ENSMUSG00000030218	Mgp
ENSMUSG00000056413		ENSMUSG00000055945				ENSMUSG00000041329	Atp1b2
ENSMUSG00000038811		ENSMUSG00000039616				ENSMUSG00000006494	Pdk1
ENSMUSG00000027663		ENSMUSG00000058248				ENSMUSG00000006014	Prg4
ENSMUSG00000079057		ENSMUSG00000031520				ENSMUSG00000042198	Chchd7
ENSMUSG00000085527		ENSMUSG00000048249				ENSMUSG00000055067	Smyd3
ENSMUSG00000030123		ENSMUSG00000006204				ENSMUSG00000056215	Lrguk
ENSMUSG00000032656		ENSMUSG00000104157				ENSMUSG00000073565	Prr16
ENSMUSG00000026283		ENSMUSG00000017167				ENSMUSG00000047810	Ccdc88b
ENSMUSG00000025058		ENSMUSG00000060441				ENSMUSG00000086324	Gm15564
ENSMUSG00000005087		ENSMUSG00000057455				ENSMUSG00000029636	Wasf3
ENSMUSG00000020464		ENSMUSG00000055994				ENSMUSG00000018554	Ybx2
ENSMUSG00000024675		ENSMUSG00000044783				ENSMUSG00000033220	Rac2
ENSMUSG00000092021		ENSMUSG00000029070				ENSMUSG00000046169	Adamts6
ENSMUSG00000050530		ENSMUSG00000042873				ENSMUSG00000060441	Trim5
ENSMUSG00000060512		ENSMUSG00000027737				ENSMUSG00000063234	Gpr84
ENSMUSG00000098206		ENSMUSG00000023367				ENSMUSG00000033316	Galnt9
ENSMUSG00000030263		ENSMUSG00000030678				ENSMUSG00000050071	Bex1
ENSMUSG00000117822		ENSMUSG00000033220				ENSMUSG00000064341	mt-Nd1
ENSMUSG00000064363		ENSMUSG00000034795				ENSMUSG00000006204	Cdcp3
ENSMUSG00000040675		ENSMUSG00000046157				ENSMUSG00000040152	Thbs1
ENSMUSG00000046761		ENSMUSG00000103749				ENSMUSG00000026463	Atp2b4
ENSMUSG00000103793		ENSMUSG00000009216				ENSMUSG00000051212	Gpr183
ENSMUSG00000100111		ENSMUSG00000020620				ENSMUSG00000025290	Rps24
ENSMUSG00000024691		ENSMUSG00000027188				ENSMUSG00000020848	Doc2b
ENSMUSG00000064344		ENSMUSG00000038793				ENSMUSG00000036306	Lzts1
ENSMUSG00000043279		ENSMUSG00000001281				ENSMUSG00000038521	C1s1
ENSMUSG00000033308		ENSMUSG00000046169				ENSMUSG00000020044	Timp3
ENSMUSG00000037533		ENSMUSG00000003617				ENSMUSG00000072115	Ang
ENSMUSG00000037217		ENSMUSG00000036403				ENSMUSG00000031351	Zfp185
ENSMUSG00000022883		ENSMUSG00000038156				ENSMUSG00000106753	Gm43230
ENSMUSG00000031639		ENSMUSG00000034164				ENSMUSG00000064371	mt-Tt
ENSMUSG00000036853		ENSMUSG00000049511				ENSMUSG00000040147	Maob
ENSMUSG00000070847		ENSMUSG00000056069				ENSMUSG00000020990	Cdkl1
ENSMUSG00000026043		ENSMUSG00000024486				ENSMUSG00000040569	Slc26a7
ENSMUSG00000032854		ENSMUSG00000102808				ENSMUSG00000104508	Gm37735
ENSMUSG00000027009		ENSMUSG00000105703				ENSMUSG00000021583	Erap1
ENSMUSG00000032122		ENSMUSG00000027230				ENSMUSG00000058248	Kcnh1
ENSMUSG00000046410		ENSMUSG00000020990				ENSMUSG00000023159	Psg29
ENSMUSG00000028655		ENSMUSG00002076601				ENSMUSG00000003657	Calb2
ENSMUSG00000023232		ENSMUSG00000042734				ENSMUSG00000031170	Slc38a5
ENSMUSG00000073421		ENSMUSG00000088493				ENSMUSG00000064451	Snora23
ENSMUSG00000102808		ENSMUSG00000031374				ENSMUSG00000033327	Tnxb
ENSMUSG00000054280		ENSMUSG00000026223				ENSMUSG00000030806	Stx1b
ENSMUSG00000027296		ENSMUSG00000058586				ENSMUSG00000045288	Ush1g
ENSMUSG00000032440		ENSMUSG00000070570				ENSMUSG00000096146	Kcnj11
ENSMUSG00000045679		ENSMUSG00000092035				ENSMUSG00000047419	Cmya5
ENSMUSG00000024789		ENSMUSG00000079481				ENSMUSG00000090622	A930033H14Rik
ENSMUSG00000031681		ENSMUSG00000052504				ENSMUSG00000111971	Gm48678
ENSMUSG00000035004		ENSMUSG00000036402				ENSMUSG00000050556	Kcnb1
ENSMUSG00000022838		ENSMUSG00000117822				ENSMUSG00000050821	Fam131a
ENSMUSG00000056427		ENSMUSG00000032561				ENSMUSG00000034041	Lyl1
ENSMUSG00000085379		ENSMUSG00000031502				ENSMUSG00000013584	Aldh1a2
ENSMUSG00000029471		ENSMUSG00000027315				ENSMUSG00000055053	Nfic
ENSMUSG00000019961		ENSMUSG00000046410				ENSMUSG00000027230	Creb3l1
ENSMUSG00000029470		ENSMUSG00000036306				ENSMUSG00000034275	Igsf9b
ENSMUSG00000037411		ENSMUSG00000096146				ENSMUSG00000051111	Sv2c
ENSMUSG00000094942		ENSMUSG00000051236				ENSMUSG00000078920	Ifi47
ENSMUSG00000088493		ENSMUSG00000033316				ENSMUSG00000064370	mt-Cytb
ENSMUSG00000038518		ENSMUSG00000040569				ENSMUSG00000075437	Gm11681
ENSMUSG00000016262		ENSMUSG00000104093				ENSMUSG00000035273	Hpse
ENSMUSG00000021256		ENSMUSG00000033308				ENSMUSG00000024087	Cyp1b1
ENSMUSG00000026475		ENSMUSG00000025794				ENSMUSG00000022421	Nptxr
ENSMUSG00000046160		ENSMUSG00000028028				ENSMUSG00000009216	Fam163b
ENSMUSG00000069892		ENSMUSG00000034792				ENSMUSG00000021069	Pygl
ENSMUSG00000001663		ENSMUSG00000067455				ENSMUSG00000046719	Nxph3
ENSMUSG00000048148		ENSMUSG00000092090				ENSMUSG00000026365	Cfh
ENSMUSG00000061758		ENSMUSG00000067071				ENSMUSG00000111389	Gm39465
ENSMUSG00000025104		ENSMUSG00000020866				ENSMUSG00000041453	Rpl21
ENSMUSG00000021134		ENSMUSG00000056215				ENSMUSG00000044244	Il20rb
ENSMUSG00000071005		ENSMUSG00000025404				ENSMUSG00000047228	A2ml1
ENSMUSG00000025747		ENSMUSG00000054717				ENSMUSG00000034792	Gna15
ENSMUSG00000038604		ENSMUSG00000111389				ENSMUSG00000026728	Vim
ENSMUSG00000022372		ENSMUSG00000026475				ENSMUSG00000080365	Gm25776
ENSMUSG00000076609		ENSMUSG00000073565				ENSMUSG00000055994	Nod2
ENSMUSG00000029550		ENSMUSG00000023927				ENSMUSG00000097493	9930014A18Rik
ENSMUSG00000047090		ENSMUSG00000015599				ENSMUSG00000017167	Cntnap1
ENSMUSG00000028970		ENSMUSG00000045201				ENSMUSG00000069919	Hba-a1
ENSMUSG00000032717		ENSMUSG00000040084				ENSMUSG00000031239	Itm2a
ENSMUSG00000067455		ENSMUSG00000031170				ENSMUSG00002076809	7SK
ENSMUSG00000049555		ENSMUSG00000021256				ENSMUSG00000030678	Maz
ENSMUSG00000030172		ENSMUSG00000021583				ENSMUSG00000112276	5033421B08Rik
ENSMUSG00000033579		ENSMUSG00000021069				ENSMUSG00000051498	Tlr6
ENSMUSG00000047976		ENSMUSG00000054889				ENSMUSG00000052305	Hbb-bs
ENSMUSG00000069378		ENSMUSG00000094942				ENSMUSG00000016918	Sulf1
ENSMUSG00000022505		ENSMUSG00000078920				ENSMUSG00000031374	Zfp92
ENSMUSG00000020327		ENSMUSG00000044244				ENSMUSG00000025232	Hexa
ENSMUSG00000041596		ENSMUSG00000019487				ENSMUSG00000104339	C130089K02Rik
ENSMUSG00000029120		ENSMUSG00000108616				ENSMUSG00000053465	Hs6st3
ENSMUSG00000104093		ENSMUSG00000001576				ENSMUSG00000040084	Bub1b
ENSMUSG00000027555		ENSMUSG00000047419				ENSMUSG00000048249	Crebrf
ENSMUSG00000034732		ENSMUSG00000040147				ENSMUSG00000038602	Slc35f1
ENSMUSG00000073940		ENSMUSG00000048154				ENSMUSG00000094421	Gm20778
ENSMUSG00000082570		ENSMUSG00000020814				ENSMUSG00000033213	AA467197
ENSMUSG00000000305		ENSMUSG00000042198				ENSMUSG00000020601	Trib2
ENSMUSG00000021974		ENSMUSG00000041143				ENSMUSG00000027624	Epb41l1
ENSMUSG00000027188		ENSMUSG00000042763				ENSMUSG00000031790	Mmp15
ENSMUSG00000045498		ENSMUSG00000048200				ENSMUSG00000025478	Dpysl4
ENSMUSG00000046157		ENSMUSG00000106753				ENSMUSG00000030411	Nova2
ENSMUSG00000059182		ENSMUSG00000051615				ENSMUSG00000092035	Peg10
ENSMUSG00000024677		ENSMUSG00000035735				ENSMUSG00000102440	Pcdhga9
ENSMUSG00000006611		ENSMUSG00000057411				ENSMUSG00000024665	Fads2
ENSMUSG00000028391		ENSMUSG00000034041				ENSMUSG00000031502	Col4a1
ENSMUSG00000040181		ENSMUSG00000104339				ENSMUSG00000026223	Itm2c
ENSMUSG00000076439		ENSMUSG00000053199				ENSMUSG00000054889	Dsp
ENSMUSG00000039765		ENSMUSG00000026728				ENSMUSG00000036594	H2-Aa
ENSMUSG00000095041		ENSMUSG00000041180				ENSMUSG00000067998	Bpifb9a
ENSMUSG00000018566		ENSMUSG00000027624				ENSMUSG00000067996	Bpifb9b
ENSMUSG00000020437		ENSMUSG00000057841				ENSMUSG00000019874	Fabp7
ENSMUSG00000049265		ENSMUSG00000038518				ENSMUSG00000035274	Tpbg
ENSMUSG00000103310		ENSMUSG00000104508				ENSMUSG00000037362	Ccn3
ENSMUSG00000069806		ENSMUSG00000040724				ENSMUSG00000000214	Th
ENSMUSG00000020431		ENSMUSG00000031639				ENSMUSG00000044349	Snhg11
ENSMUSG00000055945		ENSMUSG00000071847				ENSMUSG00000046442	Ppm1e
ENSMUSG00000051615		ENSMUSG00000025232				ENSMUSG00000027737	Slc7a11
ENSMUSG00000062785		ENSMUSG00000033871				ENSMUSG00000105703	Gm43305
ENSMUSG00000013033		ENSMUSG00000006494				ENSMUSG00002076601	Scarna13
ENSMUSG00000026380		ENSMUSG00000097493				ENSMUSG00000070570	Slc17a7
ENSMUSG00000041921		ENSMUSG00000090622				ENSMUSG00000025794	Rpl14
ENSMUSG00000047146		ENSMUSG00000032717				ENSMUSG00000092090	Gm3294
ENSMUSG00000001604		ENSMUSG00000045288				ENSMUSG00000020866	Cacna1g
ENSMUSG00000051790		ENSMUSG00000041625				ENSMUSG00000015599	Ttbk1
ENSMUSG00000022360						ENSMUSG00000035735	Dagla
ENSMUSG00000049097						ENSMUSG00000057841	Rpl32
ENSMUSG00000035764
ENSMUSG00000087514
ENSMUSG00000105922
ENSMUSG00000029084
ENSMUSG00000039410
ENSMUSG00000024736
ENSMUSG00000021242
ENSMUSG00000036353
ENSMUSG00000041471
ENSMUSG00000047945
ENSMUSG00000054626
ENSMUSG00000105818
ENSMUSG00000002032
ENSMUSG00000026094
ENSMUSG00000039936
ENSMUSG00000030745
ENSMUSG00000029204
ENSMUSG00000061186
ENSMUSG00000105286
ENSMUSG00000037868
ENSMUSG00000030218
ENSMUSG00000041329
ENSMUSG00000006494
ENSMUSG00000006014
ENSMUSG00000042198
ENSMUSG00000055067
ENSMUSG00000070471
ENSMUSG00000025938
ENSMUSG00000056215
ENSMUSG00000024246
ENSMUSG00000034998
ENSMUSG00000078866
ENSMUSG00000061311
ENSMUSG00000073565
ENSMUSG00000060336
ENSMUSG00000052942
ENSMUSG00000029925
ENSMUSG00000047810
ENSMUSG00000086324
ENSMUSG00000033174
ENSMUSG00000025762
ENSMUSG00000029636
ENSMUSG00000018554
ENSMUSG00000033220
ENSMUSG00000046169
ENSMUSG00000095742
ENSMUSG00000027956
ENSMUSG00000060441
ENSMUSG00000063234
ENSMUSG00000033316
ENSMUSG00000026471
ENSMUSG00000041794
ENSMUSG00000050071
ENSMUSG00000064341
ENSMUSG00000009112
ENSMUSG00000006204
ENSMUSG00000013766
ENSMUSG00000034957
ENSMUSG00000040152
ENSMUSG00000116888
ENSMUSG00000009394
ENSMUSG00000026463
ENSMUSG00000051212
ENSMUSG00000031221
ENSMUSG00000025290
ENSMUSG00000087301
ENSMUSG00000115912
ENSMUSG00000002996
ENSMUSG00000024349
ENSMUSG00000040751
ENSMUSG00000072591
ENSMUSG00000100586
ENSMUSG00000086040
ENSMUSG00000071722
ENSMUSG00000020848
ENSMUSG00000036306
ENSMUSG00000038521
ENSMUSG00000020044
ENSMUSG00000028042
ENSMUSG00000068270
ENSMUSG00000050822
ENSMUSG00000072066
ENSMUSG00000072115
ENSMUSG00000068663
ENSMUSG00000057003
ENSMUSG00000031351
ENSMUSG00000049721
ENSMUSG00000020723
ENSMUSG00000106753
ENSMUSG00000033948
ENSMUSG00000021594
ENSMUSG00000026109
ENSMUSG00000021102
ENSMUSG00000026315
ENSMUSG00000020610
ENSMUSG00000039013
ENSMUSG00000102423
ENSMUSG00000027376
ENSMUSG00000109532
ENSMUSG00000032062
ENSMUSG00000064371
ENSMUSG00000021090
ENSMUSG00000022969
ENSMUSG00000020865
ENSMUSG00000040147
ENSMUSG00000041460
ENSMUSG00000020990
ENSMUSG00000062542
ENSMUSG00000040569
ENSMUSG00000104508
ENSMUSG00000026558
ENSMUSG00000030283
ENSMUSG00000115263
ENSMUSG00000107667
ENSMUSG00000021583
ENSMUSG00000028194
ENSMUSG00000022415
ENSMUSG00000058248
ENSMUSG00000023159
ENSMUSG00000038456
ENSMUSG00000104149
ENSMUSG00000040502
ENSMUSG00000003657
ENSMUSG00000031170
ENSMUSG00000074578
ENSMUSG00000064451
ENSMUSG00000042501
ENSMUSG00000035948
ENSMUSG00000052912
ENSMUSG00000107226
ENSMUSG00000033327
ENSMUSG00000026028
ENSMUSG00000030806
ENSMUSG00000041594
ENSMUSG00000027004
ENSMUSG00000032265
ENSMUSG00000045288
ENSMUSG00000059555
ENSMUSG00000025270
ENSMUSG00000096146
ENSMUSG00000047419
ENSMUSG00000031758
ENSMUSG00000090622
ENSMUSG00000039063
ENSMUSG00000111971
ENSMUSG00000072235
ENSMUSG00000022376
ENSMUSG00000021886
ENSMUSG00000009535
ENSMUSG00000040213
ENSMUSG00000050556
ENSMUSG00000050821
ENSMUSG00000058966
ENSMUSG00000034041
ENSMUSG00000013584
ENSMUSG00000055053
ENSMUSG00000027230
ENSMUSG00000034275
ENSMUSG00000044164
ENSMUSG00000051111
ENSMUSG00000078920
ENSMUSG00000087611
ENSMUSG00000064370
ENSMUSG00000029759
ENSMUSG00000063065
ENSMUSG00000075437
ENSMUSG00000025964
ENSMUSG00000022468
ENSMUSG00000035273
ENSMUSG00000022935
ENSMUSG00000044345
ENSMUSG00000024087
ENSMUSG00000025815
ENSMUSG00000091764
ENSMUSG00000103442
ENSMUSG00000021115
ENSMUSG00000025937
ENSMUSG00000087590
ENSMUSG00000031620
ENSMUSG00000022421
ENSMUSG00000025323
ENSMUSG00000027848
ENSMUSG00000040987
ENSMUSG00000035778
ENSMUSG00000031508
ENSMUSG00000040254
ENSMUSG00000009216
ENSMUSG00000041731
ENSMUSG00000001025
ENSMUSG00000021069
ENSMUSG00000046598
ENSMUSG00000046807
ENSMUSG00000060149
ENSMUSG00000113831
ENSMUSG00000046719
ENSMUSG00000097057
ENSMUSG00000062345
ENSMUSG00000028861
ENSMUSG00000026365
ENSMUSG00000028995
ENSMUSG00000031467
ENSMUSG00000034612
ENSMUSG00000078532
ENSMUSG00000111389
ENSMUSG00000019823
ENSMUSG00000021281
ENSMUSG00000069662
ENSMUSG00000092277
ENSMUSG00000068566
ENSMUSG00000037465
ENSMUSG00000039375
ENSMUSG00000041453
ENSMUSG00000044244
ENSMUSG00000047228
ENSMUSG00000115810
ENSMUSG00000033467
ENSMUSG00000034792
ENSMUSG00000026875
ENSMUSG00000078161
ENSMUSG00000026202
ENSMUSG00000026728
ENSMUSG00000020380
ENSMUSG00000040669
ENSMUSG00000035992
ENSMUSG00000063160
ENSMUSG00000080365
ENSMUSG00000025213
ENSMUSG00000030494
ENSMUSG00000041559
ENSMUSG00000028382
ENSMUSG00000055994
ENSMUSG00000097493
ENSMUSG00000026668
ENSMUSG00000031297
ENSMUSG00000017167
ENSMUSG00000040812
ENSMUSG00000045912
ENSMUSG00000031970
ENSMUSG00000046240
ENSMUSG00000074166
ENSMUSG00000021474
ENSMUSG00000025203
ENSMUSG00000069919
ENSMUSG00000022748
ENSMUSG00000026726
ENSMUSG00000031239
ENSMUSG00002076809
ENSMUSG00000020150
ENSMUSG00000030678
ENSMUSG00000041797
ENSMUSG00000085457
ENSMUSG00000103332
ENSMUSG00000112276
ENSMUSG00000115306
ENSMUSG00000019822
ENSMUSG00000051498
ENSMUSG00000052305
ENSMUSG00000016918
ENSMUSG00000044707
ENSMUSG00000002274
ENSMUSG00000001334
ENSMUSG00000061533
ENSMUSG00000039046
ENSMUSG00000096696
ENSMUSG00000036432
ENSMUSG00000020591
ENSMUSG00000031374
ENSMUSG00000025232
ENSMUSG00000056938
ENSMUSG00000104339
ENSMUSG00000108077
ENSMUSG00000029191
ENSMUSG00000038264
ENSMUSG00000053465
ENSMUSG00000099681
ENSMUSG00000049287
ENSMUSG00000025202
ENSMUSG00000040084
ENSMUSG00000016946
ENSMUSG00000025192
ENSMUSG00000027849
ENSMUSG00000029185
ENSMUSG00000034255
ENSMUSG00000017670
ENSMUSG00000022833
ENSMUSG00000025013
ENSMUSG00000118219
ENSMUSG00000037860
ENSMUSG00000054863
ENSMUSG00000047747
ENSMUSG00000048249
ENSMUSG00000031934
ENSMUSG00000038602
ENSMUSG00000045053
ENSMUSG00000019489
ENSMUSG00000020527
ENSMUSG00000027884
ENSMUSG00000060240
ENSMUSG00000094421
ENSMUSG00000033213
ENSMUSG00000020601
ENSMUSG00000027624
ENSMUSG00000025812
ENSMUSG00000027011
ENSMUSG00000065411
ENSMUSG00000031790
ENSMUSG00000005410
ENSMUSG00000051652
ENSMUSG00000057191
ENSMUSG00000031824
ENSMUSG00000030093
ENSMUSG00000097060
ENSMUSG00000025478
ENSMUSG00000030411
ENSMUSG00000107312
ENSMUSG00000025154
ENSMUSG00000092035
ENSMUSG00000033214
ENSMUSG00000035478
ENSMUSG00000038618
ENSMUSG00000008305
ENSMUSG00000030220
ENSMUSG00000021890
ENSMUSG00000073077
ENSMUSG00000097157
ENSMUSG00000102440
ENSMUSG00000020794
ENSMUSG00000028927
ENSMUSG00000035910
ENSMUSG00000038143
ENSMUSG00000031772
ENSMUSG00000024665
ENSMUSG00000031662
ENSMUSG00000004952
ENSMUSG00000031109
ENSMUSG00000042010
ENSMUSG00000062778
ENSMUSG00000108526
ENSMUSG00000031502
ENSMUSG00000042581
ENSMUSG00000027074
ENSMUSG00000020653
ENSMUSG00000022971
ENSMUSG00000105326
ENSMUSG00000008496
ENSMUSG00000026223
ENSMUSG00000054889
ENSMUSG00000102650
ENSMUSG00000036594
ENSMUSG00000066894
ENSMUSG00000050310
ENSMUSG00000022837
ENSMUSG00000053332
ENSMUSG00000024579
ENSMUSG00000000409
ENSMUSG00000006527
ENSMUSG00000086496
ENSMUSG00000040596
ENSMUSG00000103834
ENSMUSG00000032036
ENSMUSG00000085241
ENSMUSG00000020891
ENSMUSG00000028954
ENSMUSG00000047875
ENSMUSG00000050122
ENSMUSG00000039234

## Sheet: SC YvM
DESeq2		edgeR		Cuffdiff		Consensus	Name
ENSMUSG00000041828		ENSMUSG00000041828		ENSMUSG00000000290		ENSMUSG00000041828	Abca8a
ENSMUSG00000037994		ENSMUSG00000115529		ENSMUSG00000001467		ENSMUSG00000037994	Slc9b2
ENSMUSG00000115529		ENSMUSG00000046764		ENSMUSG00000001506		ENSMUSG00000115529	9630013A20Rik
ENSMUSG00000046805		ENSMUSG00000026697		ENSMUSG00000002341		ENSMUSG00000046805	Mpeg1
ENSMUSG00000050121		ENSMUSG00000030577		ENSMUSG00000002831		ENSMUSG00000050121	Opalin
ENSMUSG00000076439		ENSMUSG00000048411		ENSMUSG00000004707		ENSMUSG00000076439	Mog
ENSMUSG00000027858		ENSMUSG00000046805		ENSMUSG00000005397		ENSMUSG00000027858	Tspan2
ENSMUSG00000045498		ENSMUSG00000037708		ENSMUSG00000006457		ENSMUSG00000045498	Pcdhb3
ENSMUSG00000046764		ENSMUSG00000050121		ENSMUSG00000006517		ENSMUSG00000046764	A530053G22Rik
ENSMUSG00000048411		ENSMUSG00000093930		ENSMUSG00000006542		ENSMUSG00000048411	Gm597
ENSMUSG00000051599		ENSMUSG00000056569		ENSMUSG00000006782		ENSMUSG00000051599	Pcdhb2
ENSMUSG00000026697		ENSMUSG00000076439		ENSMUSG00000007122		ENSMUSG00000026697	Myoc
ENSMUSG00000037708		ENSMUSG00000073418		ENSMUSG00000007480		ENSMUSG00000037708	Spag6
ENSMUSG00000051242		ENSMUSG00000040170		ENSMUSG00000007877		ENSMUSG00000051242	Pcdhb9
ENSMUSG00000096948		ENSMUSG00000027858		ENSMUSG00000010021		ENSMUSG00000096948	Gm4221
ENSMUSG00000051486		ENSMUSG00000004707		ENSMUSG00000010122		ENSMUSG00000051486	Pcdhb11
ENSMUSG00000114189		ENSMUSG00000114189		ENSMUSG00000010461		ENSMUSG00000114189	9330199G10Rik
ENSMUSG00000040170		ENSMUSG00000030789		ENSMUSG00000011263		ENSMUSG00000040170	Fmo2
ENSMUSG00000020150		ENSMUSG00000037994		ENSMUSG00000015243		ENSMUSG00000020150	Gamt
ENSMUSG00000030577		ENSMUSG00000026043		ENSMUSG00000017493		ENSMUSG00000030577	Cd22
ENSMUSG00000006542		ENSMUSG00000096948		ENSMUSG00000017817		ENSMUSG00000006542	Prkag3
ENSMUSG00000004707		ENSMUSG00000019232		ENSMUSG00000017868		ENSMUSG00000004707	Ly9
ENSMUSG00000063687		ENSMUSG00000051599		ENSMUSG00000018217		ENSMUSG00000063687	Pcdhb5
ENSMUSG00000093930		ENSMUSG00000005397		ENSMUSG00000018654		ENSMUSG00000093930	Hmgcs1
ENSMUSG00000044468		ENSMUSG00000092447		ENSMUSG00000019232		ENSMUSG00000044468	Tent5c
ENSMUSG00000030789		ENSMUSG00000006542		ENSMUSG00000019874		ENSMUSG00000030789	Itgax
ENSMUSG00000073418		ENSMUSG00000051486		ENSMUSG00000020053		ENSMUSG00000073418	C4b
ENSMUSG00000005397		ENSMUSG00000020053		ENSMUSG00000020150		ENSMUSG00000005397	Nid1
ENSMUSG00000056569		ENSMUSG00000051242		ENSMUSG00000020387		ENSMUSG00000056569	Mpz
ENSMUSG00000036887		ENSMUSG00000045498		ENSMUSG00000020953		ENSMUSG00000036887	C1qa
ENSMUSG00000050335		ENSMUSG00000020150		ENSMUSG00000021070		ENSMUSG00000050335	Lgals3
ENSMUSG00000029307		ENSMUSG00000038642		ENSMUSG00000021091		ENSMUSG00000029307	Dmp1
ENSMUSG00000019232		ENSMUSG00000052229		ENSMUSG00000021696		ENSMUSG00000019232	Etnppl
ENSMUSG00000026043		ENSMUSG00000033579		ENSMUSG00000021903		ENSMUSG00000026043	Col3a1
ENSMUSG00000024300		ENSMUSG00000104572		ENSMUSG00000022025		ENSMUSG00000024300	Myo1f
ENSMUSG00000103332		ENSMUSG00000037625		ENSMUSG00000022231		ENSMUSG00000103332	Pcdhga2
ENSMUSG00000033579		ENSMUSG00000031425		ENSMUSG00000022351		ENSMUSG00000033579	Fa2h
ENSMUSG00000031425		ENSMUSG00000068129		ENSMUSG00000022817		ENSMUSG00000031425	Plp1
ENSMUSG00000038642		ENSMUSG00000076609		ENSMUSG00000023992		ENSMUSG00000038642	Ctss
ENSMUSG00000079293		ENSMUSG00000090675		ENSMUSG00000024411		ENSMUSG00000079293	Clec7a
ENSMUSG00000097789		ENSMUSG00000026285		ENSMUSG00000024471		ENSMUSG00000097789	Gm2115
ENSMUSG00000103472		ENSMUSG00000111971		ENSMUSG00000024529		ENSMUSG00000103472	Pcdhga7
ENSMUSG00000004266		ENSMUSG00000027375		ENSMUSG00000025083		ENSMUSG00000004266	Ptpn6
ENSMUSG00000037625		ENSMUSG00000050335		ENSMUSG00000025479		ENSMUSG00000037625	Cldn11
ENSMUSG00000045689		ENSMUSG00000025479		ENSMUSG00000025784		ENSMUSG00000045689	Pcdhb4
ENSMUSG00000043943		ENSMUSG00000117733		ENSMUSG00000025950		ENSMUSG00000043943	Naalad2
ENSMUSG00000030406		ENSMUSG00000047945		ENSMUSG00000026043		ENSMUSG00000030406	Gipr
ENSMUSG00000073590		ENSMUSG00000042436		ENSMUSG00000026285		ENSMUSG00000073590	3222401L13Rik
ENSMUSG00000027669		ENSMUSG00000029307		ENSMUSG00000026675		ENSMUSG00000027669	Gnb4
ENSMUSG00000042834		ENSMUSG00000071068		ENSMUSG00000026697		ENSMUSG00000042834	Nrep
ENSMUSG00000041460		ENSMUSG00000079293		ENSMUSG00000026879		ENSMUSG00000041460	Cacna2d4
ENSMUSG00000036905		ENSMUSG00000010830		ENSMUSG00000026950		ENSMUSG00000036905	C1qb
ENSMUSG00000020053		ENSMUSG00000036887		ENSMUSG00000027022		ENSMUSG00000020053	Igf1
ENSMUSG00000069516		ENSMUSG00000030406		ENSMUSG00000027375		ENSMUSG00000069516	Lyz2
ENSMUSG00000028859		ENSMUSG00000032854		ENSMUSG00000027559		ENSMUSG00000028859	Csf3r
ENSMUSG00000010830		ENSMUSG00000095609		ENSMUSG00000027858		ENSMUSG00000010830	Kdelr3
ENSMUSG00000018654		ENSMUSG00000063687		ENSMUSG00000027875		ENSMUSG00000018654	Ikzf1
ENSMUSG00000064267		ENSMUSG00000019874		ENSMUSG00000028339		ENSMUSG00000064267	Hvcn1
ENSMUSG00000111971		ENSMUSG00000115422		ENSMUSG00000028362		ENSMUSG00000111971	Gm48678
ENSMUSG00000000290		ENSMUSG00000052688		ENSMUSG00000028364		ENSMUSG00000000290	Itgb2
ENSMUSG00000027375		ENSMUSG00000031604		ENSMUSG00000028581		ENSMUSG00000027375	Mal
ENSMUSG00000104572		ENSMUSG00000038173		ENSMUSG00000029307		ENSMUSG00000104572	Fbxw23
ENSMUSG00000052229		ENSMUSG00000111765		ENSMUSG00000029482		ENSMUSG00000052229	Gpr17
ENSMUSG00000047945		ENSMUSG00000049721		ENSMUSG00000029675		ENSMUSG00000047945	Marcksl1
ENSMUSG00000026395		ENSMUSG00000010021		ENSMUSG00000029816		ENSMUSG00000026395	Ptprc
ENSMUSG00000042436		ENSMUSG00000072676		ENSMUSG00000030116		ENSMUSG00000042436	Mfap4
ENSMUSG00000052688		ENSMUSG00000044468		ENSMUSG00000030168		ENSMUSG00000052688	Rab7b
ENSMUSG00000019874		ENSMUSG00000042834		ENSMUSG00000030220		ENSMUSG00000019874	Fabp7
ENSMUSG00000092447		ENSMUSG00000069516		ENSMUSG00000030399		ENSMUSG00000092447	Gm7696
ENSMUSG00000010021		ENSMUSG00000103332		ENSMUSG00000030406		ENSMUSG00000010021	Kif19a
ENSMUSG00000036896		ENSMUSG00000041596		ENSMUSG00000030669		ENSMUSG00000036896	C1qc
ENSMUSG00000117733		ENSMUSG00000004552		ENSMUSG00000030672		ENSMUSG00000117733	ENSMUSG00000117733
ENSMUSG00000025479		ENSMUSG00000027875		ENSMUSG00000030789		ENSMUSG00000025479	Cyp2e1
ENSMUSG00000032122		ENSMUSG00000043943		ENSMUSG00000031111		ENSMUSG00000032122	Slc37a2
ENSMUSG00000068129		ENSMUSG00000045689		ENSMUSG00000031239		ENSMUSG00000068129	Cst7
ENSMUSG00000029695		ENSMUSG00000058258		ENSMUSG00000031604		ENSMUSG00000029695	Aass
ENSMUSG00000035237		ENSMUSG00000041460		ENSMUSG00000031775		ENSMUSG00000035237	Lcat
ENSMUSG00000021697		ENSMUSG00000113186		ENSMUSG00000031972		ENSMUSG00000021697	Depdc1b
ENSMUSG00000115422		ENSMUSG00000036905		ENSMUSG00000032018		ENSMUSG00000115422	4930452G13Rik
ENSMUSG00000010461		ENSMUSG00000044338		ENSMUSG00000032033		ENSMUSG00000010461	Eya4
ENSMUSG00000022488		ENSMUSG00000073590		ENSMUSG00000032193		ENSMUSG00000022488	Nckap1l
ENSMUSG00000007480		ENSMUSG00000087278		ENSMUSG00000032327		ENSMUSG00000007480	Mc5r
ENSMUSG00000097415		ENSMUSG00000028364		ENSMUSG00000032334		ENSMUSG00000097415	AU020206
ENSMUSG00000002341		ENSMUSG00000022351		ENSMUSG00000032358		ENSMUSG00000002341	Ncan
ENSMUSG00000032854		ENSMUSG00000024440		ENSMUSG00000032484		ENSMUSG00000032854	Ugt8a
ENSMUSG00000038173		ENSMUSG00000001506		ENSMUSG00000032854		ENSMUSG00000038173	Enpp6
ENSMUSG00000049721		ENSMUSG00000022025		ENSMUSG00000033327		ENSMUSG00000049721	Gal3st1
ENSMUSG00000087278		ENSMUSG00000002341		ENSMUSG00000033579		ENSMUSG00000087278	A930006I01Rik
ENSMUSG00000072676		ENSMUSG00000026395		ENSMUSG00000033906		ENSMUSG00000072676	Tmem254
ENSMUSG00000020120		ENSMUSG00000000290		ENSMUSG00000035202		ENSMUSG00000020120	Plek
ENSMUSG00000031604		ENSMUSG00000010461		ENSMUSG00000036887		ENSMUSG00000031604	Msmo1
ENSMUSG00000111765		ENSMUSG00000029816		ENSMUSG00000036896		ENSMUSG00000111765	Gm10635
ENSMUSG00000113186		ENSMUSG00000044726		ENSMUSG00000036905		ENSMUSG00000113186	A330076C08Rik
ENSMUSG00000039328		ENSMUSG00000018217		ENSMUSG00000037625		ENSMUSG00000039328	Rnf122
ENSMUSG00000026303		ENSMUSG00000001467		ENSMUSG00000037664		ENSMUSG00000026303	Mlph
ENSMUSG00000058258		ENSMUSG00000040298		ENSMUSG00000038147		ENSMUSG00000058258	Idi1
ENSMUSG00000044749		ENSMUSG00000099696		ENSMUSG00000038418		ENSMUSG00000044749	Abca6
ENSMUSG00000052353		ENSMUSG00000021670		ENSMUSG00000038642		ENSMUSG00000052353	Cemip
ENSMUSG00000015950		ENSMUSG00000092624		ENSMUSG00000039328		ENSMUSG00000015950	Ncf1
ENSMUSG00000033060		ENSMUSG00000032033		ENSMUSG00000039457		ENSMUSG00000033060	Lmo7
ENSMUSG00000057337		ENSMUSG00000057337		ENSMUSG00000039801		ENSMUSG00000057337	Chst3
ENSMUSG00000027875		ENSMUSG00000039328		ENSMUSG00000040170		ENSMUSG00000027875	Hmgcs2
ENSMUSG00000103793		ENSMUSG00000105948		ENSMUSG00000040552		ENSMUSG00000103793	Pcdhga6
ENSMUSG00000023992		ENSMUSG00000064267		ENSMUSG00000040759		ENSMUSG00000023992	Trem2
ENSMUSG00000104093		ENSMUSG00000002831		ENSMUSG00000041515		ENSMUSG00000104093	A330015K06Rik
ENSMUSG00000000682		ENSMUSG00000024300		ENSMUSG00000041596		ENSMUSG00000000682	Cd52
ENSMUSG00000090675		ENSMUSG00000028859		ENSMUSG00000041828		ENSMUSG00000090675	Olfr111
ENSMUSG00000029816		ENSMUSG00000058454		ENSMUSG00000042254		ENSMUSG00000029816	Gpnmb
ENSMUSG00000030223		ENSMUSG00000026303		ENSMUSG00000042436		ENSMUSG00000030223	Ptpro
ENSMUSG00000071068		ENSMUSG00000030124		ENSMUSG00000042834		ENSMUSG00000071068	Treml2
ENSMUSG00000026285		ENSMUSG00000031775		ENSMUSG00000043943		ENSMUSG00000026285	Pdcd1
ENSMUSG00000028364		ENSMUSG00000015243		ENSMUSG00000044338		ENSMUSG00000028364	Tnc
ENSMUSG00000026177		ENSMUSG00000036896		ENSMUSG00000044468		ENSMUSG00000026177	Slc11a1
ENSMUSG00000031170		ENSMUSG00000050377		ENSMUSG00000044726		ENSMUSG00000031170	Slc38a5
ENSMUSG00000103144		ENSMUSG00000028362		ENSMUSG00000044938		ENSMUSG00000103144	Pcdhga1
ENSMUSG00000055723		ENSMUSG00000114479		ENSMUSG00000045502		ENSMUSG00000055723	Rras2
ENSMUSG00000076609		ENSMUSG00000000682		ENSMUSG00000046160		ENSMUSG00000076609	Igkc
ENSMUSG00000104494		ENSMUSG00000044043		ENSMUSG00000046275		ENSMUSG00000104494	Gm37111
ENSMUSG00000099696		ENSMUSG00000039457		ENSMUSG00000046764		ENSMUSG00000099696	2900052N01Rik
ENSMUSG00000024440		ENSMUSG00000031111		ENSMUSG00000046805		ENSMUSG00000024440	Pcdh12
ENSMUSG00000030116		ENSMUSG00000021697		ENSMUSG00000047945		ENSMUSG00000030116	Mfap5
ENSMUSG00000027792		ENSMUSG00000020120		ENSMUSG00000048070		ENSMUSG00000027792	Bche
ENSMUSG00000015243		ENSMUSG00000023992		ENSMUSG00000048411		ENSMUSG00000015243	Abca1
ENSMUSG00000044726		ENSMUSG00000085773		ENSMUSG00000049721		ENSMUSG00000044726	Erich5
ENSMUSG00000020143		ENSMUSG00000029695		ENSMUSG00000050121		ENSMUSG00000020143	Dock2
ENSMUSG00000045502		ENSMUSG00000033581		ENSMUSG00000050335		ENSMUSG00000045502	Hcar2
ENSMUSG00000021281		ENSMUSG00000104264		ENSMUSG00000050600		ENSMUSG00000021281	Tnfaip2
ENSMUSG00000009356		ENSMUSG00000027669		ENSMUSG00000050666		ENSMUSG00000009356	Lpo
ENSMUSG00000092312		ENSMUSG00000044719		ENSMUSG00000051747		ENSMUSG00000032033	Barx2
ENSMUSG00000032033		ENSMUSG00000104093		ENSMUSG00000052229		ENSMUSG00000030124	Lag3
ENSMUSG00000030124		ENSMUSG00000000154		ENSMUSG00000052468		ENSMUSG00000041596	Nlrp5-ps
ENSMUSG00000041596		ENSMUSG00000033060		ENSMUSG00000052688		ENSMUSG00000039457	Ppl
ENSMUSG00000039457		ENSMUSG00000097415		ENSMUSG00000053198		ENSMUSG00000022887	Masp1
ENSMUSG00000022887		ENSMUSG00000025784		ENSMUSG00000055723		ENSMUSG00000030798	Cd37
ENSMUSG00000030798		ENSMUSG00000097789		ENSMUSG00000056071		ENSMUSG00000046186	Cd109
ENSMUSG00000046186		ENSMUSG00000006782		ENSMUSG00000056220		ENSMUSG00000040552	C3ar1
ENSMUSG00000040552		ENSMUSG00000004266		ENSMUSG00000056328		ENSMUSG00000095609	Gm21188
ENSMUSG00000095609		ENSMUSG00000026109		ENSMUSG00000056569		ENSMUSG00000055027	Smyd1
ENSMUSG00000055027		ENSMUSG00000104674		ENSMUSG00000056895		ENSMUSG00000021594	Srd5a1
ENSMUSG00000021594		ENSMUSG00000007480		ENSMUSG00000057003		ENSMUSG00000035910	Dcdc2a
ENSMUSG00000035910		ENSMUSG00000018654		ENSMUSG00000057337		ENSMUSG00000021273	Fdft1
ENSMUSG00000021273		ENSMUSG00000098132		ENSMUSG00000058385		ENSMUSG00000038540	Tmc3
ENSMUSG00000038540		ENSMUSG00000028339		ENSMUSG00000058454		ENSMUSG00000052942	Glis3
ENSMUSG00000052942		ENSMUSG00000046337		ENSMUSG00000058818		ENSMUSG00000040759	Cmtm5
ENSMUSG00000040759		ENSMUSG00000103483		ENSMUSG00000059498		ENSMUSG00000022351	Sqle
ENSMUSG00000022351		ENSMUSG00000026879		ENSMUSG00000060981		ENSMUSG00000048865	Arhgap30
ENSMUSG00000048865		ENSMUSG00000038540		ENSMUSG00000061723		ENSMUSG00000006522	Itih3
ENSMUSG00000006522		ENSMUSG00000018927		ENSMUSG00000061816		ENSMUSG00000021670	Hmgcr
ENSMUSG00000021670		ENSMUSG00000027792		ENSMUSG00000067149		ENSMUSG00000044338	Aplnr
ENSMUSG00000044338		ENSMUSG00000035237		ENSMUSG00000067780		ENSMUSG00000040061	Plcb2
ENSMUSG00000040061		ENSMUSG00000000982		ENSMUSG00000068129		ENSMUSG00000067780	Pi15
ENSMUSG00000067780		ENSMUSG00000050666		ENSMUSG00000069516		ENSMUSG00000103483	Gm20162
ENSMUSG00000103483		ENSMUSG00000024066		ENSMUSG00000070423		ENSMUSG00000018927	Ccl6
ENSMUSG00000018927		ENSMUSG00000030116		ENSMUSG00000072676		ENSMUSG00000000732	Icosl
ENSMUSG00000000732		ENSMUSG00000040759		ENSMUSG00000073411		ENSMUSG00000031111	Igsf1
ENSMUSG00000031111		ENSMUSG00000067780		ENSMUSG00000073418		ENSMUSG00000058454	Dhcr7
ENSMUSG00000058454		ENSMUSG00000103793		ENSMUSG00000074622		ENSMUSG00000026109	Tmeff2
ENSMUSG00000026109		ENSMUSG00000103472		ENSMUSG00000074634		ENSMUSG00000026614	Slc30a10
ENSMUSG00000026614		ENSMUSG00000081557		ENSMUSG00000075053		ENSMUSG00000050377	Il31ra
ENSMUSG00000050377		ENSMUSG00000070423		ENSMUSG00000076439		ENSMUSG00000018774	Cd68
ENSMUSG00000018774		ENSMUSG00000066842		ENSMUSG00000076441		ENSMUSG00000000154	Slc22a18
ENSMUSG00000000154		ENSMUSG00000006522		ENSMUSG00000076563		ENSMUSG00000044043	Pcdhb14
ENSMUSG00000044043		ENSMUSG00000030168		ENSMUSG00000076564		ENSMUSG00000046337	Fam178b
ENSMUSG00000046337		ENSMUSG00000031170		ENSMUSG00000076609		ENSMUSG00000028339	Col15a1
ENSMUSG00000028339		ENSMUSG00000025270		ENSMUSG00000079235		ENSMUSG00000050063	Klk6
ENSMUSG00000050063		ENSMUSG00000027547		ENSMUSG00000079293		ENSMUSG00000040298	Btbd16
ENSMUSG00000040298		ENSMUSG00000021281		ENSMUSG00000079588		ENSMUSG00000050666	Vstm4
ENSMUSG00000050666		ENSMUSG00000011263		ENSMUSG00000081557		ENSMUSG00000114479	Gm49375
ENSMUSG00000114479		ENSMUSG00000020143		ENSMUSG00000087278		ENSMUSG00000033581	Igf2bp2
ENSMUSG00000023078		ENSMUSG00000050063		ENSMUSG00000088185		ENSMUSG00000002831	Plin4
ENSMUSG00000033581		ENSMUSG00000052353		ENSMUSG00000090122		ENSMUSG00000033906	Zdhhc15
ENSMUSG00000002831		ENSMUSG00000021903		ENSMUSG00000090877		ENSMUSG00000037278	Tmem97
ENSMUSG00000033906		ENSMUSG00000024529		ENSMUSG00000091971		ENSMUSG00000009376	Met
ENSMUSG00000037278		ENSMUSG00000026938		ENSMUSG00000093930		ENSMUSG00000016256	Ctsz
ENSMUSG00000009376		ENSMUSG00000031502		ENSMUSG00000095041		ENSMUSG00000033880	Lgals3bp
ENSMUSG00000016256		ENSMUSG00000058818		ENSMUSG00000096422		ENSMUSG00000001467	Cyp51
ENSMUSG00000033880		ENSMUSG00000053198		ENSMUSG00000096464		ENSMUSG00000059498	Fcgr3
ENSMUSG00000001467		ENSMUSG00000104494		ENSMUSG00000096833		ENSMUSG00000015852	Fcrls
ENSMUSG00000059498		ENSMUSG00000035004		ENSMUSG00000097415		ENSMUSG00000035004	Igsf6
ENSMUSG00000015852		ENSMUSG00000021273		ENSMUSG00000098132		ENSMUSG00000061132	Blnk
ENSMUSG00000039518		ENSMUSG00000073409		ENSMUSG00000099696		ENSMUSG00000098132	Rassf10
ENSMUSG00000035004		ENSMUSG00000009670		ENSMUSG00000104674		ENSMUSG00000004552	Ctse
ENSMUSG00000061132		ENSMUSG00000055027		ENSMUSG00000106225		ENSMUSG00000022025	Cnmd
ENSMUSG00000098132		ENSMUSG00000059498		ENSMUSG00000110633		ENSMUSG00000051678	Pcdhb6
ENSMUSG00000004552		ENSMUSG00000051678		ENSMUSG00000111765		ENSMUSG00000026778	Prkcq
ENSMUSG00000022025		ENSMUSG00000030616		ENSMUSG00000113186		ENSMUSG00000033308	Dpyd
ENSMUSG00000051678		ENSMUSG00000040552		ENSMUSG00000114189		ENSMUSG00000092624	Gm3654
ENSMUSG00000026778		ENSMUSG00000024411		ENSMUSG00000115422		ENSMUSG00000104674	Gm42756
ENSMUSG00000033308		ENSMUSG00000047497		ENSMUSG00000117465		ENSMUSG00000024066	Xdh
ENSMUSG00000092624		ENSMUSG00000021509		ENSMUSG00000119584		ENSMUSG00000030616	Sytl2
ENSMUSG00000104674		ENSMUSG00000028581		ENSMUSG00000119838		ENSMUSG00000068798	Rap1a
ENSMUSG00000024066		ENSMUSG00000032358		ENSMUSG00000018774		ENSMUSG00000058818	Pirb
ENSMUSG00000054005		ENSMUSG00000035910		ENSMUSG00000020475		ENSMUSG00000100837	1700063D05Rik
ENSMUSG00000030616		ENSMUSG00000030862		ENSMUSG00000024087		ENSMUSG00000000628	Hk2
ENSMUSG00000068798		ENSMUSG00000032122		ENSMUSG00000026395		ENSMUSG00000028362	Tnfsf8
ENSMUSG00000058818		ENSMUSG00000029661		ENSMUSG00000026822		ENSMUSG00000018217	Pmp22
ENSMUSG00000100837		ENSMUSG00000022887		ENSMUSG00000030577		ENSMUSG00000046410	Kcnk6
ENSMUSG00000000628		ENSMUSG00000054889		ENSMUSG00000030579		ENSMUSG00000104264	Gm18529
ENSMUSG00000028362		ENSMUSG00000048065		ENSMUSG00000035093		ENSMUSG00000031264	Btk
ENSMUSG00000018217		ENSMUSG00000015852		ENSMUSG00000038007		ENSMUSG00000004609	Cd33
ENSMUSG00000046410		ENSMUSG00000022817		ENSMUSG00000041889		ENSMUSG00000022665	Ccdc80
ENSMUSG00000104264		ENSMUSG00000031264		ENSMUSG00000043753		ENSMUSG00000047497	Adamts12
ENSMUSG00000031264		ENSMUSG00000075053		ENSMUSG00000044519		ENSMUSG00000044519	Zfp488
ENSMUSG00000004609		ENSMUSG00000059908		ENSMUSG00000049929		ENSMUSG00000000805	Car4
ENSMUSG00000022665		ENSMUSG00000015355		ENSMUSG00000055945		ENSMUSG00000046598	Bdh1
ENSMUSG00000047497		ENSMUSG00000057003		ENSMUSG00000055978		ENSMUSG00000105948	Gm43089
ENSMUSG00000044519		ENSMUSG00000022797		ENSMUSG00000063234		ENSMUSG00000030862	Cpxm2
ENSMUSG00000000805		ENSMUSG00000064325		ENSMUSG00000064325		ENSMUSG00000025784	Clec3b
ENSMUSG00000031494		ENSMUSG00000029675		ENSMUSG00000073902		ENSMUSG00000066842	Hmcn1
ENSMUSG00000024924		ENSMUSG00000017493		ENSMUSG00000092624		ENSMUSG00000031502	Col4a1
ENSMUSG00000046598		ENSMUSG00000027376		ENSMUSG00000000982		ENSMUSG00000006782	Cnp
ENSMUSG00000105948		ENSMUSG00000026675		ENSMUSG00000005148		ENSMUSG00000041515	Irf8
ENSMUSG00000030862		ENSMUSG00000043740		ENSMUSG00000020644		ENSMUSG00000038007	Acer2
ENSMUSG00000025784		ENSMUSG00000022488		ENSMUSG00000022900		ENSMUSG00000043458	Pcdhb12
ENSMUSG00000066842		ENSMUSG00000025716		ENSMUSG00000031349		ENSMUSG00000031775	Pllp
ENSMUSG00000031502		ENSMUSG00000030223		ENSMUSG00000034533		ENSMUSG00000049744	Arhgap15
ENSMUSG00000006782		ENSMUSG00000021070		ENSMUSG00000036181		ENSMUSG00000021703	Serinc5
ENSMUSG00000097307		ENSMUSG00000026177		ENSMUSG00000043924		ENSMUSG00000028150	Rorc
ENSMUSG00000041515		ENSMUSG00000068798		ENSMUSG00000044951		ENSMUSG00000032540	Abhd5
ENSMUSG00000038007		ENSMUSG00000018774		ENSMUSG00000045294		ENSMUSG00000049929	Lpar4
ENSMUSG00000043458		ENSMUSG00000055723		ENSMUSG00000051652		ENSMUSG00000034573	Ptpn13
ENSMUSG00000031775		ENSMUSG00000006574		ENSMUSG00000056423		ENSMUSG00000026656	Fcgr2b
ENSMUSG00000049744		ENSMUSG00000009376		ENSMUSG00000058258		ENSMUSG00000044176	Spink10
ENSMUSG00000021703		ENSMUSG00000017868		ENSMUSG00000004655		ENSMUSG00000009670	Tex11
ENSMUSG00000028150		ENSMUSG00000051663		ENSMUSG00000027792		ENSMUSG00000064325	Hhip
ENSMUSG00000032540		ENSMUSG00000032327		ENSMUSG00000029826		ENSMUSG00000024529	Lox
ENSMUSG00000049929		ENSMUSG00000027605		ENSMUSG00000040694		ENSMUSG00000020399	Havcr2
ENSMUSG00000053977		ENSMUSG00000063234		ENSMUSG00000051627		ENSMUSG00000056220	Pla2g4a
ENSMUSG00000034573		ENSMUSG00000103144		ENSMUSG00000054675		ENSMUSG00000070423	Olfr558
ENSMUSG00000026656		ENSMUSG00000041515		ENSMUSG00000095609		ENSMUSG00000020901	Pik3r5
ENSMUSG00000044176		ENSMUSG00000032540		ENSMUSG00000107134		ENSMUSG00000037031	Tspan15
ENSMUSG00000009670		ENSMUSG00000061132		ENSMUSG00000018893		ENSMUSG00000017868	Sgk2
ENSMUSG00000064325		ENSMUSG00000000732		ENSMUSG00000020583		ENSMUSG00000030168	Adipor2
ENSMUSG00000024529		ENSMUSG00000000805		ENSMUSG00000025013		ENSMUSG00000109598	Gm36356
ENSMUSG00000020399		ENSMUSG00000108218		ENSMUSG00000026208		ENSMUSG00000029490	Mfsd7a
ENSMUSG00000056220		ENSMUSG00000037664		ENSMUSG00000026303		ENSMUSG00000048065	Cyb5r2
ENSMUSG00000070423		ENSMUSG00000009545		ENSMUSG00000027435		ENSMUSG00000011263	Exoc3l2
ENSMUSG00000020901		ENSMUSG00000021703		ENSMUSG00000030340		ENSMUSG00000038147	Cd84
ENSMUSG00000037031		ENSMUSG00000015950		ENSMUSG00000034457		ENSMUSG00000022817	Itgb5
ENSMUSG00000017868		ENSMUSG00000021696		ENSMUSG00000050377		ENSMUSG00000022371	Col14a1
ENSMUSG00000030168		ENSMUSG00000055866		ENSMUSG00000052942		ENSMUSG00000085773	Gm16233
ENSMUSG00000109598		ENSMUSG00000021594		ENSMUSG00000053411		ENSMUSG00000044719	E230025N22Rik
ENSMUSG00000029490		ENSMUSG00000045876		ENSMUSG00000070436		ENSMUSG00000022425	Enpp2
ENSMUSG00000051906		ENSMUSG00000016256		ENSMUSG00000071203		ENSMUSG00000073902	Gvin3
ENSMUSG00000049723		ENSMUSG00000026728		ENSMUSG00000000682		ENSMUSG00000027605	Acss2
ENSMUSG00000048065		ENSMUSG00000086272		ENSMUSG00000000732		ENSMUSG00000034457	Eda2r
ENSMUSG00000011263		ENSMUSG00000048865		ENSMUSG00000018927		ENSMUSG00000050122	Vwa3b
ENSMUSG00000038147		ENSMUSG00000022425		ENSMUSG00000020399		ENSMUSG00000031103	Elf4
ENSMUSG00000022817		ENSMUSG00000047307		ENSMUSG00000027547		ENSMUSG00000081557	Gm5697
ENSMUSG00000022371		ENSMUSG00000076441		ENSMUSG00000055866		ENSMUSG00000026675	Hsd17b7
ENSMUSG00000085773		ENSMUSG00000041538		ENSMUSG00000058135		ENSMUSG00000015568	Lpl
ENSMUSG00000044719		ENSMUSG00000056220		ENSMUSG00000109598		ENSMUSG00000045625	Pigz
ENSMUSG00000022425		ENSMUSG00000004609		ENSMUSG00000117733		ENSMUSG00000027547	Sall4
ENSMUSG00000073902		ENSMUSG00000109598		ENSMUSG00000019970		ENSMUSG00000063234	Gpr84
ENSMUSG00000027605		ENSMUSG00000044749		ENSMUSG00000021670		ENSMUSG00000026938	Fcna
ENSMUSG00000034457		ENSMUSG00000100837		ENSMUSG00000024164		ENSMUSG00000028581	Laptm5
ENSMUSG00000050122		ENSMUSG00000035093		ENSMUSG00000029838		ENSMUSG00000004730	Adgre1
ENSMUSG00000031103		ENSMUSG00000066058		ENSMUSG00000031170		ENSMUSG00000021696	Elovl7
ENSMUSG00000081557		ENSMUSG00000006390		ENSMUSG00000031740		ENSMUSG00000027376	Prom2
ENSMUSG00000026675		ENSMUSG00000030798		ENSMUSG00000035910		ENSMUSG00000015355	Cd48
ENSMUSG00000015568		ENSMUSG00000009356		ENSMUSG00000036545		ENSMUSG00000045657	Pcdhb10
ENSMUSG00000031104		ENSMUSG00000046186		ENSMUSG00000046410		ENSMUSG00000107451	Gm44421
ENSMUSG00000045625		ENSMUSG00000028150		ENSMUSG00000067714		ENSMUSG00000021903	Galnt15
ENSMUSG00000027547		ENSMUSG00000033105		ENSMUSG00000110235		ENSMUSG00000032036	Kirrel3
ENSMUSG00000063234		ENSMUSG00000000628		ENSMUSG00000000154		ENSMUSG00000032358	Fam83b
ENSMUSG00000026938		ENSMUSG00000033880		ENSMUSG00000015568		ENSMUSG00000047307	Pcdhb13
ENSMUSG00000028581		ENSMUSG00000033906		ENSMUSG00000030124		ENSMUSG00000026879	Gsn
ENSMUSG00000004730		ENSMUSG00000029838		ENSMUSG00000042622		ENSMUSG00000035606	Ky
ENSMUSG00000021696		ENSMUSG00000031349		ENSMUSG00000097789		ENSMUSG00000002900	Lamb1
ENSMUSG00000027376		ENSMUSG00000034457		ENSMUSG00000031103		ENSMUSG00000050600	Zfp831
ENSMUSG00000015355		ENSMUSG00000031167		ENSMUSG00000055172		ENSMUSG00000021070	Bdkrb2
ENSMUSG00000045657		ENSMUSG00000026656		ENSMUSG00000100837		ENSMUSG00000025270	Alas2
ENSMUSG00000107451		ENSMUSG00000020399		ENSMUSG00000000805		ENSMUSG00000029771	Irf5
ENSMUSG00000021903		ENSMUSG00000030669		ENSMUSG00000024165		ENSMUSG00000036985	Zdhhc9
ENSMUSG00000032036		ENSMUSG00000056071		ENSMUSG00000035606		ENSMUSG00000031838	Ifi30
ENSMUSG00000032358		ENSMUSG00000040061		ENSMUSG00000076435		ENSMUSG00000044811	Cd300c2
ENSMUSG00000047307		ENSMUSG00000031972		ENSMUSG00000092447		ENSMUSG00000000982	Ccl3
ENSMUSG00000026879		ENSMUSG00000073902		ENSMUSG00000009376		ENSMUSG00000024521	Pmaip1
ENSMUSG00000035606		ENSMUSG00000104282		ENSMUSG00000022505		ENSMUSG00000045876	Pcdhb8
ENSMUSG00000002900		ENSMUSG00000069792		ENSMUSG00000026109		ENSMUSG00000015341	Golga7
ENSMUSG00000050600		ENSMUSG00000030579		ENSMUSG00000048865		ENSMUSG00000031167	Rbm3
ENSMUSG00000021070		ENSMUSG00000056054		ENSMUSG00000049134		ENSMUSG00000074771	Ankef1
ENSMUSG00000054920		ENSMUSG00000044519		ENSMUSG00000058099		ENSMUSG00000053198	Prx
ENSMUSG00000025270		ENSMUSG00000032018		ENSMUSG00000074771		ENSMUSG00000022952	Runx1
ENSMUSG00000029771		ENSMUSG00000050122		ENSMUSG00000111995		ENSMUSG00000029675	Eln
ENSMUSG00000036985		ENSMUSG00000032484		ENSMUSG00000112441		ENSMUSG00000109887	Gm28756
ENSMUSG00000031838		ENSMUSG00000015568		ENSMUSG00000027669		ENSMUSG00000071203	Naip5
ENSMUSG00000044811		ENSMUSG00000055413		ENSMUSG00000059412		ENSMUSG00000102748	Pcdhgb2
ENSMUSG00000000982		ENSMUSG00000086655		ENSMUSG00000022488		ENSMUSG00000017493	Igfbp4
ENSMUSG00000024521		ENSMUSG00000024165		ENSMUSG00000026380		ENSMUSG00000031538	Plat
ENSMUSG00000045876		ENSMUSG00000015341		ENSMUSG00000031425		ENSMUSG00000063296	Tmem117
ENSMUSG00000015341		ENSMUSG00000031239		ENSMUSG00000050063		ENSMUSG00000054889	Dsp
ENSMUSG00000031167		ENSMUSG00000022231		ENSMUSG00000032300		ENSMUSG00000066058	Cldn19
ENSMUSG00000074771		ENSMUSG00000070436		ENSMUSG00000048583		ENSMUSG00000024395	Lims2
ENSMUSG00000053198		ENSMUSG00000042254		ENSMUSG00000068015		ENSMUSG00000030340	Scnn1a
ENSMUSG00000022952		ENSMUSG00000020953		ENSMUSG00000070570		ENSMUSG00000015947	Fcgr1
ENSMUSG00000029675		ENSMUSG00000044811				ENSMUSG00000022797	Tfrc
ENSMUSG00000109887		ENSMUSG00000105516				ENSMUSG00000027896	Slc16a4
ENSMUSG00000071203		ENSMUSG00000071203				ENSMUSG00000015714	Cers2
ENSMUSG00000102748		ENSMUSG00000074771				ENSMUSG00000055866	Per2
ENSMUSG00000017493		ENSMUSG00000025950				ENSMUSG00000030579	Tyrobp
ENSMUSG00000031538		ENSMUSG00000061816				ENSMUSG00000031740	Mmp2
ENSMUSG00000063296		ENSMUSG00000030495				ENSMUSG00000076441	Ass1
ENSMUSG00000054889		ENSMUSG00000044176				ENSMUSG00000032327	Stra6
ENSMUSG00000066058		ENSMUSG00000090877				ENSMUSG00000108218	Olfr1372-ps1
ENSMUSG00000033488		ENSMUSG00000041889				ENSMUSG00000006390	Elovl1
ENSMUSG00000024395		ENSMUSG00000093773				ENSMUSG00000029826	Zc3hav1
ENSMUSG00000030340		ENSMUSG00000049929				ENSMUSG00000034330	Plcg2
ENSMUSG00000015947		ENSMUSG00000031103				ENSMUSG00000006519	Cyba
ENSMUSG00000022797		ENSMUSG00000052942				ENSMUSG00000037664	Cdkn1c
ENSMUSG00000027896		ENSMUSG00000033308				ENSMUSG00000086272	BC039966
ENSMUSG00000061740		ENSMUSG00000049744				ENSMUSG00000031298	Adgrg2
ENSMUSG00000015714		ENSMUSG00000099924				ENSMUSG00000015340	Cybb
ENSMUSG00000055866		ENSMUSG00000029826				ENSMUSG00000040268	Plekha1
ENSMUSG00000030579		ENSMUSG00000032719				ENSMUSG00000041538	H2-Ob
ENSMUSG00000031740		ENSMUSG00000031165				ENSMUSG00000025950	Idh1
ENSMUSG00000076441		ENSMUSG00000024395				ENSMUSG00000022505	Emp2
ENSMUSG00000032327		ENSMUSG00000022665				ENSMUSG00000024411	Aqp4
ENSMUSG00000108218		ENSMUSG00000038147				ENSMUSG00000037370	Enpp1
ENSMUSG00000006390		ENSMUSG00000037318				ENSMUSG00000031349	Nsdhl
ENSMUSG00000106317		ENSMUSG00000068105				ENSMUSG00000032494	Tdgf1
ENSMUSG00000029826		ENSMUSG00000045657				ENSMUSG00000110235	Gm5086
ENSMUSG00000034330		ENSMUSG00000030340				ENSMUSG00000032719	Sbspon
ENSMUSG00000006519		ENSMUSG00000073555				ENSMUSG00000073409	H2-Q6
ENSMUSG00000037664		ENSMUSG00000024164				ENSMUSG00000110649	Gm40466
ENSMUSG00000086272		ENSMUSG00000092454				ENSMUSG00000024165	Jpt2
ENSMUSG00000031298		ENSMUSG00000029204				ENSMUSG00000021509	Slc25a48
ENSMUSG00000027195		ENSMUSG00000110235				ENSMUSG00000025716	Myo3a
ENSMUSG00000015340		ENSMUSG00000022371				ENSMUSG00000001506	Col1a1
ENSMUSG00000040268		ENSMUSG00000055945				ENSMUSG00000024397	Aif1
ENSMUSG00000041741		ENSMUSG00000076435				ENSMUSG00000010064	Slc38a3
ENSMUSG00000041538		ENSMUSG00000037474				ENSMUSG00000033105	Lss
ENSMUSG00000025950		ENSMUSG00000112276				ENSMUSG00000035093	Secisbp2l
ENSMUSG00000022505		ENSMUSG00000051747				ENSMUSG00000037016	Frem2
ENSMUSG00000025887		ENSMUSG00000015714				ENSMUSG00000033826	Dnah8
ENSMUSG00000018930		ENSMUSG00000035697				ENSMUSG00000000184	Ccnd2
ENSMUSG00000024411		ENSMUSG00000021091				ENSMUSG00000078945	Naip2
ENSMUSG00000037370		ENSMUSG00000055978				ENSMUSG00000029661	Col1a2
ENSMUSG00000031349		ENSMUSG00000029771				ENSMUSG00000026728	Vim
ENSMUSG00000032494		ENSMUSG00000112441				ENSMUSG00000029204	Rhoh
ENSMUSG00000110235		ENSMUSG00000073489				ENSMUSG00000040957	Cables1
ENSMUSG00000032719		ENSMUSG00000056423				ENSMUSG00000002668	Dennd1c
ENSMUSG00000073409		ENSMUSG00000022505				ENSMUSG00000029838	Ptn
ENSMUSG00000110649		ENSMUSG00000026380				ENSMUSG00000022231	Sema5a
ENSMUSG00000024165		ENSMUSG00000037278				ENSMUSG00000030495	Slc7a10
ENSMUSG00000021509		ENSMUSG00000037638				ENSMUSG00000006386	Tek
ENSMUSG00000025716		ENSMUSG00000058135				ENSMUSG00000052142	Rasal3
ENSMUSG00000001506		ENSMUSG00000110649				ENSMUSG00000037318	Traf3ip3
ENSMUSG00000024397		ENSMUSG00000036545				ENSMUSG00000057596	Trim30d
ENSMUSG00000010064		ENSMUSG00000038007				ENSMUSG00000059908	Mug1
ENSMUSG00000025383		ENSMUSG00000029490				ENSMUSG00000003283	Hck
ENSMUSG00000033105		ENSMUSG00000005251				ENSMUSG00000037638	Zbtb42
ENSMUSG00000035093		ENSMUSG00000067714				ENSMUSG00000079465	Col4a3
ENSMUSG00000037016		ENSMUSG00000033826				ENSMUSG00000031165	Was
ENSMUSG00000033826		ENSMUSG00000036634				ENSMUSG00000056423	Uts2b
ENSMUSG00000069308		ENSMUSG00000022900				ENSMUSG00000073555	Gm4951
ENSMUSG00000000184		ENSMUSG00000103882				ENSMUSG00000002147	Stat6
ENSMUSG00000078945		ENSMUSG00000006517				ENSMUSG00000043740	B430306N03Rik
ENSMUSG00000114773		ENSMUSG00000020901				ENSMUSG00000035697	Arhgap45
ENSMUSG00000053044		ENSMUSG00000036985				ENSMUSG00000020953	Coch
ENSMUSG00000029661		ENSMUSG00000067149				ENSMUSG00000068105	Tnfrsf13c
ENSMUSG00000026728		ENSMUSG00000043157				ENSMUSG00000086655	C330018A13Rik
ENSMUSG00000029204		ENSMUSG00000102516				ENSMUSG00000009545	Kcnq1
ENSMUSG00000040957		ENSMUSG00000054619				ENSMUSG00000036256	Igfbp7
ENSMUSG00000002668		ENSMUSG00000046410				ENSMUSG00000099924	Gm28320
ENSMUSG00000003812		ENSMUSG00000040268				ENSMUSG00000019779	Frk
ENSMUSG00000070526		ENSMUSG00000102748				ENSMUSG00000016946	Kctd5
ENSMUSG00000029838		ENSMUSG00000015829				ENSMUSG00000036833	Pnpla7
ENSMUSG00000022231		ENSMUSG00000019779				ENSMUSG00000006469	Slc34a3
ENSMUSG00000021760		ENSMUSG00000031740				ENSMUSG00000026380	Tfcp2l1
ENSMUSG00000030495		ENSMUSG00000022996				ENSMUSG00000043924	Ncmap
ENSMUSG00000006386		ENSMUSG00000030730				ENSMUSG00000015829	Tnr
ENSMUSG00000052142		ENSMUSG00000026614				ENSMUSG00000021091	Serpina3n
ENSMUSG00000037318		ENSMUSG00000006469				ENSMUSG00000041889	Shisa4
ENSMUSG00000041696		ENSMUSG00000036833				ENSMUSG00000051663	Pcdhb1
ENSMUSG00000057596		ENSMUSG00000090122				ENSMUSG00000024598	Fbn2
ENSMUSG00000059908		ENSMUSG00000004730				ENSMUSG00000090122	Kcne1l
ENSMUSG00000003283		ENSMUSG00000040838				ENSMUSG00000022508	Bcl6
ENSMUSG00000001334		ENSMUSG00000035606				ENSMUSG00000010751	Tnfrsf22
ENSMUSG00000024334		ENSMUSG00000015340				ENSMUSG00000032018	Sc5d
ENSMUSG00000037638		ENSMUSG00000110633				ENSMUSG00000020570	Sypl
ENSMUSG00000073910		ENSMUSG00000020387				ENSMUSG00000005142	Man2b1
ENSMUSG00000035778		ENSMUSG00000034573				ENSMUSG00000055978	Fut2
ENSMUSG00000066150		ENSMUSG00000109887				ENSMUSG00000058715	Fcer1g
ENSMUSG00000070047		ENSMUSG00000043458				ENSMUSG00000054619	Mettl7a1
ENSMUSG00000015149		ENSMUSG00000007122				ENSMUSG00000022900	Ildr1
ENSMUSG00000032899		ENSMUSG00000113845				ENSMUSG00000057003	Myh4
ENSMUSG00000079465		ENSMUSG00000002900				ENSMUSG00000070436	Serpinh1
ENSMUSG00000031165		ENSMUSG00000030087				ENSMUSG00000026548	Slamf9
ENSMUSG00000028332		ENSMUSG00000032193				ENSMUSG00000030087	Klf15
ENSMUSG00000056423		ENSMUSG00000028873				ENSMUSG00000055415	Atp10b
ENSMUSG00000073555		ENSMUSG00000031838				ENSMUSG00000005672	Kit
ENSMUSG00000002147		ENSMUSG00000100586				ENSMUSG00000059743	Fdps
ENSMUSG00000043740		ENSMUSG00000027896				ENSMUSG00000040694	Apobec2
ENSMUSG00000051615		ENSMUSG00000026778				ENSMUSG00000073489	Ifi204
ENSMUSG00000035697		ENSMUSG00000026548				ENSMUSG00000056071	S100a9
ENSMUSG00000020953		ENSMUSG00000029482				ENSMUSG00000030638	Sh3gl3
ENSMUSG00000022894		ENSMUSG00000022026				ENSMUSG00000103882	Gm37452
ENSMUSG00000068105		ENSMUSG00000030638				ENSMUSG00000039470	Zdhhc2
ENSMUSG00000086655		ENSMUSG00000020644				ENSMUSG00000056054	S100a8
ENSMUSG00000009545		ENSMUSG00000024397				ENSMUSG00000058099	Nfam1
ENSMUSG00000036256		ENSMUSG00000024053				ENSMUSG00000112276	5033421B08Rik
ENSMUSG00000025702		ENSMUSG00000012123				ENSMUSG00000036131	Frmd7
ENSMUSG00000099924		ENSMUSG00000043822				ENSMUSG00000043753	Dmrta1
ENSMUSG00000038179		ENSMUSG00000030022				ENSMUSG00000025013	Tll2
ENSMUSG00000097462		ENSMUSG00000107451				ENSMUSG00000030669	Calca
ENSMUSG00000019779		ENSMUSG00000075224				ENSMUSG00000023036	Pcdhgc4
ENSMUSG00000019899		ENSMUSG00000030131				ENSMUSG00000005533	Igf1r
ENSMUSG00000021457		ENSMUSG00000027559				ENSMUSG00000027852	Nras
ENSMUSG00000016946		ENSMUSG00000021143				ENSMUSG00000026051	Ecrg4
ENSMUSG00000036833		ENSMUSG00000031298				ENSMUSG00000105516	Gm36823
ENSMUSG00000006469		ENSMUSG00000050600				ENSMUSG00000027750	Postn
ENSMUSG00000026380		ENSMUSG00000030256				ENSMUSG00000079547	H2-DMb1
ENSMUSG00000043924		ENSMUSG00000095366				ENSMUSG00000002190	Clgn
ENSMUSG00000068923		ENSMUSG00000026950				ENSMUSG00000024378	Stard4
ENSMUSG00000015829		ENSMUSG00000039470				ENSMUSG00000005251	Ripk4
ENSMUSG00000021091		ENSMUSG00000022508				ENSMUSG00000069792	Wfdc17
ENSMUSG00000041889		ENSMUSG00000052305				ENSMUSG00000076435	Acsf2
ENSMUSG00000051663		ENSMUSG00000105813				ENSMUSG00000102516	Gm38340
ENSMUSG00000095042		ENSMUSG00000112095				ENSMUSG00000075224	Lrrc55
ENSMUSG00000024598		ENSMUSG00000036131				ENSMUSG00000042254	Cilp
ENSMUSG00000085322		ENSMUSG00000024378				ENSMUSG00000030399	Ckm
ENSMUSG00000090122		ENSMUSG00000022952				ENSMUSG00000031239	Itm2a
ENSMUSG00000022508		ENSMUSG00000032036				ENSMUSG00000037089	Slc35b2
ENSMUSG00000095079		ENSMUSG00000000409				ENSMUSG00000018819	Lsp1
ENSMUSG00000052160		ENSMUSG00000010064				ENSMUSG00000024164	C3
ENSMUSG00000010751		ENSMUSG00000078945				ENSMUSG00000038526	Car14
ENSMUSG00000032018		ENSMUSG00000037089				ENSMUSG00000006517	Mvd
ENSMUSG00000109695		ENSMUSG00000073411				ENSMUSG00000112441	Gm48898
ENSMUSG00000034842		ENSMUSG00000079547				ENSMUSG00000107134	Gm42528
ENSMUSG00000020570		ENSMUSG00000046245				ENSMUSG00000040838	Gm11639
ENSMUSG00000005142		ENSMUSG00000031538				ENSMUSG00000024053	Emilin2
ENSMUSG00000055978		ENSMUSG00000030672				ENSMUSG00000043822	Adamtsl5
ENSMUSG00000058715		ENSMUSG00000048489				ENSMUSG00000093773	Obox3-ps7
ENSMUSG00000069808		ENSMUSG00000043088				ENSMUSG00000100586	Vmn1r90
ENSMUSG00000054619		ENSMUSG00000045294				ENSMUSG00000056966	Gjc3
ENSMUSG00000022900		ENSMUSG00000046598				ENSMUSG00000037474	Dtl
ENSMUSG00000036158		ENSMUSG00000043924				ENSMUSG00000030256	Bhlhe41
ENSMUSG00000057003		ENSMUSG00000024598				ENSMUSG00000021143	Pacs2
ENSMUSG00000070436		ENSMUSG00000052142				ENSMUSG00000110633	Gm32122
ENSMUSG00000026548		ENSMUSG00000000184				ENSMUSG00000020644	Id2
ENSMUSG00000030087		ENSMUSG00000015314				ENSMUSG00000104282	Gm37460
ENSMUSG00000035891		ENSMUSG00000059743				ENSMUSG00000048489	Depp1
ENSMUSG00000114608		ENSMUSG00000015947				ENSMUSG00000043157	Arl11
ENSMUSG00000055415		ENSMUSG00000028955				ENSMUSG00000058135	Gstm1
ENSMUSG00000027995		ENSMUSG00000002668				ENSMUSG00000028955	Vamp3
ENSMUSG00000005672		ENSMUSG00000043753				ENSMUSG00000055945	Prr18
ENSMUSG00000089797		ENSMUSG00000024521				ENSMUSG00000036545	Adamts2
ENSMUSG00000059743		ENSMUSG00000026051				ENSMUSG00000067149	Jchain
ENSMUSG00000028654		ENSMUSG00000079465				ENSMUSG00000022026	Olfm4
ENSMUSG00000040694		ENSMUSG00000104291				ENSMUSG00000042622	Maff
ENSMUSG00000073489		ENSMUSG00000053411				ENSMUSG00000055413	H2-Q5
ENSMUSG00000056071		ENSMUSG00000005142				ENSMUSG00000028873	Cdca8
ENSMUSG00000027070		ENSMUSG00000037016				ENSMUSG00000053411	Cbx7
ENSMUSG00000030638		ENSMUSG00000006519				ENSMUSG00000045679	Pqlc3
ENSMUSG00000103882		ENSMUSG00000056130				ENSMUSG00000020387	Jade2
ENSMUSG00000039470		ENSMUSG00000037370				ENSMUSG00000051652	Lrrc3
ENSMUSG00000027386		ENSMUSG00000042622				ENSMUSG00000092454	Gm2991
ENSMUSG00000056054		ENSMUSG00000045625				ENSMUSG00000050315	Synpo2
ENSMUSG00000058099		ENSMUSG00000100627				ENSMUSG00000105813	Gm42928
ENSMUSG00000112276		ENSMUSG00000005672				ENSMUSG00000067714	Lpar5
ENSMUSG00000029994		ENSMUSG00000020583				ENSMUSG00000056130	Ticam2
ENSMUSG00000027790		ENSMUSG00000109127				ENSMUSG00000096833	Igkv4-55
ENSMUSG00000036131		ENSMUSG00000114822				ENSMUSG00000025140	Pycr1
ENSMUSG00000043753		ENSMUSG00000083287				ENSMUSG00000062391	4932435O22Rik
ENSMUSG00000094651		ENSMUSG00000055415				ENSMUSG00000104291	A130071D04Rik
ENSMUSG00000025013		ENSMUSG00000006457				ENSMUSG00000027559	Car3
ENSMUSG00000030669		ENSMUSG00000112023				ENSMUSG00000020475	Pgam2
ENSMUSG00000023036		ENSMUSG00000031375				ENSMUSG00000029084	Cd38
ENSMUSG00000005533		ENSMUSG00000057596				ENSMUSG00000036634	Mag
ENSMUSG00000027852		ENSMUSG00000071478				ENSMUSG00000040852	Plekhh2
ENSMUSG00000026051		ENSMUSG00000003283				ENSMUSG00000030022	Adamts9
ENSMUSG00000105516		ENSMUSG00000034330				ENSMUSG00000075053	Vdac3-ps1
ENSMUSG00000023959		ENSMUSG00000029084				ENSMUSG00000024087	Cyp1b1
ENSMUSG00000028360		ENSMUSG00000018819				ENSMUSG00000112095	Sros1
ENSMUSG00000027750		ENSMUSG00000058715				ENSMUSG00000030220	Arhgdib
ENSMUSG00000025202		ENSMUSG00000010751				ENSMUSG00000054675	Tmem119
ENSMUSG00000079547		ENSMUSG00000111995				ENSMUSG00000116617	Gm49767
ENSMUSG00000002190		ENSMUSG00000040852				ENSMUSG00000000409	Lck
ENSMUSG00000027555		ENSMUSG00000071847				ENSMUSG00000113845	Gm39473
ENSMUSG00000024378		ENSMUSG00000029718				ENSMUSG00000006574	Slc4a1
ENSMUSG00000005251		ENSMUSG00000027750				ENSMUSG00000022996	Wnt10b
ENSMUSG00000056529		ENSMUSG00000056966				ENSMUSG00000029718	Pcolce
ENSMUSG00000069792		ENSMUSG00000018168				ENSMUSG00000052305	Hbb-bs
ENSMUSG00000043230		ENSMUSG00000062391				ENSMUSG00000029482	Aacs
ENSMUSG00000076435		ENSMUSG00000111360				ENSMUSG00000045294	Insig1
ENSMUSG00000020573		ENSMUSG00000002147				ENSMUSG00000047117	Ankdd1b
ENSMUSG00000102516		ENSMUSG00000040957				ENSMUSG00000030730	Atp2a1
ENSMUSG00000028795		ENSMUSG00000020570				ENSMUSG00000100599	1700120C14Rik
ENSMUSG00000047786		ENSMUSG00000016946				ENSMUSG00000032193	Ldlr
ENSMUSG00000075224		ENSMUSG00000032496				ENSMUSG00000109127	Gm31135
ENSMUSG00000051506		ENSMUSG00000023036				ENSMUSG00000061816	Myl1
ENSMUSG00000042254		ENSMUSG00000025140				ENSMUSG00000073411	H2-D1
ENSMUSG00000030399		ENSMUSG00000002190				ENSMUSG00000031972	Acta1
ENSMUSG00000031239		ENSMUSG00000037031				ENSMUSG00000012123	Crybg2
ENSMUSG00000037089		ENSMUSG00000024087				ENSMUSG00000030131	Mug2
ENSMUSG00000051985		ENSMUSG00000063296				ENSMUSG00000100627	A830008E24Rik
ENSMUSG00000018819		ENSMUSG00000050315				ENSMUSG00000020583	Matn3
ENSMUSG00000027952		ENSMUSG00000025013				ENSMUSG00000055172	C1ra
ENSMUSG00000025537		ENSMUSG00000049436				ENSMUSG00000112023	Lilrb4b
ENSMUSG00000024164		ENSMUSG00000038526				ENSMUSG00000015314	Slamf6
ENSMUSG00000044783		ENSMUSG00000036256				ENSMUSG00000061723	Tnnt3
ENSMUSG00000038526		ENSMUSG00000032494				ENSMUSG00000032484	Ngp
ENSMUSG00000006517		ENSMUSG00000107017				ENSMUSG00000090877	Hspa1b
ENSMUSG00000038843		ENSMUSG00000047117				ENSMUSG00000051747	Ttn
ENSMUSG00000036523		ENSMUSG00000100599				ENSMUSG00000007122	Casq1
ENSMUSG00000074281		ENSMUSG00000005533				ENSMUSG00000026950	Neb
ENSMUSG00000112441		ENSMUSG00000021451				ENSMUSG00000030672	Mylpf
ENSMUSG00000107134		ENSMUSG00000116617				ENSMUSG00000006457	Actn3
ENSMUSG00000004105		ENSMUSG00000027852				ENSMUSG00000111995	Gm48697
ENSMUSG00000024526		ENSMUSG00000006386
ENSMUSG00000040838		ENSMUSG00000054675
ENSMUSG00000066026		ENSMUSG00000045679
ENSMUSG00000024053		ENSMUSG00000024600
ENSMUSG00000118434
ENSMUSG00000043822
ENSMUSG00000031467
ENSMUSG00000055197
ENSMUSG00000086782
ENSMUSG00000049164
ENSMUSG00000020263
ENSMUSG00000093773
ENSMUSG00000102827
ENSMUSG00000100586
ENSMUSG00000056966
ENSMUSG00000037474
ENSMUSG00000046688
ENSMUSG00000025232
ENSMUSG00000030256
ENSMUSG00000109783
ENSMUSG00000021143
ENSMUSG00000110633
ENSMUSG00000020644
ENSMUSG00000029484
ENSMUSG00000104282
ENSMUSG00000048489
ENSMUSG00000031441
ENSMUSG00000043157
ENSMUSG00000058135
ENSMUSG00000028955
ENSMUSG00000055945
ENSMUSG00000087565
ENSMUSG00000036545
ENSMUSG00000021280
ENSMUSG00000042453
ENSMUSG00000067149
ENSMUSG00000029866
ENSMUSG00000022026
ENSMUSG00000070504
ENSMUSG00000033491
ENSMUSG00000018008
ENSMUSG00000032966
ENSMUSG00000042622
ENSMUSG00000055413
ENSMUSG00000061171
ENSMUSG00000092471
ENSMUSG00000027956
ENSMUSG00000076612
ENSMUSG00000028873
ENSMUSG00000070780
ENSMUSG00000091694
ENSMUSG00000023827
ENSMUSG00000041762
ENSMUSG00000025728
ENSMUSG00000053411
ENSMUSG00000045679
ENSMUSG00000001700
ENSMUSG00000063193
ENSMUSG00000020173
ENSMUSG00000020387
ENSMUSG00000051652
ENSMUSG00000021943
ENSMUSG00000050921
ENSMUSG00000114945
ENSMUSG00000057329
ENSMUSG00000092454
ENSMUSG00000050315
ENSMUSG00000098758
ENSMUSG00000039005
ENSMUSG00000105813
ENSMUSG00000018417
ENSMUSG00000038422
ENSMUSG00000067714
ENSMUSG00000026482
ENSMUSG00000035212
ENSMUSG00000040229
ENSMUSG00000067203
ENSMUSG00000056130
ENSMUSG00000022148
ENSMUSG00000029086
ENSMUSG00000049690
ENSMUSG00000096833
ENSMUSG00000045667
ENSMUSG00000025140
ENSMUSG00000062391
ENSMUSG00000082361
ENSMUSG00000104291
ENSMUSG00000027559
ENSMUSG00000068762
ENSMUSG00000110027
ENSMUSG00000020475
ENSMUSG00000047003
ENSMUSG00000029084
ENSMUSG00000036634
ENSMUSG00000001508
ENSMUSG00000040852
ENSMUSG00000030022
ENSMUSG00000075053
ENSMUSG00000024087
ENSMUSG00000022472
ENSMUSG00000046167
ENSMUSG00000112095
ENSMUSG00000024030
ENSMUSG00000068580
ENSMUSG00000019843
ENSMUSG00000021287
ENSMUSG00000024737
ENSMUSG00000030220
ENSMUSG00000027947
ENSMUSG00000026031
ENSMUSG00000052085
ENSMUSG00000018171
ENSMUSG00000054675
ENSMUSG00000116617
ENSMUSG00000056737
ENSMUSG00000043342
ENSMUSG00000030917
ENSMUSG00000081534
ENSMUSG00000000409
ENSMUSG00000071369
ENSMUSG00000026979
ENSMUSG00000113845
ENSMUSG00000063535
ENSMUSG00000001663
ENSMUSG00000009350
ENSMUSG00000030237
ENSMUSG00000047735
ENSMUSG00000006574
ENSMUSG00000022996
ENSMUSG00000055067
ENSMUSG00000033985
ENSMUSG00000043279
ENSMUSG00000062760
ENSMUSG00000030786
ENSMUSG00000040747
ENSMUSG00000056394
ENSMUSG00000089633
ENSMUSG00000039046
ENSMUSG00000085282
ENSMUSG00000036036
ENSMUSG00000029718
ENSMUSG00000052305
ENSMUSG00000092021
ENSMUSG00000067818
ENSMUSG00000020591
ENSMUSG00000026141
ENSMUSG00000020437
ENSMUSG00000085337
ENSMUSG00000018846
ENSMUSG00000029482
ENSMUSG00000058589
ENSMUSG00000047250
ENSMUSG00000045294
ENSMUSG00000047117
ENSMUSG00000117613
ENSMUSG00000020467
ENSMUSG00000049538
ENSMUSG00000030730
ENSMUSG00000100599
ENSMUSG00000032193
ENSMUSG00000109127
ENSMUSG00000048442
ENSMUSG00000020641
ENSMUSG00000026888
ENSMUSG00000052212
ENSMUSG00000061816
ENSMUSG00000020865
ENSMUSG00000032517
ENSMUSG00000055541
ENSMUSG00000016763
ENSMUSG00000073490
ENSMUSG00000073411
ENSMUSG00000097654
ENSMUSG00000049625
ENSMUSG00000031972
ENSMUSG00000012123
ENSMUSG00000030131
ENSMUSG00000100627
ENSMUSG00000033107
ENSMUSG00000020870
ENSMUSG00000051839
ENSMUSG00000025993
ENSMUSG00000070527
ENSMUSG00000041205
ENSMUSG00000069372
ENSMUSG00000018341
ENSMUSG00000031101
ENSMUSG00000032285
ENSMUSG00000020027
ENSMUSG00000020583
ENSMUSG00000055172
ENSMUSG00000085193
ENSMUSG00000036206
ENSMUSG00000033220
ENSMUSG00000048163
ENSMUSG00000112023
ENSMUSG00000016344
ENSMUSG00000015314
ENSMUSG00000040139
ENSMUSG00000017386
ENSMUSG00000025795
ENSMUSG00000030769
ENSMUSG00000061723

## Sheet: SC YvO
DESeq2		edgeR		Cuffdiff		Consensus	Name
ENSMUSG00000030789		ENSMUSG00000030789		ENSMUSG00000000120		ENSMUSG00000030789	Itgax
ENSMUSG00000046805		ENSMUSG00000046805		ENSMUSG00000000134		ENSMUSG00000046805	Mpeg1
ENSMUSG00000079293		ENSMUSG00000068129		ENSMUSG00000000154		ENSMUSG00000079293	Clec7a
ENSMUSG00000050335		ENSMUSG00000050335		ENSMUSG00000000275		ENSMUSG00000050335	Lgals3
ENSMUSG00000027656		ENSMUSG00000079293		ENSMUSG00000000290		ENSMUSG00000027656	Ccn5
ENSMUSG00000021091		ENSMUSG00000021091		ENSMUSG00000000303		ENSMUSG00000021091	Serpina3n
ENSMUSG00000068129		ENSMUSG00000073418		ENSMUSG00000000560		ENSMUSG00000068129	Cst7
ENSMUSG00000064267		ENSMUSG00000027656		ENSMUSG00000000567		ENSMUSG00000064267	Hvcn1
ENSMUSG00000044468		ENSMUSG00000026697		ENSMUSG00000000628		ENSMUSG00000044468	Tent5c
ENSMUSG00000018774		ENSMUSG00000030577		ENSMUSG00000000682		ENSMUSG00000018774	Cd68
ENSMUSG00000015340		ENSMUSG00000029816		ENSMUSG00000000732		ENSMUSG00000015340	Cybb
ENSMUSG00000024300		ENSMUSG00000018774		ENSMUSG00000000982		ENSMUSG00000024300	Myo1f
ENSMUSG00000026395		ENSMUSG00000015568		ENSMUSG00000001020		ENSMUSG00000026395	Ptprc
ENSMUSG00000015568		ENSMUSG00000039518		ENSMUSG00000001025		ENSMUSG00000015568	Lpl
ENSMUSG00000073418		ENSMUSG00000036887		ENSMUSG00000001119		ENSMUSG00000073418	C4b
ENSMUSG00000030577		ENSMUSG00000090675		ENSMUSG00000001334		ENSMUSG00000030577	Cd22
ENSMUSG00000026177		ENSMUSG00000015340		ENSMUSG00000001467		ENSMUSG00000026177	Slc11a1
ENSMUSG00000026697		ENSMUSG00000069516		ENSMUSG00000001473		ENSMUSG00000026697	Myoc
ENSMUSG00000040552		ENSMUSG00000049723		ENSMUSG00000001506		ENSMUSG00000040552	C3ar1
ENSMUSG00000097415		ENSMUSG00000044468		ENSMUSG00000001751		ENSMUSG00000097415	AU020206
ENSMUSG00000038147		ENSMUSG00000000290		ENSMUSG00000002111		ENSMUSG00000038147	Cd84
ENSMUSG00000000290		ENSMUSG00000023992		ENSMUSG00000002190		ENSMUSG00000000290	Itgb2
ENSMUSG00000000682		ENSMUSG00000038642		ENSMUSG00000002332		ENSMUSG00000000682	Cd52
ENSMUSG00000024737		ENSMUSG00000040552		ENSMUSG00000002341		ENSMUSG00000024737	Slc15a3
ENSMUSG00000026656		ENSMUSG00000026728		ENSMUSG00000002602		ENSMUSG00000026656	Fcgr2b
ENSMUSG00000033880		ENSMUSG00000026395		ENSMUSG00000002603		ENSMUSG00000033880	Lgals3bp
ENSMUSG00000020143		ENSMUSG00000097415		ENSMUSG00000002831		ENSMUSG00000020143	Dock2
ENSMUSG00000045498		ENSMUSG00000064267		ENSMUSG00000002983		ENSMUSG00000045498	Pcdhb3
ENSMUSG00000004707		ENSMUSG00000036896		ENSMUSG00000002985		ENSMUSG00000004707	Ly9
ENSMUSG00000036887		ENSMUSG00000033880		ENSMUSG00000002992		ENSMUSG00000036887	C1qa
ENSMUSG00000023992		ENSMUSG00000046186		ENSMUSG00000003283		ENSMUSG00000023992	Trem2
ENSMUSG00000021281		ENSMUSG00000024164		ENSMUSG00000003418		ENSMUSG00000021281	Tnfaip2
ENSMUSG00000069516		ENSMUSG00000004707		ENSMUSG00000004098		ENSMUSG00000069516	Lyz2
ENSMUSG00000036896		ENSMUSG00000038147		ENSMUSG00000004266		ENSMUSG00000036896	C1qc
ENSMUSG00000038642		ENSMUSG00000036905		ENSMUSG00000004508		ENSMUSG00000038642	Ctss
ENSMUSG00000046186		ENSMUSG00000024300		ENSMUSG00000004552		ENSMUSG00000046186	Cd109
ENSMUSG00000056737		ENSMUSG00000026177		ENSMUSG00000004609		ENSMUSG00000056737	Capg
ENSMUSG00000015243		ENSMUSG00000022218		ENSMUSG00000004707		ENSMUSG00000015243	Abca1
ENSMUSG00000026728		ENSMUSG00000023078		ENSMUSG00000004709		ENSMUSG00000026728	Vim
ENSMUSG00000022488		ENSMUSG00000000982		ENSMUSG00000004730		ENSMUSG00000022488	Nckap1l
ENSMUSG00000029816		ENSMUSG00000026656		ENSMUSG00000004885		ENSMUSG00000029816	Gpnmb
ENSMUSG00000051599		ENSMUSG00000020120		ENSMUSG00000004891		ENSMUSG00000051599	Pcdhb2
ENSMUSG00000004266		ENSMUSG00000045502		ENSMUSG00000004951		ENSMUSG00000004266	Ptpn6
ENSMUSG00000036905		ENSMUSG00000000682		ENSMUSG00000004952		ENSMUSG00000036905	C1qb
ENSMUSG00000112148		ENSMUSG00000026285		ENSMUSG00000005087		ENSMUSG00000112148	Lilrb4a
ENSMUSG00000038540		ENSMUSG00000016256		ENSMUSG00000005142		ENSMUSG00000038540	Tmc3
ENSMUSG00000006519		ENSMUSG00000024737		ENSMUSG00000005251		ENSMUSG00000006519	Cyba
ENSMUSG00000024164		ENSMUSG00000030579		ENSMUSG00000005397		ENSMUSG00000024164	C3
ENSMUSG00000000982		ENSMUSG00000020143		ENSMUSG00000005413		ENSMUSG00000000982	Ccl3
ENSMUSG00000020120		ENSMUSG00000062082		ENSMUSG00000005672		ENSMUSG00000020120	Plek
ENSMUSG00000016256		ENSMUSG00000028238		ENSMUSG00000006219		ENSMUSG00000016256	Ctsz
ENSMUSG00000027995		ENSMUSG00000038540		ENSMUSG00000006369		ENSMUSG00000027995	Tlr2
ENSMUSG00000022952		ENSMUSG00000038179		ENSMUSG00000006457		ENSMUSG00000022952	Runx1
ENSMUSG00000005142		ENSMUSG00000022488		ENSMUSG00000006519		ENSMUSG00000005142	Man2b1
ENSMUSG00000090675		ENSMUSG00000056737		ENSMUSG00000006782		ENSMUSG00000090675	Olfr111
ENSMUSG00000010461		ENSMUSG00000112148		ENSMUSG00000007041		ENSMUSG00000010461	Eya4
ENSMUSG00000039518		ENSMUSG00000028459		ENSMUSG00000007122		ENSMUSG00000039518	Cdsn
ENSMUSG00000026628		ENSMUSG00000015243		ENSMUSG00000007480		ENSMUSG00000026628	Atf3
ENSMUSG00000030579		ENSMUSG00000021281		ENSMUSG00000007613		ENSMUSG00000030579	Tyrobp
ENSMUSG00000041515		ENSMUSG00000041515		ENSMUSG00000007682		ENSMUSG00000041515	Irf8
ENSMUSG00000035778		ENSMUSG00000063193		ENSMUSG00000007877		ENSMUSG00000035778	Ggta1
ENSMUSG00000022218		ENSMUSG00000027995		ENSMUSG00000007891		ENSMUSG00000022218	Tgm1
ENSMUSG00000063687		ENSMUSG00000028859		ENSMUSG00000009376		ENSMUSG00000063687	Pcdhb5
ENSMUSG00000022148		ENSMUSG00000029484		ENSMUSG00000009670		ENSMUSG00000022148	Fyb
ENSMUSG00000028859		ENSMUSG00000005142		ENSMUSG00000010021		ENSMUSG00000028859	Csf3r
ENSMUSG00000026548		ENSMUSG00000045498		ENSMUSG00000010461		ENSMUSG00000026548	Slamf9
ENSMUSG00000043943		ENSMUSG00000015355		ENSMUSG00000011263		ENSMUSG00000043943	Naalad2
ENSMUSG00000015355		ENSMUSG00000028581		ENSMUSG00000013076		ENSMUSG00000015355	Cd48
ENSMUSG00000049723		ENSMUSG00000051599		ENSMUSG00000013584		ENSMUSG00000049723	Mmp12
ENSMUSG00000052142		ENSMUSG00000037708		ENSMUSG00000013707		ENSMUSG00000052142	Rasal3
ENSMUSG00000028459		ENSMUSG00000004266		ENSMUSG00000014599		ENSMUSG00000028459	Cd72
ENSMUSG00000004730		ENSMUSG00000006519		ENSMUSG00000015090		ENSMUSG00000004730	Adgre1
ENSMUSG00000058715		ENSMUSG00000026628		ENSMUSG00000015243		ENSMUSG00000058715	Fcer1g
ENSMUSG00000037708		ENSMUSG00000004552		ENSMUSG00000015340		ENSMUSG00000037708	Spag6
ENSMUSG00000035004		ENSMUSG00000009376		ENSMUSG00000015341		ENSMUSG00000035004	Igsf6
ENSMUSG00000078945		ENSMUSG00000028327		ENSMUSG00000015355		ENSMUSG00000078945	Naip2
ENSMUSG00000015950		ENSMUSG00000001025		ENSMUSG00000015568		ENSMUSG00000015950	Ncf1
ENSMUSG00000021822		ENSMUSG00000005397		ENSMUSG00000015852		ENSMUSG00000021822	Plau
ENSMUSG00000004609		ENSMUSG00000035778		ENSMUSG00000015947		ENSMUSG00000004609	Cd33
ENSMUSG00000030798		ENSMUSG00000041828		ENSMUSG00000015950		ENSMUSG00000030798	Cd37
ENSMUSG00000030406		ENSMUSG00000026358		ENSMUSG00000016256		ENSMUSG00000030406	Gipr
ENSMUSG00000045502		ENSMUSG00000004730		ENSMUSG00000016496		ENSMUSG00000045502	Hcar2
ENSMUSG00000009376		ENSMUSG00000071068		ENSMUSG00000016918		ENSMUSG00000009376	Met
ENSMUSG00000030047		ENSMUSG00000026548		ENSMUSG00000017344		ENSMUSG00000030047	Arhgap25
ENSMUSG00000061132		ENSMUSG00000026043		ENSMUSG00000017493		ENSMUSG00000061132	Blnk
ENSMUSG00000044811		ENSMUSG00000067586		ENSMUSG00000018008		ENSMUSG00000044811	Cd300c2
ENSMUSG00000063234		ENSMUSG00000035551		ENSMUSG00000018042		ENSMUSG00000063234	Gpr84
ENSMUSG00000071203		ENSMUSG00000022952		ENSMUSG00000018143		ENSMUSG00000071203	Naip5
ENSMUSG00000051486		ENSMUSG00000068699		ENSMUSG00000018217		ENSMUSG00000051486	Pcdhb11
ENSMUSG00000018654		ENSMUSG00000058715		ENSMUSG00000018339		ENSMUSG00000018654	Ikzf1
ENSMUSG00000048865		ENSMUSG00000063234		ENSMUSG00000018459		ENSMUSG00000048865	Arhgap30
ENSMUSG00000067586		ENSMUSG00000030111		ENSMUSG00000018654		ENSMUSG00000067586	S1pr3
ENSMUSG00000029484		ENSMUSG00000030406		ENSMUSG00000018774		ENSMUSG00000029484	Anxa3
ENSMUSG00000026285		ENSMUSG00000022148		ENSMUSG00000018920		ENSMUSG00000026285	Pdcd1
ENSMUSG00000038179		ENSMUSG00000010461		ENSMUSG00000018927		ENSMUSG00000038179	Slamf7
ENSMUSG00000041828		ENSMUSG00000050370		ENSMUSG00000018930		ENSMUSG00000041828	Abca8a
ENSMUSG00000018008		ENSMUSG00000001131		ENSMUSG00000019232		ENSMUSG00000018008	Cyth4
ENSMUSG00000005397		ENSMUSG00000018008		ENSMUSG00000019832		ENSMUSG00000005397	Nid1
ENSMUSG00000032122		ENSMUSG00000021822		ENSMUSG00000019888		ENSMUSG00000032122	Slc37a2
ENSMUSG00000051678		ENSMUSG00000078945		ENSMUSG00000020000		ENSMUSG00000051678	Pcdhb6
ENSMUSG00000001025		ENSMUSG00000051486		ENSMUSG00000020053		ENSMUSG00000001025	S100a6
ENSMUSG00000073490		ENSMUSG00000002985		ENSMUSG00000020092		ENSMUSG00000073490	Ifi207
ENSMUSG00000050370		ENSMUSG00000035004		ENSMUSG00000020097		ENSMUSG00000050370	Ch25h
ENSMUSG00000034116		ENSMUSG00000117239		ENSMUSG00000020120		ENSMUSG00000034116	Vav1
ENSMUSG00000028581		ENSMUSG00000004609		ENSMUSG00000020143		ENSMUSG00000028581	Laptm5
ENSMUSG00000074151		ENSMUSG00000018930		ENSMUSG00000020150		ENSMUSG00000074151	Nlrc5
ENSMUSG00000020097		ENSMUSG00000007891		ENSMUSG00000020241		ENSMUSG00000020097	Sgpl1
ENSMUSG00000001131		ENSMUSG00000063687		ENSMUSG00000020264		ENSMUSG00000001131	Timp1
ENSMUSG00000020573		ENSMUSG00000004891		ENSMUSG00000020387		ENSMUSG00000020573	Pik3cg
ENSMUSG00000052160		ENSMUSG00000074151		ENSMUSG00000020388		ENSMUSG00000052160	Pld4
ENSMUSG00000071713		ENSMUSG00000105813		ENSMUSG00000020396		ENSMUSG00000071713	Csf2rb
ENSMUSG00000052085		ENSMUSG00000061232		ENSMUSG00000020399		ENSMUSG00000052085	Dock8
ENSMUSG00000037994		ENSMUSG00000027832		ENSMUSG00000020427		ENSMUSG00000037994	Slc9b2
ENSMUSG00000030124		ENSMUSG00000073490		ENSMUSG00000020573		ENSMUSG00000030124	Lag3
ENSMUSG00000015947		ENSMUSG00000044811		ENSMUSG00000020583		ENSMUSG00000015947	Fcgr1
ENSMUSG00000020399		ENSMUSG00000026547		ENSMUSG00000020641		ENSMUSG00000020399	Havcr2
ENSMUSG00000030111		ENSMUSG00000030124		ENSMUSG00000020676		ENSMUSG00000030111	A2m
ENSMUSG00000051439		ENSMUSG00000112023		ENSMUSG00000020709		ENSMUSG00000051439	Cd14
ENSMUSG00000000628		ENSMUSG00000043943		ENSMUSG00000020821		ENSMUSG00000000628	Hk2
ENSMUSG00000026043		ENSMUSG00000071203		ENSMUSG00000020865		ENSMUSG00000026043	Col3a1
ENSMUSG00000063193		ENSMUSG00000018341		ENSMUSG00000020901		ENSMUSG00000063193	Cd300lb
ENSMUSG00000071714		ENSMUSG00000051242		ENSMUSG00000020926		ENSMUSG00000071714	Csf2rb2
ENSMUSG00000040613		ENSMUSG00000071714		ENSMUSG00000020932		ENSMUSG00000040613	Apobec1
ENSMUSG00000051242		ENSMUSG00000022146		ENSMUSG00000020953		ENSMUSG00000051242	Pcdhb9
ENSMUSG00000004552		ENSMUSG00000021665		ENSMUSG00000021070		ENSMUSG00000004552	Ctse
ENSMUSG00000033777		ENSMUSG00000004709		ENSMUSG00000021091		ENSMUSG00000033777	Tlr13
ENSMUSG00000105813		ENSMUSG00000030047		ENSMUSG00000021200		ENSMUSG00000105813	Gm42928
ENSMUSG00000025887		ENSMUSG00000015950		ENSMUSG00000021250		ENSMUSG00000025887	Casp12
ENSMUSG00000006219		ENSMUSG00000035697		ENSMUSG00000021281		ENSMUSG00000006219	Fblim1
ENSMUSG00000056529		ENSMUSG00000071713		ENSMUSG00000021322		ENSMUSG00000056529	Ptafr
ENSMUSG00000029771		ENSMUSG00000040613		ENSMUSG00000021390		ENSMUSG00000029771	Irf5
ENSMUSG00000071068		ENSMUSG00000074796		ENSMUSG00000021411		ENSMUSG00000071068	Treml2
ENSMUSG00000027832		ENSMUSG00000061132		ENSMUSG00000021423		ENSMUSG00000027832	Ptx3
ENSMUSG00000074796		ENSMUSG00000052142		ENSMUSG00000021457		ENSMUSG00000074796	Slc4a11
ENSMUSG00000038843		ENSMUSG00000018654		ENSMUSG00000021477		ENSMUSG00000038843	Gcnt1
ENSMUSG00000031103		ENSMUSG00000005087		ENSMUSG00000021665		ENSMUSG00000031103	Elf4
ENSMUSG00000020865		ENSMUSG00000020053		ENSMUSG00000021696		ENSMUSG00000020865	Abcc3
ENSMUSG00000002985		ENSMUSG00000034116		ENSMUSG00000021697		ENSMUSG00000002985	Apoe
ENSMUSG00000034330		ENSMUSG00000059498		ENSMUSG00000021760		ENSMUSG00000034330	Plcg2
ENSMUSG00000026358		ENSMUSG00000043157		ENSMUSG00000021763		ENSMUSG00000026358	Rgs1
ENSMUSG00000018927		ENSMUSG00000028874		ENSMUSG00000021822		ENSMUSG00000018927	Ccl6
ENSMUSG00000026380		ENSMUSG00000048865		ENSMUSG00000021866		ENSMUSG00000026380	Tfcp2l1
ENSMUSG00000035697		ENSMUSG00000052229		ENSMUSG00000021876		ENSMUSG00000035697	Arhgap45
ENSMUSG00000045679		ENSMUSG00000043740		ENSMUSG00000021886		ENSMUSG00000045679	Pqlc3
ENSMUSG00000048779		ENSMUSG00000092447		ENSMUSG00000021903		ENSMUSG00000048779	P2ry6
ENSMUSG00000112023		ENSMUSG00000063354		ENSMUSG00000021939		ENSMUSG00000112023	Lilrb4b
ENSMUSG00000040751		ENSMUSG00000073411		ENSMUSG00000021943		ENSMUSG00000040751	Lat2
ENSMUSG00000024965		ENSMUSG00000033777		ENSMUSG00000021948		ENSMUSG00000024965	Fermt3
ENSMUSG00000044583		ENSMUSG00000023885		ENSMUSG00000022094		ENSMUSG00000044583	Tlr7
ENSMUSG00000028327		ENSMUSG00000034708		ENSMUSG00000022146		ENSMUSG00000028327	Stra6l
ENSMUSG00000028874		ENSMUSG00000030798		ENSMUSG00000022148		ENSMUSG00000028874	Fgr
ENSMUSG00000028238		ENSMUSG00000052160		ENSMUSG00000022180		ENSMUSG00000028238	Atp6v0d2
ENSMUSG00000031838		ENSMUSG00000039457		ENSMUSG00000022218		ENSMUSG00000031838	Ifi30
ENSMUSG00000058818		ENSMUSG00000115529		ENSMUSG00000022231		ENSMUSG00000058818	Pirb
ENSMUSG00000068699		ENSMUSG00000000628		ENSMUSG00000022321		ENSMUSG00000068699	Flnc
ENSMUSG00000039457		ENSMUSG00000097352		ENSMUSG00000022346		ENSMUSG00000039457	Ppl
ENSMUSG00000043157		ENSMUSG00000021624		ENSMUSG00000022351		ENSMUSG00000043157	Arl11
ENSMUSG00000026547		ENSMUSG00000052336		ENSMUSG00000022372		ENSMUSG00000026547	Tagln2
ENSMUSG00000114189		ENSMUSG00000042834		ENSMUSG00000022425		ENSMUSG00000114189	9330199G10Rik
ENSMUSG00000061232		ENSMUSG00000048411		ENSMUSG00000022439		ENSMUSG00000061232	H2-K1
ENSMUSG00000031264		ENSMUSG00000021423		ENSMUSG00000022488		ENSMUSG00000031264	Btk
ENSMUSG00000004891		ENSMUSG00000036853		ENSMUSG00000022490		ENSMUSG00000004891	Nes
ENSMUSG00000040170		ENSMUSG00000086109		ENSMUSG00000022514		ENSMUSG00000040170	Fmo2
ENSMUSG00000033386		ENSMUSG00000026380		ENSMUSG00000022548		ENSMUSG00000033386	Frrs1
ENSMUSG00000022146		ENSMUSG00000020573		ENSMUSG00000022667		ENSMUSG00000022146	Osmr
ENSMUSG00000005087		ENSMUSG00000051678		ENSMUSG00000022817		ENSMUSG00000005087	Cd44
ENSMUSG00000058099		ENSMUSG00000058818		ENSMUSG00000022831		ENSMUSG00000058099	Nfam1
ENSMUSG00000003812		ENSMUSG00000044303		ENSMUSG00000022860		ENSMUSG00000003812	Dnase2a
ENSMUSG00000059498		ENSMUSG00000051439		ENSMUSG00000022876		ENSMUSG00000059498	Fcgr3
ENSMUSG00000025017		ENSMUSG00000021390		ENSMUSG00000022900		ENSMUSG00000025017	Pik3ap1
ENSMUSG00000070780		ENSMUSG00000020399		ENSMUSG00000022901		ENSMUSG00000070780	Rbm47
ENSMUSG00000115529		ENSMUSG00000020097		ENSMUSG00000022912		ENSMUSG00000115529	9630013A20Rik
ENSMUSG00000045689		ENSMUSG00000056888		ENSMUSG00000022951		ENSMUSG00000045689	Pcdhb4
ENSMUSG00000051506		ENSMUSG00000006219		ENSMUSG00000022952		ENSMUSG00000051506	Wdfy4
ENSMUSG00000026288		ENSMUSG00000056569		ENSMUSG00000022996		ENSMUSG00000026288	Inpp5d
ENSMUSG00000025232		ENSMUSG00000114189		ENSMUSG00000023031		ENSMUSG00000025232	Hexa
ENSMUSG00000042834		ENSMUSG00000026288		ENSMUSG00000023367		ENSMUSG00000042834	Nrep
ENSMUSG00000052942		ENSMUSG00000022817		ENSMUSG00000023885		ENSMUSG00000052942	Glis3
ENSMUSG00000007613		ENSMUSG00000047798		ENSMUSG00000023945		ENSMUSG00000007613	Tgfbr1
ENSMUSG00000024338		ENSMUSG00000074622		ENSMUSG00000023947		ENSMUSG00000024338	Psmb8
ENSMUSG00000002699		ENSMUSG00000031995		ENSMUSG00000023959		ENSMUSG00000002699	Lcp2
ENSMUSG00000048411		ENSMUSG00000113186		ENSMUSG00000023992		ENSMUSG00000048411	Gm597
ENSMUSG00000021423		ENSMUSG00000069792		ENSMUSG00000024053		ENSMUSG00000021423	Ly86
ENSMUSG00000029919		ENSMUSG00000018927		ENSMUSG00000024063		ENSMUSG00000029919	Hpgds
ENSMUSG00000021624		ENSMUSG00000044338		ENSMUSG00000024066		ENSMUSG00000021624	Cd180
ENSMUSG00000007891		ENSMUSG00000021903		ENSMUSG00000024087		ENSMUSG00000007891	Ctsd
ENSMUSG00000037580		ENSMUSG00000056529		ENSMUSG00000024124		ENSMUSG00000037580	Gch1
ENSMUSG00000041390		ENSMUSG00000015947		ENSMUSG00000024164		ENSMUSG00000041390	Mdfic
ENSMUSG00000046410		ENSMUSG00000045679		ENSMUSG00000024165		ENSMUSG00000046410	Kcnk6
ENSMUSG00000031165		ENSMUSG00000029771		ENSMUSG00000024210		ENSMUSG00000031165	Was
ENSMUSG00000035551		ENSMUSG00000052085		ENSMUSG00000024300		ENSMUSG00000035551	Igfbpl1
ENSMUSG00000031995		ENSMUSG00000025017		ENSMUSG00000024308		ENSMUSG00000031995	St14
ENSMUSG00000028599		ENSMUSG00000032122		ENSMUSG00000024334		ENSMUSG00000028599	Tnfrsf1b
ENSMUSG00000047407		ENSMUSG00000003484		ENSMUSG00000024339		ENSMUSG00000047407	Tgif1
ENSMUSG00000007480		ENSMUSG00000021886		ENSMUSG00000024397		ENSMUSG00000007480	Mc5r
ENSMUSG00000040747		ENSMUSG00000027322		ENSMUSG00000024401		ENSMUSG00000040747	Cd53
ENSMUSG00000022901		ENSMUSG00000026981		ENSMUSG00000024411		ENSMUSG00000022901	Cd86
ENSMUSG00000037321		ENSMUSG00000020865		ENSMUSG00000024486		ENSMUSG00000037321	Tap1
ENSMUSG00000018930		ENSMUSG00000038843		ENSMUSG00000024521		ENSMUSG00000018930	Ccl4
ENSMUSG00000022831		ENSMUSG00000037994		ENSMUSG00000024621		ENSMUSG00000022831	Hcls1
ENSMUSG00000003283		ENSMUSG00000025887		ENSMUSG00000024650		ENSMUSG00000003283	Hck
ENSMUSG00000113186		ENSMUSG00000064325		ENSMUSG00000024672		ENSMUSG00000113186	A330076C08Rik
ENSMUSG00000020901		ENSMUSG00000045689		ENSMUSG00000024679		ENSMUSG00000020901	Pik3r5
ENSMUSG00000000154		ENSMUSG00000025784		ENSMUSG00000024696		ENSMUSG00000000154	Slc22a18
ENSMUSG00000029826		ENSMUSG00000034330		ENSMUSG00000024737		ENSMUSG00000029826	Zc3hav1
ENSMUSG00000027322		ENSMUSG00000044583		ENSMUSG00000024778		ENSMUSG00000027322	Siglec1
ENSMUSG00000056888		ENSMUSG00000040170		ENSMUSG00000024810		ENSMUSG00000056888	Glipr1
ENSMUSG00000023885		ENSMUSG00000051506		ENSMUSG00000024965		ENSMUSG00000023885	Thbs2
ENSMUSG00000058488		ENSMUSG00000045876		ENSMUSG00000024986		ENSMUSG00000058488	Kl
ENSMUSG00000020053		ENSMUSG00000022912		ENSMUSG00000024990		ENSMUSG00000020053	Igf1
ENSMUSG00000073489		ENSMUSG00000073489		ENSMUSG00000024998		ENSMUSG00000073489	Ifi204
ENSMUSG00000035208		ENSMUSG00000031264		ENSMUSG00000025017		ENSMUSG00000035208	Slfn8
ENSMUSG00000047180		ENSMUSG00000031165		ENSMUSG00000025044		ENSMUSG00000047180	Neurl3
ENSMUSG00000045876		ENSMUSG00000024965		ENSMUSG00000025058		ENSMUSG00000045876	Pcdhb8
ENSMUSG00000024397		ENSMUSG00000053113		ENSMUSG00000025083		ENSMUSG00000024397	Aif1
ENSMUSG00000022876		ENSMUSG00000031103		ENSMUSG00000025232		ENSMUSG00000022876	Samsn1
ENSMUSG00000025877		ENSMUSG00000040528		ENSMUSG00000025278		ENSMUSG00000025877	Hk3
ENSMUSG00000053113		ENSMUSG00000028362		ENSMUSG00000025351		ENSMUSG00000053113	Socs3
ENSMUSG00000034947		ENSMUSG00000041596		ENSMUSG00000025479		ENSMUSG00000034947	Tmem106a
ENSMUSG00000032359		ENSMUSG00000036908		ENSMUSG00000025491		ENSMUSG00000032359	Ctsh
ENSMUSG00000021665		ENSMUSG00000062585		ENSMUSG00000025534		ENSMUSG00000021665	Hexb
ENSMUSG00000029641		ENSMUSG00000029919		ENSMUSG00000025597		ENSMUSG00000029641	Rasl11a
ENSMUSG00000046223		ENSMUSG00000022015		ENSMUSG00000025647		ENSMUSG00000046223	Plaur
ENSMUSG00000021886		ENSMUSG00000053318		ENSMUSG00000025701		ENSMUSG00000021886	Gpr65
ENSMUSG00000044827		ENSMUSG00000040751		ENSMUSG00000025784		ENSMUSG00000044827	Tlr1
ENSMUSG00000047798		ENSMUSG00000040747		ENSMUSG00000025795		ENSMUSG00000047798	Cd300lf
ENSMUSG00000074622		ENSMUSG00000025351		ENSMUSG00000025887		ENSMUSG00000074622	Mafb
ENSMUSG00000022912		ENSMUSG00000092312		ENSMUSG00000026043		ENSMUSG00000022912	Pros1
ENSMUSG00000004709		ENSMUSG00000046245		ENSMUSG00000026109		ENSMUSG00000004709	Cd244a
ENSMUSG00000049625		ENSMUSG00000000154		ENSMUSG00000026177		ENSMUSG00000049625	Tifab
ENSMUSG00000025784		ENSMUSG00000024672		ENSMUSG00000026227		ENSMUSG00000025784	Clec3b
ENSMUSG00000044176		ENSMUSG00000028480		ENSMUSG00000026285		ENSMUSG00000044176	Spink10
ENSMUSG00000037225		ENSMUSG00000042436		ENSMUSG00000026303		ENSMUSG00000037225	Fgf2
ENSMUSG00000034708		ENSMUSG00000093930		ENSMUSG00000026321		ENSMUSG00000034708	Grn
ENSMUSG00000042228		ENSMUSG00000024679		ENSMUSG00000026358		ENSMUSG00000042228	Lyn
ENSMUSG00000021390		ENSMUSG00000033386		ENSMUSG00000026380		ENSMUSG00000021390	Ogn
ENSMUSG00000052229		ENSMUSG00000070780		ENSMUSG00000026395		ENSMUSG00000052229	Gpr17
ENSMUSG00000028480		ENSMUSG00000053977		ENSMUSG00000026471		ENSMUSG00000028480	Glipr2
ENSMUSG00000043740		ENSMUSG00000015314		ENSMUSG00000026480		ENSMUSG00000043740	B430306N03Rik
ENSMUSG00000024679		ENSMUSG00000007480		ENSMUSG00000026483		ENSMUSG00000024679	Ms4a6d
ENSMUSG00000022439		ENSMUSG00000025479		ENSMUSG00000026536		ENSMUSG00000022439	Parvg
ENSMUSG00000022817		ENSMUSG00000024338		ENSMUSG00000026547		ENSMUSG00000022817	Itgb5
ENSMUSG00000028362		ENSMUSG00000007613		ENSMUSG00000026548		ENSMUSG00000028362	Tnfsf8
ENSMUSG00000069792		ENSMUSG00000032854		ENSMUSG00000026614		ENSMUSG00000069792	Wfdc17
ENSMUSG00000033220		ENSMUSG00000048779		ENSMUSG00000026628		ENSMUSG00000033220	Rac2
ENSMUSG00000053175		ENSMUSG00000044827		ENSMUSG00000026656		ENSMUSG00000053175	Bcl3
ENSMUSG00000024672		ENSMUSG00000047180		ENSMUSG00000026675		ENSMUSG00000024672	Ms4a7
ENSMUSG00000004952		ENSMUSG00000033579		ENSMUSG00000026697		ENSMUSG00000004952	Rasa4
ENSMUSG00000000555		ENSMUSG00000032440		ENSMUSG00000026701		ENSMUSG00000000555	Itga5
ENSMUSG00000097352		ENSMUSG00000053175		ENSMUSG00000026728		ENSMUSG00000097352	C920009B18Rik
ENSMUSG00000051048		ENSMUSG00000031838		ENSMUSG00000026778		ENSMUSG00000051048	P4ha3
ENSMUSG00000030340		ENSMUSG00000025232		ENSMUSG00000026786		ENSMUSG00000030340	Scnn1a
ENSMUSG00000079419		ENSMUSG00000022901		ENSMUSG00000026830		ENSMUSG00000079419	Ms4a6c
ENSMUSG00000025351		ENSMUSG00000046223		ENSMUSG00000026834		ENSMUSG00000025351	Cd63
ENSMUSG00000018339		ENSMUSG00000111971		ENSMUSG00000026864		ENSMUSG00000018339	Gpx3
ENSMUSG00000044338		ENSMUSG00000009185		ENSMUSG00000026879		ENSMUSG00000044338	Aplnr
ENSMUSG00000032440		ENSMUSG00000024124		ENSMUSG00000026950		ENSMUSG00000032440	Tgfbr2
ENSMUSG00000073411		ENSMUSG00000037321		ENSMUSG00000026981		ENSMUSG00000073411	H2-D1
ENSMUSG00000034394		ENSMUSG00000031425		ENSMUSG00000027022		ENSMUSG00000034394	Lif
ENSMUSG00000021217		ENSMUSG00000022831		ENSMUSG00000027188		ENSMUSG00000021217	Tshz3
ENSMUSG00000030786		ENSMUSG00000027375		ENSMUSG00000027248		ENSMUSG00000030786	Itgam
ENSMUSG00000034792		ENSMUSG00000016758		ENSMUSG00000027293		ENSMUSG00000034792	Gna15
ENSMUSG00000045382		ENSMUSG00000029641		ENSMUSG00000027315		ENSMUSG00000045382	Cxcr4
ENSMUSG00000034573		ENSMUSG00000104674		ENSMUSG00000027322		ENSMUSG00000034573	Ptpn13
ENSMUSG00000052336		ENSMUSG00000022876		ENSMUSG00000027375		ENSMUSG00000052336	Cx3cr1
ENSMUSG00000040312		ENSMUSG00000050359		ENSMUSG00000027386		ENSMUSG00000040312	Cchcr1
ENSMUSG00000073590		ENSMUSG00000032899		ENSMUSG00000027399		ENSMUSG00000073590	3222401L13Rik
ENSMUSG00000053158		ENSMUSG00000070436		ENSMUSG00000027514		ENSMUSG00000053158	Fes
ENSMUSG00000078942		ENSMUSG00000037580		ENSMUSG00000027520		ENSMUSG00000078942	Naip6
ENSMUSG00000018381		ENSMUSG00000081683		ENSMUSG00000027559		ENSMUSG00000018381	Abi3
ENSMUSG00000056569		ENSMUSG00000044043		ENSMUSG00000027646		ENSMUSG00000056569	Mpz
ENSMUSG00000064325		ENSMUSG00000002699		ENSMUSG00000027656		ENSMUSG00000064325	Hhip
ENSMUSG00000062082		ENSMUSG00000070348		ENSMUSG00000027737		ENSMUSG00000062082	Cd200r4
ENSMUSG00000040528		ENSMUSG00000028599		ENSMUSG00000027765		ENSMUSG00000040528	Milr1
ENSMUSG00000103793		ENSMUSG00000039264		ENSMUSG00000027792		ENSMUSG00000103793	Pcdhga6
ENSMUSG00000117613		ENSMUSG00000020932		ENSMUSG00000027800		ENSMUSG00000117613	Gm2629
ENSMUSG00000036908		ENSMUSG00000035208		ENSMUSG00000027824		ENSMUSG00000036908	Unc93b1
ENSMUSG00000019832		ENSMUSG00000004952		ENSMUSG00000027832		ENSMUSG00000019832	Rab32
ENSMUSG00000032089		ENSMUSG00000024401		ENSMUSG00000027848		ENSMUSG00000032089	Il10ra
ENSMUSG00000024124		ENSMUSG00000026536		ENSMUSG00000027858		ENSMUSG00000024124	Prss30
ENSMUSG00000062585		ENSMUSG00000027858		ENSMUSG00000027875		ENSMUSG00000062585	Cnr2
ENSMUSG00000055027		ENSMUSG00000024912		ENSMUSG00000027907		ENSMUSG00000055027	Smyd1
ENSMUSG00000040061		ENSMUSG00000030162		ENSMUSG00000027947		ENSMUSG00000040061	Plcb2
ENSMUSG00000003484		ENSMUSG00000102037		ENSMUSG00000027995		ENSMUSG00000003484	Cyp4f18
ENSMUSG00000021903		ENSMUSG00000050377		ENSMUSG00000028031		ENSMUSG00000021903	Galnt15
ENSMUSG00000027858		ENSMUSG00000000555		ENSMUSG00000028111		ENSMUSG00000027858	Tspan2
ENSMUSG00000028583		ENSMUSG00000104264		ENSMUSG00000028195		ENSMUSG00000028583	Pdpn
ENSMUSG00000034652		ENSMUSG00000032358		ENSMUSG00000028270		ENSMUSG00000034652	Cd300a
ENSMUSG00000025498		ENSMUSG00000079419		ENSMUSG00000028327		ENSMUSG00000025498	Irf7
ENSMUSG00000058056		ENSMUSG00000035929		ENSMUSG00000028347		ENSMUSG00000058056	Palld
ENSMUSG00000047307		ENSMUSG00000041390		ENSMUSG00000028362		ENSMUSG00000047307	Pcdhb13
ENSMUSG00000030263		ENSMUSG00000055027		ENSMUSG00000028413		ENSMUSG00000030263	Irag2
ENSMUSG00000070348		ENSMUSG00000029826		ENSMUSG00000028459		ENSMUSG00000070348	Ccnd1
ENSMUSG00000029925		ENSMUSG00000024397		ENSMUSG00000028464		ENSMUSG00000029925	Tbxas1
ENSMUSG00000035929		ENSMUSG00000056880		ENSMUSG00000028480		ENSMUSG00000035929	H2-Q4
ENSMUSG00000050377		ENSMUSG00000049115		ENSMUSG00000028494		ENSMUSG00000050377	Il31ra
ENSMUSG00000013707		ENSMUSG00000020901		ENSMUSG00000028581		ENSMUSG00000013707	Tnfaip8l2
ENSMUSG00000103332		ENSMUSG00000025877		ENSMUSG00000028583		ENSMUSG00000103332	Pcdhga2
ENSMUSG00000026303		ENSMUSG00000042228		ENSMUSG00000028599		ENSMUSG00000026303	Mlph
ENSMUSG00000026614		ENSMUSG00000026786		ENSMUSG00000028655		ENSMUSG00000026614	Slc30a10
ENSMUSG00000046245		ENSMUSG00000076439		ENSMUSG00000028859		ENSMUSG00000046245	Pilra
ENSMUSG00000029915		ENSMUSG00000044176		ENSMUSG00000028874		ENSMUSG00000029915	Clec5a
ENSMUSG00000062393		ENSMUSG00000032359		ENSMUSG00000028943		ENSMUSG00000062393	Dgkk
ENSMUSG00000063354		ENSMUSG00000058099		ENSMUSG00000029084		ENSMUSG00000063354	Slc39a4
ENSMUSG00000026480		ENSMUSG00000027800		ENSMUSG00000029135		ENSMUSG00000026480	Ncf2
ENSMUSG00000071637		ENSMUSG00000029838		ENSMUSG00000029204		ENSMUSG00000071637	Cebpd
ENSMUSG00000081683		ENSMUSG00000047407		ENSMUSG00000029219		ENSMUSG00000081683	Fzd10
ENSMUSG00000030745		ENSMUSG00000039405		ENSMUSG00000029304		ENSMUSG00000030745	Il21r
ENSMUSG00000027800		ENSMUSG00000037225		ENSMUSG00000029307		ENSMUSG00000027800	Tm4sf1
ENSMUSG00000056880		ENSMUSG00000009670		ENSMUSG00000029343		ENSMUSG00000056880	Gadl1
ENSMUSG00000018341		ENSMUSG00000003283		ENSMUSG00000029484		ENSMUSG00000018341	Il12rb2
ENSMUSG00000030921		ENSMUSG00000005320		ENSMUSG00000029561		ENSMUSG00000030921	Trim30a
ENSMUSG00000025479		ENSMUSG00000023367		ENSMUSG00000029641		ENSMUSG00000025479	Cyp2e1
ENSMUSG00000049115		ENSMUSG00000034947		ENSMUSG00000029657		ENSMUSG00000049115	Agtr1a
ENSMUSG00000111971		ENSMUSG00000058056		ENSMUSG00000029661		ENSMUSG00000111971	Gm48678
ENSMUSG00000009670		ENSMUSG00000073492		ENSMUSG00000029810		ENSMUSG00000009670	Tex11
ENSMUSG00000056130		ENSMUSG00000078942		ENSMUSG00000029816		ENSMUSG00000056130	Ticam2
ENSMUSG00000020150		ENSMUSG00000034652		ENSMUSG00000029826		ENSMUSG00000020150	Gamt
ENSMUSG00000104674		ENSMUSG00000018381		ENSMUSG00000029838		ENSMUSG00000104674	Gm42756
ENSMUSG00000053318		ENSMUSG00000056130		ENSMUSG00000029843		ENSMUSG00000053318	Slamf8
ENSMUSG00000024696		ENSMUSG00000003812		ENSMUSG00000029915		ENSMUSG00000024696	Lpxn
ENSMUSG00000033579		ENSMUSG00000005251		ENSMUSG00000029919		ENSMUSG00000033579	Fa2h
ENSMUSG00000039158		ENSMUSG00000015852		ENSMUSG00000029994		ENSMUSG00000039158	Akna
ENSMUSG00000013076		ENSMUSG00000026866		ENSMUSG00000030047		ENSMUSG00000013076	Amotl1
ENSMUSG00000023078		ENSMUSG00000103332		ENSMUSG00000030074		ENSMUSG00000023078	Cxcl13
ENSMUSG00000041596		ENSMUSG00000034394		ENSMUSG00000030108		ENSMUSG00000041596	Nlrp5-ps
ENSMUSG00000049130		ENSMUSG00000030340		ENSMUSG00000030111		ENSMUSG00000049130	C5ar1
ENSMUSG00000020932		ENSMUSG00000004951		ENSMUSG00000030116		ENSMUSG00000020932	Gfap
ENSMUSG00000031167		ENSMUSG00000071637		ENSMUSG00000030124		ENSMUSG00000031167	Rbm3
ENSMUSG00000041731		ENSMUSG00000046764		ENSMUSG00000030168		ENSMUSG00000041731	Pgm5
ENSMUSG00000044043		ENSMUSG00000085337		ENSMUSG00000030208		ENSMUSG00000044043	Pcdhb14
ENSMUSG00000032358		ENSMUSG00000041731		ENSMUSG00000030218		ENSMUSG00000032358	Fam83b
ENSMUSG00000044303		ENSMUSG00000045382		ENSMUSG00000030220		ENSMUSG00000044303	Cdkn2a
ENSMUSG00000015314		ENSMUSG00000052942		ENSMUSG00000030340		ENSMUSG00000015314	Slamf6
ENSMUSG00000070436		ENSMUSG00000111360		ENSMUSG00000030341		ENSMUSG00000070436	Serpinh1
ENSMUSG00000026786		ENSMUSG00000055413		ENSMUSG00000030342		ENSMUSG00000026786	Apbb1ip
ENSMUSG00000029622		ENSMUSG00000001506		ENSMUSG00000030399		ENSMUSG00000029622	Arpc1b
ENSMUSG00000092447		ENSMUSG00000058258		ENSMUSG00000030406		ENSMUSG00000092447	Gm7696
ENSMUSG00000021457		ENSMUSG00000021217		ENSMUSG00000030530		ENSMUSG00000021457	Syk
ENSMUSG00000005251		ENSMUSG00000055541		ENSMUSG00000030562		ENSMUSG00000005251	Ripk4
ENSMUSG00000039934		ENSMUSG00000039934		ENSMUSG00000030577		ENSMUSG00000039934	Gsap
ENSMUSG00000104264		ENSMUSG00000032501		ENSMUSG00000030579		ENSMUSG00000104264	Gm18529
ENSMUSG00000103472		ENSMUSG00000051048		ENSMUSG00000030638		ENSMUSG00000103472	Pcdhga7
ENSMUSG00000039405		ENSMUSG00000030263		ENSMUSG00000030669		ENSMUSG00000039405	Prss23
ENSMUSG00000031425		ENSMUSG00000024621		ENSMUSG00000030672		ENSMUSG00000031425	Plp1
ENSMUSG00000093930		ENSMUSG00000103793		ENSMUSG00000030737		ENSMUSG00000093930	Hmgcs1
ENSMUSG00000032501		ENSMUSG00000046410		ENSMUSG00000030745		ENSMUSG00000032501	Trib1
ENSMUSG00000010021		ENSMUSG00000013707		ENSMUSG00000030748		ENSMUSG00000010021	Kif19a
ENSMUSG00000002111		ENSMUSG00000002332		ENSMUSG00000030786		ENSMUSG00000002111	Spi1
ENSMUSG00000027074		ENSMUSG00000022439		ENSMUSG00000030789		ENSMUSG00000027074	Slc43a3
ENSMUSG00000032854		ENSMUSG00000027074		ENSMUSG00000030793		ENSMUSG00000032854	Ugt8a
ENSMUSG00000022372		ENSMUSG00000029622		ENSMUSG00000030798		ENSMUSG00000022372	Sla
ENSMUSG00000086109		ENSMUSG00000020256		ENSMUSG00000030830		ENSMUSG00000086109	Gm13391
ENSMUSG00000050359		ENSMUSG00000099974		ENSMUSG00000030905		ENSMUSG00000050359	Sprr1a
ENSMUSG00000049744		ENSMUSG00000018339		ENSMUSG00000030921		ENSMUSG00000049744	Arhgap15
ENSMUSG00000031207		ENSMUSG00000033220		ENSMUSG00000031070		ENSMUSG00000031207	Msn
ENSMUSG00000023367		ENSMUSG00000029925		ENSMUSG00000031097		ENSMUSG00000023367	Tmem176a
ENSMUSG00000033906		ENSMUSG00000031167		ENSMUSG00000031101		ENSMUSG00000033906	Zdhhc15
ENSMUSG00000042622		ENSMUSG00000025498		ENSMUSG00000031103		ENSMUSG00000042622	Maff
ENSMUSG00000005672		ENSMUSG00000044626		ENSMUSG00000031111		ENSMUSG00000005672	Kit
ENSMUSG00000055541		ENSMUSG00000030921		ENSMUSG00000031165		ENSMUSG00000055541	Lair1
ENSMUSG00000039005		ENSMUSG00000095041		ENSMUSG00000031167		ENSMUSG00000039005	Tlr4
ENSMUSG00000004951		ENSMUSG00000092471		ENSMUSG00000031207		ENSMUSG00000004951	Hspb1
ENSMUSG00000020437		ENSMUSG00000040312		ENSMUSG00000031210		ENSMUSG00000020437	Myo1g
ENSMUSG00000022665		ENSMUSG00000047307		ENSMUSG00000031232		ENSMUSG00000022665	Ccdc80
ENSMUSG00000005320		ENSMUSG00000024066		ENSMUSG00000031239		ENSMUSG00000005320	Fgfr4
ENSMUSG00000052397		ENSMUSG00000014599		ENSMUSG00000031264		ENSMUSG00000052397	Ezr
ENSMUSG00000073492		ENSMUSG00000039158		ENSMUSG00000031304		ENSMUSG00000073492	Gm10521
ENSMUSG00000030793		ENSMUSG00000097654		ENSMUSG00000031349		ENSMUSG00000030793	Pycard
ENSMUSG00000026749		ENSMUSG00000073590		ENSMUSG00000031375		ENSMUSG00000026749	Nek6
ENSMUSG00000096948		ENSMUSG00000117613		ENSMUSG00000031425		ENSMUSG00000096948	Gm4221
ENSMUSG00000070034		ENSMUSG00000033327		ENSMUSG00000031431		ENSMUSG00000070034	Sp110
ENSMUSG00000027375		ENSMUSG00000034792		ENSMUSG00000031504		ENSMUSG00000027375	Mal
ENSMUSG00000076439		ENSMUSG00000004098		ENSMUSG00000031557		ENSMUSG00000076439	Mog
ENSMUSG00000034457		ENSMUSG00000115230		ENSMUSG00000031604		ENSMUSG00000034457	Eda2r
ENSMUSG00000057596		ENSMUSG00000114479		ENSMUSG00000031825		ENSMUSG00000057596	Trim30d
ENSMUSG00000054509		ENSMUSG00000024696		ENSMUSG00000031827		ENSMUSG00000054509	Parp4
ENSMUSG00000111360		ENSMUSG00000031604		ENSMUSG00000031875		ENSMUSG00000111360	Gm38642
ENSMUSG00000114479		ENSMUSG00000002111		ENSMUSG00000031903		ENSMUSG00000114479	Gm49375
ENSMUSG00000015852		ENSMUSG00000029561		ENSMUSG00000031972		ENSMUSG00000015852	Fcrls
ENSMUSG00000027188		ENSMUSG00000030745		ENSMUSG00000031995		ENSMUSG00000027188	Pamr1
ENSMUSG00000044626		ENSMUSG00000049625		ENSMUSG00000032018		ENSMUSG00000044626	Liph
ENSMUSG00000041460		ENSMUSG00000032089		ENSMUSG00000032033		ENSMUSG00000041460	Cacna2d4
ENSMUSG00000018920		ENSMUSG00000097194		ENSMUSG00000032060		ENSMUSG00000018920	Cxcl16
ENSMUSG00000031387		ENSMUSG00000026303		ENSMUSG00000032089		ENSMUSG00000031387	Renbp
ENSMUSG00000026536		ENSMUSG00000041538		ENSMUSG00000032122		ENSMUSG00000026536	Ifi211
ENSMUSG00000021763		ENSMUSG00000040061		ENSMUSG00000032193		ENSMUSG00000021763	Cspg4b
ENSMUSG00000034707		ENSMUSG00000020150		ENSMUSG00000032300		ENSMUSG00000034707	Gns
ENSMUSG00000029204		ENSMUSG00000049130		ENSMUSG00000032358		ENSMUSG00000029204	Rhoh
ENSMUSG00000029561		ENSMUSG00000001467		ENSMUSG00000032359		ENSMUSG00000029561	Oasl2
ENSMUSG00000042190		ENSMUSG00000104291		ENSMUSG00000032434		ENSMUSG00000042190	Cmklr1
ENSMUSG00000046879		ENSMUSG00000031207		ENSMUSG00000032440		ENSMUSG00000046879	Irgm1
ENSMUSG00000047810		ENSMUSG00000029661		ENSMUSG00000032456		ENSMUSG00000047810	Ccdc88b
ENSMUSG00000026981		ENSMUSG00000019832		ENSMUSG00000032494		ENSMUSG00000026981	Il1rn
ENSMUSG00000058258		ENSMUSG00000042622		ENSMUSG00000032501		ENSMUSG00000058258	Idi1
ENSMUSG00000033488		ENSMUSG00000104093		ENSMUSG00000032540		ENSMUSG00000033488	Cryzl2
ENSMUSG00000104093		ENSMUSG00000035673		ENSMUSG00000032562		ENSMUSG00000104093	A330015K06Rik
ENSMUSG00000029838		ENSMUSG00000002602		ENSMUSG00000032648		ENSMUSG00000029838	Ptn
ENSMUSG00000045322		ENSMUSG00000037405		ENSMUSG00000032690		ENSMUSG00000045322	Tlr9
ENSMUSG00000067780		ENSMUSG00000010021		ENSMUSG00000032766		ENSMUSG00000067780	Pi15
ENSMUSG00000032899		ENSMUSG00000034683		ENSMUSG00000032854		ENSMUSG00000032899	Styk1
ENSMUSG00000066026		ENSMUSG00000021939		ENSMUSG00000032925		ENSMUSG00000066026	Dhrs3
ENSMUSG00000020709		ENSMUSG00000020437		ENSMUSG00000033220		ENSMUSG00000020709	Adap2
ENSMUSG00000045657		ENSMUSG00000056290		ENSMUSG00000033327		ENSMUSG00000045657	Pcdhb10
ENSMUSG00000020256		ENSMUSG00000044719		ENSMUSG00000033386		ENSMUSG00000020256	Aldh1l2
ENSMUSG00000103483		ENSMUSG00000029915		ENSMUSG00000033467		ENSMUSG00000103483	Gm20162
ENSMUSG00000051652		ENSMUSG00000030786		ENSMUSG00000033488		ENSMUSG00000051652	Lrrc3
ENSMUSG00000037405		ENSMUSG00000037254		ENSMUSG00000033579		ENSMUSG00000037405	Icam1
ENSMUSG00000021943		ENSMUSG00000103883		ENSMUSG00000033581		ENSMUSG00000021943	Gdf10
ENSMUSG00000045062		ENSMUSG00000053158		ENSMUSG00000033777		ENSMUSG00000045062	Pcdhb7
ENSMUSG00000039264		ENSMUSG00000026480		ENSMUSG00000033880		ENSMUSG00000039264	Gimap3
ENSMUSG00000046337		ENSMUSG00000048612		ENSMUSG00000033906		ENSMUSG00000046337	Fam178b
ENSMUSG00000104291		ENSMUSG00000096948		ENSMUSG00000033960		ENSMUSG00000104291	A130071D04Rik
ENSMUSG00000103144		ENSMUSG00000024334		ENSMUSG00000034116		ENSMUSG00000103144	Pcdhga1
ENSMUSG00000071715		ENSMUSG00000051652		ENSMUSG00000034127		ENSMUSG00000071715	Ncf4
ENSMUSG00000036853		ENSMUSG00000027376		ENSMUSG00000034205		ENSMUSG00000036853	Mcoln3
ENSMUSG00000037664		ENSMUSG00000081557		ENSMUSG00000034330		ENSMUSG00000037664	Cdkn1c
ENSMUSG00000022015		ENSMUSG00000039013		ENSMUSG00000034422		ENSMUSG00000022015	Tnfsf11
ENSMUSG00000037254		ENSMUSG00000031375		ENSMUSG00000034457		ENSMUSG00000037254	Itih2
ENSMUSG00000107667		ENSMUSG00000032300		ENSMUSG00000034459		ENSMUSG00000107667	C530044C16Rik
ENSMUSG00000028068		ENSMUSG00000071715		ENSMUSG00000034573		ENSMUSG00000028068	Iqgap3
ENSMUSG00000041538		ENSMUSG00000043263		ENSMUSG00000034595		ENSMUSG00000041538	H2-Ob
ENSMUSG00000027947		ENSMUSG00000030830		ENSMUSG00000034641		ENSMUSG00000027947	Il6ra
ENSMUSG00000031557		ENSMUSG00000058488		ENSMUSG00000034648		ENSMUSG00000031557	Plekha2
ENSMUSG00000073555		ENSMUSG00000066026		ENSMUSG00000034652		ENSMUSG00000073555	Gm4951
ENSMUSG00000050121		ENSMUSG00000046352		ENSMUSG00000034663		ENSMUSG00000050121	Opalin
ENSMUSG00000024066		ENSMUSG00000052397		ENSMUSG00000034683		ENSMUSG00000024066	Xdh
ENSMUSG00000043263		ENSMUSG00000013076		ENSMUSG00000034708		ENSMUSG00000043263	Ifi209
ENSMUSG00000030074		ENSMUSG00000076441		ENSMUSG00000034792		ENSMUSG00000030074	Gxylt2
ENSMUSG00000023031		ENSMUSG00000026749		ENSMUSG00000034957		ENSMUSG00000023031	Cela1
ENSMUSG00000021948		ENSMUSG00000073555		ENSMUSG00000035093		ENSMUSG00000021948	Prkcd
ENSMUSG00000038521		ENSMUSG00000059336		ENSMUSG00000035095		ENSMUSG00000038521	C1s1
ENSMUSG00000042436		ENSMUSG00000037664		ENSMUSG00000035202		ENSMUSG00000042436	Mfap4
ENSMUSG00000027376		ENSMUSG00000047810		ENSMUSG00000035208		ENSMUSG00000027376	Prom2
ENSMUSG00000024621		ENSMUSG00000042613		ENSMUSG00000035273		ENSMUSG00000024621	Csf1r
ENSMUSG00000028497		ENSMUSG00000035273		ENSMUSG00000035279		ENSMUSG00000028497	Hacd4
ENSMUSG00000033450		ENSMUSG00000036606		ENSMUSG00000035299		ENSMUSG00000033450	Tagap
ENSMUSG00000014599		ENSMUSG00000028583		ENSMUSG00000035385		ENSMUSG00000014599	Csf1
ENSMUSG00000021939		ENSMUSG00000033450		ENSMUSG00000035551		ENSMUSG00000021939	Ctsb
ENSMUSG00000046764		ENSMUSG00000021763		ENSMUSG00000035606		ENSMUSG00000046764	A530053G22Rik
ENSMUSG00000002332		ENSMUSG00000028068		ENSMUSG00000035673		ENSMUSG00000002332	Dhrs1
ENSMUSG00000039616		ENSMUSG00000034855		ENSMUSG00000035697		ENSMUSG00000039616	Mocos
ENSMUSG00000046352		ENSMUSG00000034573		ENSMUSG00000035778		ENSMUSG00000046352	Gjb2
ENSMUSG00000029994		ENSMUSG00000005672		ENSMUSG00000035896		ENSMUSG00000029994	Anxa4
ENSMUSG00000037318		ENSMUSG00000036570		ENSMUSG00000035929		ENSMUSG00000037318	Traf3ip3
ENSMUSG00000021069		ENSMUSG00000103483		ENSMUSG00000036158		ENSMUSG00000021069	Pygl
ENSMUSG00000028150		ENSMUSG00000025534		ENSMUSG00000036306		ENSMUSG00000028150	Rorc
ENSMUSG00000092312		ENSMUSG00000031827		ENSMUSG00000036446		ENSMUSG00000092312	Zfp419
ENSMUSG00000037860		ENSMUSG00000046337		ENSMUSG00000036570		ENSMUSG00000037860	Aim2
ENSMUSG00000045094		ENSMUSG00000067780		ENSMUSG00000036856		ENSMUSG00000045094	Arhgef37
ENSMUSG00000070390		ENSMUSG00000070390		ENSMUSG00000036887		ENSMUSG00000070390	Nlrp1b
ENSMUSG00000016758		ENSMUSG00000057191		ENSMUSG00000036896		ENSMUSG00000016758	Bik
ENSMUSG00000100111		ENSMUSG00000045322		ENSMUSG00000036905		ENSMUSG00000100111	A330087D11Rik
ENSMUSG00000079547		ENSMUSG00000050121		ENSMUSG00000036908		ENSMUSG00000079547	H2-DMb1
ENSMUSG00000004098		ENSMUSG00000027188		ENSMUSG00000037010		ENSMUSG00000004098	Col5a3
ENSMUSG00000054520		ENSMUSG00000033488		ENSMUSG00000037206		ENSMUSG00000054520	Sh3bp2
ENSMUSG00000052504		ENSMUSG00000027737		ENSMUSG00000037225		ENSMUSG00000052504	Epha3
ENSMUSG00000072620		ENSMUSG00000021943		ENSMUSG00000037254		ENSMUSG00000072620	Slfn2
ENSMUSG00000102037		ENSMUSG00000002603		ENSMUSG00000037278		ENSMUSG00000102037	Bcl2a1a
ENSMUSG00000055413		ENSMUSG00000029307		ENSMUSG00000037280		ENSMUSG00000055413	H2-Q5
ENSMUSG00000029695		ENSMUSG00000021670		ENSMUSG00000037321		ENSMUSG00000029695	Aass
ENSMUSG00000029307		ENSMUSG00000041559		ENSMUSG00000037370		ENSMUSG00000029307	Dmp1
ENSMUSG00000024401		ENSMUSG00000017493		ENSMUSG00000037405		ENSMUSG00000024401	Tnf
ENSMUSG00000002602		ENSMUSG00000040663		ENSMUSG00000037411		ENSMUSG00000002602	Axl
ENSMUSG00000034683		ENSMUSG00000037318		ENSMUSG00000037580		ENSMUSG00000034683	Ppp1r1c
ENSMUSG00000043008		ENSMUSG00000029204		ENSMUSG00000037621		ENSMUSG00000043008	Klhl6
ENSMUSG00000039013		ENSMUSG00000021457		ENSMUSG00000037625		ENSMUSG00000039013	Siglecf
ENSMUSG00000117239		ENSMUSG00000018920		ENSMUSG00000037664		ENSMUSG00000117239	Gpr31c
ENSMUSG00000027399		ENSMUSG00000070034		ENSMUSG00000037686		ENSMUSG00000027399	Il1a
ENSMUSG00000096727		ENSMUSG00000002341		ENSMUSG00000037731		ENSMUSG00000096727	Psmb9
ENSMUSG00000026979		ENSMUSG00000062393		ENSMUSG00000037892		ENSMUSG00000026979	Psd4
ENSMUSG00000030830		ENSMUSG00000030074		ENSMUSG00000037902		ENSMUSG00000030830	Itgal
ENSMUSG00000024778		ENSMUSG00000110633		ENSMUSG00000037946		ENSMUSG00000024778	Fas
ENSMUSG00000028970		ENSMUSG00000103472		ENSMUSG00000037994		ENSMUSG00000028970	Abcb1b
ENSMUSG00000051212		ENSMUSG00000027399		ENSMUSG00000038007		ENSMUSG00000051212	Gpr183
ENSMUSG00000034041		ENSMUSG00000096727		ENSMUSG00000038147		ENSMUSG00000034041	Lyl1
ENSMUSG00000026778		ENSMUSG00000109209		ENSMUSG00000038175		ENSMUSG00000026778	Prkcq
ENSMUSG00000040229		ENSMUSG00000030793		ENSMUSG00000038179		ENSMUSG00000040229	Gpr34
ENSMUSG00000053977		ENSMUSG00000038677		ENSMUSG00000038235		ENSMUSG00000053977	Cd8a
ENSMUSG00000006344		ENSMUSG00000100111		ENSMUSG00000038323		ENSMUSG00000006344	Ggt5
ENSMUSG00000038677		ENSMUSG00000006344		ENSMUSG00000038352		ENSMUSG00000038677	Scube3
ENSMUSG00000040663		ENSMUSG00000025161		ENSMUSG00000038437		ENSMUSG00000040663	Clcf1
ENSMUSG00000040483		ENSMUSG00000034457		ENSMUSG00000038521		ENSMUSG00000040483	Xaf1
ENSMUSG00000085337		ENSMUSG00000079017		ENSMUSG00000038530		ENSMUSG00000085337	Gm15964
ENSMUSG00000062480		ENSMUSG00000043822		ENSMUSG00000038540		ENSMUSG00000062480	Acat3
ENSMUSG00000028369		ENSMUSG00000037280		ENSMUSG00000038642		ENSMUSG00000028369	Svep1
ENSMUSG00000030223		ENSMUSG00000034422		ENSMUSG00000038668		ENSMUSG00000030223	Ptpro
ENSMUSG00000000732		ENSMUSG00000073491		ENSMUSG00000038793		ENSMUSG00000000732	Icosl
ENSMUSG00000026126		ENSMUSG00000117733		ENSMUSG00000038843		ENSMUSG00000026126	Ptpn18
ENSMUSG00000026109		ENSMUSG00000072621		ENSMUSG00000038936		ENSMUSG00000026109	Tmeff2
ENSMUSG00000025534		ENSMUSG00000030681		ENSMUSG00000039005		ENSMUSG00000025534	Gusb
ENSMUSG00000098112		ENSMUSG00000004040		ENSMUSG00000039013		ENSMUSG00000098112	Bin2
ENSMUSG00000039116		ENSMUSG00000076609		ENSMUSG00000039158		ENSMUSG00000039116	Adgrg6
ENSMUSG00000043822		ENSMUSG00000049744		ENSMUSG00000039232		ENSMUSG00000043822	Adamtsl5
ENSMUSG00000031604		ENSMUSG00000027875		ENSMUSG00000039264		ENSMUSG00000031604	Msmo1
ENSMUSG00000027315		ENSMUSG00000059994		ENSMUSG00000039323		ENSMUSG00000027315	Spint1
ENSMUSG00000002603		ENSMUSG00000026109		ENSMUSG00000039385		ENSMUSG00000002603	Tgfb1
ENSMUSG00000017493		ENSMUSG00000023031		ENSMUSG00000039405		ENSMUSG00000017493	Igfbp4
ENSMUSG00000031875		ENSMUSG00000057596		ENSMUSG00000039457		ENSMUSG00000031875	Cmtm3
ENSMUSG00000025161		ENSMUSG00000062545		ENSMUSG00000039518		ENSMUSG00000025161	Slc16a3
ENSMUSG00000059336		ENSMUSG00000079547		ENSMUSG00000039616		ENSMUSG00000059336	Slc14a1
ENSMUSG00000004040		ENSMUSG00000035299		ENSMUSG00000039831		ENSMUSG00000004040	Stat3
ENSMUSG00000030162		ENSMUSG00000025058		ENSMUSG00000039934		ENSMUSG00000030162	Olr1
ENSMUSG00000032300		ENSMUSG00000022351		ENSMUSG00000040055		ENSMUSG00000032300	1700017B05Rik
ENSMUSG00000056966		ENSMUSG00000036833		ENSMUSG00000040061		ENSMUSG00000056966	Gjc3
ENSMUSG00000050122		ENSMUSG00000031875		ENSMUSG00000040133		ENSMUSG00000050122	Vwa3b
ENSMUSG00000002668		ENSMUSG00000029810		ENSMUSG00000040164		ENSMUSG00000002668	Dennd1c
ENSMUSG00000097654		ENSMUSG00000071478		ENSMUSG00000040170		ENSMUSG00000097654	Gm26714
ENSMUSG00000022906		ENSMUSG00000042254		ENSMUSG00000040339		ENSMUSG00000022906	Parp9
ENSMUSG00000092528		ENSMUSG00000023045		ENSMUSG00000040552		ENSMUSG00000092528	Nlrp1c-ps
ENSMUSG00000016496		ENSMUSG00000021948		ENSMUSG00000040565		ENSMUSG00000016496	Cd274
ENSMUSG00000026031		ENSMUSG00000066861		ENSMUSG00000040613		ENSMUSG00000026031	Cflar
ENSMUSG00000009185		ENSMUSG00000059456		ENSMUSG00000040663		ENSMUSG00000009185	Ccl8
ENSMUSG00000002341		ENSMUSG00000039616		ENSMUSG00000040694		ENSMUSG00000002341	Ncan
ENSMUSG00000034422		ENSMUSG00000034041		ENSMUSG00000040699		ENSMUSG00000034422	Parp14
ENSMUSG00000048612		ENSMUSG00000027315		ENSMUSG00000040713		ENSMUSG00000048612	Myof
ENSMUSG00000034855		ENSMUSG00000030341		ENSMUSG00000040747		ENSMUSG00000034855	Cxcl10
ENSMUSG00000097194		ENSMUSG00000022372		ENSMUSG00000040759		ENSMUSG00000097194	9330175E14Rik
ENSMUSG00000029762		ENSMUSG00000067212		ENSMUSG00000040811		ENSMUSG00000029762	Akr1b8
ENSMUSG00000027209		ENSMUSG00000024650		ENSMUSG00000041075		ENSMUSG00000027209	Fam227b
ENSMUSG00000033327		ENSMUSG00000034993		ENSMUSG00000041120		ENSMUSG00000033327	Tnxb
ENSMUSG00000036570		ENSMUSG00000030905		ENSMUSG00000041220		ENSMUSG00000036570	Fxyd1
ENSMUSG00000001467		ENSMUSG00000092528		ENSMUSG00000041390		ENSMUSG00000001467	Cyp51
ENSMUSG00000027875		ENSMUSG00000104572		ENSMUSG00000041515		ENSMUSG00000027875	Hmgcs2
ENSMUSG00000031659		ENSMUSG00000038521		ENSMUSG00000041538		ENSMUSG00000031659	Adcy7
ENSMUSG00000029822		ENSMUSG00000052760		ENSMUSG00000041559		ENSMUSG00000029822	Osbpl3
ENSMUSG00000079017		ENSMUSG00000027792		ENSMUSG00000041577		ENSMUSG00000079017	Ifi27l2a
ENSMUSG00000038175		ENSMUSG00000024440		ENSMUSG00000041596		ENSMUSG00000038175	Mylip
ENSMUSG00000009585		ENSMUSG00000041460		ENSMUSG00000041731		ENSMUSG00000009585	Apobec3
ENSMUSG00000061740		ENSMUSG00000048424		ENSMUSG00000041736		ENSMUSG00000061740	Cyp2d22
ENSMUSG00000067212		ENSMUSG00000027559		ENSMUSG00000041828		ENSMUSG00000067212	H2-T23
ENSMUSG00000020388		ENSMUSG00000029843		ENSMUSG00000042190		ENSMUSG00000020388	Pdlim4
ENSMUSG00000000805		ENSMUSG00000029304		ENSMUSG00000042228		ENSMUSG00000000805	Car4
ENSMUSG00000068758		ENSMUSG00000062480		ENSMUSG00000042254		ENSMUSG00000068758	Il3ra
ENSMUSG00000037731		ENSMUSG00000033581		ENSMUSG00000042379		ENSMUSG00000037731	Themis2
ENSMUSG00000037370		ENSMUSG00000053931		ENSMUSG00000042436		ENSMUSG00000037370	Enpp1
ENSMUSG00000030681		ENSMUSG00000021070		ENSMUSG00000042515		ENSMUSG00000030681	Mvp
ENSMUSG00000022490		ENSMUSG00000028150		ENSMUSG00000042613		ENSMUSG00000022490	Ppp1r1a
ENSMUSG00000035673		ENSMUSG00000029994		ENSMUSG00000042622		ENSMUSG00000035673	Sbno2
ENSMUSG00000024486		ENSMUSG00000027209		ENSMUSG00000042677		ENSMUSG00000024486	Hbegf
ENSMUSG00000052760		ENSMUSG00000000673		ENSMUSG00000042834		ENSMUSG00000052760	A630001G21Rik
ENSMUSG00000073491		ENSMUSG00000090124		ENSMUSG00000043008		ENSMUSG00000073491	Ifi213
ENSMUSG00000035273		ENSMUSG00000020101		ENSMUSG00000043079		ENSMUSG00000035273	Hpse
ENSMUSG00000029490		ENSMUSG00000066113		ENSMUSG00000043157		ENSMUSG00000029490	Mfsd7a
ENSMUSG00000031375		ENSMUSG00000040690		ENSMUSG00000043263		ENSMUSG00000031375	Bgn
ENSMUSG00000036523		ENSMUSG00000037731		ENSMUSG00000043342		ENSMUSG00000036523	Greb1
ENSMUSG00000059456		ENSMUSG00000044726		ENSMUSG00000043415		ENSMUSG00000059456	Ptk2b
ENSMUSG00000095041		ENSMUSG00000033467		ENSMUSG00000043740		ENSMUSG00000095041	ENSMUSG00000095041
ENSMUSG00000032000		ENSMUSG00000068227		ENSMUSG00000043753		ENSMUSG00000032000	Birc3
ENSMUSG00000023249		ENSMUSG00000051663		ENSMUSG00000043924		ENSMUSG00000023249	Parp3
ENSMUSG00000029661		ENSMUSG00000051212		ENSMUSG00000043943		ENSMUSG00000029661	Col1a2
ENSMUSG00000031101		ENSMUSG00000050122		ENSMUSG00000044034		ENSMUSG00000031101	Sash3
ENSMUSG00000076441		ENSMUSG00000000732		ENSMUSG00000044042		ENSMUSG00000076441	Ass1
ENSMUSG00000073902		ENSMUSG00000037860		ENSMUSG00000044317		ENSMUSG00000073902	Gvin3
ENSMUSG00000028270		ENSMUSG00000031557		ENSMUSG00000044338		ENSMUSG00000028270	Gbp2
ENSMUSG00000036606		ENSMUSG00000037411		ENSMUSG00000044468		ENSMUSG00000036606	Plxnb2
ENSMUSG00000030220		ENSMUSG00000098112		ENSMUSG00000044519		ENSMUSG00000030220	Arhgdib
ENSMUSG00000026315		ENSMUSG00000054520		ENSMUSG00000044583		ENSMUSG00000026315	Serpinb8
ENSMUSG00000033581		ENSMUSG00000072620		ENSMUSG00000044719		ENSMUSG00000033581	Igf2bp2
ENSMUSG00000019989		ENSMUSG00000107667		ENSMUSG00000044726		ENSMUSG00000019989	Enpp3
ENSMUSG00000063458		ENSMUSG00000039116		ENSMUSG00000044811		ENSMUSG00000063458	Lrmda
ENSMUSG00000038776		ENSMUSG00000042190		ENSMUSG00000044827		ENSMUSG00000038776	Ephx1
ENSMUSG00000069893		ENSMUSG00000022014		ENSMUSG00000044938		ENSMUSG00000069893	9930111J21Rik1
ENSMUSG00000024650		ENSMUSG00000020388		ENSMUSG00000044951		ENSMUSG00000024650	Slc22a6
ENSMUSG00000040345		ENSMUSG00000056999		ENSMUSG00000045094		ENSMUSG00000040345	Arhgap9
ENSMUSG00000044022		ENSMUSG00000002668		ENSMUSG00000045193		ENSMUSG00000044022	Pcdhb21
ENSMUSG00000027737		ENSMUSG00000031659		ENSMUSG00000045294		ENSMUSG00000027737	Slc7a11
ENSMUSG00000024210		ENSMUSG00000031387		ENSMUSG00000045314		ENSMUSG00000024210	Ip6k3
ENSMUSG00000024521		ENSMUSG00000050708		ENSMUSG00000045322		ENSMUSG00000024521	Pmaip1
ENSMUSG00000110633		ENSMUSG00000037849		ENSMUSG00000045374		ENSMUSG00000110633	Gm32122
ENSMUSG00000026866		ENSMUSG00000039005		ENSMUSG00000045382		ENSMUSG00000026866	Kynu
ENSMUSG00000060519		ENSMUSG00000040714		ENSMUSG00000045502		ENSMUSG00000060519	Tor3a
ENSMUSG00000040164		ENSMUSG00000028655		ENSMUSG00000045679		ENSMUSG00000040164	Kcns1
ENSMUSG00000022014		ENSMUSG00000024778		ENSMUSG00000045932		ENSMUSG00000022014	Epsti1
ENSMUSG00000046718		ENSMUSG00000058755		ENSMUSG00000046186		ENSMUSG00000046718	Bst2
ENSMUSG00000000958		ENSMUSG00000068758		ENSMUSG00000046223		ENSMUSG00000000958	Slc7a7
ENSMUSG00000027792		ENSMUSG00000009585		ENSMUSG00000046352		ENSMUSG00000027792	Bche
ENSMUSG00000025058		ENSMUSG00000022996		ENSMUSG00000046410		ENSMUSG00000025058	Tasl
ENSMUSG00000033060		ENSMUSG00000047420		ENSMUSG00000046523		ENSMUSG00000033060	Lmo7
ENSMUSG00000043458		ENSMUSG00000029762		ENSMUSG00000046714		ENSMUSG00000043458	Pcdhb12
ENSMUSG00000066113		ENSMUSG00000046879		ENSMUSG00000046718		ENSMUSG00000066113	Adamtsl1
ENSMUSG00000070942		ENSMUSG00000054509		ENSMUSG00000046764		ENSMUSG00000070942	Il1rl2
ENSMUSG00000024912		ENSMUSG00000046718		ENSMUSG00000046768		ENSMUSG00000024912	Fosl1
ENSMUSG00000081557		ENSMUSG00000037370		ENSMUSG00000046805		ENSMUSG00000081557	Gm5697
ENSMUSG00000051906		ENSMUSG00000035385		ENSMUSG00000046879		ENSMUSG00000051906	Cd209f
ENSMUSG00000115230		ENSMUSG00000022548		ENSMUSG00000047180		ENSMUSG00000115230	AU022793
ENSMUSG00000048387		ENSMUSG00000112276		ENSMUSG00000047407		ENSMUSG00000048387	Osr1
ENSMUSG00000047420		ENSMUSG00000022860		ENSMUSG00000047420		ENSMUSG00000047420	Fam180a
ENSMUSG00000044719		ENSMUSG00000022094		ENSMUSG00000047459		ENSMUSG00000044719	E230025N22Rik
ENSMUSG00000037280		ENSMUSG00000011263		ENSMUSG00000047632		ENSMUSG00000037280	Galnt6
ENSMUSG00000047497		ENSMUSG00000040229		ENSMUSG00000047712		ENSMUSG00000047497	Adamts12
ENSMUSG00000043279		ENSMUSG00000003644		ENSMUSG00000047735		ENSMUSG00000043279	Trim56
ENSMUSG00000036833		ENSMUSG00000048489		ENSMUSG00000047875		ENSMUSG00000036833	Pnpla7
ENSMUSG00000030495		ENSMUSG00000045094		ENSMUSG00000047945		ENSMUSG00000030495	Slc7a10
ENSMUSG00000037411		ENSMUSG00000036560		ENSMUSG00000048022		ENSMUSG00000037411	Serpine1
ENSMUSG00000042613		ENSMUSG00000022665		ENSMUSG00000048040		ENSMUSG00000042613	Pbxip1
ENSMUSG00000033467		ENSMUSG00000044042		ENSMUSG00000048070		ENSMUSG00000033467	Crlf2
ENSMUSG00000073988		ENSMUSG00000079436		ENSMUSG00000048373		ENSMUSG00000073988	Ttpa
ENSMUSG00000004626		ENSMUSG00000048387		ENSMUSG00000048387		ENSMUSG00000004626	Stxbp2
ENSMUSG00000099583		ENSMUSG00000043008		ENSMUSG00000048411		ENSMUSG00000099583	H3c4
ENSMUSG00000024440		ENSMUSG00000061740		ENSMUSG00000048424		ENSMUSG00000024440	Pcdh12
ENSMUSG00000036918		ENSMUSG00000024210		ENSMUSG00000048583		ENSMUSG00000036918	Ttc7
ENSMUSG00000039607		ENSMUSG00000029695		ENSMUSG00000048647		ENSMUSG00000039607	Rbms3
ENSMUSG00000057329		ENSMUSG00000073902		ENSMUSG00000048779		ENSMUSG00000057329	Bcl2
ENSMUSG00000057191		ENSMUSG00000024675		ENSMUSG00000048865		ENSMUSG00000057191	AB124611
ENSMUSG00000021670		ENSMUSG00000034707		ENSMUSG00000048939		ENSMUSG00000021670	Hmgcr
ENSMUSG00000099974		ENSMUSG00000000805		ENSMUSG00000049103		ENSMUSG00000099974	Bcl2a1d
ENSMUSG00000034786		ENSMUSG00000026315		ENSMUSG00000049115		ENSMUSG00000034786	Gpsm3
ENSMUSG00000030144		ENSMUSG00000045062		ENSMUSG00000049130		ENSMUSG00000022231	Sema5a
ENSMUSG00000022231		ENSMUSG00000033906		ENSMUSG00000049164		ENSMUSG00000007041	Clic1
ENSMUSG00000007041		ENSMUSG00000076435		ENSMUSG00000049241		ENSMUSG00000040714	Klc3
ENSMUSG00000090894		ENSMUSG00000028270		ENSMUSG00000049625		ENSMUSG00000117733	ENSMUSG00000117733
ENSMUSG00000040714		ENSMUSG00000022667		ENSMUSG00000049721		ENSMUSG00000030562	Nox4
ENSMUSG00000117733		ENSMUSG00000022231		ENSMUSG00000049744		ENSMUSG00000050315	Synpo2
ENSMUSG00000030562		ENSMUSG00000026126		ENSMUSG00000049929		ENSMUSG00000029304	Spp1
ENSMUSG00000050315		ENSMUSG00000029135		ENSMUSG00000050063		ENSMUSG00000018796	Acsl1
ENSMUSG00000029304		ENSMUSG00000030562		ENSMUSG00000050121		ENSMUSG00000057337	Chst3
ENSMUSG00000018796		ENSMUSG00000026614		ENSMUSG00000050288		ENSMUSG00000027605	Acss2
ENSMUSG00000057337		ENSMUSG00000025795		ENSMUSG00000050335		ENSMUSG00000021697	Depdc1b
ENSMUSG00000027605		ENSMUSG00000031662		ENSMUSG00000050359		ENSMUSG00000044042	Fmn1
ENSMUSG00000021697		ENSMUSG00000026387		ENSMUSG00000050370		ENSMUSG00000029810	Tmem176b
ENSMUSG00000044042		ENSMUSG00000103144		ENSMUSG00000050377		ENSMUSG00000056394	Lig1
ENSMUSG00000029810		ENSMUSG00000049721		ENSMUSG00000050600		ENSMUSG00000024334	H2-Oa
ENSMUSG00000056394		ENSMUSG00000024339		ENSMUSG00000050666		ENSMUSG00000055172	C1ra
ENSMUSG00000024334		ENSMUSG00000111498		ENSMUSG00000050708		ENSMUSG00000002147	Stat6
ENSMUSG00000055172		ENSMUSG00000031101		ENSMUSG00000050777		ENSMUSG00000044726	Erich5
ENSMUSG00000002147		ENSMUSG00000040483		ENSMUSG00000050953		ENSMUSG00000041559	Fmod
ENSMUSG00000044726		ENSMUSG00000037686		ENSMUSG00000051048		ENSMUSG00000110649	Gm40466
ENSMUSG00000041559		ENSMUSG00000034786		ENSMUSG00000051295		ENSMUSG00000110235	Gm5086
ENSMUSG00000110649		ENSMUSG00000026979		ENSMUSG00000051439		ENSMUSG00000038235	F11r
ENSMUSG00000110235		ENSMUSG00000030256		ENSMUSG00000051652		ENSMUSG00000024998	Plce1
ENSMUSG00000038235		ENSMUSG00000086272		ENSMUSG00000051747		ENSMUSG00000021070	Bdkrb2
ENSMUSG00000024998		ENSMUSG00000066842		ENSMUSG00000052142		ENSMUSG00000022351	Sqle
ENSMUSG00000021070		ENSMUSG00000026956		ENSMUSG00000052160		ENSMUSG00000062545	Tlr12
ENSMUSG00000022351		ENSMUSG00000016918		ENSMUSG00000052229		ENSMUSG00000019850	Tnfaip3
ENSMUSG00000062545		ENSMUSG00000052776		ENSMUSG00000052336		ENSMUSG00000037278	Tmem97
ENSMUSG00000019850		ENSMUSG00000102516		ENSMUSG00000052397		ENSMUSG00000048489	Depp1
ENSMUSG00000037278		ENSMUSG00000056966		ENSMUSG00000052468		ENSMUSG00000033308	Dpyd
ENSMUSG00000048489		ENSMUSG00000047497		ENSMUSG00000052776		ENSMUSG00000031662	Snx20
ENSMUSG00000033308		ENSMUSG00000018459		ENSMUSG00000052837		ENSMUSG00000103883	Gm37010
ENSMUSG00000031662		ENSMUSG00000045657		ENSMUSG00000052942		ENSMUSG00000037638	Zbtb42
ENSMUSG00000103883		ENSMUSG00000070942		ENSMUSG00000053113		ENSMUSG00000027386	Fbln7
ENSMUSG00000037638		ENSMUSG00000006542		ENSMUSG00000053175		ENSMUSG00000053931	Cnn3
ENSMUSG00000027386		ENSMUSG00000048065		ENSMUSG00000053198		ENSMUSG00000056290	Ms4a4b
ENSMUSG00000053931		ENSMUSG00000029822		ENSMUSG00000053279		ENSMUSG00000026483	Niban1
ENSMUSG00000056290		ENSMUSG00000018217		ENSMUSG00000053318		ENSMUSG00000052776	Oas1a
ENSMUSG00000026483		ENSMUSG00000084796		ENSMUSG00000053886		ENSMUSG00000026387	Sctr
ENSMUSG00000052776		ENSMUSG00000110235		ENSMUSG00000053931		ENSMUSG00000079436	Kcnj13
ENSMUSG00000026387		ENSMUSG00000027901		ENSMUSG00000053965		ENSMUSG00000040146	Rgl3
ENSMUSG00000079436		ENSMUSG00000028494		ENSMUSG00000053977		ENSMUSG00000070031	Sp140
ENSMUSG00000040146		ENSMUSG00000070327		ENSMUSG00000054428		ENSMUSG00000048424	Ranbp3l
ENSMUSG00000070031		ENSMUSG00000002190		ENSMUSG00000054675		ENSMUSG00000029843	Slc13a4
ENSMUSG00000048424		ENSMUSG00000031903		ENSMUSG00000055027		ENSMUSG00000031827	Cotl1
ENSMUSG00000029843		ENSMUSG00000032540		ENSMUSG00000055172		ENSMUSG00000042333	Tnfrsf14
ENSMUSG00000079014		ENSMUSG00000033060		ENSMUSG00000055413		ENSMUSG00000038507	Parp12
ENSMUSG00000031827		ENSMUSG00000060802		ENSMUSG00000055541		ENSMUSG00000022575	Gsdmd
ENSMUSG00000042333		ENSMUSG00000068335		ENSMUSG00000055945		ENSMUSG00000036158	Prickle1
ENSMUSG00000038507		ENSMUSG00000028195		ENSMUSG00000056174		ENSMUSG00000062175	Tgif2
ENSMUSG00000022575		ENSMUSG00000032661		ENSMUSG00000056220		ENSMUSG00000112276	5033421B08Rik
ENSMUSG00000036158		ENSMUSG00000021322		ENSMUSG00000056328		ENSMUSG00000057193	Slc44a2
ENSMUSG00000062175		ENSMUSG00000026834		ENSMUSG00000056423		ENSMUSG00000001473	Tubb6
ENSMUSG00000112276		ENSMUSG00000035093		ENSMUSG00000056529		ENSMUSG00000070532	Ccdc190
ENSMUSG00000057193		ENSMUSG00000033538		ENSMUSG00000056569		ENSMUSG00000028494	Plin2
ENSMUSG00000001473		ENSMUSG00000034641		ENSMUSG00000056737		ENSMUSG00000021556	Golm1
ENSMUSG00000070532		ENSMUSG00000037625		ENSMUSG00000056880		ENSMUSG00000022636	Alcam
ENSMUSG00000028494		ENSMUSG00000058135		ENSMUSG00000056999		ENSMUSG00000035403	Crb2
ENSMUSG00000021556		ENSMUSG00000037902		ENSMUSG00000057329		ENSMUSG00000047712	Ust
ENSMUSG00000022636		ENSMUSG00000099583		ENSMUSG00000057596		ENSMUSG00000021835	Bmp4
ENSMUSG00000035403		ENSMUSG00000036523		ENSMUSG00000058056		ENSMUSG00000002190	Clgn
ENSMUSG00000047712		ENSMUSG00000027547		ENSMUSG00000058099		ENSMUSG00000090124	Ugt1a7c
ENSMUSG00000021835		ENSMUSG00000002147		ENSMUSG00000058135		ENSMUSG00000005686	Ampd3
ENSMUSG00000002190		ENSMUSG00000030495		ENSMUSG00000058152		ENSMUSG00000030341	Tnfrsf1a
ENSMUSG00000090124		ENSMUSG00000055172		ENSMUSG00000058163		ENSMUSG00000045312	Lhfpl2
ENSMUSG00000005686		ENSMUSG00000057329		ENSMUSG00000058258		ENSMUSG00000056069	Otulinl
ENSMUSG00000054005		ENSMUSG00000057193		ENSMUSG00000058385		ENSMUSG00000024079	Eif2ak2
ENSMUSG00000030341		ENSMUSG00000067714		ENSMUSG00000058454		ENSMUSG00000068335	Dok1
ENSMUSG00000045312		ENSMUSG00000020387		ENSMUSG00000058488		ENSMUSG00000023947	Nfkbie
ENSMUSG00000056069		ENSMUSG00000040164		ENSMUSG00000058715		ENSMUSG00000039385	Cdh6
ENSMUSG00000024079		ENSMUSG00000029490		ENSMUSG00000058755		ENSMUSG00000030905	Crym
ENSMUSG00000068335		ENSMUSG00000035352		ENSMUSG00000058818		ENSMUSG00000031903	Pla2g15
ENSMUSG00000023947		ENSMUSG00000006281		ENSMUSG00000059336		ENSMUSG00000026956	Uap1l1
ENSMUSG00000039385		ENSMUSG00000029657		ENSMUSG00000059456		ENSMUSG00000109209	Gm45104
ENSMUSG00000030905		ENSMUSG00000039865		ENSMUSG00000059498		ENSMUSG00000048065	Cyb5r2
ENSMUSG00000031903		ENSMUSG00000000386		ENSMUSG00000059555		ENSMUSG00000086272	BC039966
ENSMUSG00000026956		ENSMUSG00000062175		ENSMUSG00000059994		ENSMUSG00000033538	Casp4
ENSMUSG00000109209		ENSMUSG00000024486		ENSMUSG00000060044		ENSMUSG00000068323	Slc4a5
ENSMUSG00000048065		ENSMUSG00000028369		ENSMUSG00000060441		ENSMUSG00000021280	Exoc3l4
ENSMUSG00000086272		ENSMUSG00000021069		ENSMUSG00000060519		ENSMUSG00000006542	Prkag3
ENSMUSG00000033538		ENSMUSG00000041736		ENSMUSG00000060550		ENSMUSG00000034993	Vat1
ENSMUSG00000068323		ENSMUSG00000085773		ENSMUSG00000060802		ENSMUSG00000022969	Il10rb
ENSMUSG00000021280		ENSMUSG00000023249		ENSMUSG00000061039		ENSMUSG00000006281	Tep1
ENSMUSG00000006542		ENSMUSG00000025243		ENSMUSG00000061132		ENSMUSG00000092471	Cyp21a2-ps
ENSMUSG00000034993		ENSMUSG00000097365		ENSMUSG00000061232		ENSMUSG00000000673	Haao
ENSMUSG00000022969		ENSMUSG00000004626		ENSMUSG00000061723		ENSMUSG00000033016	Nfatc1
ENSMUSG00000006281		ENSMUSG00000105948		ENSMUSG00000061740		ENSMUSG00000019823	Mical1
ENSMUSG00000092471		ENSMUSG00000027947		ENSMUSG00000061816		ENSMUSG00000075224	Lrrc55
ENSMUSG00000000673		ENSMUSG00000039232		ENSMUSG00000062382		ENSMUSG00000037892	Pcdh18
ENSMUSG00000033016		ENSMUSG00000045312		ENSMUSG00000062393		ENSMUSG00000052353	Cemip
ENSMUSG00000019823		ENSMUSG00000043458		ENSMUSG00000062585		ENSMUSG00000005413	Hmox1
ENSMUSG00000075224		ENSMUSG00000039831		ENSMUSG00000063234		ENSMUSG00000003644	Rps6ka1
ENSMUSG00000037892		ENSMUSG00000050315		ENSMUSG00000063286		ENSMUSG00000049929	Lpar4
ENSMUSG00000052353		ENSMUSG00000020092		ENSMUSG00000063354		ENSMUSG00000106734	Gm20559
ENSMUSG00000005413		ENSMUSG00000039323		ENSMUSG00000063415		ENSMUSG00000032540	Abhd5
ENSMUSG00000003644		ENSMUSG00000020709		ENSMUSG00000063594		ENSMUSG00000024013	Fgd2
ENSMUSG00000049929		ENSMUSG00000036814		ENSMUSG00000064267		ENSMUSG00000021322	Aoah
ENSMUSG00000106734		ENSMUSG00000031349		ENSMUSG00000064325		ENSMUSG00000021411	Pxdc1
ENSMUSG00000032540		ENSMUSG00000022906		ENSMUSG00000064345		ENSMUSG00000035279	Ssc5d
ENSMUSG00000024013		ENSMUSG00000037638		ENSMUSG00000064354		ENSMUSG00000044456	Rin3
ENSMUSG00000079012		ENSMUSG00000000958		ENSMUSG00000066026		ENSMUSG00000066861	Oas1g
ENSMUSG00000021322		ENSMUSG00000023945		ENSMUSG00000066058		ENSMUSG00000108897	Gm44861
ENSMUSG00000021411		ENSMUSG00000043279		ENSMUSG00000067203		ENSMUSG00000022667	Cd200r1
ENSMUSG00000035279		ENSMUSG00000019232		ENSMUSG00000067212		ENSMUSG00000020101	Vsir
ENSMUSG00000044456		ENSMUSG00000064358		ENSMUSG00000067586		ENSMUSG00000024339	Tap2
ENSMUSG00000066861		ENSMUSG00000030223		ENSMUSG00000067714		ENSMUSG00000011263	Exoc3l2
ENSMUSG00000108897		ENSMUSG00000027514		ENSMUSG00000067780		ENSMUSG00000059994	Fcrl1
ENSMUSG00000022667		ENSMUSG00000052504		ENSMUSG00000068129		ENSMUSG00000072621	Slfn10-ps
ENSMUSG00000020101		ENSMUSG00000091649		ENSMUSG00000068335		ENSMUSG00000063506	Arhgap22
ENSMUSG00000024339		ENSMUSG00000039853		ENSMUSG00000068699		ENSMUSG00000056501	Cebpb
ENSMUSG00000011263		ENSMUSG00000030220		ENSMUSG00000069516		ENSMUSG00000028655	Mfsd2a
ENSMUSG00000059994		ENSMUSG00000028970		ENSMUSG00000069792		ENSMUSG00000029135	Fosl2
ENSMUSG00000072621		ENSMUSG00000019850		ENSMUSG00000069793		ENSMUSG00000104572	Fbxw23
ENSMUSG00000063506		ENSMUSG00000020000		ENSMUSG00000070327		ENSMUSG00000071478	H2ac7
ENSMUSG00000056501		ENSMUSG00000015090		ENSMUSG00000070348		ENSMUSG00000005373	Mlxipl
ENSMUSG00000028655		ENSMUSG00000057337		ENSMUSG00000070390		ENSMUSG00000034663	Bmp2k
ENSMUSG00000029135		ENSMUSG00000112843		ENSMUSG00000070392		ENSMUSG00000038732	Mboat1
ENSMUSG00000104572		ENSMUSG00000027605		ENSMUSG00000070423		ENSMUSG00000025044	Msr1
ENSMUSG00000071478		ENSMUSG00000007041		ENSMUSG00000070436		ENSMUSG00000001506	Col1a1
ENSMUSG00000005373		ENSMUSG00000019823		ENSMUSG00000070532		ENSMUSG00000071604	Fam189a2
ENSMUSG00000034663		ENSMUSG00000032018		ENSMUSG00000070942		ENSMUSG00000028195	Ccn1
ENSMUSG00000038732		ENSMUSG00000028497		ENSMUSG00000071068		ENSMUSG00000039853	Trim14
ENSMUSG00000025044		ENSMUSG00000026778		ENSMUSG00000071203		ENSMUSG00000111498	Gm47059
ENSMUSG00000001506		ENSMUSG00000060550		ENSMUSG00000071604		ENSMUSG00000035093	Secisbp2l
ENSMUSG00000071604		ENSMUSG00000046768		ENSMUSG00000071637		ENSMUSG00000030256	Bhlhe41
ENSMUSG00000028195		ENSMUSG00000069893		ENSMUSG00000071713		ENSMUSG00000039831	Arhgap29
ENSMUSG00000039853		ENSMUSG00000038811		ENSMUSG00000071714		ENSMUSG00000102748	Pcdhgb2
ENSMUSG00000111498		ENSMUSG00000001334		ENSMUSG00000071715		ENSMUSG00000039865	Slc44a3
ENSMUSG00000035093		ENSMUSG00000035279		ENSMUSG00000072620		ENSMUSG00000071398	2410004P03Rik
ENSMUSG00000030256		ENSMUSG00000115422		ENSMUSG00000072621		ENSMUSG00000037686	Aspg
ENSMUSG00000039831		ENSMUSG00000025044		ENSMUSG00000072844		ENSMUSG00000040690	Col16a1
ENSMUSG00000102748		ENSMUSG00000022425		ENSMUSG00000073411		ENSMUSG00000022860	Chodl
ENSMUSG00000039865		ENSMUSG00000047250		ENSMUSG00000073418		ENSMUSG00000038811	Gngt2
ENSMUSG00000071398		ENSMUSG00000001473		ENSMUSG00000073489		ENSMUSG00000046768	Rhoj
ENSMUSG00000037686		ENSMUSG00000075224		ENSMUSG00000073490		ENSMUSG00000020000	Moxd1
ENSMUSG00000040690		ENSMUSG00000103882		ENSMUSG00000073491		ENSMUSG00000032577	Mapkapk3
ENSMUSG00000022860		ENSMUSG00000038007		ENSMUSG00000073492		ENSMUSG00000027901	Dennd2d
ENSMUSG00000038811		ENSMUSG00000026031		ENSMUSG00000073555		ENSMUSG00000035385	Ccl2
ENSMUSG00000046768		ENSMUSG00000043079		ENSMUSG00000073802		ENSMUSG00000109245	Gm44860
ENSMUSG00000020000		ENSMUSG00000040345		ENSMUSG00000073902		ENSMUSG00000066842	Hmcn1
ENSMUSG00000032577		ENSMUSG00000032000		ENSMUSG00000073988		ENSMUSG00000037902	Sirpa
ENSMUSG00000027901		ENSMUSG00000040950		ENSMUSG00000074151		ENSMUSG00000098659	1110015O18Rik
ENSMUSG00000035385		ENSMUSG00000006369		ENSMUSG00000074342		ENSMUSG00000025888	Casp1
ENSMUSG00000109245		ENSMUSG00000021697		ENSMUSG00000074361		ENSMUSG00000017760	Ctsa
ENSMUSG00000066842		ENSMUSG00000024998		ENSMUSG00000074622		ENSMUSG00000040212	Emp3
ENSMUSG00000037902		ENSMUSG00000031239		ENSMUSG00000074743		ENSMUSG00000018459	Slc13a3
ENSMUSG00000098659		ENSMUSG00000110649		ENSMUSG00000074796		ENSMUSG00000115422	4930452G13Rik
ENSMUSG00000025888		ENSMUSG00000029084		ENSMUSG00000074825		ENSMUSG00000016494	Cd34
ENSMUSG00000017760		ENSMUSG00000028031		ENSMUSG00000074896		ENSMUSG00000022548	Apod
ENSMUSG00000040212		ENSMUSG00000112095		ENSMUSG00000074909		ENSMUSG00000049721	Gal3st1
ENSMUSG00000018459		ENSMUSG00000102748		ENSMUSG00000074971		ENSMUSG00000046312	Myorg
ENSMUSG00000115422		ENSMUSG00000037892		ENSMUSG00000075010		ENSMUSG00000016918	Sulf1
ENSMUSG00000016494		ENSMUSG00000026796		ENSMUSG00000075053		ENSMUSG00000038007	Acer2
ENSMUSG00000022548		ENSMUSG00000001750		ENSMUSG00000075224		ENSMUSG00000112168	Gm34776
ENSMUSG00000049721		ENSMUSG00000063286		ENSMUSG00000076435		ENSMUSG00000022094	Slc39a14
ENSMUSG00000046312		ENSMUSG00000070031		ENSMUSG00000076439		ENSMUSG00000095609	Gm21188
ENSMUSG00000016918		ENSMUSG00000030342		ENSMUSG00000076441		ENSMUSG00000027907	S100a11
ENSMUSG00000038007		ENSMUSG00000012123		ENSMUSG00000076547		ENSMUSG00000059883	Irak4
ENSMUSG00000112168		ENSMUSG00000109127		ENSMUSG00000076609		ENSMUSG00000034595	Ppp1r18
ENSMUSG00000022094		ENSMUSG00000059089		ENSMUSG00000078942		ENSMUSG00000032456	Nmnat3
ENSMUSG00000095609		ENSMUSG00000038530		ENSMUSG00000078945		ENSMUSG00000026834	Acvr1c
ENSMUSG00000027907		ENSMUSG00000039385		ENSMUSG00000079017		ENSMUSG00000018899	Irf1
ENSMUSG00000059883		ENSMUSG00000018143		ENSMUSG00000079057		ENSMUSG00000001334	Fndc5
ENSMUSG00000034595		ENSMUSG00000024013		ENSMUSG00000079293		ENSMUSG00000041736	Tspo
ENSMUSG00000032456		ENSMUSG00000063458		ENSMUSG00000079419		ENSMUSG00000056220	Pla2g4a
ENSMUSG00000026834		ENSMUSG00000047117		ENSMUSG00000079507		ENSMUSG00000037849	Ifi206
ENSMUSG00000018899		ENSMUSG00000037406		ENSMUSG00000079547		ENSMUSG00000041220	Elovl6
ENSMUSG00000001334		ENSMUSG00000092274		ENSMUSG00000079588		ENSMUSG00000058135	Gstm1
ENSMUSG00000041736		ENSMUSG00000036918		ENSMUSG00000081557		ENSMUSG00000053965	Pde5a
ENSMUSG00000056220		ENSMUSG00000034595		ENSMUSG00000081683		ENSMUSG00000054196	Cthrc1
ENSMUSG00000037849		ENSMUSG00000003418		ENSMUSG00000082292		ENSMUSG00000044350	Lacc1
ENSMUSG00000041220		ENSMUSG00000040759		ENSMUSG00000086272		ENSMUSG00000030966	Trim21
ENSMUSG00000058135		ENSMUSG00000095115		ENSMUSG00000086844		ENSMUSG00000056999	Ide
ENSMUSG00000053965		ENSMUSG00000042333		ENSMUSG00000087278		ENSMUSG00000112112	Gm48508
ENSMUSG00000054196		ENSMUSG00000031328		ENSMUSG00000088088		ENSMUSG00000039232	Stx11
ENSMUSG00000044350		ENSMUSG00000111110		ENSMUSG00000090124		ENSMUSG00000085282	Gm15663
ENSMUSG00000030966		ENSMUSG00000100586		ENSMUSG00000090125		ENSMUSG00000040339	Fam102b
ENSMUSG00000056999		ENSMUSG00000041220		ENSMUSG00000090129		ENSMUSG00000015027	Galns
ENSMUSG00000112112		ENSMUSG00000052837		ENSMUSG00000090675		ENSMUSG00000003418	St8sia6
ENSMUSG00000039232		ENSMUSG00000071604		ENSMUSG00000090877		ENSMUSG00000029084	Cd38
ENSMUSG00000085282		ENSMUSG00000004885		ENSMUSG00000090942		ENSMUSG00000000184	Ccnd2
ENSMUSG00000040339		ENSMUSG00000058163		ENSMUSG00000091971		ENSMUSG00000030116	Mfap5
ENSMUSG00000015027		ENSMUSG00000006522		ENSMUSG00000092035		ENSMUSG00000021594	Srd5a1
ENSMUSG00000003418		ENSMUSG00000097471		ENSMUSG00000092274		ENSMUSG00000030107	Usp18
ENSMUSG00000029084		ENSMUSG00000038776		ENSMUSG00000092528		ENSMUSG00000038151	Prdm1
ENSMUSG00000000184		ENSMUSG00000021411		ENSMUSG00000093930		ENSMUSG00000030560	Ctsc
ENSMUSG00000030116		ENSMUSG00000108084		ENSMUSG00000094561		ENSMUSG00000029217	Tec
ENSMUSG00000021594		ENSMUSG00000048368		ENSMUSG00000095041		ENSMUSG00000048368	Omd
ENSMUSG00000030107		ENSMUSG00000038173		ENSMUSG00000095115		ENSMUSG00000028943	Espn
ENSMUSG00000038151		ENSMUSG00000035403		ENSMUSG00000095583		ENSMUSG00000067203	H2-K2
ENSMUSG00000030560		ENSMUSG00000021250		ENSMUSG00000095609		ENSMUSG00000036560	Lgi4
ENSMUSG00000029217		ENSMUSG00000016494		ENSMUSG00000096768		ENSMUSG00000028946	Hes3
ENSMUSG00000048368		ENSMUSG00000111765		ENSMUSG00000096833		ENSMUSG00000047250	Ptgs1
ENSMUSG00000028943		ENSMUSG00000021273		ENSMUSG00000097194		ENSMUSG00000004885	Crabp2
ENSMUSG00000067203		ENSMUSG00000070532		ENSMUSG00000097415		ENSMUSG00000025795	Rassf3
ENSMUSG00000036560		ENSMUSG00000017344		ENSMUSG00000098973		ENSMUSG00000000386	Mx1
ENSMUSG00000028946		ENSMUSG00000034205		ENSMUSG00000099583		ENSMUSG00000026051	Ecrg4
ENSMUSG00000047250		ENSMUSG00000033016		ENSMUSG00000099696		ENSMUSG00000023045	Soat2
ENSMUSG00000013974		ENSMUSG00000034663		ENSMUSG00000100862		ENSMUSG00000026928	Card9
ENSMUSG00000004885		ENSMUSG00000021556		ENSMUSG00000101249		ENSMUSG00000018143	Mafk
ENSMUSG00000025795		ENSMUSG00000030131		ENSMUSG00000102037		ENSMUSG00000103882	Gm37452
ENSMUSG00000000386		ENSMUSG00000005373		ENSMUSG00000102070		ENSMUSG00000020641	Rsad2
ENSMUSG00000026051		ENSMUSG00000092624		ENSMUSG00000102516		ENSMUSG00000002900	Lamb1
ENSMUSG00000023045		ENSMUSG00000031504		ENSMUSG00000102753		ENSMUSG00000045932	Ifit2
ENSMUSG00000026928		ENSMUSG00000047146		ENSMUSG00000103280		ENSMUSG00000046688	Tifa
ENSMUSG00000018143		ENSMUSG00000016496		ENSMUSG00000103593		ENSMUSG00000022346	Myc
ENSMUSG00000103882		ENSMUSG00000021835		ENSMUSG00000104291		ENSMUSG00000102543	Pcdhgc5
ENSMUSG00000020641		ENSMUSG00000032033		ENSMUSG00000104674		ENSMUSG00000076435	Acsf2
ENSMUSG00000002900		ENSMUSG00000053965		ENSMUSG00000104713		ENSMUSG00000029468	P2rx7
ENSMUSG00000045932		ENSMUSG00000024079		ENSMUSG00000104943		ENSMUSG00000029657	Hsph1
ENSMUSG00000046688		ENSMUSG00000102543		ENSMUSG00000106734		ENSMUSG00000000078	Klf6
ENSMUSG00000022346		ENSMUSG00000038507		ENSMUSG00000107134		ENSMUSG00000068227	Il2rb
ENSMUSG00000102543		ENSMUSG00000086763		ENSMUSG00000107667		ENSMUSG00000071847	Apcdd1
ENSMUSG00000076435		ENSMUSG00000093773		ENSMUSG00000109209		ENSMUSG00000027547	Sall4
ENSMUSG00000029468		ENSMUSG00000114755		ENSMUSG00000110235		ENSMUSG00000028031	Dkk2
ENSMUSG00000029657		ENSMUSG00000024521		ENSMUSG00000110631		ENSMUSG00000034205	Loxl2
ENSMUSG00000000078		ENSMUSG00000014361		ENSMUSG00000110633		ENSMUSG00000050708	Ftl1
ENSMUSG00000068227		ENSMUSG00000021477		ENSMUSG00000111110		ENSMUSG00000036814	Slc6a20a
ENSMUSG00000071847		ENSMUSG00000047884		ENSMUSG00000111765		ENSMUSG00000029119	Man2b2
ENSMUSG00000027547		ENSMUSG00000044022		ENSMUSG00000111995		ENSMUSG00000087278	A930006I01Rik
ENSMUSG00000048521		ENSMUSG00000027907		ENSMUSG00000112023		ENSMUSG00000027360	Hdc
ENSMUSG00000028031		ENSMUSG00000023186		ENSMUSG00000112095		ENSMUSG00000046714	Foxc2
ENSMUSG00000034205		ENSMUSG00000056069		ENSMUSG00000112112		ENSMUSG00000037625	Cldn11
ENSMUSG00000050708		ENSMUSG00000022490		ENSMUSG00000112148		ENSMUSG00000091649	Phf11b
ENSMUSG00000036814		ENSMUSG00000053886		ENSMUSG00000112168		ENSMUSG00000092035	Peg10
ENSMUSG00000029119		ENSMUSG00000000901		ENSMUSG00000112276		ENSMUSG00000040133	Gpr176
ENSMUSG00000087278		ENSMUSG00000028946		ENSMUSG00000113088		ENSMUSG00000074342	I830077J02Rik
ENSMUSG00000027360		ENSMUSG00000090877		ENSMUSG00000113186		ENSMUSG00000041479	Syt15
ENSMUSG00000114773		ENSMUSG00000041707		ENSMUSG00000114189		ENSMUSG00000027514	Zbp1
ENSMUSG00000046714		ENSMUSG00000030560		ENSMUSG00000114479		ENSMUSG00000047117	Ankdd1b
ENSMUSG00000037625		ENSMUSG00000056220		ENSMUSG00000115230		ENSMUSG00000097585	E230029C05Rik
ENSMUSG00000091649		ENSMUSG00000113591		ENSMUSG00000115422		ENSMUSG00000051663	Pcdhb1
ENSMUSG00000092035		ENSMUSG00000109245		ENSMUSG00000116180		ENSMUSG00000030862	Cpxm2
ENSMUSG00000040133		ENSMUSG00000040339		ENSMUSG00000117613		ENSMUSG00000023186	Vwa5a
ENSMUSG00000074342		ENSMUSG00000056501		ENSMUSG00000117733		ENSMUSG00000052837	Junb
ENSMUSG00000041479		ENSMUSG00000022025		ENSMUSG00000118871		ENSMUSG00000030638	Sh3gl3
ENSMUSG00000027514		ENSMUSG00000092035		ENSMUSG00000119838		ENSMUSG00000035352	Ccl12
ENSMUSG00000047117		ENSMUSG00000026051		ENSMUSG00002074846		ENSMUSG00000022996	Wnt10b
ENSMUSG00000097585		ENSMUSG00000005413		ENSMUSG00000000805		ENSMUSG00000040950	Mgl2
ENSMUSG00000051663		ENSMUSG00000100400		ENSMUSG00000003644		ENSMUSG00000021760	Gpx8
ENSMUSG00000030862		ENSMUSG00000026483		ENSMUSG00000006390		ENSMUSG00000031349	Nsdhl
ENSMUSG00000023186		ENSMUSG00000108897		ENSMUSG00000008090		ENSMUSG00000018819	Lsp1
ENSMUSG00000052837		ENSMUSG00000023947		ENSMUSG00000014361		ENSMUSG00000000901	Mmp11
ENSMUSG00000030638		ENSMUSG00000036158		ENSMUSG00000015314		ENSMUSG00000031146	Plp2
ENSMUSG00000035352		ENSMUSG00000025278		ENSMUSG00000021364		ENSMUSG00000024349	Sting1
ENSMUSG00000022996		ENSMUSG00000022575		ENSMUSG00000022014		ENSMUSG00000000753	Serpinf1
ENSMUSG00000040950		ENSMUSG00000030862		ENSMUSG00000023064		ENSMUSG00000018217	Pmp22
ENSMUSG00000021760		ENSMUSG00000074342		ENSMUSG00000024479		ENSMUSG00000109006	B230209E15Rik
ENSMUSG00000031349		ENSMUSG00000038151		ENSMUSG00000025950		ENSMUSG00000054556	Gm4876
ENSMUSG00000018819		ENSMUSG00000030107		ENSMUSG00000026749		ENSMUSG00000042997	Nhlrc3
ENSMUSG00000000901		ENSMUSG00000041479		ENSMUSG00000026840		ENSMUSG00000070327	Rnf213
ENSMUSG00000031146		ENSMUSG00000038175		ENSMUSG00000026880		ENSMUSG00000047146	Tet1
ENSMUSG00000024349		ENSMUSG00000073988		ENSMUSG00000026896		ENSMUSG00000111765	Gm10635
ENSMUSG00000000753		ENSMUSG00000000560		ENSMUSG00000027074		ENSMUSG00000006369	Fbln1
ENSMUSG00000018217		ENSMUSG00000037278		ENSMUSG00000027777		ENSMUSG00000014361	Mertk
ENSMUSG00000109006		ENSMUSG00000098659		ENSMUSG00000027971		ENSMUSG00000043342	Hoxd9
ENSMUSG00000054556		ENSMUSG00000060519		ENSMUSG00000028864		ENSMUSG00000100586	Vmn1r90
ENSMUSG00000042997		ENSMUSG00000033308		ENSMUSG00000028883		ENSMUSG00000022425	Enpp2
ENSMUSG00000070327		ENSMUSG00000058454		ENSMUSG00000028946		ENSMUSG00000058163	Gm5431
ENSMUSG00000047146		ENSMUSG00000006390		ENSMUSG00000030339		ENSMUSG00000060550	H2-Q7
ENSMUSG00000111765		ENSMUSG00000021280		ENSMUSG00000030560		ENSMUSG00000048442	Smim5
ENSMUSG00000006369		ENSMUSG00000097585		ENSMUSG00000031209		ENSMUSG00000020092	Pald1
ENSMUSG00000014361		ENSMUSG00000052631		ENSMUSG00000031333		ENSMUSG00000076609	Igkc
ENSMUSG00000099930		ENSMUSG00000106734		ENSMUSG00000034707		ENSMUSG00000103280	Gm37277
ENSMUSG00000043342		ENSMUSG00000030748		ENSMUSG00000034926		ENSMUSG00000023945	Slc5a7
ENSMUSG00000100586		ENSMUSG00000003206		ENSMUSG00000034947		ENSMUSG00000051177	Plcb1
ENSMUSG00000022425		ENSMUSG00000056498		ENSMUSG00000035042		ENSMUSG00000032698	Lmo2
ENSMUSG00000058163		ENSMUSG00000022346		ENSMUSG00000035352		ENSMUSG00000095115	Itpripl2
ENSMUSG00000060550		ENSMUSG00000036526		ENSMUSG00000040723		ENSMUSG00000107215	Gm43197
ENSMUSG00000048442		ENSMUSG00000017760		ENSMUSG00000041789		ENSMUSG00000021250	Fos
ENSMUSG00000020092		ENSMUSG00000038235		ENSMUSG00000042507		ENSMUSG00000079110	Capn3
ENSMUSG00000076609		ENSMUSG00000030123		ENSMUSG00000043252		ENSMUSG00000067714	Lpar5
ENSMUSG00000103280		ENSMUSG00000035896		ENSMUSG00000044006		ENSMUSG00000105504	Gbp5
ENSMUSG00000026228		ENSMUSG00000037010		ENSMUSG00000044626		ENSMUSG00000026880	Stom
ENSMUSG00000023945		ENSMUSG00000005686		ENSMUSG00000045667		ENSMUSG00000075463	4930594M22Rik
ENSMUSG00000051177		ENSMUSG00000040565		ENSMUSG00000047250		ENSMUSG00000025701	Alox5
ENSMUSG00000032698		ENSMUSG00000059908		ENSMUSG00000048612		ENSMUSG00000025243	Slc6a20b
ENSMUSG00000095115		ENSMUSG00000029119		ENSMUSG00000051234		ENSMUSG00000050022	Amz1
ENSMUSG00000107215		ENSMUSG00000099398		ENSMUSG00000054435		ENSMUSG00000038530	Rgs4
ENSMUSG00000021250		ENSMUSG00000038793		ENSMUSG00000054520		ENSMUSG00000063286	Gvin-ps7
ENSMUSG00000079110		ENSMUSG00000108820		ENSMUSG00000057191		ENSMUSG00000058755	Osm
ENSMUSG00000067714		ENSMUSG00000020926		ENSMUSG00000057337		ENSMUSG00000039323	Igfbp2
ENSMUSG00000105504		ENSMUSG00000040713		ENSMUSG00000059089		ENSMUSG00000111110	Gm36855
ENSMUSG00000026880		ENSMUSG00000024053		ENSMUSG00000062391		ENSMUSG00000020387	Jade2
ENSMUSG00000075463		ENSMUSG00000072844		ENSMUSG00000064363		ENSMUSG00000031538	Plat
ENSMUSG00000025701		ENSMUSG00000071398		ENSMUSG00000065845		ENSMUSG00000031351	Zfp185
ENSMUSG00000025243		ENSMUSG00000073802		ENSMUSG00000065881		ENSMUSG00000024395	Lims2
ENSMUSG00000050022		ENSMUSG00000030737		ENSMUSG00000069378		ENSMUSG00000046207	Pik3r6
ENSMUSG00000038530		ENSMUSG00000047712		ENSMUSG00000070780		ENSMUSG00000027398	Il1b
ENSMUSG00000063286		ENSMUSG00000027386		ENSMUSG00000083563		ENSMUSG00000027070	Lrp2
ENSMUSG00000058755		ENSMUSG00000083287		ENSMUSG00000091680		ENSMUSG00000030208	Emp1
ENSMUSG00000039323		ENSMUSG00000086189		ENSMUSG00000092624		ENSMUSG00000034641	Cd300ld
ENSMUSG00000111110		ENSMUSG00000028347		ENSMUSG00000097736		ENSMUSG00000015843	Rxrg
ENSMUSG00000020387		ENSMUSG00000087278		ENSMUSG00000100131		ENSMUSG00000058325	Dock1
ENSMUSG00000031538		ENSMUSG00000045932		ENSMUSG00000109127		ENSMUSG00000032033	Barx2
ENSMUSG00000098055		ENSMUSG00000030116		ENSMUSG00000112441		ENSMUSG00000063415	Cyp26b1
ENSMUSG00000031351		ENSMUSG00000030638		ENSMUSG00000117916		ENSMUSG00000112095	Sros1
ENSMUSG00000024395		ENSMUSG00000006014		ENSMUSG00000000202		ENSMUSG00000001750	Tcirg1
ENSMUSG00000046207		ENSMUSG00000022636		ENSMUSG00000005373		ENSMUSG00000025647	Shisa5
ENSMUSG00000027398		ENSMUSG00000025888		ENSMUSG00000006517		ENSMUSG00000000560	Gabra2
ENSMUSG00000027070		ENSMUSG00000079110		ENSMUSG00000019763		ENSMUSG00000019838	Slc16a10
ENSMUSG00000034777		ENSMUSG00000090942		ENSMUSG00000022074		ENSMUSG00000040759	Cmtm5
ENSMUSG00000030208		ENSMUSG00000046714		ENSMUSG00000023832		ENSMUSG00000109127	Gm31135
ENSMUSG00000034641		ENSMUSG00000068323		ENSMUSG00000024013		ENSMUSG00000116895	Gm3435
ENSMUSG00000015843		ENSMUSG00000103280		ENSMUSG00000024378		ENSMUSG00000032661	Oas3
ENSMUSG00000058325		ENSMUSG00000066058		ENSMUSG00000024440		ENSMUSG00000032018	Sc5d
ENSMUSG00000032033		ENSMUSG00000048583		ENSMUSG00000028243		ENSMUSG00000066058	Cldn19
ENSMUSG00000063415		ENSMUSG00000032849		ENSMUSG00000028369		ENSMUSG00000027559	Car3
ENSMUSG00000112095		ENSMUSG00000024810		ENSMUSG00000029718		ENSMUSG00000026896	Ifih1
ENSMUSG00000001750		ENSMUSG00000043298		ENSMUSG00000030123		ENSMUSG00000032849	Abcc4
ENSMUSG00000025647		ENSMUSG00000027360		ENSMUSG00000031170		ENSMUSG00000022454	Nell2
ENSMUSG00000000560		ENSMUSG00000055994		ENSMUSG00000031373		ENSMUSG00000104713	Gbp6
ENSMUSG00000019838		ENSMUSG00000034957		ENSMUSG00000031538		ENSMUSG00000107134	Gm42528
ENSMUSG00000040759		ENSMUSG00000025647		ENSMUSG00000031673		ENSMUSG00000097365	C030034L19Rik
ENSMUSG00000109127		ENSMUSG00000031111		ENSMUSG00000032231		ENSMUSG00000020227	Irak3
ENSMUSG00000116895		ENSMUSG00000032456		ENSMUSG00000032280		ENSMUSG00000060802	B2m
ENSMUSG00000032661		ENSMUSG00000116895		ENSMUSG00000032349		ENSMUSG00000115149	9330188P03Rik
ENSMUSG00000032018		ENSMUSG00000067203		ENSMUSG00000035000		ENSMUSG00000084796	Mir142hg
ENSMUSG00000066058		ENSMUSG00000020641		ENSMUSG00000036894		ENSMUSG00000097307	Gm26834
ENSMUSG00000027559		ENSMUSG00000042997		ENSMUSG00000037868		ENSMUSG00000035910	Dcdc2a
ENSMUSG00000026896		ENSMUSG00000056394		ENSMUSG00000041479		ENSMUSG00000048583	Igf2
ENSMUSG00000032849		ENSMUSG00000044456		ENSMUSG00000041762		ENSMUSG00000025491	Ifitm1
ENSMUSG00000022454		ENSMUSG00000099696		ENSMUSG00000043822		ENSMUSG00000021090	Lrrc9
ENSMUSG00000104713		ENSMUSG00000061175		ENSMUSG00000045312		ENSMUSG00000097471	5830432E09Rik
ENSMUSG00000107134		ENSMUSG00000000184		ENSMUSG00000047996		ENSMUSG00000022180	Slc7a8
ENSMUSG00000097365		ENSMUSG00000049929		ENSMUSG00000050505		ENSMUSG00000021876	Rnase4
ENSMUSG00000020227		ENSMUSG00000059326		ENSMUSG00000056069		ENSMUSG00000041075	Fzd7
ENSMUSG00000060802		ENSMUSG00000033960		ENSMUSG00000057193		ENSMUSG00000049502	Dtx3l
ENSMUSG00000115149		ENSMUSG00000050063		ENSMUSG00000059734		ENSMUSG00000021273	Fdft1
ENSMUSG00000084796		ENSMUSG00000031538		ENSMUSG00000062488		ENSMUSG00000027171	Prrg4
ENSMUSG00000097307		ENSMUSG00000015341		ENSMUSG00000090671		ENSMUSG00000005968	Tuft1
ENSMUSG00000035910		ENSMUSG00000107304		ENSMUSG00000100400		ENSMUSG00000028864	Hgf
ENSMUSG00000038224		ENSMUSG00000104943		ENSMUSG00000101111		ENSMUSG00000033361	Prrg3
ENSMUSG00000048583		ENSMUSG00000028943		ENSMUSG00000105504		ENSMUSG00000015090	Ptgds
ENSMUSG00000025491		ENSMUSG00000069515		ENSMUSG00000109245		ENSMUSG00000100400	Gm29326
ENSMUSG00000021090		ENSMUSG00000025701		ENSMUSG00000116809		ENSMUSG00000026227	2810459M11Rik
ENSMUSG00000097471		ENSMUSG00000019989		ENSMUSG00000119584		ENSMUSG00000047642	D930020B18Rik
ENSMUSG00000022180		ENSMUSG00000040146		ENSMUSG00000001123		ENSMUSG00000015143	Actn1
ENSMUSG00000021876		ENSMUSG00000038600		ENSMUSG00000001700		ENSMUSG00000028457	Atp8b5
ENSMUSG00000041075		ENSMUSG00000027848		ENSMUSG00000002475		ENSMUSG00000105948	Gm43089
ENSMUSG00000049502		ENSMUSG00000029605		ENSMUSG00000018169		ENSMUSG00000021384	Susd3
ENSMUSG00000021273		ENSMUSG00000020538		ENSMUSG00000018846		ENSMUSG00000019232	Etnppl
ENSMUSG00000027171		ENSMUSG00000046523		ENSMUSG00000018893		ENSMUSG00000031239	Itm2a
ENSMUSG00000005968		ENSMUSG00000020277		ENSMUSG00000020393		ENSMUSG00000022371	Col14a1
ENSMUSG00000028864		ENSMUSG00000018899		ENSMUSG00000020395		ENSMUSG00000079298	Klrb1b
ENSMUSG00000033361		ENSMUSG00000026832		ENSMUSG00000020875		ENSMUSG00000026321	Tnfrsf11a
ENSMUSG00000015090		ENSMUSG00000030022		ENSMUSG00000021384		ENSMUSG00000052631	Sh2d6
ENSMUSG00000100400		ENSMUSG00000112112		ENSMUSG00000021670		ENSMUSG00000059326	Csf2ra
ENSMUSG00000026227		ENSMUSG00000050666		ENSMUSG00000023186		ENSMUSG00000021009	Ptpn21
ENSMUSG00000047642		ENSMUSG00000054556		ENSMUSG00000024079		ENSMUSG00000000275	Trim25
ENSMUSG00000015143		ENSMUSG00000001751		ENSMUSG00000027171		ENSMUSG00000055994	Nod2
ENSMUSG00000028457		ENSMUSG00000031304		ENSMUSG00000027965		ENSMUSG00000002459	Rgs20
ENSMUSG00000105948		ENSMUSG00000018796		ENSMUSG00000029762		ENSMUSG00000035121	Neil2
ENSMUSG00000021384		ENSMUSG00000047642		ENSMUSG00000031662		ENSMUSG00000107655	Gm44220
ENSMUSG00000019232		ENSMUSG00000020953		ENSMUSG00000031805		ENSMUSG00000030748	Il4ra
ENSMUSG00000031239		ENSMUSG00000048442		ENSMUSG00000032245		ENSMUSG00000059003	Grin2a
ENSMUSG00000022371		ENSMUSG00000117916		ENSMUSG00000033904		ENSMUSG00000031111	Igsf1
ENSMUSG00000079298		ENSMUSG00000054435		ENSMUSG00000034997		ENSMUSG00000040713	Creg1
ENSMUSG00000026321		ENSMUSG00000048163		ENSMUSG00000036606		ENSMUSG00000109695	Gm31166
ENSMUSG00000052631		ENSMUSG00000021009		ENSMUSG00000037362		ENSMUSG00000019899	Lama2
ENSMUSG00000059326		ENSMUSG00000030759		ENSMUSG00000038507		ENSMUSG00000038793	Lefty1
ENSMUSG00000021009		ENSMUSG00000030096		ENSMUSG00000038677		ENSMUSG00000104494	Gm37111
ENSMUSG00000000275		ENSMUSG00000032690		ENSMUSG00000039328		ENSMUSG00000044447	Dock5
ENSMUSG00000055994		ENSMUSG00000003573		ENSMUSG00000040528		ENSMUSG00000033960	Jcad
ENSMUSG00000002459		ENSMUSG00000018819		ENSMUSG00000040659		ENSMUSG00000041707	Tmem273
ENSMUSG00000035121		ENSMUSG00000063796		ENSMUSG00000042115		ENSMUSG00000056498	Tmem154
ENSMUSG00000107655		ENSMUSG00000038732		ENSMUSG00000045761		ENSMUSG00000032625	Thsd7a
ENSMUSG00000030748		ENSMUSG00000107215		ENSMUSG00000046160		ENSMUSG00000050666	Vstm4
ENSMUSG00000059003		ENSMUSG00000030208		ENSMUSG00000049988		ENSMUSG00000031504	Rab20
ENSMUSG00000031111		ENSMUSG00000021384		ENSMUSG00000050295		ENSMUSG00000099696	2900052N01Rik
ENSMUSG00000040713		ENSMUSG00000050022		ENSMUSG00000053411		ENSMUSG00000036894	Rap2b
ENSMUSG00000044162		ENSMUSG00000075010		ENSMUSG00000056215		ENSMUSG00000053110	Yap1
ENSMUSG00000109695		ENSMUSG00000031351		ENSMUSG00000057003		ENSMUSG00000042677	Zc3h12a
ENSMUSG00000052477		ENSMUSG00000109006		ENSMUSG00000059866		ENSMUSG00000085773	Gm16233
ENSMUSG00000019899		ENSMUSG00000100627		ENSMUSG00000067149		ENSMUSG00000030342	Cd9
ENSMUSG00000038793		ENSMUSG00000087129		ENSMUSG00000068015		ENSMUSG00000034959	Rubcnl
ENSMUSG00000104494		ENSMUSG00000040212		ENSMUSG00000069515		ENSMUSG00000038173	Enpp6
ENSMUSG00000044447		ENSMUSG00000038668		ENSMUSG00000070342		ENSMUSG00000026796	Niban2
ENSMUSG00000033960		ENSMUSG00000020427		ENSMUSG00000075307		ENSMUSG00000011382	Dhdh
ENSMUSG00000041707		ENSMUSG00000022321		ENSMUSG00000078878		ENSMUSG00000041361	Myzap
ENSMUSG00000056498		ENSMUSG00000020583		ENSMUSG00000089929		ENSMUSG00000055067	Smyd3
ENSMUSG00000032625		ENSMUSG00000021876		ENSMUSG00000100111		ENSMUSG00000043079	Synpo
ENSMUSG00000050666		ENSMUSG00000036362		ENSMUSG00000119895		ENSMUSG00000010830	Kdelr3
ENSMUSG00000031504		ENSMUSG00000051498		ENSMUSG00000000031		ENSMUSG00000029605	Oas1b
ENSMUSG00000099696		ENSMUSG00000026928		ENSMUSG00000004040		ENSMUSG00000058454	Dhcr7
ENSMUSG00000036894		ENSMUSG00000041654		ENSMUSG00000014226		ENSMUSG00000003206	Ebi3
ENSMUSG00000053110		ENSMUSG00000028457		ENSMUSG00000020884		ENSMUSG00000027435	Cd93
ENSMUSG00000042677		ENSMUSG00000032596		ENSMUSG00000021311		ENSMUSG00000026600	Soat1
ENSMUSG00000085773		ENSMUSG00000055945		ENSMUSG00000022575		ENSMUSG00000006390	Elovl1
ENSMUSG00000030342		ENSMUSG00000043342		ENSMUSG00000024338		ENSMUSG00000043415	Otud1
ENSMUSG00000034959		ENSMUSG00000031146		ENSMUSG00000027358		ENSMUSG00000041654	Slc39a11
ENSMUSG00000038173		ENSMUSG00000029217		ENSMUSG00000027547		ENSMUSG00000043252	Tmem64
ENSMUSG00000026796		ENSMUSG00000011382		ENSMUSG00000034472		ENSMUSG00000036362	P2ry13
ENSMUSG00000011382		ENSMUSG00000053198		ENSMUSG00000035898		ENSMUSG00000037406	Htra4
ENSMUSG00000041361		ENSMUSG00000037921		ENSMUSG00000038855		ENSMUSG00000042254	Cilp
ENSMUSG00000087593		ENSMUSG00000046312		ENSMUSG00000039519		ENSMUSG00000026574	Dpt
[truncated: 2,253 more rows]

## Sheet: SC MvM-IF
Deseq2		edgeR		Cuffdiff		Consensus	Name
[truncated: 369 more rows]

## Sheet: SC OvO-IF
Deseq2		edgeR		Cuffdiff		Consensus	Name
[truncated: 2,884 more rows]

[truncated: 9 more sheets: All Regions Consensus, Region Specific, Consistent Over Time, SC YvMIF, SC YvOIF, SC IF Induced Core, SC IF Only, SC Aging Only, Ensembl IDs]
